# Supplementary material for: Neoadjuvant PD-1 blockade induces T cell and cDC1 activation but fails to overcome the immunosuppressive tumor associated macrophages in recurrent glioblastoma
Source: Research Square preprint supplement (doi:10.21203/rs.3.rs-793187/v1), 2021-08-13
Supplement: Supplementary file 1 [file SuppTable1-22markerCyTOF.xlsx]

## Sheet: Sheet2
Common Markers Selected from all Panels		Metal label	Specificity	Clone	Source		Metal label	Specificity	Clone	Source		Metal label	Specificity	Clone	Source		Metal label	Specificity	Clone	Source		Metal label	Specificity	Clone	Source		Metal label	Specificity	Clone	Source
CD19		142Nd	CD19	HIB19	DVS		142Nd	CD19	HIB19	DVS		142Nd	CD19	HIB19	DVS		142Nd	CD19	HIB19	DVS		141Pr	TIGIT	MBS43	DVS		115In	Ki67 (intracellular)	E56	Invitrogen
CD25 (IL-2R)		143Nd	CD25	M-A251	BD		143Nd	CD25	M-A251	BD		143Nd	CD25	M-A251	BD		143Nd	CD25	M-A251	BD		142Nd	CD19	HIB19	DVS		141Pr	CD137 (4-1BB)	4B4-1	Biolegend
CD15 (SSEA-1)		144Nd	CD69	FN50	DVS		144Nd	CD69	FN50	DVS		144Nd	CD69	FN50	DVS		144Nd	CD69	FN50	DVS		143Nd	CD25	M-A251	BD		142Nd	CD19	HIB19	Fluidigm
CD4		145Nd	CD4	RPA-T4	DVS		145Nd	CD4	RPA-T4	DVS		145Nd	CD4	RPA-T4	DVS		145Nd	CD4	RPA-T4	DVS		144Nd	CD69	FN50	DVS		143Nd	CD25 (IL-2R)	M-A251	Biolegend
CD11c		146Nd	CD8	RPA-T8	DVS		146Nd	CD8	RPA-T8	DVS		146Nd	CD8	RPA-T8	DVS		146Nd	CD8	RPA-T8	DVS		145Nd	CD4	RPA-T4	DVS		144Nd	CD15 (SSEA-1)	W6D3	Fluidigm
CD152 (CTLA-4)		148Nd	CD274 /PD-L1	29E.2A3	DVS		148Nd	CD274 /PD-L1	29E.2A3	DVS		148Nd	CD274 /PD-L1	29E.2A3	DVS		148Nd	CD274 /PD-L1	29E.2A3	DVS		146Nd	CD8	RPA-T8	DVS		145Nd	CD4	RPA-T4	Fluidigm
CD14		150Nd	CD223 (LAG-3)	11C3C65	DVS		150Nd	CD223 (LAG-3)	11C3C65	DVS		150Nd	CD223 (LAG-3)	11C3C65	DVS		150Nd	CD223 (LAG-3)	11C3C65	DVS		148Nd	CD274 /PD-L1	29E.2A3	DVS		147Sm	CD11c	Bu15	Fluidigm
TIM3		151Eu	CD14	M5E2	DVS		151Eu	CD14	M5E2	DVS		151Eu	CD14	M5E2	DVS		151Eu	CD14	M5E2	DVS		151Eu	CD14	M5E2	DVS		148Nd	TIGIT	MBSA43	Thermo Scientific
CD279 (PD-1)		153Eu	TIM-3	F38-2E2	DVS		153Eu	TIM-3	F38-2E2	DVS		153Eu	TIM-3	F38-2E2	DVS		153Eu	TIM-3	F38-2E2	DVS		153Eu	TIM-3	F38-2E2	DVS		149Sm	CD278 (ICOS)	DX29	BD
CD274 (PD-L1)		155Gd	CD279(PD-1)	EH12.2H	DVS		153Sm	CD45RO	UCHL1	DVS		153Sm	CD45RO	UCHL1	DVS		153Sm	CD45RO	UCHL1	DVS		153Sm	CD45RO	UCHL1	DVS		150Nd	CD152 (CTLA-4)	14D3	Invitrogen
CD33		158Gd	CD33	WM53	DVS		155Gd	CD279(PD-1)	EH12.2H	DVS		155Gd	CD279(PD-1)	EH12.2H	DVS		155Gd	CD279(PD-1)	EH12.2H	DVS		155Gd	CD279(PD-1)	EH12.2H	DVS		151Eu	CD14	M5E2	Fluidigm
CD69		159Tb	CD11c	Bu15	DVS		158Gd	CD33	WM53	DVS		158Gd	CD33	WM53	DVS		158Gd	CD33	WM53	DVS		158Gd	CD33	WM53	DVS		152Sm	TCRγδ	11F2	Fluidigm
CD56 (NCAM)		161Dy	CD152 (CTLA-4)	14D3	DVS		159Tb	CD11c	Bu15	DVS		159Tb	CD11c	Bu15	DVS		159Tb	CD11c	Bu15	DVS		159Tb	CD11c	Bu15	DVS		153Eu	TIM3	F38-2E2	Fluidigm
CD38		163Dy	CD56	NCAM16.2	DVS		161Dy	CD152 (CTLA-4)	14D3	DVS		161Dy	CD152 (CTLA-4)	14D3	DVS		160Gd	CD39	A1	DVS		160Gd	CD39	A1	DVS		154Sm	CD45RO	UCHL1	Biolegend
CD16		164Dy	CD15/SSEA-1	W6D3	DVS		163Dy	CD56	NCAM16.2	DVS		163Dy	CD56	NCAM16.2	DVS		161Dy	CD152 (CTLA-4)	14D3	DVS		161Dy	CD152 (CTLA-4)	14D3	DVS		155Gd	CD279 (PD-1)	EH12.2H	Fluidigm
CD27		165Ho	CD16	3G8	DVS		164Dy	CD15/SSEA-1	W6D3	DVS		164Dy	CD15/SSEA-1	W6D3	DVS		163Dy	CD56	NCAM16.2	DVS		163Dy	CD56	NCAM16.2	DVS		156Gd	CD274 (PD-L1)	29E.2A3	Fluidigm
CD206		167ER	CD27	O323	DVS		165Ho	CD16	3G8	DVS		165Ho	CD16	3G8	DVS		164Dy	CD15/SSEA-1	W6D3	DVS		164Dy	CD15/SSEA-1	W6D3	DVS		158Gd	CD33	WM53	Fluidigm
CD45RA		168ER	CD206	MMR	DVS		167ER	CD27	O323	DVS		167ER	CD27	O323	DVS		165Ho	CD16	3G8	DVS		165Ho	CD16	3G8	DVS		159Tb	CD197 (CCR7)	G043H7	Fluidigm
CD3		169Tm	CD45RA	HI100	DVS		168ER	CD206	MMR	DVS		168ER	CD206	MMR	DVS		167ER	CD27	O323	DVS		167ER	CD27	O323	DVS		160Gd	CD39	A1	Fluidigm
HLA-DR		170ER	CD3	UCHT1	DVS		169Tm	CD45RA	HI100	DVS		169Tm	CD45RA	HI100	DVS		168ER	CD206	MMR	DVS		168ER	CD206	MMR	DVS		162Dy	CD69	FN50	Fluidigm
CD127 (IL-7Rα)		172Yb	CD38	HIT2	DVS		170ER	CD3	UCHT1	DVS		170ER	CD3	UCHT1	DVS		169Tm	CD45RA	HI100	DVS		169Tm	CD45RA	HI100	DVS		163Dy	CD56 (NCAM)	NCAM16.2	Fluidigm
CD11b		174Yb	HLA-DR	L243	DVS		172Yb	CD38	HIT2	DVS		172Yb	CD38	HIT2	DVS		170ER	CD3	UCHT1	DVS		170ER	CD3	UCHT1	DVS		164Dy	CD38	HIT2	Biolegend
		176Yb	CD127 (IL-7Ra)	A0195D5	DVS		174Yb	HLA-DR	L243	DVS		174Yb	HLA-DR	L243	DVS		172Yb	CD38	HIT2	DVS		172Yb	CD38	HIT2	DVS		165Ho	CD16	B73.1	Fluidigm
		209Bi	CD11b	ICRF44	DVS		176Yb	CD127 (IL-7Ra)	A0195D5	DVS		176Yb	CD127 (IL-7Ra)	A0195D5	DVS		174Yb	HLA-DR	L243	DVS		174Yb	HLA-DR	L243	DVS		167Er	CD27	O323	Fluidigm
							209Bi	CD11b	ICRF44	DVS		209Bi	CD11b	ICRF44	DVS		176Yb	CD127 (IL-7Ra)	A0195D5	DVS		176Yb	CD127 (IL-7Ra)	A0195D5	DVS		168Er	CD206	MMR	Fluidigm
												115In (Intracelluar)	Ki67	E56	DVS		209Bi	CD11b	ICRF44	DVS		209Bi	CD11b	ICRF44	DVS		169Tm	CD45RA	HI100	Fluidigm
																	115In (Intracelluar)	Ki67	E56	DVS		115In (Intracelluar)	Ki67	E56	DVS		170Er	CD3	UCHT1	Fluidigm
																											172Yb	CD196 (CCR6)	G034E3	Biolegend
																											174Yb	HLA-DR	L243	Fluidigm
																											175Lu	CD194 (CCR4)	L291H4	Fluidigm
																											176Yb	CD127 (IL-7Rα)	A0195D5	Fluidigm
																											209Bi	CD11b	ICRF44	Fluidigm
		Samples on this Panel					Samples on this Panel					Samples on this Panel					Samples on this Panel					Samples on this Panel					Samples on this Panel
		3484	3491	3499	3548		3663					3706	3714	3724			3733					3738	3755	3768	3769		3018	3612	3667	3851
		3550	3571	3584	3588																	3776	3802	3810	3811		3853	3854	3864	3865
		3598	3606	3607	3608																	3812	3815	3836			3869	3871	3872	3883
																											3914	3915	3927	3931
																											3933	3941	3944	3958
																											3963	4003	4006	4015
																											4024	4025	4034	4038
																											4059	4075	4101	4112
																											4117	4177	4180
