# Supplementary material for: Neoadjuvant PD-1 blockade induces T cell and cDC1 activation but fails to overcome the immunosuppressive tumor associated macrophages in recurrent glioblastoma
Source: Research Square preprint supplement (doi:10.21203/rs.3.rs-793187/v1), 2021-08-13
Supplement: Supplementary file 2 [file SuppTable2-scRNAseq-All.xlsx]

## Sheet: Markers
Gene	p_val	avg_logFC	pct.1	pct.2	p_val_adj	cluster	gene
NEAT1	0	1.07954	1	0.991	0	Dying	NEAT1
HSP90AA1	0	0.792785	0.99	0.989	0	Dying	HSP90AA1
HSPH1	0	0.771373	0.962	0.974	0	Dying	HSPH1
SLC1A3	0	0.747166	0.98	0.98	0	Dying	SLC1A3
DNAJB1	0	0.721847	0.965	0.955	0	Dying	DNAJB1
FRMD4A	0	0.68478	0.97	0.976	0	Dying	FRMD4A
MTRNR2L12	0	0.648405	0.989	0.979	0	Dying	MTRNR2L12
HSPA1B	0	0.643666	0.911	0.929	0	Dying	HSPA1B
ABL2	0	0.641827	0.952	0.946	0	Dying	ABL2
SLC11A1	0	0.63405	0.98	0.975	0	Dying	SLC11A1
HSPB1	0	0.628482	0.86	0.907	0	Dying	HSPB1
NABP1	0	0.62609	0.981	0.974	0	Dying	NABP1
DST	0	0.625673	0.992	0.984	0	Dying	DST
HSPA1A	0	0.616838	0.969	0.977	0	Dying	HSPA1A
DNAJA4	0	0.616311	0.944	0.94	0	Dying	DNAJA4
PLCG2	0	0.612488	0.975	0.963	0	Dying	PLCG2
DOCK4	0	0.605134	0.99	0.986	0	Dying	DOCK4
CCL5	0	2.06629	0.971	0.861	0	Lymphoid	CCL5
IL32	0	1.59925	0.952	0.866	0	Lymphoid	IL32
CD52	0	1.46009	0.965	0.895	0	Lymphoid	CD52
IL7R	0	1.42727	0.946	0.901	0	Lymphoid	IL7R
NKG7	0	1.33827	0.933	0.856	0	Lymphoid	NKG7
RNF19A	0	1.16364	0.984	0.957	0	Lymphoid	RNF19A
FYN	0	1.08923	0.96	0.928	0	Lymphoid	FYN
SMCHD1	0	1.06122	0.992	0.979	0	Lymphoid	SMCHD1
LCP1	0	1.05079	0.993	0.958	0	Lymphoid	LCP1
KIAA1551	0	1.04958	0.987	0.973	0	Lymphoid	KIAA1551
CEMIP2	0	1.04898	0.988	0.973	0	Lymphoid	CEMIP2
STK17B	0	1.03049	0.991	0.971	0	Lymphoid	STK17B
RUNX3	0	0.967819	0.971	0.933	0	Lymphoid	RUNX3
ITGA4	0	0.92766	0.986	0.969	0	Lymphoid	ITGA4
ISG20	0	0.891159	0.953	0.901	0	Lymphoid	ISG20
TXNIP	0	0.871416	0.989	0.96	0	Lymphoid	TXNIP
SYTL3	0	0.862531	0.983	0.97	0	Lymphoid	SYTL3
ACAP1	0	0.849932	0.927	0.862	0	Lymphoid	ACAP1
STK17A	0	0.826345	0.979	0.949	0	Lymphoid	STK17A
PPP2R5C	0	0.812482	0.974	0.955	0	Lymphoid	PPP2R5C
DUSP4	0	0.795448	0.959	0.93	0	Lymphoid	DUSP4
LEPROTL1	0	0.782376	0.969	0.935	0	Lymphoid	LEPROTL1
AHNAK	0	0.763426	0.98	0.94	0	Lymphoid	AHNAK
CBLB	0	0.756005	0.972	0.961	0	Lymphoid	CBLB
AKNA	0	0.746719	0.973	0.963	0	Lymphoid	AKNA
ARAP2	0	0.741359	0.976	0.956	0	Lymphoid	ARAP2
RAC2	0	0.724811	0.939	0.86	0	Lymphoid	RAC2
CD48	0	0.723428	0.95	0.851	0	Lymphoid	CD48
LYST	0	0.721989	0.985	0.95	0	Lymphoid	LYST
DUSP2	0	0.717276	0.948	0.891	0	Lymphoid	DUSP2
FAM129A	0	0.715648	0.978	0.936	0	Lymphoid	FAM129A
BTG1	0	0.701977	0.99	0.967	0	Lymphoid	BTG1
CYTIP	0	0.694817	0.962	0.953	0	Lymphoid	CYTIP
EZR	0	0.684263	0.988	0.962	0	Lymphoid	EZR
CDC42SE2	0	0.678661	0.968	0.936	0	Lymphoid	CDC42SE2
HLA-F	0	0.676048	0.969	0.934	0	Lymphoid	HLA-F
CRYBG1	0	0.669585	0.957	0.946	0	Lymphoid	CRYBG1
HCST	0	0.659584	0.976	0.911	0	Lymphoid	HCST
CASP8	0	0.652642	0.966	0.936	0	Lymphoid	CASP8
PDCD4	0	0.633826	0.981	0.969	0	Lymphoid	PDCD4
SYNE1	0	0.61991	0.969	0.956	0	Lymphoid	SYNE1
APOBEC3G	0	0.599989	0.945	0.878	0	Lymphoid	APOBEC3G
CYTOR	0	0.599601	0.955	0.941	0	Lymphoid	CYTOR
PTPN7	0	0.599084	0.935	0.897	0	Lymphoid	PTPN7
CCSER2	0	0.591162	0.98	0.959	0	Lymphoid	CCSER2
SPP1	0	0.892502	0.998	0.991	0	Myeloid-mono	SPP1
THBS1	0	0.76072	0.969	0.925	0	Myeloid-mono	THBS1
LYZ	0	0.747081	0.983	0.948	0	Myeloid-mono	LYZ
VCAN	0	0.745711	0.923	0.869	0	Myeloid-mono	VCAN
S100A9	0	0.699456	0.955	0.881	0	Myeloid-mono	S100A9
RNASE1	0	0.625024	0.975	0.939	0	Myeloid-mono	RNASE1
S100A10	0	0.59137	0.966	0.899	0	Myeloid-mono	S100A10
VIM	0	0.589723	0.988	0.964	0	Myeloid-mono	VIM
CD74	0	0.664086	0.998	0.978	0	Myeloid-mphage-DC	CD74
C3	0	0.663507	0.998	0.975	0	Myeloid-mphage-DC	C3
HLA-DRB1	0	0.612531	0.999	0.972	0	Myeloid-mphage-DC	HLA-DRB1
HLA-DRA	0	0.603316	0.997	0.979	0	Myeloid-mphage-DC	HLA-DRA
FGL2	0	0.598743	0.998	0.974	0	Myeloid-mphage-DC	FGL2
TUBA1A	0	1.50451	0.884	0.811	0	Tumor-normal	TUBA1A
CLU	0	1.4373	0.937	0.801	0	Tumor-normal	CLU
SEC61G	0	1.18438	0.877	0.892	0	Tumor-normal	SEC61G
MARCKSL1	0	1.13293	0.902	0.799	0	Tumor-normal	MARCKSL1
SOX4	0	1.00494	0.938	0.899	0	Tumor-normal	SOX4
S100B	0	0.938614	0.898	0.838	0	Tumor-normal	S100B
STMN1	0	0.890706	0.916	0.936	0	Tumor-normal	STMN1
SEPT7	0	0.866602	0.985	0.976	0	Tumor-normal	SEPT7
BEX3	0	0.757874	0.818	0.837	0	Tumor-normal	BEX3
GFAP	0	0.749505	0.916	0.876	0	Tumor-normal	GFAP
CKB	0	0.745973	0.916	0.853	0	Tumor-normal	CKB
ZBTB20	0	0.716638	0.982	0.966	0	Tumor-normal	ZBTB20
SELENOW	0	0.701124	0.93	0.925	0	Tumor-normal	SELENOW
PRDX2	0	0.692831	0.936	0.933	0	Tumor-normal	PRDX2
SRI	0	0.672682	0.914	0.903	0	Tumor-normal	SRI
MT3	0	0.672308	0.875	0.66	0	Tumor-normal	MT3
DYNLL1	0	0.664755	0.918	0.925	0	Tumor-normal	DYNLL1
DSTN	0	0.658839	0.931	0.958	0	Tumor-normal	DSTN
TUBB	0	0.618217	0.925	0.911	0	Tumor-normal	TUBB
TIMP1	0	0.611354	0.718	0.852	0	Tumor-normal	TIMP1
S100A6	0	0.606973	0.811	0.934	0	Tumor-normal	S100A6
GTF2I	0	0.594459	0.983	0.978	0	Tumor-normal	GTF2I
SYT11	0	0.586429	0.965	0.925	0	Tumor-normal	SYT11

## Sheet: Fractions
SampleID	Condition	IDH_status	MGMT	Myeloid-mphage-DC	Myeloid-mono	Lymphoid	Tumor-normal	Dying	LowRead	Total	CD45		%CD45	Myeloid-mphage-DC	Myeloid-mono	Lymphoid
LB3771T	GBM.new	WT	Meth	346	137	74	96	21	14	688	557			0.621185	0.245961	0.132855
LB3915T	GBM.new	WT	Meth	3207	1053	378	109	285	423	5460	4638			0.691462	0.227038	0.0815006
LB3931T	GBM.new	WT	Meth	568	511	113	120	86	214	1612	1192			0.47651	0.428691	0.0947987
LB3963T	GBM.new	WT	Meth	6827	851	347	213	355	198	8797	8025			0.850717	0.106044	0.0432399
LB3612T	GBM.new	WT	Un	2045	400	130	168	62	422	3234	2575			0.794175	0.15534	0.0504854
LB3836T	GBM.new	WT	Un	687	467	150	116	106	171	1698	1304			0.52684	0.358129	0.115031
LB3851T	GBM.new	WT	Un	3161	583	384	624	106	677	5549	4128			0.765746	0.141231	0.0930233
LB3854T	GBM.new	WT	Un	1829	379	132	133	189	292	2955	2340			0.781624	0.161966	0.0564103
LB3865T	GBM.new	WT	Un	1463	574	290	521	72	343	3263	2327			0.628706	0.24667	0.124624
LB3933T	GBM.new	WT	Un	4791	848	200	245	483	2238	8828	5839			0.820517	0.14523	0.0342524
LB3941T	GBM.new	WT	Un	3380	180	153	151	291	533	4693	3713			0.910315	0.0484783	0.0412066
LB4034T	GBM.new	WT	Un	1555	698	314	608	101	591	3868	2567			0.605765	0.271913	0.122322
LB4038T	GBM.new	WT	Un	6874	1071	238	317	82	1329	9996	8183			0.840034	0.130881	0.0290847
LB4180T	GBM.new	WT	Un	244	41	73	48	54	168	628	358			0.681564	0.114525	0.203911
LB4025T	GBM.PD1	Mut	Meth	1863	702	1691	696	160	1157	6302	4256			0.437735	0.164944	0.397321
LB3667T	GBM.PD1	WT	Meth	4122	475	1087	771	319	1736	8516	5684			0.725194	0.0835679	0.191239
LB3853T	GBM.PD1	WT	Meth	2751	248	342	63	331	178	3914	3341			0.823406	0.0742293	0.102365
LB3872T	GBM.PD1	WT	Meth	5282	558	1097	934	255	1860	10000	6937			0.761424	0.0804382	0.158138
LB4075T	GBM.PD1	WT	Meth	2031	636	598	230	222	1137	4855	3265			0.622052	0.194793	0.183155
LB3864T	GBM.PD1	WT	Un	2358	466	512	227	248	208	4020	3336			0.706835	0.139688	0.153477
LB3869T	GBM.PD1	WT	Un	477	251	230	1045	46	222	2274	958			0.497912	0.262004	0.240084
LB3914T	GBM.PD1	WT	Un	1611	290	901	100	96	579	3588	2802			0.574946	0.103498	0.321556
LB3944T	GBM.PD1	WT	Un	1076	331	749	74	110	407	2748	2156			0.499072	0.153525	0.347403
LB4003T	GBM.PD1	WT	Un	1138	368	375	1138	232	1122	4375	1881			0.604997	0.195641	0.199362
LB4006T	GBM.PD1	WT	Un	261	113	359	321	34	103	1192	733			0.356071	0.154161	0.489768
LB4024T	GBM.PD1	WT	Un	207	86	52	291	12	56	704	345			0.6	0.249275	0.150725
LB4112T	GBM.PD1	WT	Un	1366	478	286	99	74	645	2948	2130			0.641315	0.224413	0.134272
LB4117T	GBM.PD1	WT	Un	640	89	98	110	155	284	1378	827			0.773881	0.107618	0.118501
LB3958T	GBM.rec	Mut	Meth	1240	251	261	125	170	634	2695	1752			0.707763	0.143265	0.148973
LB4015T	GBM.rec	WT	Meth	143	92	61	86	30	64	476	296			0.483108	0.310811	0.206081
LB4130T	GBM.rec	WT	Meth	182	106	54	101	54	45	543	342			0.532164	0.309942	0.157895
LB4143T	GBM.rec	WT	Meth	320	276	170	101	92	290	1250	766			0.417755	0.360313	0.221932
LB3964T	GBM.rec	Mut	Un	319	132	250	406	47	74	1228	701			0.455064	0.188302	0.356633
LB4102T	GBM.rec	Mut	Un	1552	466	597	87	210	898	3811	2615			0.593499	0.178203	0.228298
LB4177T	GBM.rec	Mut	Un	988	288	150	79	212	766	2483	1426			0.692847	0.201964	0.105189
LB3018T	GBM.rec	WT	Un	329	49	113	140	46	104	781	491			0.670061	0.0997963	0.230143
LB3579T	GBM.rec	WT	Un	1651	786	344	4336	149	1127	8417	2781			0.593671	0.282632	0.123697
LB3871T	GBM.rec	WT	Un	4204	944	543	945	740	2580	10000	5691			0.73871	0.165876	0.0954138
LB4059T	GBM.rec	WT	Un	1742	455	300	435	143	581	3657	2497			0.697637	0.182219	0.120144
LB4101T	GBM.rec	WT	Un	1804	540	126	293	174	400	3342	2470			0.730364	0.218623	0.0510121
										156766
														Myeloid-mphage-DC	Myeloid-mono	Lymphoid
													ttest of IDH mut (only in GBM-rec and GBM-PD1)	0.511548	0.54418	0.390243
													ttest of MGMT meth (all)	0.51351	0.411937	0.940694

## Sheet: Fraction.p.val
	Type	new.vs.PD1.wilcox	rec.vs.PD1.wilcox
1	Myeloid-mphage-DC	0.0620417	0.78101
2	Myeloid-mono	0.328667	0.0463539
3	Lymphoid	4.53179e-05	0.251953

## Sheet: DEG
Gene	p_val	avg_logFC	pct.1	pct.2	p_val_adj	cluster	gene	diff	celltype
G0S2	2.70417e-96	0.973087	0.336	0.125	5.24636e-92	GBM.new	G0S2	0.211	Dying
CXCL8	4.99591e-82	0.835051	0.511	0.3	9.69257e-78	GBM.new	CXCL8	0.211	Dying
IL1B	1.45082e-48	0.595307	0.535	0.382	2.81474e-44	GBM.new	IL1B	0.153	Dying
CD74	2.80483e-85	-0.602485	0.799	0.892	5.44165e-81	GBM.new	CD74	-0.093	Dying
CH25H	2.89543e-51	-0.784988	0.13	0.291	5.61741e-47	GBM.new	CH25H	-0.161	Dying
MERTK	1.17173e-50	-0.59574	0.139	0.302	2.27327e-46	GBM.new	MERTK	-0.163	Dying
CCNH	4.56643e-47	-0.596949	0.17	0.333	8.85933e-43	GBM.new	CCNH	-0.163	Dying
HLA-DQA1	6.16002e-47	-0.610935	0.197	0.362	1.19511e-42	GBM.new	HLA-DQA1	-0.165	Dying
RANBP2	1.12038e-53	-0.732437	0.18	0.356	2.17365e-49	GBM.new	RANBP2	-0.176	Dying
RNF213	6.10479e-51	-0.61411	0.273	0.452	1.18439e-46	GBM.new	RNF213	-0.179	Dying
ZFAND5	9.93915e-53	-0.605464	0.28	0.462	1.9283e-48	GBM.new	ZFAND5	-0.182	Dying
MT-ATP8	9.0838e-68	-1.45305	0.206	0.402	1.76235e-63	GBM.new	MT-ATP8	-0.196	Dying
MT-ND4L	1.00126e-78	-1.17284	0.379	0.584	1.94254e-74	GBM.new	MT-ND4L	-0.205	Dying
PDK4	2.63723e-72	-1.02293	0.181	0.391	5.11649e-68	GBM.new	PDK4	-0.21	Dying
HLA-C	5.41857e-93	-0.770718	0.311	0.557	1.05126e-88	GBM.new	HLA-C	-0.246	Dying
IL1B	0	1.01732	0.43	0.21	0	GBM.new	IL1B	0.22	LowRead
CXCL8	0	1.06124	0.298	0.106	0	GBM.new	CXCL8	0.192	LowRead
SPP1	0	0.612776	0.96	0.807	0	GBM.new	SPP1	0.153	LowRead
S100A8	1.42354e-182	0.932652	0.256	0.119	2.76181e-178	GBM.new	S100A8	0.137	LowRead
S100A9	4.10991e-132	0.745206	0.311	0.185	7.97364e-128	GBM.new	S100A9	0.126	LowRead
CD74	0	-0.749918	0.839	0.896	0	GBM.new	CD74	-0.057	LowRead
MT-ND4L	5.17834e-158	-1.08186	0.164	0.318	1.00465e-153	GBM.new	MT-ND4L	-0.154	LowRead
IFI6	6.05648e-242	-1.20033	0.074	0.253	1.17502e-237	GBM.new	IFI6	-0.179	LowRead
IFITM3	1.26127e-228	-1.04943	0.129	0.316	2.44699e-224	GBM.new	IFITM3	-0.187	LowRead
HLA-DQA1	1.40659e-210	-0.793276	0.2	0.395	2.72893e-206	GBM.new	HLA-DQA1	-0.195	LowRead
HLA-C	1.63352e-249	-0.765281	0.327	0.525	3.1692e-245	GBM.new	HLA-C	-0.198	LowRead
HLA-DRB1	0	-0.702216	0.485	0.696	0	GBM.new	HLA-DRB1	-0.211	LowRead
IFI27	0	-1.93825	0.045	0.263	0	GBM.new	IFI27	-0.218	LowRead
SPP1	2.53467e-303	1.02316	0.884	0.679	4.91752e-299	GBM.new	SPP1	0.205	Lymphoid
HLA-DRB5	4.42603e-85	0.692813	0.445	0.29	8.58693e-81	GBM.new	HLA-DRB5	0.155	Lymphoid
G0S2	2.69749e-95	1.11826	0.286	0.139	5.23339e-91	GBM.new	G0S2	0.147	Lymphoid
CXCL8	5.6201e-80	0.932607	0.326	0.184	1.09035e-75	GBM.new	CXCL8	0.142	Lymphoid
FCGBP	2.05642e-67	0.676988	0.346	0.208	3.98967e-63	GBM.new	FCGBP	0.138	Lymphoid
HAMP	8.12167e-81	0.766792	0.259	0.131	1.57568e-76	GBM.new	HAMP	0.128	Lymphoid
S100A8	3.87607e-56	0.601978	0.253	0.143	7.51997e-52	GBM.new	S100A8	0.11	Lymphoid
IL1B	6.67145e-38	0.678304	0.394	0.297	1.29433e-33	GBM.new	IL1B	0.097	Lymphoid
PLTP	2.15209e-38	0.611599	0.288	0.196	4.17528e-34	GBM.new	PLTP	0.092	Lymphoid
OLR1	1.07156e-29	0.609725	0.336	0.251	2.07892e-25	GBM.new	OLR1	0.085	Lymphoid
PLAUR	4.45225e-29	0.683005	0.352	0.274	8.63781e-25	GBM.new	PLAUR	0.078	Lymphoid
CD163	4.75566e-26	0.637863	0.317	0.241	9.22646e-22	GBM.new	CD163	0.076	Lymphoid
HSPB1	6.88436e-22	0.590129	0.528	0.491	1.33564e-17	GBM.new	HSPB1	0.037	Lymphoid
MT-ND4L	6.59427e-74	-0.98666	0.557	0.702	1.27936e-69	GBM.new	MT-ND4L	-0.145	Lymphoid
MT-ATP8	2.15735e-63	-1.0344	0.318	0.479	4.18547e-59	GBM.new	MT-ATP8	-0.161	Lymphoid
IFITM1	6.04397e-137	-1.13333	0.13	0.358	1.17259e-132	GBM.new	IFITM1	-0.228	Lymphoid
G0S2	4.63889e-162	0.842525	0.531	0.366	8.99991e-158	GBM.new	G0S2	0.165	Myeloid-mono
CXCL3	3.5968e-126	0.871175	0.316	0.171	6.97814e-122	GBM.new	CXCL3	0.145	Myeloid-mono
CXCL8	2.05594e-159	0.874612	0.604	0.461	3.98872e-155	GBM.new	CXCL8	0.143	Myeloid-mono
CCL20	2.82367e-101	0.884448	0.325	0.195	5.47821e-97	GBM.new	CCL20	0.13	Myeloid-mono
CXCL2	1.34458e-63	0.648079	0.339	0.24	2.60862e-59	GBM.new	CXCL2	0.099	Myeloid-mono
FN1	3.98535e-49	0.799907	0.351	0.268	7.73198e-45	GBM.new	FN1	0.083	Myeloid-mono
MT1X	9.36544e-05	0.615212	0.386	0.401	1	GBM.new	MT1X	-0.015	Myeloid-mono
PLIN2	2.00045e-51	0.600273	0.669	0.704	3.88106e-47	GBM.new	PLIN2	-0.035	Myeloid-mono
CD74	0	-0.817308	0.878	0.954	0	GBM.new	CD74	-0.076	Myeloid-mono
LYZ	2.00526e-64	-0.720509	0.536	0.65	3.8904e-60	GBM.new	LYZ	-0.114	Myeloid-mono
AREG	3.9081e-72	-0.599873	0.265	0.39	7.58211e-68	GBM.new	AREG	-0.125	Myeloid-mono
ALDOA	6.17923e-87	-0.629919	0.336	0.463	1.19883e-82	GBM.new	ALDOA	-0.127	Myeloid-mono
GBP1	1.74324e-227	-0.589269	0.112	0.305	3.38206e-223	GBM.new	GBP1	-0.193	Myeloid-mono
HLA-DRB1	0	-0.79575	0.694	0.892	0	GBM.new	HLA-DRB1	-0.198	Myeloid-mono
MT-ND4L	6.53734e-291	-1.03272	0.527	0.751	1.26831e-286	GBM.new	MT-ND4L	-0.224	Myeloid-mono
HLA-C	0	-0.797099	0.662	0.888	0	GBM.new	HLA-C	-0.226	Myeloid-mono
ISG15	4.28042e-259	-1.03789	0.297	0.535	8.30444e-255	GBM.new	ISG15	-0.238	Myeloid-mono
IFI6	1.34589e-267	-0.903092	0.318	0.557	2.61116e-263	GBM.new	IFI6	-0.239	Myeloid-mono
IFITM3	5.94425e-300	-0.933556	0.431	0.67	1.15324e-295	GBM.new	IFITM3	-0.239	Myeloid-mono
GABARAP	1.97115e-289	-0.947862	0.346	0.59	3.82423e-285	GBM.new	GABARAP	-0.244	Myeloid-mono
MT-ATP8	3.79986e-269	-0.996297	0.309	0.56	7.37211e-265	GBM.new	MT-ATP8	-0.251	Myeloid-mono
IFI27	0	-1.7213	0.069	0.32	0	GBM.new	IFI27	-0.251	Myeloid-mono
LGALS3BP	0	-0.657792	0.214	0.468	0	GBM.new	LGALS3BP	-0.254	Myeloid-mono
HLA-DQA1	0	-0.772995	0.39	0.669	0	GBM.new	HLA-DQA1	-0.279	Myeloid-mono
LY6E	0	-0.94972	0.25	0.551	0	GBM.new	LY6E	-0.301	Myeloid-mono
G0S2	0	1.06217	0.418	0.259	0	GBM.new	G0S2	0.159	Myeloid-mphage-DC
SPP1	0	0.732183	0.978	0.896	0	GBM.new	SPP1	0.082	Myeloid-mphage-DC
S100A8	5.55233e-33	0.687804	0.256	0.247	1.07721e-28	GBM.new	S100A8	0.009	Myeloid-mphage-DC
HAMP	1.7036e-64	0.913374	0.343	0.343	3.30516e-60	GBM.new	HAMP	0	Myeloid-mphage-DC
CD74	0	-0.782135	0.893	0.989	0	GBM.new	CD74	-0.096	Myeloid-mphage-DC
SOCS3	1.72486e-15	0.632526	0.337	0.435	3.34639e-11	GBM.new	SOCS3	-0.098	Myeloid-mphage-DC
SOD2	4.39293e-47	0.66746	0.462	0.628	8.52272e-43	GBM.new	SOD2	-0.166	Myeloid-mphage-DC
PFKFB3	7.29956e-159	0.635413	0.34	0.508	1.41619e-154	GBM.new	PFKFB3	-0.168	Myeloid-mphage-DC
EEF1G	0	-0.619371	0.061	0.251	0	GBM.new	EEF1G	-0.19	Myeloid-mphage-DC
NAMPT	5.31287e-19	0.7459	0.531	0.735	1.03075e-14	GBM.new	NAMPT	-0.204	Myeloid-mphage-DC
LYZ	0	-0.81068	0.259	0.466	0	GBM.new	LYZ	-0.207	Myeloid-mphage-DC
MT-ND6	0	0.782887	0.284	0.507	0	GBM.new	MT-ND6	-0.223	Myeloid-mphage-DC
HLA-DRB1	0	-0.775361	0.708	0.966	0	GBM.new	HLA-DRB1	-0.258	Myeloid-mphage-DC
MT-ATP8	0	-0.806056	0.209	0.487	0	GBM.new	MT-ATP8	-0.278	Myeloid-mphage-DC
CALHM6	0	-0.604529	0.155	0.44	0	GBM.new	CALHM6	-0.285	Myeloid-mphage-DC
C1QC	0	-0.662812	0.626	0.921	0	GBM.new	C1QC	-0.295	Myeloid-mphage-DC
SERPING1	0	-0.591883	0.114	0.423	0	GBM.new	SERPING1	-0.309	Myeloid-mphage-DC
ISG15	0	-0.976819	0.179	0.503	0	GBM.new	ISG15	-0.324	Myeloid-mphage-DC
CH25H	0	-0.654093	0.227	0.552	0	GBM.new	CH25H	-0.325	Myeloid-mphage-DC
MT-ND4L	0	-0.989212	0.377	0.705	0	GBM.new	MT-ND4L	-0.328	Myeloid-mphage-DC
IFI27	0	-1.71629	0.07	0.406	0	GBM.new	IFI27	-0.336	Myeloid-mphage-DC
HLA-C	0	-0.799592	0.574	0.918	0	GBM.new	HLA-C	-0.344	Myeloid-mphage-DC
OLFML3	0	-0.601535	0.255	0.609	0	GBM.new	OLFML3	-0.354	Myeloid-mphage-DC
RPL17	0	-0.625659	0.303	0.66	0	GBM.new	RPL17	-0.357	Myeloid-mphage-DC
IFI6	0	-0.978024	0.195	0.559	0	GBM.new	IFI6	-0.364	Myeloid-mphage-DC
LY6E	0	-0.918795	0.145	0.511	0	GBM.new	LY6E	-0.366	Myeloid-mphage-DC
GABARAP	0	-0.921322	0.211	0.579	0	GBM.new	GABARAP	-0.368	Myeloid-mphage-DC
HLA-DQA1	0	-0.832619	0.47	0.844	0	GBM.new	HLA-DQA1	-0.374	Myeloid-mphage-DC
LGALS3BP	0	-0.771497	0.152	0.533	0	GBM.new	LGALS3BP	-0.381	Myeloid-mphage-DC
IFITM3	0	-0.875394	0.296	0.682	0	GBM.new	IFITM3	-0.386	Myeloid-mphage-DC
PDK4	0	-0.718124	0.231	0.625	0	GBM.new	PDK4	-0.394	Myeloid-mphage-DC
SPP1	2.52422e-95	0.898576	0.653	0.542	4.89724e-91	GBM.new	SPP1	0.111	Tumor-normal
MT1X	3.3019e-26	0.88194	0.275	0.205	6.40602e-22	GBM.new	MT1X	0.07	Tumor-normal
MT2A	1.7849e-22	0.743641	0.528	0.49	3.46288e-18	GBM.new	MT2A	0.038	Tumor-normal
MT-ATP8	8.85491e-27	-0.775183	0.185	0.264	1.71794e-22	GBM.new	MT-ATP8	-0.079	Tumor-normal
MT-ND4L	1.29477e-31	-0.665291	0.304	0.396	2.51198e-27	GBM.new	MT-ND4L	-0.092	Tumor-normal
MT-ND6	8.7921e-36	-0.83321	0.225	0.321	1.70575e-31	GBM.new	MT-ND6	-0.096	Tumor-normal
FOSB	7.96641e-48	-0.694037	0.269	0.382	1.54556e-43	GBM.new	FOSB	-0.113	Tumor-normal
CD74	2.84938e-94	-0.740428	0.516	0.664	5.52807e-90	GBM.new	CD74	-0.148	Tumor-normal
C1QB	1.94499e-84	-0.77574	0.323	0.483	3.77347e-80	GBM.new	C1QB	-0.16	Tumor-normal
C1QA	3.43685e-88	-0.803541	0.303	0.47	6.66783e-84	GBM.new	C1QA	-0.167	Tumor-normal
HLA-DRB1	1.09636e-100	-0.924708	0.247	0.424	2.12704e-96	GBM.new	HLA-DRB1	-0.177	Tumor-normal
LYZ	9.31316e-212	-2.19496	0.067	0.321	1.80685e-207	GBM.new	LYZ	-0.254	Tumor-normal
PDK4.1	1.74915e-69	0.897164	0.447	0.251	3.39353e-65	GBM.PD1	PDK4	0.196	Dying
ZFAND5.1	1.27252e-57	0.653161	0.512	0.34	2.46881e-53	GBM.PD1	ZFAND5	0.172	Dying
KCNMA1	8.41047e-46	0.59386	0.302	0.158	1.63171e-41	GBM.PD1	KCNMA1	0.144	Dying
NLRP3	7.45176e-42	0.699426	0.363	0.226	1.44572e-37	GBM.PD1	NLRP3	0.137	Dying
CH25H.1	9.21731e-29	0.626492	0.308	0.198	1.78825e-24	GBM.PD1	CH25H	0.11	Dying
CCL4L2	8.15779e-19	0.598116	0.459	0.371	1.58269e-14	GBM.PD1	CCL4L2	0.088	Dying
MTRNR2L12.1	3.23116e-05	-0.749329	0.466	0.48	0.626877	GBM.PD1	MTRNR2L12	-0.014	Dying
MTRNR2L8	8.17842e-30	-0.684049	0.188	0.303	1.5867e-25	GBM.PD1	MTRNR2L8	-0.115	Dying
HLA-DQA1.1	7.14846e-161	0.707599	0.417	0.283	1.38687e-156	GBM.PD1	HLA-DQA1	0.134	LowRead
VSIG4	1.12759e-121	-0.614235	0.188	0.314	2.18763e-117	GBM.PD1	VSIG4	-0.126	LowRead
S100A9.1	9.84999e-135	-0.759856	0.146	0.274	1.911e-130	GBM.PD1	S100A9	-0.128	LowRead
SPP1.1	0	-0.699821	0.768	0.909	0	GBM.PD1	SPP1	-0.141	LowRead
HSPA1B	1.75415e-33	-0.597899	0.594	0.61	3.40322e-29	GBM.PD1	HSPA1B	-0.016	Lymphoid
MT-ATP8.2	3.43149e-22	-0.627254	0.429	0.469	6.65743e-18	GBM.PD1	MT-ATP8	-0.04	Lymphoid
HSPA6	1.68716e-21	-0.670147	0.268	0.317	3.27326e-17	GBM.PD1	HSPA6	-0.049	Lymphoid
CXCL8.1	1.19477e-33	-0.644812	0.184	0.256	2.31798e-29	GBM.PD1	CXCL8	-0.072	Lymphoid
CD14	4.2087e-53	-0.697119	0.29	0.378	8.1653e-49	GBM.PD1	CD14	-0.088	Lymphoid
SPP1.1	6.24618e-225	-0.954724	0.665	0.802	1.21182e-220	GBM.PD1	SPP1	-0.137	Lymphoid
HLA-DRB5.1	4.10431e-241	-0.832643	0.224	0.461	7.96277e-237	GBM.PD1	HLA-DRB5	-0.237	Lymphoid
STAT1	0	0.719371	0.541	0.25	0	GBM.PD1	STAT1	0.291	Myeloid-mono
HLA-DQA1.1	0	0.751294	0.72	0.469	0	GBM.PD1	HLA-DQA1	0.251	Myeloid-mono
IRF1	2.23271e-271	0.616641	0.489	0.242	4.33169e-267	GBM.PD1	IRF1	0.247	Myeloid-mono
GBP5	0	0.643006	0.305	0.069	0	GBM.PD1	GBP5	0.236	Myeloid-mono
VAMP5	1.4534e-240	0.696972	0.52	0.29	2.81974e-236	GBM.PD1	VAMP5	0.23	Myeloid-mono
GBP1.1	6.95993e-276	0.792259	0.378	0.152	1.3503e-271	GBM.PD1	GBP1	0.226	Myeloid-mono
TIMP1	1.86384e-36	-0.605613	0.682	0.662	3.61604e-32	GBM.PD1	TIMP1	0.02	Myeloid-mono
FN1.1	0.00020309	-0.646804	0.302	0.306	1	GBM.PD1	FN1	-0.004	Myeloid-mono
HAMP	3.09544e-32	-0.694917	0.267	0.336	6.00546e-28	GBM.PD1	HAMP	-0.069	Myeloid-mono
CCL20.1	3.24032e-35	-0.681235	0.198	0.277	6.28655e-31	GBM.PD1	CCL20	-0.079	Myeloid-mono
G0S2.1	9.87836e-55	-0.73021	0.377	0.467	1.9165e-50	GBM.PD1	G0S2	-0.09	Myeloid-mono
VCAN	2.1249e-69	-0.761939	0.352	0.45	4.12252e-65	GBM.PD1	VCAN	-0.098	Myeloid-mono
CXCL8.1	4.08945e-74	-0.705644	0.451	0.556	7.93395e-70	GBM.PD1	CXCL8	-0.105	Myeloid-mono
CXCL3.1	9.18891e-99	-0.946862	0.137	0.279	1.78274e-94	GBM.PD1	CXCL3	-0.142	Myeloid-mono
PDK4.1	0	0.732384	0.678	0.316	0	GBM.PD1	PDK4	0.362	Myeloid-mphage-DC
CXCR4	0	0.592355	0.861	0.53	0	GBM.PD1	CXCR4	0.331	Myeloid-mphage-DC
CH25H.1	0	0.608728	0.604	0.293	0	GBM.PD1	CH25H	0.311	Myeloid-mphage-DC
HLA-DQA1.1	0	0.778473	0.865	0.565	0	GBM.PD1	HLA-DQA1	0.3	Myeloid-mphage-DC
CCL4L2	0	0.606294	0.681	0.452	0	GBM.PD1	CCL4L2	0.229	Myeloid-mphage-DC
DNAAF1	0	0.614706	0.279	0.07	0	GBM.PD1	DNAAF1	0.209	Myeloid-mphage-DC
HLA-DRB1.1	0	0.62897	0.968	0.779	0	GBM.PD1	HLA-DRB1	0.189	Myeloid-mphage-DC
SOD2.1	3.42521e-44	-0.604342	0.652	0.497	6.64526e-40	GBM.PD1	SOD2	0.155	Myeloid-mphage-DC
MT-ND6.1	1.02515e-21	-0.795781	0.463	0.369	1.9889e-17	GBM.PD1	MT-ND6	0.094	Myeloid-mphage-DC
PLTP	5.62171e-59	-0.694201	0.453	0.44	1.09067e-54	GBM.PD1	PLTP	0.013	Myeloid-mphage-DC
S100A8.1	5.32922e-27	-0.603467	0.242	0.256	1.03392e-22	GBM.PD1	S100A8	-0.014	Myeloid-mphage-DC
S100A9	2.11393e-42	-0.63243	0.308	0.322	4.10124e-38	GBM.PD1	S100A9	-0.014	Myeloid-mphage-DC
HAMP.1	2.40222e-200	-1.01305	0.301	0.363	4.66054e-196	GBM.PD1	HAMP	-0.062	Myeloid-mphage-DC
SPP1.1	0	-0.736272	0.884	0.961	0	GBM.PD1	SPP1	-0.077	Myeloid-mphage-DC
G0S2.2	2.0138e-233	-0.764806	0.28	0.364	3.90698e-229	GBM.PD1	G0S2	-0.084	Myeloid-mphage-DC
CKB	1.97723e-260	0.611788	0.455	0.196	3.83603e-256	GBM.PD1	CKB	0.259	Tumor-normal
TUBA1A	9.97723e-222	0.623711	0.569	0.334	1.93568e-217	GBM.PD1	TUBA1A	0.235	Tumor-normal
CHCHD2.1	1.19388e-145	0.883225	0.6	0.392	2.31625e-141	GBM.PD1	CHCHD2	0.208	Tumor-normal
NIPSNAP2.1	2.939e-153	1.06715	0.318	0.161	5.70196e-149	GBM.PD1	NIPSNAP2	0.157	Tumor-normal
CCT6A.1	1.96461e-118	0.696772	0.388	0.234	3.81154e-114	GBM.PD1	CCT6A	0.154	Tumor-normal
EGFR	1.21618e-114	0.770698	0.273	0.137	2.35952e-110	GBM.PD1	EGFR	0.136	Tumor-normal
CNP	6.46307e-82	0.592962	0.263	0.151	1.2539e-77	GBM.PD1	CNP	0.112	Tumor-normal
S100A4	4.05015e-66	0.708066	0.292	0.185	7.85769e-62	GBM.PD1	S100A4	0.107	Tumor-normal
DCTN2	0.00050606	-0.59112	0.275	0.223	1	GBM.PD1	DCTN2	0.052	Tumor-normal
GLUL.1	7.11757e-17	-0.700615	0.433	0.437	1.38088e-12	GBM.PD1	GLUL	-0.004	Tumor-normal
NAMPT	0.000999415	-0.599601	0.258	0.264	1	GBM.PD1	NAMPT	-0.006	Tumor-normal
ZFP36L1	5.22531e-06	-0.595226	0.305	0.313	0.101376	GBM.PD1	ZFP36L1	-0.008	Tumor-normal
TIMP1	4.65493e-19	-0.678174	0.406	0.416	9.03102e-15	GBM.PD1	TIMP1	-0.01	Tumor-normal
LAPTM5.1	3.09289e-09	-0.61628	0.241	0.264	6.00051e-05	GBM.PD1	LAPTM5	-0.023	Tumor-normal
CEBPD	6.54263e-13	-0.647513	0.264	0.291	1.26934e-08	GBM.PD1	CEBPD	-0.027	Tumor-normal
MT-ATP8.2	4.64623e-13	-0.621841	0.227	0.259	9.01414e-09	GBM.PD1	MT-ATP8	-0.032	Tumor-normal
MT-ND6.2	1.39469e-31	-1.10507	0.265	0.321	2.70584e-27	GBM.PD1	MT-ND6	-0.056	Tumor-normal
FOSB.2	6.46947e-40	-0.80534	0.322	0.379	1.25514e-35	GBM.PD1	FOSB	-0.057	Tumor-normal
HLA-DRB1.2	5.04784e-36	-0.615045	0.349	0.41	9.79332e-32	GBM.PD1	HLA-DRB1	-0.061	Tumor-normal
CTSL.1	1.60649e-40	-1.09978	0.196	0.26	3.11675e-36	GBM.PD1	CTSL	-0.064	Tumor-normal
SAT1	4.38764e-107	-0.647171	0.557	0.628	8.51247e-103	GBM.PD1	SAT1	-0.071	Tumor-normal
C1QA.2	8.95392e-70	-0.806621	0.379	0.467	1.73715e-65	GBM.PD1	C1QA	-0.088	Tumor-normal
HLA-DRA.1	2.70748e-107	-0.832243	0.496	0.584	5.25278e-103	GBM.PD1	HLA-DRA	-0.088	Tumor-normal
SRGN.1	9.13153e-71	-0.816656	0.318	0.418	1.77161e-66	GBM.PD1	SRGN	-0.1	Tumor-normal
C1QB.2	7.83608e-103	-0.858587	0.375	0.493	1.52028e-98	GBM.PD1	C1QB	-0.118	Tumor-normal
LYZ.2	0	-2.0103	0.093	0.369	0	GBM.PD1	LYZ	-0.276	Tumor-normal
IFI27	6.42059e-167	1.60037	0.331	0.078	1.24566e-162	GBM.rec	IFI27	0.253	Dying
C1QC	1.81289e-102	0.685733	0.681	0.433	3.51719e-98	GBM.rec	C1QC	0.248	Dying
ISG15	1.49555e-125	1.43372	0.312	0.093	2.90151e-121	GBM.rec	ISG15	0.219	Dying
MT-ATP8.1	1.73898e-84	1.07805	0.485	0.267	3.37379e-80	GBM.rec	MT-ATP8	0.218	Dying
IFITM3	1.73225e-93	0.839941	0.325	0.119	3.36075e-89	GBM.rec	IFITM3	0.206	Dying
MT-ND6	3.36392e-57	0.625784	0.462	0.277	6.52635e-53	GBM.rec	MT-ND6	0.185	Dying
IFI6	8.51014e-90	1.00935	0.254	0.08	1.65105e-85	GBM.rec	IFI6	0.174	Dying
MT-ND4L.1	2.23053e-61	0.970921	0.625	0.463	4.32744e-57	GBM.rec	MT-ND4L	0.162	Dying
MTRNR2L12	5.21532e-17	0.827094	0.531	0.45	1.01182e-12	GBM.rec	MTRNR2L12	0.081	Dying
IFI27.1	0	1.7835	0.353	0.128	0	GBM.rec	IFI27	0.225	LowRead
IFITM3.1	1.62647e-303	0.885618	0.408	0.193	3.15552e-299	GBM.rec	IFITM3	0.215	LowRead
ISG15	0	1.36344	0.333	0.132	0	GBM.rec	ISG15	0.201	LowRead
IFI6.1	9.02129e-296	1.11952	0.33	0.141	1.75022e-291	GBM.rec	IFI6	0.189	LowRead
MT-ND4L.1	2.12537e-201	0.804021	0.393	0.218	4.12344e-197	GBM.rec	MT-ND4L	0.175	LowRead
C1QC	3.29369e-293	0.633796	0.736	0.562	6.39008e-289	GBM.rec	C1QC	0.174	LowRead
GABARAP	1.03726e-214	0.718788	0.298	0.133	2.01238e-210	GBM.rec	GABARAP	0.165	LowRead
LY6E	1.26009e-228	0.85038	0.263	0.106	2.44469e-224	GBM.rec	LY6E	0.157	LowRead
MT-ATP8	7.82315e-159	0.721539	0.296	0.151	1.51777e-154	GBM.rec	MT-ATP8	0.145	LowRead
IL1B.1	1.36317e-76	-0.641637	0.206	0.309	2.6447e-72	GBM.rec	IL1B	-0.103	LowRead
MT-ATP8.1	7.45898e-180	1.28254	0.62	0.4	1.44712e-175	GBM.rec	MT-ATP8	0.22	Lymphoid
IFITM1.1	1.19843e-104	0.654218	0.456	0.273	2.32507e-100	GBM.rec	IFITM1	0.183	Lymphoid
MT-ND4L.1	3.36771e-107	0.853436	0.756	0.65	6.53369e-103	GBM.rec	MT-ND4L	0.106	Lymphoid
IFITM3	3.72105e-36	0.633901	0.375	0.285	7.21922e-32	GBM.rec	IFITM3	0.09	Lymphoid
GNLY	1.58975e-08	0.614202	0.264	0.229	0.000308428	GBM.rec	GNLY	0.035	Lymphoid
ATP6V0C	0	0.667249	0.31	0.065	0	GBM.rec	ATP6V0C	0.245	Myeloid-mono
MT-ATP8.1	1.00796e-263	1.23335	0.62	0.388	1.95555e-259	GBM.rec	MT-ATP8	0.232	Myeloid-mono
NME2	7.54789e-282	0.714755	0.329	0.107	1.46437e-277	GBM.rec	NME2	0.222	Myeloid-mono
GABARAP.1	1.82648e-187	0.725859	0.618	0.433	3.54356e-183	GBM.rec	GABARAP	0.185	Myeloid-mono
IFITM3.1	9.03044e-150	0.683036	0.691	0.519	1.752e-145	GBM.rec	IFITM3	0.172	Myeloid-mono
LY6E.1	4.00317e-132	0.789787	0.541	0.373	7.76656e-128	GBM.rec	LY6E	0.168	Myeloid-mono
ALDOA.1	1.32608e-118	0.691439	0.524	0.365	2.57273e-114	GBM.rec	ALDOA	0.159	Myeloid-mono
MT-ND4L.1	3.84119e-186	1.0328	0.761	0.612	7.4523e-182	GBM.rec	MT-ND4L	0.149	Myeloid-mono
IFI6.1	4.14364e-79	0.906758	0.537	0.419	8.03908e-75	GBM.rec	IFI6	0.118	Myeloid-mono
IFI27.1	2.01272e-85	1.69827	0.289	0.178	3.90487e-81	GBM.rec	IFI27	0.111	Myeloid-mono
C1QC	1.29826e-146	0.68836	0.788	0.69	2.51876e-142	GBM.rec	C1QC	0.098	Myeloid-mono
LGALS3BP.1	1.25616e-57	0.591541	0.426	0.329	2.43708e-53	GBM.rec	LGALS3BP	0.097	Myeloid-mono
ISG15.1	3.73487e-56	1.23935	0.494	0.405	7.24603e-52	GBM.rec	ISG15	0.089	Myeloid-mono
LYZ.1	1.6545e-25	0.925412	0.624	0.59	3.20989e-21	GBM.rec	LYZ	0.034	Myeloid-mono
MTRNR2L12	6.17614e-18	0.70701	0.545	0.517	1.19823e-13	GBM.rec	MTRNR2L12	0.028	Myeloid-mono
RPS29	2.17305e-212	-0.610223	0.804	0.835	4.21593e-208	GBM.rec	RPS29	-0.031	Myeloid-mono
RPL36A	9.09691e-93	-0.628271	0.642	0.697	1.76489e-88	GBM.rec	RPL36A	-0.055	Myeloid-mono
MT-ATP8.1	0	1.33798	0.608	0.294	0	GBM.rec	MT-ATP8	0.314	Myeloid-mphage-DC
IFITM3.1	0	0.776191	0.736	0.44	0	GBM.rec	IFITM3	0.296	Myeloid-mphage-DC
GABARAP.1	0	0.876597	0.61	0.352	0	GBM.rec	GABARAP	0.258	Myeloid-mphage-DC
LY6E.1	0	0.807742	0.536	0.287	0	GBM.rec	LY6E	0.249	Myeloid-mphage-DC
IFI6.1	0	0.965659	0.576	0.339	0	GBM.rec	IFI6	0.237	Myeloid-mphage-DC
ATP6V0C	0	0.74695	0.289	0.056	0	GBM.rec	ATP6V0C	0.233	Myeloid-mphage-DC
MT-ND4L.1	0	1.17099	0.733	0.504	0	GBM.rec	MT-ND4L	0.229	Myeloid-mphage-DC
NME2	0	0.726946	0.298	0.074	0	GBM.rec	NME2	0.224	Myeloid-mphage-DC
LGALS3BP.1	0	0.638169	0.523	0.309	0	GBM.rec	LGALS3BP	0.214	Myeloid-mphage-DC
ISG15.1	0	1.16876	0.504	0.31	0	GBM.rec	ISG15	0.194	Myeloid-mphage-DC
C1QC.1	0	0.604353	0.928	0.744	0	GBM.rec	C1QC	0.184	Myeloid-mphage-DC
EEF1G.1	0	0.640443	0.287	0.129	0	GBM.rec	EEF1G	0.158	Myeloid-mphage-DC
IFIT1	0	0.622441	0.252	0.096	0	GBM.rec	IFIT1	0.156	Myeloid-mphage-DC
IFI27.1	0	1.61626	0.369	0.215	0	GBM.rec	IFI27	0.154	Myeloid-mphage-DC
LYZ.1	1.33512e-196	1.13901	0.468	0.343	2.59027e-192	GBM.rec	LYZ	0.125	Myeloid-mphage-DC
G0S2.1	2.2522e-285	-0.919694	0.224	0.362	4.3695e-281	GBM.rec	G0S2	-0.138	Myeloid-mphage-DC
LYZ.1	0	2.49186	0.516	0.083	0	GBM.rec	LYZ	0.433	Tumor-normal
KRT17	0	2.32569	0.255	0.012	0	GBM.rec	KRT17	0.243	Tumor-normal
C1QB.1	1.80988e-298	1.12344	0.575	0.356	3.51135e-294	GBM.rec	C1QB	0.219	Tumor-normal
AC103591.3	0	1.8164	0.256	0.05	0	GBM.rec	AC103591.3	0.206	Tumor-normal
C1QA.1	3.11469e-246	1.09674	0.547	0.352	6.0428e-242	GBM.rec	C1QA	0.195	Tumor-normal
CD74.1	0	0.807315	0.736	0.557	0	GBM.rec	CD74	0.179	Tumor-normal
HLA-DRB1.1	2.10859e-193	0.995443	0.489	0.312	4.09088e-189	GBM.rec	HLA-DRB1	0.177	Tumor-normal
HLA-DRA	7.16008e-275	0.988702	0.653	0.477	1.38913e-270	GBM.rec	HLA-DRA	0.176	Tumor-normal
CD163	9.60904e-213	1.387	0.268	0.095	1.86425e-208	GBM.rec	CD163	0.173	Tumor-normal
CD14	1.56359e-145	1.14529	0.282	0.135	3.03352e-141	GBM.rec	CD14	0.147	Tumor-normal
SRGN	2.78162e-116	0.797025	0.457	0.324	5.39662e-112	GBM.rec	SRGN	0.133	Tumor-normal
FOSB.1	1.29643e-135	1.04594	0.433	0.302	2.51521e-131	GBM.rec	FOSB	0.131	Tumor-normal
DDIT3	1.3373e-122	1.33893	0.283	0.16	2.59449e-118	GBM.rec	DDIT3	0.123	Tumor-normal
HLA-DQB1	9.27893e-104	1.0763	0.264	0.143	1.80021e-99	GBM.rec	HLA-DQB1	0.121	Tumor-normal
MT-ND6.1	1.1406e-103	1.32756	0.368	0.251	2.21287e-99	GBM.rec	MT-ND6	0.117	Tumor-normal
SLC2A3	3.85943e-97	1.10708	0.256	0.142	7.48767e-93	GBM.rec	SLC2A3	0.114	Tumor-normal
HLA-DPA1	5.6659e-79	0.672479	0.395	0.284	1.09924e-74	GBM.rec	HLA-DPA1	0.111	Tumor-normal
MT-ND3	0	0.699164	0.87	0.776	0	GBM.rec	MT-ND3	0.094	Tumor-normal
HLA-DPB1	2.66111e-55	0.624945	0.363	0.271	5.16282e-51	GBM.rec	HLA-DPB1	0.092	Tumor-normal
GLUL	6.31774e-85	0.85748	0.485	0.398	1.22571e-80	GBM.rec	GLUL	0.087	Tumor-normal
MT-ATP8.1	2.00109e-56	0.940315	0.295	0.212	3.88231e-52	GBM.rec	MT-ATP8	0.083	Tumor-normal
CTSL	2.00879e-67	1.12846	0.284	0.202	3.89725e-63	GBM.rec	CTSL	0.082	Tumor-normal
FCER1G	5.15408e-49	0.784868	0.272	0.192	9.99943e-45	GBM.rec	FCER1G	0.08	Tumor-normal
TYROBP	7.13541e-44	0.675995	0.326	0.251	1.38434e-39	GBM.rec	TYROBP	0.075	Tumor-normal
LAPTM5	4.16823e-35	0.710381	0.292	0.228	8.08678e-31	GBM.rec	LAPTM5	0.064	Tumor-normal
CEBPB	9.89161e-34	0.694348	0.259	0.196	1.91907e-29	GBM.rec	CEBPB	0.063	Tumor-normal
CTSB	2.09019e-49	0.596195	0.463	0.404	4.05517e-45	GBM.rec	CTSB	0.059	Tumor-normal
TXNIP	5.694e-29	0.692571	0.296	0.24	1.10469e-24	GBM.rec	TXNIP	0.056	Tumor-normal
C1QC	3.79821e-22	0.640774	0.275	0.229	7.36891e-18	GBM.rec	C1QC	0.046	Tumor-normal
GRN	7.52814e-15	0.742781	0.307	0.274	1.46053e-10	GBM.rec	GRN	0.033	Tumor-normal
ATP1B3	1.42871e-13	0.695333	0.299	0.275	2.77184e-09	GBM.rec	ATP1B3	0.024	Tumor-normal
CDK4	1.03422e-13	0.805232	0.253	0.237	2.00649e-09	GBM.rec	CDK4	0.016	Tumor-normal
VMP1	7.56431e-05	0.601857	0.274	0.275	1	GBM.rec	VMP1	-0.001	Tumor-normal
OS9	1.91112e-05	0.60588	0.252	0.254	0.370777	GBM.rec	OS9	-0.002	Tumor-normal
MT-ND4L.1	3.26554e-11	0.615321	0.374	0.378	6.33548e-07	GBM.rec	MT-ND4L	-0.004	Tumor-normal
NIPSNAP2	7.39197e-79	-0.818143	0.155	0.265	1.43412e-74	GBM.rec	NIPSNAP2	-0.11	Tumor-normal
CCT6A	1.44311e-73	-0.592314	0.22	0.342	2.79978e-69	GBM.rec	CCT6A	-0.122	Tumor-normal
PTPRZ1	1.30439e-148	-1.00286	0.102	0.258	2.53066e-144	GBM.rec	PTPRZ1	-0.156	Tumor-normal
NDUFB2	1.80026e-99	-0.600413	0.295	0.46	3.49268e-95	GBM.rec	NDUFB2	-0.165	Tumor-normal
RPS17	6.95053e-149	-0.738344	0.19	0.359	1.34847e-144	GBM.rec	RPS17	-0.169	Tumor-normal
PTN	2.18307e-151	-0.866228	0.179	0.35	4.23537e-147	GBM.rec	PTN	-0.171	Tumor-normal
METRN	7.29357e-177	-0.59205	0.091	0.264	1.41502e-172	GBM.rec	METRN	-0.173	Tumor-normal
GAP43	6.35591e-186	-0.737043	0.085	0.259	1.23311e-181	GBM.rec	GAP43	-0.174	Tumor-normal
MT1X.1	7.893e-159	-0.621992	0.119	0.295	1.53132e-154	GBM.rec	MT1X	-0.176	Tumor-normal
S100A16	5.4958e-180	-0.712558	0.098	0.275	1.06624e-175	GBM.rec	S100A16	-0.177	Tumor-normal
RPL36A	5.28749e-156	-0.658394	0.216	0.394	1.02583e-151	GBM.rec	RPL36A	-0.178	Tumor-normal
CLU	1.2344e-171	-0.61451	0.212	0.405	2.39486e-167	GBM.rec	CLU	-0.193	Tumor-normal
MT2A.1	3.78985e-161	-0.802033	0.387	0.581	7.35269e-157	GBM.rec	MT2A	-0.194	Tumor-normal
HSPB1	2.52846e-169	-0.724569	0.31	0.506	4.90546e-165	GBM.rec	HSPB1	-0.196	Tumor-normal
CHCHD2	4.44124e-142	-0.802993	0.352	0.555	8.61645e-138	GBM.rec	CHCHD2	-0.203	Tumor-normal
MT3	1.13317e-208	-0.874214	0.126	0.336	2.19846e-204	GBM.rec	MT3	-0.21	Tumor-normal
