# Supplementary material for: Neoadjuvant PD-1 blockade induces T cell and cDC1 activation but fails to overcome the immunosuppressive tumor associated macrophages in recurrent glioblastoma
Source: Research Square preprint supplement (doi:10.21203/rs.3.rs-793187/v1), 2021-08-13
Supplement: Supplementary file 3 [file SuppTable3-scRNAseq-Lymphoid.xlsx]

## Sheet: Markers
Gene	p_val	avg_logFC	pct.1	pct.2	p_val_adj	cluster	gene
CCL5	1.16984e-276	0.815012	0.894	0.701	1.70855e-272	L1-GZMK.CD8A.T	CCL5
GZMK	9.29265e-210	0.862829	0.71	0.457	1.35719e-205	L1-GZMK.CD8A.T	GZMK
NKG7	9.17245e-188	0.62294	0.786	0.535	1.33964e-183	L1-GZMK.CD8A.T	NKG7
GZMA	5.64032e-185	0.727023	0.784	0.566	8.23769e-181	L1-GZMK.CD8A.T	GZMA
CD8A	7.52546e-177	0.84015	0.611	0.357	1.09909e-172	L1-GZMK.CD8A.T	CD8A
GZMH	7.67886e-150	0.778026	0.617	0.394	1.1215e-145	L1-GZMK.CD8A.T	GZMH
CD8B	3.43737e-126	0.729777	0.489	0.281	5.02028e-122	L1-GZMK.CD8A.T	CD8B
CD3D	4.26927e-125	0.462684	0.806	0.65	6.23527e-121	L1-GZMK.CD8A.T	CD3D
CST7	9.38315e-113	0.553621	0.725	0.572	1.37041e-108	L1-GZMK.CD8A.T	CST7
RARRES3	2.60689e-99	0.51548	0.714	0.6	3.80737e-95	L1-GZMK.CD8A.T	RARRES3
IL32	1.35026e-96	0.352102	0.889	0.739	1.97206e-92	L1-GZMK.CD8A.T	IL32
CD2	7.51234e-88	0.396653	0.798	0.675	1.09718e-83	L1-GZMK.CD8A.T	CD2
CD3E	6.47914e-82	0.446377	0.769	0.646	9.46278e-78	L1-GZMK.CD8A.T	CD3E
PTPRC	8.29849e-81	0.347304	0.858	0.794	1.21199e-76	L1-GZMK.CD8A.T	PTPRC
CD3G	2.45685e-79	0.462513	0.641	0.512	3.58823e-75	L1-GZMK.CD8A.T	CD3G
APOBEC3G	1.32276e-72	0.511384	0.586	0.475	1.9319e-68	L1-GZMK.CD8A.T	APOBEC3G
LCP1	1.09299e-71	0.347851	0.752	0.663	1.59631e-67	L1-GZMK.CD8A.T	LCP1
GZMM	5.28246e-67	0.464054	0.561	0.435	7.71504e-63	L1-GZMK.CD8A.T	GZMM
HCST	2.5608e-62	0.334819	0.81	0.728	3.74005e-58	L1-GZMK.CD8A.T	HCST
GIMAP7	1.93815e-58	0.444133	0.576	0.472	2.83066e-54	L1-GZMK.CD8A.T	GIMAP7
CTSW	6.3337e-54	0.358779	0.569	0.436	9.25037e-50	L1-GZMK.CD8A.T	CTSW
KIAA1551	2.18423e-51	0.420093	0.621	0.535	3.19007e-47	L1-GZMK.CD8A.T	KIAA1551
CD52	4.12846e-50	0.338084	0.805	0.705	6.02961e-46	L1-GZMK.CD8A.T	CD52
SH2D1A	8.32766e-48	0.433062	0.448	0.338	1.21625e-43	L1-GZMK.CD8A.T	SH2D1A
TRBC2	2.19728e-45	0.359727	0.692	0.601	3.20913e-41	L1-GZMK.CD8A.T	TRBC2
IKZF3	1.5326e-43	0.344491	0.531	0.429	2.23836e-39	L1-GZMK.CD8A.T	IKZF3
TC2N	1.65846e-37	0.367847	0.422	0.318	2.42217e-33	L1-GZMK.CD8A.T	TC2N
CD27	6.87982e-37	0.427017	0.478	0.387	1.0048e-32	L1-GZMK.CD8A.T	CD27
LAG3	1.38754e-36	0.423693	0.394	0.294	2.02651e-32	L1-GZMK.CD8A.T	LAG3
CRTAM	2.38738e-36	0.52395	0.278	0.181	3.48677e-32	L1-GZMK.CD8A.T	CRTAM
GIMAP4	2.33211e-34	0.356611	0.527	0.465	3.40604e-30	L1-GZMK.CD8A.T	GIMAP4
ITM2C	4.37824e-34	0.464065	0.419	0.333	6.39442e-30	L1-GZMK.CD8A.T	ITM2C
CLEC2B	2.46476e-32	0.324629	0.587	0.528	3.59979e-28	L1-GZMK.CD8A.T	CLEC2B
THEMIS	3.34898e-32	0.343738	0.307	0.214	4.89119e-28	L1-GZMK.CD8A.T	THEMIS
SLFN5	6.56654e-32	0.382551	0.464	0.38	9.59043e-28	L1-GZMK.CD8A.T	SLFN5
F2R	2.26713e-30	0.36763	0.296	0.208	3.31114e-26	L1-GZMK.CD8A.T	F2R
PYHIN1	2.48211e-28	0.336553	0.436	0.354	3.62512e-24	L1-GZMK.CD8A.T	PYHIN1
DUSP2	6.63204e-28	0.395658	0.683	0.647	9.68609e-24	L1-GZMK.CD8A.T	DUSP2
KLRG1	4.76123e-25	0.384918	0.265	0.187	6.95377e-21	L1-GZMK.CD8A.T	KLRG1
LYST	5.29975e-24	0.335102	0.433	0.373	7.74028e-20	L1-GZMK.CD8A.T	LYST
GIMAP1	3.4965e-23	0.339451	0.383	0.322	5.10665e-19	L1-GZMK.CD8A.T	GIMAP1
STAT1	4.95736e-18	0.337274	0.466	0.433	7.24023e-14	L1-GZMK.CD8A.T	STAT1
GBP1	1.48164e-15	0.382088	0.362	0.317	2.16394e-11	L1-GZMK.CD8A.T	GBP1
IFITM1	1.44568e-07	0.438563	0.34	0.305	0.00211141	L1-GZMK.CD8A.T	IFITM1
PLCG2	0.00387287	0.337132	0.349	0.345	1	L1-GZMK.CD8A.T	PLCG2
IL7R	1.33736e-239	1.01666	0.71	0.455	1.95321e-235	L2-IL7R-CD69-CD40L.T	IL7R
ANXA1	1.31669e-172	0.797344	0.764	0.582	1.92303e-168	L2-IL7R-CD69-CD40L.T	ANXA1
BTG1	4.53454e-151	0.397593	0.952	0.896	6.62269e-147	L2-IL7R-CD69-CD40L.T	BTG1
CD69	2.34924e-135	0.667711	0.787	0.656	3.43107e-131	L2-IL7R-CD69-CD40L.T	CD69
TSC22D3	1.10264e-120	0.456809	0.903	0.823	1.61041e-116	L2-IL7R-CD69-CD40L.T	TSC22D3
ZFP36L2	1.67631e-116	0.464226	0.903	0.854	2.44825e-112	L2-IL7R-CD69-CD40L.T	ZFP36L2
TNFAIP3	2.24253e-104	0.51728	0.83	0.711	3.27522e-100	L2-IL7R-CD69-CD40L.T	TNFAIP3
VIM	3.32593e-102	0.406109	0.877	0.799	4.85752e-98	L2-IL7R-CD69-CD40L.T	VIM
TXNIP	1.64581e-96	0.455097	0.858	0.787	2.40371e-92	L2-IL7R-CD69-CD40L.T	TXNIP
CD40LG	1.1484e-94	0.596306	0.256	0.114	1.67724e-90	L2-IL7R-CD69-CD40L.T	CD40LG
TOB1	9.92705e-88	0.70363	0.497	0.359	1.44985e-83	L2-IL7R-CD69-CD40L.T	TOB1
JUNB	2.03864e-86	0.37458	0.917	0.832	2.97743e-82	L2-IL7R-CD69-CD40L.T	JUNB
CXCR4	1.00536e-84	0.377369	0.893	0.829	1.46833e-80	L2-IL7R-CD69-CD40L.T	CXCR4
JUN	6.39498e-79	0.423176	0.886	0.789	9.33987e-75	L2-IL7R-CD69-CD40L.T	JUN
SARAF	1.0009e-77	0.350997	0.849	0.784	1.46181e-73	L2-IL7R-CD69-CD40L.T	SARAF
RORA	9.22414e-76	0.52649	0.515	0.38	1.34719e-71	L2-IL7R-CD69-CD40L.T	RORA
CD521	4.1746e-72	0.389376	0.787	0.707	6.097e-68	L2-IL7R-CD69-CD40L.T	CD52
KLF6	2.58867e-63	0.344937	0.862	0.767	3.78075e-59	L2-IL7R-CD69-CD40L.T	KLF6
S100A4	6.71203e-63	0.328889	0.822	0.738	9.80292e-59	L2-IL7R-CD69-CD40L.T	S100A4
SPOCK2	1.30634e-55	0.328103	0.611	0.507	1.90792e-51	L2-IL7R-CD69-CD40L.T	SPOCK2
JUND	1.545e-52	0.367765	0.792	0.709	2.25647e-48	L2-IL7R-CD69-CD40L.T	JUND
STK17B	2.30284e-52	0.341509	0.692	0.628	3.36329e-48	L2-IL7R-CD69-CD40L.T	STK17B
PTGER4	2.97491e-52	0.432643	0.515	0.421	4.34486e-48	L2-IL7R-CD69-CD40L.T	PTGER4
LEPROTL1	2.97707e-52	0.345429	0.667	0.596	4.34801e-48	L2-IL7R-CD69-CD40L.T	LEPROTL1
CRYBG1	4.42018e-48	0.456565	0.509	0.411	6.45567e-44	L2-IL7R-CD69-CD40L.T	CRYBG1
AHNAK	1.01747e-47	0.402605	0.567	0.477	1.48602e-43	L2-IL7R-CD69-CD40L.T	AHNAK
LTB	6.09083e-43	0.359857	0.554	0.455	8.89565e-39	L2-IL7R-CD69-CD40L.T	LTB
CD55	1.88062e-39	0.422525	0.454	0.371	2.74665e-35	L2-IL7R-CD69-CD40L.T	CD55
CREM	9.33352e-38	0.378402	0.649	0.581	1.36316e-33	L2-IL7R-CD69-CD40L.T	CREM
SLC2A3	3.86631e-37	0.338517	0.622	0.553	5.64675e-33	L2-IL7R-CD69-CD40L.T	SLC2A3
CDC14A	5.76857e-37	0.436164	0.327	0.237	8.425e-33	L2-IL7R-CD69-CD40L.T	CDC14A
KLRB1	2.96159e-35	0.5967	0.393	0.304	4.3254e-31	L2-IL7R-CD69-CD40L.T	KLRB1
PDE4D	6.92404e-32	0.473591	0.354	0.275	1.01126e-27	L2-IL7R-CD69-CD40L.T	PDE4D
FKBP11	1.33994e-28	0.362128	0.351	0.277	1.95698e-24	L2-IL7R-CD69-CD40L.T	FKBP11
ANKRD28	2.16983e-20	0.402897	0.257	0.197	3.16904e-16	L2-IL7R-CD69-CD40L.T	ANKRD28
GPR171	1.30006e-19	0.367694	0.362	0.305	1.89874e-15	L2-IL7R-CD69-CD40L.T	GPR171
RCAN3	1.63382e-19	0.323527	0.349	0.299	2.3862e-15	L2-IL7R-CD69-CD40L.T	RCAN3
BCL2	2.53464e-17	0.340767	0.379	0.337	3.70184e-13	L2-IL7R-CD69-CD40L.T	BCL2
DNAJB1	1.59644e-16	0.343194	0.807	0.746	2.3316e-12	L2-IL7R-CD69-CD40L.T	DNAJB1
LMNA	1.37622e-13	0.436525	0.346	0.309	2.00997e-09	L2-IL7R-CD69-CD40L.T	LMNA
HIST1H1D	3.07168e-09	0.377064	0.277	0.244	4.48619e-05	L2-IL7R-CD69-CD40L.T	HIST1H1D
BHLHE40	9.40894e-09	0.340797	0.325	0.308	0.000137418	L2-IL7R-CD69-CD40L.T	BHLHE40
BRD1	2.00876e-106	0.362509	0.615	0.219	2.93379e-102	L3-IL7R-TOX-TCF7.T	BRD1
MIAT	2.0539e-104	0.438585	0.559	0.196	2.99973e-100	L3-IL7R-TOX-TCF7.T	MIAT
TCF7	8.5939e-103	0.329748	0.538	0.177	1.25514e-98	L3-IL7R-TOX-TCF7.T	TCF7
GPR1711	2.60656e-86	0.378824	0.689	0.297	3.80689e-82	L3-IL7R-TOX-TCF7.T	GPR171
RIF1	4.36584e-82	0.341252	0.636	0.269	6.37631e-78	L3-IL7R-TOX-TCF7.T	RIF1
CREBRF	7.97328e-79	0.324875	0.68	0.304	1.1645e-74	L3-IL7R-TOX-TCF7.T	CREBRF
KMT2A	5.38476e-78	0.379988	0.758	0.386	7.86444e-74	L3-IL7R-TOX-TCF7.T	KMT2A
BOD1L1	9.68485e-77	0.406204	0.716	0.36	1.41447e-72	L3-IL7R-TOX-TCF7.T	BOD1L1
FAM129A	1.15817e-76	0.376943	0.757	0.397	1.69151e-72	L3-IL7R-TOX-TCF7.T	FAM129A
GCC2	2.19429e-75	0.425432	0.818	0.466	3.20477e-71	L3-IL7R-TOX-TCF7.T	GCC2
BCL11B	6.91094e-75	0.325613	0.715	0.328	1.00934e-70	L3-IL7R-TOX-TCF7.T	BCL11B
KLF13	3.21915e-72	0.37197	0.735	0.366	4.70156e-68	L3-IL7R-TOX-TCF7.T	KLF13
RIPOR2	9.18281e-72	0.370213	0.689	0.328	1.34115e-67	L3-IL7R-TOX-TCF7.T	RIPOR2
SYNE2	1.20953e-71	0.546214	0.835	0.518	1.76652e-67	L3-IL7R-TOX-TCF7.T	SYNE2
KIAA15511	3.30235e-71	0.487258	0.852	0.534	4.82309e-67	L3-IL7R-TOX-TCF7.T	KIAA1551
ZNF292	4.30859e-71	0.344762	0.727	0.364	6.2927e-67	L3-IL7R-TOX-TCF7.T	ZNF292
PPP1R14B	1.04651e-70	0.38117	0.564	0.244	1.52842e-66	L3-IL7R-TOX-TCF7.T	PPP1R14B
SLFN51	6.84595e-69	0.375334	0.732	0.378	9.99851e-65	L3-IL7R-TOX-TCF7.T	SLFN5
STAT11	9.37298e-69	0.460906	0.753	0.423	1.36892e-64	L3-IL7R-TOX-TCF7.T	STAT1
ARID1B	2.09377e-67	0.349283	0.707	0.358	3.05795e-63	L3-IL7R-TOX-TCF7.T	ARID1B
IL7R1	1.78775e-66	0.528989	0.792	0.486	2.611e-62	L3-IL7R-TOX-TCF7.T	IL7R
FYN	6.09096e-66	0.350621	0.889	0.571	8.89584e-62	L3-IL7R-TOX-TCF7.T	FYN
PTPRC1	6.18654e-66	0.396888	0.961	0.797	9.03545e-62	L3-IL7R-TOX-TCF7.T	PTPRC
ETS1	2.8157e-65	0.394086	0.884	0.585	4.11233e-61	L3-IL7R-TOX-TCF7.T	ETS1
BPTF	4.11643e-65	0.350491	0.789	0.443	6.01204e-61	L3-IL7R-TOX-TCF7.T	BPTF
GBP11	4.86951e-65	0.496035	0.63	0.31	7.11191e-61	L3-IL7R-TOX-TCF7.T	GBP1
GBP5	1.02267e-62	0.334446	0.752	0.392	1.49361e-58	L3-IL7R-TOX-TCF7.T	GBP5
PCSK7	7.22177e-61	0.355817	0.787	0.437	1.05474e-56	L3-IL7R-TOX-TCF7.T	PCSK7
PLCG21	1.3615e-59	0.594843	0.684	0.33	1.98847e-55	L3-IL7R-TOX-TCF7.T	PLCG2
ANKRD12	1.02586e-58	0.388073	0.886	0.617	1.49826e-54	L3-IL7R-TOX-TCF7.T	ANKRD12
FKBP5	3.398e-58	0.336932	0.878	0.587	4.96278e-54	L3-IL7R-TOX-TCF7.T	FKBP5
PIK3R1	8.27427e-58	0.327236	0.863	0.562	1.20846e-53	L3-IL7R-TOX-TCF7.T	PIK3R1
PPP2R5C	8.30163e-58	0.325291	0.883	0.595	1.21245e-53	L3-IL7R-TOX-TCF7.T	PPP2R5C
MACF1	1.54021e-56	0.328401	0.824	0.488	2.24948e-52	L3-IL7R-TOX-TCF7.T	MACF1
ANKRD11	1.74684e-56	0.330708	0.787	0.463	2.55125e-52	L3-IL7R-TOX-TCF7.T	ANKRD11
IKZF1	1.53835e-55	0.378976	0.877	0.592	2.24676e-51	L3-IL7R-TOX-TCF7.T	IKZF1
AKAP13	6.55865e-55	0.334165	0.894	0.641	9.5789e-51	L3-IL7R-TOX-TCF7.T	AKAP13
RNF213	1.93628e-51	0.401918	0.912	0.679	2.82794e-47	L3-IL7R-TOX-TCF7.T	RNF213
JUND1	8.04904e-42	0.336488	0.909	0.715	1.17556e-37	L3-IL7R-TOX-TCF7.T	JUND
NEAT1	4.70219e-33	0.338213	0.937	0.818	6.86755e-29	L3-IL7R-TOX-TCF7.T	NEAT1
FOXP3	0	1.16057	0.441	0.059	0	L4-Treg	FOXP3
TNFRSF4	3.69347e-303	1.78175	0.6	0.142	5.39431e-299	L4-Treg	TNFRSF4
TNFRSF18	2.62273e-276	1.52354	0.648	0.182	3.8305e-272	L4-Treg	TNFRSF18
CTLA4	2.28014e-253	1.25281	0.679	0.215	3.33015e-249	L4-Treg	CTLA4
BATF	6.13234e-221	1.37413	0.71	0.279	8.95628e-217	L4-Treg	BATF
IL321	7.76993e-209	1.07516	0.971	0.751	1.1348e-204	L4-Treg	IL32
IL2RA	2.58331e-194	1.29778	0.469	0.123	3.77293e-190	L4-Treg	IL2RA
TIGIT	7.29133e-187	1.12373	0.668	0.262	1.0649e-182	L4-Treg	TIGIT
ICOS	5.47977e-180	1.05472	0.653	0.255	8.00321e-176	L4-Treg	ICOS
LAYN	1.82016e-171	0.643349	0.263	0.041	2.65834e-167	L4-Treg	LAYN
LAIR2	2.8493e-165	0.869216	0.356	0.078	4.1614e-161	L4-Treg	LAIR2
LTB1	3.9872e-152	1.34289	0.808	0.452	5.82331e-148	L4-Treg	LTB
S100A41	8.09455e-151	0.864473	0.946	0.742	1.18221e-146	L4-Treg	S100A4
TNFRSF9	2.00064e-150	0.979634	0.471	0.146	2.92194e-146	L4-Treg	TNFRSF9
TBC1D4	1.03045e-146	0.861592	0.527	0.193	1.50497e-142	L4-Treg	TBC1D4
TRAC	4.35901e-133	0.980334	0.843	0.554	6.36634e-129	L4-Treg	TRAC
CD271	4.89562e-130	0.874239	0.733	0.382	7.15005e-126	L4-Treg	CD27
CARD16	3.01761e-129	0.985656	0.734	0.413	4.40722e-125	L4-Treg	CARD16
RTKN2	9.85557e-125	0.702541	0.293	0.067	1.43941e-120	L4-Treg	RTKN2
SPOCK21	5.98907e-119	0.688828	0.829	0.507	8.74703e-115	L4-Treg	SPOCK2
SLAMF1	9.7382e-110	0.724214	0.452	0.168	1.42226e-105	L4-Treg	SLAMF1
CD3D1	7.11889e-109	0.612601	0.924	0.661	1.03971e-104	L4-Treg	CD3D
DUSP4	1.49697e-108	0.75399	0.782	0.466	2.18632e-104	L4-Treg	DUSP4
UGP2	1.05316e-103	0.756188	0.709	0.416	1.53814e-99	L4-Treg	UGP2
CORO1B	2.25176e-103	0.78971	0.673	0.381	3.2887e-99	L4-Treg	CORO1B
HLA-A	3.10851e-97	0.510107	0.989	0.933	4.53998e-93	L4-Treg	HLA-A
CTSC	2.96885e-96	0.715313	0.82	0.544	4.33601e-92	L4-Treg	CTSC
ACP5	1.21068e-94	0.694939	0.468	0.197	1.7682e-90	L4-Treg	ACP5
ARID5B	1.29447e-92	0.6299	0.774	0.485	1.89058e-88	L4-Treg	ARID5B
CD21	1.84769e-92	0.568057	0.918	0.682	2.69854e-88	L4-Treg	CD2
B2M	2.60263e-91	0.366326	0.998	0.986	3.80113e-87	L4-Treg	B2M
CD79B	3.44708e-79	0.486118	0.376	0.143	5.03447e-75	L4-Treg	CD79B
IKZF2	4.10934e-78	0.533408	0.285	0.09	6.00169e-74	L4-Treg	IKZF2
GBP2	4.25045e-78	0.619169	0.682	0.413	6.20779e-74	L4-Treg	GBP2
BTG3	1.06534e-77	0.607184	0.649	0.384	1.55593e-73	L4-Treg	BTG3
SIRPG	6.57688e-77	0.543015	0.424	0.179	9.60554e-73	L4-Treg	SIRPG
DNPH1	1.5419e-74	0.623526	0.521	0.271	2.25195e-70	L4-Treg	DNPH1
PHLDA1	1.40292e-73	0.678609	0.529	0.271	2.04897e-69	L4-Treg	PHLDA1
SOD1	7.52852e-73	0.613866	0.814	0.603	1.09954e-68	L4-Treg	SOD1
TNFRSF1B	2.02359e-72	0.628542	0.737	0.485	2.95545e-68	L4-Treg	TNFRSF1B
PIM2	6.04585e-72	0.633437	0.501	0.247	8.82997e-68	L4-Treg	PIM2
PMAIP1	4.50046e-71	0.782397	0.647	0.411	6.57292e-67	L4-Treg	PMAIP1
STAM	7.35006e-71	0.487023	0.351	0.139	1.07348e-66	L4-Treg	STAM
LCK	2.06492e-70	0.465812	0.798	0.538	3.01581e-66	L4-Treg	LCK
CALM3	4.04415e-70	0.493211	0.743	0.494	5.90647e-66	L4-Treg	CALM3
GADD45A	1.15536e-69	0.700532	0.474	0.237	1.6874e-65	L4-Treg	GADD45A
TRBC21	4.17703e-69	0.63533	0.831	0.603	6.10056e-65	L4-Treg	TRBC2
UCP2	4.91424e-69	0.624798	0.723	0.491	7.17724e-65	L4-Treg	UCP2
CD4	7.94447e-69	0.547584	0.541	0.289	1.16029e-64	L4-Treg	CD4
GLRX	6.17977e-68	0.601625	0.658	0.413	9.02556e-64	L4-Treg	GLRX
SIT1	1.91466e-67	0.515995	0.569	0.31	2.79636e-63	L4-Treg	SIT1
PBXIP1	3.46035e-67	0.527264	0.644	0.387	5.05385e-63	L4-Treg	PBXIP1
CD3E1	1.03917e-66	0.401459	0.899	0.652	1.5177e-62	L4-Treg	CD3E
ICAM3	5.56351e-66	0.462199	0.707	0.469	8.1255e-62	L4-Treg	ICAM3
PPM1G	1.71472e-64	0.471468	0.628	0.393	2.50435e-60	L4-Treg	PPM1G
MAST4	2.48346e-64	0.456342	0.27	0.093	3.62709e-60	L4-Treg	MAST4
PKM	2.62939e-64	0.599432	0.763	0.534	3.84023e-60	L4-Treg	PKM
IL2RG	7.75387e-64	0.585602	0.715	0.493	1.13245e-59	L4-Treg	IL2RG
MYL6	9.99938e-61	0.380879	0.958	0.829	1.46041e-56	L4-Treg	MYL6
RAC2	3.8336e-60	0.455668	0.839	0.626	5.59897e-56	L4-Treg	RAC2
FKBP1A	1.31464e-59	0.474589	0.679	0.449	1.92003e-55	L4-Treg	FKBP1A
CD28	8.05239e-59	0.451992	0.447	0.219	1.17605e-54	L4-Treg	CD28
ENO1	2.19111e-58	0.497392	0.846	0.647	3.20011e-54	L4-Treg	ENO1
PRDX2	1.395e-57	0.492243	0.65	0.419	2.0374e-53	L4-Treg	PRDX2
BIRC3	4.33641e-57	0.535813	0.617	0.376	6.33333e-53	L4-Treg	BIRC3
DOK2	1.36898e-56	0.487689	0.622	0.389	1.9994e-52	L4-Treg	DOK2
CXCR6	1.66123e-56	0.520112	0.508	0.272	2.42622e-52	L4-Treg	CXCR6
PTTG1	1.92798e-56	0.442643	0.507	0.27	2.81582e-52	L4-Treg	PTTG1
CCND2	2.07902e-56	0.567907	0.596	0.36	3.03641e-52	L4-Treg	CCND2
SUB1	4.1593e-55	0.374453	0.905	0.701	6.07466e-51	L4-Treg	SUB1
CYTOR	1.57985e-53	0.446986	0.727	0.5	2.30737e-49	L4-Treg	CYTOR
TMEM173	1.68185e-53	0.485629	0.559	0.339	2.45634e-49	L4-Treg	TMEM173
GAPDH	2.08788e-53	0.43727	0.97	0.859	3.04935e-49	L4-Treg	GAPDH
RHBDD2	1.65966e-52	0.600864	0.457	0.249	2.42393e-48	L4-Treg	RHBDD2
PGAM1	2.19768e-52	0.49514	0.663	0.455	3.20971e-48	L4-Treg	PGAM1
ARL6IP5	2.23847e-52	0.396807	0.794	0.588	3.26928e-48	L4-Treg	ARL6IP5
CD522	2.61135e-52	0.400003	0.915	0.71	3.81388e-48	L4-Treg	CD52
RHOH	4.80905e-52	0.434332	0.684	0.459	7.02362e-48	L4-Treg	RHOH
SUMO2	4.81242e-51	0.344422	0.844	0.661	7.02854e-47	L4-Treg	SUMO2
ACTG1	6.39614e-51	0.353379	0.968	0.833	9.34156e-47	L4-Treg	ACTG1
PARK7	1.0732e-50	0.382513	0.779	0.585	1.56741e-46	L4-Treg	PARK7
CASP1	2.16678e-50	0.45937	0.546	0.33	3.16458e-46	L4-Treg	CASP1
CXCR3	3.56111e-49	0.480955	0.478	0.266	5.201e-45	L4-Treg	CXCR3
S100A6	4.63955e-48	0.342586	0.92	0.739	6.77606e-44	L4-Treg	S100A6
GBP51	4.69084e-48	0.392511	0.625	0.395	6.85097e-44	L4-Treg	GBP5
C9orf16	2.33804e-47	0.405209	0.728	0.535	3.41471e-43	L4-Treg	C9orf16
GTF3C6	2.84333e-46	0.378803	0.532	0.327	4.15268e-42	L4-Treg	GTF3C6
NDUFV2	1.24339e-45	0.378144	0.644	0.443	1.81597e-41	L4-Treg	NDUFV2
PHTF2	1.32204e-45	0.445609	0.432	0.238	1.93084e-41	L4-Treg	PHTF2
ARHGDIB	8.19507e-45	0.34446	0.948	0.782	1.19689e-40	L4-Treg	ARHGDIB
CLIC1	7.12663e-44	0.325602	0.904	0.716	1.04084e-39	L4-Treg	CLIC1
CYTIP	9.54642e-44	0.363227	0.835	0.655	1.39425e-39	L4-Treg	CYTIP
PSMB8	3.91998e-43	0.325621	0.74	0.543	5.72514e-39	L4-Treg	PSMB8
CKLF	3.90026e-42	0.390127	0.68	0.471	5.69634e-38	L4-Treg	CKLF
ZNRF1	5.21563e-42	0.386015	0.276	0.123	7.61742e-38	L4-Treg	ZNRF1
COX5A	5.77079e-42	0.40532	0.683	0.474	8.42823e-38	L4-Treg	COX5A
DUSP16	1.09483e-41	0.416998	0.35	0.177	1.599e-37	L4-Treg	DUSP16
PRDM1	1.94254e-41	0.410047	0.668	0.472	2.83707e-37	L4-Treg	PRDM1
ENTPD1	2.60573e-41	0.482605	0.396	0.223	3.80567e-37	L4-Treg	ENTPD1
TXN	3.60015e-41	0.367545	0.679	0.478	5.25802e-37	L4-Treg	TXN
CD7	2.20757e-40	0.468184	0.744	0.563	3.22416e-36	L4-Treg	CD7
SH2D2A	3.39087e-40	0.429572	0.549	0.351	4.95236e-36	L4-Treg	SH2D2A
SAMSN1	3.49917e-40	0.351422	0.8	0.597	5.11053e-36	L4-Treg	SAMSN1
STK17B1	1.04332e-39	0.364492	0.806	0.629	1.52377e-35	L4-Treg	STK17B
NDUFA4	1.28277e-39	0.32618	0.818	0.623	1.87349e-35	L4-Treg	NDUFA4
CCNG2	1.95037e-38	0.446945	0.271	0.125	2.84851e-34	L4-Treg	CCNG2
LAT	4.57807e-38	0.32566	0.596	0.397	6.68627e-34	L4-Treg	LAT
C12orf57	6.10132e-38	0.337559	0.718	0.522	8.91098e-34	L4-Treg	C12orf57
CD82	1.15703e-37	0.436895	0.441	0.266	1.68985e-33	L4-Treg	CD82
CACYBP	2.04865e-37	0.410467	0.643	0.454	2.99205e-33	L4-Treg	CACYBP
AQP3	9.93729e-37	0.482108	0.312	0.156	1.45134e-32	L4-Treg	AQP3
TRAF1	1.2059e-35	0.343851	0.335	0.174	1.76122e-31	L4-Treg	TRAF1
PIM3	1.5334e-35	0.414936	0.482	0.311	2.23953e-31	L4-Treg	PIM3
CD70	4.27581e-35	0.563626	0.258	0.121	6.24483e-31	L4-Treg	CD70
ISG20	4.3522e-35	0.382381	0.813	0.67	6.35638e-31	L4-Treg	ISG20
PELI1	5.03566e-35	0.337393	0.422	0.249	7.35458e-31	L4-Treg	PELI1
TNIP2	8.66567e-35	0.457889	0.385	0.223	1.26562e-30	L4-Treg	TNIP2
TNFRSF25	2.21974e-34	0.350614	0.333	0.176	3.24193e-30	L4-Treg	TNFRSF25
IL2RB	6.32052e-34	0.389768	0.501	0.319	9.23112e-30	L4-Treg	IL2RB
EMP3	6.36511e-34	0.355497	0.74	0.563	9.29624e-30	L4-Treg	EMP3
PHACTR2	8.38451e-33	0.423412	0.366	0.21	1.22456e-28	L4-Treg	PHACTR2
TANK	3.89597e-32	0.343677	0.563	0.393	5.69006e-28	L4-Treg	TANK
MAF	4.37479e-32	0.40529	0.531	0.353	6.38938e-28	L4-Treg	MAF
SCAND1	8.16232e-32	0.351987	0.637	0.469	1.19211e-27	L4-Treg	SCAND1
TNIP1	1.46031e-30	0.32255	0.443	0.286	2.13278e-26	L4-Treg	TNIP1
ITM2A	1.90916e-30	0.332413	0.619	0.437	2.78832e-26	L4-Treg	ITM2A
RAB11FIP1	4.69675e-30	0.431775	0.427	0.268	6.85961e-26	L4-Treg	RAB11FIP1
LGALS3	6.29578e-30	0.328187	0.529	0.358	9.19499e-26	L4-Treg	LGALS3
FAS	1.7137e-28	0.337974	0.351	0.204	2.50285e-24	L4-Treg	FAS
LY6E	2.43963e-28	0.323912	0.769	0.598	3.56308e-24	L4-Treg	LY6E
SNX9	3.13467e-27	0.333582	0.376	0.235	4.57818e-23	L4-Treg	SNX9
IFI6	2.0157e-26	0.443198	0.542	0.371	2.94394e-22	L4-Treg	IFI6
SPATS2L	3.46242e-26	0.379245	0.36	0.222	5.05686e-22	L4-Treg	SPATS2L
EPSTI1	1.01644e-25	0.364267	0.479	0.331	1.48451e-21	L4-Treg	EPSTI1
RHOC	3.86718e-25	0.348542	0.476	0.334	5.64801e-21	L4-Treg	RHOC
TRBC1	1.81768e-24	0.625701	0.597	0.459	2.65472e-20	L4-Treg	TRBC1
PCED1B	8.64569e-24	0.32466	0.326	0.197	1.2627e-19	L4-Treg	PCED1B
ISG15	4.42257e-23	0.328542	0.644	0.487	6.45916e-19	L4-Treg	ISG15
RAB9A	1.21201e-22	0.397136	0.373	0.248	1.77014e-18	L4-Treg	RAB9A
GNA15	1.23138e-22	0.331609	0.282	0.166	1.79843e-18	L4-Treg	GNA15
MVP	9.07602e-22	0.324747	0.416	0.288	1.32555e-17	L4-Treg	MVP
GATA3	2.36877e-21	0.363116	0.414	0.28	3.45959e-17	L4-Treg	GATA3
LGALS1	4.4118e-19	0.325603	0.707	0.563	6.44344e-15	L4-Treg	LGALS1
LAG31	0.0020958	0.386786	0.335	0.309	1	L4-Treg	LAG3
GNLY	0	2.23987	0.636	0.203	0	L5-XCL1/2-GZMA/B-KLRB1-PRF1.T	GNLY
NKG71	0	1.52608	0.92	0.548	0	L5-XCL1/2-GZMA/B-KLRB1-PRF1.T	NKG7
KLRD1	0	1.50103	0.77	0.258	0	L5-XCL1/2-GZMA/B-KLRB1-PRF1.T	KLRD1
KLRF1	2.66348e-284	1.09872	0.273	0.032	3.89001e-280	L5-XCL1/2-GZMA/B-KLRB1-PRF1.T	KLRF1
PRF1	6.28257e-243	1.33125	0.757	0.389	9.17569e-239	L5-XCL1/2-GZMA/B-KLRB1-PRF1.T	PRF1
CTSW1	3.93131e-216	1.24985	0.77	0.432	5.74168e-212	L5-XCL1/2-GZMA/B-KLRB1-PRF1.T	CTSW
TRDC	1.30574e-202	1.07673	0.351	0.078	1.90703e-198	L5-XCL1/2-GZMA/B-KLRB1-PRF1.T	TRDC
GZMB	4.38009e-185	1.35364	0.653	0.314	6.39713e-181	L5-XCL1/2-GZMA/B-KLRB1-PRF1.T	GZMB
FGFBP2	9.50845e-170	1.43632	0.258	0.05	1.38871e-165	L5-XCL1/2-GZMA/B-KLRB1-PRF1.T	FGFBP2
HOPX	9.24818e-154	1.07902	0.528	0.229	1.3507e-149	L5-XCL1/2-GZMA/B-KLRB1-PRF1.T	HOPX
CLIC3	1.97095e-138	1.14739	0.476	0.201	2.87857e-134	L5-XCL1/2-GZMA/B-KLRB1-PRF1.T	CLIC3
KLRC1	6.42407e-132	1.15709	0.335	0.102	9.38235e-128	L5-XCL1/2-GZMA/B-KLRB1-PRF1.T	KLRC1
TMIGD2	4.95361e-130	0.797848	0.261	0.065	7.23474e-126	L5-XCL1/2-GZMA/B-KLRB1-PRF1.T	TMIGD2
MATK	1.87454e-127	0.859788	0.51	0.238	2.73777e-123	L5-XCL1/2-GZMA/B-KLRB1-PRF1.T	MATK
CD71	4.28901e-124	0.939668	0.77	0.556	6.26409e-120	L5-XCL1/2-GZMA/B-KLRB1-PRF1.T	CD7
CD247	2.27171e-109	0.848569	0.675	0.466	3.31783e-105	L5-XCL1/2-GZMA/B-KLRB1-PRF1.T	CD247
TXK	3.98502e-109	0.911115	0.337	0.119	5.82013e-105	L5-XCL1/2-GZMA/B-KLRB1-PRF1.T	TXK
AREG	2.80398e-107	1.35179	0.566	0.325	4.09521e-103	L5-XCL1/2-GZMA/B-KLRB1-PRF1.T	AREG
CST71	1.61763e-100	0.722442	0.775	0.583	2.36255e-96	L5-XCL1/2-GZMA/B-KLRB1-PRF1.T	CST7
KLRB11	9.49409e-99	0.9875	0.552	0.3	1.38661e-94	L5-XCL1/2-GZMA/B-KLRB1-PRF1.T	KLRB1
CCL51	1.0744e-95	0.662138	0.868	0.721	1.56917e-91	L5-XCL1/2-GZMA/B-KLRB1-PRF1.T	CCL5
XCL2	1.3067e-89	1.14881	0.339	0.135	1.90843e-85	L5-XCL1/2-GZMA/B-KLRB1-PRF1.T	XCL2
CMC1	8.15695e-81	1.13432	0.493	0.301	1.19132e-76	L5-XCL1/2-GZMA/B-KLRB1-PRF1.T	CMC1
IFITM2	5.27212e-76	0.657497	0.763	0.621	7.69992e-72	L5-XCL1/2-GZMA/B-KLRB1-PRF1.T	IFITM2
MCTP2	4.31392e-73	0.680198	0.295	0.12	6.30048e-69	L5-XCL1/2-GZMA/B-KLRB1-PRF1.T	MCTP2
IL2RB1	9.22312e-73	0.764843	0.504	0.315	1.34704e-68	L5-XCL1/2-GZMA/B-KLRB1-PRF1.T	IL2RB
C1orf21	4.70646e-70	0.589349	0.258	0.099	6.87379e-66	L5-XCL1/2-GZMA/B-KLRB1-PRF1.T	C1orf21
XCL1	1.93859e-64	1.11269	0.254	0.099	2.83131e-60	L5-XCL1/2-GZMA/B-KLRB1-PRF1.T	XCL1
SPON2	1.16651e-60	1.14022	0.369	0.203	1.70369e-56	L5-XCL1/2-GZMA/B-KLRB1-PRF1.T	SPON2
GSTP1	2.11881e-58	0.582757	0.662	0.514	3.09452e-54	L5-XCL1/2-GZMA/B-KLRB1-PRF1.T	GSTP1
HCST1	3.22344e-53	0.408619	0.846	0.733	4.70783e-49	L5-XCL1/2-GZMA/B-KLRB1-PRF1.T	HCST
TYROBP	1.55925e-52	0.361468	0.764	0.543	2.27728e-48	L5-XCL1/2-GZMA/B-KLRB1-PRF1.T	TYROBP
MAPK1	1.64463e-52	0.617883	0.462	0.305	2.40198e-48	L5-XCL1/2-GZMA/B-KLRB1-PRF1.T	MAPK1
GZMA1	1.22452e-48	0.4192	0.752	0.589	1.78842e-44	L5-XCL1/2-GZMA/B-KLRB1-PRF1.T	GZMA
ADGRG1	1.66433e-47	0.636138	0.304	0.16	2.43075e-43	L5-XCL1/2-GZMA/B-KLRB1-PRF1.T	ADGRG1
CHST12	1.23505e-43	0.530222	0.508	0.369	1.80379e-39	L5-XCL1/2-GZMA/B-KLRB1-PRF1.T	CHST12
CCL4	1.77291e-41	0.536582	0.849	0.716	2.58933e-37	L5-XCL1/2-GZMA/B-KLRB1-PRF1.T	CCL4
SAMD3	2.33313e-41	0.497715	0.423	0.276	3.40753e-37	L5-XCL1/2-GZMA/B-KLRB1-PRF1.T	SAMD3
GZMH1	5.4384e-41	0.624219	0.566	0.419	7.94278e-37	L5-XCL1/2-GZMA/B-KLRB1-PRF1.T	GZMH
GZMM1	1.57548e-39	0.521121	0.563	0.447	2.30098e-35	L5-XCL1/2-GZMA/B-KLRB1-PRF1.T	GZMM
PLAC8	1.9667e-39	0.692089	0.348	0.214	2.87236e-35	L5-XCL1/2-GZMA/B-KLRB1-PRF1.T	PLAC8
GFOD1	2.71589e-37	0.533578	0.255	0.132	3.96656e-33	L5-XCL1/2-GZMA/B-KLRB1-PRF1.T	GFOD1
2021-09-07	9.89919e-35	0.337624	0.704	0.622	1.44578e-30	L5-XCL1/2-GZMA/B-KLRB1-PRF1.T	2021-09-07
BIN2	4.8844e-33	0.448664	0.54	0.445	7.13366e-29	L5-XCL1/2-GZMA/B-KLRB1-PRF1.T	BIN2
LITAF	2.46539e-32	0.442131	0.631	0.54	3.6007e-28	L5-XCL1/2-GZMA/B-KLRB1-PRF1.T	LITAF
APMAP	2.89907e-31	0.489069	0.451	0.345	4.23409e-27	L5-XCL1/2-GZMA/B-KLRB1-PRF1.T	APMAP
TGFB1	1.2756e-30	0.481995	0.549	0.464	1.86302e-26	L5-XCL1/2-GZMA/B-KLRB1-PRF1.T	TGFB1
ADGRE5	3.46046e-26	0.35487	0.629	0.554	5.05401e-22	L5-XCL1/2-GZMA/B-KLRB1-PRF1.T	ADGRE5
IRF1	6.6053e-26	0.375015	0.647	0.575	9.64704e-22	L5-XCL1/2-GZMA/B-KLRB1-PRF1.T	IRF1
GNPTAB	7.902e-25	0.548825	0.398	0.306	1.15409e-20	L5-XCL1/2-GZMA/B-KLRB1-PRF1.T	GNPTAB
ZEB2	6.80592e-24	0.438764	0.513	0.422	9.94004e-20	L5-XCL1/2-GZMA/B-KLRB1-PRF1.T	ZEB2
EFHD2	2.02906e-23	0.548028	0.452	0.38	2.96345e-19	L5-XCL1/2-GZMA/B-KLRB1-PRF1.T	EFHD2
APOBEC3G1	4.23605e-23	0.359948	0.56	0.488	6.18675e-19	L5-XCL1/2-GZMA/B-KLRB1-PRF1.T	APOBEC3G
CLEC2B1	1.53562e-20	0.343532	0.596	0.533	2.24277e-16	L5-XCL1/2-GZMA/B-KLRB1-PRF1.T	CLEC2B
CCND3	1.40702e-19	0.329946	0.571	0.522	2.05495e-15	L5-XCL1/2-GZMA/B-KLRB1-PRF1.T	CCND3
FLNA	1.97676e-19	0.455105	0.516	0.445	2.88706e-15	L5-XCL1/2-GZMA/B-KLRB1-PRF1.T	FLNA
ABHD17A	4.68185e-19	0.412575	0.454	0.391	6.83784e-15	L5-XCL1/2-GZMA/B-KLRB1-PRF1.T	ABHD17A
AOAH	2.10998e-18	0.388439	0.342	0.261	3.08163e-14	L5-XCL1/2-GZMA/B-KLRB1-PRF1.T	AOAH
JAK1	7.74518e-18	0.338694	0.591	0.556	1.13118e-13	L5-XCL1/2-GZMA/B-KLRB1-PRF1.T	JAK1
MAFF	1.35569e-17	0.436434	0.345	0.27	1.97999e-13	L5-XCL1/2-GZMA/B-KLRB1-PRF1.T	MAFF
PTPN4	2.59125e-17	0.349355	0.35	0.267	3.78452e-13	L5-XCL1/2-GZMA/B-KLRB1-PRF1.T	PTPN4
EIF3G	1.34752e-16	0.3371	0.614	0.59	1.96806e-12	L5-XCL1/2-GZMA/B-KLRB1-PRF1.T	EIF3G
TPST2	3.08557e-16	0.440747	0.305	0.232	4.50647e-12	L5-XCL1/2-GZMA/B-KLRB1-PRF1.T	TPST2
GABARAPL1	4.23389e-16	0.380876	0.454	0.392	6.18359e-12	L5-XCL1/2-GZMA/B-KLRB1-PRF1.T	GABARAPL1
SUN2	8.07725e-15	0.33916	0.433	0.375	1.17968e-10	L5-XCL1/2-GZMA/B-KLRB1-PRF1.T	SUN2
RASSF1	5.76184e-14	0.374061	0.309	0.245	8.41517e-10	L5-XCL1/2-GZMA/B-KLRB1-PRF1.T	RASSF1
IFITM11	1.34701e-13	0.498887	0.387	0.304	1.96731e-09	L5-XCL1/2-GZMA/B-KLRB1-PRF1.T	IFITM1
FCGR3A	1.43748e-13	0.361717	0.441	0.362	2.09944e-09	L5-XCL1/2-GZMA/B-KLRB1-PRF1.T	FCGR3A
DOK21	1.45019e-13	0.326774	0.449	0.398	2.118e-09	L5-XCL1/2-GZMA/B-KLRB1-PRF1.T	DOK2
AUTS2	1.99722e-12	0.329773	0.276	0.207	2.91694e-08	L5-XCL1/2-GZMA/B-KLRB1-PRF1.T	AUTS2
ARHGAP9	7.73508e-12	0.324445	0.466	0.434	1.12971e-07	L5-XCL1/2-GZMA/B-KLRB1-PRF1.T	ARHGAP9
CDC42SE1	1.02695e-11	0.328953	0.451	0.42	1.49986e-07	L5-XCL1/2-GZMA/B-KLRB1-PRF1.T	CDC42SE1
VPS37B	1.27266e-10	0.375345	0.421	0.376	1.85872e-06	L5-XCL1/2-GZMA/B-KLRB1-PRF1.T	VPS37B
GLIPR2	3.20639e-10	0.379582	0.343	0.299	4.68294e-06	L5-XCL1/2-GZMA/B-KLRB1-PRF1.T	GLIPR2
GPR65	3.39663e-10	0.342048	0.408	0.374	4.96078e-06	L5-XCL1/2-GZMA/B-KLRB1-PRF1.T	GPR65
METRNL	5.39202e-10	0.498309	0.341	0.3	7.87504e-06	L5-XCL1/2-GZMA/B-KLRB1-PRF1.T	METRNL
XBP1	5.53495e-10	0.371494	0.432	0.397	8.08379e-06	L5-XCL1/2-GZMA/B-KLRB1-PRF1.T	XBP1
CCDC69	7.95303e-10	0.322648	0.31	0.262	1.16154e-05	L5-XCL1/2-GZMA/B-KLRB1-PRF1.T	CCDC69
DSTN	1.11562e-09	0.324318	0.367	0.332	1.62937e-05	L5-XCL1/2-GZMA/B-KLRB1-PRF1.T	DSTN
ZAP70	1.3014e-09	0.327724	0.388	0.348	1.9007e-05	L5-XCL1/2-GZMA/B-KLRB1-PRF1.T	ZAP70
HMGN3	4.96307e-08	0.349197	0.377	0.352	0.000724856	L5-XCL1/2-GZMA/B-KLRB1-PRF1.T	HMGN3
STMN1	0	1.79923	0.695	0.243	0	L6-Proliferating	STMN1
MKI67	0	1.4756	0.478	0.057	0	L6-Proliferating	MKI67
TYMS	0	1.28385	0.509	0.05	0	L6-Proliferating	TYMS
TOP2A	0	1.28209	0.442	0.064	0	L6-Proliferating	TOP2A
PCLAF	0	1.18118	0.49	0.052	0	L6-Proliferating	PCLAF
UBE2C	0	1.0477	0.382	0.032	0	L6-Proliferating	UBE2C
ASPM	0	0.993579	0.345	0.04	0	L6-Proliferating	ASPM
TK1	0	0.86626	0.411	0.04	0	L6-Proliferating	TK1
TPX2	0	0.811306	0.388	0.05	0	L6-Proliferating	TPX2
BIRC5	0	0.790715	0.391	0.031	0	L6-Proliferating	BIRC5
CLSPN	0	0.737455	0.426	0.045	0	L6-Proliferating	CLSPN
CENPM	0	0.720288	0.459	0.076	0	L6-Proliferating	CENPM
RRM2	0	0.672872	0.343	0.023	0	L6-Proliferating	RRM2
CDK1	0	0.627952	0.381	0.052	0	L6-Proliferating	CDK1
CDKN3	0	0.606592	0.361	0.046	0	L6-Proliferating	CDKN3
ZWINT	0	0.583276	0.4	0.039	0	L6-Proliferating	ZWINT
GTSE1	0	0.556681	0.317	0.024	0	L6-Proliferating	GTSE1
AURKB	0	0.539455	0.308	0.025	0	L6-Proliferating	AURKB
CCNA2	0	0.532738	0.314	0.027	0	L6-Proliferating	CCNA2
ASF1B	0	0.52718	0.34	0.031	0	L6-Proliferating	ASF1B
CCNB2	0	0.522302	0.291	0.023	0	L6-Proliferating	CCNB2
HMMR	0	0.521037	0.261	0.021	0	L6-Proliferating	HMMR
CENPW	0	0.497109	0.393	0.06	0	L6-Proliferating	CENPW
UBE2T	0	0.495929	0.37	0.049	0	L6-Proliferating	UBE2T
KIFC1	0	0.480595	0.316	0.028	0	L6-Proliferating	KIFC1
CDT1	0	0.405546	0.253	0.019	0	L6-Proliferating	CDT1
MCM2	0	0.395758	0.291	0.03	0	L6-Proliferating	MCM2
MYBL2	0	0.378615	0.255	0.018	0	L6-Proliferating	MYBL2
UHRF1	0	0.355654	0.253	0.018	0	L6-Proliferating	UHRF1
CDCA5	0	0.354941	0.276	0.015	0	L6-Proliferating	CDCA5
NCAPG	3.61358e-306	0.329032	0.26	0.023	5.27763e-302	L6-Proliferating	NCAPG
NUF2	4.34776e-299	0.371772	0.276	0.028	6.34991e-295	L6-Proliferating	NUF2
FEN1	4.19954e-296	0.519843	0.377	0.057	6.13343e-292	L6-Proliferating	FEN1
CHEK1	6.5044e-294	0.345149	0.297	0.034	9.49967e-290	L6-Proliferating	CHEK1
GINS2	1.08183e-292	0.37781	0.272	0.028	1.58001e-288	L6-Proliferating	GINS2
CEP55	3.89275e-280	0.470462	0.306	0.038	5.68536e-276	L6-Proliferating	CEP55
NUSAP1	4.25835e-271	0.985165	0.482	0.109	6.21932e-267	L6-Proliferating	NUSAP1
KNL1	2.20367e-269	0.531487	0.302	0.039	3.21846e-265	L6-Proliferating	KNL1
CENPN	4.98215e-260	0.40098	0.338	0.051	7.27643e-256	L6-Proliferating	CENPN
KIF11	4.12845e-258	0.509944	0.287	0.036	6.0296e-254	L6-Proliferating	KIF11
MAD2L1	2.91163e-257	0.494145	0.397	0.073	4.25243e-253	L6-Proliferating	MAD2L1
WDR34	1.01283e-255	0.351455	0.259	0.029	1.47924e-251	L6-Proliferating	WDR34
FANCI	1.45148e-253	0.428177	0.331	0.05	2.11989e-249	L6-Proliferating	FANCI
CKS1B	4.59777e-250	0.847717	0.474	0.113	6.71505e-246	L6-Proliferating	CKS1B
CENPU	3.16567e-240	0.510492	0.34	0.057	4.62346e-236	L6-Proliferating	CENPU
ORC6	6.54035e-229	0.342282	0.271	0.037	9.55219e-225	L6-Proliferating	ORC6
MCM7	4.71901e-227	0.747756	0.465	0.117	6.89211e-223	L6-Proliferating	MCM7
DHFR	6.60395e-226	0.436439	0.352	0.065	9.64508e-222	L6-Proliferating	DHFR
CENPF	8.69819e-226	1.15811	0.458	0.115	1.27037e-221	L6-Proliferating	CENPF
MCM4	1.70295e-225	0.527472	0.325	0.056	2.48716e-221	L6-Proliferating	MCM4
CENPH	1.9528e-223	0.360209	0.332	0.057	2.85207e-219	L6-Proliferating	CENPH
HMGB3	2.37834e-215	0.470366	0.325	0.058	3.47356e-211	L6-Proliferating	HMGB3
HIST1H1B	8.30135e-215	1.08915	0.26	0.037	1.21241e-210	L6-Proliferating	HIST1H1B
SMC2	1.68703e-211	0.640774	0.472	0.126	2.46391e-207	L6-Proliferating	SMC2
NCAPG2	5.73447e-210	0.374937	0.275	0.042	8.37519e-206	L6-Proliferating	NCAPG2
DTYMK	5.52991e-201	0.562618	0.452	0.12	8.07643e-197	L6-Proliferating	DTYMK
PCNA	6.25077e-194	1.0165	0.557	0.199	9.12924e-190	L6-Proliferating	PCNA
CENPK	2.60784e-184	0.384101	0.372	0.084	3.80875e-180	L6-Proliferating	CENPK
PHF19	5.13125e-183	0.602175	0.457	0.13	7.4942e-179	L6-Proliferating	PHF19
SGO2	5.97348e-177	0.379544	0.274	0.049	8.72427e-173	L6-Proliferating	SGO2
CENPE	6.91118e-176	0.589574	0.317	0.067	1.00938e-171	L6-Proliferating	CENPE
TUBB	1.10651e-174	1.44212	0.729	0.453	1.61606e-170	L6-Proliferating	TUBB
NDC80	4.35156e-174	0.41921	0.351	0.079	6.35545e-170	L6-Proliferating	NDC80
AURKA	1.08112e-170	0.342637	0.255	0.044	1.57898e-166	L6-Proliferating	AURKA
HIRIP3	2.06524e-166	0.330107	0.379	0.095	3.01629e-162	L6-Proliferating	HIRIP3
RRM1	7.03466e-166	0.631501	0.426	0.12	1.02741e-161	L6-Proliferating	RRM1
TUBA1B	3.09523e-165	1.34948	0.825	0.633	4.52058e-161	L6-Proliferating	TUBA1B
TMEM106C	7.11904e-165	0.533049	0.445	0.132	1.03974e-160	L6-Proliferating	TMEM106C
GMNN	1.45785e-163	0.401195	0.38	0.097	2.12919e-159	L6-Proliferating	GMNN
SAC3D1	2.01015e-162	0.329741	0.28	0.055	2.93582e-158	L6-Proliferating	SAC3D1
MCM3	8.36551e-155	0.555275	0.429	0.131	1.22178e-150	L6-Proliferating	MCM3
ATAD5	2.22239e-147	0.43943	0.329	0.081	3.2458e-143	L6-Proliferating	ATAD5
BRCA2	2.50726e-147	0.394998	0.306	0.071	3.66186e-143	L6-Proliferating	BRCA2
ACOT7	6.81097e-147	0.395804	0.317	0.075	9.94742e-143	L6-Proliferating	ACOT7
ACTB	8.86799e-146	0.689719	0.972	0.945	1.29517e-141	L6-Proliferating	ACTB
WDR76	1.2467e-145	0.350274	0.291	0.065	1.8208e-141	L6-Proliferating	WDR76
EZH2	2.53689e-145	0.555587	0.454	0.146	3.70512e-141	L6-Proliferating	EZH2
DUT	9.34557e-145	1.07646	0.638	0.33	1.36492e-140	L6-Proliferating	DUT
KIF22	2.92799e-142	0.577644	0.452	0.149	4.27633e-138	L6-Proliferating	KIF22
HMGN2	3.80647e-142	1.13764	0.771	0.566	5.55935e-138	L6-Proliferating	HMGN2
LIG1	3.00101e-141	0.380273	0.378	0.107	4.38298e-137	L6-Proliferating	LIG1
NUDT1	1.83496e-140	0.673911	0.581	0.253	2.67996e-136	L6-Proliferating	NUDT1
RFC4	1.07337e-139	0.331937	0.301	0.071	1.56765e-135	L6-Proliferating	RFC4
YEATS4	1.23555e-137	0.342157	0.411	0.126	1.80452e-133	L6-Proliferating	YEATS4
GAPDH1	8.26017e-137	0.765272	0.938	0.86	1.2064e-132	L6-Proliferating	GAPDH
HMGB1	2.39023e-133	0.728868	0.88	0.815	3.49094e-129	L6-Proliferating	HMGB1
PTTG11	5.45073e-133	0.861138	0.583	0.261	7.9608e-129	L6-Proliferating	PTTG1
DDX39A	5.89281e-133	0.733023	0.605	0.272	8.60645e-129	L6-Proliferating	DDX39A
ACTG11	8.85418e-133	0.785106	0.904	0.836	1.29315e-128	L6-Proliferating	ACTG1
RPA3	2.34e-131	0.642489	0.579	0.26	3.41757e-127	L6-Proliferating	RPA3
DNAJC9	7.90812e-131	0.465375	0.501	0.19	1.15498e-126	L6-Proliferating	DNAJC9
SNRNP25	3.27499e-130	0.465542	0.434	0.147	4.78313e-126	L6-Proliferating	SNRNP25
CARHSP1	1.49589e-129	0.643619	0.595	0.27	2.18475e-125	L6-Proliferating	CARHSP1
H2AFZ	2.4045e-129	0.982139	0.763	0.568	3.51178e-125	L6-Proliferating	H2AFZ
LMNB1	3.90971e-127	0.507726	0.479	0.174	5.71013e-123	L6-Proliferating	LMNB1
MCM5	1.08137e-126	0.679629	0.454	0.167	1.57934e-122	L6-Proliferating	MCM5
HELLS	1.51079e-121	0.647251	0.387	0.126	2.20651e-117	L6-Proliferating	HELLS
RANBP1	5.01018e-118	0.783356	0.64	0.35	7.31737e-114	L6-Proliferating	RANBP1
HMGB2	9.47112e-118	1.14142	0.748	0.552	1.38326e-113	L6-Proliferating	HMGB2
USP1	2.94241e-113	0.597012	0.505	0.208	4.29738e-109	L6-Proliferating	USP1
SKA2	8.74198e-113	0.466598	0.485	0.192	1.27677e-108	L6-Proliferating	SKA2
ATAD2	5.76047e-108	0.55327	0.41	0.151	8.41316e-104	L6-Proliferating	ATAD2
VRK1	5.28983e-106	0.332371	0.388	0.132	7.72579e-102	L6-Proliferating	VRK1
SAE1	1.88371e-105	0.374118	0.463	0.181	2.75116e-101	L6-Proliferating	SAE1
H2AFV	7.61257e-105	0.794662	0.707	0.474	1.11182e-100	L6-Proliferating	H2AFV
CCDC167	1.55614e-104	0.501695	0.553	0.252	2.27275e-100	L6-Proliferating	CCDC167
MCM6	1.14872e-102	0.420759	0.38	0.134	1.6777e-98	L6-Proliferating	MCM6
PTMA	2.20429e-101	0.411944	0.937	0.925	3.21937e-97	L6-Proliferating	PTMA
NCAPD3	8.72558e-101	0.36009	0.308	0.094	1.27437e-96	L6-Proliferating	NCAPD3
SNRPD1	4.49368e-100	0.680811	0.644	0.361	6.56301e-96	L6-Proliferating	SNRPD1
RAN	1.1612e-99	0.688378	0.763	0.573	1.69594e-95	L6-Proliferating	RAN
NSD2	3.09561e-98	0.373447	0.396	0.145	4.52114e-94	L6-Proliferating	NSD2
LSM4	3.30088e-95	0.633304	0.59	0.307	4.82094e-91	L6-Proliferating	LSM4
ANP32B	3.09893e-93	0.718739	0.729	0.518	4.52599e-89	L6-Proliferating	ANP32B
PSMC3	3.5591e-90	0.511394	0.584	0.293	5.19806e-86	L6-Proliferating	PSMC3
HIST1H4C	6.93937e-88	1.35074	0.652	0.434	1.01349e-83	L6-Proliferating	HIST1H4C
TFDP1	4.5986e-87	0.32612	0.379	0.143	6.71626e-83	L6-Proliferating	TFDP1
CBX5	2.79161e-86	0.351657	0.489	0.219	4.07715e-82	L6-Proliferating	CBX5
SMC4	4.46044e-85	0.599934	0.589	0.321	6.51448e-81	L6-Proliferating	SMC4
DEK	4.8792e-85	0.630191	0.725	0.532	7.12607e-81	L6-Proliferating	DEK
CFL1	6.88118e-85	0.546045	0.879	0.822	1.005e-80	L6-Proliferating	CFL1
CENPX	8.77544e-85	0.395215	0.521	0.249	1.28165e-80	L6-Proliferating	CENPX
PFN1	7.28755e-84	0.653892	0.888	0.827	1.06435e-79	L6-Proliferating	PFN1
SLC25A5	1.87161e-83	0.729153	0.75	0.546	2.73349e-79	L6-Proliferating	SLC25A5
MAD2L2	7.52022e-83	0.382805	0.433	0.182	1.09833e-78	L6-Proliferating	MAD2L2
FDPS	6.27563e-82	0.442716	0.554	0.277	9.16556e-78	L6-Proliferating	FDPS
HPRT1	1.13135e-81	0.388176	0.473	0.214	1.65234e-77	L6-Proliferating	HPRT1
SSRP1	1.72184e-81	0.345385	0.465	0.208	2.51475e-77	L6-Proliferating	SSRP1
COX8A	2.54608e-81	0.568985	0.765	0.605	3.71854e-77	L6-Proliferating	COX8A
NME1	3.67086e-81	0.46186	0.42	0.181	5.36129e-77	L6-Proliferating	NME1
TACC3	1.87557e-80	0.389613	0.429	0.185	2.73927e-76	L6-Proliferating	TACC3
EBP	2.43487e-80	0.426212	0.493	0.223	3.55612e-76	L6-Proliferating	EBP
PKM1	4.37153e-79	0.738416	0.743	0.532	6.38462e-75	L6-Proliferating	PKM
TMPO	6.66349e-79	0.678169	0.568	0.313	9.73202e-75	L6-Proliferating	TMPO
CALM31	9.60089e-79	0.645769	0.706	0.493	1.40221e-74	L6-Proliferating	CALM3
SIVA1	1.59817e-77	0.595738	0.634	0.389	2.33412e-73	L6-Proliferating	SIVA1
TUBA1C	4.1335e-77	0.58852	0.508	0.258	6.03698e-73	L6-Proliferating	TUBA1C
SHMT2	2.06937e-76	0.351259	0.372	0.148	3.02231e-72	L6-Proliferating	SHMT2
FABP5	2.40558e-75	0.63724	0.583	0.33	3.51335e-71	L6-Proliferating	FABP5
SNRPB	4.56622e-75	0.590751	0.726	0.552	6.66897e-71	L6-Proliferating	SNRPB
CORO1A	9.87724e-75	0.625493	0.843	0.752	1.44257e-70	L6-Proliferating	CORO1A
LSM5	8.4809e-73	0.378519	0.538	0.282	1.23864e-68	L6-Proliferating	LSM5
LSM3	1.3535e-72	0.480818	0.584	0.329	1.97679e-68	L6-Proliferating	LSM3
CCT5	1.39454e-72	0.447182	0.567	0.306	2.03673e-68	L6-Proliferating	CCT5
TALDO1	9.33047e-72	0.497966	0.626	0.363	1.36271e-67	L6-Proliferating	TALDO1
ZDHHC12	9.58308e-72	0.388706	0.439	0.201	1.39961e-67	L6-Proliferating	ZDHHC12
ENO11	9.83985e-72	0.640155	0.784	0.649	1.43711e-67	L6-Proliferating	ENO1
COTL1	4.36535e-71	0.688914	0.808	0.649	6.37559e-67	L6-Proliferating	COTL1
DNMT1	1.27885e-69	0.444562	0.569	0.315	1.86777e-65	L6-Proliferating	DNMT1
NASP	5.28926e-69	0.566769	0.647	0.405	7.72496e-65	L6-Proliferating	NASP
TPI1	6.73383e-69	0.602895	0.769	0.608	9.83477e-65	L6-Proliferating	TPI1
NUDT21	1.2467e-68	0.356076	0.486	0.237	1.8208e-64	L6-Proliferating	NUDT21
PSMB2	1.49498e-68	0.450566	0.598	0.348	2.18343e-64	L6-Proliferating	PSMB2
PGAM11	3.9024e-68	0.625519	0.672	0.451	5.69945e-64	L6-Proliferating	PGAM1
SNRPF	4.1325e-68	0.470786	0.659	0.423	6.03551e-64	L6-Proliferating	SNRPF
HMGA1	7.31154e-68	0.633794	0.536	0.287	1.06785e-63	L6-Proliferating	HMGA1
PPP1CA	1.13121e-67	0.570363	0.714	0.507	1.65213e-63	L6-Proliferating	PPP1CA
KIF20B	2.18368e-67	0.366237	0.427	0.197	3.18927e-63	L6-Proliferating	KIF20B
SMC1A	3.87566e-67	0.368866	0.516	0.263	5.6604e-63	L6-Proliferating	SMC1A
CDC25B	7.06005e-67	0.3306	0.349	0.143	1.03112e-62	L6-Proliferating	CDC25B
ANP32E	9.62941e-67	0.483118	0.567	0.325	1.40637e-62	L6-Proliferating	ANP32E
ERH	3.58915e-66	0.566911	0.656	0.424	5.24195e-62	L6-Proliferating	ERH
IDH2	4.85205e-66	0.531898	0.645	0.412	7.08641e-62	L6-Proliferating	IDH2
MRPL51	7.41136e-66	0.42126	0.59	0.348	1.08243e-61	L6-Proliferating	MRPL51
JPT1	2.77568e-64	0.587641	0.698	0.478	4.05389e-60	L6-Proliferating	JPT1
PPIA	4.92172e-64	0.499611	0.849	0.762	7.18817e-60	L6-Proliferating	PPIA
UQCC2	5.37907e-64	0.330708	0.478	0.239	7.85613e-60	L6-Proliferating	UQCC2
MRPL27	5.40404e-62	0.391605	0.422	0.199	7.89261e-58	L6-Proliferating	MRPL27
RNASEH2C	1.00371e-61	0.390591	0.532	0.288	1.46592e-57	L6-Proliferating	RNASEH2C
KPNA2	1.44711e-60	0.480144	0.473	0.247	2.11351e-56	L6-Proliferating	KPNA2
CKS2	2.23714e-60	0.418781	0.533	0.29	3.26734e-56	L6-Proliferating	CKS2
PRDX3	2.94622e-60	0.421525	0.467	0.238	4.30295e-56	L6-Proliferating	PRDX3
SNRPE	1.29651e-59	0.404891	0.577	0.343	1.89356e-55	L6-Proliferating	SNRPE
VIM1	6.34746e-59	0.538953	0.891	0.807	9.27046e-55	L6-Proliferating	VIM
C12orf75	9.33964e-59	0.462857	0.593	0.345	1.36405e-54	L6-Proliferating	C12orf75
CBX3	3.60677e-58	0.441974	0.669	0.452	5.26769e-54	L6-Proliferating	CBX3
H2AFX	3.8487e-58	0.426911	0.461	0.24	5.62103e-54	L6-Proliferating	H2AFX
PDCD5	4.70639e-58	0.390781	0.562	0.323	6.87368e-54	L6-Proliferating	PDCD5
YBX1	1.41853e-57	0.493002	0.809	0.696	2.07176e-53	L6-Proliferating	YBX1
BANF1	1.60697e-57	0.343553	0.582	0.339	2.34699e-53	L6-Proliferating	BANF1
COX5A1	1.62202e-57	0.49875	0.681	0.47	2.36896e-53	L6-Proliferating	COX5A
PSMA4	1.24506e-56	0.430385	0.637	0.406	1.81842e-52	L6-Proliferating	PSMA4
SMC3	1.4069e-56	0.436526	0.558	0.324	2.05478e-52	L6-Proliferating	SMC3
ILF2	2.0522e-56	0.389763	0.574	0.333	2.99723e-52	L6-Proliferating	ILF2
ANAPC11	4.17709e-56	0.400053	0.629	0.404	6.10064e-52	L6-Proliferating	ANAPC11
LSM2	9.48343e-56	0.337155	0.52	0.288	1.38505e-51	L6-Proliferating	LSM2
AP2S1	4.89792e-55	0.423078	0.64	0.404	7.15341e-51	L6-Proliferating	AP2S1
SLBP	1.99428e-54	0.488732	0.551	0.314	2.91265e-50	L6-Proliferating	SLBP
H2AFY	2.24074e-54	0.475958	0.634	0.414	3.27259e-50	L6-Proliferating	H2AFY
UBE2S	1.80418e-53	0.547139	0.548	0.34	2.635e-49	L6-Proliferating	UBE2S
EIF5A	1.98597e-53	0.550008	0.655	0.444	2.9005e-49	L6-Proliferating	EIF5A
CHCHD2	2.88014e-53	0.47236	0.787	0.7	4.20644e-49	L6-Proliferating	CHCHD2
ARPC2	3.27127e-53	0.399619	0.828	0.772	4.77768e-49	L6-Proliferating	ARPC2
NDUFB3	3.8777e-53	0.355366	0.564	0.333	5.66337e-49	L6-Proliferating	NDUFB3
HIST1H1C	4.46991e-53	0.724715	0.471	0.257	6.52831e-49	L6-Proliferating	HIST1H1C
CDK2AP2	5.07478e-53	0.378674	0.539	0.302	7.41171e-49	L6-Proliferating	CDK2AP2
HSD17B10	1.49486e-52	0.387662	0.487	0.26	2.18325e-48	L6-Proliferating	HSD17B10
TXNDC17	1.52253e-52	0.333377	0.512	0.292	2.22365e-48	L6-Proliferating	TXNDC17
MRPL11	2.24845e-52	0.381324	0.466	0.246	3.28387e-48	L6-Proliferating	MRPL11
NUDT5	2.29144e-52	0.341751	0.478	0.256	3.34664e-48	L6-Proliferating	NUDT5
PSMB81	2.70926e-52	0.48772	0.724	0.541	3.95687e-48	L6-Proliferating	PSMB8
STOML2	4.82045e-52	0.330076	0.446	0.229	7.04027e-48	L6-Proliferating	STOML2
SNRPG	1.05406e-50	0.429953	0.658	0.476	1.53945e-46	L6-Proliferating	SNRPG
NUCKS1	1.58719e-50	0.468468	0.692	0.524	2.31809e-46	L6-Proliferating	NUCKS1
ETFB	6.0515e-50	0.350759	0.567	0.336	8.83822e-46	L6-Proliferating	ETFB
SSNA1	6.20952e-50	0.366452	0.578	0.345	9.06901e-46	L6-Proliferating	SSNA1
PSMB9	5.03677e-49	0.444617	0.747	0.618	7.3562e-45	L6-Proliferating	PSMB9
MYL61	1.07054e-48	0.345566	0.87	0.834	1.56352e-44	L6-Proliferating	MYL6
PRELID1	1.68218e-48	0.458734	0.69	0.495	2.45683e-44	L6-Proliferating	PRELID1
CDKN2D	3.24964e-48	0.330715	0.345	0.163	4.74609e-44	L6-Proliferating	CDKN2D
PSMA7	3.58993e-48	0.413374	0.759	0.636	5.2431e-44	L6-Proliferating	PSMA7
BLOC1S1	7.67988e-48	0.390493	0.631	0.413	1.12165e-43	L6-Proliferating	BLOC1S1
FIBP	9.39162e-48	0.36066	0.467	0.254	1.37165e-43	L6-Proliferating	FIBP
SUB11	2.74313e-47	0.451356	0.794	0.706	4.00634e-43	L6-Proliferating	SUB1
PDIA6	4.41728e-47	0.496695	0.626	0.406	6.45144e-43	L6-Proliferating	PDIA6
PSMD8	5.57208e-47	0.425206	0.67	0.47	8.13802e-43	L6-Proliferating	PSMD8
HIST2H2AC	6.11769e-47	0.496508	0.349	0.171	8.93488e-43	L6-Proliferating	HIST2H2AC
SNRPD3	1.44145e-46	0.349504	0.609	0.396	2.10524e-42	L6-Proliferating	SNRPD3
ARPC5	1.90959e-46	0.431352	0.702	0.532	2.78895e-42	L6-Proliferating	ARPC5
VDAC3	5.17399e-46	0.353031	0.513	0.3	7.55661e-42	L6-Proliferating	VDAC3
PA2G4	6.13704e-46	0.416113	0.649	0.452	8.96314e-42	L6-Proliferating	PA2G4
MDH1	6.16598e-46	0.326916	0.553	0.334	9.00542e-42	L6-Proliferating	MDH1
NDUFA6	1.22071e-45	0.365097	0.618	0.398	1.78285e-41	L6-Proliferating	NDUFA6
RALY	1.43515e-45	0.374904	0.615	0.397	2.09603e-41	L6-Proliferating	RALY
DCTN3	2.55921e-45	0.378044	0.564	0.355	3.73773e-41	L6-Proliferating	DCTN3
SNRPC	2.79493e-45	0.342451	0.532	0.313	4.08199e-41	L6-Proliferating	SNRPC
PSME2	4.45133e-45	0.473084	0.726	0.593	6.50117e-41	L6-Proliferating	PSME2
NDUFS8	5.54592e-45	0.33286	0.595	0.366	8.09982e-41	L6-Proliferating	NDUFS8
ANXA2	7.60325e-45	0.599595	0.658	0.454	1.11045e-40	L6-Proliferating	ANXA2
SUPT16H	8.30144e-45	0.352947	0.47	0.265	1.21243e-40	L6-Proliferating	SUPT16H
YWHAQ	2.34893e-44	0.416186	0.658	0.45	3.43061e-40	L6-Proliferating	YWHAQ
ANXA5	2.56153e-44	0.416421	0.681	0.467	3.74112e-40	L6-Proliferating	ANXA5
LDHA	3.74099e-44	0.429281	0.769	0.657	5.46372e-40	L6-Proliferating	LDHA
SRP9	5.55649e-44	0.446685	0.607	0.395	8.11526e-40	L6-Proliferating	SRP9
HMGN1	5.60619e-44	0.411104	0.752	0.6	8.18785e-40	L6-Proliferating	HMGN1
WDR1	5.71221e-44	0.38665	0.637	0.425	8.34268e-40	L6-Proliferating	WDR1
PSMD7	6.67077e-44	0.332419	0.57	0.353	9.74267e-40	L6-Proliferating	PSMD7
FKBP1A1	7.13877e-44	0.463289	0.653	0.447	1.04262e-39	L6-Proliferating	FKBP1A
PARK71	8.64699e-44	0.419954	0.727	0.585	1.26289e-39	L6-Proliferating	PARK7
PSMB6	9.24446e-44	0.379416	0.631	0.421	1.35015e-39	L6-Proliferating	PSMB6
PSMA2	9.74902e-44	0.322168	0.552	0.337	1.42384e-39	L6-Proliferating	PSMA2
NDUFA12	1.83632e-43	0.326302	0.602	0.383	2.68194e-39	L6-Proliferating	NDUFA12
MZT2B	4.34833e-43	0.406039	0.705	0.548	6.35073e-39	L6-Proliferating	MZT2B
PPM1G1	9.92495e-43	0.39941	0.605	0.391	1.44954e-38	L6-Proliferating	PPM1G
TXN1	4.60753e-42	0.476883	0.66	0.476	6.7293e-38	L6-Proliferating	TXN
CCT8	3.02826e-41	0.429333	0.559	0.348	4.42277e-37	L6-Proliferating	CCT8
VDAC1	8.00772e-41	0.384181	0.595	0.385	1.16953e-36	L6-Proliferating	VDAC1
GNG5	8.61177e-41	0.34295	0.69	0.507	1.25775e-36	L6-Proliferating	GNG5
SF3B6	3.82828e-39	0.340379	0.605	0.397	5.59121e-35	L6-Proliferating	SF3B6
MZT2A	1.00491e-38	0.334421	0.633	0.43	1.46767e-34	L6-Proliferating	MZT2A
PSMB3	1.5558e-38	0.351617	0.664	0.496	2.27225e-34	L6-Proliferating	PSMB3
NDUFB2	4.86191e-38	0.480345	0.712	0.532	7.10081e-34	L6-Proliferating	NDUFB2
ADRM1	6.73522e-38	0.356104	0.558	0.351	9.83679e-34	L6-Proliferating	ADRM1
UQCRQ	7.91872e-38	0.332478	0.676	0.49	1.15653e-33	L6-Proliferating	UQCRQ
ARPC5L	1.2359e-37	0.353692	0.639	0.426	1.80503e-33	L6-Proliferating	ARPC5L
NDUFB11	3.75848e-37	0.342696	0.702	0.533	5.48926e-33	L6-Proliferating	NDUFB11
PSMA5	4.33794e-37	0.325455	0.608	0.405	6.33557e-33	L6-Proliferating	PSMA5
NDUFA41	4.58708e-37	0.366311	0.749	0.625	6.69943e-33	L6-Proliferating	NDUFA4
TMEM109	6.04252e-37	0.335058	0.478	0.278	8.8251e-33	L6-Proliferating	TMEM109
AURKAIP1	1.02491e-36	0.359553	0.615	0.411	1.49689e-32	L6-Proliferating	AURKAIP1
LDHB	1.1373e-36	0.493962	0.755	0.593	1.66103e-32	L6-Proliferating	LDHB
RBX1	1.20502e-36	0.355376	0.664	0.475	1.75993e-32	L6-Proliferating	RBX1
SDF2L1	1.42044e-36	0.363815	0.502	0.303	2.07455e-32	L6-Proliferating	SDF2L1
NUCB2	1.97926e-36	0.326841	0.472	0.279	2.8907e-32	L6-Proliferating	NUCB2
PSMC5	6.4493e-36	0.373351	0.598	0.393	9.41921e-32	L6-Proliferating	PSMC5
XRCC6	6.94129e-36	0.322596	0.667	0.481	1.01378e-31	L6-Proliferating	XRCC6
ANXA6	7.4997e-36	0.374873	0.63	0.413	1.09533e-31	L6-Proliferating	ANXA6
TPM3	1.02388e-35	0.344985	0.777	0.67	1.49537e-31	L6-Proliferating	TPM3
UBE2L3	1.52356e-35	0.370678	0.634	0.452	2.22516e-31	L6-Proliferating	UBE2L3
RAD21	1.97508e-35	0.333461	0.593	0.411	2.88461e-31	L6-Proliferating	RAD21
COX6C	2.05254e-35	0.373842	0.759	0.659	2.99773e-31	L6-Proliferating	COX6C
NDUFV1	5.42382e-35	0.322049	0.486	0.288	7.92149e-31	L6-Proliferating	NDUFV1
CNN2	8.55309e-35	0.393792	0.625	0.418	1.24918e-30	L6-Proliferating	CNN2
GSTP11	2.16617e-34	0.495093	0.683	0.514	3.16369e-30	L6-Proliferating	GSTP1
SEM1	4.66491e-34	0.378227	0.655	0.476	6.8131e-30	L6-Proliferating	SEM1
ARPC1B	6.02683e-34	0.447082	0.731	0.605	8.80219e-30	L6-Proliferating	ARPC1B
TUBB4B	1.24674e-33	0.435361	0.615	0.451	1.82086e-29	L6-Proliferating	TUBB4B
UBE2I	2.42444e-33	0.352296	0.653	0.463	3.54089e-29	L6-Proliferating	UBE2I
GSTO1	5.19563e-33	0.357699	0.608	0.41	7.58822e-29	L6-Proliferating	GSTO1
ACTR3	5.35579e-33	0.414256	0.696	0.531	7.82213e-29	L6-Proliferating	ACTR3
TPM4	1.00033e-32	0.353677	0.623	0.44	1.46098e-28	L6-Proliferating	TPM4
SUMO21	1.53948e-32	0.348316	0.765	0.665	2.2484e-28	L6-Proliferating	SUMO2
PRDX21	6.07971e-32	0.419702	0.596	0.42	8.87942e-28	L6-Proliferating	PRDX2
CLIC11	1.1149e-31	0.352188	0.794	0.721	1.62832e-27	L6-Proliferating	CLIC1
CRIP1	1.86103e-31	0.360663	0.53	0.337	2.71804e-27	L6-Proliferating	CRIP1
PSMB1	2.91389e-31	0.363045	0.689	0.541	4.25573e-27	L6-Proliferating	PSMB1
PLP2	8.63926e-30	0.341578	0.617	0.439	1.26176e-25	L6-Proliferating	PLP2
DYNLL1	3.09433e-29	0.32698	0.673	0.516	4.51927e-25	L6-Proliferating	DYNLL1
XRCC5	4.71877e-29	0.333915	0.664	0.497	6.89176e-25	L6-Proliferating	XRCC5
PPA1	1.39456e-28	0.377452	0.55	0.368	2.03676e-24	L6-Proliferating	PPA1
HIST1H1E	2.78001e-28	0.805313	0.39	0.238	4.06021e-24	L6-Proliferating	HIST1H1E
SH3BGRL3	4.61098e-28	0.325549	0.858	0.812	6.73434e-24	L6-Proliferating	SH3BGRL3
RAC21	1.7514e-27	0.367968	0.74	0.63	2.55792e-23	L6-Proliferating	RAC2
S100A10	3.02507e-27	0.449409	0.788	0.661	4.41812e-23	L6-Proliferating	S100A10
HIST1H1D1	1.10539e-26	0.696301	0.387	0.239	1.61443e-22	L6-Proliferating	HIST1H1D
ARL6IP1	1.26654e-26	0.423083	0.598	0.426	1.84978e-22	L6-Proliferating	ARL6IP1
EIF3I	1.95344e-26	0.362655	0.57	0.395	2.853e-22	L6-Proliferating	EIF3I
NPM1	1.00247e-24	0.359803	0.825	0.753	1.4641e-20	L6-Proliferating	NPM1
LSP1	1.62448e-24	0.359404	0.742	0.618	2.37255e-20	L6-Proliferating	LSP1
ARPC3	3.28968e-24	0.336976	0.802	0.732	4.80458e-20	L6-Proliferating	ARPC3
LGALS11	9.91168e-24	0.567831	0.701	0.561	1.4476e-19	L6-Proliferating	LGALS1
TAGLN2	7.00997e-23	0.415081	0.678	0.539	1.02381e-18	L6-Proliferating	TAGLN2
AP2M1	8.25981e-23	0.330368	0.593	0.414	1.20634e-18	L6-Proliferating	AP2M1
LCP11	1.29507e-22	0.344492	0.771	0.671	1.89145e-18	L6-Proliferating	LCP1
C1QBP	3.38417e-22	0.329799	0.473	0.322	4.94258e-18	L6-Proliferating	C1QBP
S100A61	1.07007e-07	0.395532	0.802	0.745	0.00156284	L6-Proliferating	S100A6
BANK1	0	1.37307	0.317	0.012	0	L7-pDC-Bcells	BANK1
BCL11A	0	1.33001	0.45	0.016	0	L7-pDC-Bcells	BCL11A
PPP1R14A	8.26116e-226	0.881665	0.26	0.011	1.20654e-221	L7-pDC-Bcells	PPP1R14A
AFF3	8.25417e-221	0.7537	0.313	0.018	1.20552e-216	L7-pDC-Bcells	AFF3
MAP1A	1.29073e-198	0.944185	0.26	0.013	1.88512e-194	L7-pDC-Bcells	MAP1A
JCHAIN	2.03868e-194	1.86086	0.275	0.016	2.9775e-190	L7-pDC-Bcells	JCHAIN
SPIB	2.62931e-193	1.193	0.435	0.043	3.8401e-189	L7-pDC-Bcells	SPIB
CD79A	3.01157e-168	1.73137	0.317	0.025	4.3984e-164	L7-pDC-Bcells	CD79A
IL3RA	3.125e-153	1.16585	0.294	0.024	4.56407e-149	L7-pDC-Bcells	IL3RA
TSPAN13	1.1224e-149	1.18181	0.344	0.034	1.63927e-145	L7-pDC-Bcells	TSPAN13
DERL3	1.33259e-138	1.06108	0.279	0.024	1.94625e-134	L7-pDC-Bcells	DERL3
LILRA4	5.55344e-136	1.2658	0.271	0.023	8.1108e-132	L7-pDC-Bcells	LILRA4
TCF4	6.38374e-99	1.58067	0.561	0.144	9.32345e-95	L7-pDC-Bcells	TCF4
IGKC	5.77516e-97	1.29315	0.504	0.111	8.43462e-93	L7-pDC-Bcells	IGKC
RALGPS2	1.42065e-81	1.1051	0.305	0.049	2.07486e-77	L7-pDC-Bcells	RALGPS2
IGHM	3.69035e-69	1.43091	0.275	0.044	5.38976e-65	L7-pDC-Bcells	IGHM
IRF8	1.88087e-68	1.51499	0.561	0.195	2.74701e-64	L7-pDC-Bcells	IRF8
HLA-DRA	9.15639e-68	1.01412	0.947	0.765	1.33729e-63	L7-pDC-Bcells	HLA-DRA
GAPT	2.48027e-65	0.622255	0.328	0.067	3.62243e-61	L7-pDC-Bcells	GAPT
WDFY4	1.79342e-64	0.685537	0.313	0.062	2.61929e-60	L7-pDC-Bcells	WDFY4
HLA-DQB1	3.75745e-60	1.04545	0.836	0.506	5.48776e-56	L7-pDC-Bcells	HLA-DQB1
SMIM14	1.04233e-59	0.920987	0.42	0.116	1.52233e-55	L7-pDC-Bcells	SMIM14
HLA-DQA1	1.60668e-58	1.11661	0.798	0.452	2.34656e-54	L7-pDC-Bcells	HLA-DQA1
CD74	3.58749e-58	0.915192	0.985	0.886	5.23953e-54	L7-pDC-Bcells	CD74
CCDC50	1.24472e-52	1.11774	0.527	0.205	1.81791e-48	L7-pDC-Bcells	CCDC50
BLNK	1.24476e-49	0.593271	0.302	0.071	1.81797e-45	L7-pDC-Bcells	BLNK
2021-03-01	3.5551e-49	0.824273	0.412	0.127	5.19223e-45	L7-pDC-Bcells	2021-03-01
CYB561A3	5.30556e-49	0.874759	0.427	0.142	7.74877e-45	L7-pDC-Bcells	CYB561A3
MPEG1	2.52939e-47	0.703603	0.309	0.078	3.69417e-43	L7-pDC-Bcells	MPEG1
MEF2C	9.8347e-46	0.74986	0.55	0.217	1.43636e-41	L7-pDC-Bcells	MEF2C
CXXC5	6.61079e-45	0.523425	0.294	0.071	9.65505e-41	L7-pDC-Bcells	CXXC5
HLA-DRB1	2.62262e-44	0.770615	0.901	0.719	3.83033e-40	L7-pDC-Bcells	HLA-DRB1
HLA-DPA1	1.46105e-43	0.756942	0.908	0.709	2.13386e-39	L7-pDC-Bcells	HLA-DPA1
HLA-DPB1	7.49102e-43	0.844698	0.885	0.709	1.09406e-38	L7-pDC-Bcells	HLA-DPB1
MZB1	2.71528e-42	0.778938	0.309	0.083	3.96567e-38	L7-pDC-Bcells	MZB1
HVCN1	4.74087e-39	0.616574	0.317	0.092	6.92405e-35	L7-pDC-Bcells	HVCN1
APP	3.31873e-37	0.993471	0.324	0.103	4.84701e-33	L7-pDC-Bcells	APP
TRAF4	1.26989e-35	0.715911	0.309	0.092	1.85467e-31	L7-pDC-Bcells	TRAF4
PLAC81	4.57494e-35	1.19086	0.485	0.219	6.6817e-31	L7-pDC-Bcells	PLAC8
SPINT2	5.96988e-35	0.638638	0.427	0.174	8.71902e-31	L7-pDC-Bcells	SPINT2
SOX4	1.03006e-34	1.42185	0.294	0.088	1.50441e-30	L7-pDC-Bcells	SOX4
ARHGAP24	1.15545e-34	0.70722	0.351	0.12	1.68753e-30	L7-pDC-Bcells	ARHGAP24
SELL	1.01472e-33	0.757968	0.489	0.214	1.482e-29	L7-pDC-Bcells	SELL
HLA-DMA	4.10421e-32	0.654803	0.725	0.427	5.99419e-28	L7-pDC-Bcells	HLA-DMA
PHACTR1	3.42746e-30	0.704608	0.347	0.126	5.00581e-26	L7-pDC-Bcells	PHACTR1
CIITA	8.82824e-30	0.684729	0.355	0.136	1.28936e-25	L7-pDC-Bcells	CIITA
LYN	1.32462e-27	0.635268	0.443	0.198	1.9346e-23	L7-pDC-Bcells	LYN
CD37	1.64674e-27	0.855395	0.817	0.67	2.40506e-23	L7-pDC-Bcells	CD37
GRASP	2.74466e-27	0.875403	0.401	0.174	4.00858e-23	L7-pDC-Bcells	GRASP
HLA-DMB	1.16653e-26	0.545926	0.611	0.323	1.70372e-22	L7-pDC-Bcells	HLA-DMB
STX7	2.02283e-26	0.668435	0.431	0.199	2.95435e-22	L7-pDC-Bcells	STX7
IRF4	1.14648e-25	1.1634	0.34	0.14	1.67444e-21	L7-pDC-Bcells	IRF4
SEL1L3	1.18652e-25	0.616286	0.401	0.179	1.73292e-21	L7-pDC-Bcells	SEL1L3
FCHSD2	1.80472e-25	0.581528	0.378	0.162	2.63579e-21	L7-pDC-Bcells	FCHSD2
ST6GALNAC4	4.40874e-25	0.346174	0.26	0.085	6.43896e-21	L7-pDC-Bcells	ST6GALNAC4
SERPINF1	4.53679e-25	1.08677	0.366	0.162	6.62598e-21	L7-pDC-Bcells	SERPINF1
SYK	6.88184e-25	0.634498	0.344	0.143	1.00509e-20	L7-pDC-Bcells	SYK
PLD4	2.16514e-24	0.971771	0.385	0.177	3.16218e-20	L7-pDC-Bcells	PLD4
CYBB	9.28718e-24	0.641451	0.473	0.233	1.35639e-19	L7-pDC-Bcells	CYBB
CD83	2.98213e-22	0.908548	0.569	0.328	4.3554e-18	L7-pDC-Bcells	CD83
SYNGR2	3.12308e-22	0.711104	0.576	0.34	4.56126e-18	L7-pDC-Bcells	SYNGR2
SMARCB1	1.07693e-21	0.493543	0.473	0.248	1.57285e-17	L7-pDC-Bcells	SMARCB1
PIK3AP1	1.52327e-21	0.449072	0.34	0.147	2.22473e-17	L7-pDC-Bcells	PIK3AP1
RUBCN	1.83086e-21	0.496948	0.317	0.131	2.67396e-17	L7-pDC-Bcells	RUBCN
CD40	1.83305e-21	0.54747	0.252	0.093	2.67716e-17	L7-pDC-Bcells	CD40
RNASE6	1.95857e-21	0.566525	0.408	0.199	2.86049e-17	L7-pDC-Bcells	RNASE6
EEF1B2	2.10282e-21	0.587637	0.824	0.764	3.07117e-17	L7-pDC-Bcells	EEF1B2
GNG7	6.70528e-21	0.601847	0.286	0.114	9.79307e-17	L7-pDC-Bcells	GNG7
FGD2	8.83652e-21	0.372246	0.271	0.104	1.29057e-16	L7-pDC-Bcells	FGD2
CD79B1	2.10466e-20	0.88901	0.332	0.153	3.07386e-16	L7-pDC-Bcells	CD79B
CLN8	2.10876e-20	0.941888	0.374	0.188	3.07985e-16	L7-pDC-Bcells	CLN8
IRF7	3.27299e-20	1.40035	0.469	0.281	4.78021e-16	L7-pDC-Bcells	IRF7
BTK	4.78439e-20	0.423145	0.267	0.104	6.9876e-16	L7-pDC-Bcells	BTK
NCF1	5.10439e-20	0.512156	0.588	0.364	7.45497e-16	L7-pDC-Bcells	NCF1
CTSZ	1.58775e-19	0.518186	0.561	0.332	2.31891e-15	L7-pDC-Bcells	CTSZ
GPR183	3.69519e-19	1.08951	0.645	0.461	5.39683e-15	L7-pDC-Bcells	GPR183
SLC15A4	4.39778e-19	0.543082	0.298	0.129	6.42296e-15	L7-pDC-Bcells	SLC15A4
IDH3A	5.63435e-19	0.376224	0.282	0.115	8.22896e-15	L7-pDC-Bcells	IDH3A
TAGLN21	2.86667e-18	0.623668	0.702	0.546	4.18677e-14	L7-pDC-Bcells	TAGLN2
UNC93B1	4.7851e-18	0.554907	0.378	0.196	6.98864e-14	L7-pDC-Bcells	UNC93B1
CTSH	1.0834e-17	0.587011	0.469	0.263	1.5823e-13	L7-pDC-Bcells	CTSH
DAAM1	1.28504e-17	0.401283	0.275	0.116	1.8768e-13	L7-pDC-Bcells	DAAM1
PRKCB	2.26043e-17	0.528143	0.496	0.295	3.30136e-13	L7-pDC-Bcells	PRKCB
RACK1	2.26183e-17	0.335292	0.897	0.845	3.3034e-13	L7-pDC-Bcells	RACK1
CTSS	2.31049e-17	0.464961	0.676	0.477	3.37448e-13	L7-pDC-Bcells	CTSS
UGCG	4.74434e-17	0.693029	0.382	0.211	6.9291e-13	L7-pDC-Bcells	UGCG
EEF1A1	7.03029e-17	0.331553	0.966	0.957	1.02677e-12	L7-pDC-Bcells	EEF1A1
UBE2J1	2.57378e-16	0.481695	0.408	0.23	3.75901e-12	L7-pDC-Bcells	UBE2J1
SWAP70	2.86336e-16	0.710056	0.321	0.156	4.18194e-12	L7-pDC-Bcells	SWAP70
GAS6	3.20337e-16	0.460575	0.286	0.129	4.67852e-12	L7-pDC-Bcells	GAS6
CDYL	3.88281e-16	0.388914	0.286	0.13	5.67085e-12	L7-pDC-Bcells	CDYL
ERP29	5.761e-16	0.484979	0.645	0.539	8.41394e-12	L7-pDC-Bcells	ERP29
PPP1R14B1	6.53133e-16	1.12626	0.42	0.255	9.539e-12	L7-pDC-Bcells	PPP1R14B
EEF2	2.09678e-15	0.461003	0.821	0.74	3.06234e-11	L7-pDC-Bcells	EEF2
CORO1C	2.29458e-15	0.578957	0.305	0.152	3.35124e-11	L7-pDC-Bcells	CORO1C
RAB11FIP11	3.27709e-15	0.681327	0.447	0.274	4.78618e-11	L7-pDC-Bcells	RAB11FIP1
STRBP	3.92276e-15	0.39086	0.267	0.117	5.7292e-11	L7-pDC-Bcells	STRBP
SNX2	4.01891e-15	0.605789	0.45	0.272	5.86961e-11	L7-pDC-Bcells	SNX2
THEMIS2	7.26592e-15	0.513342	0.427	0.25	1.06119e-10	L7-pDC-Bcells	THEMIS2
UVRAG	1.06295e-14	0.493969	0.347	0.181	1.55244e-10	L7-pDC-Bcells	UVRAG
LTB2	1.30372e-14	0.67904	0.634	0.469	1.90409e-10	L7-pDC-Bcells	LTB
POU2F2	3.50541e-14	0.659795	0.393	0.233	5.11964e-10	L7-pDC-Bcells	POU2F2
HERPUD1	3.91291e-14	0.619174	0.752	0.667	5.71481e-10	L7-pDC-Bcells	HERPUD1
C12orf45	5.13112e-14	0.433618	0.286	0.139	7.49399e-10	L7-pDC-Bcells	C12orf45
PTPN1	9.26177e-14	0.47895	0.538	0.361	1.35268e-09	L7-pDC-Bcells	PTPN1
EIF1AY	1.80706e-13	0.486393	0.336	0.179	2.63921e-09	L7-pDC-Bcells	EIF1AY
ITM2C1	2.43623e-13	0.823372	0.485	0.345	3.55812e-09	L7-pDC-Bcells	ITM2C
NFKBID	4.60593e-13	0.448254	0.351	0.19	6.72697e-09	L7-pDC-Bcells	NFKBID
EZR	6.35792e-13	0.631071	0.718	0.599	9.28574e-09	L7-pDC-Bcells	EZR
CNPY3	7.27451e-13	0.553374	0.538	0.368	1.06244e-08	L7-pDC-Bcells	CNPY3
SNX91	9.16772e-13	0.524188	0.401	0.24	1.33895e-08	L7-pDC-Bcells	SNX9
PPM1K	1.0268e-12	0.416352	0.489	0.318	1.49964e-08	L7-pDC-Bcells	PPM1K
KDM6B	1.33336e-12	0.587264	0.508	0.331	1.94738e-08	L7-pDC-Bcells	KDM6B
DAPP1	1.78536e-12	0.424037	0.252	0.12	2.60751e-08	L7-pDC-Bcells	DAPP1
ATG101	1.88494e-12	0.452369	0.363	0.209	2.75295e-08	L7-pDC-Bcells	ATG101
SEC61B	2.94392e-12	0.971394	0.653	0.564	4.2996e-08	L7-pDC-Bcells	SEC61B
NR4A1	4.19669e-12	0.592154	0.603	0.405	6.12927e-08	L7-pDC-Bcells	NR4A1
SNX3	4.5776e-12	0.405301	0.588	0.448	6.68558e-08	L7-pDC-Bcells	SNX3
NACA	5.92381e-12	0.324608	0.847	0.836	8.65172e-08	L7-pDC-Bcells	NACA
NGLY1	6.06617e-12	0.479765	0.366	0.212	8.85964e-08	L7-pDC-Bcells	NGLY1
GRN	9.68422e-12	0.32961	0.527	0.347	1.41438e-07	L7-pDC-Bcells	GRN
SNHG7	9.85256e-12	0.374239	0.515	0.354	1.43897e-07	L7-pDC-Bcells	SNHG7
GNL3	1.15019e-11	0.564242	0.382	0.231	1.67985e-07	L7-pDC-Bcells	GNL3
VEGFB	7.11314e-11	0.331361	0.298	0.166	1.03887e-06	L7-pDC-Bcells	VEGFB
SELENOH	8.52412e-11	0.372982	0.626	0.473	1.24495e-06	L7-pDC-Bcells	SELENOH
CD164	9.75244e-11	0.496439	0.588	0.464	1.42434e-06	L7-pDC-Bcells	CD164
ETV6	2.27392e-10	0.498979	0.309	0.178	3.32106e-06	L7-pDC-Bcells	ETV6
CD551	3.15124e-10	0.43765	0.546	0.383	4.60238e-06	L7-pDC-Bcells	CD55
LY9	4.06955e-10	0.430454	0.267	0.14	5.94358e-06	L7-pDC-Bcells	LY9
SNRNP251	4.21078e-10	0.356382	0.294	0.165	6.14984e-06	L7-pDC-Bcells	SNRNP25
CST3	4.71415e-10	0.683268	0.626	0.498	6.88502e-06	L7-pDC-Bcells	CST3
CAPG	6.96987e-10	0.365011	0.595	0.428	1.01795e-05	L7-pDC-Bcells	CAPG
SERP1	9.43024e-10	0.388841	0.718	0.607	1.37729e-05	L7-pDC-Bcells	SERP1
CD2AP	1.17884e-09	0.435817	0.317	0.195	1.72169e-05	L7-pDC-Bcells	CD2AP
BCL2L11	1.60198e-09	0.323534	0.363	0.223	2.3397e-05	L7-pDC-Bcells	BCL2L11
TIMM13	1.69751e-09	0.399001	0.416	0.272	2.47921e-05	L7-pDC-Bcells	TIMM13
PMEPA1	1.75027e-09	0.495046	0.271	0.154	2.55627e-05	L7-pDC-Bcells	PMEPA1
LDLRAD4	2.2452e-09	0.799708	0.42	0.305	3.27912e-05	L7-pDC-Bcells	LDLRAD4
EIF2AK4	2.9425e-09	0.331099	0.294	0.171	4.29752e-05	L7-pDC-Bcells	EIF2AK4
GGA2	3.93465e-09	0.323251	0.424	0.28	5.74656e-05	L7-pDC-Bcells	GGA2
YPEL5	4.62443e-09	0.349256	0.676	0.561	6.75397e-05	L7-pDC-Bcells	YPEL5
APEX1	5.27646e-09	0.362478	0.458	0.329	7.70626e-05	L7-pDC-Bcells	APEX1
SINHCAF	6.15532e-09	0.357206	0.336	0.206	8.98985e-05	L7-pDC-Bcells	SINHCAF
C1QBP1	7.37416e-09	0.384791	0.458	0.33	0.0001077	L7-pDC-Bcells	C1QBP
SPCS1	7.51433e-09	0.497151	0.599	0.523	0.000109747	L7-pDC-Bcells	SPCS1
CXCR31	1.49788e-08	0.6601	0.393	0.276	0.000218765	L7-pDC-Bcells	CXCR3
DCK	1.53505e-08	0.356088	0.363	0.239	0.000224194	L7-pDC-Bcells	DCK
ADAM28	2.31195e-08	0.45453	0.271	0.159	0.00033766	L7-pDC-Bcells	ADAM28
AREG1	2.393e-08	1.37132	0.439	0.342	0.000349497	L7-pDC-Bcells	AREG
BASP1	3.62823e-08	0.411964	0.336	0.208	0.000529903	L7-pDC-Bcells	BASP1
PLEK	4.65857e-08	0.368525	0.443	0.314	0.000680384	L7-pDC-Bcells	PLEK
SELENOS	4.98274e-08	0.490031	0.431	0.323	0.000727729	L7-pDC-Bcells	SELENOS
HSP90B1	4.98669e-08	0.62653	0.611	0.555	0.000728306	L7-pDC-Bcells	HSP90B1
SH2B3	5.89371e-08	0.445523	0.26	0.151	0.000860776	L7-pDC-Bcells	SH2B3
DRAM2	6.63601e-08	0.422364	0.34	0.22	0.00096919	L7-pDC-Bcells	DRAM2
TGFBI	6.79627e-08	0.391692	0.305	0.183	0.000992596	L7-pDC-Bcells	TGFBI
PTPN6	6.99731e-08	0.362529	0.466	0.33	0.00102196	L7-pDC-Bcells	PTPN6
HINT1	7.13595e-08	0.336798	0.748	0.687	0.00104221	L7-pDC-Bcells	HINT1
CLINT1	7.21919e-08	0.334358	0.424	0.299	0.00105436	L7-pDC-Bcells	CLINT1
CCR7	8.06869e-08	0.403492	0.263	0.151	0.00117843	L7-pDC-Bcells	CCR7
CLIC31	8.53468e-08	1.02708	0.324	0.221	0.00124649	L7-pDC-Bcells	CLIC3
CUX1	9.16374e-08	0.34316	0.305	0.193	0.00133836	L7-pDC-Bcells	CUX1
ORAI2	9.30224e-08	0.425556	0.298	0.189	0.00135859	L7-pDC-Bcells	ORAI2
SRP14	9.52454e-08	0.401365	0.752	0.743	0.00139106	L7-pDC-Bcells	SRP14
RGS2	9.56465e-08	0.780558	0.576	0.506	0.00139692	L7-pDC-Bcells	RGS2
NPC2	1.44076e-07	0.407145	0.653	0.521	0.00210423	L7-pDC-Bcells	NPC2
CCDC88A	1.4979e-07	0.573169	0.328	0.222	0.00218769	L7-pDC-Bcells	CCDC88A
EIF3L	1.64027e-07	0.377713	0.576	0.473	0.00239562	L7-pDC-Bcells	EIF3L
ODC1	1.65922e-07	0.412566	0.347	0.237	0.00242329	L7-pDC-Bcells	ODC1
ALDH2	1.81059e-07	0.351886	0.317	0.203	0.00264437	L7-pDC-Bcells	ALDH2
CDKN2D1	1.91359e-07	0.333469	0.286	0.174	0.0027948	L7-pDC-Bcells	CDKN2D
GNA151	2.05515e-07	0.450683	0.279	0.171	0.00300155	L7-pDC-Bcells	GNA15
PNISR	2.15834e-07	0.336113	0.74	0.65	0.00315226	L7-pDC-Bcells	PNISR
PTPRE	2.21993e-07	0.555555	0.405	0.303	0.0032422	L7-pDC-Bcells	PTPRE
LILRB4	2.33642e-07	0.378279	0.351	0.233	0.00341234	L7-pDC-Bcells	LILRB4
DUSP5	3.25593e-07	0.49971	0.347	0.239	0.00475529	L7-pDC-Bcells	DUSP5
ZNF706	3.31866e-07	0.327306	0.531	0.416	0.0048469	L7-pDC-Bcells	ZNF706
SND1	4.30555e-07	0.367654	0.328	0.218	0.00628825	L7-pDC-Bcells	SND1
IRF2BP2	4.6546e-07	0.43754	0.447	0.338	0.00679804	L7-pDC-Bcells	IRF2BP2
FYTTD1	4.67024e-07	0.34063	0.37	0.258	0.00682088	L7-pDC-Bcells	FYTTD1
IQSEC1	4.90429e-07	0.384426	0.271	0.166	0.00716272	L7-pDC-Bcells	IQSEC1
DDX21	5.0021e-07	0.352186	0.573	0.461	0.00730557	L7-pDC-Bcells	DDX21
MDM4	5.03422e-07	0.35103	0.469	0.343	0.00735248	L7-pDC-Bcells	MDM4
CAT	6.15943e-07	0.409676	0.309	0.206	0.00899584	L7-pDC-Bcells	CAT
PHB	6.41641e-07	0.397363	0.435	0.331	0.00937117	L7-pDC-Bcells	PHB
CMTM6	8.86155e-07	0.389309	0.485	0.373	0.0129423	L7-pDC-Bcells	CMTM6
MOB1A	1.8408e-06	0.365633	0.534	0.428	0.0268849	L7-pDC-Bcells	MOB1A
RCSD1	1.84777e-06	0.4308	0.511	0.4	0.0269866	L7-pDC-Bcells	RCSD1
LY86	2.00532e-06	0.436912	0.328	0.221	0.0292876	L7-pDC-Bcells	LY86
SYPL1	2.42512e-06	0.39722	0.309	0.212	0.0354189	L7-pDC-Bcells	SYPL1
PLP21	2.44841e-06	0.39167	0.538	0.45	0.035759	L7-pDC-Bcells	PLP2
HIGD1A	2.47991e-06	0.371034	0.252	0.157	0.036219	L7-pDC-Bcells	HIGD1A
REL	3.19064e-06	0.458543	0.71	0.594	0.0465994	L7-pDC-Bcells	REL
SMIM3	3.70504e-06	0.418848	0.275	0.185	0.0541121	L7-pDC-Bcells	SMIM3
RERE	4.78456e-06	0.376798	0.313	0.212	0.0698785	L7-pDC-Bcells	RERE
RIPOR21	6.27601e-06	0.373088	0.466	0.342	0.0916612	L7-pDC-Bcells	RIPOR2
SFT2D2	1.11107e-05	0.3482	0.321	0.225	0.162272	L7-pDC-Bcells	SFT2D2
GRB2	1.38881e-05	0.34804	0.561	0.44	0.202836	L7-pDC-Bcells	GRB2
NFKB2	3.64775e-05	0.347947	0.313	0.223	0.532754	L7-pDC-Bcells	NFKB2
DBI	3.77907e-05	0.331427	0.645	0.581	0.551933	L7-pDC-Bcells	DBI
N4BP2L1	4.0429e-05	0.336844	0.313	0.227	0.590465	L7-pDC-Bcells	N4BP2L1
NR4A3	5.65584e-05	0.456097	0.34	0.255	0.826035	L7-pDC-Bcells	NR4A3
PTRHD1	9.19227e-05	0.337403	0.336	0.252	1	L7-pDC-Bcells	PTRHD1
RRBP1	9.23974e-05	0.541359	0.366	0.298	1	L7-pDC-Bcells	RRBP1
TCOF1	0.000128269	0.384849	0.298	0.218	1	L7-pDC-Bcells	TCOF1
B4GALT1	0.00017457	0.379298	0.401	0.325	1	L7-pDC-Bcells	B4GALT1
GZMB1	0.000488846	1.41641	0.363	0.34	1	L7-pDC-Bcells	GZMB
C12orf751	0.000558223	0.499723	0.416	0.362	1	L7-pDC-Bcells	C12orf75
CHMP1B	0.000602821	0.601869	0.462	0.377	1	L7-pDC-Bcells	CHMP1B
BID	0.000616765	0.336915	0.324	0.257	1	L7-pDC-Bcells	BID
HLA-DRB5	0.000755665	0.395909	0.397	0.321	1	L7-pDC-Bcells	HLA-DRB5
SMAP2	0.00084015	0.324537	0.664	0.587	1	L7-pDC-Bcells	SMAP2
RNF130	0.00104929	0.33344	0.332	0.254	1	L7-pDC-Bcells	RNF130
EIF1B	0.00108829	0.338312	0.458	0.385	1	L7-pDC-Bcells	EIF1B
CD41	0.0027468	0.366098	0.359	0.302	1	L7-pDC-Bcells	CD4
MKNK2	0.00304029	0.331445	0.336	0.273	1	L7-pDC-Bcells	MKNK2
DSTN1	0.0038671	0.464384	0.374	0.334	1	L7-pDC-Bcells	DSTN
TXN2	0.00423983	0.660658	0.515	0.488	1	L7-pDC-Bcells	TXN
MANF	0.00537428	0.359622	0.347	0.297	1	L7-pDC-Bcells	MANF
C1QC	0	1.62917	0.933	0.407	0	L+M-1	C1QC
APOE	0	1.61016	0.964	0.662	0	L+M-1	APOE
C1QB	0	1.50862	0.948	0.525	0	L+M-1	C1QB
APOC1	0	1.47815	0.932	0.473	0	L+M-1	APOC1
CCL3	0	1.46145	0.828	0.459	0	L+M-1	CCL3
C1QA	0	1.44492	0.946	0.515	0	L+M-1	C1QA
CCL3L1	0	1.35777	0.622	0.245	0	L+M-1	CCL3L1
TREM2	0	1.31795	0.816	0.195	0	L+M-1	TREM2
IL1B	0	1.29281	0.658	0.253	0	L+M-1	IL1B
CD14	0	1.28956	0.808	0.237	0	L+M-1	CD14
CST31	0	1.27647	0.928	0.421	0	L+M-1	CST3
CD741	0	1.27423	0.989	0.869	0	L+M-1	CD74
TYROBP1	0	1.20206	0.94	0.489	0	L+M-1	TYROBP
HLA-DRA1	0	1.19909	0.971	0.73	0	L+M-1	HLA-DRA
NPC21	0	1.14252	0.91	0.451	0	L+M-1	NPC2
HLA-DRB11	0	1.10685	0.956	0.679	0	L+M-1	HLA-DRB1
FCER1G	0	1.10602	0.901	0.385	0	L+M-1	FCER1G
SPP1	0	1.08233	0.952	0.679	0	L+M-1	SPP1
HLA-DPA11	0	1.04735	0.952	0.668	0	L+M-1	HLA-DPA1
C3	0	1.04627	0.836	0.261	0	L+M-1	C3
FCGBP	0	1.0372	0.604	0.168	0	L+M-1	FCGBP
CH25H	0	1.03529	0.539	0.164	0	L+M-1	CH25H
RHOB	0	1.01244	0.775	0.32	0	L+M-1	RHOB
SGK1	0	1.00737	0.79	0.318	0	L+M-1	SGK1
VSIG4	0	1.00568	0.727	0.176	0	L+M-1	VSIG4
AIF1	0	0.999035	0.893	0.388	0	L+M-1	AIF1
MAFB	0	0.982603	0.751	0.199	0	L+M-1	MAFB
IER3	0	0.969998	0.735	0.273	0	L+M-1	IER3
FTL	0	0.964196	0.999	0.969	0	L+M-1	FTL
PLTP	0	0.956784	0.56	0.15	0	L+M-1	PLTP
MS4A6A	0	0.956587	0.784	0.225	0	L+M-1	MS4A6A
GRN1	0	0.943019	0.786	0.269	0	L+M-1	GRN
HLA-DPB11	0	0.942909	0.947	0.668	0	L+M-1	HLA-DPB1
RNASET2	0	0.939052	0.92	0.517	0	L+M-1	RNASET2
CEBPD	0	0.919904	0.779	0.321	0	L+M-1	CEBPD
MS4A7	0	0.917716	0.798	0.223	0	L+M-1	MS4A7
HLA-DQA11	0	0.909408	0.823	0.391	0	L+M-1	HLA-DQA1
FCGR1A	0	0.903148	0.708	0.15	0	L+M-1	FCGR1A
FCGR3A1	0	0.899603	0.817	0.284	0	L+M-1	FCGR3A
OLR1	0	0.894902	0.708	0.186	0	L+M-1	OLR1
PLAUR	0	0.868309	0.702	0.214	0	L+M-1	PLAUR
FCGRT	0	0.867766	0.805	0.263	0	L+M-1	FCGRT
SPI1	0	0.867541	0.733	0.188	0	L+M-1	SPI1
HAMP	0	0.866915	0.454	0.102	0	L+M-1	HAMP
CD68	0	0.865472	0.811	0.258	0	L+M-1	CD68
PSAP	0	0.864258	0.921	0.574	0	L+M-1	PSAP
CSF1R	0	0.859922	0.755	0.163	0	L+M-1	CSF1R
HLA-DMA1	0	0.857515	0.839	0.356	0	L+M-1	HLA-DMA
IFITM3	0	0.853207	0.663	0.236	0	L+M-1	IFITM3
CD831	0	0.847573	0.713	0.262	0	L+M-1	CD83
FPR1	0	0.83431	0.661	0.128	0	L+M-1	FPR1
CTSB	0	0.833024	0.912	0.478	0	L+M-1	CTSB
SAT1	0	0.829818	0.974	0.82	0	L+M-1	SAT1
CXCL16	0	0.824863	0.747	0.178	0	L+M-1	CXCL16
HLA-DQB11	0	0.823426	0.857	0.447	0	L+M-1	HLA-DQB1
SLC1A3	0	0.814243	0.684	0.147	0	L+M-1	SLC1A3
LILRB41	0	0.813887	0.689	0.151	0	L+M-1	LILRB4
GSN	0	0.802338	0.763	0.219	0	L+M-1	GSN
SERPINA1	0	0.798602	0.64	0.149	0	L+M-1	SERPINA1
GPR34	0	0.7982	0.669	0.158	0	L+M-1	GPR34
HLA-DMB1	0	0.795831	0.748	0.25	0	L+M-1	HLA-DMB
LST1	0	0.793095	0.746	0.225	0	L+M-1	LST1
C5AR1	0	0.791993	0.625	0.135	0	L+M-1	C5AR1
A2M	0	0.791367	0.741	0.203	0	L+M-1	A2M
LY861	0	0.789928	0.672	0.139	0	L+M-1	LY86
SLC11A1	0	0.786976	0.684	0.163	0	L+M-1	SLC11A1
TMEM176B	0	0.785275	0.62	0.14	0	L+M-1	TMEM176B
MARCKS	0	0.775384	0.751	0.23	0	L+M-1	MARCKS
FCGR2A	0	0.76717	0.732	0.181	0	L+M-1	FCGR2A
OLFML3	0	0.725983	0.544	0.112	0	L+M-1	OLFML3
MS4A4A	0	0.721666	0.652	0.14	0	L+M-1	MS4A4A
FTH1	0	0.71998	0.997	0.952	0	L+M-1	FTH1
PLD41	0	0.715015	0.553	0.111	0	L+M-1	PLD4
TMIGD3	0	0.692749	0.564	0.126	0	L+M-1	TMIGD3
FOLR2	0	0.692447	0.499	0.103	0	L+M-1	FOLR2
C1orf162	0	0.684376	0.714	0.233	0	L+M-1	C1orf162
IL18	0	0.678723	0.626	0.138	0	L+M-1	IL18
PDK4	0	0.676457	0.548	0.154	0	L+M-1	PDK4
CD163	0	0.676236	0.663	0.181	0	L+M-1	CD163
ASAH1	0	0.674925	0.772	0.288	0	L+M-1	ASAH1
CFD	0	0.665108	0.449	0.117	0	L+M-1	CFD
RNASE61	0	0.654087	0.592	0.13	0	L+M-1	RNASE6
NLRP3	0	0.653505	0.5	0.142	0	L+M-1	NLRP3
LTC4S	0	0.64714	0.609	0.135	0	L+M-1	LTC4S
MEF2C1	0	0.644266	0.632	0.147	0	L+M-1	MEF2C
KLF4	0	0.63966	0.584	0.147	0	L+M-1	KLF4
PLXDC2	0	0.633826	0.653	0.146	0	L+M-1	PLXDC2
BCL2A1	0	0.626429	0.601	0.21	0	L+M-1	BCL2A1
BASP11	0	0.617899	0.559	0.146	0	L+M-1	BASP1
CPM	0	0.615122	0.534	0.113	0	L+M-1	CPM
CTSH1	0	0.61436	0.648	0.195	0	L+M-1	CTSH
NINJ1	0	0.614213	0.7	0.257	0	L+M-1	NINJ1
EPB41L2	0	0.613714	0.64	0.163	0	L+M-1	EPB41L2
HBEGF	0	0.613282	0.477	0.127	0	L+M-1	HBEGF
CD63	0	0.605355	0.891	0.547	0	L+M-1	CD63
S100A11	0	0.604874	0.927	0.68	0	L+M-1	S100A11
CSF2RA	0	0.595754	0.566	0.117	0	L+M-1	CSF2RA
C3AR1	0	0.592962	0.609	0.164	0	L+M-1	C3AR1
RAB20	0	0.588762	0.528	0.115	0	L+M-1	RAB20
HMOX1	0	0.588688	0.664	0.203	0	L+M-1	HMOX1
ALDH21	0	0.587287	0.584	0.134	0	L+M-1	ALDH2
CYBB1	0	0.585827	0.621	0.166	0	L+M-1	CYBB
BHLHE41	0	0.580659	0.482	0.104	0	L+M-1	BHLHE41
VSIR	0	0.57784	0.764	0.348	0	L+M-1	VSIR
IGSF6	0	0.577838	0.553	0.131	0	L+M-1	IGSF6
IFNGR2	0	0.575898	0.611	0.14	0	L+M-1	IFNGR2
RNF1301	0	0.57359	0.656	0.181	0	L+M-1	RNF130
CALHM6	0	0.567069	0.436	0.108	0	L+M-1	CALHM6
ADAP2	0	0.566523	0.576	0.119	0	L+M-1	ADAP2
TBXAS1	0	0.566371	0.616	0.144	0	L+M-1	TBXAS1
GLUL	0	0.561045	0.852	0.445	0	L+M-1	GLUL
CPVL	0	0.560617	0.564	0.12	0	L+M-1	CPVL
RASSF4	0	0.555995	0.595	0.157	0	L+M-1	RASSF4
SLC2A5	0	0.554415	0.537	0.099	0	L+M-1	SLC2A5
CLEC7A	0	0.554181	0.576	0.135	0	L+M-1	CLEC7A
CYFIP1	0	0.533942	0.517	0.137	0	L+M-1	CYFIP1
TLR2	0	0.53007	0.544	0.103	0	L+M-1	TLR2
SLCO2B1	0	0.52879	0.622	0.133	0	L+M-1	SLCO2B1
VMO1	0	0.527896	0.403	0.066	0	L+M-1	VMO1
CREG1	0	0.5253	0.616	0.184	0	L+M-1	CREG1
SERPINF11	0	0.524481	0.504	0.103	0	L+M-1	SERPINF1
SCIN	0	0.523827	0.476	0.105	0	L+M-1	SCIN
TNFSF13B	0	0.521355	0.562	0.175	0	L+M-1	TNFSF13B
KCTD12	0	0.520396	0.615	0.153	0	L+M-1	KCTD12
LGMN	0	0.518754	0.571	0.159	0	L+M-1	LGMN
RAB31	0	0.512581	0.593	0.143	0	L+M-1	RAB31
SYNGR21	0	0.511388	0.692	0.279	0	L+M-1	SYNGR2
GAA	0	0.510421	0.579	0.128	0	L+M-1	GAA
ADORA3	0	0.504191	0.442	0.08	0	L+M-1	ADORA3
GRINA	0	0.501847	0.612	0.195	0	L+M-1	GRINA
LGALS9	0	0.500257	0.66	0.234	0	L+M-1	LGALS9
DAB2	0	0.497558	0.548	0.133	0	L+M-1	DAB2
GPNMB	0	0.495107	0.452	0.118	0	L+M-1	GPNMB
FCGR1B	0	0.493144	0.433	0.073	0	L+M-1	FCGR1B
TMEM176A	0	0.489755	0.465	0.091	0	L+M-1	TMEM176A
CD86	0	0.48916	0.529	0.114	0	L+M-1	CD86
ETS2	0	0.484687	0.564	0.175	0	L+M-1	ETS2
MSR1	0	0.483441	0.572	0.13	0	L+M-1	MSR1
SLC31A2	0	0.483158	0.499	0.112	0	L+M-1	SLC31A2
PILRA	0	0.483122	0.464	0.084	0	L+M-1	PILRA
HTRA1	0	0.481165	0.493	0.1	0	L+M-1	HTRA1
CSF3R	0	0.480633	0.519	0.101	0	L+M-1	CSF3R
LPCAT2	0	0.480476	0.495	0.102	0	L+M-1	LPCAT2
CNPY31	0	0.469439	0.739	0.302	0	L+M-1	CNPY3
ACSL1	0	0.46477	0.596	0.166	0	L+M-1	ACSL1
LAIR1	0	0.464762	0.627	0.198	0	L+M-1	LAIR1
CTSL	0	0.464632	0.634	0.193	0	L+M-1	CTSL
CD9	0	0.461877	0.474	0.112	0	L+M-1	CD9
AXL	0	0.459598	0.458	0.09	0	L+M-1	AXL
LY96	0	0.458842	0.534	0.148	0	L+M-1	LY96
PADI2	0	0.456495	0.425	0.079	0	L+M-1	PADI2
SCPEP1	0	0.455977	0.549	0.155	0	L+M-1	SCPEP1
MFSD1	0	0.454009	0.62	0.184	0	L+M-1	MFSD1
STAB1	0	0.44536	0.477	0.12	0	L+M-1	STAB1
SIGLEC10	0	0.438162	0.479	0.107	0	L+M-1	SIGLEC10
IFI30	0	0.437547	0.41	0.097	0	L+M-1	IFI30
C1orf54	0	0.432124	0.456	0.091	0	L+M-1	C1orf54
THEMIS21	0	0.423896	0.588	0.191	0	L+M-1	THEMIS2
LRP1	0	0.421774	0.438	0.094	0	L+M-1	LRP1
LAT2	0	0.421065	0.528	0.146	0	L+M-1	LAT2
CD302	0	0.419789	0.484	0.099	0	L+M-1	CD302
CSTA	0	0.413535	0.377	0.078	0	L+M-1	CSTA
TMEM119	0	0.409793	0.363	0.059	0	L+M-1	TMEM119
IL13RA1	0	0.407551	0.486	0.114	0	L+M-1	IL13RA1
KCNMA1	0	0.403185	0.39	0.083	0	L+M-1	KCNMA1
ZFHX3	0	0.402961	0.428	0.095	0	L+M-1	ZFHX3
ANKRD22	0	0.400038	0.369	0.079	0	L+M-1	ANKRD22
HCK	0	0.391276	0.454	0.096	0	L+M-1	HCK
MGST2	0	0.388514	0.508	0.127	0	L+M-1	MGST2
SLC7A7	0	0.385762	0.432	0.093	0	L+M-1	SLC7A7
PDGFB	0	0.385421	0.357	0.075	0	L+M-1	PDGFB
MERTK	0	0.38102	0.417	0.088	0	L+M-1	MERTK
DOCK4	0	0.378377	0.433	0.097	0	L+M-1	DOCK4
ADAM281	0	0.3674	0.441	0.109	0	L+M-1	ADAM28
LHFPL2	0	0.36641	0.433	0.099	0	L+M-1	LHFPL2
ARHGAP241	0	0.360312	0.375	0.077	0	L+M-1	ARHGAP24
GAL3ST4	0	0.358235	0.369	0.07	0	L+M-1	GAL3ST4
FGD4	0	0.357106	0.42	0.091	0	L+M-1	FGD4
MNDA	0	0.355962	0.47	0.124	0	L+M-1	MNDA
METTL7A	0	0.348807	0.41	0.1	0	L+M-1	METTL7A
PALD1	0	0.342848	0.377	0.081	0	L+M-1	PALD1
HNMT	0	0.336	0.389	0.081	0	L+M-1	HNMT
PTAFR	0	0.335187	0.389	0.083	0	L+M-1	PTAFR
RNASE2	0	0.333659	0.33	0.058	0	L+M-1	RNASE2
TIMP2	0	0.331331	0.461	0.119	0	L+M-1	TIMP2
TM6SF1	0	0.32218	0.407	0.089	0	L+M-1	TM6SF1
CTSZ1	1.4715e-306	0.438327	0.688	0.27	2.14913e-302	L+M-1	CTSZ
SERPINB6	1.55721e-306	0.347433	0.57	0.185	2.27431e-302	L+M-1	SERPINB6
NR4A11	9.48112e-304	0.579969	0.754	0.344	1.38472e-299	L+M-1	NR4A1
UNC93B11	1.2389e-303	0.328997	0.492	0.145	1.80941e-299	L+M-1	UNC93B1
SLC43A2	3.42338e-303	0.3261	0.388	0.09	4.99985e-299	L+M-1	SLC43A2
CAPG1	9.05223e-301	0.498683	0.783	0.365	1.32208e-296	L+M-1	CAPG
TGFBI1	7.03673e-300	0.395563	0.473	0.132	1.02771e-295	L+M-1	TGFBI
AKR1B1	9.76134e-300	0.475621	0.685	0.281	1.42564e-295	L+M-1	AKR1B1
YWHAH	1.94871e-299	0.530016	0.734	0.324	2.84609e-295	L+M-1	YWHAH
SLC16A3	7.02606e-299	0.4677	0.629	0.232	1.02616e-294	L+M-1	SLC16A3
RNF144B	1.94864e-298	0.324749	0.396	0.097	2.84599e-294	L+M-1	RNF144B
FGL2	9.08406e-296	0.419761	0.533	0.162	1.32673e-291	L+M-1	FGL2
DSE	1.65383e-294	0.335314	0.462	0.127	2.41541e-290	L+M-1	DSE
TRIB1	3.75548e-294	0.388874	0.421	0.113	5.48488e-290	L+M-1	TRIB1
CX3CR1	4.48107e-293	0.393794	0.388	0.094	6.54461e-289	L+M-1	CX3CR1
PPT1	1.22445e-290	0.435385	0.651	0.25	1.7883e-286	L+M-1	PPT1
SERPING1	2.75815e-288	0.474702	0.373	0.092	4.02828e-284	L+M-1	SERPING1
APLP2	6.0326e-286	0.417865	0.64	0.236	8.81062e-282	L+M-1	APLP2
NUPR1	1.47961e-284	0.455927	0.42	0.112	2.16096e-280	L+M-1	NUPR1
NUDT16	1.67848e-283	0.352037	0.473	0.141	2.45142e-279	L+M-1	NUDT16
SLC25A37	4.87469e-277	0.388682	0.528	0.175	7.11948e-273	L+M-1	SLC25A37
SRGAP1	1.261e-276	0.346384	0.34	0.075	1.84169e-272	L+M-1	SRGAP1
RGS10	5.34909e-276	0.519881	0.857	0.499	7.81234e-272	L+M-1	RGS10
ABHD12	1.00701e-268	0.353407	0.496	0.161	1.47074e-264	L+M-1	ABHD12
RAC1	3.62997e-267	0.543101	0.839	0.488	5.30157e-263	L+M-1	RAC1
PLD3	1.96711e-266	0.356129	0.57	0.206	2.87297e-262	L+M-1	PLD3
ITGAX	2.37307e-264	0.343657	0.426	0.118	3.46587e-260	L+M-1	ITGAX
LGALS3BP	1.11672e-263	0.563296	0.492	0.167	1.63097e-259	L+M-1	LGALS3BP
RHBDF2	1.32939e-263	0.329311	0.556	0.196	1.94157e-259	L+M-1	RHBDF2
APOC2	3.24831e-262	0.345677	0.257	0.045	4.74415e-258	L+M-1	APOC2
ITM2B	4.11018e-260	0.502546	0.946	0.768	6.00292e-256	L+M-1	ITM2B
FCGR2B	6.12406e-260	0.331986	0.292	0.06	8.94419e-256	L+M-1	FCGR2B
P2RY13	2.66905e-255	0.374049	0.315	0.072	3.89815e-251	L+M-1	P2RY13
LAPTM4A	1.1431e-254	0.392071	0.71	0.317	1.6695e-250	L+M-1	LAPTM4A
SPTLC2	3.09366e-250	0.378344	0.543	0.197	4.51829e-246	L+M-1	SPTLC2
CXCL8	1.20865e-249	0.893515	0.484	0.163	1.76523e-245	L+M-1	CXCL8
VEGFA	8.92863e-246	0.334041	0.378	0.1	1.30403e-241	L+M-1	VEGFA
CCL4L2	3.43333e-244	1.03986	0.719	0.379	5.01438e-240	L+M-1	CCL4L2
ALOX5AP	8.20521e-244	0.512451	0.869	0.523	1.19837e-239	L+M-1	ALOX5AP
HAVCR2	4.7274e-243	0.337792	0.66	0.267	6.90437e-239	L+M-1	HAVCR2
CTSS1	5.73855e-243	0.458001	0.802	0.42	8.38116e-239	L+M-1	CTSS
MEF2A	3.19611e-242	0.377345	0.593	0.227	4.66792e-238	L+M-1	MEF2A
ICAM1	1.15457e-238	0.394872	0.457	0.15	1.68624e-234	L+M-1	ICAM1
HLA-DRB51	1.27213e-231	0.943751	0.586	0.273	1.85795e-227	L+M-1	HLA-DRB5
SRGAP2	7.62708e-231	0.369125	0.486	0.17	1.11393e-226	L+M-1	SRGAP2
OGFRL1	6.17864e-228	0.399212	0.554	0.21	9.02391e-224	L+M-1	OGFRL1
OSM	3.28264e-227	0.405922	0.396	0.12	4.79429e-223	L+M-1	OSM
DNASE2	1.22214e-226	0.32313	0.538	0.203	1.78494e-222	L+M-1	DNASE2
PYCARD	4.45239e-225	0.38185	0.74	0.359	6.50272e-221	L+M-1	PYCARD
RGS16	2.1019e-223	0.478022	0.408	0.129	3.06982e-219	L+M-1	RGS16
GPX4	2.7566e-222	0.407445	0.857	0.513	4.02602e-218	L+M-1	GPX4
NR4A31	5.72402e-222	0.355641	0.542	0.203	8.35994e-218	L+M-1	NR4A3
CDKN1A	3.77634e-221	0.36133	0.621	0.261	5.51534e-217	L+M-1	CDKN1A
S100A8	4.12982e-221	0.687266	0.397	0.123	6.0316e-217	L+M-1	S100A8
CYBA	1.39039e-218	0.437393	0.946	0.79	2.03067e-214	L+M-1	CYBA
IFNGR1	5.83254e-218	0.371216	0.705	0.321	8.51843e-214	L+M-1	IFNGR1
RGS21	3.86681e-217	0.626283	0.8	0.453	5.64748e-213	L+M-1	RGS2
ABL2	2.53202e-216	0.363654	0.397	0.125	3.69802e-212	L+M-1	ABL2
EGR1	2.23646e-210	0.420102	0.578	0.238	3.26635e-206	L+M-1	EGR1
PLEK1	4.78951e-206	0.401056	0.614	0.261	6.99508e-202	L+M-1	PLEK
ELL2	2.64075e-205	0.361131	0.665	0.297	3.85681e-201	L+M-1	ELL2
LYZ	7.87228e-202	0.797325	0.444	0.155	1.14975e-197	L+M-1	LYZ
GADD45B	3.58178e-201	0.539319	0.839	0.52	5.2312e-197	L+M-1	GADD45B
SELENOP	3.46012e-199	0.55459	0.281	0.071	5.05351e-195	L+M-1	SELENOP
S100A9	3.24674e-198	0.672683	0.451	0.163	4.74186e-194	L+M-1	S100A9
FOS	4.54252e-197	0.539427	0.944	0.76	6.63435e-193	L+M-1	FOS
TSPO	3.73982e-190	0.398014	0.843	0.532	5.462e-186	L+M-1	TSPO
CHCHD10	5.77871e-190	0.353635	0.718	0.368	8.43981e-186	L+M-1	CHCHD10
TYMP	6.79965e-190	0.427744	0.794	0.442	9.93089e-186	L+M-1	TYMP
GABARAP	1.64546e-186	0.495217	0.608	0.275	2.40319e-182	L+M-1	GABARAP
NAMPT	1.7936e-172	0.34314	0.73	0.392	2.61955e-168	L+M-1	NAMPT
OTUD1	2.73509e-170	0.322955	0.37	0.13	3.9946e-166	L+M-1	OTUD1
CEBPB	8.50027e-170	0.42681	0.754	0.408	1.24146e-165	L+M-1	CEBPB
SOD2	3.78688e-169	0.342995	0.631	0.303	5.53074e-165	L+M-1	SOD2
IFI27	1.50789e-167	0.871691	0.433	0.174	2.20228e-163	L+M-1	IFI27
LAPTM5	2.32917e-167	0.340464	0.941	0.752	3.40176e-163	L+M-1	LAPTM5
ZFP36L1	1.52535e-163	0.408382	0.851	0.544	2.22777e-159	L+M-1	ZFP36L1
SRGN	4.48415e-160	0.417558	0.967	0.87	6.54911e-156	L+M-1	SRGN
CTSD	5.74729e-159	0.389907	0.84	0.535	8.39392e-155	L+M-1	CTSD
RGS1	5.14145e-158	0.511202	0.946	0.772	7.50908e-154	L+M-1	RGS1
CD81	3.147e-155	0.33084	0.766	0.413	4.5962e-151	L+M-1	CD81
G0S2	6.84968e-151	0.870838	0.361	0.133	1.0004e-146	L+M-1	G0S2
BIN1	1.09741e-149	0.38064	0.736	0.415	1.60276e-145	L+M-1	BIN1
RNASE1	2.03844e-149	0.775625	0.34	0.125	2.97714e-145	L+M-1	RNASE1
HERPUD11	2.08794e-149	0.417908	0.89	0.627	3.04943e-145	L+M-1	HERPUD1
ZFAND5	4.98259e-146	0.454978	0.768	0.463	7.27707e-142	L+M-1	ZFAND5
DUSP1	5.10229e-143	0.41619	0.934	0.769	7.4519e-139	L+M-1	DUSP1
CCL41	7.36592e-142	0.579131	0.903	0.694	1.07579e-137	L+M-1	CCL4
VAMP8	1.02067e-139	0.325491	0.833	0.537	1.49069e-135	L+M-1	VAMP8
PLIN2	2.67762e-136	0.362534	0.728	0.405	3.91067e-132	L+M-1	PLIN2
ZFP36	1.20473e-130	0.363146	0.932	0.754	1.75951e-126	L+M-1	ZFP36
GPR1831	8.21264e-127	0.406485	0.716	0.418	1.19946e-122	L+M-1	GPR183
NFKBIA	2.93584e-113	0.406785	0.905	0.718	4.28779e-109	L+M-1	NFKBIA
IFI61	1.12922e-111	0.431506	0.599	0.34	1.64923e-107	L+M-1	IFI6
CCL20	2.06613e-92	0.545095	0.251	0.096	3.01759e-88	L+M-1	CCL20
FTL1	4.23317e-120	0.555937	0.987	0.972	6.18255e-116	L+M-2	FTL
APOE1	5.62289e-68	0.392519	0.838	0.697	8.21223e-64	L+M-2	APOE
FTH11	4.66243e-63	0.351337	0.974	0.957	6.80948e-59	L+M-2	FTH1
APOC11	4.38823e-61	0.447653	0.723	0.527	6.40901e-57	L+M-2	APOC1
SPP11	3.41448e-56	0.44775	0.832	0.71	4.98685e-52	L+M-2	SPP1
SAT11	6.60892e-54	0.354681	0.894	0.84	9.65233e-50	L+M-2	SAT1
MS4A71	9.18467e-46	0.434439	0.477	0.297	1.34142e-41	L+M-2	MS4A7
NUPR11	1.19619e-45	0.448729	0.299	0.146	1.74703e-41	L+M-2	NUPR1
SLC11A11	3.77745e-44	0.417088	0.397	0.23	5.51696e-40	L+M-2	SLC11A1
PLXDC21	2.01844e-43	0.441425	0.37	0.212	2.94793e-39	L+M-2	PLXDC2
SLC1A31	4.31611e-42	0.445911	0.378	0.216	6.30368e-38	L+M-2	SLC1A3
ITGAX1	5.55628e-42	0.333065	0.299	0.153	8.11495e-38	L+M-2	ITGAX
CST32	2.12084e-41	0.327298	0.656	0.485	3.09748e-37	L+M-2	CST3
CXCL161	6.83013e-41	0.383967	0.427	0.252	9.97541e-37	L+M-2	CXCL16
SLCO2B11	9.42347e-41	0.433976	0.352	0.196	1.3763e-36	L+M-2	SLCO2B1
GPNMB1	1.07159e-40	0.436794	0.299	0.158	1.56506e-36	L+M-2	GPNMB
RNASE11	5.27122e-39	0.52756	0.283	0.147	7.69861e-35	L+M-2	RNASE1
HMOX11	8.63981e-38	0.43752	0.419	0.261	1.26184e-33	L+M-2	HMOX1
CD681	1.41518e-37	0.362202	0.495	0.33	2.06687e-33	L+M-2	CD68
CD141	8.73608e-37	0.323508	0.479	0.311	1.2759e-32	L+M-2	CD14
A2M1	1.85454e-35	0.433081	0.425	0.274	2.70856e-31	L+M-2	A2M
PDK41	3.07956e-35	0.332266	0.35	0.203	4.4977e-31	L+M-2	PDK4
CSF1R1	5.95049e-35	0.326917	0.403	0.242	8.69069e-31	L+M-2	CSF1R
AIF11	9.11939e-34	0.363775	0.598	0.455	1.33189e-29	L+M-2	AIF1
MS4A6A1	2.06021e-33	0.347418	0.456	0.298	3.00893e-29	L+M-2	MS4A6A
RHOB1	8.07034e-33	0.350726	0.535	0.377	1.17867e-28	L+M-2	RHOB
PSAP1	9.93481e-33	0.400297	0.689	0.622	1.45098e-28	L+M-2	PSAP
CYBB2	1.91018e-31	0.341928	0.36	0.225	2.78982e-27	L+M-2	CYBB
MARCKS1	1.19536e-30	0.337064	0.439	0.299	1.74582e-26	L+M-2	MARCKS
SGK11	1.52983e-30	0.390892	0.524	0.379	2.23431e-26	L+M-2	SGK1
IL1B1	1.25049e-29	0.355179	0.454	0.303	1.82633e-25	L+M-2	IL1B
C5AR11	1.38655e-29	0.353079	0.329	0.201	2.02506e-25	L+M-2	C5AR1
C31	3.77744e-29	0.398665	0.484	0.338	5.51695e-25	L+M-2	C3
CXCL81	7.67341e-29	0.406908	0.335	0.202	1.1207e-24	L+M-2	CXCL8
CTSL1	7.84874e-29	0.339341	0.38	0.25	1.14631e-24	L+M-2	CTSL
LYZ1	1.00568e-28	0.475431	0.317	0.189	1.4688e-24	L+M-2	LYZ
CTSB1	9.18955e-28	0.371899	0.622	0.538	1.34213e-23	L+M-2	CTSB
ASAH11	2.76683e-27	0.367178	0.471	0.354	4.04095e-23	L+M-2	ASAH1
IER31	3.97291e-27	0.341199	0.475	0.332	5.80243e-23	L+M-2	IER3
CEBPD1	6.38008e-26	0.488944	0.495	0.383	9.31811e-22	L+M-2	CEBPD
FGL21	2.03722e-25	0.348395	0.328	0.21	2.97536e-21	L+M-2	FGL2
S100A91	8.87379e-23	0.434247	0.316	0.198	1.29602e-18	L+M-2	S100A9
S100A81	1.57832e-22	0.398173	0.263	0.156	2.30514e-18	L+M-2	S100A8
CTSD1	3.58911e-17	0.332321	0.631	0.578	5.24189e-13	L+M-2	CTSD
SPP12	6.79176e-137	1.17806	0.868	0.711	9.91937e-133	L+M-3	SPP1
FTL2	2.26583e-70	0.400545	0.97	0.974	3.30925e-66	L+M-3	FTL
APOE2	4.53648e-55	0.540224	0.787	0.704	6.62552e-51	L+M-3	APOE
SAT12	1.68678e-54	0.703139	0.835	0.845	2.46354e-50	L+M-3	SAT1
FTH12	3.12087e-45	0.398014	0.945	0.96	4.55803e-41	L+M-3	FTH1
C1QA1	4.04193e-30	0.642672	0.64	0.579	5.90323e-26	L+M-3	C1QA
APOC12	6.39621e-27	0.564573	0.619	0.54	9.34167e-23	L+M-3	APOC1
C1QB1	1.85215e-22	0.539352	0.634	0.588	2.70507e-18	L+M-3	C1QB
SEC61G	1.64312e-21	0.330775	0.307	0.531	2.39977e-17	L+M-3	SEC61G
HLA-DRA2	4.87041e-21	0.409362	0.753	0.769	7.11323e-17	L+M-3	HLA-DRA
CCL31	9.81489e-20	0.556115	0.564	0.514	1.43346e-15	L+M-3	CCL3
G0S21	1.04336e-17	1.19113	0.251	0.163	1.52383e-13	L+M-3	G0S2
MAP2K3	3.79354e-15	0.354096	0.157	0.292	5.54047e-11	L+M-3	MAP2K3
IL1B2	1.1419e-14	0.723479	0.385	0.312	1.66775e-10	L+M-3	IL1B
NFKB1	6.93587e-14	0.369001	0.184	0.32	1.01298e-09	L+M-3	NFKB1
ETF1	1.53125e-13	0.375788	0.184	0.319	2.23639e-09	L+M-3	ETF1
CTSB2	1.98777e-13	0.70003	0.55	0.545	2.90314e-09	L+M-3	CTSB
CMTM61	2.65792e-13	0.332647	0.237	0.385	3.8819e-09	L+M-3	CMTM6
GPCPD1	1.39168e-12	0.336288	0.163	0.29	2.03255e-08	L+M-3	GPCPD1
USP36	3.5742e-11	0.330304	0.221	0.354	5.22012e-07	L+M-3	USP36
VMP1	5.38508e-11	0.334511	0.292	0.442	7.86491e-07	L+M-3	VMP1
FOSL2	2.03923e-10	0.336462	0.238	0.367	2.97829e-06	L+M-3	FOSL2
NR4A12	3.748e-10	0.926522	0.432	0.407	5.47395e-06	L+M-3	NR4A1
C1QC1	7.1631e-10	0.449853	0.521	0.487	1.04617e-05	L+M-3	C1QC
TUBA1C1	1.11721e-09	0.345728	0.177	0.283	1.63169e-05	L+M-3	TUBA1C
CNDP2	3.2285e-09	0.357445	0.198	0.311	4.71522e-05	L+M-3	CNDP2
SERPINB9	4.21383e-09	0.433307	0.258	0.394	6.15429e-05	L+M-3	SERPINB9
NEAT11	4.2772e-09	0.423962	0.769	0.827	6.24685e-05	L+M-3	NEAT1
FCGBP1	4.9093e-09	0.781447	0.29	0.232	7.17003e-05	L+M-3	FCGBP
CD1631	8.66158e-09	1.11023	0.305	0.254	0.000126502	L+M-3	CD163
TYROBP2	1.09118e-08	0.420705	0.566	0.56	0.000159367	L+M-3	TYROBP
SGK12	1.14716e-08	0.810732	0.416	0.39	0.000167542	L+M-3	SGK1
MGAT1	2.66883e-08	0.482521	0.256	0.382	0.000389782	L+M-3	MGAT1
ANXA51	3.17809e-08	0.408505	0.338	0.492	0.000464161	L+M-3	ANXA5
PFKFB3	3.49153e-08	0.519415	0.238	0.364	0.000509938	L+M-3	PFKFB3
OLR11	3.8743e-08	0.927233	0.315	0.265	0.000565842	L+M-3	OLR1
TFRC	4.44739e-08	0.499459	0.182	0.288	0.000649541	L+M-3	TFRC
CST33	5.33097e-08	0.439075	0.511	0.5	0.000778588	L+M-3	CST3
PSAP2	7.36586e-08	0.622958	0.572	0.632	0.00107578	L+M-3	PSAP
QKI	1.27407e-07	0.372363	0.19	0.286	0.00186078	L+M-3	QKI
LIMS1	1.31257e-07	0.444049	0.281	0.419	0.00191701	L+M-3	LIMS1
CXCL82	1.56436e-07	0.901444	0.257	0.21	0.00228474	L+M-3	CXCL8
PLAUR1	1.58421e-07	1.04629	0.323	0.288	0.00231374	L+M-3	PLAUR
GNA13	1.6859e-07	0.33882	0.217	0.321	0.00246226	L+M-3	GNA13
PLD31	2.08075e-07	0.386251	0.176	0.27	0.00303893	L+M-3	PLD3
CD832	2.21481e-07	0.909456	0.361	0.331	0.00323473	L+M-3	CD83
RHBDF21	1.05074e-06	0.453551	0.172	0.258	0.0153461	L+M-3	RHBDF2
YWHAH1	1.87774e-06	0.415881	0.27	0.397	0.0274245	L+M-3	YWHAH
CDKN1A1	2.15012e-06	0.386097	0.222	0.324	0.0314025	L+M-3	CDKN1A
MFSD11	3.43108e-06	0.32527	0.178	0.258	0.0501109	L+M-3	MFSD1
LAIR11	7.68584e-06	0.380346	0.187	0.271	0.112252	L+M-3	LAIR1
SLC11A12	8.04361e-06	0.813432	0.282	0.243	0.117477	L+M-3	SLC11A1
AZIN1	1.65414e-05	0.416159	0.194	0.276	0.241587	L+M-3	AZIN1
PLIN21	2.66538e-05	0.437683	0.331	0.465	0.389278	L+M-3	PLIN2
CD811	6.69469e-05	0.480631	0.354	0.476	0.97776	L+M-3	CD81
FCER1G1	7.67901e-05	0.540989	0.461	0.466	1	L+M-3	FCER1G
PLEK2	8.3238e-05	0.408153	0.234	0.322	1	L+M-3	PLEK
C32	0.0001219	0.640017	0.37	0.35	1	L+M-3	C3
AP1B1	0.000123471	0.478502	0.193	0.27	1	L+M-3	AP1B1
GPR1832	0.000197173	0.41691	0.351	0.473	1	L+M-3	GPR183
IER32	0.000281594	0.74838	0.354	0.345	1	L+M-3	IER3
S100A111	0.000326548	0.442221	0.606	0.727	1	L+M-3	S100A11
CD142	0.000354979	0.54985	0.347	0.325	1	L+M-3	CD14
APLP21	0.000460288	0.458262	0.232	0.304	1	L+M-3	APLP2
CTSD2	0.000637632	0.359251	0.441	0.593	1	L+M-3	CTSD
SDCBP	0.000790742	0.517488	0.372	0.506	1	L+M-3	SDCBP
TIMP1	0.000979233	0.454431	0.242	0.32	1	L+M-3	TIMP1
RGS22	0.00113902	0.333081	0.387	0.516	1	L+M-3	RGS2
ASAH12	0.00174719	0.451595	0.286	0.37	1	L+M-3	ASAH1
GLUL1	0.00178258	0.758535	0.467	0.512	1	L+M-3	GLUL
NPC22	0.00219074	0.470805	0.482	0.526	1	L+M-3	NPC2
HLA-DRB52	0.00358458	0.517037	0.33	0.321	1	L+M-3	HLA-DRB5
IER5	0.00361152	0.505991	0.295	0.389	1	L+M-3	IER5
CEBPD2	0.00679748	0.364895	0.313	0.399	1	L+M-3	CEBPD
PABPC4	0.00774203	0.60662	0.276	0.357	1	L+M-3	PABPC4
MALAT1	8.12442e-97	0.525898	0.998	0.997	1.18657e-92	Dying	MALAT1
NEAT12	1.39737e-33	0.698023	0.795	0.826	2.04086e-29	Dying	NEAT1
SYNE21	5.28862e-26	0.873389	0.547	0.531	7.72404e-22	Dying	SYNE2
RNF2131	1.49137e-25	0.717158	0.64	0.694	2.17814e-21	Dying	RNF213
DDX17	4.21449e-19	0.6984	0.548	0.583	6.15527e-15	Dying	DDX17
MIAT1	4.34385e-18	1.00115	0.28	0.206	6.34419e-14	Dying	MIAT
NKTR	1.75173e-17	0.785514	0.508	0.53	2.5584e-13	Dying	NKTR
N4BP2L2	1.83731e-13	0.639652	0.537	0.606	2.68339e-09	Dying	N4BP2L2
ATM	3.37134e-11	0.718149	0.41	0.408	4.92384e-07	Dying	ATM
SMCHD1	3.96824e-11	0.622912	0.548	0.606	5.79561e-07	Dying	SMCHD1
IKZF11	1.55282e-10	0.61349	0.537	0.611	2.26789e-06	Dying	IKZF1
FUS	3.72843e-10	0.499855	0.614	0.723	5.44537e-06	Dying	FUS
PTPRC2	3.53371e-09	0.336373	0.683	0.815	5.16098e-05	Dying	PTPRC
STK10	3.62756e-09	0.3275	0.242	0.382	5.29805e-05	Dying	STK10
UPF2	3.14048e-08	0.361002	0.216	0.339	0.000458668	Dying	UPF2
MYO1F	3.24897e-08	0.324384	0.268	0.413	0.000474512	Dying	MYO1F
SAFB2	8.19103e-08	0.342761	0.236	0.364	0.0011963	Dying	SAFB2
TRABD	8.80092e-08	0.328801	0.269	0.416	0.00128537	Dying	TRABD
MACF11	9.02826e-08	0.581909	0.467	0.506	0.00131858	Dying	MACF1
PNISR1	1.09815e-07	0.540217	0.55	0.661	0.00160384	Dying	PNISR
ILF3	1.48328e-07	0.34718	0.283	0.429	0.00216633	Dying	ILF3
SLC20A1	6.89461e-07	0.377562	0.188	0.288	0.0100696	Dying	SLC20A1
RABGAP1L	6.95655e-07	0.33822	0.254	0.386	0.01016	Dying	RABGAP1L
MARK3	7.80497e-07	0.3408	0.197	0.303	0.0113992	Dying	MARK3
INTS6	1.62028e-06	0.327147	0.259	0.387	0.0236641	Dying	INTS6
ATG2A	2.12812e-06	0.356	0.182	0.277	0.0310812	Dying	ATG2A
AKAP17A	3.79525e-06	0.355391	0.176	0.267	0.0554296	Dying	AKAP17A
MED15	5.38411e-06	0.362735	0.183	0.275	0.078635	Dying	MED15
ASXL1	5.57454e-06	0.32211	0.188	0.281	0.0814162	Dying	ASXL1
BIRC31	5.83615e-06	0.329269	0.274	0.4	0.085237	Dying	BIRC3
DENND2D	7.43527e-06	0.36978	0.201	0.296	0.108592	Dying	DENND2D
MYO9B	1.34306e-05	0.331671	0.235	0.345	0.196154	Dying	MYO9B
USP8	1.4351e-05	0.360281	0.237	0.351	0.209596	Dying	USP8
PAG1	1.64933e-05	0.402165	0.248	0.365	0.240884	Dying	PAG1
VMP11	1.72855e-05	0.32488	0.308	0.442	0.252455	Dying	VMP1
PPP2R5C1	2.55319e-05	0.497411	0.529	0.615	0.372893	Dying	PPP2R5C
FYN1	3.48174e-05	0.521175	0.51	0.592	0.508508	Dying	FYN
PARP9	4.16858e-05	0.325493	0.176	0.262	0.608821	Dying	PARP9
UTRN	4.24296e-05	0.553897	0.389	0.417	0.619684	Dying	UTRN
XAF1	6.08218e-05	0.325043	0.227	0.328	0.888303	Dying	XAF1
ANKRD121	6.47181e-05	0.464731	0.53	0.637	0.945208	Dying	ANKRD12
SNRNP200	6.69593e-05	0.393507	0.285	0.411	0.97794	Dying	SNRNP200
LPIN1	7.63655e-05	0.379098	0.253	0.358	1	Dying	LPIN1
MBNL1	8.99994e-05	0.448968	0.51	0.611	1	Dying	MBNL1
LPP	0.000108713	0.426046	0.18	0.26	1	Dying	LPP
CHORDC1	0.000120842	0.342522	0.265	0.377	1	Dying	CHORDC1
ZEB21	0.000132207	0.32404	0.308	0.44	1	Dying	ZEB2
SRSF10	0.00013826	0.37593	0.314	0.452	1	Dying	SRSF10
DNAJB14	0.000274216	0.332401	0.23	0.324	1	Dying	DNAJB14
JAML	0.000289961	0.326465	0.184	0.256	1	Dying	JAML
KIAA15512	0.000300387	0.50719	0.483	0.554	1	Dying	KIAA1551
SYNE1	0.000312441	0.632474	0.356	0.372	1	Dying	SYNE1
SNRNP70	0.000401603	0.444328	0.309	0.44	1	Dying	SNRNP70
SECISBP2	0.000426867	0.395218	0.203	0.289	1	Dying	SECISBP2
MECP2	0.000450456	0.347246	0.254	0.355	1	Dying	MECP2
ARAP2	0.000476433	0.578753	0.375	0.403	1	Dying	ARAP2
PARP14	0.000494252	0.665436	0.376	0.415	1	Dying	PARP14
TSPYL2	0.000501925	0.366841	0.326	0.451	1	Dying	TSPYL2
EPS15	0.000512734	0.371588	0.252	0.351	1	Dying	EPS15
LYST1	0.000526291	0.363371	0.279	0.391	1	Dying	LYST
APOL6	0.000557097	0.329537	0.281	0.392	1	Dying	APOL6
MALT1	0.000561983	0.379853	0.228	0.32	1	Dying	MALT1
LUC7L3	0.000599761	0.570701	0.445	0.52	1	Dying	LUC7L3
FOXP1	0.000605713	0.334287	0.312	0.439	1	Dying	FOXP1
SEMA4D	0.000622782	0.366387	0.287	0.402	1	Dying	SEMA4D
FRYL	0.000636975	0.344128	0.202	0.282	1	Dying	FRYL
UBE2G2	0.000642742	0.366357	0.204	0.285	1	Dying	UBE2G2
ZRANB2	0.000701219	0.344392	0.275	0.383	1	Dying	ZRANB2
SREK1	0.000757967	0.407806	0.224	0.31	1	Dying	SREK1
TRIM56	0.000790212	0.639181	0.28	0.28	1	Dying	TRIM56
MUC20-OT1	0.000845459	0.345114	0.2	0.279	1	Dying	MUC20-OT1
CCDC186	0.000967777	0.339378	0.213	0.292	1	Dying	CCDC186
FAM118A	0.00101721	0.430518	0.188	0.262	1	Dying	FAM118A
KMT2C	0.00110151	0.327298	0.265	0.368	1	Dying	KMT2C
SAMHD1	0.00112329	0.351989	0.322	0.45	1	Dying	SAMHD1
TRIM44	0.00118186	0.326353	0.186	0.257	1	Dying	TRIM44
SMG1	0.00124369	0.569165	0.368	0.398	1	Dying	SMG1
TUT7	0.00127413	0.473929	0.209	0.289	1	Dying	TUT7
TAOK1	0.00131554	0.358425	0.194	0.269	1	Dying	TAOK1
ZC3HAV1	0.00154086	0.331463	0.395	0.553	1	Dying	ZC3HAV1
SETD5	0.00158299	0.421581	0.202	0.278	1	Dying	SETD5
ARID1B1	0.00167938	0.616547	0.346	0.376	1	Dying	ARID1B
SLC4A7	0.00187845	0.336142	0.255	0.352	1	Dying	SLC4A7
RASGRP1	0.00228528	0.325721	0.239	0.325	1	Dying	RASGRP1
ANKLE2	0.00239145	0.381467	0.194	0.265	1	Dying	ANKLE2
RBM33	0.0025275	0.419911	0.215	0.293	1	Dying	RBM33
NLRC5	0.0026021	0.679295	0.294	0.304	1	Dying	NLRC5
EML4	0.00269746	0.509897	0.47	0.56	1	Dying	EML4
RBM26	0.00284151	0.348334	0.21	0.288	1	Dying	RBM26
TRIM33	0.00307865	0.397279	0.197	0.27	1	Dying	TRIM33
PRRC2C	0.00361149	0.357928	0.553	0.687	1	Dying	PRRC2C
PCSK71	0.00371692	0.61643	0.4	0.457	1	Dying	PCSK7
BTN3A1	0.00373473	0.354512	0.208	0.278	1	Dying	BTN3A1
PHIP	0.00384573	0.396633	0.304	0.417	1	Dying	PHIP
ARGLU1	0.00394618	0.467186	0.516	0.64	1	Dying	ARGLU1
HELZ	0.00400306	0.384585	0.238	0.324	1	Dying	HELZ
JAK3	0.00465181	0.345913	0.191	0.258	1	Dying	JAK3
ODF2L	0.00492964	0.389978	0.272	0.371	1	Dying	ODF2L
TC2N1	0.00505426	0.335942	0.256	0.342	1	Dying	TC2N
RBL2	0.00505629	0.354619	0.261	0.351	1	Dying	RBL2
NFATC2IP	0.00512455	0.441885	0.208	0.281	1	Dying	NFATC2IP
TRAPPC10	0.00563901	0.350453	0.198	0.265	1	Dying	TRAPPC10
NABP1	0.00594416	0.391481	0.249	0.334	1	Dying	NABP1
AGO2	0.00602459	0.322758	0.201	0.269	1	Dying	AGO2
CYLD	0.00663962	0.339915	0.31	0.423	1	Dying	CYLD
GOLGB1	0.0068307	0.537296	0.37	0.412	1	Dying	GOLGB1
RSRP1	0.00708193	0.460537	0.506	0.621	1	Dying	RSRP1
CD84	0.00721852	0.410609	0.266	0.366	1	Dying	CD84
NSD1	0.00847593	0.36626	0.227	0.306	1	Dying	NSD1
MSI2	0.00867599	0.339251	0.211	0.281	1	Dying	MSI2
PLCG22	0.00875702	0.567937	0.33	0.347	1	Dying	PLCG2
RIPOR22	0.00908407	0.376319	0.264	0.351	1	Dying	RIPOR2
RASA2	0.00970838	0.368208	0.268	0.356	1	Dying	RASA2
ANKRD13D	0.00987228	0.422501	0.201	0.267	1	Dying	ANKRD13D

## Sheet: Fractions
SampleID	Condition	IDH_status	MGMT	L1-GZMK.CD8A.T	L2-IL7R-CD69-CD40L.T	L3-IL7R-TOX-TCF7.T	L4-Treg	L5-XCL1/2-GZMA/B-KLRB1-PRF1.T	L6-Proliferating	L7-pDC-Bcells	L+M-1	L+M-2	L+M-3	Dying	Total	Lymphoid
LB3018T	GBM.rec	WT	Un	25	40	0	5	9	9	2	9	3	10	1	113	91
LB3579T	GBM.rec	WT	Un	39	37	11	29	29	24	4	46	36	1	88	344	261
LB3612T	GBM.new	WT	Un	14	40	0	1	5	16	3	19	6	26	0	130	79
LB3667T	GBM.PD1	WT	Meth	207	370	8	47	60	73	18	188	43	56	17	1087	800
LB3771T	GBM.new	WT	Meth	3	16	0	1	3	24	2	5	2	18	0	74	49
LB3836T	GBM.new	WT	Un	11	41	0	10	8	11	0	29	10	28	2	150	83
LB3851T	GBM.new	WT	Un	38	131	6	18	49	30	4	27	13	67	1	384	277
LB3853T	GBM.PD1	WT	Meth	30	59	1	19	32	14	7	118	35	25	2	342	164
LB3854T	GBM.new	WT	Un	3	28	2	1	15	8	1	34	10	30	0	132	58
LB3864T	GBM.PD1	WT	Un	61	114	3	27	43	27	14	122	49	48	4	512	293
LB3865T	GBM.new	WT	Un	40	28	3	20	15	21	7	87	36	12	21	290	155
LB3869T	GBM.PD1	WT	Un	21	58	2	20	21	27	1	34	17	26	3	230	153
LB3871T	GBM.rec	WT	Un	50	87	5	30	65	41	7	130	37	88	3	543	288
LB3872T	GBM.PD1	WT	Meth	102	124	28	111	52	108	29	304	145	31	63	1097	617
LB3914T	GBM.PD1	WT	Un	192	125	45	43	51	43	17	157	118	60	50	901	566
LB3915T	GBM.new	WT	Meth	60	37	15	22	21	23	0	98	39	28	35	378	213
LB3931T	GBM.new	WT	Meth	9	10	0	4	14	11	1	39	9	5	11	113	60
LB3933T	GBM.new	WT	Un	17	21	4	9	13	11	4	56	42	14	9	200	88
LB3941T	GBM.new	WT	Un	12	25	3	3	10	6	0	64	19	4	7	153	66
LB3944T	GBM.PD1	WT	Un	187	118	17	60	48	32	11	101	74	19	82	749	555
LB3958T	GBM.rec	Mut	Meth	46	47	19	5	32	8	15	44	16	21	8	261	180
LB3963T	GBM.new	WT	Meth	54	71	4	15	19	22	3	16	10	115	18	347	206
LB3964T	GBM.rec	Mut	Un	40	68	3	15	33	27	3	14	14	26	7	250	196
LB4003T	GBM.PD1	WT	Un	61	52	43	29	29	28	9	36	51	12	25	375	276
LB4006T	GBM.PD1	WT	Un	82	45	39	20	42	20	3	16	36	21	35	359	286
LB4015T	GBM.rec	WT	Meth	2	20	4	0	0	13	0	6	4	12	0	61	39
LB4024T	GBM.PD1	WT	Un	10	14	2	1	4	6	0	5	3	6	1	52	38
LB4025T	GBM.PD1	Mut	Meth	393	240	216	96	136	107	48	34	52	2	367	1691	1603
LB4034T	GBM.new	WT	Un	60	70	13	18	22	11	6	62	23	5	24	314	224
LB4038T	GBM.new	WT	Un	15	63	2	0	13	24	4	20	10	82	5	238	126
LB4059T	GBM.rec	WT	Un	52	19	18	17	26	15	6	56	65	8	18	300	171
LB4075T	GBM.PD1	WT	Meth	102	74	89	27	30	49	3	28	132	0	64	598	438
LB4101T	GBM.rec	WT	Un	21	14	4	2	16	9	1	36	5	8	10	126	77
LB4102T	GBM.rec	Mut	Un	148	69	15	24	55	32	6	108	62	12	66	597	415
LB4112T	GBM.PD1	WT	Un	57	38	6	21	27	32	12	42	17	3	31	286	224
LB4117T	GBM.PD1	WT	Un	23	20	1	5	9	6	3	10	12	1	8	98	75
LB4130T	GBM.rec	WT	Meth	4	11	0	5	2	9	1	2	6	7	7	54	39
LB4143T	GBM.rec	WT	Meth	27	29	0	13	20	25	4	7	7	19	19	170	137
LB4177T	GBM.rec	Mut	Un	20	23	9	5	17	12	2	28	14	2	18	150	106
LB4180T	GBM.new	WT	Un	12	9	9	3	4	5	1	13	11	0	6	73	49

## Sheet: Fraction.p.val
	Type	new.vs.PD1.wilcox	rec.vs.PD1.wilcox
1	L1-GZMK.CD8A.T	0.0310252	0.347446
2	L2-IL7R-CD69-CD40L.T	0.149881	0.899475
3	L3-IL7R-TOX-TCF7.T	0.279519	0.553917
4	L4-Treg	0.168012	0.251953
5	L5-XCL1/2-GZMA/B-KLRB1-PRF1.T	0.768812	0.117926
6	L6-Proliferating	0.0690475	0.251953
7	L7-pDC-Bcells	0.357461	0.381827
8	Dying	0.565521	0.704507

## Sheet: DEG
Gene	p_val	avg_logFC	pct.1	pct.2	p_val_adj	cluster	gene	diff	celltype
SPP1	1.59796e-36	0.886912	0.793	0.568	2.33382e-32	GBM.new	SPP1	0.225	L1-GZMK.CD8A.T
HLA-DRB5	4.46799e-09	0.516464	0.394	0.251	6.5255e-05	GBM.new	HLA-DRB5	0.143	L1-GZMK.CD8A.T
TMSB4X	1.07945e-07	0.34896	0.997	0.99	0.00157654	GBM.new	TMSB4X	0.007	L1-GZMK.CD8A.T
HSP90AA1	2.78499e-07	0.593177	0.888	0.901	0.00406747	GBM.new	HSP90AA1	-0.013	L1-GZMK.CD8A.T
IL1B	2.73426e-06	0.619	0.256	0.161	0.0399339	GBM.new	IL1B	0.095	L1-GZMK.CD8A.T
APOC1	4.41711e-05	0.361009	0.471	0.367	0.64512	GBM.new	APOC1	0.104	L1-GZMK.CD8A.T
GPR183	8.92618e-05	0.437336	0.388	0.312	1	GBM.new	GPR183	0.076	L1-GZMK.CD8A.T
LGALS1	0.00177668	0.517082	0.532	0.47	1	GBM.new	LGALS1	0.062	L1-GZMK.CD8A.T
DNAJA1	0.00316744	0.403445	0.598	0.608	1	GBM.new	DNAJA1	-0.01	L1-GZMK.CD8A.T
PTPRCAP	1.87775e-57	1.38581	0.371	0.092	2.74246e-53	GBM.rec	PTPRCAP	0.279	L1-GZMK.CD8A.T
EEF1G	6.57537e-34	1.01519	0.295	0.094	9.60333e-30	GBM.rec	EEF1G	0.201	L1-GZMK.CD8A.T
IFITM1	1.72151e-26	0.782571	0.519	0.294	2.51427e-22	GBM.rec	IFITM1	0.225	L1-GZMK.CD8A.T
PPDPF	4.16322e-23	0.62358	0.751	0.667	6.08039e-19	GBM.rec	PPDPF	0.084	L1-GZMK.CD8A.T
GABARAP	2.90983e-21	0.879716	0.414	0.241	4.24981e-17	GBM.rec	GABARAP	0.173	L1-GZMK.CD8A.T
HLA-DRB51	4.37762e-16	0.497597	0.422	0.234	6.39351e-12	GBM.rec	HLA-DRB5	0.188	L1-GZMK.CD8A.T
ARHGDIB	2.15606e-15	0.34813	0.876	0.828	3.14892e-11	GBM.rec	ARHGDIB	0.048	L1-GZMK.CD8A.T
PFN1	2.40155e-15	0.468248	0.907	0.878	3.50747e-11	GBM.rec	PFN1	0.029	L1-GZMK.CD8A.T
ALDOA	2.90499e-14	0.735457	0.333	0.199	4.24274e-10	GBM.rec	ALDOA	0.134	L1-GZMK.CD8A.T
RNASEK	2.3536e-13	0.582475	0.302	0.174	3.43743e-09	GBM.rec	RNASEK	0.128	L1-GZMK.CD8A.T
MIF	4.07555e-13	0.551829	0.521	0.386	5.95234e-09	GBM.rec	MIF	0.135	L1-GZMK.CD8A.T
ACTB	2.68666e-12	0.410884	0.981	0.971	3.92387e-08	GBM.rec	ACTB	0.01	L1-GZMK.CD8A.T
CTSW	7.10618e-12	0.553861	0.643	0.551	1.03786e-07	GBM.rec	CTSW	0.092	L1-GZMK.CD8A.T
MYL12A	1.09048e-11	0.357564	0.827	0.802	1.59264e-07	GBM.rec	MYL12A	0.025	L1-GZMK.CD8A.T
CRIP1	3.96506e-11	0.613054	0.426	0.312	5.79097e-07	GBM.rec	CRIP1	0.114	L1-GZMK.CD8A.T
CD99	1.00838e-10	0.380407	0.741	0.694	1.47274e-06	GBM.rec	CD99	0.047	L1-GZMK.CD8A.T
PPIA	1.74514e-10	0.409529	0.785	0.767	2.54878e-06	GBM.rec	PPIA	0.018	L1-GZMK.CD8A.T
SH3BGRL3	4.26127e-10	0.341034	0.876	0.87	6.22358e-06	GBM.rec	SH3BGRL3	0.006	L1-GZMK.CD8A.T
FLNA	1.73593e-08	0.398077	0.538	0.443	0.000253533	GBM.rec	FLNA	0.095	L1-GZMK.CD8A.T
CD74	4.51502e-08	0.322593	0.909	0.895	0.000659419	GBM.rec	CD74	0.014	L1-GZMK.CD8A.T
PSMB10	4.93862e-08	0.555506	0.382	0.293	0.000721286	GBM.rec	PSMB10	0.089	L1-GZMK.CD8A.T
S100A10	5.88342e-08	0.33582	0.726	0.658	0.000859274	GBM.rec	S100A10	0.068	L1-GZMK.CD8A.T
LSP1	9.29211e-08	0.338833	0.686	0.641	0.00135711	GBM.rec	LSP1	0.045	L1-GZMK.CD8A.T
EMP3	3.63678e-07	0.354147	0.624	0.554	0.00531151	GBM.rec	EMP3	0.07	L1-GZMK.CD8A.T
EMD	1.1063e-06	0.441753	0.34	0.258	0.0161576	GBM.rec	EMD	0.082	L1-GZMK.CD8A.T
ARF5	2.99133e-06	0.357327	0.329	0.251	0.0436884	GBM.rec	ARF5	0.078	L1-GZMK.CD8A.T
ADGRE5	6.42141e-06	0.335626	0.595	0.539	0.0937847	GBM.rec	ADGRE5	0.056	L1-GZMK.CD8A.T
RAC2	2.74359e-05	0.386101	0.669	0.686	0.400701	GBM.rec	RAC2	-0.017	L1-GZMK.CD8A.T
CNN2	0.000107637	0.340891	0.508	0.461	1	GBM.rec	CNN2	0.047	L1-GZMK.CD8A.T
GPI	0.000766719	0.348785	0.327	0.273	1	GBM.rec	GPI	0.054	L1-GZMK.CD8A.T
STAT1	6.0766e-26	0.532075	0.541	0.328	8.87487e-22	GBM.PD1	STAT1	0.213	L1-GZMK.CD8A.T
GBP1	5.08769e-25	0.570665	0.433	0.23	7.43058e-21	GBM.PD1	GBP1	0.203	L1-GZMK.CD8A.T
KIAA1551	1.49194e-19	0.41811	0.672	0.527	2.17898e-15	GBM.PD1	KIAA1551	0.145	L1-GZMK.CD8A.T
PARP14	1.64109e-19	0.465313	0.459	0.274	2.39681e-15	GBM.PD1	PARP14	0.185	L1-GZMK.CD8A.T
KLRD1	3.42695e-19	0.43545	0.414	0.22	5.00506e-15	GBM.PD1	KLRD1	0.194	L1-GZMK.CD8A.T
MIAT	3.56444e-19	0.402641	0.315	0.141	5.20587e-15	GBM.PD1	MIAT	0.174	L1-GZMK.CD8A.T
GPR171	1.00534e-16	0.415681	0.414	0.235	1.4683e-12	GBM.PD1	GPR171	0.179	L1-GZMK.CD8A.T
CFLAR	8.61409e-16	0.327566	0.615	0.453	1.25809e-11	GBM.PD1	CFLAR	0.162	L1-GZMK.CD8A.T
SAMD9L	7.62834e-14	0.335981	0.387	0.226	1.11412e-09	GBM.PD1	SAMD9L	0.161	L1-GZMK.CD8A.T
RBPJ	2.03794e-11	0.338385	0.436	0.282	2.97641e-07	GBM.PD1	RBPJ	0.154	L1-GZMK.CD8A.T
SYNE2	3.69783e-10	0.333965	0.626	0.534	5.40068e-06	GBM.PD1	SYNE2	0.092	L1-GZMK.CD8A.T
PPP1R14B	3.38917e-08	0.424095	0.281	0.179	0.000494988	GBM.PD1	PPP1R14B	0.102	L1-GZMK.CD8A.T
SPP1	3.01734e-76	1.16775	0.854	0.622	4.40683e-72	GBM.new	SPP1	0.232	L2-IL7R-CD69-CD40L.T
HSP90AA1	3.27958e-11	0.359008	0.91	0.937	4.78983e-07	GBM.new	HSP90AA1	-0.027	L2-IL7R-CD69-CD40L.T
CTSB	1.64661e-08	0.517234	0.524	0.437	0.000240487	GBM.new	CTSB	0.087	L2-IL7R-CD69-CD40L.T
APOE	9.38471e-08	0.618067	0.724	0.636	0.00137064	GBM.new	APOE	0.088	L2-IL7R-CD69-CD40L.T
PLCG2	5.32239e-07	0.490759	0.324	0.24	0.00777336	GBM.new	PLCG2	0.084	L2-IL7R-CD69-CD40L.T
C3	7.41827e-05	0.617271	0.288	0.22	1	GBM.new	C3	0.068	L2-IL7R-CD69-CD40L.T
FTL	0.000138734	0.35686	0.971	0.974	1	GBM.new	FTL	-0.003	L2-IL7R-CD69-CD40L.T
NABP1	0.00014723	0.424655	0.354	0.302	1	GBM.new	NABP1	0.052	L2-IL7R-CD69-CD40L.T
IL1B	0.000340358	0.615875	0.273	0.213	1	GBM.new	IL1B	0.06	L2-IL7R-CD69-CD40L.T
DNAJA1	0.000371778	0.322032	0.68	0.687	1	GBM.new	DNAJA1	-0.007	L2-IL7R-CD69-CD40L.T
CD63	0.000528185	0.397759	0.525	0.487	1	GBM.new	CD63	0.038	L2-IL7R-CD69-CD40L.T
GLUL	0.000721246	0.434982	0.453	0.403	1	GBM.new	GLUL	0.05	L2-IL7R-CD69-CD40L.T
CEBPB	0.00135547	0.553934	0.451	0.421	1	GBM.new	CEBPB	0.03	L2-IL7R-CD69-CD40L.T
APOC1	0.00158257	0.502461	0.481	0.434	1	GBM.new	APOC1	0.047	L2-IL7R-CD69-CD40L.T
IER3	0.00245684	0.384458	0.256	0.206	1	GBM.new	IER3	0.05	L2-IL7R-CD69-CD40L.T
CD81	0.00253941	0.46387	0.398	0.359	1	GBM.new	CD81	0.039	L2-IL7R-CD69-CD40L.T
SOD2	0.00955655	0.330276	0.315	0.28	1	GBM.new	SOD2	0.035	L2-IL7R-CD69-CD40L.T
IFITM1	1.47704e-19	0.66133	0.429	0.235	2.15721e-15	GBM.rec	IFITM1	0.194	L2-IL7R-CD69-CD40L.T
XIST	6.21458e-17	0.836621	0.308	0.156	9.07639e-13	GBM.rec	XIST	0.152	L2-IL7R-CD69-CD40L.T
ALDOA	7.52728e-16	0.556564	0.291	0.145	1.09936e-11	GBM.rec	ALDOA	0.146	L2-IL7R-CD69-CD40L.T
GABARAP	1.77367e-13	0.525345	0.325	0.185	2.59045e-09	GBM.rec	GABARAP	0.14	L2-IL7R-CD69-CD40L.T
BAG3	3.30057e-11	0.59054	0.308	0.186	4.82048e-07	GBM.rec	BAG3	0.122	L2-IL7R-CD69-CD40L.T
IFITM3	7.92598e-11	0.574448	0.269	0.155	1.15759e-06	GBM.rec	IFITM3	0.114	L2-IL7R-CD69-CD40L.T
NR4A1	6.80895e-10	0.605015	0.425	0.294	9.94447e-06	GBM.rec	NR4A1	0.131	L2-IL7R-CD69-CD40L.T
DNAJB1	9.14875e-09	0.743325	0.832	0.802	0.000133617	GBM.rec	DNAJB1	0.03	L2-IL7R-CD69-CD40L.T
CTSW	9.51047e-08	0.429807	0.453	0.343	0.001389	GBM.rec	CTSW	0.11	L2-IL7R-CD69-CD40L.T
ZYX	1.02754e-07	0.33276	0.347	0.231	0.00150072	GBM.rec	ZYX	0.116	L2-IL7R-CD69-CD40L.T
KLF2	5.26095e-07	0.368962	0.496	0.397	0.00768362	GBM.rec	KLF2	0.099	L2-IL7R-CD69-CD40L.T
RASA3	7.16637e-07	0.333728	0.269	0.179	0.0104665	GBM.rec	RASA3	0.09	L2-IL7R-CD69-CD40L.T
C1QC	1.6991e-06	0.463244	0.429	0.327	0.0248154	GBM.rec	C1QC	0.102	L2-IL7R-CD69-CD40L.T
HSP90AA11	2.42032e-06	0.411062	0.953	0.926	0.0353488	GBM.rec	HSP90AA1	0.027	L2-IL7R-CD69-CD40L.T
IL4R	7.13383e-06	0.324218	0.269	0.187	0.10419	GBM.rec	IL4R	0.082	L2-IL7R-CD69-CD40L.T
MIF	1.11429e-05	0.363546	0.472	0.377	0.162741	GBM.rec	MIF	0.095	L2-IL7R-CD69-CD40L.T
NKG7	0.000176526	0.439348	0.433	0.359	1	GBM.rec	NKG7	0.074	L2-IL7R-CD69-CD40L.T
IFI6	0.0038731	0.373532	0.334	0.28	1	GBM.rec	IFI6	0.054	L2-IL7R-CD69-CD40L.T
PLCG21	0.00602402	0.520896	0.308	0.248	1	GBM.rec	PLCG2	0.06	L2-IL7R-CD69-CD40L.T
LTB	0.00918576	0.345728	0.571	0.551	1	GBM.rec	LTB	0.02	L2-IL7R-CD69-CD40L.T
STAT1	9.92659e-29	0.552679	0.451	0.258	1.44978e-24	GBM.PD1	STAT1	0.193	L2-IL7R-CD69-CD40L.T
CXCR6	6.62937e-25	0.678181	0.328	0.155	9.68219e-21	GBM.PD1	CXCR6	0.173	L2-IL7R-CD69-CD40L.T
CTLA4	1.26711e-22	0.450419	0.253	0.098	1.85061e-18	GBM.PD1	CTLA4	0.155	L2-IL7R-CD69-CD40L.T
PIK3IP1	4.56282e-19	0.322857	0.686	0.53	6.66399e-15	GBM.PD1	PIK3IP1	0.156	L2-IL7R-CD69-CD40L.T
TRBC2	8.46835e-19	0.339584	0.697	0.537	1.2368e-14	GBM.PD1	TRBC2	0.16	L2-IL7R-CD69-CD40L.T
TRAC	9.58498e-18	0.324542	0.697	0.542	1.39989e-13	GBM.PD1	TRAC	0.155	L2-IL7R-CD69-CD40L.T
ICOS	8.68234e-17	0.400122	0.331	0.182	1.26806e-12	GBM.PD1	ICOS	0.149	L2-IL7R-CD69-CD40L.T
CCNH	1.09731e-15	0.327631	0.683	0.521	1.60262e-11	GBM.PD1	CCNH	0.162	L2-IL7R-CD69-CD40L.T
SELL	1.2919e-15	0.380072	0.264	0.13	1.88682e-11	GBM.PD1	SELL	0.134	L2-IL7R-CD69-CD40L.T
RIPOR2	3.77939e-14	0.349225	0.436	0.296	5.5198e-10	GBM.PD1	RIPOR2	0.14	L2-IL7R-CD69-CD40L.T
GBP1	1.48992e-12	0.342066	0.283	0.169	2.17603e-08	GBM.PD1	GBP1	0.114	L2-IL7R-CD69-CD40L.T
CCL4L2	2.2835e-09	0.614319	0.335	0.227	3.33505e-05	GBM.PD1	CCL4L2	0.108	L2-IL7R-CD69-CD40L.T
SPP1	1.93248e-09	0.580947	0.852	0.646	2.82239e-05	GBM.new	SPP1	0.206	L3-IL7R-TOX-TCF7.T
UQCRB	4.61945e-05	0.43044	0.803	0.9	0.674671	GBM.new	UQCRB	-0.097	L3-IL7R-TOX-TCF7.T
COX7C	5.1889e-05	0.373929	0.82	0.901	0.757839	GBM.new	COX7C	-0.081	L3-IL7R-TOX-TCF7.T
TMSB4X	7.18997e-05	0.509861	1	0.986	1	GBM.new	TMSB4X	0.014	L3-IL7R-TOX-TCF7.T
HLA-DRB5	7.93992e-05	0.737638	0.508	0.31	1	GBM.new	HLA-DRB5	0.198	L3-IL7R-TOX-TCF7.T
SCIN	0.000175911	0.552858	0.279	0.126	1	GBM.new	SCIN	0.153	L3-IL7R-TOX-TCF7.T
SUB1	0.000622138	0.436779	0.836	0.913	1	GBM.new	SUB1	-0.077	L3-IL7R-TOX-TCF7.T
HCST	0.00130286	0.338604	0.803	0.91	1	GBM.new	HCST	-0.107	L3-IL7R-TOX-TCF7.T
RGCC	0.00130356	0.86401	0.705	0.745	1	GBM.new	RGCC	-0.04	L3-IL7R-TOX-TCF7.T
HLA-B	0.00150203	0.340683	0.984	0.978	1	GBM.new	HLA-B	0.006	L3-IL7R-TOX-TCF7.T
TIMP1	0.00178241	0.625212	0.213	0.497	1	GBM.new	TIMP1	-0.284	L3-IL7R-TOX-TCF7.T
COX6C	0.00181671	0.32783	0.77	0.857	1	GBM.new	COX6C	-0.087	L3-IL7R-TOX-TCF7.T
CD52	0.00184121	0.566229	0.836	0.91	1	GBM.new	CD52	-0.074	L3-IL7R-TOX-TCF7.T
FTH1	0.00240721	0.364151	1	0.969	1	GBM.new	FTH1	0.031	L3-IL7R-TOX-TCF7.T
XIST	0.00256965	0.546444	0.311	0.173	1	GBM.new	XIST	0.138	L3-IL7R-TOX-TCF7.T
LENG1	0.00263348	0.32841	0.164	0.405	1	GBM.new	LENG1	-0.241	L3-IL7R-TOX-TCF7.T
S100A6	0.00342359	0.332401	0.852	0.912	1	GBM.new	S100A6	-0.06	L3-IL7R-TOX-TCF7.T
PTGER2	0.00483918	0.337092	0.164	0.403	1	GBM.new	PTGER2	-0.239	L3-IL7R-TOX-TCF7.T
KIF3A	0.00749105	0.342955	0.164	0.388	1	GBM.new	KIF3A	-0.224	L3-IL7R-TOX-TCF7.T
CALM1	2.62321e-08	0.373662	0.92	0.923	0.000383121	GBM.rec	CALM1	-0.003	L3-IL7R-TOX-TCF7.T
CST7	1.44987e-06	0.414133	0.852	0.852	0.0211753	GBM.rec	CST7	0	L3-IL7R-TOX-TCF7.T
MIF	9.30644e-06	0.589813	0.693	0.672	0.13592	GBM.rec	MIF	0.021	L3-IL7R-TOX-TCF7.T
EXOC8	2.9507e-05	0.451685	0.068	0.287	0.43095	GBM.rec	EXOC8	-0.219	L3-IL7R-TOX-TCF7.T
ZFP36L2	3.19096e-05	0.391233	0.955	0.961	0.46604	GBM.rec	ZFP36L2	-0.006	L3-IL7R-TOX-TCF7.T
MYL12A	4.86619e-05	0.419662	0.909	0.904	0.710707	GBM.rec	MYL12A	0.005	L3-IL7R-TOX-TCF7.T
PPDPF	6.86652e-05	0.574106	0.807	0.85	1	GBM.rec	PPDPF	-0.043	L3-IL7R-TOX-TCF7.T
DUSP2	9.95833e-05	0.500767	0.886	0.881	1	GBM.rec	DUSP2	0.005	L3-IL7R-TOX-TCF7.T
CRIP1	0.00010518	0.576104	0.636	0.576	1	GBM.rec	CRIP1	0.06	L3-IL7R-TOX-TCF7.T
IFITM1	0.000192999	0.602158	0.591	0.497	1	GBM.rec	IFITM1	0.094	L3-IL7R-TOX-TCF7.T
CCL5	0.000273859	0.353214	0.92	0.932	1	GBM.rec	CCL5	-0.012	L3-IL7R-TOX-TCF7.T
CCL4	0.00065052	0.330578	0.909	0.888	1	GBM.rec	CCL4	0.021	L3-IL7R-TOX-TCF7.T
SELENOK	0.000723967	0.425752	0.705	0.815	1	GBM.rec	SELENOK	-0.11	L3-IL7R-TOX-TCF7.T
ERAP1	0.00122606	0.329359	0.205	0.437	1	GBM.rec	ERAP1	-0.232	L3-IL7R-TOX-TCF7.T
TUBA4A	0.00147939	0.362119	0.761	0.84	1	GBM.rec	TUBA4A	-0.079	L3-IL7R-TOX-TCF7.T
CDC42SE1	0.00167002	0.348525	0.682	0.701	1	GBM.rec	CDC42SE1	-0.019	L3-IL7R-TOX-TCF7.T
GNG2	0.00198897	0.434729	0.67	0.752	1	GBM.rec	GNG2	-0.082	L3-IL7R-TOX-TCF7.T
BRAP	0.0021593	0.338598	0.125	0.298	1	GBM.rec	BRAP	-0.173	L3-IL7R-TOX-TCF7.T
SMCHD1	0.0030663	0.3774	0.909	0.897	1	GBM.rec	SMCHD1	0.012	L3-IL7R-TOX-TCF7.T
LITAF	0.00345408	0.394112	0.761	0.806	1	GBM.rec	LITAF	-0.045	L3-IL7R-TOX-TCF7.T
SRRM1	0.00407018	0.339489	0.75	0.834	1	GBM.rec	SRRM1	-0.084	L3-IL7R-TOX-TCF7.T
FAM120B	0.00837967	0.32955	0.102	0.253	1	GBM.rec	FAM120B	-0.151	L3-IL7R-TOX-TCF7.T
DENND4C	0.00930004	0.345309	0.239	0.447	1	GBM.rec	DENND4C	-0.208	L3-IL7R-TOX-TCF7.T
CEMIP2	0.00963353	0.40894	0.739	0.825	1	GBM.rec	CEMIP2	-0.086	L3-IL7R-TOX-TCF7.T
S100A10	0.00963828	0.352696	0.841	0.866	1	GBM.rec	S100A10	-0.025	L3-IL7R-TOX-TCF7.T
GBP4	9.56221e-23	0.571944	0.75	0.268	1.39656e-18	GBM.PD1	GBP4	0.482	L3-IL7R-TOX-TCF7.T
GBP1	4.7409e-22	0.731126	0.734	0.282	6.92409e-18	GBM.PD1	GBP1	0.452	L3-IL7R-TOX-TCF7.T
GPR171	8.59827e-22	0.676147	0.802	0.309	1.25578e-17	GBM.PD1	GPR171	0.493	L3-IL7R-TOX-TCF7.T
ERAP2	1.09025e-18	0.504691	0.768	0.329	1.59231e-14	GBM.PD1	ERAP2	0.439	L3-IL7R-TOX-TCF7.T
KIAA1551	2.85863e-18	0.674735	0.914	0.644	4.17503e-14	GBM.PD1	KIAA1551	0.27	L3-IL7R-TOX-TCF7.T
MIAT	7.32065e-18	0.664808	0.652	0.248	1.06918e-13	GBM.PD1	MIAT	0.404	L3-IL7R-TOX-TCF7.T
STAT1	4.7767e-17	0.639407	0.828	0.503	6.97638e-13	GBM.PD1	STAT1	0.325	L3-IL7R-TOX-TCF7.T
FKBP5	9.24845e-17	0.489142	0.932	0.698	1.35074e-12	GBM.PD1	FKBP5	0.234	L3-IL7R-TOX-TCF7.T
TRIM56	1.42787e-16	0.579775	0.712	0.315	2.0854e-12	GBM.PD1	TRIM56	0.397	L3-IL7R-TOX-TCF7.T
NEAT1	4.01591e-16	0.717572	0.974	0.812	5.86523e-12	GBM.PD1	NEAT1	0.162	L3-IL7R-TOX-TCF7.T
ENTPD1	4.66295e-16	0.456952	0.494	0.101	6.81024e-12	GBM.PD1	ENTPD1	0.393	L3-IL7R-TOX-TCF7.T
APC	7.5423e-16	0.354475	0.576	0.168	1.10155e-11	GBM.PD1	APC	0.408	L3-IL7R-TOX-TCF7.T
TYMP	2.59498e-15	0.57197	0.754	0.403	3.78997e-11	GBM.PD1	TYMP	0.351	L3-IL7R-TOX-TCF7.T
GPR155	3.28503e-15	0.42127	0.616	0.201	4.79779e-11	GBM.PD1	GPR155	0.415	L3-IL7R-TOX-TCF7.T
IKZF3	3.98659e-15	0.481175	0.87	0.537	5.82242e-11	GBM.PD1	IKZF3	0.333	L3-IL7R-TOX-TCF7.T
CD84	4.12482e-15	0.439275	0.786	0.43	6.0243e-11	GBM.PD1	CD84	0.356	L3-IL7R-TOX-TCF7.T
PARP9	4.46979e-15	0.427286	0.664	0.242	6.52812e-11	GBM.PD1	PARP9	0.422	L3-IL7R-TOX-TCF7.T
FDXR	4.7074e-15	0.351494	0.36	0.027	6.87516e-11	GBM.PD1	FDXR	0.333	L3-IL7R-TOX-TCF7.T
CTLA4	5.10251e-15	0.536774	0.578	0.188	7.45222e-11	GBM.PD1	CTLA4	0.39	L3-IL7R-TOX-TCF7.T
SELL	5.46229e-15	0.452781	0.564	0.161	7.97767e-11	GBM.PD1	SELL	0.403	L3-IL7R-TOX-TCF7.T
ATF3	6.02349e-15	0.5178	0.684	0.309	8.79731e-11	GBM.PD1	ATF3	0.375	L3-IL7R-TOX-TCF7.T
IRF9	8.95993e-15	0.4419	0.584	0.208	1.3086e-10	GBM.PD1	IRF9	0.376	L3-IL7R-TOX-TCF7.T
P2RX5	9.45994e-15	0.340198	0.398	0.047	1.38162e-10	GBM.PD1	P2RX5	0.351	L3-IL7R-TOX-TCF7.T
PARP14	1.67533e-14	0.488062	0.786	0.45	2.44682e-10	GBM.PD1	PARP14	0.336	L3-IL7R-TOX-TCF7.T
EPSTI1	1.69378e-14	0.347417	0.672	0.262	2.47376e-10	GBM.PD1	EPSTI1	0.41	L3-IL7R-TOX-TCF7.T
ITK	1.71126e-14	0.376298	0.852	0.436	2.49929e-10	GBM.PD1	ITK	0.416	L3-IL7R-TOX-TCF7.T
RNF213	2.01275e-14	0.434441	0.954	0.772	2.93962e-10	GBM.PD1	RNF213	0.182	L3-IL7R-TOX-TCF7.T
GBP2	2.30626e-14	0.43313	0.804	0.436	3.3683e-10	GBM.PD1	GBP2	0.368	L3-IL7R-TOX-TCF7.T
NCOA1	2.63687e-14	0.383339	0.644	0.228	3.85114e-10	GBM.PD1	NCOA1	0.416	L3-IL7R-TOX-TCF7.T
ATRX	2.68173e-14	0.459198	0.876	0.564	3.91667e-10	GBM.PD1	ATRX	0.312	L3-IL7R-TOX-TCF7.T
FAM102A	2.83758e-14	0.45508	0.792	0.403	4.14428e-10	GBM.PD1	FAM102A	0.389	L3-IL7R-TOX-TCF7.T
ZNF148	5.25282e-14	0.328714	0.672	0.228	7.67175e-10	GBM.PD1	ZNF148	0.444	L3-IL7R-TOX-TCF7.T
SAMD9	5.74661e-14	0.414733	0.74	0.342	8.39293e-10	GBM.PD1	SAMD9	0.398	L3-IL7R-TOX-TCF7.T
MALT1	1.05567e-13	0.442264	0.72	0.336	1.54181e-09	GBM.PD1	MALT1	0.384	L3-IL7R-TOX-TCF7.T
LINS1	1.32853e-13	0.325856	0.576	0.174	1.94032e-09	GBM.PD1	LINS1	0.402	L3-IL7R-TOX-TCF7.T
SLFN5	1.43021e-13	0.486757	0.804	0.49	2.08883e-09	GBM.PD1	SLFN5	0.314	L3-IL7R-TOX-TCF7.T
CFLAR	1.53707e-13	0.448468	0.908	0.651	2.24489e-09	GBM.PD1	CFLAR	0.257	L3-IL7R-TOX-TCF7.T
KLRD1	1.86502e-13	0.630828	0.684	0.309	2.72386e-09	GBM.PD1	KLRD1	0.375	L3-IL7R-TOX-TCF7.T
SETX	2.5118e-13	0.41933	0.75	0.349	3.66849e-09	GBM.PD1	SETX	0.401	L3-IL7R-TOX-TCF7.T
ODF2L	2.64148e-13	0.362473	0.778	0.389	3.85789e-09	GBM.PD1	ODF2L	0.389	L3-IL7R-TOX-TCF7.T
DIP2A	2.75166e-13	0.414401	0.77	0.376	4.0188e-09	GBM.PD1	DIP2A	0.394	L3-IL7R-TOX-TCF7.T
GCC2	5.83838e-13	0.485645	0.884	0.597	8.52695e-09	GBM.PD1	GCC2	0.287	L3-IL7R-TOX-TCF7.T
SAMHD1	5.85156e-13	0.436826	0.75	0.416	8.5462e-09	GBM.PD1	SAMHD1	0.334	L3-IL7R-TOX-TCF7.T
KPNA6	6.59148e-13	0.367157	0.578	0.195	9.62686e-09	GBM.PD1	KPNA6	0.383	L3-IL7R-TOX-TCF7.T
PNISR	6.91849e-13	0.336911	0.918	0.738	1.01045e-08	GBM.PD1	PNISR	0.18	L3-IL7R-TOX-TCF7.T
SSH2	7.11043e-13	0.350055	0.752	0.409	1.03848e-08	GBM.PD1	SSH2	0.343	L3-IL7R-TOX-TCF7.T
CD226	7.90483e-13	0.323066	0.586	0.215	1.1545e-08	GBM.PD1	CD226	0.371	L3-IL7R-TOX-TCF7.T
SETD2	8.0836e-13	0.375457	0.764	0.396	1.18061e-08	GBM.PD1	SETD2	0.368	L3-IL7R-TOX-TCF7.T
TSHZ2	8.81132e-13	0.360858	0.32	0.027	1.28689e-08	GBM.PD1	TSHZ2	0.293	L3-IL7R-TOX-TCF7.T
ATXN2	9.24091e-13	0.349557	0.552	0.188	1.34964e-08	GBM.PD1	ATXN2	0.364	L3-IL7R-TOX-TCF7.T
CTCF	9.30862e-13	0.38693	0.69	0.289	1.35952e-08	GBM.PD1	CTCF	0.401	L3-IL7R-TOX-TCF7.T
ZMAT3	1.25258e-12	0.324481	0.54	0.181	1.82939e-08	GBM.PD1	ZMAT3	0.359	L3-IL7R-TOX-TCF7.T
KLRC1	1.54425e-12	0.359983	0.398	0.074	2.25538e-08	GBM.PD1	KLRC1	0.324	L3-IL7R-TOX-TCF7.T
ITPR2	1.66116e-12	0.337276	0.662	0.309	2.42612e-08	GBM.PD1	ITPR2	0.353	L3-IL7R-TOX-TCF7.T
TNRC6B	2.1624e-12	0.437965	0.866	0.55	3.15819e-08	GBM.PD1	TNRC6B	0.316	L3-IL7R-TOX-TCF7.T
ME2	2.80155e-12	0.370452	0.606	0.242	4.09166e-08	GBM.PD1	ME2	0.364	L3-IL7R-TOX-TCF7.T
LBR	3.42549e-12	0.337446	0.756	0.369	5.00292e-08	GBM.PD1	LBR	0.387	L3-IL7R-TOX-TCF7.T
HERC4	4.40427e-12	0.356095	0.622	0.242	6.43243e-08	GBM.PD1	HERC4	0.38	L3-IL7R-TOX-TCF7.T
ZNF37A	5.8433e-12	0.324002	0.5	0.161	8.53414e-08	GBM.PD1	ZNF37A	0.339	L3-IL7R-TOX-TCF7.T
XRN1	5.96426e-12	0.41092	0.744	0.403	8.7108e-08	GBM.PD1	XRN1	0.341	L3-IL7R-TOX-TCF7.T
PPP1R14B	6.79773e-12	0.642639	0.632	0.336	9.92808e-08	GBM.PD1	PPP1R14B	0.296	L3-IL7R-TOX-TCF7.T
MDM2	8.80876e-12	0.3415	0.636	0.282	1.28652e-07	GBM.PD1	MDM2	0.354	L3-IL7R-TOX-TCF7.T
CXCL9	1.04488e-11	0.567595	0.254	0	1.52604e-07	GBM.PD1	CXCL9	0.254	L3-IL7R-TOX-TCF7.T
ZNF791	1.18558e-11	0.355491	0.704	0.336	1.73154e-07	GBM.PD1	ZNF791	0.368	L3-IL7R-TOX-TCF7.T
TP53INP1	1.36917e-11	0.361667	0.512	0.161	1.99967e-07	GBM.PD1	TP53INP1	0.351	L3-IL7R-TOX-TCF7.T
CREBRF	1.40834e-11	0.377945	0.76	0.409	2.05688e-07	GBM.PD1	CREBRF	0.351	L3-IL7R-TOX-TCF7.T
PDE3B	1.50497e-11	0.398885	0.754	0.356	2.19801e-07	GBM.PD1	PDE3B	0.398	L3-IL7R-TOX-TCF7.T
ABHD17A	1.68766e-11	0.480559	0.796	0.416	2.46483e-07	GBM.PD1	ABHD17A	0.38	L3-IL7R-TOX-TCF7.T
NRDC	1.83925e-11	0.325608	0.73	0.349	2.68622e-07	GBM.PD1	NRDC	0.381	L3-IL7R-TOX-TCF7.T
TMPO	1.98899e-11	0.374306	0.714	0.315	2.90492e-07	GBM.PD1	TMPO	0.399	L3-IL7R-TOX-TCF7.T
TRIM22	2.18039e-11	0.420229	0.832	0.55	3.18446e-07	GBM.PD1	TRIM22	0.282	L3-IL7R-TOX-TCF7.T
SYNRG	2.64612e-11	0.356045	0.846	0.456	3.86466e-07	GBM.PD1	SYNRG	0.39	L3-IL7R-TOX-TCF7.T
FRYL	3.64998e-11	0.405787	0.7	0.322	5.33079e-07	GBM.PD1	FRYL	0.378	L3-IL7R-TOX-TCF7.T
EPB41	3.65109e-11	0.422747	0.758	0.416	5.33242e-07	GBM.PD1	EPB41	0.342	L3-IL7R-TOX-TCF7.T
CCDC88B	4.04716e-11	0.388528	0.632	0.262	5.91088e-07	GBM.PD1	CCDC88B	0.37	L3-IL7R-TOX-TCF7.T
GOLGA4	5.15398e-11	0.376258	0.784	0.51	7.52739e-07	GBM.PD1	GOLGA4	0.274	L3-IL7R-TOX-TCF7.T
AKAP13	5.68615e-11	0.395358	0.942	0.732	8.30462e-07	GBM.PD1	AKAP13	0.21	L3-IL7R-TOX-TCF7.T
SYNE2	7.1897e-11	0.476082	0.876	0.698	1.05006e-06	GBM.PD1	SYNE2	0.178	L3-IL7R-TOX-TCF7.T
SMG1	7.46148e-11	0.347581	0.812	0.483	1.08975e-06	GBM.PD1	SMG1	0.329	L3-IL7R-TOX-TCF7.T
CCR7	1.03711e-10	0.364728	0.512	0.181	1.5147e-06	GBM.PD1	CCR7	0.331	L3-IL7R-TOX-TCF7.T
IKZF1	1.21162e-10	0.406557	0.93	0.698	1.76957e-06	GBM.PD1	IKZF1	0.232	L3-IL7R-TOX-TCF7.T
THRAP3	1.26887e-10	0.330277	0.82	0.477	1.85318e-06	GBM.PD1	THRAP3	0.343	L3-IL7R-TOX-TCF7.T
PRRC2C	1.94536e-10	0.349209	0.946	0.745	2.8412e-06	GBM.PD1	PRRC2C	0.201	L3-IL7R-TOX-TCF7.T
RIF1	2.71095e-10	0.437753	0.71	0.389	3.95934e-06	GBM.PD1	RIF1	0.321	L3-IL7R-TOX-TCF7.T
GBP5	2.93517e-10	0.401904	0.818	0.53	4.28682e-06	GBM.PD1	GBP5	0.288	L3-IL7R-TOX-TCF7.T
GOLGB1	3.94643e-10	0.327339	0.79	0.503	5.76376e-06	GBM.PD1	GOLGB1	0.287	L3-IL7R-TOX-TCF7.T
BOD1L1	4.31942e-10	0.351488	0.796	0.45	6.30852e-06	GBM.PD1	BOD1L1	0.346	L3-IL7R-TOX-TCF7.T
IL7R	5.01286e-10	0.419153	0.864	0.55	7.32128e-06	GBM.PD1	IL7R	0.314	L3-IL7R-TOX-TCF7.T
PIK3IP1	6.56616e-10	0.3283	0.914	0.651	9.58988e-06	GBM.PD1	PIK3IP1	0.263	L3-IL7R-TOX-TCF7.T
TRDC	8.2347e-10	0.344313	0.328	0.06	1.20268e-05	GBM.PD1	TRDC	0.268	L3-IL7R-TOX-TCF7.T
CCSER2	8.40963e-10	0.364397	0.82	0.497	1.22823e-05	GBM.PD1	CCSER2	0.323	L3-IL7R-TOX-TCF7.T
NLRP1	1.02496e-09	0.326716	0.6	0.248	1.49695e-05	GBM.PD1	NLRP1	0.352	L3-IL7R-TOX-TCF7.T
NKTR	1.69024e-09	0.32773	0.9	0.624	2.46859e-05	GBM.PD1	NKTR	0.276	L3-IL7R-TOX-TCF7.T
TTC14	2.4388e-09	0.324155	0.734	0.416	3.56187e-05	GBM.PD1	TTC14	0.318	L3-IL7R-TOX-TCF7.T
PHF3	3.01854e-09	0.356821	0.738	0.436	4.40858e-05	GBM.PD1	PHF3	0.302	L3-IL7R-TOX-TCF7.T
PRPF40A	3.19371e-09	0.322593	0.832	0.49	4.66441e-05	GBM.PD1	PRPF40A	0.342	L3-IL7R-TOX-TCF7.T
HLA-DQA1	7.44989e-09	0.437494	0.668	0.356	0.000108806	GBM.PD1	HLA-DQA1	0.312	L3-IL7R-TOX-TCF7.T
VMP1	1.15033e-08	0.341318	0.752	0.436	0.000168006	GBM.PD1	VMP1	0.316	L3-IL7R-TOX-TCF7.T
FAM126B	2.18182e-08	0.332333	0.53	0.228	0.000318655	GBM.PD1	FAM126B	0.302	L3-IL7R-TOX-TCF7.T
CYLD	8.94986e-08	0.324175	0.804	0.503	0.00130713	GBM.PD1	CYLD	0.301	L3-IL7R-TOX-TCF7.T
RBM33	1.21156e-07	0.36463	0.704	0.376	0.00176949	GBM.PD1	RBM33	0.328	L3-IL7R-TOX-TCF7.T
SP110	1.23636e-07	0.341658	0.796	0.497	0.0018057	GBM.PD1	SP110	0.299	L3-IL7R-TOX-TCF7.T
UTRN	2.04915e-07	0.363632	0.802	0.53	0.00299279	GBM.PD1	UTRN	0.272	L3-IL7R-TOX-TCF7.T
ADD1	8.24265e-07	0.337196	0.7	0.383	0.0120384	GBM.PD1	ADD1	0.317	L3-IL7R-TOX-TCF7.T
CH25H	2.77101e-06	0.328352	0.322	0.114	0.0404707	GBM.PD1	CH25H	0.208	L3-IL7R-TOX-TCF7.T
CREG1	3.4277e-06	0.357396	0.38	0.168	0.0500616	GBM.PD1	CREG1	0.212	L3-IL7R-TOX-TCF7.T
HLA-DRB1	3.93678e-06	0.390685	0.87	0.671	0.0574967	GBM.PD1	HLA-DRB1	0.199	L3-IL7R-TOX-TCF7.T
MAFB	1.01699e-05	0.389613	0.35	0.161	0.148532	GBM.PD1	MAFB	0.189	L3-IL7R-TOX-TCF7.T
SGK1	1.87379e-05	0.358493	0.5	0.255	0.273667	GBM.PD1	SGK1	0.245	L3-IL7R-TOX-TCF7.T
PSAP	0.000147763	0.371381	0.804	0.564	1	GBM.PD1	PSAP	0.24	L3-IL7R-TOX-TCF7.T
CYB5D2	0.000154573	0.369088	0.268	0.107	1	GBM.PD1	CYB5D2	0.161	L3-IL7R-TOX-TCF7.T
CTSB	0.000240094	0.354259	0.716	0.463	1	GBM.PD1	CTSB	0.253	L3-IL7R-TOX-TCF7.T
PLCG2	0.00225065	0.414674	0.73	0.53	1	GBM.PD1	PLCG2	0.2	L3-IL7R-TOX-TCF7.T
MS4A7	0.00412108	0.437837	0.348	0.221	1	GBM.PD1	MS4A7	0.127	L3-IL7R-TOX-TCF7.T
SPP1	2.74368e-12	0.800165	0.88	0.655	4.00715e-08	GBM.new	SPP1	0.225	L4-Treg
HLA-DRB5	1.24923e-07	0.496946	0.48	0.262	0.0018245	GBM.new	HLA-DRB5	0.218	L4-Treg
CBFB	1.02613e-06	0.419178	0.456	0.257	0.0149866	GBM.new	CBFB	0.199	L4-Treg
LGALS1	2.32272e-06	0.685004	0.784	0.692	0.0339233	GBM.new	LGALS1	0.092	L4-Treg
BIRC3	2.60836e-05	0.476084	0.712	0.599	0.380951	GBM.new	BIRC3	0.113	L4-Treg
CTSC	3.3803e-05	0.386287	0.856	0.814	0.493693	GBM.new	CTSC	0.042	L4-Treg
CD14	8.92532e-05	0.333288	0.328	0.182	1	GBM.new	CD14	0.146	L4-Treg
PGK1	0.000194695	0.349115	0.808	0.744	1	GBM.new	PGK1	0.064	L4-Treg
CAPG	0.000484942	0.365506	0.472	0.346	1	GBM.new	CAPG	0.126	L4-Treg
COX17	0.00162932	0.376454	0.576	0.487	1	GBM.new	COX17	0.089	L4-Treg
CMPK1	0.004814	0.392612	0.408	0.327	1	GBM.new	CMPK1	0.081	L4-Treg
VMP1	0.00621161	0.385515	0.568	0.46	1	GBM.new	VMP1	0.108	L4-Treg
GLRX	0.00621469	0.406414	0.696	0.651	1	GBM.new	GLRX	0.045	L4-Treg
PRMT9	0.0073078	0.461857	0.28	0.192	1	GBM.new	PRMT9	0.088	L4-Treg
ABHD3	0.0088461	0.3833	0.264	0.173	1	GBM.new	ABHD3	0.091	L4-Treg
RAB11FIP1	0.00928615	0.329541	0.504	0.413	1	GBM.new	RAB11FIP1	0.091	L4-Treg
IL2RA	0.00946087	0.489164	0.52	0.46	1	GBM.new	IL2RA	0.06	L4-Treg
SYPL1	0.00997494	0.347398	0.312	0.219	1	GBM.new	SYPL1	0.093	L4-Treg
HLA-DRB51	1.06115e-07	0.339425	0.48	0.253	0.00154981	GBM.rec	HLA-DRB5	0.227	L4-Treg
CISH	3.35191e-06	0.585433	0.287	0.144	0.0489546	GBM.rec	CISH	0.143	L4-Treg
CD141	7.35585e-06	0.592932	0.327	0.177	0.107432	GBM.rec	CD14	0.15	L4-Treg
ANXA2	1.74149e-05	0.386529	0.653	0.505	0.254345	GBM.rec	ANXA2	0.148	L4-Treg
VIM	3.15409e-05	0.417952	0.96	0.888	0.460655	GBM.rec	VIM	0.072	L4-Treg
ARF5	0.000259369	0.355678	0.447	0.304	1	GBM.rec	ARF5	0.143	L4-Treg
IER2	0.000932369	0.422276	0.72	0.622	1	GBM.rec	IER2	0.098	L4-Treg
IFITM1	0.000941446	0.401471	0.413	0.283	1	GBM.rec	IFITM1	0.13	L4-Treg
RNASEK	0.00110066	0.445981	0.28	0.174	1	GBM.rec	RNASEK	0.106	L4-Treg
TLE4	0.00208964	0.373435	0.3	0.203	1	GBM.rec	TLE4	0.097	L4-Treg
IFITM3	0.00254775	0.568668	0.293	0.2	1	GBM.rec	IFITM3	0.093	L4-Treg
ITM2C	0.00526353	0.443666	0.313	0.209	1	GBM.rec	ITM2C	0.104	L4-Treg
CCDC85B	0.00623418	0.3762	0.627	0.555	1	GBM.rec	CCDC85B	0.072	L4-Treg
EMP3	0.0063706	0.355938	0.76	0.736	1	GBM.rec	EMP3	0.024	L4-Treg
FMNL1	0.00660074	0.35993	0.54	0.456	1	GBM.rec	FMNL1	0.084	L4-Treg
TIMP1	0.00765154	0.360266	0.48	0.382	1	GBM.rec	TIMP1	0.098	L4-Treg
GBP2	1.10982e-11	0.514154	0.749	0.553	1.6209e-07	GBM.PD1	GBP2	0.196	L4-Treg
STAT1	2.36825e-10	0.405175	0.574	0.356	3.45884e-06	GBM.PD1	STAT1	0.218	L4-Treg
RARRES3	2.43207e-09	0.327472	0.722	0.487	3.55205e-05	GBM.PD1	RARRES3	0.235	L4-Treg
LAG3	3.32308e-09	0.802174	0.403	0.204	4.85336e-05	GBM.PD1	LAG3	0.199	L4-Treg
CST7	5.60845e-09	0.445175	0.728	0.531	8.19114e-05	GBM.PD1	CST7	0.197	L4-Treg
CTLA4	1.00491e-08	0.388996	0.741	0.56	0.000146768	GBM.PD1	CTLA4	0.181	L4-Treg
ENTPD1	3.10707e-08	0.392601	0.464	0.265	0.000453788	GBM.PD1	ENTPD1	0.199	L4-Treg
FCMR	6.16479e-08	0.382288	0.399	0.207	0.000900367	GBM.PD1	FCMR	0.192	L4-Treg
FOXP3	9.54599e-08	0.379696	0.511	0.305	0.00139419	GBM.PD1	FOXP3	0.206	L4-Treg
CD7	1.05725e-07	0.391659	0.802	0.633	0.00154412	GBM.PD1	CD7	0.169	L4-Treg
CXCR6	6.46054e-07	0.36647	0.572	0.385	0.00943561	GBM.PD1	CXCR6	0.187	L4-Treg
ICOS	7.88117e-07	0.364597	0.713	0.538	0.0115104	GBM.PD1	ICOS	0.175	L4-Treg
ICA1	7.95086e-07	0.534563	0.293	0.145	0.0116122	GBM.PD1	ICA1	0.148	L4-Treg
SIRPG	8.62518e-06	0.338305	0.479	0.32	0.125971	GBM.PD1	SIRPG	0.159	L4-Treg
RHBDD2	1.2532e-05	0.423642	0.504	0.367	0.183031	GBM.PD1	RHBDD2	0.137	L4-Treg
CARD16	3.53604e-05	0.452877	0.762	0.68	0.516439	GBM.PD1	CARD16	0.082	L4-Treg
EVI2A	4.73091e-05	0.330902	0.534	0.404	0.690949	GBM.PD1	EVI2A	0.13	L4-Treg
LAIR2	0.0017857	0.329538	0.395	0.28	1	GBM.PD1	LAIR2	0.115	L4-Treg
CCL4	0.00609891	0.475349	0.643	0.538	1	GBM.PD1	CCL4	0.105	L4-Treg
CCL4L2	0.00952116	0.455541	0.39	0.287	1	GBM.PD1	CCL4L2	0.103	L4-Treg
SPP1	3.26781e-37	1.36824	0.882	0.6	4.77264e-33	GBM.new	SPP1	0.282	L5-XCL1/2-GZMA/B-KLRB1-PRF1.T
IL1B	0.000715675	0.800392	0.28	0.189	1	GBM.new	IL1B	0.091	L5-XCL1/2-GZMA/B-KLRB1-PRF1.T
C3	0.0026708	0.37447	0.265	0.177	1	GBM.new	C3	0.088	L5-XCL1/2-GZMA/B-KLRB1-PRF1.T
APOC1	0.00566925	0.492046	0.464	0.367	1	GBM.new	APOC1	0.097	L5-XCL1/2-GZMA/B-KLRB1-PRF1.T
NCR3	5.0975e-22	0.649445	0.359	0.114	7.4449e-18	GBM.rec	NCR3	0.245	L5-XCL1/2-GZMA/B-KLRB1-PRF1.T
CTSW	6.66425e-22	0.674484	0.891	0.723	9.73314e-18	GBM.rec	CTSW	0.168	L5-XCL1/2-GZMA/B-KLRB1-PRF1.T
PTPRCAP	4.16635e-21	1.18023	0.293	0.077	6.08496e-17	GBM.rec	PTPRCAP	0.216	L5-XCL1/2-GZMA/B-KLRB1-PRF1.T
IFITM1	4.30446e-20	0.839505	0.586	0.311	6.28666e-16	GBM.rec	IFITM1	0.275	L5-XCL1/2-GZMA/B-KLRB1-PRF1.T
PPDPF	8.14552e-14	0.51343	0.77	0.624	1.18965e-09	GBM.rec	PPDPF	0.146	L5-XCL1/2-GZMA/B-KLRB1-PRF1.T
IFITM3	1.21771e-13	0.763141	0.431	0.225	1.77847e-09	GBM.rec	IFITM3	0.206	L5-XCL1/2-GZMA/B-KLRB1-PRF1.T
KRT86	1.0948e-12	0.720115	0.322	0.136	1.59896e-08	GBM.rec	KRT86	0.186	L5-XCL1/2-GZMA/B-KLRB1-PRF1.T
CD7	1.43695e-10	0.440033	0.852	0.738	2.09867e-06	GBM.rec	CD7	0.114	L5-XCL1/2-GZMA/B-KLRB1-PRF1.T
RAC2	5.03086e-10	0.36919	0.793	0.639	7.34757e-06	GBM.rec	RAC2	0.154	L5-XCL1/2-GZMA/B-KLRB1-PRF1.T
GABARAP	5.98905e-10	0.619263	0.345	0.181	8.74701e-06	GBM.rec	GABARAP	0.164	L5-XCL1/2-GZMA/B-KLRB1-PRF1.T
LY6E	3.68171e-09	0.458552	0.747	0.62	5.37714e-05	GBM.rec	LY6E	0.127	L5-XCL1/2-GZMA/B-KLRB1-PRF1.T
KRT81	7.46772e-09	0.492546	0.26	0.117	0.000109066	GBM.rec	KRT81	0.143	L5-XCL1/2-GZMA/B-KLRB1-PRF1.T
CLIC3	1.02292e-07	0.466498	0.579	0.436	0.00149397	GBM.rec	CLIC3	0.143	L5-XCL1/2-GZMA/B-KLRB1-PRF1.T
IL2RB	1.05356e-07	0.389829	0.622	0.459	0.00153872	GBM.rec	IL2RB	0.163	L5-XCL1/2-GZMA/B-KLRB1-PRF1.T
ACTB	1.18312e-07	0.390112	0.997	0.971	0.00172794	GBM.rec	ACTB	0.026	L5-XCL1/2-GZMA/B-KLRB1-PRF1.T
HSH2D	3.78045e-07	0.426328	0.339	0.197	0.00552135	GBM.rec	HSH2D	0.142	L5-XCL1/2-GZMA/B-KLRB1-PRF1.T
BST2	3.89044e-07	0.392445	0.582	0.455	0.00568199	GBM.rec	BST2	0.127	L5-XCL1/2-GZMA/B-KLRB1-PRF1.T
MIF	7.73036e-07	0.351896	0.526	0.374	0.0112902	GBM.rec	MIF	0.152	L5-XCL1/2-GZMA/B-KLRB1-PRF1.T
PFN1	9.6899e-07	0.32618	0.947	0.886	0.0141521	GBM.rec	PFN1	0.061	L5-XCL1/2-GZMA/B-KLRB1-PRF1.T
CALM3	1.25424e-06	0.373875	0.523	0.39	0.0183182	GBM.rec	CALM3	0.133	L5-XCL1/2-GZMA/B-KLRB1-PRF1.T
CEMIP2	1.86943e-06	0.366591	0.569	0.435	0.027303	GBM.rec	CEMIP2	0.134	L5-XCL1/2-GZMA/B-KLRB1-PRF1.T
TMIGD2	2.24026e-06	0.344488	0.359	0.224	0.032719	GBM.rec	TMIGD2	0.135	L5-XCL1/2-GZMA/B-KLRB1-PRF1.T
NR4A1	6.39245e-06	0.386429	0.414	0.278	0.0933618	GBM.rec	NR4A1	0.136	L5-XCL1/2-GZMA/B-KLRB1-PRF1.T
ALDOA	1.07037e-05	0.418644	0.266	0.157	0.156327	GBM.rec	ALDOA	0.109	L5-XCL1/2-GZMA/B-KLRB1-PRF1.T
PNPLA2	1.14491e-05	0.348552	0.299	0.186	0.167214	GBM.rec	PNPLA2	0.113	L5-XCL1/2-GZMA/B-KLRB1-PRF1.T
HOPX	3.28102e-05	0.329237	0.602	0.499	0.479193	GBM.rec	HOPX	0.103	L5-XCL1/2-GZMA/B-KLRB1-PRF1.T
CTSA	4.80856e-05	0.353318	0.293	0.194	0.702291	GBM.rec	CTSA	0.099	L5-XCL1/2-GZMA/B-KLRB1-PRF1.T
CCL5	6.55166e-05	0.345807	0.872	0.867	0.956871	GBM.rec	CCL5	0.005	L5-XCL1/2-GZMA/B-KLRB1-PRF1.T
TAGAP	0.00018633	0.351786	0.428	0.326	1	GBM.rec	TAGAP	0.102	L5-XCL1/2-GZMA/B-KLRB1-PRF1.T
PRKX	0.000212067	0.360486	0.319	0.225	1	GBM.rec	PRKX	0.094	L5-XCL1/2-GZMA/B-KLRB1-PRF1.T
IFI6	0.000977758	0.604878	0.332	0.255	1	GBM.rec	IFI6	0.077	L5-XCL1/2-GZMA/B-KLRB1-PRF1.T
ISG15	0.00123769	0.717958	0.487	0.403	1	GBM.rec	ISG15	0.084	L5-XCL1/2-GZMA/B-KLRB1-PRF1.T
METRNL	0.00466822	0.425956	0.388	0.323	1	GBM.rec	METRNL	0.065	L5-XCL1/2-GZMA/B-KLRB1-PRF1.T
SOCS1	0.00564706	0.365853	0.451	0.391	1	GBM.rec	SOCS1	0.06	L5-XCL1/2-GZMA/B-KLRB1-PRF1.T
GZMK	5.95995e-12	0.578061	0.471	0.272	8.70451e-08	GBM.PD1	GZMK	0.199	L5-XCL1/2-GZMA/B-KLRB1-PRF1.T
STAT1	8.68171e-11	0.479799	0.414	0.243	1.26796e-06	GBM.PD1	STAT1	0.171	L5-XCL1/2-GZMA/B-KLRB1-PRF1.T
CD2	1.48649e-10	0.44912	0.628	0.472	2.17102e-06	GBM.PD1	CD2	0.156	L5-XCL1/2-GZMA/B-KLRB1-PRF1.T
IL7R	2.54446e-09	0.636678	0.334	0.181	3.71618e-05	GBM.PD1	IL7R	0.153	L5-XCL1/2-GZMA/B-KLRB1-PRF1.T
GBP1	3.96574e-08	0.44173	0.315	0.175	0.000579197	GBM.PD1	GBP1	0.14	L5-XCL1/2-GZMA/B-KLRB1-PRF1.T
KIAA1551	6.86474e-08	0.360564	0.563	0.433	0.00100259	GBM.PD1	KIAA1551	0.13	L5-XCL1/2-GZMA/B-KLRB1-PRF1.T
FKBP5	1.03093e-07	0.326364	0.586	0.45	0.00150567	GBM.PD1	FKBP5	0.136	L5-XCL1/2-GZMA/B-KLRB1-PRF1.T
HLA-DRB1	5.68913e-07	0.372092	0.678	0.544	0.00830897	GBM.PD1	HLA-DRB1	0.134	L5-XCL1/2-GZMA/B-KLRB1-PRF1.T
KLRC1	1.26477e-06	0.34006	0.404	0.256	0.0184719	GBM.PD1	KLRC1	0.148	L5-XCL1/2-GZMA/B-KLRB1-PRF1.T
NCF1	1.82542e-06	0.357994	0.279	0.159	0.0266603	GBM.PD1	NCF1	0.12	L5-XCL1/2-GZMA/B-KLRB1-PRF1.T
ZNF292	3.14267e-06	0.339094	0.384	0.25	0.0458988	GBM.PD1	ZNF292	0.134	L5-XCL1/2-GZMA/B-KLRB1-PRF1.T
LAG3	1.70887e-05	0.382912	0.272	0.161	0.24958	GBM.PD1	LAG3	0.111	L5-XCL1/2-GZMA/B-KLRB1-PRF1.T
GBP5	2.4743e-05	0.351378	0.406	0.289	0.361371	GBM.PD1	GBP5	0.117	L5-XCL1/2-GZMA/B-KLRB1-PRF1.T
TRAC	0.000263185	0.347331	0.384	0.285	1	GBM.PD1	TRAC	0.099	L5-XCL1/2-GZMA/B-KLRB1-PRF1.T
DUSP4	0.000269281	0.344967	0.329	0.227	1	GBM.PD1	DUSP4	0.102	L5-XCL1/2-GZMA/B-KLRB1-PRF1.T
SYNE2	0.00121206	0.343398	0.515	0.458	1	GBM.PD1	SYNE2	0.057	L5-XCL1/2-GZMA/B-KLRB1-PRF1.T
CMC1	0.00358655	0.334111	0.534	0.447	1	GBM.PD1	CMC1	0.087	L5-XCL1/2-GZMA/B-KLRB1-PRF1.T
SPP1	1.72027e-14	0.977409	0.771	0.692	2.51245e-10	GBM.new	SPP1	0.079	L6-Proliferating
TPT1	7.1058e-07	0.334692	0.919	0.956	0.010378	GBM.new	TPT1	-0.037	L6-Proliferating
SNHG7	8.0273e-06	0.365063	0.265	0.485	0.117239	GBM.new	SNHG7	-0.22	L6-Proliferating
TMF1	9.69202e-06	0.391702	0.278	0.484	0.141552	GBM.new	TMF1	-0.206	L6-Proliferating
SNX2	2.14757e-05	0.359506	0.211	0.406	0.313652	GBM.new	SNX2	-0.195	L6-Proliferating
RAB9A	3.16568e-05	0.341827	0.184	0.347	0.462347	GBM.new	RAB9A	-0.163	L6-Proliferating
STRAP	3.44351e-05	0.323991	0.278	0.485	0.502924	GBM.new	STRAP	-0.207	L6-Proliferating
ACADVL	5.17157e-05	0.375879	0.287	0.491	0.755308	GBM.new	ACADVL	-0.204	L6-Proliferating
PURA	5.54056e-05	0.32465	0.175	0.332	0.809198	GBM.new	PURA	-0.157	L6-Proliferating
ATG2A	7.40318e-05	0.322735	0.179	0.342	1	GBM.new	ATG2A	-0.163	L6-Proliferating
TGFBR2	0.000107784	0.341972	0.238	0.412	1	GBM.new	TGFBR2	-0.174	L6-Proliferating
SSU72	0.000164884	0.345336	0.345	0.538	1	GBM.new	SSU72	-0.193	L6-Proliferating
HLA-DRB5	0.000195067	0.697225	0.453	0.354	1	GBM.new	HLA-DRB5	0.099	L6-Proliferating
PPP1CB	0.000239386	0.398616	0.39	0.575	1	GBM.new	PPP1CB	-0.185	L6-Proliferating
STK25	0.000248677	0.343385	0.161	0.298	1	GBM.new	STK25	-0.137	L6-Proliferating
CRBN	0.000281154	0.334705	0.211	0.364	1	GBM.new	CRBN	-0.153	L6-Proliferating
POLR1D	0.000284932	0.348213	0.399	0.595	1	GBM.new	POLR1D	-0.196	L6-Proliferating
CXCL8	0.000396217	0.926895	0.269	0.181	1	GBM.new	CXCL8	0.088	L6-Proliferating
COX7A2L	0.000534793	0.455738	0.368	0.583	1	GBM.new	COX7A2L	-0.215	L6-Proliferating
ISCA1	0.000563472	0.393397	0.211	0.362	1	GBM.new	ISCA1	-0.151	L6-Proliferating
DDRGK1	0.000610267	0.363843	0.265	0.427	1	GBM.new	DDRGK1	-0.162	L6-Proliferating
MED4	0.000619889	0.344805	0.314	0.497	1	GBM.new	MED4	-0.183	L6-Proliferating
AP2M1	0.000646745	0.356647	0.435	0.637	1	GBM.new	AP2M1	-0.202	L6-Proliferating
RAB1A	0.000669882	0.445982	0.265	0.423	1	GBM.new	RAB1A	-0.158	L6-Proliferating
RHBDF2	0.000680294	0.326462	0.135	0.26	1	GBM.new	RHBDF2	-0.125	L6-Proliferating
COPS4	0.000980763	0.362113	0.166	0.3	1	GBM.new	COPS4	-0.134	L6-Proliferating
FCGBP	0.0013398	0.536256	0.283	0.198	1	GBM.new	FCGBP	0.085	L6-Proliferating
EIF2S3	0.00138936	0.37145	0.274	0.446	1	GBM.new	EIF2S3	-0.172	L6-Proliferating
AP3B1	0.00147268	0.433329	0.215	0.352	1	GBM.new	AP3B1	-0.137	L6-Proliferating
EXOSC6	0.00148565	0.414594	0.143	0.259	1	GBM.new	EXOSC6	-0.116	L6-Proliferating
ETHE1	0.00162344	0.372703	0.256	0.413	1	GBM.new	ETHE1	-0.157	L6-Proliferating
DDIT3	0.00193937	0.511289	0.197	0.329	1	GBM.new	DDIT3	-0.132	L6-Proliferating
NDUFB5	0.0020996	0.328734	0.309	0.476	1	GBM.new	NDUFB5	-0.167	L6-Proliferating
NEU1	0.00236157	0.438296	0.157	0.273	1	GBM.new	NEU1	-0.116	L6-Proliferating
H1FX	0.00289737	0.398719	0.354	0.514	1	GBM.new	H1FX	-0.16	L6-Proliferating
C1QBP	0.00301315	0.351217	0.336	0.511	1	GBM.new	C1QBP	-0.175	L6-Proliferating
TCERG1	0.00326071	0.330285	0.278	0.44	1	GBM.new	TCERG1	-0.162	L6-Proliferating
DUSP10	0.00423232	0.439269	0.188	0.31	1	GBM.new	DUSP10	-0.122	L6-Proliferating
RBMS1	0.00435766	0.388085	0.309	0.443	1	GBM.new	RBMS1	-0.134	L6-Proliferating
ECH1	0.00464243	0.336822	0.404	0.59	1	GBM.new	ECH1	-0.186	L6-Proliferating
GTF2F2	0.00471069	0.386913	0.22	0.338	1	GBM.new	GTF2F2	-0.118	L6-Proliferating
ELK3	0.00485705	0.390983	0.157	0.264	1	GBM.new	ELK3	-0.107	L6-Proliferating
NUBP2	0.00521612	0.361898	0.269	0.41	1	GBM.new	NUBP2	-0.141	L6-Proliferating
TCEAL8	0.00576379	0.36521	0.224	0.359	1	GBM.new	TCEAL8	-0.135	L6-Proliferating
SUMO1	0.00628716	0.376139	0.457	0.655	1	GBM.new	SUMO1	-0.198	L6-Proliferating
PRKAG1	0.00631255	0.426746	0.215	0.343	1	GBM.new	PRKAG1	-0.128	L6-Proliferating
MRPL19	0.00642589	0.35717	0.188	0.3	1	GBM.new	MRPL19	-0.112	L6-Proliferating
UBALD2	0.00649698	0.325101	0.363	0.521	1	GBM.new	UBALD2	-0.158	L6-Proliferating
RNASEH1	0.00668339	0.334196	0.175	0.281	1	GBM.new	RNASEH1	-0.106	L6-Proliferating
S100A9	0.0071038	0.923323	0.283	0.214	1	GBM.new	S100A9	0.069	L6-Proliferating
TEX264	0.00710484	0.322062	0.323	0.475	1	GBM.new	TEX264	-0.152	L6-Proliferating
GDI2	0.00789211	0.382586	0.417	0.598	1	GBM.new	GDI2	-0.181	L6-Proliferating
PRDX3	0.00962199	0.348455	0.35	0.5	1	GBM.new	PRDX3	-0.15	L6-Proliferating
IFITM1	2.14755e-11	0.785825	0.482	0.282	3.1365e-07	GBM.rec	IFITM1	0.2	L6-Proliferating
HLA-DRB51	1.58068e-10	0.558504	0.536	0.331	2.30859e-06	GBM.rec	HLA-DRB5	0.205	L6-Proliferating
IFITM3	5.84046e-05	0.871929	0.388	0.292	0.852999	GBM.rec	IFITM3	0.096	L6-Proliferating
GSTP1	7.7657e-05	0.473466	0.696	0.679	1	GBM.rec	GSTP1	0.017	L6-Proliferating
NKG7	0.000138051	0.47746	0.705	0.643	1	GBM.rec	NKG7	0.062	L6-Proliferating
PPDPF	0.00014589	0.425512	0.75	0.751	1	GBM.rec	PPDPF	-0.001	L6-Proliferating
IFITM2	0.000262383	0.404064	0.661	0.634	1	GBM.rec	IFITM2	0.027	L6-Proliferating
CTSW	0.000354465	0.62978	0.522	0.474	1	GBM.rec	CTSW	0.048	L6-Proliferating
HMGN2	0.000685904	0.38655	0.768	0.772	1	GBM.rec	HMGN2	-0.004	L6-Proliferating
MIF	0.000817336	0.377983	0.634	0.57	1	GBM.rec	MIF	0.064	L6-Proliferating
SHISA5	0.00233683	0.529231	0.531	0.478	1	GBM.rec	SHISA5	0.053	L6-Proliferating
GABARAP	0.00252282	0.657316	0.446	0.399	1	GBM.rec	GABARAP	0.047	L6-Proliferating
CCL5	0.00344801	0.363323	0.746	0.746	1	GBM.rec	CCL5	0	L6-Proliferating
PSMA6	0.00351162	0.438136	0.326	0.258	1	GBM.rec	PSMA6	0.068	L6-Proliferating
PPIB	0.00677996	0.346921	0.692	0.719	1	GBM.rec	PPIB	-0.027	L6-Proliferating
SLC25A5	0.00884453	0.395614	0.754	0.748	1	GBM.rec	SLC25A5	0.006	L6-Proliferating
CTLA4	1.23663e-45	0.906784	0.544	0.116	1.80609e-41	GBM.PD1	CTLA4	0.428	L6-Proliferating
DUSP4	1.34514e-40	0.765104	0.776	0.38	1.96457e-36	GBM.PD1	DUSP4	0.396	L6-Proliferating
CXCL13	6.35618e-32	2.42014	0.285	0.009	9.2832e-28	GBM.PD1	CXCL13	0.276	L6-Proliferating
ICOS	9.9608e-29	0.585284	0.521	0.181	1.45477e-24	GBM.PD1	ICOS	0.34	L6-Proliferating
GBP2	6.72643e-27	0.504312	0.615	0.3	9.82395e-23	GBM.PD1	GBP2	0.315	L6-Proliferating
ETV7	2.8442e-26	0.326315	0.327	0.051	4.15395e-22	GBM.PD1	ETV7	0.276	L6-Proliferating
ARID5B	1.07103e-25	0.435553	0.675	0.315	1.56424e-21	GBM.PD1	ARID5B	0.36	L6-Proliferating
EPSTI1	2.26045e-25	0.418486	0.587	0.257	3.30139e-21	GBM.PD1	EPSTI1	0.33	L6-Proliferating
BATF	1.27366e-24	0.718462	0.568	0.244	1.86019e-20	GBM.PD1	BATF	0.324	L6-Proliferating
IL6ST	2.90903e-24	0.404736	0.493	0.177	4.24864e-20	GBM.PD1	IL6ST	0.316	L6-Proliferating
GBP4	3.96193e-24	0.494113	0.493	0.199	5.7864e-20	GBM.PD1	GBP4	0.294	L6-Proliferating
SMAP2	6.7118e-24	0.423955	0.705	0.412	9.80258e-20	GBM.PD1	SMAP2	0.293	L6-Proliferating
LYST	2.49275e-23	0.401191	0.586	0.264	3.64067e-19	GBM.PD1	LYST	0.322	L6-Proliferating
STAT1	3.35669e-23	0.517379	0.668	0.38	4.90245e-19	GBM.PD1	STAT1	0.288	L6-Proliferating
GBP5	3.82428e-22	0.422037	0.61	0.311	5.58537e-18	GBM.PD1	GBP5	0.299	L6-Proliferating
TIGIT	8.2665e-22	0.471496	0.54	0.23	1.20732e-17	GBM.PD1	TIGIT	0.31	L6-Proliferating
SAMSN1	9.55708e-22	0.358489	0.762	0.474	1.39581e-17	GBM.PD1	SAMSN1	0.288	L6-Proliferating
PDCD1	2.67778e-21	0.406202	0.488	0.188	3.9109e-17	GBM.PD1	PDCD1	0.3	L6-Proliferating
GALM	1.30951e-20	0.382734	0.617	0.32	1.91254e-16	GBM.PD1	GALM	0.297	L6-Proliferating
CYTOR	4.68319e-20	0.388705	0.794	0.506	6.83979e-16	GBM.PD1	CYTOR	0.288	L6-Proliferating
FABP5	4.76456e-20	0.550601	0.71	0.421	6.95864e-16	GBM.PD1	FABP5	0.289	L6-Proliferating
BIRC3	8.08571e-20	0.440712	0.516	0.221	1.18092e-15	GBM.PD1	BIRC3	0.295	L6-Proliferating
GBP1	1.76606e-19	0.583239	0.565	0.309	2.57933e-15	GBM.PD1	GBP1	0.256	L6-Proliferating
TNFRSF4	4.40711e-19	0.655671	0.315	0.085	6.43659e-15	GBM.PD1	TNFRSF4	0.23	L6-Proliferating
CXCR6	4.57941e-19	0.599549	0.444	0.172	6.68823e-15	GBM.PD1	CXCR6	0.272	L6-Proliferating
ENTPD1	6.24321e-19	0.338312	0.446	0.172	9.11822e-15	GBM.PD1	ENTPD1	0.274	L6-Proliferating
SAMD9L	8.10682e-19	0.407754	0.523	0.242	1.184e-14	GBM.PD1	SAMD9L	0.281	L6-Proliferating
TOX	2.02087e-18	0.394431	0.455	0.188	2.95148e-14	GBM.PD1	TOX	0.267	L6-Proliferating
DUSP2	3.07237e-18	0.444674	0.769	0.474	4.48719e-14	GBM.PD1	DUSP2	0.295	L6-Proliferating
IKZF3	3.0188e-17	0.399358	0.656	0.36	4.40895e-13	GBM.PD1	IKZF3	0.296	L6-Proliferating
RHBDD2	7.0893e-17	0.389131	0.467	0.204	1.03539e-12	GBM.PD1	RHBDD2	0.263	L6-Proliferating
PMAIP1	1.06863e-16	0.426824	0.652	0.387	1.56074e-12	GBM.PD1	PMAIP1	0.265	L6-Proliferating
LAG3	1.3719e-16	0.577053	0.531	0.268	2.00365e-12	GBM.PD1	LAG3	0.263	L6-Proliferating
PYHIN1	1.47581e-16	0.358558	0.559	0.28	2.15541e-12	GBM.PD1	PYHIN1	0.279	L6-Proliferating
ETS1	5.60308e-16	0.339897	0.741	0.454	8.1833e-12	GBM.PD1	ETS1	0.287	L6-Proliferating
RNF213	9.81331e-16	0.340958	0.79	0.577	1.43323e-11	GBM.PD1	RNF213	0.213	L6-Proliferating
RGS1	1.66674e-14	0.404272	0.874	0.622	2.43428e-10	GBM.PD1	RGS1	0.252	L6-Proliferating
GPR171	2.34713e-14	0.347284	0.421	0.19	3.42798e-10	GBM.PD1	GPR171	0.231	L6-Proliferating
KIAA1551	1.65235e-13	0.387904	0.652	0.436	2.41326e-09	GBM.PD1	KIAA1551	0.216	L6-Proliferating
CLIP1	1.89954e-13	0.322875	0.456	0.235	2.77428e-09	GBM.PD1	CLIP1	0.221	L6-Proliferating
HIST1H1C	5.98961e-13	0.413008	0.582	0.329	8.74783e-09	GBM.PD1	HIST1H1C	0.253	L6-Proliferating
SH2D2A	7.41042e-13	0.336153	0.545	0.298	1.08229e-08	GBM.PD1	SH2D2A	0.247	L6-Proliferating
NLRC5	7.48514e-13	0.365102	0.472	0.239	1.09321e-08	GBM.PD1	NLRC5	0.233	L6-Proliferating
SYNE2	3.98057e-12	0.358448	0.673	0.445	5.81362e-08	GBM.PD1	SYNE2	0.228	L6-Proliferating
NIN	7.51144e-12	0.341108	0.458	0.253	1.09705e-07	GBM.PD1	NIN	0.205	L6-Proliferating
PHLDA1	7.90421e-12	0.444398	0.446	0.23	1.15441e-07	GBM.PD1	PHLDA1	0.216	L6-Proliferating
HIST1H1E	3.53987e-11	0.752788	0.477	0.277	5.16998e-07	GBM.PD1	HIST1H1E	0.2	L6-Proliferating
CALU	3.96652e-11	0.364793	0.358	0.159	5.7931e-07	GBM.PD1	CALU	0.199	L6-Proliferating
MARCKSL1	1.23826e-10	0.331137	0.278	0.11	1.80848e-06	GBM.PD1	MARCKSL1	0.168	L6-Proliferating
PSMA2	1.72126e-10	0.323625	0.657	0.416	2.51389e-06	GBM.PD1	PSMA2	0.241	L6-Proliferating
ASPM	2.80139e-10	0.44095	0.432	0.235	4.09143e-06	GBM.PD1	ASPM	0.197	L6-Proliferating
MKI67	1.4394e-09	0.412374	0.572	0.358	2.10225e-05	GBM.PD1	MKI67	0.214	L6-Proliferating
HIST1H1D	1.56116e-09	0.378619	0.47	0.28	2.28007e-05	GBM.PD1	HIST1H1D	0.19	L6-Proliferating
CENPE	2.04142e-08	0.345363	0.393	0.219	0.000298149	GBM.PD1	CENPE	0.174	L6-Proliferating
CD8B	3.49081e-08	0.342188	0.427	0.248	0.000509832	GBM.PD1	CD8B	0.179	L6-Proliferating
HIST1H1B	1.25197e-07	0.697489	0.322	0.181	0.0018285	GBM.PD1	HIST1H1B	0.141	L6-Proliferating
CD8A	3.11715e-07	0.355183	0.493	0.302	0.00455259	GBM.PD1	CD8A	0.191	L6-Proliferating
HIST1H2AG	7.12736e-06	0.408799	0.262	0.143	0.104095	GBM.PD1	HIST1H2AG	0.119	L6-Proliferating
SPP1	4.00663e-06	1.55144	0.833	0.619	0.0585168	GBM.new	SPP1	0.214	L7-pDC-Bcells
HLA-DRB5	0.00108116	0.698925	0.611	0.363	1	GBM.new	HLA-DRB5	0.248	L7-pDC-Bcells
PQLC1	0.00166895	0.405898	0.028	0.283	1	GBM.new	PQLC1	-0.255	L7-pDC-Bcells
CD14	0.00215036	0.852708	0.389	0.181	1	GBM.new	CD14	0.208	L7-pDC-Bcells
CXCL8	0.00450174	1.76447	0.306	0.133	1	GBM.new	CXCL8	0.173	L7-pDC-Bcells
TGFBI	0.0054924	0.499502	0.083	0.341	1	GBM.new	TGFBI	-0.258	L7-pDC-Bcells
SERPINB1	0.00603565	0.490878	0.167	0.447	1	GBM.new	SERPINB1	-0.28	L7-pDC-Bcells
FOSB	0.00634629	0.592345	0.75	0.686	1	GBM.new	FOSB	0.064	L7-pDC-Bcells
MARCKS	0.00722128	0.905387	0.472	0.305	1	GBM.new	MARCKS	0.167	L7-pDC-Bcells
CALR	0.00918623	0.401496	0.417	0.673	1	GBM.new	CALR	-0.256	L7-pDC-Bcells
CCNK	0.00998032	0.401511	0.056	0.27	1	GBM.new	CCNK	-0.214	L7-pDC-Bcells
TIMP2	7.33543e-07	0.858159	0.314	0.071	0.0107134	GBM.rec	TIMP2	0.243	L7-pDC-Bcells
YTHDF3	8.32869e-07	0.668079	0.353	0.09	0.0121641	GBM.rec	YTHDF3	0.263	L7-pDC-Bcells
NFKB1	1.5856e-06	1.24285	0.51	0.218	0.0231577	GBM.rec	NFKB1	0.292	L7-pDC-Bcells
VHL	3.63135e-06	0.512306	0.431	0.142	0.0530359	GBM.rec	VHL	0.289	L7-pDC-Bcells
KMT5A	5.11653e-05	0.401784	0.275	0.076	0.747269	GBM.rec	KMT5A	0.199	L7-pDC-Bcells
MANBA	5.768e-05	0.403208	0.392	0.147	0.842417	GBM.rec	MANBA	0.245	L7-pDC-Bcells
FBXW11	6.18258e-05	0.481788	0.451	0.199	0.902965	GBM.rec	FBXW11	0.252	L7-pDC-Bcells
NINJ1	6.25401e-05	0.471604	0.471	0.194	0.913398	GBM.rec	NINJ1	0.277	L7-pDC-Bcells
ADIPOR2	0.000101939	0.403976	0.255	0.071	1	GBM.rec	ADIPOR2	0.184	L7-pDC-Bcells
FBXW4	0.000238148	0.371133	0.255	0.076	1	GBM.rec	FBXW4	0.179	L7-pDC-Bcells
STAG1	0.000434072	0.37852	0.392	0.156	1	GBM.rec	STAG1	0.236	L7-pDC-Bcells
PPP2R2D	0.000443229	0.426163	0.294	0.1	1	GBM.rec	PPP2R2D	0.194	L7-pDC-Bcells
ZNF24	0.000444024	0.433615	0.471	0.237	1	GBM.rec	ZNF24	0.234	L7-pDC-Bcells
RAB8B	0.000606396	0.45757	0.373	0.166	1	GBM.rec	RAB8B	0.207	L7-pDC-Bcells
PMEPA1	0.000637972	0.566503	0.451	0.227	1	GBM.rec	PMEPA1	0.224	L7-pDC-Bcells
EZR	0.000653455	0.621022	0.824	0.692	1	GBM.rec	EZR	0.132	L7-pDC-Bcells
ELL2	0.000675269	0.627089	0.529	0.275	1	GBM.rec	ELL2	0.254	L7-pDC-Bcells
GNB5	0.000703581	0.786494	0.333	0.147	1	GBM.rec	GNB5	0.186	L7-pDC-Bcells
RASSF1	0.00071105	0.491343	0.431	0.209	1	GBM.rec	RASSF1	0.222	L7-pDC-Bcells
REL	0.000984467	0.882317	0.784	0.692	1	GBM.rec	REL	0.092	L7-pDC-Bcells
NFKBID	0.0012152	0.535145	0.549	0.303	1	GBM.rec	NFKBID	0.246	L7-pDC-Bcells
QKI	0.00126468	0.49185	0.49	0.27	1	GBM.rec	QKI	0.22	L7-pDC-Bcells
SNX9	0.00137137	0.5455	0.569	0.36	1	GBM.rec	SNX9	0.209	L7-pDC-Bcells
GNB2	0.0016339	0.526711	0.627	0.403	1	GBM.rec	GNB2	0.224	L7-pDC-Bcells
TRA2A	0.00172462	0.4884	0.647	0.384	1	GBM.rec	TRA2A	0.263	L7-pDC-Bcells
HECTD1	0.00172558	0.811104	0.471	0.27	1	GBM.rec	HECTD1	0.201	L7-pDC-Bcells
YBX3	0.00181243	0.800365	0.353	0.166	1	GBM.rec	YBX3	0.187	L7-pDC-Bcells
ESYT2	0.00185039	0.640154	0.314	0.142	1	GBM.rec	ESYT2	0.172	L7-pDC-Bcells
PTOV1	0.00201667	0.421761	0.275	0.109	1	GBM.rec	PTOV1	0.166	L7-pDC-Bcells
CSRNP1	0.00203852	0.415199	0.471	0.237	1	GBM.rec	CSRNP1	0.234	L7-pDC-Bcells
CCDC107	0.00204485	0.623964	0.529	0.336	1	GBM.rec	CCDC107	0.193	L7-pDC-Bcells
NUP58	0.00205917	0.333065	0.333	0.142	1	GBM.rec	NUP58	0.191	L7-pDC-Bcells
HIVEP2	0.00206576	0.51777	0.294	0.123	1	GBM.rec	HIVEP2	0.171	L7-pDC-Bcells
BTAF1	0.0020881	0.487187	0.412	0.213	1	GBM.rec	BTAF1	0.199	L7-pDC-Bcells
BAZ1A	0.00208823	0.475046	0.647	0.431	1	GBM.rec	BAZ1A	0.216	L7-pDC-Bcells
ARRB2	0.00220032	0.341447	0.431	0.237	1	GBM.rec	ARRB2	0.194	L7-pDC-Bcells
EIF2AK3	0.00220328	0.524104	0.275	0.114	1	GBM.rec	EIF2AK3	0.161	L7-pDC-Bcells
FMNL1	0.00259575	0.536548	0.549	0.384	1	GBM.rec	FMNL1	0.165	L7-pDC-Bcells
FCGBP	0.00266233	0.384271	0.255	0.095	1	GBM.rec	FCGBP	0.16	L7-pDC-Bcells
LACTB	0.00273597	0.35069	0.294	0.123	1	GBM.rec	LACTB	0.171	L7-pDC-Bcells
CCDC93	0.00288957	0.385636	0.255	0.095	1	GBM.rec	CCDC93	0.16	L7-pDC-Bcells
MAP3K11	0.00297086	0.679722	0.314	0.147	1	GBM.rec	MAP3K11	0.167	L7-pDC-Bcells
NSD2	0.00311	0.662537	0.255	0.104	1	GBM.rec	NSD2	0.151	L7-pDC-Bcells
RBBP7	0.00312437	0.336921	0.471	0.27	1	GBM.rec	RBBP7	0.201	L7-pDC-Bcells
ACYP2	0.00351896	0.360532	0.255	0.104	1	GBM.rec	ACYP2	0.151	L7-pDC-Bcells
GNA13	0.00361597	0.603779	0.471	0.308	1	GBM.rec	GNA13	0.163	L7-pDC-Bcells
AGO2	0.00361666	0.446965	0.333	0.156	1	GBM.rec	AGO2	0.177	L7-pDC-Bcells
FBXO34	0.00371594	0.396835	0.314	0.152	1	GBM.rec	FBXO34	0.162	L7-pDC-Bcells
MS4A7	0.00392273	0.856158	0.412	0.213	1	GBM.rec	MS4A7	0.199	L7-pDC-Bcells
RCOR1	0.00393973	0.335492	0.294	0.133	1	GBM.rec	RCOR1	0.161	L7-pDC-Bcells
SF3B3	0.00451101	0.734322	0.275	0.118	1	GBM.rec	SF3B3	0.157	L7-pDC-Bcells
TGIF2	0.00471461	0.537524	0.333	0.171	1	GBM.rec	TGIF2	0.162	L7-pDC-Bcells
PDCD6IP	0.0052016	0.428229	0.471	0.275	1	GBM.rec	PDCD6IP	0.196	L7-pDC-Bcells
MKNK2	0.00534477	0.735805	0.471	0.303	1	GBM.rec	MKNK2	0.168	L7-pDC-Bcells
TREM2	0.00544999	0.824146	0.333	0.166	1	GBM.rec	TREM2	0.167	L7-pDC-Bcells
RCAN3	0.00564781	0.602223	0.314	0.147	1	GBM.rec	RCAN3	0.167	L7-pDC-Bcells
IL4R	0.00568084	0.770544	0.333	0.156	1	GBM.rec	IL4R	0.177	L7-pDC-Bcells
PRKX	0.00598037	0.370263	0.294	0.133	1	GBM.rec	PRKX	0.161	L7-pDC-Bcells
ICAM1	0.00604694	0.636869	0.392	0.218	1	GBM.rec	ICAM1	0.174	L7-pDC-Bcells
UBAC2	0.00604945	0.527836	0.431	0.251	1	GBM.rec	UBAC2	0.18	L7-pDC-Bcells
ZAP70	0.00623195	0.722846	0.255	0.109	1	GBM.rec	ZAP70	0.146	L7-pDC-Bcells
UBE2D1	0.00651835	0.633438	0.255	0.114	1	GBM.rec	UBE2D1	0.141	L7-pDC-Bcells
ETV3	0.00766949	0.332296	0.314	0.152	1	GBM.rec	ETV3	0.162	L7-pDC-Bcells
RALGAPA1	0.00770929	0.501634	0.353	0.185	1	GBM.rec	RALGAPA1	0.168	L7-pDC-Bcells
ATXN2L	0.00771056	0.515515	0.392	0.223	1	GBM.rec	ATXN2L	0.169	L7-pDC-Bcells
SLC7A6	0.00785295	0.422641	0.353	0.18	1	GBM.rec	SLC7A6	0.173	L7-pDC-Bcells
ICOSLG	0.00805583	0.324513	0.373	0.199	1	GBM.rec	ICOSLG	0.174	L7-pDC-Bcells
UBALD2	0.00840832	0.728482	0.51	0.355	1	GBM.rec	UBALD2	0.155	L7-pDC-Bcells
CREM	0.00881577	0.453006	0.667	0.531	1	GBM.rec	CREM	0.136	L7-pDC-Bcells
DDX21	0.00908301	0.510033	0.686	0.545	1	GBM.rec	DDX21	0.141	L7-pDC-Bcells
SKIL	0.00935078	0.535674	0.588	0.422	1	GBM.rec	SKIL	0.166	L7-pDC-Bcells
PLEKHO1	0.00957777	0.393065	0.549	0.37	1	GBM.rec	PLEKHO1	0.179	L7-pDC-Bcells
DDX6	0.00961505	0.371684	0.647	0.431	1	GBM.rec	DDX6	0.216	L7-pDC-Bcells
JCHAIN	3.89067e-09	2.06774	0.389	0.046	5.68232e-05	GBM.PD1	JCHAIN	0.343	L7-pDC-Bcells
STAT1	8.20291e-09	1.10448	0.531	0.195	0.000119804	GBM.PD1	STAT1	0.336	L7-pDC-Bcells
HLA-C	6.55807e-07	0.465732	0.937	0.839	0.00957806	GBM.PD1	HLA-C	0.098	L7-pDC-Bcells
IGHM	2.42255e-06	1.18861	0.371	0.08	0.0353813	GBM.PD1	IGHM	0.291	L7-pDC-Bcells
SKAP2	4.12376e-06	0.622724	0.463	0.195	0.0602275	GBM.PD1	SKAP2	0.268	L7-pDC-Bcells
B2M	7.10209e-06	0.325291	0.989	0.977	0.103726	GBM.PD1	B2M	0.012	L7-pDC-Bcells
HLA-E	2.11037e-05	0.36931	0.92	0.77	0.308219	GBM.PD1	HLA-E	0.15	L7-pDC-Bcells
TAP1	3.96761e-05	0.622861	0.549	0.322	0.57947	GBM.PD1	TAP1	0.227	L7-pDC-Bcells
PDIA3	4.53635e-05	0.616042	0.657	0.425	0.662534	GBM.PD1	PDIA3	0.232	L7-pDC-Bcells
PSME1	4.5472e-05	0.44013	0.754	0.506	0.664119	GBM.PD1	PSME1	0.248	L7-pDC-Bcells
PSME2	5.16414e-05	0.535603	0.657	0.448	0.754223	GBM.PD1	PSME2	0.209	L7-pDC-Bcells
SSR2	6.33713e-05	0.48713	0.72	0.46	0.925538	GBM.PD1	SSR2	0.26	L7-pDC-Bcells
LAP3	8.25434e-05	0.627943	0.549	0.31	1	GBM.PD1	LAP3	0.239	L7-pDC-Bcells
P2RY14	8.59684e-05	0.613194	0.274	0.069	1	GBM.PD1	P2RY14	0.205	L7-pDC-Bcells
CREB3L2	9.20416e-05	0.480177	0.303	0.092	1	GBM.PD1	CREB3L2	0.211	L7-pDC-Bcells
PSMB9	9.71641e-05	0.45915	0.686	0.471	1	GBM.PD1	PSMB9	0.215	L7-pDC-Bcells
GBP4	0.000180278	0.689526	0.32	0.115	1	GBM.PD1	GBP4	0.205	L7-pDC-Bcells
RNF213	0.000218407	0.508137	0.663	0.46	1	GBM.PD1	RNF213	0.203	L7-pDC-Bcells
COBLL1	0.000252916	0.510817	0.303	0.103	1	GBM.PD1	COBLL1	0.2	L7-pDC-Bcells
SPCS2	0.000259138	0.432834	0.64	0.368	1	GBM.PD1	SPCS2	0.272	L7-pDC-Bcells
ACTG1	0.000273126	0.357114	0.869	0.701	1	GBM.PD1	ACTG1	0.168	L7-pDC-Bcells
ARHGAP18	0.000288675	0.409536	0.394	0.172	1	GBM.PD1	ARHGAP18	0.222	L7-pDC-Bcells
PHPT1	0.000317193	0.523486	0.48	0.253	1	GBM.PD1	PHPT1	0.227	L7-pDC-Bcells
UBE2L6	0.000367488	0.34433	0.56	0.322	1	GBM.PD1	UBE2L6	0.238	L7-pDC-Bcells
BAX	0.000367617	0.676724	0.549	0.333	1	GBM.PD1	BAX	0.216	L7-pDC-Bcells
PARK7	0.000380213	0.379365	0.669	0.46	1	GBM.PD1	PARK7	0.209	L7-pDC-Bcells
MVP	0.000398357	0.341429	0.337	0.138	1	GBM.PD1	MVP	0.199	L7-pDC-Bcells
DCPS	0.000418511	0.452846	0.291	0.103	1	GBM.PD1	DCPS	0.188	L7-pDC-Bcells
HLA-A	0.000443558	0.371838	0.983	0.885	1	GBM.PD1	HLA-A	0.098	L7-pDC-Bcells
CCDC69	0.0005015	0.5101	0.389	0.172	1	GBM.PD1	CCDC69	0.217	L7-pDC-Bcells
RARRES3	0.000520514	0.740073	0.4	0.207	1	GBM.PD1	RARRES3	0.193	L7-pDC-Bcells
CDC123	0.000521821	0.444681	0.314	0.126	1	GBM.PD1	CDC123	0.188	L7-pDC-Bcells
PAIP1	0.000630385	0.37337	0.303	0.115	1	GBM.PD1	PAIP1	0.188	L7-pDC-Bcells
SOCS1	0.000700238	0.50024	0.44	0.253	1	GBM.PD1	SOCS1	0.187	L7-pDC-Bcells
CXCR3	0.000737894	0.526062	0.463	0.253	1	GBM.PD1	CXCR3	0.21	L7-pDC-Bcells
CERS6	0.00084414	0.472345	0.28	0.103	1	GBM.PD1	CERS6	0.177	L7-pDC-Bcells
PSMA7	0.000910885	0.358821	0.68	0.506	1	GBM.PD1	PSMA7	0.174	L7-pDC-Bcells
AP2S1	0.000915152	0.34444	0.571	0.345	1	GBM.PD1	AP2S1	0.226	L7-pDC-Bcells
ARHGAP9	0.000987469	0.378209	0.389	0.184	1	GBM.PD1	ARHGAP9	0.205	L7-pDC-Bcells
FAM49B	0.00105847	0.462404	0.6	0.391	1	GBM.PD1	FAM49B	0.209	L7-pDC-Bcells
CPNE3	0.00114242	0.43722	0.349	0.161	1	GBM.PD1	CPNE3	0.188	L7-pDC-Bcells
RHOF	0.00116454	0.369813	0.411	0.207	1	GBM.PD1	RHOF	0.204	L7-pDC-Bcells
EPSTI1	0.00120715	0.476208	0.406	0.207	1	GBM.PD1	EPSTI1	0.199	L7-pDC-Bcells
TXN	0.00126488	0.560504	0.571	0.402	1	GBM.PD1	TXN	0.169	L7-pDC-Bcells
DNAJC7	0.00128447	0.483841	0.497	0.299	1	GBM.PD1	DNAJC7	0.198	L7-pDC-Bcells
EIF5A	0.00128754	0.417495	0.594	0.402	1	GBM.PD1	EIF5A	0.192	L7-pDC-Bcells
MZB1	0.00135807	0.492898	0.371	0.184	1	GBM.PD1	MZB1	0.187	L7-pDC-Bcells
SELENOT	0.00139906	0.373715	0.48	0.276	1	GBM.PD1	SELENOT	0.204	L7-pDC-Bcells
SNX17	0.00153742	0.346238	0.429	0.241	1	GBM.PD1	SNX17	0.188	L7-pDC-Bcells
PARVB	0.00155994	0.408512	0.326	0.149	1	GBM.PD1	PARVB	0.177	L7-pDC-Bcells
SMIM14	0.00163611	0.437884	0.486	0.287	1	GBM.PD1	SMIM14	0.199	L7-pDC-Bcells
PPIB	0.00168161	0.485827	0.68	0.517	1	GBM.PD1	PPIB	0.163	L7-pDC-Bcells
SPCS1	0.00169448	0.394572	0.657	0.483	1	GBM.PD1	SPCS1	0.174	L7-pDC-Bcells
MRPL20	0.00180595	0.388557	0.497	0.31	1	GBM.PD1	MRPL20	0.187	L7-pDC-Bcells
ATRAID	0.00185485	0.352205	0.44	0.241	1	GBM.PD1	ATRAID	0.199	L7-pDC-Bcells
P4HB	0.00185866	0.457266	0.514	0.333	1	GBM.PD1	P4HB	0.181	L7-pDC-Bcells
GLIPR1	0.00187812	0.426683	0.52	0.31	1	GBM.PD1	GLIPR1	0.21	L7-pDC-Bcells
CLIC3	0.00200836	0.642069	0.383	0.207	1	GBM.PD1	CLIC3	0.176	L7-pDC-Bcells
PSMD1	0.00205767	0.421415	0.274	0.115	1	GBM.PD1	PSMD1	0.159	L7-pDC-Bcells
MRPL51	0.00210966	0.363813	0.389	0.207	1	GBM.PD1	MRPL51	0.182	L7-pDC-Bcells
SNRNP25	0.00216376	0.43386	0.354	0.172	1	GBM.PD1	SNRNP25	0.182	L7-pDC-Bcells
TRIM22	0.0022242	0.398904	0.583	0.414	1	GBM.PD1	TRIM22	0.169	L7-pDC-Bcells
WARS	0.00230591	0.503126	0.32	0.149	1	GBM.PD1	WARS	0.171	L7-pDC-Bcells
COX7A2L	0.00235059	0.428934	0.509	0.345	1	GBM.PD1	COX7A2L	0.164	L7-pDC-Bcells
GSDMD	0.00237654	0.464653	0.423	0.241	1	GBM.PD1	GSDMD	0.182	L7-pDC-Bcells
ALG5	0.00239431	0.482777	0.269	0.115	1	GBM.PD1	ALG5	0.154	L7-pDC-Bcells
CBX3	0.00252681	0.358517	0.48	0.264	1	GBM.PD1	CBX3	0.216	L7-pDC-Bcells
DEF6	0.00267273	0.43883	0.337	0.161	1	GBM.PD1	DEF6	0.176	L7-pDC-Bcells
SOD1	0.00279568	0.523386	0.571	0.402	1	GBM.PD1	SOD1	0.169	L7-pDC-Bcells
DNAJB9	0.00285596	0.36757	0.36	0.184	1	GBM.PD1	DNAJB9	0.176	L7-pDC-Bcells
NDUFB7	0.00285669	0.48769	0.497	0.31	1	GBM.PD1	NDUFB7	0.187	L7-pDC-Bcells
ARL6IP4	0.00293356	0.393554	0.634	0.425	1	GBM.PD1	ARL6IP4	0.209	L7-pDC-Bcells
IKBKB	0.00302751	0.41047	0.314	0.138	1	GBM.PD1	IKBKB	0.176	L7-pDC-Bcells
TAF7	0.00311343	0.327938	0.526	0.333	1	GBM.PD1	TAF7	0.193	L7-pDC-Bcells
IRF1	0.00311395	0.636824	0.503	0.345	1	GBM.PD1	IRF1	0.158	L7-pDC-Bcells
EIF2S2	0.00317112	0.414862	0.531	0.356	1	GBM.PD1	EIF2S2	0.175	L7-pDC-Bcells
SEC61B	0.00321418	0.536402	0.697	0.563	1	GBM.PD1	SEC61B	0.134	L7-pDC-Bcells
LILRB4	0.00334438	0.36448	0.417	0.218	1	GBM.PD1	LILRB4	0.199	L7-pDC-Bcells
COX17	0.00335427	0.509405	0.486	0.287	1	GBM.PD1	COX17	0.199	L7-pDC-Bcells
MRE11	0.00357287	0.422627	0.251	0.103	1	GBM.PD1	MRE11	0.148	L7-pDC-Bcells
SNRPB2	0.00371646	0.3771	0.486	0.299	1	GBM.PD1	SNRPB2	0.187	L7-pDC-Bcells
UGCG	0.00378766	0.481285	0.434	0.276	1	GBM.PD1	UGCG	0.158	L7-pDC-Bcells
DGKZ	0.00394416	0.361739	0.337	0.161	1	GBM.PD1	DGKZ	0.176	L7-pDC-Bcells
PRDX6	0.00395622	0.387936	0.537	0.356	1	GBM.PD1	PRDX6	0.181	L7-pDC-Bcells
SMPD3	0.0040986	0.505095	0.286	0.126	1	GBM.PD1	SMPD3	0.16	L7-pDC-Bcells
COPE	0.00415894	0.45038	0.606	0.425	1	GBM.PD1	COPE	0.181	L7-pDC-Bcells
COPZ1	0.004319	0.329195	0.349	0.184	1	GBM.PD1	COPZ1	0.165	L7-pDC-Bcells
SNX5	0.00457509	0.352551	0.423	0.241	1	GBM.PD1	SNX5	0.182	L7-pDC-Bcells
RBX1	0.00468137	0.436197	0.554	0.356	1	GBM.PD1	RBX1	0.198	L7-pDC-Bcells
SELPLG	0.00485192	0.425118	0.366	0.207	1	GBM.PD1	SELPLG	0.159	L7-pDC-Bcells
HMGA1	0.00497107	0.404809	0.389	0.207	1	GBM.PD1	HMGA1	0.182	L7-pDC-Bcells
TWF2	0.00499011	0.414086	0.411	0.276	1	GBM.PD1	TWF2	0.135	L7-pDC-Bcells
PPP1R14A	0.00499067	0.388317	0.314	0.149	1	GBM.PD1	PPP1R14A	0.165	L7-pDC-Bcells
LAMTOR5	0.00501185	0.439495	0.577	0.414	1	GBM.PD1	LAMTOR5	0.163	L7-pDC-Bcells
CANX	0.00523213	0.471769	0.469	0.322	1	GBM.PD1	CANX	0.147	L7-pDC-Bcells
TAF9	0.00524535	0.363518	0.257	0.115	1	GBM.PD1	TAF9	0.142	L7-pDC-Bcells
DCK	0.00525001	0.465788	0.417	0.253	1	GBM.PD1	DCK	0.164	L7-pDC-Bcells
ERAP2	0.00533097	0.414994	0.343	0.172	1	GBM.PD1	ERAP2	0.171	L7-pDC-Bcells
SNX3	0.00573181	0.33888	0.64	0.483	1	GBM.PD1	SNX3	0.157	L7-pDC-Bcells
LMAN2	0.00585711	0.322839	0.497	0.299	1	GBM.PD1	LMAN2	0.198	L7-pDC-Bcells
LILRA4	0.00609377	0.468049	0.326	0.161	1	GBM.PD1	LILRA4	0.165	L7-pDC-Bcells
LCP1	0.00620549	0.403426	0.674	0.552	1	GBM.PD1	LCP1	0.122	L7-pDC-Bcells
IMMT	0.00623361	0.441217	0.297	0.149	1	GBM.PD1	IMMT	0.148	L7-pDC-Bcells
LAMTOR1	0.00630506	0.421903	0.531	0.333	1	GBM.PD1	LAMTOR1	0.198	L7-pDC-Bcells
GSTK1	0.00633977	0.36747	0.594	0.402	1	GBM.PD1	GSTK1	0.192	L7-pDC-Bcells
TRPC4AP	0.00650514	0.410325	0.251	0.103	1	GBM.PD1	TRPC4AP	0.148	L7-pDC-Bcells
NUCB1	0.00679316	0.339704	0.417	0.253	1	GBM.PD1	NUCB1	0.164	L7-pDC-Bcells
NUCB2	0.00707388	0.489535	0.371	0.218	1	GBM.PD1	NUCB2	0.153	L7-pDC-Bcells
PPP1R14B	0.00712233	0.657935	0.469	0.322	1	GBM.PD1	PPP1R14B	0.147	L7-pDC-Bcells
CSDE1	0.00715328	0.42641	0.606	0.437	1	GBM.PD1	CSDE1	0.169	L7-pDC-Bcells
GSTP1	0.0073073	0.361041	0.583	0.402	1	GBM.PD1	GSTP1	0.181	L7-pDC-Bcells
YWHAB	0.0073578	0.45102	0.731	0.575	1	GBM.PD1	YWHAB	0.156	L7-pDC-Bcells
CSK	0.00760482	0.369497	0.389	0.23	1	GBM.PD1	CSK	0.159	L7-pDC-Bcells
DAD1	0.00761534	0.336122	0.56	0.379	1	GBM.PD1	DAD1	0.181	L7-pDC-Bcells
PARP9	0.00762188	0.388409	0.286	0.138	1	GBM.PD1	PARP9	0.148	L7-pDC-Bcells
SOX4	0.00780674	0.935274	0.343	0.195	1	GBM.PD1	SOX4	0.148	L7-pDC-Bcells
PGLS	0.00794485	0.418194	0.474	0.31	1	GBM.PD1	PGLS	0.164	L7-pDC-Bcells
CHST12	0.00798746	0.435346	0.331	0.172	1	GBM.PD1	CHST12	0.159	L7-pDC-Bcells
PSMD3	0.0080015	0.357376	0.32	0.172	1	GBM.PD1	PSMD3	0.148	L7-pDC-Bcells
PTGDS	0.0080872	1.20962	0.28	0.138	1	GBM.PD1	PTGDS	0.142	L7-pDC-Bcells
PSMA3	0.00827837	0.441564	0.486	0.333	1	GBM.PD1	PSMA3	0.153	L7-pDC-Bcells
GZMB	0.00832877	0.437933	0.417	0.253	1	GBM.PD1	GZMB	0.164	L7-pDC-Bcells
COX14	0.00864745	0.441338	0.463	0.31	1	GBM.PD1	COX14	0.153	L7-pDC-Bcells
MRPS12	0.00894958	0.370592	0.349	0.207	1	GBM.PD1	MRPS12	0.142	L7-pDC-Bcells
POLR2G	0.00920129	0.366898	0.394	0.241	1	GBM.PD1	POLR2G	0.153	L7-pDC-Bcells
CALM3	0.00965459	0.459687	0.4	0.253	1	GBM.PD1	CALM3	0.147	L7-pDC-Bcells
PCNX1	0.00988543	0.443916	0.286	0.149	1	GBM.PD1	PCNX1	0.137	L7-pDC-Bcells
ANXA6	0.00991374	0.338311	0.406	0.241	1	GBM.PD1	ANXA6	0.165	L7-pDC-Bcells
SPP1	5.30989e-18	1.07307	0.755	0.473	7.75509e-14	GBM.new	SPP1	0.282	Dying
APOC1	7.8814e-11	1.01731	0.475	0.251	1.15108e-06	GBM.new	APOC1	0.224	Dying
CCL3	6.11552e-08	1.04139	0.388	0.202	0.000893172	GBM.new	CCL3	0.186	Dying
MALAT1	2.42426e-07	0.397816	1	0.998	0.00354064	GBM.new	MALAT1	0.002	Dying
FTH1	1.33675e-06	0.477575	0.892	0.804	0.0195232	GBM.new	FTH1	0.088	Dying
NPC2	3.01785e-05	0.541547	0.388	0.243	0.440758	GBM.new	NPC2	0.145	Dying
TMSB4X	3.14253e-05	0.54164	0.95	0.913	0.458967	GBM.new	TMSB4X	0.037	Dying
XIST	4.65021e-05	0.83644	0.281	0.154	0.679164	GBM.new	XIST	0.127	Dying
TYROBP	8.38259e-05	0.726762	0.381	0.265	1	GBM.new	TYROBP	0.116	Dying
HSP90AA1	0.000859206	0.597518	0.82	0.799	1	GBM.new	HSP90AA1	0.021	Dying
DNAJB6	0.00275324	0.555038	0.453	0.376	1	GBM.new	DNAJB6	0.077	Dying
C1QB	0.00851475	0.345244	0.475	0.384	1	GBM.new	C1QB	0.091	Dying
ACTB	1.48346e-06	0.4967	0.792	0.77	0.0216659	GBM.rec	ACTB	0.022	Dying
CD74	7.13084e-05	0.545808	0.71	0.714	1	GBM.rec	CD74	-0.004	Dying
UBC	0.00652578	0.437654	0.71	0.725	1	GBM.rec	UBC	-0.015	Dying
EEF1A1	0.00792795	0.393522	0.824	0.848	1	GBM.rec	EEF1A1	-0.024	Dying
STAT1	2.96664e-24	0.864354	0.44	0.133	4.33278e-20	GBM.PD1	STAT1	0.307	Dying
MIAT	4.95379e-22	1.08811	0.374	0.096	7.23501e-18	GBM.PD1	MIAT	0.278	Dying
GBP1	8.59462e-21	0.819606	0.331	0.076	1.25524e-16	GBM.PD1	GBP1	0.255	Dying
ARAP2	8.33093e-19	0.619264	0.472	0.185	1.21673e-14	GBM.PD1	ARAP2	0.287	Dying
KMT2A	1.68931e-18	0.543276	0.443	0.164	2.46724e-14	GBM.PD1	KMT2A	0.279	Dying
GBP2	6.07433e-18	0.578196	0.354	0.102	8.87156e-14	GBM.PD1	GBP2	0.252	Dying
ETS1	3.10497e-16	0.427708	0.608	0.312	4.53481e-12	GBM.PD1	ETS1	0.296	Dying
SYNE2	4.50751e-16	0.700155	0.632	0.38	6.58322e-12	GBM.PD1	SYNE2	0.252	Dying
PARP14	1.55121e-15	0.630254	0.461	0.208	2.26555e-11	GBM.PD1	PARP14	0.253	Dying
CD84	1.79425e-15	0.579546	0.343	0.115	2.62051e-11	GBM.PD1	CD84	0.228	Dying
CFLAR	1.2046e-14	0.439513	0.533	0.271	1.75932e-10	GBM.PD1	CFLAR	0.262	Dying
GPR171	2.60544e-14	0.54514	0.301	0.091	3.80525e-10	GBM.PD1	GPR171	0.21	Dying
NIN	2.61954e-14	0.428696	0.32	0.107	3.82584e-10	GBM.PD1	NIN	0.213	Dying
KIAA1551	3.76438e-14	0.534546	0.568	0.318	5.49787e-10	GBM.PD1	KIAA1551	0.25	Dying
VPS13C	4.14053e-14	0.41655	0.452	0.198	6.04724e-10	GBM.PD1	VPS13C	0.254	Dying
CCSER2	5.85408e-14	0.515667	0.391	0.164	8.54989e-10	GBM.PD1	CCSER2	0.227	Dying
XAF1	1.07912e-13	0.578737	0.295	0.094	1.57605e-09	GBM.PD1	XAF1	0.201	Dying
GBP4	1.11525e-13	0.548535	0.266	0.076	1.62882e-09	GBM.PD1	GBP4	0.19	Dying
GBP5	1.25572e-13	0.545598	0.4	0.172	1.83397e-09	GBM.PD1	GBP5	0.228	Dying
ITPR2	2.85111e-13	0.657925	0.305	0.107	4.16405e-09	GBM.PD1	ITPR2	0.198	Dying
SFXN1	3.90338e-13	0.512134	0.267	0.078	5.70088e-09	GBM.PD1	SFXN1	0.189	Dying
UBE3A	4.43062e-13	0.586503	0.274	0.086	6.47093e-09	GBM.PD1	UBE3A	0.188	Dying
GCC2	4.60994e-13	0.448478	0.468	0.224	6.73282e-09	GBM.PD1	GCC2	0.244	Dying
PDE3B	5.31045e-13	0.530928	0.355	0.135	7.75591e-09	GBM.PD1	PDE3B	0.22	Dying
TSPAN14	6.49215e-13	0.413175	0.326	0.122	9.48179e-09	GBM.PD1	TSPAN14	0.204	Dying
DIP2A	6.88548e-13	0.500718	0.354	0.141	1.00562e-08	GBM.PD1	DIP2A	0.213	Dying
TRIM22	1.38627e-12	0.406662	0.452	0.208	2.02465e-08	GBM.PD1	TRIM22	0.244	Dying
LUC7L3	1.48889e-12	0.403159	0.527	0.284	2.17452e-08	GBM.PD1	LUC7L3	0.243	Dying
IKZF1	1.71454e-12	0.426739	0.621	0.372	2.50408e-08	GBM.PD1	IKZF1	0.249	Dying
PPP2R5C	2.00268e-12	0.40299	0.618	0.354	2.92491e-08	GBM.PD1	PPP2R5C	0.264	Dying
BOD1L1	2.19285e-12	0.380279	0.372	0.154	3.20265e-08	GBM.PD1	BOD1L1	0.218	Dying
SCAF11	2.21921e-12	0.395753	0.497	0.247	3.24116e-08	GBM.PD1	SCAF11	0.25	Dying
ANKRD12	2.88883e-12	0.367433	0.616	0.362	4.21914e-08	GBM.PD1	ANKRD12	0.254	Dying
SLFN5	3.85531e-12	0.409244	0.386	0.169	5.63068e-08	GBM.PD1	SLFN5	0.217	Dying
N4BP2L2	4.72802e-12	0.342841	0.622	0.37	6.90527e-08	GBM.PD1	N4BP2L2	0.252	Dying
LYST	6.61899e-12	0.423268	0.348	0.143	9.66703e-08	GBM.PD1	LYST	0.205	Dying
SAMD9	7.58269e-12	0.479373	0.271	0.091	1.10745e-07	GBM.PD1	SAMD9	0.18	Dying
BTN3A2	8.56348e-12	0.422085	0.371	0.161	1.2507e-07	GBM.PD1	BTN3A2	0.21	Dying
ZNF638	9.35264e-12	0.365809	0.335	0.133	1.36595e-07	GBM.PD1	ZNF638	0.202	Dying
ERAP2	9.50621e-12	0.575433	0.324	0.135	1.38838e-07	GBM.PD1	ERAP2	0.189	Dying
FKBP5	1.29894e-11	0.379766	0.533	0.305	1.8971e-07	GBM.PD1	FKBP5	0.228	Dying
ZNF292	1.3181e-11	0.371239	0.403	0.185	1.92508e-07	GBM.PD1	ZNF292	0.218	Dying
DDX17	1.52005e-11	0.363586	0.63	0.385	2.22004e-07	GBM.PD1	DDX17	0.245	Dying
CLEC2D	1.63945e-11	0.334977	0.487	0.245	2.39441e-07	GBM.PD1	CLEC2D	0.242	Dying
EPB41	1.64134e-11	0.454543	0.346	0.143	2.39717e-07	GBM.PD1	EPB41	0.203	Dying
BIRC3	1.94454e-11	0.364095	0.343	0.138	2.84e-07	GBM.PD1	BIRC3	0.205	Dying
RNF213	3.29059e-11	0.392238	0.715	0.492	4.8059e-07	GBM.PD1	RNF213	0.223	Dying
PTPRC	3.50617e-11	0.3661	0.759	0.534	5.12076e-07	GBM.PD1	PTPRC	0.225	Dying
UHRF2	4.4047e-11	0.465717	0.263	0.091	6.43306e-07	GBM.PD1	UHRF2	0.172	Dying
SLC38A2	5.88597e-11	0.348929	0.388	0.177	8.59647e-07	GBM.PD1	SLC38A2	0.211	Dying
PYHIN1	5.94197e-11	0.487927	0.364	0.167	8.67824e-07	GBM.PD1	PYHIN1	0.197	Dying
KLF13	6.17199e-11	0.385138	0.316	0.13	9.0142e-07	GBM.PD1	KLF13	0.186	Dying
FAM107B	6.69929e-11	0.373104	0.356	0.156	9.78431e-07	GBM.PD1	FAM107B	0.2	Dying
CLIP1	7.93108e-11	0.378475	0.279	0.104	1.15833e-06	GBM.PD1	CLIP1	0.175	Dying
SP110	8.92865e-11	0.394317	0.326	0.135	1.30403e-06	GBM.PD1	SP110	0.191	Dying
ZRANB2	1.06265e-10	0.458474	0.339	0.148	1.552e-06	GBM.PD1	ZRANB2	0.191	Dying
SETD2	1.08702e-10	0.343517	0.334	0.143	1.58759e-06	GBM.PD1	SETD2	0.191	Dying
CYLD	1.32979e-10	0.407816	0.379	0.174	1.94216e-06	GBM.PD1	CYLD	0.205	Dying
SMC4	1.69061e-10	0.424883	0.29	0.112	2.46914e-06	GBM.PD1	SMC4	0.178	Dying
SLC38A1	2.9701e-10	0.381157	0.44	0.232	4.33783e-06	GBM.PD1	SLC38A1	0.208	Dying
CELF1	4.42109e-10	0.51273	0.316	0.138	6.457e-06	GBM.PD1	CELF1	0.178	Dying
PCNX1	5.99327e-10	0.538471	0.327	0.148	8.75317e-06	GBM.PD1	PCNX1	0.179	Dying
LNPEP	6.00037e-10	0.443417	0.307	0.13	8.76353e-06	GBM.PD1	LNPEP	0.177	Dying
ANKRD36	7.4458e-10	0.385326	0.293	0.12	1.08746e-05	GBM.PD1	ANKRD36	0.173	Dying
TBC1D2B	7.69916e-10	0.335407	0.269	0.102	1.12446e-05	GBM.PD1	TBC1D2B	0.167	Dying
UTRN	7.7414e-10	0.496443	0.457	0.255	1.13063e-05	GBM.PD1	UTRN	0.202	Dying
ANKRD44	8.51808e-10	0.328028	0.448	0.232	1.24407e-05	GBM.PD1	ANKRD44	0.216	Dying
CNTRL	8.7603e-10	0.502007	0.265	0.104	1.27944e-05	GBM.PD1	CNTRL	0.161	Dying
PAPOLA	2.43464e-09	0.323286	0.34	0.159	3.5558e-05	GBM.PD1	PAPOLA	0.181	Dying
RIPOR2	4.99792e-09	0.355243	0.322	0.151	7.29946e-05	GBM.PD1	RIPOR2	0.171	Dying
DDX3Y	5.71028e-09	0.37171	0.263	0.107	8.33986e-05	GBM.PD1	DDX3Y	0.156	Dying
CD2	8.00263e-09	0.325268	0.547	0.336	0.000116878	GBM.PD1	CD2	0.211	Dying
GOLGA8A	1.24946e-08	0.532509	0.258	0.109	0.000182483	GBM.PD1	GOLGA8A	0.149	Dying
KLRD1	1.36817e-08	0.552109	0.282	0.125	0.000199821	GBM.PD1	KLRD1	0.157	Dying
DDHD1	2.25631e-08	0.329652	0.266	0.115	0.000329534	GBM.PD1	DDHD1	0.151	Dying
PRMT2	2.38687e-08	0.346808	0.379	0.201	0.000348603	GBM.PD1	PRMT2	0.178	Dying
ASCC3	3.95002e-08	0.364419	0.269	0.122	0.000576901	GBM.PD1	ASCC3	0.147	Dying
MALT1	4.37276e-08	0.386443	0.278	0.13	0.000638642	GBM.PD1	MALT1	0.148	Dying
RBM5	4.51254e-08	0.322919	0.335	0.167	0.000659057	GBM.PD1	RBM5	0.168	Dying
PRKCB	4.77172e-08	0.341671	0.265	0.117	0.000696909	GBM.PD1	PRKCB	0.148	Dying
THOC2	8.48306e-08	0.323655	0.273	0.122	0.00123895	GBM.PD1	THOC2	0.151	Dying
SREK1	8.78821e-08	0.411115	0.273	0.128	0.00128352	GBM.PD1	SREK1	0.145	Dying
MDM4	1.5145e-07	0.35387	0.351	0.19	0.00221193	GBM.PD1	MDM4	0.161	Dying
RORA	2.12982e-07	0.327745	0.352	0.193	0.0031106	GBM.PD1	RORA	0.159	Dying
TTC3	3.03284e-07	0.322229	0.29	0.143	0.00442946	GBM.PD1	TTC3	0.147	Dying
PRF1	3.81586e-07	0.323579	0.275	0.133	0.00557307	GBM.PD1	PRF1	0.142	Dying
IL6ST	9.82452e-07	0.367077	0.285	0.146	0.0143487	GBM.PD1	IL6ST	0.139	Dying
TMEM259	4.30055e-06	0.322319	0.275	0.148	0.0628095	GBM.PD1	TMEM259	0.127	Dying

## Sheet: MonocleFraction
CD4 T cells
	Fate	0	1	2	3	4	Total			Fate	0	1	2	3	4
Count	GBM.new	21	37	6	3	19	92			Fraction	0.228261	0.402174	0.0652174	0.0326087	0.206522
	GBM.rec	19	14	9	3	11	62				0.306452	0.225806	0.145161	0.0483871	0.177419
	GBM.PD1	104	61	11	37	42	273				0.380952	0.223443	0.040293	0.135531	0.153846
CD8 T cells
	Fate	0	1	2	3	4	5	Total		Fate	0	1	2	3	4	5
Count	GBM.new	30	24	18	49	2	71	224		Fraction	0.133929	0.107143	0.0803571	0.21875	0.00892857	0.316964
	GBM.rec	27	26	24	38	27	72	224			0.120536	0.116071	0.107143	0.169643	0.120536	0.321429
	GBM.PD1	46	17	42	21	38	40	224			0.205357	0.0758929	0.1875	0.09375	0.169643	0.178571
DN T cells
	Fate	0	1	2	3	4	5	Total		Fate	0	1	2	3	4	5
Count	GBM.new	42	17	5	6	49	62	186		Fraction	0.225806	0.0913978	0.0268817	0.0322581	0.263441	0.333333
	GBM.rec	58	17	20	10	35	40	186			0.311828	0.0913978	0.107527	0.0537634	0.188172	0.215054
	GBM.PD1	43	31	8	11	26	60	186			0.231183	0.166667	0.0430108	0.0591398	0.139785	0.322581
