# Supplementary material for: Neoadjuvant PD-1 blockade induces T cell and cDC1 activation but fails to overcome the immunosuppressive tumor associated macrophages in recurrent glioblastoma
Source: Research Square preprint supplement (doi:10.21203/rs.3.rs-793187/v1), 2021-08-13
Supplement: Supplementary file 4 [file SuppTable4-scRNAseq-Lymphoid-PBMC.xlsx]

## Sheet: Markers
Gene	p_val	avg_logFC	pct.1	pct.2	p_val_adj	cluster	gene
IGHA1	0	5.73943	0.804	0.077	0	B cell	IGHA1
JCHAIN	0	4.76223	0.846	0.028	0	B cell	JCHAIN
IGHG1	0	4.03439	0.299	0.006	0	B cell	IGHG1
IGHG3	0	3.77766	0.278	0.006	0	B cell	IGHG3
MZB1	0	3.53621	0.873	0.014	0	B cell	MZB1
IGHA2	0	2.48522	0.565	0.004	0	B cell	IGHA2
ITM2C	0	2.36874	0.816	0.049	0	B cell	ITM2C
CD79A	0	2.21995	0.792	0.022	0	B cell	CD79A
TNFRSF17	0	2.07074	0.665	0.002	0	B cell	TNFRSF17
DERL3	0	2.05753	0.746	0.003	0	B cell	DERL3
EAF2	0	1.31573	0.601	0.025	0	B cell	EAF2
MEF2C	0	1.28155	0.686	0.022	0	B cell	MEF2C
GNG7	0	1.14846	0.601	0.008	0	B cell	GNG7
FAM30A	0	1.10938	0.32	0.004	0	B cell	FAM30A
CTSH	0	1.06406	0.601	0.067	0	B cell	CTSH
TXNDC5	0	0.97439	0.402	0.003	0	B cell	TXNDC5
TNFRSF13B	0	0.964309	0.529	0.002	0	B cell	TNFRSF13B
POU2AF1	0	0.942392	0.523	0.005	0	B cell	POU2AF1
SEMA4A	0	0.883055	0.517	0.01	0	B cell	SEMA4A
IRF4	0	0.824904	0.405	0.019	0	B cell	IRF4
RNASE6	0	0.790438	0.486	0.016	0	B cell	RNASE6
TCF4	0	0.776813	0.474	0.014	0	B cell	TCF4
ELL2	0	0.727256	0.441	0.031	0	B cell	ELL2
COBLL1	0	0.725927	0.411	0.001	0	B cell	COBLL1
METTL7A	0	0.710632	0.498	0.039	0	B cell	METTL7A
HRASLS2	0	0.67614	0.405	0.011	0	B cell	HRASLS2
CKAP4	0	0.675776	0.387	0.019	0	B cell	CKAP4
CPNE5	0	0.637979	0.387	0.004	0	B cell	CPNE5
BTK	0	0.588801	0.39	0.006	0	B cell	BTK
P2RX5	0	0.569841	0.423	0.023	0	B cell	P2RX5
CHPF	0	0.54196	0.414	0.023	0	B cell	CHPF
FCRL5	0	0.530088	0.299	0.001	0	B cell	FCRL5
BLNK	0	0.523443	0.366	0.002	0	B cell	BLNK
ABCB9	0	0.503365	0.287	0.007	0	B cell	ABCB9
ENTPD1	0	0.497	0.429	0.021	0	B cell	ENTPD1
RASGRP3	0	0.495545	0.338	0.009	0	B cell	RASGRP3
BASP1	0	0.484258	0.311	0.006	0	B cell	BASP1
BLK	0	0.4782	0.326	0.007	0	B cell	BLK
FCGR2B	0	0.460594	0.36	0.011	0	B cell	FCGR2B
TRIB1	0	0.453481	0.278	0.006	0	B cell	TRIB1
LILRB4	0	0.450798	0.275	0.004	0	B cell	LILRB4
GGH1	0	0.437837	0.278	0.012	0	B cell	GGH
MYBL21	0	0.425581	0.275	0.005	0	B cell	MYBL2
NT5DC2	0	0.393291	0.257	0.004	0	B cell	NT5DC2
CLIC4	0	0.392304	0.287	0.004	0	B cell	CLIC4
PDIA5	0	0.38861	0.299	0.009	0	B cell	PDIA5
FGD2	0	0.381659	0.257	0.01	0	B cell	FGD2
RBM47	0	0.37538	0.269	0.006	0	B cell	RBM47
CAV1	0	0.355042	0.251	0.002	0	B cell	CAV1
PNOC	0	0.351956	0.281	0.001	0	B cell	PNOC
PLPP5	7.56563e-306	0.773572	0.592	0.063	1.01145e-301	B cell	PLPP5
SPATS2	2.96149e-301	0.651539	0.48	0.043	3.95921e-297	B cell	SPATS2
CLECL1	1.45468e-281	0.332253	0.287	0.017	1.94476e-277	B cell	CLECL1
TXNDC11	9.36711e-266	1.01514	0.628	0.084	1.25229e-261	B cell	TXNDC11
AIM2	5.63379e-265	0.356354	0.29	0.018	7.53182e-261	B cell	AIM2
IGLC3	9.13801e-256	5.3199	0.387	0.035	1.22166e-251	B cell	IGLC3
ST6GALNAC4	1.47106e-250	0.544975	0.42	0.039	1.96666e-246	B cell	ST6GALNAC4
IGLC2	2.26215e-245	5.85976	0.571	0.08	3.02427e-241	B cell	IGLC2
GMPPB	9.78927e-244	0.651787	0.495	0.055	1.30873e-239	B cell	GMPPB
MANEA	4.01923e-240	0.474619	0.378	0.033	5.3733e-236	B cell	MANEA
SLC44A1	8.57485e-239	0.557681	0.447	0.046	1.14637e-234	B cell	SLC44A1
UBE2J1	1.88682e-232	1.45759	0.719	0.144	2.52248e-228	B cell	UBE2J1
C16orf74	6.56689e-218	0.457147	0.323	0.027	8.77928e-214	B cell	C16orf74
WARS	1.50112e-214	0.86599	0.502	0.064	2.00685e-210	B cell	WARS
ARID3A	6.47536e-213	0.478611	0.353	0.033	8.65691e-209	B cell	ARID3A
CD383	5.67615e-212	1.23977	0.662	0.116	7.58845e-208	B cell	CD38
PRDX4	6.69376e-204	1.10761	0.634	0.111	8.94888e-200	B cell	PRDX4
IGKC1	2.41327e-187	5.7145	0.686	0.156	3.2263e-183	B cell	IGKC
PDIA4	6.2029e-179	1.5344	0.755	0.204	8.29265e-175	B cell	PDIA4
SEL1L3	4.29479e-177	0.821425	0.532	0.084	5.74171e-173	B cell	SEL1L3
IFI27L11	4.34493e-176	0.334788	0.341	0.036	5.80873e-172	B cell	IFI27L1
SIL1	2.3867e-175	0.429191	0.456	0.061	3.19078e-171	B cell	SIL1
NCF1	2.13379e-174	0.878526	0.659	0.127	2.85267e-170	B cell	NCF1
IGHM	7.5033e-172	4.70551	0.317	0.034	1.00312e-167	B cell	IGHM
NANS	1.83394e-170	0.527792	0.48	0.069	2.4518e-166	B cell	NANS
HLA-DQA1	9.7766e-170	0.552589	0.411	0.052	1.30703e-165	B cell	HLA-DQA1
SEC11C	8.21077e-163	1.8078	0.852	0.335	1.0977e-158	B cell	SEC11C
TENT5C	2.76327e-161	0.712452	0.541	0.09	3.69422e-157	B cell	TENT5C
OAS1	2.27471e-157	0.419168	0.405	0.054	3.04106e-153	B cell	OAS1
SRPRB	7.42121e-155	0.60637	0.55	0.094	9.92141e-151	B cell	SRPRB
PDLIM1	1.28669e-149	0.614128	0.453	0.07	1.72018e-145	B cell	PDLIM1
TP53INP1	6.13693e-144	0.678915	0.435	0.067	8.20447e-140	B cell	TP53INP1
STT3A	6.79358e-143	0.47379	0.444	0.068	9.08234e-139	B cell	STT3A
CD79B	2.14334e-136	0.629778	0.583	0.115	2.86543e-132	B cell	CD79B
PERP	8.76621e-134	0.439248	0.293	0.035	1.17195e-129	B cell	PERP
SSR3	1.22172e-133	1.38584	0.785	0.293	1.63332e-129	B cell	SSR3
MYDGF	1.99384e-133	1.48647	0.813	0.319	2.66556e-129	B cell	MYDGF
HSP90B1	7.13198e-131	2.10287	0.9	0.604	9.53474e-127	B cell	HSP90B1
PPIB	7.81105e-131	1.71544	0.931	0.699	1.04426e-126	B cell	PPIB
CCDC50	4.62128e-130	0.424344	0.369	0.053	6.17819e-126	B cell	CCDC50
EDEM1	1.82044e-129	0.570575	0.508	0.094	2.43375e-125	B cell	EDEM1
ADAM19	1.30578e-127	0.371472	0.384	0.058	1.7457e-123	B cell	ADAM19
TPD52	3.28928e-122	0.53869	0.52	0.101	4.39744e-118	B cell	TPD52
SLC38A5	6.87382e-120	0.418819	0.296	0.038	9.18961e-116	B cell	SLC38A5
LMAN1	4.02291e-119	1.14765	0.752	0.259	5.37823e-115	B cell	LMAN1
ISOC2	5.61075e-118	0.47092	0.453	0.081	7.50102e-114	B cell	ISOC2
SDF2L11	7.37785e-117	1.17999	0.792	0.286	9.86345e-113	B cell	SDF2L1
AHCY	4.75359e-116	0.329407	0.341	0.05	6.35507e-112	B cell	AHCY
CYBB	5.55132e-116	0.355556	0.269	0.033	7.42156e-112	B cell	CYBB
DCPS	1.0586e-114	0.60298	0.523	0.107	1.41524e-110	B cell	DCPS
CRELD2	1.8621e-113	0.802024	0.686	0.182	2.48944e-109	B cell	CRELD2
CD59	4.33987e-113	0.331035	0.405	0.068	5.80197e-109	B cell	CD59
TOR3A	4.3567e-113	0.414244	0.483	0.093	5.82447e-109	B cell	TOR3A
HM13	7.87103e-113	0.905339	0.734	0.222	1.05228e-108	B cell	HM13
CCDC32	1.95603e-112	0.606847	0.511	0.105	2.61501e-108	B cell	CCDC32
B4GALT3	3.61283e-112	0.467896	0.532	0.108	4.82999e-108	B cell	B4GALT3
DNAJB111	4.7572e-110	0.672387	0.583	0.138	6.3599e-106	B cell	DNAJB11
EDEM2	6.6251e-110	0.331195	0.459	0.085	8.8571e-106	B cell	EDEM2
RALGPS2	6.71128e-109	0.455475	0.296	0.042	8.97231e-105	B cell	RALGPS2
SLC35B1	1.01254e-108	0.503441	0.514	0.106	1.35366e-104	B cell	SLC35B1
LRRC591	1.85257e-108	0.528755	0.498	0.102	2.4767e-104	B cell	LRRC59
FKBP111	4.78829e-107	1.11766	0.813	0.336	6.40146e-103	B cell	FKBP11
SEC61A1	1.49567e-106	0.57236	0.613	0.146	1.99956e-102	B cell	SEC61A1
MAN1A1	1.94739e-106	0.749286	0.538	0.124	2.60346e-102	B cell	MAN1A1
PDIA61	2.01981e-106	1.21064	0.849	0.416	2.70029e-102	B cell	PDIA6
HLA-DMA1	2.7111e-106	0.51005	0.471	0.094	3.62447e-102	B cell	HLA-DMA
AQP32	1.11659e-105	0.806548	0.674	0.187	1.49277e-101	B cell	AQP3
ZNF593	2.53254e-105	0.332544	0.453	0.086	3.38575e-101	B cell	ZNF593
PREB	4.90003e-105	0.423642	0.456	0.088	6.55085e-101	B cell	PREB
CHID1	1.19155e-104	0.359524	0.441	0.083	1.59298e-100	B cell	CHID1
SEC24D	6.67946e-103	0.375771	0.326	0.051	8.92977e-99	B cell	SEC24D
TXNDC15	8.16173e-103	0.498348	0.526	0.116	1.09114e-98	B cell	TXNDC15
HYOU1	1.62329e-98	0.486625	0.441	0.089	2.17017e-94	B cell	HYOU1
MANF	3.36821e-98	1.14387	0.728	0.264	4.50296e-94	B cell	MANF
SELENOS	3.18356e-97	0.906729	0.713	0.245	4.25611e-93	B cell	SELENOS
LARP1B	1.40121e-96	0.35992	0.335	0.056	1.87327e-92	B cell	LARP1B
RHOQ	8.41071e-96	0.593771	0.375	0.071	1.12443e-91	B cell	RHOQ
CALU	2.3904e-95	0.376163	0.438	0.088	3.19572e-91	B cell	CALU
SCPEP1	5.38395e-94	0.348021	0.399	0.075	7.19781e-90	B cell	SCPEP1
TMEM156	7.33307e-94	0.488064	0.492	0.11	9.80358e-90	B cell	TMEM156
BAK1	3.1039e-92	0.327627	0.429	0.086	4.1496e-88	B cell	BAK1
SCARB2	1.00049e-91	0.390593	0.366	0.067	1.33755e-87	B cell	SCARB2
SSR4	5.66298e-91	1.09714	0.9	0.723	7.57084e-87	B cell	SSR4
FKBP2	5.12747e-90	0.979244	0.773	0.301	6.85491e-86	B cell	FKBP2
GRN1	4.38075e-88	0.4173	0.471	0.104	5.85662e-84	B cell	GRN
RRBP11	2.54276e-86	0.876055	0.637	0.193	3.39941e-82	B cell	RRBP1
RPN1	8.8379e-86	0.664352	0.665	0.199	1.18154e-81	B cell	RPN1
HIBCH	1.47551e-84	0.346977	0.45	0.1	1.9726e-80	B cell	HIBCH
KDELR2	3.91813e-83	0.867761	0.695	0.249	5.23815e-79	B cell	KDELR2
CASP3	1.12247e-82	0.427061	0.471	0.109	1.50063e-78	B cell	CASP3
ZBP1	2.90362e-82	0.532792	0.538	0.139	3.88185e-78	B cell	ZBP1
SUB12	4.46053e-80	1.24479	0.903	0.764	5.96329e-76	B cell	SUB1
SPCS2	1.17762e-77	0.920377	0.834	0.528	1.57437e-73	B cell	SPCS2
HDLBP	1.76372e-77	0.573372	0.577	0.162	2.35791e-73	B cell	HDLBP
NME11	4.52491e-76	0.54434	0.444	0.11	6.04935e-72	B cell	NME1
MEI1	6.06427e-76	0.335659	0.486	0.118	8.10732e-72	B cell	MEI1
CTSZ	6.31557e-76	0.331154	0.423	0.096	8.44328e-72	B cell	CTSZ
RPN2	2.01035e-75	0.909183	0.764	0.345	2.68763e-71	B cell	RPN2
ERLEC1	3.65945e-75	0.716987	0.637	0.212	4.89232e-71	B cell	ERLEC1
CLPTM1L	1.93325e-74	0.525599	0.495	0.133	2.58456e-70	B cell	CLPTM1L
VOPP1	3.68289e-74	0.590466	0.65	0.208	4.92365e-70	B cell	VOPP1
TCF3	3.78498e-74	0.346823	0.332	0.066	5.06014e-70	B cell	TCF3
DNAJB9	1.94856e-73	0.358089	0.459	0.112	2.60503e-69	B cell	DNAJB9
NCOA3	8.11085e-73	0.607584	0.559	0.166	1.08434e-68	B cell	NCOA3
FABP52	5.76843e-72	0.575518	0.405	0.095	7.71181e-68	B cell	FABP5
SEC14L11	4.37045e-71	0.505695	0.541	0.153	5.84285e-67	B cell	SEC14L1
HLA-DRA3	1.03591e-68	0.850831	0.65	0.228	1.3849e-64	B cell	HLA-DRA
MLEC	5.06036e-68	0.503653	0.625	0.199	6.76519e-64	B cell	MLEC
SLC1A5	1.46848e-67	0.366944	0.305	0.061	1.96321e-63	B cell	SLC1A5
PIM21	1.41799e-66	0.584284	0.601	0.191	1.89571e-62	B cell	PIM2
COMMD3	2.31971e-65	0.384254	0.562	0.164	3.10122e-61	B cell	COMMD3
CD274	4.70737e-65	0.828582	0.734	0.31	6.29328e-61	B cell	CD27
DERL1	1.54435e-64	0.575726	0.637	0.214	2.06464e-60	B cell	DERL1
OSTC	1.98587e-64	0.824352	0.731	0.346	2.65491e-60	B cell	OSTC
HERPUD12	2.1713e-64	0.777661	0.77	0.356	2.90281e-60	B cell	HERPUD1
SPCS1	2.6831e-64	0.857845	0.852	0.567	3.58704e-60	B cell	SPCS1
CXXC52	5.00541e-64	0.345564	0.526	0.148	6.69173e-60	B cell	CXXC5
XBP11	7.7424e-64	1.05385	0.798	0.476	1.03508e-59	B cell	XBP1
HSH2D2	1.9045e-63	0.409684	0.529	0.151	2.54612e-59	B cell	HSH2D
ALG5	3.79675e-63	0.435297	0.577	0.177	5.07587e-59	B cell	ALG5
CALR1	6.65976e-63	0.963972	0.888	0.627	8.90343e-59	B cell	CALR
ARF4	1.19658e-62	0.458892	0.583	0.188	1.59971e-58	B cell	ARF4
TMEM208	1.30016e-62	0.469795	0.622	0.202	1.73818e-58	B cell	TMEM208
SAR1B	1.5205e-62	0.419885	0.495	0.139	2.03276e-58	B cell	SAR1B
TYMP1	1.79753e-61	0.518719	0.52	0.152	2.40312e-57	B cell	TYMP
CD745	5.50455e-60	0.970246	0.876	0.606	7.35904e-56	B cell	CD74
SLC38A10	9.63063e-59	0.358552	0.48	0.134	1.28752e-54	B cell	SLC38A10
DDOST	1.6885e-57	0.684458	0.725	0.32	2.25735e-53	B cell	DDOST
SPCS3	1.205e-56	0.809465	0.764	0.414	1.61096e-52	B cell	SPCS3
SLAMF71	1.21729e-56	0.402067	0.55	0.173	1.6274e-52	B cell	SLAMF7
SEC61B	8.50318e-55	0.900873	0.813	0.593	1.13679e-50	B cell	SEC61B
TMED9	2.81829e-53	0.735767	0.749	0.362	3.76778e-49	B cell	TMED9
SRM	3.48148e-53	0.530229	0.48	0.156	4.65439e-49	B cell	SRM
SND1	4.80328e-53	0.418446	0.547	0.178	6.42151e-49	B cell	SND1
PABPC4	5.18835e-53	0.453875	0.553	0.184	6.9363e-49	B cell	PABPC4
FAM3C	3.79725e-52	0.336703	0.396	0.106	5.07655e-48	B cell	FAM3C
CREB3L2	4.17844e-51	0.382124	0.384	0.105	5.58616e-47	B cell	CREB3L2
SMARCB11	8.31233e-51	0.398605	0.553	0.184	1.11128e-46	B cell	SMARCB1
PDK1	9.15772e-50	0.358326	0.323	0.083	1.2243e-45	B cell	PDK1
GNL3	1.25999e-49	0.354784	0.52	0.17	1.68448e-45	B cell	GNL3
ISG202	7.86986e-49	0.791369	0.822	0.583	1.05212e-44	B cell	ISG20
P4HB1	9.26213e-49	0.741185	0.798	0.462	1.23825e-44	B cell	P4HB
LMAN2	1.55588e-48	0.683669	0.761	0.416	2.08006e-44	B cell	LMAN2
HLA-DRB15	5.24617e-48	0.57204	0.701	0.298	7.0136e-44	B cell	HLA-DRB1
RABAC1	1.64269e-45	0.641794	0.795	0.471	2.19612e-41	B cell	RABAC1
SSR1	3.80027e-44	0.495216	0.634	0.265	5.08059e-40	B cell	SSR1
TMEM258	8.21413e-44	0.688949	0.807	0.551	1.09815e-39	B cell	TMEM258
UBE2G1	1.63064e-41	0.336536	0.526	0.185	2.18e-37	B cell	UBE2G1
ERGIC3	3.46674e-41	0.399531	0.622	0.241	4.63468e-37	B cell	ERGIC3
ATF4	3.00263e-38	0.35514	0.671	0.293	4.01421e-34	B cell	ATF4
FDX1	1.1569e-37	0.327999	0.544	0.203	1.54666e-33	B cell	FDX1
SEL1L	2.36437e-37	0.360237	0.459	0.165	3.16092e-33	B cell	SEL1L
LGALS32	2.52627e-36	0.348359	0.414	0.139	3.37738e-32	B cell	LGALS3
MRPL521	2.04553e-34	0.407744	0.64	0.282	2.73467e-30	B cell	MRPL52
LRPAP1	5.41985e-33	0.448468	0.695	0.328	7.2458e-29	B cell	LRPAP1
DNAJC3	8.05723e-33	0.372962	0.562	0.232	1.07717e-28	B cell	DNAJC3
PEBP1	3.15833e-32	0.709754	0.716	0.474	4.22237e-28	B cell	PEBP1
DAD1	9.52143e-31	0.539537	0.779	0.53	1.27292e-26	B cell	DAD1
TMED10	3.17229e-29	0.422983	0.71	0.39	4.24103e-25	B cell	TMED10
ZNF7061	3.24611e-29	0.441631	0.689	0.371	4.33972e-25	B cell	ZNF706
MESD	8.39844e-29	0.323141	0.616	0.279	1.12279e-24	B cell	MESD
SEC61G	2.49163e-28	0.670822	0.752	0.526	3.33107e-24	B cell	SEC61G
PRDX12	2.56588e-27	0.551476	0.695	0.39	3.43033e-23	B cell	PRDX1
SSR2	2.71195e-27	0.457022	0.864	0.712	3.62561e-23	B cell	SSR2
COPE	7.5493e-26	0.44418	0.782	0.517	1.00927e-21	B cell	COPE
TMBIM6	5.9946e-25	0.451303	0.846	0.659	8.01418e-21	B cell	TMBIM6
ITGB7	6.78087e-24	0.348972	0.674	0.341	9.06534e-20	B cell	ITGB7
CANX	6.82144e-23	0.399986	0.707	0.404	9.11958e-19	B cell	CANX
SELENOK	8.10998e-20	0.392819	0.692	0.391	1.08422e-15	B cell	SELENOK
COX5A2	1.09559e-19	0.426889	0.707	0.435	1.46469e-15	B cell	COX5A
SERP1	1.88588e-19	0.402397	0.795	0.581	2.52124e-15	B cell	SERP1
ANXA23	2.76827e-19	0.433427	0.749	0.46	3.70089e-15	B cell	ANXA2
SEC62	5.22425e-19	0.324348	0.773	0.481	6.9843e-15	B cell	SEC62
PARP11	7.36495e-19	0.357897	0.644	0.352	9.8462e-15	B cell	PARP1
UQCRQ1	1.46297e-18	0.34443	0.704	0.45	1.95585e-14	B cell	UQCRQ
UQCRH1	1.55244e-16	0.465362	0.782	0.63	2.07546e-12	B cell	UQCRH
LGALS13	3.93126e-16	0.465199	0.752	0.5	5.2557e-12	B cell	LGALS1
CST31	3.69531e-07	0.449503	0.251	0.143	0.00494025	B cell	CST3
TUBB4B1	4.35041e-07	0.432236	0.341	0.202	0.00581607	B cell	TUBB4B
GAPDH2	2.46603e-05	0.502902	0.879	0.879	0.329683	B cell	GAPDH
S100A92	0.000101368	0.668516	0.477	0.32	1	B cell	S100A9
S100A91	0	2.53719	0.71	0.312	0	L/M doublet	S100A9
S100A8	0	2.39414	0.598	0.231	0	L/M doublet	S100A8
LYZ	0	2.26478	0.645	0.24	0	L/M doublet	LYZ
VCAN	0	1.68065	0.356	0.064	0	L/M doublet	VCAN
FCN1	0	1.63093	0.36	0.07	0	L/M doublet	FCN1
CST3	6.80648e-304	1.90329	0.448	0.136	9.09958e-300	L/M doublet	CST3
FTL	1.44367e-270	1.08331	0.923	0.967	1.93004e-266	L/M doublet	FTL
HLA-DRA1	2.57765e-182	1.57196	0.492	0.225	3.44605e-178	L/M doublet	HLA-DRA
AIF1	7.5818e-176	1.53809	0.366	0.132	1.01361e-171	L/M doublet	AIF1
FTH11	6.5766e-149	0.864642	0.858	0.958	8.79226e-145	L/M doublet	FTH1
LST11	2.21757e-132	1.49842	0.341	0.137	2.96467e-128	L/M doublet	LST1
GRN	4.09213e-104	1.02675	0.274	0.102	5.47077e-100	L/M doublet	GRN
SAT12	2.731e-96	1.2105	0.616	0.544	3.65107e-92	L/M doublet	SAT1
CTSS	3.15507e-93	1.29697	0.573	0.472	4.21801e-89	L/M doublet	CTSS
TYMP	2.01822e-91	1.05871	0.324	0.15	2.69816e-87	L/M doublet	TYMP
IGKC	8.97069e-53	1.02007	0.287	0.156	1.19929e-48	L/M doublet	IGKC
NEAT11	6.13622e-51	0.74976	0.693	0.761	8.20351e-47	L/M doublet	NEAT1
FOS2	1.73566e-48	0.874616	0.571	0.528	2.3204e-44	L/M doublet	FOS
TYROBP2	6.85377e-37	0.552453	0.548	0.442	9.16281e-33	L/M doublet	TYROBP
S100A6	9.91965e-36	0.518915	0.728	0.896	1.32616e-31	L/M doublet	S100A6
CEBPD2	4.6669e-33	0.815025	0.264	0.157	6.23918e-29	L/M doublet	CEBPD
DUSP12	9.06481e-28	0.777927	0.513	0.475	1.21187e-23	L/M doublet	DUSP1
GLUL	1.44109e-25	0.711401	0.267	0.169	1.92659e-21	L/M doublet	GLUL
VIM1	6.42299e-25	0.410324	0.727	0.786	8.5869e-21	L/M doublet	VIM
ZFAND5	2.17521e-23	0.941087	0.337	0.257	2.90804e-19	L/M doublet	ZFAND5
CD81	5.38987e-20	0.337214	0.224	0.369	7.20571e-16	L/M doublet	CD81
OAZ11	7.94035e-19	0.45548	0.686	0.88	1.06155e-14	L/M doublet	OAZ1
CD742	1.4387e-18	0.981378	0.564	0.608	1.9234e-14	L/M doublet	CD74
COTL12	5.57005e-16	0.713848	0.435	0.411	7.4466e-12	L/M doublet	COTL1
TKT	7.39696e-15	0.802603	0.367	0.334	9.88899e-11	L/M doublet	TKT
CDC42SE1	2.87291e-14	0.360882	0.354	0.514	3.8408e-10	L/M doublet	CDC42SE1
ASAH1	1.31038e-13	0.707171	0.299	0.236	1.75185e-09	L/M doublet	ASAH1
PSAP	1.60458e-13	0.842055	0.437	0.451	2.14516e-09	L/M doublet	PSAP
HLA-DPA11	1.67489e-11	0.782157	0.391	0.368	2.23916e-07	L/M doublet	HLA-DPA1
C1orf56	1.07681e-10	0.776094	0.277	0.23	1.43959e-06	L/M doublet	C1orf56
LGALS11	6.91451e-10	0.449483	0.499	0.502	9.24401e-06	L/M doublet	LGALS1
CEBPB	5.86784e-09	0.771356	0.271	0.227	7.84472e-05	L/M doublet	CEBPB
HLA-DPB11	3.44354e-08	0.706298	0.447	0.458	0.000460367	L/M doublet	HLA-DPB1
NPC2	4.05107e-08	0.63187	0.264	0.224	0.000541588	L/M doublet	NPC2
APLP21	4.80018e-08	0.577342	0.265	0.221	0.000641736	L/M doublet	APLP2
FOSB2	2.82832e-07	0.661763	0.335	0.304	0.00378118	L/M doublet	FOSB
S100A11	3.74849e-07	0.58656	0.524	0.62	0.00501136	L/M doublet	S100A11
HLA-DRB12	1.31319e-06	0.642314	0.32	0.3	0.017556	L/M doublet	HLA-DRB1
RAC1	3.56946e-06	0.369488	0.306	0.408	0.0477201	L/M doublet	RAC1
GNAI2	1.51093e-05	0.358691	0.414	0.563	0.201996	L/M doublet	GNAI2
SLC38A2	0.000520021	0.500567	0.256	0.329	1	L/M doublet	SLC38A2
FGR2	0.000665068	0.394073	0.269	0.235	1	L/M doublet	FGR
GRK2	0.000947109	0.399616	0.222	0.275	1	L/M doublet	GRK2
HERPUD11	0.00142005	0.380899	0.293	0.36	1	L/M doublet	HERPUD1
CTSD1	0.0020495	0.494206	0.36	0.356	1	L/M doublet	CTSD
CD551	0.00358651	0.359554	0.226	0.271	1	L/M doublet	CD55
ARPC4	0.00802173	0.355797	0.356	0.436	1	L/M doublet	ARPC4
MALAT1	0	0.879181	1	1	0	LowRead	MALAT1
LTB1	2.21826e-69	0.621443	0.696	0.552	2.96559e-65	LowRead	LTB
TRAC2	4.45006e-62	0.983251	0.585	0.539	5.94929e-58	LowRead	TRAC
HLA-A	1.57978e-37	0.333898	0.919	0.987	2.112e-33	LowRead	HLA-A
IL7R	1.62585e-26	0.429299	0.569	0.484	2.1736e-22	LowRead	IL7R
JUNB1	8.76158e-25	0.558819	0.664	0.753	1.17134e-20	LowRead	JUNB
CXCR41	7.33201e-22	0.727482	0.583	0.664	9.80216e-18	LowRead	CXCR4
MDM4	3.81734e-20	0.403066	0.188	0.35	5.10341e-16	LowRead	MDM4
TRABD	4.91328e-19	0.32287	0.16	0.301	6.56857e-15	LowRead	TRABD
CD521	3.00442e-17	0.456998	0.733	0.83	4.01661e-13	LowRead	CD52
VSIR	7.24615e-15	0.330384	0.209	0.354	9.68738e-11	LowRead	VSIR
RNASET2	1.36873e-13	0.32237	0.262	0.432	1.82985e-09	LowRead	RNASET2
SAT11	2.50292e-12	0.357953	0.343	0.552	3.34615e-08	LowRead	SAT1
GADD45B	1.21742e-11	0.336039	0.179	0.296	1.62757e-07	LowRead	GADD45B
SLC3A2	4.0116e-11	0.364384	0.176	0.291	5.3631e-07	LowRead	SLC3A2
CD3D2	6.2419e-11	0.487072	0.558	0.611	8.34479e-07	LowRead	CD3D
TTC19	3.26105e-10	0.441801	0.157	0.259	4.3597e-06	LowRead	TTC19
SPOCK21	5.84317e-10	0.339776	0.275	0.428	7.81174e-06	LowRead	SPOCK2
NKTR	1.15128e-09	0.370806	0.306	0.487	1.53914e-05	LowRead	NKTR
DGKA1	9.13879e-09	0.341053	0.163	0.254	0.000122176	LowRead	DGKA
B2M	1.25064e-08	0.358391	0.999	1	0.000167198	LowRead	B2M
TNRC6B	1.55523e-08	0.378169	0.315	0.49	0.000207919	LowRead	TNRC6B
IL2RG	4.4121e-08	0.404844	0.348	0.54	0.000589854	LowRead	IL2RG
DUSP1	4.82606e-08	0.431185	0.32	0.48	0.000645196	LowRead	DUSP1
IER2	8.20177e-08	0.501824	0.366	0.569	0.00109649	LowRead	IER2
TOB1	9.62572e-08	0.347241	0.165	0.251	0.00128686	LowRead	TOB1
ARID5B1	3.7137e-07	0.337261	0.209	0.308	0.00496485	LowRead	ARID5B
PAG11	4.86697e-07	0.356779	0.19	0.285	0.00650666	LowRead	PAG1
ITM2A	4.90869e-07	0.462969	0.198	0.296	0.00656243	LowRead	ITM2A
TMEM173	1.56672e-06	0.456426	0.171	0.256	0.0209455	LowRead	TMEM173
GSTK11	1.65463e-06	0.675682	0.49	0.617	0.0221208	LowRead	GSTK1
LAT	1.75535e-06	0.432188	0.3	0.458	0.0234673	LowRead	LAT
SLC2A3	2.21044e-06	0.414019	0.188	0.281	0.0295514	LowRead	SLC2A3
N4BP2L2	6.29936e-06	0.369656	0.406	0.634	0.0842162	LowRead	N4BP2L2
FOSB	1.1445e-05	0.397119	0.213	0.308	0.153008	LowRead	FOSB
FOS	6.008e-05	0.605376	0.455	0.531	0.803209	LowRead	FOS
PIK3IP11	0.0001458	0.415322	0.308	0.444	1	LowRead	PIK3IP1
SELL1	0.000165746	0.367527	0.273	0.38	1	LowRead	SELL
CD272	0.000216973	0.379967	0.229	0.314	1	LowRead	CD27
CD6	0.000309402	0.416106	0.204	0.282	1	LowRead	CD6
2021-06-01	0.00364322	0.669297	0.419	0.494	1	LowRead	JUN
ACAP1	0.00495136	0.431522	0.425	0.635	1	LowRead	ACAP1
S100A9	0.0066272	0.808869	0.298	0.322	1	LowRead	S100A9
PBXIP11	0.00756056	0.471267	0.275	0.372	1	LowRead	PBXIP1
CD69	0.00774412	0.507112	0.343	0.487	1	LowRead	CD69
CD8A1	0	1.23361	0.689	0.221	0	P1_CD8+GZMB+GZMH+	CD8A
GZMH1	0	1.17185	0.928	0.427	0	P1_CD8+GZMB+GZMH+	GZMH
CD8B2	0	1.05413	0.595	0.176	0	P1_CD8+GZMB+GZMH+	CD8B
TRGC22	0	0.958907	0.448	0.16	0	P1_CD8+GZMB+GZMH+	TRGC2
CCL52	0	0.787669	0.982	0.633	0	P1_CD8+GZMB+GZMH+	CCL5
CD3D4	0	0.660865	0.9	0.576	0	P1_CD8+GZMB+GZMH+	CD3D
CD3G2	0	0.636747	0.784	0.486	0	P1_CD8+GZMB+GZMH+	CD3G
KLRG12	0	0.610291	0.504	0.245	0	P1_CD8+GZMB+GZMH+	KLRG1
HLA-DPB12	0	0.538705	0.697	0.429	0	P1_CD8+GZMB+GZMH+	HLA-DPB1
ZEB21	0	0.511977	0.572	0.308	0	P1_CD8+GZMB+GZMH+	ZEB2
CD522	0	0.509384	0.94	0.814	0	P1_CD8+GZMB+GZMH+	CD52
FCRL61	0	0.49028	0.395	0.188	0	P1_CD8+GZMB+GZMH+	FCRL6
HLA-DRB14	0	0.465826	0.506	0.276	0	P1_CD8+GZMB+GZMH+	HLA-DRB1
NKG71	0	0.464595	0.983	0.661	0	P1_CD8+GZMB+GZMH+	NKG7
FGFBP21	0	0.408435	0.82	0.422	0	P1_CD8+GZMB+GZMH+	FGFBP2
SH3BGRL3	0	0.404396	0.962	0.934	0	P1_CD8+GZMB+GZMH+	SH3BGRL3
IL323	0	0.367438	0.957	0.791	0	P1_CD8+GZMB+GZMH+	IL32
CST71	0	0.336882	0.906	0.607	0	P1_CD8+GZMB+GZMH+	CST7
CD3E1	1.09737e-284	0.38915	0.846	0.654	1.46708e-280	P1_CD8+GZMB+GZMH+	CD3E
HLA-DPA12	7.63679e-255	0.408821	0.549	0.347	1.02096e-250	P1_CD8+GZMB+GZMH+	HLA-DPA1
C12orf752	1.97233e-250	0.426482	0.627	0.434	2.63681e-246	P1_CD8+GZMB+GZMH+	C12orf75
TRAC4	1.56909e-248	0.446432	0.726	0.518	2.09772e-244	P1_CD8+GZMB+GZMH+	TRAC
S100A41	3.72026e-218	0.327199	0.964	0.915	4.97362e-214	P1_CD8+GZMB+GZMH+	S100A4
PLEK1	6.17934e-196	0.35712	0.582	0.384	8.26115e-192	P1_CD8+GZMB+GZMH+	PLEK
C1orf211	3.88383e-173	0.343934	0.382	0.22	5.19229e-169	P1_CD8+GZMB+GZMH+	C1orf21
CYTOR1	4.8305e-145	0.350718	0.434	0.289	6.45789e-141	P1_CD8+GZMB+GZMH+	CYTOR
THEMIS1	8.61408e-143	0.386402	0.276	0.156	1.15162e-138	P1_CD8+GZMB+GZMH+	THEMIS
TGFBR31	5.07651e-115	0.322371	0.309	0.191	6.78678e-111	P1_CD8+GZMB+GZMH+	TGFBR3
TRABD2A	2.43162e-116	0.401456	0.526	0.148	3.25083e-112	P10_CD4+CD8+Naive	TRABD2A
CCR7	7.59849e-104	0.407433	0.526	0.16	1.01584e-99	P10_CD4+CD8+Naive	CCR7
SATB11	1.06174e-91	0.426461	0.636	0.227	1.41945e-87	P10_CD4+CD8+Naive	SATB1
HIPK21	1.16945e-84	0.372109	0.531	0.176	1.56344e-80	P10_CD4+CD8+Naive	HIPK2
RCAN31	4.8929e-77	0.360652	0.651	0.254	6.54131e-73	P10_CD4+CD8+Naive	RCAN3
TCF71	1.66309e-72	0.417652	0.778	0.359	2.22339e-68	P10_CD4+CD8+Naive	TCF7
HIST1H1D1	7.23977e-64	0.39831	0.809	0.414	9.67885e-60	P10_CD4+CD8+Naive	HIST1H1D
GCC2	9.46343e-48	0.327834	0.811	0.456	1.26517e-43	P10_CD4+CD8+Naive	GCC2
ATM	2.084e-46	0.348924	0.885	0.567	2.7861e-42	P10_CD4+CD8+Naive	ATM
HIST1H4C1	4.17546e-44	0.352309	0.847	0.504	5.58217e-40	P10_CD4+CD8+Naive	HIST1H4C
KLRB11	0	1.15765	0.855	0.502	0	P11_CD4-CD8-LTB+IL7R+	KLRB1
GZMK1	0	1.15714	0.837	0.219	0	P11_CD4-CD8-LTB+IL7R+	GZMK
SLC4A10	0	1.09108	0.378	0.006	0	P11_CD4-CD8-LTB+IL7R+	SLC4A10
IL7R1	0	1.06617	0.912	0.476	0	P11_CD4-CD8-LTB+IL7R+	IL7R
KLRG11	0	0.949167	0.695	0.262	0	P11_CD4-CD8-LTB+IL7R+	KLRG1
CXCR6	0	0.721053	0.266	0.025	0	P11_CD4-CD8-LTB+IL7R+	CXCR6
DPP4	1.80562e-282	0.736043	0.387	0.093	2.41393e-278	P11_CD4-CD8-LTB+IL7R+	DPP4
JAML	4.44743e-223	0.703088	0.408	0.121	5.94577e-219	P11_CD4-CD8-LTB+IL7R+	JAML
PHACTR21	3.43826e-199	0.836307	0.518	0.205	4.5966e-195	P11_CD4-CD8-LTB+IL7R+	PHACTR2
CEBPD1	1.08173e-176	0.678113	0.437	0.152	1.44617e-172	P11_CD4-CD8-LTB+IL7R+	CEBPD
IL18R1	9.75285e-164	0.556863	0.313	0.09	1.30386e-159	P11_CD4-CD8-LTB+IL7R+	IL18R1
LTB2	1.34391e-161	0.566097	0.91	0.547	1.79667e-157	P11_CD4-CD8-LTB+IL7R+	LTB
PLCB1	7.21846e-157	0.445932	0.256	0.066	9.65036e-153	P11_CD4-CD8-LTB+IL7R+	PLCB1
NCR31	2.54927e-156	0.756075	0.524	0.225	3.40811e-152	P11_CD4-CD8-LTB+IL7R+	NCR3
ERN1	1.00019e-137	0.567267	0.461	0.192	1.33715e-133	P11_CD4-CD8-LTB+IL7R+	ERN1
ABCB1	4.11395e-130	0.451212	0.264	0.077	5.49994e-126	P11_CD4-CD8-LTB+IL7R+	ABCB1
AQP31	3.41064e-129	0.494904	0.449	0.183	4.55969e-125	P11_CD4-CD8-LTB+IL7R+	AQP3
SPOCK22	3.76864e-126	0.574496	0.699	0.417	5.03829e-122	P11_CD4-CD8-LTB+IL7R+	SPOCK2
LYAR1	3.96356e-125	0.570981	0.709	0.409	5.29888e-121	P11_CD4-CD8-LTB+IL7R+	LYAR
GPR171	7.19875e-123	0.560798	0.37	0.143	9.62401e-119	P11_CD4-CD8-LTB+IL7R+	GPR171
ZBTB16	8.85535e-120	0.435278	0.295	0.097	1.18387e-115	P11_CD4-CD8-LTB+IL7R+	ZBTB16
DUSP11	2.23579e-115	0.697857	0.727	0.47	2.98903e-111	P11_CD4-CD8-LTB+IL7R+	DUSP1
TRGC21	1.21477e-113	0.667546	0.424	0.185	1.62402e-109	P11_CD4-CD8-LTB+IL7R+	TRGC2
CXCR42	5.16688e-113	0.546669	0.87	0.656	6.9076e-109	P11_CD4-CD8-LTB+IL7R+	CXCR4
SATB1	2.93716e-108	0.507973	0.482	0.225	3.92668e-104	P11_CD4-CD8-LTB+IL7R+	SATB1
SYTL2	1.99692e-104	0.482805	0.358	0.142	2.66968e-100	P11_CD4-CD8-LTB+IL7R+	SYTL2
MYBL11	7.26953e-104	0.597268	0.515	0.265	9.71863e-100	P11_CD4-CD8-LTB+IL7R+	MYBL1
ATF7IP2	7.24534e-98	0.494714	0.408	0.185	9.68629e-94	P11_CD4-CD8-LTB+IL7R+	ATF7IP2
DUSP21	4.71857e-97	0.637791	0.625	0.363	6.30826e-93	P11_CD4-CD8-LTB+IL7R+	DUSP2
IFNGR1	6.19509e-96	0.4797	0.411	0.185	8.28222e-92	P11_CD4-CD8-LTB+IL7R+	IFNGR1
KDSR	6.38158e-96	0.468891	0.282	0.104	8.53153e-92	P11_CD4-CD8-LTB+IL7R+	KDSR
IL322	1.11682e-94	0.361719	0.963	0.805	1.49308e-90	P11_CD4-CD8-LTB+IL7R+	IL32
PDCD41	5.02843e-94	0.536321	0.668	0.434	6.72251e-90	P11_CD4-CD8-LTB+IL7R+	PDCD4
ZFP36L21	6.01799e-93	0.463239	0.933	0.835	8.04546e-89	P11_CD4-CD8-LTB+IL7R+	ZFP36L2
TC2N1	2.35881e-92	0.489483	0.54	0.29	3.1535e-88	P11_CD4-CD8-LTB+IL7R+	TC2N
SESN1	6.18075e-92	0.494826	0.28	0.107	8.26304e-88	P11_CD4-CD8-LTB+IL7R+	SESN1
CERK	2.37335e-89	0.428174	0.336	0.142	3.17293e-85	P11_CD4-CD8-LTB+IL7R+	CERK
NFKBIA	3.65116e-89	0.594118	0.745	0.544	4.88123e-85	P11_CD4-CD8-LTB+IL7R+	NFKBIA
RORA	8.81701e-89	0.54864	0.662	0.45	1.17875e-84	P11_CD4-CD8-LTB+IL7R+	RORA
CD691	5.94462e-84	0.499859	0.708	0.478	7.94736e-80	P11_CD4-CD8-LTB+IL7R+	CD69
HSP90AB1	1.77845e-79	0.419913	0.831	0.688	2.37762e-75	P11_CD4-CD8-LTB+IL7R+	HSP90AB1
ODF2L	1.48608e-78	0.501712	0.537	0.318	1.98674e-74	P11_CD4-CD8-LTB+IL7R+	ODF2L
FKBP11	8.28248e-78	0.45246	0.566	0.334	1.10729e-73	P11_CD4-CD8-LTB+IL7R+	FKBP11
MYC	2.59582e-73	0.40671	0.332	0.152	3.47035e-69	P11_CD4-CD8-LTB+IL7R+	MYC
LST1	2.97284e-73	0.429596	0.31	0.138	3.97439e-69	P11_CD4-CD8-LTB+IL7R+	LST1
PDE4D	1.57324e-71	0.475854	0.322	0.147	2.10326e-67	P11_CD4-CD8-LTB+IL7R+	PDE4D
GBP52	3.19074e-69	0.421166	0.521	0.3	4.2657e-65	P11_CD4-CD8-LTB+IL7R+	GBP5
PARP8	8.39718e-69	0.433325	0.568	0.356	1.12262e-64	P11_CD4-CD8-LTB+IL7R+	PARP8
EOMES	9.71282e-64	0.33118	0.281	0.122	1.29851e-59	P11_CD4-CD8-LTB+IL7R+	EOMES
ELK31	2.68337e-62	0.383065	0.291	0.134	3.5874e-58	P11_CD4-CD8-LTB+IL7R+	ELK3
TOB11	2.04818e-61	0.481697	0.432	0.244	2.73822e-57	P11_CD4-CD8-LTB+IL7R+	TOB1
TNFAIP3	7.80332e-60	0.484232	0.558	0.356	1.04323e-55	P11_CD4-CD8-LTB+IL7R+	TNFAIP3
GPR651	7.81425e-60	0.374028	0.532	0.316	1.04469e-55	P11_CD4-CD8-LTB+IL7R+	GPR65
EML41	1.46095e-57	0.398416	0.545	0.349	1.95315e-53	P11_CD4-CD8-LTB+IL7R+	EML4
TTC39C1	1.49229e-54	0.350857	0.499	0.301	1.99504e-50	P11_CD4-CD8-LTB+IL7R+	TTC39C
PRR5	2.49726e-52	0.375739	0.306	0.154	3.33859e-48	P11_CD4-CD8-LTB+IL7R+	PRR5
TNFRSF251	3.09482e-52	0.35552	0.326	0.17	4.13746e-48	P11_CD4-CD8-LTB+IL7R+	TNFRSF25
ARL14EP	1.27281e-48	0.379767	0.357	0.2	1.70163e-44	P11_CD4-CD8-LTB+IL7R+	ARL14EP
PPP1R14B	1.7877e-47	0.339209	0.283	0.143	2.38998e-43	P11_CD4-CD8-LTB+IL7R+	PPP1R14B
PPA1	1.25741e-44	0.327265	0.502	0.324	1.68103e-40	P11_CD4-CD8-LTB+IL7R+	PPA1
YWHAH	1.69442e-43	0.326325	0.321	0.172	2.26527e-39	P11_CD4-CD8-LTB+IL7R+	YWHAH
DNAJB1	1.28404e-42	0.390709	0.506	0.34	1.71663e-38	P11_CD4-CD8-LTB+IL7R+	DNAJB1
PRDM11	7.59412e-41	0.329102	0.556	0.378	1.01526e-36	P11_CD4-CD8-LTB+IL7R+	PRDM1
CTSA1	2.04139e-39	0.385168	0.32	0.179	2.72914e-35	P11_CD4-CD8-LTB+IL7R+	CTSA
2021-06-02	1.1412e-22	0.361667	0.603	0.489	1.52567e-18	P11_CD4-CD8-LTB+IL7R+	JUN
FOSB1	2.5296e-21	0.333005	0.42	0.302	3.38182e-17	P11_CD4-CD8-LTB+IL7R+	FOSB
ZFP361	2.83854e-18	0.341567	0.581	0.461	3.79484e-14	P11_CD4-CD8-LTB+IL7R+	ZFP36
XCL1	0	1.97558	0.699	0.032	0	P12_CD4-CD8-XCL1+XCL2+	XCL1
XCL2	0	1.61288	0.701	0.12	0	P12_CD4-CD8-XCL1+XCL2+	XCL2
SELL2	0	1.54168	0.924	0.365	0	P12_CD4-CD8-XCL1+XCL2+	SELL
KLRC11	0	1.51575	0.765	0.167	0	P12_CD4-CD8-XCL1+XCL2+	KLRC1
SPTSSB	0	1.40481	0.465	0.007	0	P12_CD4-CD8-XCL1+XCL2+	SPTSSB
GNLY1	0	1.37368	0.972	0.53	0	P12_CD4-CD8-XCL1+XCL2+	GNLY
CMC12	0	1.25166	0.879	0.371	0	P12_CD4-CD8-XCL1+XCL2+	CMC1
ITGAX	0	1.21969	0.527	0.077	0	P12_CD4-CD8-XCL1+XCL2+	ITGAX
IL2RB1	0	1.15618	0.817	0.353	0	P12_CD4-CD8-XCL1+XCL2+	IL2RB
NCAM1	0	1.09051	0.473	0.075	0	P12_CD4-CD8-XCL1+XCL2+	NCAM1
TNFRSF18	0	1.08478	0.5	0.1	0	P12_CD4-CD8-XCL1+XCL2+	TNFRSF18
IFITM31	0	1.07084	0.59	0.174	0	P12_CD4-CD8-XCL1+XCL2+	IFITM3
CAPG	0	1.03486	0.437	0.082	0	P12_CD4-CD8-XCL1+XCL2+	CAPG
GZMK2	0	1.02793	0.77	0.222	0	P12_CD4-CD8-XCL1+XCL2+	GZMK
KIR2DL4	0	1.00599	0.278	0.014	0	P12_CD4-CD8-XCL1+XCL2+	KIR2DL4
IL18R11	0	0.988664	0.426	0.088	0	P12_CD4-CD8-XCL1+XCL2+	IL18R1
TRDC1	0	0.966035	0.802	0.277	0	P12_CD4-CD8-XCL1+XCL2+	TRDC
KLRF11	0	0.894104	0.845	0.345	0	P12_CD4-CD8-XCL1+XCL2+	KLRF1
TYROBP1	0	0.887733	0.962	0.433	0	P12_CD4-CD8-XCL1+XCL2+	TYROBP
CAPN12	0	0.843757	0.382	0.08	0	P12_CD4-CD8-XCL1+XCL2+	CAPN12
PPP1R9A	0	0.838216	0.26	0.004	0	P12_CD4-CD8-XCL1+XCL2+	PPP1R9A
FCER1G1	0	0.833984	0.9	0.338	0	P12_CD4-CD8-XCL1+XCL2+	FCER1G
HVCN1	0	0.727286	0.284	0.042	0	P12_CD4-CD8-XCL1+XCL2+	HVCN1
RAMP1	0	0.7098	0.273	0.041	0	P12_CD4-CD8-XCL1+XCL2+	RAMP1
CTSW1	3.53635e-290	0.942957	0.968	0.649	4.72775e-286	P12_CD4-CD8-XCL1+XCL2+	CTSW
AREG1	2.95459e-259	1.01603	0.456	0.125	3.95e-255	P12_CD4-CD8-XCL1+XCL2+	AREG
KLRD11	5.51894e-259	0.828053	0.915	0.496	7.37828e-255	P12_CD4-CD8-XCL1+XCL2+	KLRD1
IFITM21	3.90721e-258	0.823073	0.965	0.744	5.22355e-254	P12_CD4-CD8-XCL1+XCL2+	IFITM2
GSN	4.26868e-250	0.746028	0.366	0.085	5.7068e-246	P12_CD4-CD8-XCL1+XCL2+	GSN
IL18RAP	4.92984e-246	0.747095	0.368	0.088	6.59071e-242	P12_CD4-CD8-XCL1+XCL2+	IL18RAP
HOPX1	3.71232e-238	0.820095	0.865	0.457	4.96301e-234	P12_CD4-CD8-XCL1+XCL2+	HOPX
CD71	1.00283e-207	0.890396	0.91	0.64	1.34068e-203	P12_CD4-CD8-XCL1+XCL2+	CD7
FUT7	7.66083e-200	0.671228	0.257	0.054	1.02418e-195	P12_CD4-CD8-XCL1+XCL2+	FUT7
CXXC51	2.42336e-184	0.701615	0.44	0.144	3.23979e-180	P12_CD4-CD8-XCL1+XCL2+	CXXC5
PLAC81	1.53078e-182	0.705558	0.854	0.538	2.0465e-178	P12_CD4-CD8-XCL1+XCL2+	PLAC8
CD631	5.32278e-182	0.690415	0.843	0.55	7.11602e-178	P12_CD4-CD8-XCL1+XCL2+	CD63
SRGN1	2.85069e-181	0.63817	0.959	0.807	3.81108e-177	P12_CD4-CD8-XCL1+XCL2+	SRGN
ID21	4.49525e-169	0.725103	0.881	0.583	6.0097e-165	P12_CD4-CD8-XCL1+XCL2+	ID2
FOS1	3.92509e-147	0.692392	0.817	0.523	5.24745e-143	P12_CD4-CD8-XCL1+XCL2+	FOS
CD300A1	1.19465e-142	0.659901	0.513	0.218	1.59712e-138	P12_CD4-CD8-XCL1+XCL2+	CD300A
DUSP22	1.87861e-135	0.70279	0.673	0.362	2.51152e-131	P12_CD4-CD8-XCL1+XCL2+	DUSP2
ITGAM1	2.10178e-135	0.590261	0.404	0.149	2.80987e-131	P12_CD4-CD8-XCL1+XCL2+	ITGAM
NCR11	1.16878e-126	0.533288	0.31	0.099	1.56254e-122	P12_CD4-CD8-XCL1+XCL2+	NCR1
MATK1	5.24854e-125	0.618826	0.678	0.383	7.01677e-121	P12_CD4-CD8-XCL1+XCL2+	MATK
LYST	1.00946e-124	0.707998	0.494	0.231	1.34955e-120	P12_CD4-CD8-XCL1+XCL2+	LYST
TXK1	1.455e-123	0.650525	0.599	0.316	1.94519e-119	P12_CD4-CD8-XCL1+XCL2+	TXK
BHLHE40	3.59126e-121	0.628424	0.351	0.129	4.80116e-117	P12_CD4-CD8-XCL1+XCL2+	BHLHE40
JAK11	1.88934e-115	0.552383	0.828	0.683	2.52585e-111	P12_CD4-CD8-XCL1+XCL2+	JAK1
H3F3B	2.42471e-107	0.386175	0.98	0.927	3.2416e-103	P12_CD4-CD8-XCL1+XCL2+	H3F3B
SH2D1B1	2.26787e-106	0.504008	0.366	0.139	3.03192e-102	P12_CD4-CD8-XCL1+XCL2+	SH2D1B
C1orf1621	3.33588e-103	0.523006	0.644	0.357	4.45974e-99	P12_CD4-CD8-XCL1+XCL2+	C1orf162
PTGDR1	2.14452e-100	0.552786	0.494	0.236	2.867e-96	P12_CD4-CD8-XCL1+XCL2+	PTGDR
TRGC1	2.87653e-96	0.442534	0.372	0.15	3.84564e-92	P12_CD4-CD8-XCL1+XCL2+	TRGC1
CLASP1	3.91592e-96	0.544547	0.251	0.085	5.2352e-92	P12_CD4-CD8-XCL1+XCL2+	CLASP1
MAP3K81	3.14385e-94	0.597597	0.384	0.166	4.20301e-90	P12_CD4-CD8-XCL1+XCL2+	MAP3K8
CD441	4.56486e-94	0.547477	0.716	0.507	6.10276e-90	P12_CD4-CD8-XCL1+XCL2+	CD44
HSH2D1	4.66032e-89	0.558095	0.352	0.149	6.23039e-85	P12_CD4-CD8-XCL1+XCL2+	HSH2D
STK17A1	2.97582e-85	0.51691	0.724	0.529	3.97837e-81	P12_CD4-CD8-XCL1+XCL2+	STK17A
RUNX31	4.90741e-83	0.49335	0.659	0.435	6.56072e-79	P12_CD4-CD8-XCL1+XCL2+	RUNX3
VAV31	5.74013e-82	0.536184	0.349	0.156	7.67398e-78	P12_CD4-CD8-XCL1+XCL2+	VAV3
SLFN13	7.93533e-82	0.509492	0.272	0.105	1.06087e-77	P12_CD4-CD8-XCL1+XCL2+	SLFN13
CD741	1.14922e-80	0.564752	0.806	0.603	1.53639e-76	P12_CD4-CD8-XCL1+XCL2+	CD74
NCALD	2.73788e-76	0.445674	0.277	0.11	3.66027e-72	P12_CD4-CD8-XCL1+XCL2+	NCALD
B4GALT1	1.8575e-74	0.541644	0.389	0.194	2.48329e-70	P12_CD4-CD8-XCL1+XCL2+	B4GALT1
IGFBP71	4.35061e-70	0.365102	0.419	0.197	5.81633e-66	P12_CD4-CD8-XCL1+XCL2+	IGFBP7
NFKBIA1	3.46207e-69	0.504395	0.728	0.544	4.62845e-65	P12_CD4-CD8-XCL1+XCL2+	NFKBIA
CD21	4.43928e-61	0.447057	0.771	0.635	5.93487e-57	P12_CD4-CD8-XCL1+XCL2+	CD2
BST21	5.89576e-61	0.454348	0.622	0.44	7.88204e-57	P12_CD4-CD8-XCL1+XCL2+	BST2
MCTP21	1.50479e-60	0.440893	0.341	0.169	2.01175e-56	P12_CD4-CD8-XCL1+XCL2+	MCTP2
CD55	2.82235e-60	0.465105	0.452	0.266	3.77319e-56	P12_CD4-CD8-XCL1+XCL2+	CD55
SEC11A	8.33574e-59	0.442878	0.612	0.45	1.11441e-54	P12_CD4-CD8-XCL1+XCL2+	SEC11A
COTL11	9.41873e-59	0.501385	0.595	0.408	1.25919e-54	P12_CD4-CD8-XCL1+XCL2+	COTL1
LTA4H	4.12295e-58	0.475385	0.31	0.153	5.51197e-54	P12_CD4-CD8-XCL1+XCL2+	LTA4H
IER21	1.91275e-57	0.420537	0.729	0.56	2.55715e-53	P12_CD4-CD8-XCL1+XCL2+	IER2
CDKN2D	8.52529e-54	0.407176	0.515	0.335	1.13975e-49	P12_CD4-CD8-XCL1+XCL2+	CDKN2D
QKI	8.97071e-54	0.552674	0.351	0.193	1.19929e-49	P12_CD4-CD8-XCL1+XCL2+	QKI
RRBP1	1.98424e-53	0.503585	0.353	0.192	2.65273e-49	P12_CD4-CD8-XCL1+XCL2+	RRBP1
ARAP2	3.24953e-52	0.467948	0.468	0.3	4.34429e-48	P12_CD4-CD8-XCL1+XCL2+	ARAP2
PLCG2	8.47332e-52	0.402275	0.406	0.238	1.1328e-47	P12_CD4-CD8-XCL1+XCL2+	PLCG2
TAGLN21	2.42431e-51	0.413414	0.712	0.562	3.24105e-47	P12_CD4-CD8-XCL1+XCL2+	TAGLN2
CHD9	7.58738e-50	0.44475	0.4	0.235	1.01436e-45	P12_CD4-CD8-XCL1+XCL2+	CHD9
MRPL14	5.74959e-48	0.405386	0.392	0.232	7.68663e-44	P12_CD4-CD8-XCL1+XCL2+	MRPL14
TPST21	6.6763e-46	0.395949	0.512	0.344	8.92555e-42	P12_CD4-CD8-XCL1+XCL2+	TPST2
TCF7	7.40286e-44	0.342389	0.547	0.359	9.89688e-40	P12_CD4-CD8-XCL1+XCL2+	TCF7
SAMD31	1.41165e-43	0.380467	0.585	0.415	1.88723e-39	P12_CD4-CD8-XCL1+XCL2+	SAMD3
LPGAT1	1.71453e-43	0.419602	0.342	0.199	2.29216e-39	P12_CD4-CD8-XCL1+XCL2+	LPGAT1
LYN1	1.82524e-42	0.343262	0.272	0.135	2.44016e-38	P12_CD4-CD8-XCL1+XCL2+	LYN
2021-09-11	2.17801e-42	0.388802	0.281	0.148	2.91178e-38	P12_CD4-CD8-XCL1+XCL2+	2021-09-11
GSTP11	5.31366e-41	0.348093	0.732	0.589	7.10383e-37	P12_CD4-CD8-XCL1+XCL2+	GSTP1
CLDND11	7.75875e-41	0.382155	0.35	0.206	1.03727e-36	P12_CD4-CD8-XCL1+XCL2+	CLDND1
BAZ2B	9.6235e-39	0.380159	0.283	0.154	1.28657e-34	P12_CD4-CD8-XCL1+XCL2+	BAZ2B
MBP	2.42022e-38	0.323595	0.701	0.579	3.23559e-34	P12_CD4-CD8-XCL1+XCL2+	MBP
PTPN121	4.05681e-38	0.330695	0.341	0.195	5.42355e-34	P12_CD4-CD8-XCL1+XCL2+	PTPN12
ARHGAP91	1.13962e-37	0.399581	0.447	0.301	1.52356e-33	P12_CD4-CD8-XCL1+XCL2+	ARHGAP9
FXYD51	1.25881e-37	0.327921	0.786	0.659	1.68291e-33	P12_CD4-CD8-XCL1+XCL2+	FXYD5
PPP3CA	1.62546e-37	0.351533	0.371	0.23	2.17308e-33	P12_CD4-CD8-XCL1+XCL2+	PPP3CA
FLOT1	7.93678e-36	0.37718	0.311	0.181	1.06107e-31	P12_CD4-CD8-XCL1+XCL2+	FLOT1
SLC25A36	2.81737e-35	0.339544	0.294	0.168	3.76654e-31	P12_CD4-CD8-XCL1+XCL2+	SLC25A36
LMO4	2.90156e-35	0.32868	0.301	0.172	3.8791e-31	P12_CD4-CD8-XCL1+XCL2+	LMO4
NSMCE1	3.81435e-35	0.406093	0.32	0.193	5.09941e-31	P12_CD4-CD8-XCL1+XCL2+	NSMCE1
BEX4	5.57335e-35	0.349173	0.295	0.169	7.45101e-31	P12_CD4-CD8-XCL1+XCL2+	BEX4
WHAMM	9.11267e-35	0.406492	0.294	0.172	1.21827e-30	P12_CD4-CD8-XCL1+XCL2+	WHAMM
PILRB	1.27691e-34	0.370236	0.284	0.162	1.7071e-30	P12_CD4-CD8-XCL1+XCL2+	PILRB
FGR1	3.67027e-34	0.329097	0.385	0.233	4.90678e-30	P12_CD4-CD8-XCL1+XCL2+	FGR
PDCD42	8.63315e-34	0.331138	0.569	0.437	1.15417e-29	P12_CD4-CD8-XCL1+XCL2+	PDCD4
NHLRC3	2.11791e-33	0.341415	0.283	0.163	2.83144e-29	P12_CD4-CD8-XCL1+XCL2+	NHLRC3
SLC39A10	2.4847e-33	0.394165	0.28	0.163	3.3218e-29	P12_CD4-CD8-XCL1+XCL2+	SLC39A10
SEC14L1	3.73515e-32	0.352002	0.267	0.153	4.99352e-28	P12_CD4-CD8-XCL1+XCL2+	SEC14L1
GATA3	7.87343e-31	0.355824	0.352	0.224	1.0526e-26	P12_CD4-CD8-XCL1+XCL2+	GATA3
MPG	1.20697e-29	0.346693	0.366	0.242	1.6136e-25	P12_CD4-CD8-XCL1+XCL2+	MPG
IRF1	1.26329e-29	0.393698	0.636	0.528	1.68889e-25	P12_CD4-CD8-XCL1+XCL2+	IRF1
PLCL2	3.15921e-28	0.340664	0.327	0.212	4.22355e-24	P12_CD4-CD8-XCL1+XCL2+	PLCL2
GBP4	2.68592e-27	0.346854	0.346	0.229	3.59081e-23	P12_CD4-CD8-XCL1+XCL2+	GBP4
ACTN41	7.80936e-27	0.332431	0.481	0.36	1.04403e-22	P12_CD4-CD8-XCL1+XCL2+	ACTN4
FYTTD1	5.08944e-26	0.330879	0.337	0.226	6.80407e-22	P12_CD4-CD8-XCL1+XCL2+	FYTTD1
SOCS1	1.70795e-19	0.331241	0.304	0.211	2.28336e-15	P12_CD4-CD8-XCL1+XCL2+	SOCS1
IFITM11	2.77059e-16	0.325824	0.502	0.396	3.704e-12	P12_CD4-CD8-XCL1+XCL2+	IFITM1
HIST1H1E	2.59295e-13	0.362482	0.506	0.439	3.46651e-09	P12_CD4-CD8-XCL1+XCL2+	HIST1H1E
TRDV2	0	2.10957	0.402	0.005	0	P13_gdT	TRDV2
TRGV9	0	1.47699	0.42	0.044	0	P13_gdT	TRGV9
TRDC2	0	1.35989	0.735	0.274	0	P13_gdT	TRDC
TRGC11	0	1.35224	0.586	0.141	0	P13_gdT	TRGC1
KLRG13	0	0.975921	0.686	0.259	0	P13_gdT	KLRG1
KLRC12	2.4895e-277	0.839919	0.497	0.17	3.32821e-273	P13_gdT	KLRC1
CCL53	1.71095e-242	0.573348	0.976	0.66	2.28737e-238	P13_gdT	CCL5
PTMS	9.82182e-211	0.64551	0.285	0.079	1.31308e-206	P13_gdT	PTMS
TRGC23	7.96942e-175	0.63043	0.446	0.182	1.06543e-170	P13_gdT	TRGC2
KLRD13	1.23359e-147	0.456627	0.834	0.494	1.64919e-143	P13_gdT	KLRD1
DUSP23	3.15104e-145	0.738601	0.613	0.361	4.21263e-141	P13_gdT	DUSP2
IL324	6.27651e-133	0.400401	0.947	0.804	8.39107e-129	P13_gdT	IL32
KLRB13	8.49043e-119	0.485349	0.779	0.501	1.13508e-114	P13_gdT	KLRB1
LYAR3	2.39242e-114	0.484711	0.649	0.409	3.19843e-110	P13_gdT	LYAR
HOPX2	1.09165e-111	0.388997	0.744	0.456	1.45942e-107	P13_gdT	HOPX
CD3E2	1.46708e-108	0.450827	0.861	0.668	1.96134e-104	P13_gdT	CD3E
CST73	2.58404e-108	0.339091	0.915	0.63	3.4546e-104	P13_gdT	CST7
CCL42	2.22932e-104	0.423015	0.708	0.443	2.98038e-100	P13_gdT	CCL4
MATK2	6.10217e-81	0.39001	0.604	0.382	8.15799e-77	P13_gdT	MATK
GZMM1	2.58705e-78	0.324336	0.818	0.651	3.45863e-74	P13_gdT	GZMM
GZMK4	1.04955e-77	0.39519	0.428	0.227	1.40314e-73	P13_gdT	GZMK
SPOCK24	2.55856e-52	0.355699	0.572	0.419	3.42054e-48	P13_gdT	SPOCK2
PPDPF	4.46825e-46	0.360666	0.813	0.731	5.9736e-42	P13_gdT	PPDPF
GABARAPL1	4.28388e-43	0.330854	0.271	0.154	5.72712e-39	P13_gdT	GABARAPL1
FKBP112	9.80811e-41	0.324758	0.464	0.335	1.31125e-36	P13_gdT	FKBP11
ZFP362	2.2655e-38	0.383196	0.596	0.46	3.02875e-34	P13_gdT	ZFP36
GABARAP	2.6099e-22	0.352654	0.29	0.206	3.48918e-18	P13_gdT	GABARAP
IFI44L	1.2166e-130	1.57938	0.451	0.026	1.62647e-126	P14_ISGhi	IFI44L
IFIT1	1.81444e-118	0.974185	0.305	0.013	2.42573e-114	P14_ISGhi	IFIT1
IFIT3	3.74095e-103	1.35109	0.402	0.026	5.00128e-99	P14_ISGhi	IFIT3
RSAD2	1.34133e-100	0.893718	0.317	0.016	1.79322e-96	P14_ISGhi	RSAD2
OAS11	1.3916e-50	1.03649	0.427	0.055	1.86043e-46	P14_ISGhi	OAS1
MX1	4.80909e-45	1.41516	0.573	0.116	6.42927e-41	P14_ISGhi	MX1
XAF1	2.39913e-38	1.15497	0.756	0.223	3.2074e-34	P14_ISGhi	XAF1
EPSTI12	1.08659e-29	0.997822	0.561	0.149	1.45267e-25	P14_ISGhi	EPSTI1
HERC5	1.72732e-29	0.944148	0.39	0.074	2.30925e-25	P14_ISGhi	HERC5
PARP9	9.66206e-25	0.852664	0.5	0.138	1.29172e-20	P14_ISGhi	PARP9
IFI6	1.02271e-23	1.48111	0.573	0.188	1.36727e-19	P14_ISGhi	IFI6
STAT1	1.47115e-23	0.859425	0.805	0.342	1.96678e-19	P14_ISGhi	STAT1
ISG151	1.65017e-23	1.39294	0.817	0.369	2.20611e-19	P14_ISGhi	ISG15
IFI44	4.41391e-17	0.79903	0.28	0.062	5.90096e-13	P14_ISGhi	IFI44
CD384	5.51272e-17	0.73196	0.415	0.119	7.36996e-13	P14_ISGhi	CD38
IRF71	6.75881e-17	0.846498	0.378	0.105	9.03586e-13	P14_ISGhi	IRF7
IFI35	6.64931e-16	0.684185	0.488	0.171	8.88946e-12	P14_ISGhi	IFI35
BST22	1.67286e-15	0.767499	0.817	0.443	2.23645e-11	P14_ISGhi	BST2
GBP11	6.10531e-15	0.956405	0.561	0.236	8.16219e-11	P14_ISGhi	GBP1
PLSCR1	1.25931e-14	0.691034	0.317	0.084	1.68358e-10	P14_ISGhi	PLSCR1
EIF2AK2	8.88036e-14	0.82835	0.512	0.213	1.18721e-09	P14_ISGhi	EIF2AK2
PARP14	2.58093e-13	0.665759	0.598	0.289	3.45044e-09	P14_ISGhi	PARP14
SAMD9L	4.33844e-13	0.627137	0.561	0.236	5.80006e-09	P14_ISGhi	SAMD9L
DDX60	1.29946e-11	0.515111	0.341	0.112	1.73725e-07	P14_ISGhi	DDX60
TRIM22	3.56132e-11	0.695414	0.646	0.37	4.76113e-07	P14_ISGhi	TRIM22
PLAC82	7.35364e-11	0.60447	0.829	0.544	9.83108e-07	P14_ISGhi	PLAC8
SPON21	7.99218e-11	0.700407	0.72	0.384	1.06848e-06	P14_ISGhi	SPON2
CD2471	8.15191e-11	0.506388	0.902	0.648	1.08983e-06	P14_ISGhi	CD247
MX2	8.48747e-11	0.686387	0.341	0.123	1.13469e-06	P14_ISGhi	MX2
CX3CR11	1.23977e-10	0.76265	0.537	0.262	1.65745e-06	P14_ISGhi	CX3CR1
SAMD9	1.86593e-10	0.566192	0.61	0.31	2.49456e-06	P14_ISGhi	SAMD9
IFI161	3.81207e-10	0.544907	0.768	0.483	5.09635e-06	P14_ISGhi	IFI16
ADAR	5.15626e-10	0.466396	0.707	0.416	6.8934e-06	P14_ISGhi	ADAR
ADGRG11	1.99695e-09	0.538036	0.585	0.285	2.66973e-05	P14_ISGhi	ADGRG1
HIPK22	3.41514e-09	0.486831	0.427	0.179	4.5657e-05	P14_ISGhi	HIPK2
PLEK2	5.56699e-09	0.518733	0.707	0.405	7.44251e-05	P14_ISGhi	PLEK
DTX3L	6.44297e-09	0.627161	0.378	0.161	8.6136e-05	P14_ISGhi	DTX3L
OAS2	7.88254e-09	0.469103	0.341	0.135	0.000105382	P14_ISGhi	OAS2
APOL1	9.59545e-09	0.430535	0.28	0.095	0.000128282	P14_ISGhi	APOL1
GZMB1	9.95605e-09	0.421747	0.793	0.481	0.000133102	P14_ISGhi	GZMB
FGFBP22	1.25974e-08	0.516266	0.756	0.464	0.000168415	P14_ISGhi	FGFBP2
PRF11	2.0656e-08	0.52036	0.805	0.565	0.00027615	P14_ISGhi	PRF1
LY6E2	2.98834e-08	0.587066	0.817	0.621	0.000399511	P14_ISGhi	LY6E
FCGR3A1	1.00304e-07	0.462308	0.683	0.365	0.00134096	P14_ISGhi	FCGR3A
CLIC31	1.55877e-07	0.581888	0.622	0.35	0.00208392	P14_ISGhi	CLIC3
ITGAM2	1.60709e-07	0.404551	0.366	0.154	0.00214851	P14_ISGhi	ITGAM
FCER1G2	1.70859e-07	0.402278	0.646	0.349	0.00228421	P14_ISGhi	FCER1G
GNLY2	1.9268e-07	0.47058	0.793	0.539	0.00257594	P14_ISGhi	GNLY
KLRF12	2.0542e-07	0.42127	0.646	0.355	0.00274626	P14_ISGhi	KLRF1
CTBP21	3.21531e-07	0.349219	0.329	0.133	0.00429854	P14_ISGhi	CTBP2
TYROBP3	3.45237e-07	0.434202	0.744	0.444	0.00461547	P14_ISGhi	TYROBP
SP100	4.0752e-07	0.513313	0.695	0.509	0.00544813	P14_ISGhi	SP100
GNPTAB1	4.19627e-07	0.381112	0.585	0.33	0.00560999	P14_ISGhi	GNPTAB
C1orf212	4.74591e-07	0.411679	0.476	0.237	0.0063448	P14_ISGhi	C1orf21
EFHD21	5.56568e-07	0.454014	0.72	0.504	0.00744076	P14_ISGhi	EFHD2
GBP41	7.06482e-07	0.45701	0.451	0.231	0.00944495	P14_ISGhi	GBP4
RNF213	8.63949e-07	0.44302	0.854	0.689	0.0115501	P14_ISGhi	RNF213
HSH2D3	1.49737e-06	0.617289	0.329	0.153	0.0200183	P14_ISGhi	HSH2D
KLRD12	2.33536e-06	0.416909	0.744	0.504	0.0312214	P14_ISGhi	KLRD1
GSAP1	2.41665e-06	0.324512	0.329	0.144	0.0323082	P14_ISGhi	GSAP
CST72	2.4508e-06	0.466766	0.805	0.638	0.0327648	P14_ISGhi	CST7
UBE2L6	2.53523e-06	0.466136	0.524	0.314	0.0338935	P14_ISGhi	UBE2L6
DDX58	4.08418e-06	0.459071	0.268	0.117	0.0546014	P14_ISGhi	DDX58
KLRB12	4.57541e-06	0.430955	0.768	0.51	0.0611687	P14_ISGhi	KLRB1
PSME21	4.81054e-06	0.421762	0.841	0.633	0.0643121	P14_ISGhi	PSME2
AKR1C31	5.1736e-06	0.50321	0.366	0.175	0.0691659	P14_ISGhi	AKR1C3
AOAH1	5.23261e-06	0.42298	0.427	0.228	0.0699547	P14_ISGhi	AOAH
DDX60L	5.29698e-06	0.482738	0.268	0.117	0.0708153	P14_ISGhi	DDX60L
ISG203	5.66625e-06	0.453541	0.744	0.584	0.0757521	P14_ISGhi	ISG20
APOBEC3G1	5.66767e-06	0.425984	0.683	0.453	0.0757711	P14_ISGhi	APOBEC3G
C19orf66	6.74027e-06	0.418661	0.463	0.258	0.0901106	P14_ISGhi	C19orf66
IRF11	7.13943e-06	0.460305	0.744	0.53	0.095447	P14_ISGhi	IRF1
CD300A2	9.38814e-06	0.360418	0.427	0.224	0.12551	P14_ISGhi	CD300A
IFITM32	1.19418e-05	0.631734	0.366	0.182	0.15965	P14_ISGhi	IFITM3
APOL6	1.36872e-05	0.49563	0.512	0.328	0.182984	P14_ISGhi	APOL6
WDR45	1.89771e-05	0.32734	0.329	0.158	0.253705	P14_ISGhi	WDR45
STAT2	2.02511e-05	0.35909	0.268	0.122	0.270737	P14_ISGhi	STAT2
TGFBR32	2.13273e-05	0.335159	0.39	0.203	0.285124	P14_ISGhi	TGFBR3
IRF9	2.5624e-05	0.383584	0.317	0.152	0.342567	P14_ISGhi	IRF9
PRSS231	2.77797e-05	0.403566	0.402	0.207	0.371386	P14_ISGhi	PRSS23
TTC381	3.0937e-05	0.359284	0.402	0.21	0.413597	P14_ISGhi	TTC38
CCL41	3.85516e-05	0.407244	0.659	0.451	0.515397	P14_ISGhi	CCL4
IL2RB2	4.74985e-05	0.468775	0.537	0.362	0.635007	P14_ISGhi	IL2RB
PSMB91	4.75707e-05	0.329204	0.854	0.696	0.635973	P14_ISGhi	PSMB9
PHF11	5.5851e-05	0.422203	0.451	0.275	0.746671	P14_ISGhi	PHF11
ZEB22	5.64131e-05	0.362097	0.524	0.336	0.754187	P14_ISGhi	ZEB2
S1PR51	0.000116031	0.336332	0.439	0.256	1	P14_ISGhi	S1PR5
SH2D1B2	0.000124967	0.340135	0.293	0.143	1	P14_ISGhi	SH2D1B
CEP781	0.000154215	0.390327	0.439	0.268	1	P14_ISGhi	CEP78
NKG72	0.000166615	0.32247	0.829	0.695	1	P14_ISGhi	NKG7
MAPK14	0.000169044	0.331294	0.256	0.124	1	P14_ISGhi	MAPK14
GBP53	0.000184986	0.417374	0.476	0.305	1	P14_ISGhi	GBP5
ALOX5AP1	0.000209964	0.3346	0.622	0.429	1	P14_ISGhi	ALOX5AP
BTN3A2	0.000280549	0.327492	0.61	0.421	1	P14_ISGhi	BTN3A2
MYBL12	0.000295249	0.376162	0.427	0.271	1	P14_ISGhi	MYBL1
STOM1	0.000347183	0.322678	0.463	0.288	1	P14_ISGhi	STOM
PARL	0.000403896	0.412405	0.256	0.131	1	P14_ISGhi	PARL
SHISA5	0.000417685	0.349713	0.5	0.328	1	P14_ISGhi	SHISA5
ZBP11	0.000436238	0.389958	0.268	0.141	1	P14_ISGhi	ZBP1
SPPL2A	0.000641256	0.349524	0.329	0.198	1	P14_ISGhi	SPPL2A
TAP11	0.000660096	0.387064	0.537	0.383	1	P14_ISGhi	TAP1
BHLHE401	0.000732345	0.328491	0.256	0.133	1	P14_ISGhi	BHLHE40
ARHGEF3	0.000793354	0.329954	0.427	0.279	1	P14_ISGhi	ARHGEF3
NCR32	0.00102695	0.325348	0.378	0.232	1	P14_ISGhi	NCR3
GBP22	0.0015926	0.355109	0.488	0.345	1	P14_ISGhi	GBP2
PYHIN11	0.00170531	0.34415	0.549	0.408	1	P14_ISGhi	PYHIN1
SOS2	0.00172278	0.323397	0.268	0.153	1	P14_ISGhi	SOS2
PPM1K	0.00183315	0.414996	0.354	0.228	1	P14_ISGhi	PPM1K
SP110	0.00331215	0.427734	0.5	0.356	1	P14_ISGhi	SP110
MSN1	0.00593819	0.341226	0.756	0.67	1	P14_ISGhi	MSN
IFITM12	0.0091128	0.574588	0.549	0.398	1	P14_ISGhi	IFITM1
GZMK	0	1.77422	0.813	0.161	0	P2_CD8+GZMK+	GZMK
CD8B	0	1.11353	0.665	0.165	0	P2_CD8+GZMK+	CD8B
DUSP2	0	0.937636	0.66	0.332	0	P2_CD8+GZMK+	DUSP2
CD8A	0	0.935957	0.674	0.22	0	P2_CD8+GZMK+	CD8A
HLA-DRB1	0	0.727942	0.547	0.27	0	P2_CD8+GZMK+	HLA-DRB1
LYAR	0	0.681959	0.694	0.381	0	P2_CD8+GZMK+	LYAR
CCL51	0	0.642631	0.956	0.634	0	P2_CD8+GZMK+	CCL5
HLA-DRA	0	0.626743	0.419	0.207	0	P2_CD8+GZMK+	HLA-DRA
CD74	0	0.615393	0.781	0.586	0	P2_CD8+GZMK+	CD74
HLA-DPB1	0	0.600112	0.701	0.427	0	P2_CD8+GZMK+	HLA-DPB1
HLA-DPA1	0	0.578276	0.59	0.341	0	P2_CD8+GZMK+	HLA-DPA1
CD84	0	0.577583	0.434	0.194	0	P2_CD8+GZMK+	CD84
COTL1	0	0.561891	0.669	0.38	0	P2_CD8+GZMK+	COTL1
HLA-DQB1	0	0.559826	0.276	0.1	0	P2_CD8+GZMK+	HLA-DQB1
TRAC	0	0.542647	0.818	0.505	0	P2_CD8+GZMK+	TRAC
CD27	0	0.488746	0.522	0.286	0	P2_CD8+GZMK+	CD27
CXCR4	0	0.472552	0.833	0.64	0	P2_CD8+GZMK+	CXCR4
CD3D	0	0.461036	0.904	0.573	0	P2_CD8+GZMK+	CD3D
CD2	0	0.428668	0.809	0.617	0	P2_CD8+GZMK+	CD2
CD3G	0	0.389263	0.763	0.487	0	P2_CD8+GZMK+	CD3G
IL32	0	0.335643	0.954	0.79	0	P2_CD8+GZMK+	IL32
THEMIS	8.88843e-262	0.42714	0.318	0.15	1.18829e-257	P2_CD8+GZMK+	THEMIS
SLF1	3.05425e-248	0.434758	0.277	0.125	4.08322e-244	P2_CD8+GZMK+	SLF1
SH2D1A	9.54035e-236	0.455462	0.431	0.252	1.27545e-231	P2_CD8+GZMK+	SH2D1A
TRGC2	1.9668e-222	0.447518	0.338	0.172	2.62942e-218	P2_CD8+GZMK+	TRGC2
ITGA4	3.57578e-219	0.440842	0.597	0.425	4.78047e-215	P2_CD8+GZMK+	ITGA4
KLRG1	2.98078e-210	0.423727	0.432	0.252	3.98501e-206	P2_CD8+GZMK+	KLRG1
ZFP36L2	6.83489e-207	0.328696	0.895	0.831	9.13756e-203	P2_CD8+GZMK+	ZFP36L2
PDCD4	8.23734e-188	0.375397	0.584	0.421	1.10125e-183	P2_CD8+GZMK+	PDCD4
TIGIT	8.82194e-175	0.36057	0.335	0.184	1.17941e-170	P2_CD8+GZMK+	TIGIT
CLEC2D	2.2063e-172	0.340999	0.623	0.461	2.9496e-168	P2_CD8+GZMK+	CLEC2D
IKZF3	4.30149e-161	0.359493	0.531	0.38	5.75066e-157	P2_CD8+GZMK+	IKZF3
NIN	1.44936e-156	0.382212	0.412	0.267	1.93765e-152	P2_CD8+GZMK+	NIN
STK17A	2.58079e-154	0.326328	0.654	0.518	3.45026e-150	P2_CD8+GZMK+	STK17A
MCUB	2.43741e-152	0.327117	0.477	0.321	3.25857e-148	P2_CD8+GZMK+	MCUB
TC2N	1.45664e-151	0.324562	0.43	0.279	1.94738e-147	P2_CD8+GZMK+	TC2N
JUN	1.01037e-145	0.396662	0.624	0.475	1.35076e-141	P2_CD8+GZMK+	JUN
ZBTB38	2.847e-129	0.335028	0.406	0.271	3.80615e-125	P2_CD8+GZMK+	ZBTB38
GBP5	2.51602e-127	0.377904	0.423	0.291	3.36367e-123	P2_CD8+GZMK+	GBP5
JUNB	1.15804e-126	0.35908	0.835	0.74	1.54819e-122	P2_CD8+GZMK+	JUNB
PIK3R1	1.96998e-111	0.322233	0.607	0.491	2.63367e-107	P2_CD8+GZMK+	PIK3R1
HERPUD1	1.92364e-101	0.335431	0.465	0.345	2.57172e-97	P2_CD8+GZMK+	HERPUD1
CMC11	1.82684e-95	0.422889	0.487	0.369	2.44231e-91	P2_CD8+GZMK+	CMC1
FCER1G	0	1.75146	0.82	0.153	0	P3_CTL	FCER1G
SPON2	0	1.74999	0.837	0.196	0	P3_CTL	SPON2
GZMB	0	1.72306	0.96	0.281	0	P3_CTL	GZMB
KLRF1	0	1.59938	0.857	0.146	0	P3_CTL	KLRF1
TYROBP	0	1.57849	0.956	0.23	0	P3_CTL	TYROBP
PRF1	0	1.54465	0.963	0.399	0	P3_CTL	PRF1
FCGR3A	0	1.51863	0.834	0.17	0	P3_CTL	FCGR3A
FGFBP2	0	1.50103	0.896	0.283	0	P3_CTL	FGFBP2
GNLY	0	1.49812	0.968	0.36	0	P3_CTL	GNLY
CLIC3	0	1.48439	0.749	0.184	0	P3_CTL	CLIC3
IGFBP7	0	1.39171	0.553	0.055	0	P3_CTL	IGFBP7
NKG7	0	1.22641	0.991	0.571	0	P3_CTL	NKG7
MYOM2	0	1.15423	0.323	0.052	0	P3_CTL	MYOM2
HOPX	0	1.15336	0.825	0.315	0	P3_CTL	HOPX
CCL4	0	1.13307	0.809	0.301	0	P3_CTL	CCL4
KLRD1	0	1.12359	0.915	0.333	0	P3_CTL	KLRD1
AKR1C3	0	1.11704	0.447	0.062	0	P3_CTL	AKR1C3
CD247	0	1.08257	0.9	0.543	0	P3_CTL	CD247
CX3CR1	0	1.07945	0.563	0.137	0	P3_CTL	CX3CR1
CST7	0	1.0776	0.961	0.504	0	P3_CTL	CST7
TRDC	0	1.06201	0.652	0.136	0	P3_CTL	TRDC
ADGRG1	0	1.0562	0.609	0.151	0	P3_CTL	ADGRG1
EFHD2	0	1.05132	0.801	0.38	0	P3_CTL	EFHD2
IL2RB	0	1.04838	0.665	0.236	0	P3_CTL	IL2RB
SH2D1B	0	1.02179	0.393	0.04	0	P3_CTL	SH2D1B
PRSS23	0	0.998324	0.475	0.096	0	P3_CTL	PRSS23
KLRB1	0	0.986683	0.863	0.363	0	P3_CTL	KLRB1
TTC38	0	0.978913	0.476	0.099	0	P3_CTL	TTC38
PLAC8	0	0.974265	0.836	0.423	0	P3_CTL	PLAC8
CD7	0	0.971089	0.882	0.547	0	P3_CTL	CD7
CTSW	0	0.959512	0.931	0.54	0	P3_CTL	CTSW
S1PR5	0	0.938446	0.539	0.138	0	P3_CTL	S1PR5
CCL3	0	0.915863	0.268	0.046	0	P3_CTL	CCL3
RHOC	0	0.904035	0.494	0.155	0	P3_CTL	RHOC
GZMA	0	0.893085	0.963	0.535	0	P3_CTL	GZMA
CD63	0	0.870194	0.802	0.453	0	P3_CTL	CD63
CD160	0	0.854551	0.355	0.085	0	P3_CTL	CD160
LAT2	0	0.833701	0.332	0.045	0	P3_CTL	LAT2
APMAP	0	0.811211	0.632	0.28	0	P3_CTL	APMAP
PTGDR	0	0.810143	0.474	0.145	0	P3_CTL	PTGDR
GNPTAB	0	0.810045	0.543	0.241	0	P3_CTL	GNPTAB
MATK	0	0.808337	0.657	0.277	0	P3_CTL	MATK
PLEK	0	0.804929	0.672	0.293	0	P3_CTL	PLEK
FGR	0	0.771829	0.466	0.14	0	P3_CTL	FGR
IFITM2	0	0.769462	0.906	0.683	0	P3_CTL	IFITM2
NCR3	0	0.756024	0.435	0.147	0	P3_CTL	NCR3
KLRC1	0	0.755487	0.349	0.11	0	P3_CTL	KLRC1
CXXC5	0	0.754892	0.341	0.07	0	P3_CTL	CXXC5
CD300A	0	0.750796	0.431	0.138	0	P3_CTL	CD300A
CTBP2	0	0.745457	0.322	0.055	0	P3_CTL	CTBP2
PTPN12	0	0.743535	0.385	0.12	0	P3_CTL	PTPN12
AREG	0	0.736354	0.275	0.073	0	P3_CTL	AREG
CHST2	0	0.732537	0.289	0.042	0	P3_CTL	CHST2
ITGB2	0	0.727576	0.923	0.728	0	P3_CTL	ITGB2
AOAH	0	0.724764	0.438	0.141	0	P3_CTL	AOAH
C1orf21	0	0.717608	0.456	0.146	0	P3_CTL	C1orf21
ZEB2	0	0.71357	0.567	0.24	0	P3_CTL	ZEB2
CEP78	0	0.699296	0.446	0.194	0	P3_CTL	CEP78
ID2	0	0.698102	0.805	0.499	0	P3_CTL	ID2
ABI3	0	0.695418	0.409	0.144	0	P3_CTL	ABI3
IFITM3	0	0.693395	0.304	0.132	0	P3_CTL	IFITM3
CYBA	0	0.672325	0.982	0.888	0	P3_CTL	CYBA
CTSD	0	0.668547	0.543	0.279	0	P3_CTL	CTSD
TMIGD2	0	0.653707	0.272	0.071	0	P3_CTL	TMIGD2
NCR1	0	0.649371	0.257	0.039	0	P3_CTL	NCR1
TXK	0	0.647594	0.512	0.243	0	P3_CTL	TXK
HAVCR2	0	0.646017	0.262	0.053	0	P3_CTL	HAVCR2
CMC1	0	0.644707	0.577	0.301	0	P3_CTL	CMC1
FCRL6	0	0.632654	0.392	0.133	0	P3_CTL	FCRL6
DDIT4	0	0.631872	0.713	0.476	0	P3_CTL	DDIT4
TBX21	0	0.631537	0.392	0.137	0	P3_CTL	TBX21
GSTP1	0	0.627516	0.77	0.517	0	P3_CTL	GSTP1
ABHD17A	0	0.626018	0.664	0.452	0	P3_CTL	ABHD17A
HSH2D	0	0.621171	0.304	0.091	0	P3_CTL	HSH2D
SRGN	0	0.620111	0.94	0.756	0	P3_CTL	SRGN
PLEKHF1	0	0.61297	0.355	0.132	0	P3_CTL	PLEKHF1
CD38	0	0.609818	0.258	0.061	0	P3_CTL	CD38
TFDP2	0	0.607643	0.409	0.182	0	P3_CTL	TFDP2
GZMH	0	0.606199	0.801	0.346	0	P3_CTL	GZMH
LYN	0	0.6033	0.304	0.069	0	P3_CTL	LYN
GZMM	0	0.599924	0.837	0.581	0	P3_CTL	GZMM
GSAP	0	0.595523	0.283	0.086	0	P3_CTL	GSAP
CHST12	0	0.593315	0.535	0.281	0	P3_CTL	CHST12
HIPK2	0	0.589412	0.324	0.119	0	P3_CTL	HIPK2
GK5	0	0.581946	0.312	0.114	0	P3_CTL	GK5
MCTP2	0	0.580417	0.325	0.109	0	P3_CTL	MCTP2
GPR65	0	0.56826	0.481	0.255	0	P3_CTL	GPR65
ASCL2	0	0.565642	0.277	0.077	0	P3_CTL	ASCL2
ZFP36	0	0.558519	0.592	0.411	0	P3_CTL	ZFP36
C1orf162	0	0.552057	0.529	0.294	0	P3_CTL	C1orf162
TPST2	0	0.549345	0.514	0.278	0	P3_CTL	TPST2
RAP1B	0	0.547993	0.866	0.701	0	P3_CTL	RAP1B
ITGAM	0	0.5399	0.301	0.094	0	P3_CTL	ITGAM
PYHIN1	0	0.539345	0.562	0.345	0	P3_CTL	PYHIN1
GNG2	0	0.536743	0.558	0.349	0	P3_CTL	GNG2
FAM49B	0	0.533254	0.685	0.475	0	P3_CTL	FAM49B
ALOX5AP	0	0.532917	0.576	0.368	0	P3_CTL	ALOX5AP
STARD3NL	0	0.529925	0.269	0.108	0	P3_CTL	STARD3NL
DOK2	0	0.523761	0.634	0.415	0	P3_CTL	DOK2
OSTF1	0	0.522407	0.638	0.427	0	P3_CTL	OSTF1
UBB	0	0.520769	0.938	0.814	0	P3_CTL	UBB
APOBEC3G	0	0.520486	0.616	0.385	0	P3_CTL	APOBEC3G
DHRS7	0	0.50905	0.612	0.403	0	P3_CTL	DHRS7
MAPK1	0	0.509042	0.457	0.273	0	P3_CTL	MAPK1
PLA2G16	0	0.507688	0.317	0.125	0	P3_CTL	PLA2G16
CTSC	0	0.497131	0.67	0.456	0	P3_CTL	CTSC
DBI	0	0.492696	0.746	0.559	0	P3_CTL	DBI
RUNX3	0	0.489946	0.576	0.383	0	P3_CTL	RUNX3
SYTL3	0	0.487355	0.393	0.195	0	P3_CTL	SYTL3
MYO1F	0	0.485908	0.699	0.471	0	P3_CTL	MYO1F
LAIR1	0	0.483883	0.282	0.122	0	P3_CTL	LAIR1
MAP3K8	0	0.483383	0.294	0.12	0	P3_CTL	MAP3K8
ARPC5L	0	0.483371	0.612	0.415	0	P3_CTL	ARPC5L
PFN1	0	0.481541	0.982	0.918	0	P3_CTL	PFN1
JAK1	0	0.480049	0.763	0.653	0	P3_CTL	JAK1
AGTRAP	0	0.474255	0.349	0.17	0	P3_CTL	AGTRAP
G6PD	0	0.470169	0.297	0.134	0	P3_CTL	G6PD
CEBPD	0	0.468163	0.296	0.102	0	P3_CTL	CEBPD
HDDC2	0	0.463559	0.412	0.253	0	P3_CTL	HDDC2
SH2D2A	0	0.457518	0.32	0.167	0	P3_CTL	SH2D2A
ZAP70	0	0.452485	0.559	0.378	0	P3_CTL	ZAP70
NDUFB2	0	0.451515	0.741	0.576	0	P3_CTL	NDUFB2
HCST	0	0.448107	0.953	0.84	0	P3_CTL	HCST
RASSF1	0	0.44513	0.426	0.247	0	P3_CTL	RASSF1
SERPINB6	0	0.444387	0.332	0.164	0	P3_CTL	SERPINB6
LPCAT1	0	0.443194	0.288	0.124	0	P3_CTL	LPCAT1
NDUFB7	0	0.442867	0.666	0.492	0	P3_CTL	NDUFB7
CCND3	0	0.442239	0.707	0.553	0	P3_CTL	CCND3
IGF2R	0	0.441345	0.361	0.213	0	P3_CTL	IGF2R
SASH3	0	0.441054	0.408	0.245	0	P3_CTL	SASH3
PPP1R18	0	0.437318	0.572	0.4	0	P3_CTL	PPP1R18
STOM	0	0.437171	0.416	0.235	0	P3_CTL	STOM
RIN3	0	0.436207	0.289	0.141	0	P3_CTL	RIN3
LITAF	0	0.435702	0.732	0.564	0	P3_CTL	LITAF
CISD3	0	0.435292	0.334	0.185	0	P3_CTL	CISD3
ADAM8	0	0.435129	0.313	0.159	0	P3_CTL	ADAM8
XBP1	0	0.429944	0.603	0.425	0	P3_CTL	XBP1
LSP1	0	0.424084	0.799	0.637	0	P3_CTL	LSP1
GLIPR2	0	0.421218	0.415	0.256	0	P3_CTL	GLIPR2
CD164	0	0.41927	0.628	0.476	0	P3_CTL	CD164
PRDX5	0	0.416636	0.556	0.407	0	P3_CTL	PRDX5
SAMD3	0	0.415739	0.541	0.367	0	P3_CTL	SAMD3
CLIC1	0	0.415583	0.893	0.745	0	P3_CTL	CLIC1
SLC9A3R1	0	0.415461	0.599	0.443	0	P3_CTL	SLC9A3R1
C12orf75	0	0.414411	0.599	0.394	0	P3_CTL	C12orf75
VAV3	0	0.41431	0.26	0.119	0	P3_CTL	VAV3
UBE2F	0	0.409759	0.305	0.17	0	P3_CTL	UBE2F
SPN	0	0.409645	0.557	0.407	0	P3_CTL	SPN
VASP	0	0.407991	0.479	0.326	0	P3_CTL	VASP
ARPC2	0	0.406927	0.944	0.854	0	P3_CTL	ARPC2
BSG	0	0.404386	0.49	0.34	0	P3_CTL	BSG
SLAMF7	0	0.403032	0.277	0.133	0	P3_CTL	SLAMF7
BIN2	0	0.401222	0.774	0.633	0	P3_CTL	BIN2
PXN	0	0.398064	0.363	0.22	0	P3_CTL	PXN
TGFBR3	0	0.392426	0.308	0.16	0	P3_CTL	TGFBR3
RARRES3	0	0.392312	0.841	0.699	0	P3_CTL	RARRES3
ADGRE5	0	0.381184	0.547	0.395	0	P3_CTL	ADGRE5
MSN	0	0.379805	0.755	0.635	0	P3_CTL	MSN
CCL5	0	0.378608	0.854	0.593	0	P3_CTL	CCL5
TSPAN32	0	0.375861	0.275	0.147	0	P3_CTL	TSPAN32
POLR2L	0	0.373178	0.636	0.505	0	P3_CTL	POLR2L
LGALS1	0	0.372942	0.652	0.439	0	P3_CTL	LGALS1
PTPRE	0	0.366907	0.332	0.188	0	P3_CTL	PTPRE
PDIA3	0	0.364932	0.726	0.604	0	P3_CTL	PDIA3
ACTB	0	0.364413	0.995	0.981	0	P3_CTL	ACTB
APLP2	0	0.363308	0.324	0.179	0	P3_CTL	APLP2
CFL1	0	0.359008	0.972	0.906	0	P3_CTL	CFL1
TGFB1	0	0.35867	0.616	0.47	0	P3_CTL	TGFB1
TCF25	0	0.358631	0.658	0.572	0	P3_CTL	TCF25
HMGN3	0	0.350937	0.501	0.36	0	P3_CTL	HMGN3
RAC2	0	0.347665	0.853	0.753	0	P3_CTL	RAC2
ACTN4	0	0.347517	0.467	0.319	0	P3_CTL	ACTN4
BST2	0	0.346546	0.535	0.406	0	P3_CTL	BST2
TPI1	0	0.340343	0.649	0.507	0	P3_CTL	TPI1
ITGAL	0	0.336311	0.496	0.36	0	P3_CTL	ITGAL
ARHGAP9	1.5375e-304	0.375936	0.398	0.265	2.05548e-300	P3_CTL	ARHGAP9
SYNE1	3.32095e-303	0.383958	0.549	0.431	4.43978e-299	P3_CTL	SYNE1
MYBL1	1.32745e-301	0.378894	0.369	0.23	1.77467e-297	P3_CTL	MYBL1
PTPN18	4.1553e-300	0.368923	0.328	0.2	5.55522e-296	P3_CTL	PTPN18
CARD16	7.06193e-298	0.357326	0.499	0.373	9.44109e-294	P3_CTL	CARD16
IFITM1	4.14533e-295	0.604858	0.498	0.356	5.54189e-291	P3_CTL	IFITM1
MAPRE2	9.74124e-291	0.374704	0.316	0.191	1.30231e-286	P3_CTL	MAPRE2
APOBEC3C	2.7982e-278	0.352198	0.385	0.255	3.74092e-274	P3_CTL	APOBEC3C
MIDN	6.73325e-274	0.326005	0.287	0.166	9.00168e-270	P3_CTL	MIDN
LY6E	5.88126e-272	0.336762	0.687	0.594	7.86265e-268	P3_CTL	LY6E
POLR2G	4.64056e-258	0.351522	0.378	0.26	6.20396e-254	P3_CTL	POLR2G
SDF4	9.65081e-256	0.351751	0.383	0.266	1.29022e-251	P3_CTL	SDF4
PSMB10	6.54764e-252	0.395518	0.406	0.284	8.75354e-248	P3_CTL	PSMB10
BANF1	1.49366e-247	0.354719	0.417	0.304	1.99687e-243	P3_CTL	BANF1
TES	3.16109e-242	0.328459	0.438	0.327	4.22607e-238	P3_CTL	TES
ARID5A	5.40616e-226	0.336961	0.275	0.167	7.22749e-222	P3_CTL	ARID5A
MIB2	7.20161e-217	0.357846	0.278	0.174	9.62784e-213	P3_CTL	MIB2
STMN1	0	2.68495	0.92	0.131	0	P4_Proliferating	STMN1
TUBA1B	0	2.26792	0.932	0.442	0	P4_Proliferating	TUBA1B
TYMS	0	2.02105	0.739	0.006	0	P4_Proliferating	TYMS
TUBB	0	2.00582	0.886	0.337	0	P4_Proliferating	TUBB
PCLAF	0	1.79097	0.654	0.012	0	P4_Proliferating	PCLAF
MKI67	0	1.7457	0.599	0.01	0	P4_Proliferating	MKI67
PCNA	0	1.65112	0.783	0.107	0	P4_Proliferating	PCNA
TK1	0	1.48439	0.587	0.005	0	P4_Proliferating	TK1
MCM7	0	1.45645	0.747	0.076	0	P4_Proliferating	MCM7
TOP2A	0	1.38905	0.501	0.01	0	P4_Proliferating	TOP2A
NUSAP1	0	1.373	0.555	0.015	0	P4_Proliferating	NUSAP1
CENPF	0	1.30368	0.455	0.017	0	P4_Proliferating	CENPF
PTTG1	0	1.30266	0.599	0.07	0	P4_Proliferating	PTTG1
BIRC5	0	1.27802	0.53	0.004	0	P4_Proliferating	BIRC5
RRM2	0	1.26523	0.475	0.008	0	P4_Proliferating	RRM2
MCM5	0	1.25891	0.72	0.081	0	P4_Proliferating	MCM5
FABP5	0	1.19512	0.608	0.092	0	P4_Proliferating	FABP5
CLSPN	0	1.18235	0.572	0.008	0	P4_Proliferating	CLSPN
CENPM	0	1.17355	0.604	0.026	0	P4_Proliferating	CENPM
UBE2C	0	1.15357	0.357	0.002	0	P4_Proliferating	UBE2C
CKS1B	0	1.14618	0.637	0.064	0	P4_Proliferating	CKS1B
MCM3	0	1.0972	0.701	0.122	0	P4_Proliferating	MCM3
ZWINT	0	1.03745	0.547	0.008	0	P4_Proliferating	ZWINT
FEN1	0	1.02044	0.591	0.039	0	P4_Proliferating	FEN1
SMC2	0	1.01557	0.638	0.087	0	P4_Proliferating	SMC2
GINS2	0	1.00129	0.52	0.007	0	P4_Proliferating	GINS2
ASF1B	0	0.993438	0.513	0.008	0	P4_Proliferating	ASF1B
CKS2	0	0.984482	0.504	0.046	0	P4_Proliferating	CKS2
HELLS	0	0.975671	0.56	0.083	0	P4_Proliferating	HELLS
DHFR	0	0.973465	0.576	0.04	0	P4_Proliferating	DHFR
CENPU	0	0.969695	0.521	0.014	0	P4_Proliferating	CENPU
LMNB1	0	0.964439	0.57	0.058	0	P4_Proliferating	LMNB1
MCM4	0	0.939189	0.525	0.027	0	P4_Proliferating	MCM4
H2AFX	0	0.927951	0.569	0.079	0	P4_Proliferating	H2AFX
ASPM	0	0.923955	0.311	0.005	0	P4_Proliferating	ASPM
TPX2	0	0.914356	0.426	0.009	0	P4_Proliferating	TPX2
TMEM106C	0	0.911067	0.598	0.081	0	P4_Proliferating	TMEM106C
CENPW	0	0.898249	0.491	0.01	0	P4_Proliferating	CENPW
MAD2L1	0	0.895746	0.53	0.048	0	P4_Proliferating	MAD2L1
CDKN3	0	0.895077	0.443	0.009	0	P4_Proliferating	CDKN3
MCM6	0	0.883337	0.545	0.045	0	P4_Proliferating	MCM6
CCNB2	0	0.786458	0.328	0.002	0	P4_Proliferating	CCNB2
RRM1	0	0.7808	0.55	0.07	0	P4_Proliferating	RRM1
CDK1	0	0.767748	0.343	0.003	0	P4_Proliferating	CDK1
CENPH	0	0.767092	0.506	0.041	0	P4_Proliferating	CENPH
CDCA7	0	0.762155	0.443	0.029	0	P4_Proliferating	CDCA7
PHF19	0	0.757461	0.559	0.079	0	P4_Proliferating	PHF19
UHRF1	0	0.751844	0.39	0.003	0	P4_Proliferating	UHRF1
MCM2	0	0.745676	0.438	0.012	0	P4_Proliferating	MCM2
CDT1	0	0.744613	0.397	0.004	0	P4_Proliferating	CDT1
EZH2	0	0.743839	0.487	0.067	0	P4_Proliferating	EZH2
UBE2T	0	0.735621	0.443	0.016	0	P4_Proliferating	UBE2T
LIG1	0	0.732564	0.542	0.071	0	P4_Proliferating	LIG1
CENPN	0	0.723126	0.411	0.01	0	P4_Proliferating	CENPN
DTYMK	0	0.71973	0.584	0.092	0	P4_Proliferating	DTYMK
GGH	0	0.717126	0.384	0.009	0	P4_Proliferating	GGH
CCNA2	0	0.708524	0.324	0.006	0	P4_Proliferating	CCNA2
CHEK1	0	0.707467	0.421	0.016	0	P4_Proliferating	CHEK1
AURKB	0	0.703268	0.341	0.003	0	P4_Proliferating	AURKB
CENPE	0	0.699038	0.324	0.016	0	P4_Proliferating	CENPE
GMNN	0	0.675538	0.458	0.029	0	P4_Proliferating	GMNN
WDR34	0	0.669622	0.407	0.009	0	P4_Proliferating	WDR34
TCF19	0	0.654239	0.384	0.015	0	P4_Proliferating	TCF19
BRCA2	0	0.652589	0.353	0.02	0	P4_Proliferating	BRCA2
SNRNP25	0	0.648737	0.492	0.062	0	P4_Proliferating	SNRNP25
HMGB3	0	0.646773	0.331	0.01	0	P4_Proliferating	HMGB3
ACOT7	0	0.645902	0.45	0.035	0	P4_Proliferating	ACOT7
BRCA1	0	0.614968	0.368	0.016	0	P4_Proliferating	BRCA1
FANCI	0	0.612511	0.392	0.023	0	P4_Proliferating	FANCI
CHAF1A	0	0.610173	0.399	0.03	0	P4_Proliferating	CHAF1A
GTSE1	0	0.607053	0.292	0.003	0	P4_Proliferating	GTSE1
RAD51AP1	0	0.588773	0.357	0.005	0	P4_Proliferating	RAD51AP1
KIFC1	0	0.586359	0.326	0.003	0	P4_Proliferating	KIFC1
KIF11	0	0.586161	0.284	0.01	0	P4_Proliferating	KIF11
CCNB1	0	0.585086	0.267	0.009	0	P4_Proliferating	CCNB1
CDCA5	0	0.582191	0.304	0.002	0	P4_Proliferating	CDCA5
WDR76	0	0.569311	0.445	0.053	0	P4_Proliferating	WDR76
FBXO5	0	0.56734	0.35	0.032	0	P4_Proliferating	FBXO5
RFC4	0	0.559079	0.45	0.058	0	P4_Proliferating	RFC4
CDCA8	0	0.543881	0.307	0.006	0	P4_Proliferating	CDCA8
CEP55	0	0.542292	0.278	0.003	0	P4_Proliferating	CEP55
CDC45	0	0.532858	0.304	0.001	0	P4_Proliferating	CDC45
SGO2	0	0.528816	0.319	0.027	0	P4_Proliferating	SGO2
CCDC34	0	0.526502	0.379	0.027	0	P4_Proliferating	CCDC34
MYBL2	0	0.512061	0.326	0.003	0	P4_Proliferating	MYBL2
NCAPG2	0	0.50967	0.343	0.021	0	P4_Proliferating	NCAPG2
ORC6	0	0.509232	0.319	0.009	0	P4_Proliferating	ORC6
RFC5	0	0.487742	0.345	0.032	0	P4_Proliferating	RFC5
KNL1	0	0.487593	0.251	0.007	0	P4_Proliferating	KNL1
NRM	0	0.481787	0.328	0.024	0	P4_Proliferating	NRM
NCAPH	0	0.46461	0.301	0.007	0	P4_Proliferating	NCAPH
RBBP8	0	0.458358	0.295	0.017	0	P4_Proliferating	RBBP8
PAQR4	0	0.456228	0.27	0.007	0	P4_Proliferating	PAQR4
E2F1	0	0.455206	0.28	0.003	0	P4_Proliferating	E2F1
NCAPG	0	0.454278	0.263	0.004	0	P4_Proliferating	NCAPG
NUF2	0	0.451059	0.299	0.01	0	P4_Proliferating	NUF2
CDCA7L	0	0.438222	0.333	0.023	0	P4_Proliferating	CDCA7L
SGO1	0	0.432786	0.267	0.005	0	P4_Proliferating	SGO1
CDK2	0	0.422409	0.304	0.019	0	P4_Proliferating	CDK2
PXMP2	0	0.412597	0.328	0.028	0	P4_Proliferating	PXMP2
FANCD2	0	0.407016	0.295	0.025	0	P4_Proliferating	FANCD2
CTNNAL1	0	0.404764	0.267	0.008	0	P4_Proliferating	CTNNAL1
TIMELESS	0	0.398444	0.29	0.015	0	P4_Proliferating	TIMELESS
RACGAP1	0	0.39591	0.267	0.017	0	P4_Proliferating	RACGAP1
DSN1	0	0.390861	0.324	0.026	0	P4_Proliferating	DSN1
TUBG1	0	0.377895	0.304	0.02	0	P4_Proliferating	TUBG1
SLC43A3	0	0.362808	0.255	0.017	0	P4_Proliferating	SLC43A3
FANCG	0	0.328556	0.255	0.018	0	P4_Proliferating	FANCG
IFI27L1	6.64145e-307	0.422564	0.336	0.035	8.87896e-303	P4_Proliferating	IFI27L1
DUT	2.23411e-303	1.54389	0.866	0.301	2.98678e-299	P4_Proliferating	DUT
RFC3	1.00857e-300	0.349048	0.261	0.022	1.34836e-296	P4_Proliferating	RFC3
LRR1	8.70432e-299	0.464685	0.36	0.04	1.16368e-294	P4_Proliferating	LRR1
SHMT1	3.98856e-295	0.337634	0.319	0.032	5.33231e-291	P4_Proliferating	SHMT1
RPA3	8.38411e-291	1.03296	0.752	0.19	1.12087e-286	P4_Proliferating	RPA3
ATAD5	2.22884e-290	0.618989	0.402	0.052	2.97973e-286	P4_Proliferating	ATAD5
RFC2	2.50174e-286	0.528351	0.465	0.066	3.34458e-282	P4_Proliferating	RFC2
ATAD2	2.58214e-286	0.911476	0.54	0.094	3.45206e-282	P4_Proliferating	ATAD2
C19orf48	2.24037e-282	0.524462	0.426	0.058	2.99515e-278	P4_Proliferating	C19orf48
NDC80	3.20856e-279	0.461593	0.323	0.035	4.28952e-275	P4_Proliferating	NDC80
HMGB2	1.02819e-277	1.91298	0.907	0.437	1.37458e-273	P4_Proliferating	HMGB2
DNAJC9	1.32222e-276	0.896277	0.703	0.161	1.76767e-272	P4_Proliferating	DNAJC9
KNTC1	3.67082e-275	0.34679	0.261	0.024	4.90751e-271	P4_Proliferating	KNTC1
NUDT1	1.92848e-274	0.910539	0.711	0.167	2.57818e-270	P4_Proliferating	NUDT1
SMC4	1.96732e-274	1.14145	0.698	0.169	2.63011e-270	P4_Proliferating	SMC4
HADH	7.62179e-267	0.461817	0.447	0.065	1.01896e-262	P4_Proliferating	HADH
HIRIP3	4.99192e-261	0.555961	0.489	0.078	6.6737e-257	P4_Proliferating	HIRIP3
CENPK	3.38532e-259	0.632355	0.55	0.097	4.52583e-255	P4_Proliferating	CENPK
KPNA2	6.19913e-250	0.691489	0.443	0.069	8.28761e-246	P4_Proliferating	KPNA2
UNG	5.11369e-249	0.606787	0.382	0.053	6.8365e-245	P4_Proliferating	UNG
MYL6B	2.56154e-246	0.336717	0.329	0.04	3.42452e-242	P4_Proliferating	MYL6B
CDKN2A	3.48558e-245	0.423229	0.338	0.042	4.65987e-241	P4_Proliferating	CDKN2A
SAE1	1.89434e-243	0.679625	0.616	0.125	2.53255e-239	P4_Proliferating	SAE1
NCAPH2	7.60146e-243	0.434878	0.392	0.055	1.01624e-238	P4_Proliferating	NCAPH2
TUBA1C	7.12697e-242	0.677432	0.462	0.077	9.52805e-238	P4_Proliferating	TUBA1C
H2AFZ	2.65356e-240	1.54417	0.922	0.537	3.54754e-236	P4_Proliferating	H2AFZ
SLBP	3.19559e-240	0.91819	0.711	0.184	4.27218e-236	P4_Proliferating	SLBP
BCL2L12	3.98612e-232	0.434689	0.387	0.056	5.32904e-228	P4_Proliferating	BCL2L12
HIST1H1B	9.05836e-231	1.88724	0.26	0.029	1.21101e-226	P4_Proliferating	HIST1H1B
CARHSP1	2.3726e-226	0.910601	0.744	0.209	3.17192e-222	P4_Proliferating	CARHSP1
PPIF	6.44698e-219	0.391715	0.317	0.041	8.61897e-215	P4_Proliferating	PPIF
HMGN2	8.1233e-218	1.3265	0.929	0.633	1.086e-213	P4_Proliferating	HMGN2
GAPDH	1.1386e-215	1.23201	0.981	0.878	1.52219e-211	P4_Proliferating	GAPDH
NASP	2.47904e-214	1.02413	0.812	0.291	3.31423e-210	P4_Proliferating	NASP
SPDL1	5.95065e-214	0.3709	0.251	0.027	7.95542e-210	P4_Proliferating	SPDL1
PAICS	5.38025e-212	0.511293	0.419	0.071	7.19285e-208	P4_Proliferating	PAICS
DDX39A	1.0243e-211	0.82403	0.727	0.205	1.36939e-207	P4_Proliferating	DDX39A
PTMA	1.04888e-211	0.701637	0.99	0.971	1.40225e-207	P4_Proliferating	PTMA
SAC3D1	4.23127e-211	0.420658	0.282	0.035	5.65679e-207	P4_Proliferating	SAC3D1
CDK4	1.21584e-206	0.548185	0.509	0.1	1.62546e-202	P4_Proliferating	CDK4
HMGA1	3.05714e-204	0.891108	0.637	0.169	4.0871e-200	P4_Proliferating	HMGA1
ACAT2	2.41413e-202	0.530434	0.523	0.106	3.22745e-198	P4_Proliferating	ACAT2
CDCA4	2.81313e-202	0.386541	0.336	0.049	3.76087e-198	P4_Proliferating	CDCA4
GGCT	9.09364e-195	0.557653	0.513	0.106	1.21573e-190	P4_Proliferating	GGCT
RANBP1	1.53409e-193	1.02236	0.798	0.313	2.05093e-189	P4_Proliferating	RANBP1
KIF22	2.37698e-193	0.643423	0.528	0.114	3.17778e-189	P4_Proliferating	KIF22
IDH2	5.41282e-190	0.965232	0.813	0.305	7.2364e-186	P4_Proliferating	IDH2
BARD1	1.40463e-188	0.328951	0.323	0.048	1.87786e-184	P4_Proliferating	BARD1
YEATS4	2.78052e-187	0.558334	0.523	0.114	3.71728e-183	P4_Proliferating	YEATS4
H2AFV	7.69725e-187	1.02993	0.851	0.423	1.02905e-182	P4_Proliferating	H2AFV
UBE2S	2.60658e-183	0.842296	0.518	0.122	3.48474e-179	P4_Proliferating	UBE2S
ITGB3BP	8.08609e-183	0.484297	0.43	0.081	1.08103e-178	P4_Proliferating	ITGB3BP
MRPL37	2.42504e-181	0.428061	0.453	0.089	3.24203e-177	P4_Proliferating	MRPL37
NABP2	2.81052e-181	0.418533	0.43	0.08	3.75739e-177	P4_Proliferating	NABP2
PRDX3	2.40251e-179	0.587441	0.545	0.127	3.21192e-175	P4_Proliferating	PRDX3
CENPX	3.98597e-178	0.70016	0.659	0.182	5.32884e-174	P4_Proliferating	CENPX
POLD3	1.10556e-177	0.369512	0.357	0.059	1.47802e-173	P4_Proliferating	POLD3
NCAPD3	6.26609e-176	0.411912	0.374	0.065	8.37713e-172	P4_Proliferating	NCAPD3
HPRT1	1.20271e-175	0.556453	0.564	0.134	1.6079e-171	P4_Proliferating	HPRT1
TFDP1	9.45949e-174	0.465818	0.441	0.089	1.26464e-169	P4_Proliferating	TFDP1
SHMT21	3.38941e-170	0.437722	0.46	0.095	4.5313e-166	P4_Proliferating	SHMT2
NSD2	3.63005e-168	0.418622	0.35	0.06	4.85302e-164	P4_Proliferating	NSD2
NCAPD2	3.86726e-168	0.387637	0.374	0.067	5.17014e-164	P4_Proliferating	NCAPD2
TUBB4B	8.39141e-168	1.12506	0.633	0.199	1.12185e-163	P4_Proliferating	TUBB4B
CCDC167	6.19935e-165	0.677536	0.71	0.215	8.28791e-161	P4_Proliferating	CCDC167
SKA2	6.18108e-164	0.583264	0.557	0.14	8.26349e-160	P4_Proliferating	SKA2
DCTPP1	1.96824e-163	0.541757	0.509	0.119	2.63134e-159	P4_Proliferating	DCTPP1
COX8A	1.36694e-162	0.858499	0.924	0.606	1.82746e-158	P4_Proliferating	COX8A
PMVK	1.88123e-162	0.57899	0.581	0.148	2.51502e-158	P4_Proliferating	PMVK
SSRP1	7.54481e-162	0.592849	0.628	0.174	1.00867e-157	P4_Proliferating	SSRP1
SMS	3.98088e-161	0.593276	0.606	0.16	5.32204e-157	P4_Proliferating	SMS
DEK	4.32346e-161	0.922982	0.893	0.534	5.78003e-157	P4_Proliferating	DEK
SLC25A5	4.60896e-158	0.996947	0.874	0.516	6.16171e-154	P4_Proliferating	SLC25A5
RAN	2.55819e-157	0.886335	0.915	0.598	3.42004e-153	P4_Proliferating	RAN
RUVBL2	6.65255e-157	0.349678	0.406	0.08	8.89379e-153	P4_Proliferating	RUVBL2
EBP	3.38236e-155	0.651844	0.691	0.212	4.52187e-151	P4_Proliferating	EBP
HMGB1	7.48822e-155	0.822677	0.966	0.87	1.0011e-150	P4_Proliferating	HMGB1
EIF4A3	4.07277e-154	0.52566	0.562	0.145	5.44489e-150	P4_Proliferating	EIF4A3
HAT1	7.71185e-153	0.558817	0.531	0.131	1.031e-148	P4_Proliferating	HAT1
CCDC28B	1.23928e-152	0.477654	0.47	0.106	1.65679e-148	P4_Proliferating	CCDC28B
RAD51C	5.79739e-152	0.3767	0.438	0.093	7.75052e-148	P4_Proliferating	RAD51C
ACTL6A	2.22543e-151	0.372458	0.43	0.091	2.97517e-147	P4_Proliferating	ACTL6A
NME1	5.67864e-149	0.58907	0.458	0.109	7.59177e-145	P4_Proliferating	NME1
POLD2	7.42372e-149	0.364698	0.418	0.088	9.92478e-145	P4_Proliferating	POLD2
CDKN2C	9.92289e-148	0.330521	0.284	0.046	1.32659e-143	P4_Proliferating	CDKN2C
LSM4	2.84261e-147	0.760366	0.774	0.31	3.80029e-143	P4_Proliferating	LSM4
PSMG1	5.76456e-144	0.348015	0.375	0.075	7.70664e-140	P4_Proliferating	PSMG1
MMS22L	1.08186e-142	0.355601	0.28	0.046	1.44634e-138	P4_Proliferating	MMS22L
FH	1.79215e-141	0.352103	0.404	0.086	2.39593e-137	P4_Proliferating	FH
DPP3	2.02638e-141	0.347645	0.338	0.064	2.70906e-137	P4_Proliferating	DPP3
SNRPD1	2.99255e-141	0.76861	0.801	0.337	4.00074e-137	P4_Proliferating	SNRPD1
SIVA1	4.61176e-140	0.79144	0.783	0.333	6.16546e-136	P4_Proliferating	SIVA1
LDHA	1.08806e-139	0.88165	0.89	0.549	1.45462e-135	P4_Proliferating	LDHA
TACC3	2.05093e-139	0.505911	0.443	0.106	2.74188e-135	P4_Proliferating	TACC3
HAUS1	3.23425e-139	0.397405	0.479	0.115	4.32387e-135	P4_Proliferating	HAUS1
CBX5	5.8575e-139	0.623432	0.63	0.195	7.8309e-135	P4_Proliferating	CBX5
USP1	8.71394e-139	0.700741	0.652	0.217	1.16497e-134	P4_Proliferating	USP1
DNMT1	8.98163e-139	0.745323	0.772	0.312	1.20075e-134	P4_Proliferating	DNMT1
UQCC2	3.7172e-138	0.47134	0.535	0.14	4.96953e-134	P4_Proliferating	UQCC2
H2AFY	1.89187e-137	0.720008	0.776	0.314	2.52924e-133	P4_Proliferating	H2AFY
PPIA	3.68795e-137	0.694668	0.975	0.849	4.93042e-133	P4_Proliferating	PPIA
MRPL12	7.38667e-135	0.402809	0.372	0.078	9.87524e-131	P4_Proliferating	MRPL12
CACYBP	9.05772e-135	0.681059	0.739	0.273	1.21093e-130	P4_Proliferating	CACYBP
ANP32B	1.57271e-134	0.778477	0.893	0.558	2.10256e-130	P4_Proliferating	ANP32B
VRK1	2.89236e-133	0.414159	0.487	0.122	3.8668e-129	P4_Proliferating	VRK1
MSH6	8.40137e-133	0.426052	0.389	0.086	1.12318e-128	P4_Proliferating	MSH6
CFL11	9.65459e-133	0.652858	0.976	0.925	1.29072e-128	P4_Proliferating	CFL1
POLR3K	2.7914e-132	0.356438	0.426	0.098	3.73182e-128	P4_Proliferating	POLR3K
SNRPB	6.78137e-132	0.780288	0.879	0.522	9.06602e-128	P4_Proliferating	SNRPB
CD381	7.43712e-129	0.53782	0.46	0.116	9.94268e-125	P4_Proliferating	CD38
TPI11	3.23832e-128	0.881323	0.895	0.545	4.32931e-124	P4_Proliferating	TPI1
MAD2L2	8.57244e-128	0.429841	0.535	0.144	1.14605e-123	P4_Proliferating	MAD2L2
TPGS2	1.25261e-127	0.39377	0.504	0.131	1.67461e-123	P4_Proliferating	TPGS2
ENO1	1.08172e-126	0.816082	0.913	0.659	1.44615e-122	P4_Proliferating	ENO1
COPS3	1.25561e-126	0.47377	0.567	0.161	1.67862e-122	P4_Proliferating	COPS3
RPA1	1.29128e-126	0.408479	0.55	0.15	1.72631e-122	P4_Proliferating	RPA1
CHCHD2	3.6999e-126	0.65039	0.927	0.79	4.9464e-122	P4_Proliferating	CHCHD2
THOC6	2.50027e-125	0.372475	0.377	0.082	3.34262e-121	P4_Proliferating	THOC6
KIF20B	3.59875e-125	0.410163	0.433	0.105	4.81117e-121	P4_Proliferating	KIF20B
ACTB1	1.5666e-124	0.770373	1	0.985	2.09439e-120	P4_Proliferating	ACTB
LRRC59	1.84942e-124	0.383549	0.423	0.101	2.47249e-120	P4_Proliferating	LRRC59
JPT1	8.10539e-123	0.810696	0.744	0.32	1.08361e-118	P4_Proliferating	JPT1
COX5A	9.37393e-123	0.730534	0.834	0.432	1.2532e-118	P4_Proliferating	COX5A
NUDT21	1.00852e-121	0.469827	0.576	0.17	1.34829e-117	P4_Proliferating	NUDT21
LSM5	4.63911e-121	0.638573	0.716	0.273	6.20203e-117	P4_Proliferating	LSM5
PRIM1	1.36511e-120	0.332919	0.351	0.076	1.82501e-116	P4_Proliferating	PRIM1
TXNDC17	2.64156e-119	0.61638	0.582	0.194	3.5315e-115	P4_Proliferating	TXNDC17
GUSB	3.77652e-118	0.398801	0.494	0.132	5.04883e-114	P4_Proliferating	GUSB
PFN11	5.90448e-118	0.747139	0.978	0.936	7.8937e-114	P4_Proliferating	PFN1
MRPL23	7.71682e-118	0.483484	0.469	0.126	1.03166e-113	P4_Proliferating	MRPL23
MAGOHB	6.45004e-117	0.374238	0.419	0.103	8.62306e-113	P4_Proliferating	MAGOHB
ARL6IP6	1.53904e-116	0.407434	0.436	0.11	2.05755e-112	P4_Proliferating	ARL6IP6
FDPS	2.46913e-115	0.559652	0.725	0.268	3.30098e-111	P4_Proliferating	FDPS
PSMC3	5.38219e-115	0.5685	0.706	0.252	7.19545e-111	P4_Proliferating	PSMC3
PSMB2	6.9328e-113	0.623942	0.728	0.294	9.26846e-109	P4_Proliferating	PSMB2
HINT2	4.54478e-112	0.447974	0.615	0.197	6.07591e-108	P4_Proliferating	HINT2
PGAM1	5.03335e-112	0.71648	0.81	0.402	6.72909e-108	P4_Proliferating	PGAM1
SNRPG	1.9817e-111	0.793809	0.798	0.418	2.64933e-107	P4_Proliferating	SNRPG
PSMA4	5.58306e-111	0.726379	0.781	0.374	7.46399e-107	P4_Proliferating	PSMA4
TALDO1	1.13052e-110	0.613517	0.766	0.333	1.51139e-106	P4_Proliferating	TALDO1
POP7	4.23772e-110	0.327616	0.462	0.123	5.66541e-106	P4_Proliferating	POP7
EBNA1BP2	9.16949e-109	0.354296	0.455	0.123	1.22587e-104	P4_Proliferating	EBNA1BP2
YWHAE	2.13024e-108	0.639302	0.64	0.243	2.84792e-104	P4_Proliferating	YWHAE
CYC1	4.58152e-108	0.540804	0.66	0.234	6.12504e-104	P4_Proliferating	CYC1
PSMD14	5.65851e-108	0.410846	0.569	0.176	7.56486e-104	P4_Proliferating	PSMD14
IMPDH2	7.349e-108	0.407575	0.513	0.15	9.82488e-104	P4_Proliferating	IMPDH2
PSME2	1.15409e-107	0.692167	0.92	0.63	1.5429e-103	P4_Proliferating	PSME2
MRPL17	1.79637e-106	0.325157	0.368	0.088	2.40156e-102	P4_Proliferating	MRPL17
SNRPE	5.91518e-106	0.659292	0.789	0.363	7.908e-102	P4_Proliferating	SNRPE
MRPL28	3.59835e-105	0.410463	0.548	0.167	4.81063e-101	P4_Proliferating	MRPL28
UQCRC1	1.0157e-102	0.469903	0.61	0.207	1.35789e-98	P4_Proliferating	UQCRC1
LAGE3	2.84849e-102	0.43679	0.531	0.162	3.80815e-98	P4_Proliferating	LAGE3
ILF2	4.02426e-102	0.500077	0.667	0.248	5.38004e-98	P4_Proliferating	ILF2
ANP32E	1.30481e-100	0.746105	0.73	0.341	1.7444e-96	P4_Proliferating	ANP32E
CALM31	7.61766e-100	0.722085	0.817	0.47	1.01841e-95	P4_Proliferating	CALM3
MRPL13	9.40481e-100	0.368947	0.477	0.139	1.25733e-95	P4_Proliferating	MRPL13
YBX1	2.35017e-99	0.572124	0.929	0.81	3.14194e-95	P4_Proliferating	YBX1
TIMM10	6.85078e-98	0.342537	0.496	0.148	9.15881e-94	P4_Proliferating	TIMM10
PSMA2	2.38302e-97	0.614973	0.66	0.272	3.18587e-93	P4_Proliferating	PSMA2
RBBP7	4.87251e-97	0.542785	0.716	0.288	6.51406e-93	P4_Proliferating	RBBP7
NUTF2	6.66677e-97	0.443457	0.606	0.204	8.91281e-93	P4_Proliferating	NUTF2
PPIH	6.93157e-97	0.331431	0.494	0.147	9.26682e-93	P4_Proliferating	PPIH
CORO1A	3.55793e-96	0.66482	0.956	0.873	4.75659e-92	P4_Proliferating	CORO1A
ZDHHC12	1.12234e-95	0.373003	0.516	0.162	1.50045e-91	P4_Proliferating	ZDHHC12
SPTSSA	1.40524e-95	0.330014	0.29	0.065	1.87866e-91	P4_Proliferating	SPTSSA
RALY	1.93272e-95	0.582046	0.788	0.36	2.58385e-91	P4_Proliferating	RALY
ACTG1	3.9861e-95	0.652297	0.978	0.932	5.32902e-91	P4_Proliferating	ACTG1
HDAC2	1.36611e-94	0.36604	0.453	0.131	1.82635e-90	P4_Proliferating	HDAC2
ANAPC11	1.99142e-94	0.584671	0.771	0.349	2.66232e-90	P4_Proliferating	ANAPC11
MSH2	3.47866e-94	0.336425	0.358	0.092	4.65062e-90	P4_Proliferating	MSH2
BANF11	1.16416e-93	0.534725	0.766	0.333	1.55637e-89	P4_Proliferating	BANF1
LSM3	2.909e-93	0.53671	0.757	0.355	3.88904e-89	P4_Proliferating	LSM3
STOML2	9.88944e-92	0.425616	0.569	0.194	1.32212e-87	P4_Proliferating	STOML2
PKM	1.8699e-91	0.702979	0.791	0.417	2.49986e-87	P4_Proliferating	PKM
MRPL51	2.04993e-90	0.587994	0.735	0.346	2.74055e-86	P4_Proliferating	MRPL51
RRP7A	5.25179e-90	0.396045	0.504	0.162	7.02111e-86	P4_Proliferating	RRP7A
TXN	1.78593e-89	0.675435	0.769	0.411	2.38761e-85	P4_Proliferating	TXN
UBE2A	2.24933e-89	0.340416	0.557	0.183	3.00712e-85	P4_Proliferating	UBE2A
UQCRQ	5.52256e-89	0.589834	0.829	0.448	7.38311e-85	P4_Proliferating	UQCRQ
SRSF2	8.44171e-89	0.58676	0.834	0.48	1.12857e-84	P4_Proliferating	SRSF2
YWHAH1	6.91808e-88	0.476127	0.511	0.172	9.24878e-84	P4_Proliferating	YWHAH
POMP	2.5031e-87	0.586263	0.84	0.475	3.3464e-83	P4_Proliferating	POMP
HSP90AA1	1.03585e-86	0.595006	0.944	0.806	1.38483e-82	P4_Proliferating	HSP90AA1
CCT2	1.31421e-86	0.47552	0.703	0.288	1.75697e-82	P4_Proliferating	CCT2
SNRPF	2.24503e-86	0.59409	0.779	0.42	3.00137e-82	P4_Proliferating	SNRPF
ITGB1BP1	2.67353e-86	0.474484	0.662	0.259	3.57425e-82	P4_Proliferating	ITGB1BP1
SNRPA	9.05164e-86	0.399865	0.511	0.169	1.21011e-81	P4_Proliferating	SNRPA
ANAPC15	1.59088e-85	0.367118	0.508	0.166	2.12684e-81	P4_Proliferating	ANAPC15
H3F3A	2.03938e-85	0.390628	0.98	0.931	2.72645e-81	P4_Proliferating	H3F3A
NAA38	9.87743e-85	0.498113	0.762	0.34	1.32051e-80	P4_Proliferating	NAA38
YWHAQ	1.16401e-84	0.562625	0.839	0.474	1.55617e-80	P4_Proliferating	YWHAQ
SLC25A11	6.70196e-84	0.33951	0.54	0.179	8.95985e-80	P4_Proliferating	SLC25A11
GLRX3	5.54852e-83	0.35182	0.525	0.173	7.41781e-79	P4_Proliferating	GLRX3
MDH1	1.18432e-82	0.468807	0.708	0.295	1.58332e-78	P4_Proliferating	MDH1
ACAA2	1.9975e-82	0.391568	0.594	0.217	2.67046e-78	P4_Proliferating	ACAA2
NHP2	2.76207e-82	0.464882	0.672	0.272	3.69261e-78	P4_Proliferating	NHP2
TOPBP1	4.17716e-82	0.369341	0.421	0.13	5.58444e-78	P4_Proliferating	TOPBP1
MRPL22	4.39801e-82	0.331117	0.511	0.169	5.87971e-78	P4_Proliferating	MRPL22
RNASEH2C	4.7477e-82	0.448445	0.689	0.277	6.3472e-78	P4_Proliferating	RNASEH2C
TMX1	5.23375e-82	0.336429	0.545	0.183	6.997e-78	P4_Proliferating	TMX1
TMEM109	1.41426e-81	0.375883	0.586	0.208	1.89072e-77	P4_Proliferating	TMEM109
ERH	1.66279e-81	0.526475	0.818	0.448	2.22299e-77	P4_Proliferating	ERH
COMMD4	2.05993e-81	0.401243	0.491	0.16	2.75392e-77	P4_Proliferating	COMMD4
BOLA3	3.29258e-81	0.333233	0.501	0.164	4.40184e-77	P4_Proliferating	BOLA3
CCT5	5.76489e-81	0.524141	0.694	0.314	7.70708e-77	P4_Proliferating	CCT5
MRPS16	8.89738e-81	0.360065	0.516	0.174	1.18949e-76	P4_Proliferating	MRPS16
FIBP	3.62928e-80	0.366621	0.615	0.224	4.85199e-76	P4_Proliferating	FIBP
NUCKS1	4.43929e-80	0.601282	0.835	0.532	5.93488e-76	P4_Proliferating	NUCKS1
CBX3	5.33072e-80	0.557021	0.791	0.428	7.12664e-76	P4_Proliferating	CBX3
AP2S1	9.17702e-80	0.4955	0.752	0.354	1.22688e-75	P4_Proliferating	AP2S1
TCP1	1.14961e-79	0.389791	0.64	0.251	1.53691e-75	P4_Proliferating	TCP1
PSMB3	1.39118e-79	0.543256	0.806	0.44	1.85987e-75	P4_Proliferating	PSMB3
SMC1A	1.75464e-79	0.518144	0.61	0.246	2.34578e-75	P4_Proliferating	SMC1A
EXOSC8	4.0519e-79	0.348314	0.491	0.163	5.41699e-75	P4_Proliferating	EXOSC8
VDAC3	7.62927e-79	0.433642	0.688	0.291	1.01996e-74	P4_Proliferating	VDAC3
NDUFB6	7.8867e-79	0.451278	0.62	0.242	1.05437e-74	P4_Proliferating	NDUFB6
NDUFA6	1.15188e-78	0.487553	0.737	0.339	1.53995e-74	P4_Proliferating	NDUFA6
SNRNP40	1.35819e-78	0.331492	0.521	0.177	1.81577e-74	P4_Proliferating	SNRNP40
LSM2	1.7e-78	0.435437	0.637	0.25	2.27273e-74	P4_Proliferating	LSM2
TMPO	1.72535e-78	0.733778	0.705	0.35	2.30662e-74	P4_Proliferating	TMPO
DBI1	1.05319e-77	0.516448	0.891	0.611	1.408e-73	P4_Proliferating	DBI
HSBP1	1.36303e-77	0.340005	0.472	0.156	1.82224e-73	P4_Proliferating	HSBP1
SMC3	1.52987e-77	0.577306	0.699	0.339	2.04528e-73	P4_Proliferating	SMC3
COX6A1	1.85728e-77	0.51845	0.905	0.64	2.483e-73	P4_Proliferating	COX6A1
MRPL11	2.5976e-77	0.375269	0.596	0.228	3.47273e-73	P4_Proliferating	MRPL11
POLR2E	8.35708e-77	0.400955	0.638	0.25	1.11726e-72	P4_Proliferating	POLR2E
PPP1CA	9.0852e-77	0.529085	0.915	0.637	1.2146e-72	P4_Proliferating	PPP1CA
HLA-DRA2	2.07348e-76	0.581106	0.557	0.228	2.77204e-72	P4_Proliferating	HLA-DRA
CLTA	6.38948e-76	0.495488	0.725	0.352	8.54209e-72	P4_Proliferating	CLTA
TPRKB	1.07229e-75	0.332442	0.528	0.183	1.43355e-71	P4_Proliferating	TPRKB
MRPL52	1.18429e-74	0.419853	0.667	0.28	1.58327e-70	P4_Proliferating	MRPL52
MEA1	1.37879e-74	0.340994	0.516	0.18	1.84331e-70	P4_Proliferating	MEA1
CDK2AP2	1.81168e-74	0.464123	0.672	0.284	2.42204e-70	P4_Proliferating	CDK2AP2
PTBP1	2.12342e-74	0.343246	0.598	0.226	2.8388e-70	P4_Proliferating	PTBP1
ANXA21	6.59208e-74	0.665822	0.789	0.458	8.81296e-70	P4_Proliferating	ANXA2
SUMO3	1.3852e-73	0.391181	0.666	0.267	1.85188e-69	P4_Proliferating	SUMO3
WDR1	1.78802e-73	0.51925	0.806	0.429	2.3904e-69	P4_Proliferating	WDR1
GSTP12	1.96123e-73	0.605447	0.876	0.589	2.62197e-69	P4_Proliferating	GSTP1
ADA	2.2793e-73	0.329919	0.453	0.151	3.04719e-69	P4_Proliferating	ADA
TPM41	2.29495e-73	0.543362	0.723	0.35	3.06811e-69	P4_Proliferating	TPM4
SEM1	5.21983e-73	0.538777	0.745	0.399	6.97839e-69	P4_Proliferating	SEM1
VDAC1	2.08934e-72	0.472076	0.674	0.3	2.79323e-68	P4_Proliferating	VDAC1
HSD17B10	9.34076e-72	0.322255	0.577	0.217	1.24877e-67	P4_Proliferating	HSD17B10
TIMM13	1.17921e-71	0.392147	0.56	0.212	1.57649e-67	P4_Proliferating	TIMM13
GSTO1	2.47678e-71	0.411696	0.688	0.3	3.31121e-67	P4_Proliferating	GSTO1
SMARCB1	2.6171e-71	0.327924	0.516	0.183	3.4988e-67	P4_Proliferating	SMARCB1
SLIRP	3.66979e-71	0.409305	0.581	0.231	4.90615e-67	P4_Proliferating	SLIRP
PSMD8	4.90101e-71	0.445399	0.808	0.434	6.55216e-67	P4_Proliferating	PSMD8
HMGN1	5.18964e-71	0.467605	0.915	0.649	6.93802e-67	P4_Proliferating	HMGN1
POLE3	6.80662e-71	0.392782	0.56	0.213	9.09977e-67	P4_Proliferating	POLE3
UFD1	2.47055e-70	0.402195	0.655	0.271	3.30287e-66	P4_Proliferating	UFD1
NDUFS6	9.16975e-70	0.468915	0.779	0.431	1.2259e-65	P4_Proliferating	NDUFS6
CXCR3	1.00451e-69	0.370733	0.328	0.097	1.34293e-65	P4_Proliferating	CXCR3
SUB1	1.03256e-69	0.532891	0.93	0.763	1.38043e-65	P4_Proliferating	SUB1
PSMA7	6.32285e-69	0.489756	0.895	0.683	8.45301e-65	P4_Proliferating	PSMA7
ADRM1	6.56512e-68	0.357921	0.649	0.268	8.77691e-64	P4_Proliferating	ADRM1
NDUFA9	1.48392e-67	0.324212	0.47	0.165	1.98385e-63	P4_Proliferating	NDUFA9
C12orf751	2.04209e-67	0.486925	0.815	0.451	2.73006e-63	P4_Proliferating	C12orf75
GTF3C6	2.85349e-67	0.448458	0.652	0.29	3.81483e-63	P4_Proliferating	GTF3C6
MYL6	1.02654e-66	0.39066	0.964	0.916	1.37238e-62	P4_Proliferating	MYL6
TIMM8B	3.9316e-66	0.344898	0.581	0.232	5.25615e-62	P4_Proliferating	TIMM8B
COX6C	4.60655e-66	0.436768	0.905	0.756	6.1585e-62	P4_Proliferating	COX6C
PSMB8	5.05985e-66	0.488871	0.876	0.611	6.76451e-62	P4_Proliferating	PSMB8
SNRPA1	1.02382e-65	0.33642	0.589	0.234	1.36875e-61	P4_Proliferating	SNRPA1
SDF2L1	1.27424e-65	0.381146	0.662	0.285	1.70353e-61	P4_Proliferating	SDF2L1
CPSF6	2.57821e-65	0.32403	0.501	0.181	3.44681e-61	P4_Proliferating	CPSF6
ARHGDIA	3.30373e-65	0.495465	0.817	0.46	4.41675e-61	P4_Proliferating	ARHGDIA
ELOC	6.04613e-65	0.362782	0.64	0.273	8.08308e-61	P4_Proliferating	ELOC
FKBP1A	1.22078e-64	0.458375	0.705	0.349	1.63206e-60	P4_Proliferating	FKBP1A
PSMB6	1.98784e-64	0.45566	0.752	0.392	2.65754e-60	P4_Proliferating	PSMB6
FKBP3	3.34737e-64	0.381507	0.545	0.213	4.4751e-60	P4_Proliferating	FKBP3
PPM1G	8.1284e-64	0.450466	0.747	0.386	1.08669e-59	P4_Proliferating	PPM1G
COX7B	1.09114e-63	0.49759	0.834	0.53	1.45875e-59	P4_Proliferating	COX7B
DCXR	1.95086e-63	0.34	0.61	0.245	2.6081e-59	P4_Proliferating	DCXR
RBX1	2.12039e-63	0.454663	0.803	0.466	2.83474e-59	P4_Proliferating	RBX1
HIST1H4C	2.99179e-63	1.5843	0.761	0.505	3.99972e-59	P4_Proliferating	HIST1H4C
PSMB9	3.04715e-63	0.46339	0.9	0.694	4.07373e-59	P4_Proliferating	PSMB9
MRPS15	7.9248e-63	0.340843	0.579	0.234	1.05947e-58	P4_Proliferating	MRPS15
PARK7	8.83378e-63	0.473602	0.871	0.643	1.18099e-58	P4_Proliferating	PARK7
PGK1	2.51268e-62	0.47395	0.813	0.48	3.35921e-58	P4_Proliferating	PGK1
RHEB	2.83392e-62	0.32714	0.545	0.213	3.78867e-58	P4_Proliferating	RHEB
NDUFAB1	5.11292e-62	0.405317	0.718	0.346	6.83547e-58	P4_Proliferating	NDUFAB1
PDCD5	6.91254e-62	0.404322	0.686	0.325	9.24138e-58	P4_Proliferating	PDCD5
PPP4C	1.06741e-61	0.371947	0.681	0.31	1.42702e-57	P4_Proliferating	PPP4C
DECR1	3.11658e-61	0.375585	0.652	0.288	4.16655e-57	P4_Proliferating	DECR1
NDUFB1	5.43905e-61	0.434462	0.749	0.392	7.27146e-57	P4_Proliferating	NDUFB1
NDUFB3	7.11088e-61	0.463777	0.667	0.319	9.50653e-57	P4_Proliferating	NDUFB3
UBE2N	8.82453e-61	0.376902	0.65	0.299	1.17975e-56	P4_Proliferating	UBE2N
GNG5	1.00909e-60	0.442726	0.83	0.481	1.34905e-56	P4_Proliferating	GNG5
PDIA6	1.17447e-60	0.453767	0.764	0.415	1.57015e-56	P4_Proliferating	PDIA6
CDC123	3.15524e-60	0.345483	0.55	0.219	4.21824e-56	P4_Proliferating	CDC123
ARPC21	4.36383e-60	0.374329	0.954	0.88	5.834e-56	P4_Proliferating	ARPC2
SRSF3	6.97489e-60	0.482891	0.856	0.623	9.32473e-56	P4_Proliferating	SRSF3
NONO	9.46693e-60	0.380096	0.744	0.365	1.26563e-55	P4_Proliferating	NONO
NUDC	1.64463e-59	0.370624	0.713	0.329	2.1987e-55	P4_Proliferating	NUDC
RPA2	3.32637e-59	0.383914	0.676	0.299	4.44702e-55	P4_Proliferating	RPA2
ANXA51	5.39927e-59	0.553845	0.581	0.29	7.21828e-55	P4_Proliferating	ANXA5
CYCS	6.06554e-59	0.42697	0.766	0.399	8.10902e-55	P4_Proliferating	CYCS
SLC25A3	7.13083e-59	0.447022	0.876	0.621	9.5332e-55	P4_Proliferating	SLC25A3
RNASEH2B	1.4115e-58	0.381596	0.662	0.302	1.88703e-54	P4_Proliferating	RNASEH2B
COX17	3.502e-58	0.388183	0.649	0.299	4.68182e-54	P4_Proliferating	COX17
BLOC1S1	4.48156e-58	0.399058	0.771	0.4	5.99139e-54	P4_Proliferating	BLOC1S1
HDAC1	4.80994e-58	0.380043	0.681	0.316	6.43041e-54	P4_Proliferating	HDAC1
PARP1	5.1123e-58	0.464104	0.696	0.35	6.83463e-54	P4_Proliferating	PARP1
NDUFA2	6.44639e-58	0.422018	0.757	0.404	8.61817e-54	P4_Proliferating	NDUFA2
DNAJC15	1.19202e-57	0.324181	0.577	0.239	1.59362e-53	P4_Proliferating	DNAJC15
UQCRH	1.6813e-57	0.435727	0.879	0.628	2.24772e-53	P4_Proliferating	UQCRH
SNRPD3	4.5334e-57	0.395165	0.754	0.396	6.06071e-53	P4_Proliferating	SNRPD3
XRCC6	9.07979e-57	0.412203	0.818	0.461	1.21388e-52	P4_Proliferating	XRCC6
SNRPC	1.63708e-56	0.323839	0.659	0.3	2.18861e-52	P4_Proliferating	SNRPC
TAGLN22	5.53657e-56	0.442689	0.857	0.562	7.40184e-52	P4_Proliferating	TAGLN2
CCT8	8.92423e-56	0.382983	0.688	0.347	1.19308e-51	P4_Proliferating	CCT8
TXNL4A	3.23441e-55	0.325081	0.598	0.258	4.32409e-51	P4_Proliferating	TXNL4A
CSNK2B	3.46794e-55	0.384881	0.599	0.272	4.63629e-51	P4_Proliferating	CSNK2B
COX7A2	4.88312e-55	0.427503	0.893	0.679	6.52824e-51	P4_Proliferating	COX7A2
NOP10	6.74254e-55	0.375345	0.735	0.369	9.0141e-51	P4_Proliferating	NOP10
ARPC5	7.87305e-55	0.437276	0.888	0.664	1.05255e-50	P4_Proliferating	ARPC5
CDC25B	8.32138e-55	0.344661	0.586	0.259	1.11249e-50	P4_Proliferating	CDC25B
PSMB7	1.15591e-54	0.363548	0.643	0.293	1.54533e-50	P4_Proliferating	PSMB7
NDUFB9	2.84646e-54	0.460806	0.784	0.471	3.80543e-50	P4_Proliferating	NDUFB9
PSMA3	5.13252e-54	0.393906	0.642	0.304	6.86167e-50	P4_Proliferating	PSMA3
DCTN3	2.43819e-53	0.372705	0.701	0.348	3.25961e-49	P4_Proliferating	DCTN3
ARHGDIB	5.43797e-53	0.411041	0.944	0.891	7.27002e-49	P4_Proliferating	ARHGDIB
EIF5A	6.41481e-53	0.444507	0.837	0.564	8.57596e-49	P4_Proliferating	EIF5A
ANP32A	8.9403e-53	0.402526	0.752	0.391	1.19523e-48	P4_Proliferating	ANP32A
POLR2L1	1.3219e-52	0.451468	0.835	0.54	1.76725e-48	P4_Proliferating	POLR2L
MZT2B	1.94669e-52	0.482708	0.82	0.574	2.60253e-48	P4_Proliferating	MZT2B
RAD21	1.99878e-52	0.466261	0.74	0.401	2.67217e-48	P4_Proliferating	RAD21
NDUFS8	2.76056e-52	0.344035	0.693	0.328	3.69059e-48	P4_Proliferating	NDUFS8
ARL6IP1	3.02133e-52	0.481434	0.613	0.285	4.03922e-48	P4_Proliferating	ARL6IP1
BSG1	6.30404e-52	0.365483	0.766	0.38	8.42788e-48	P4_Proliferating	BSG
MZT2A	9.81862e-52	0.395465	0.693	0.363	1.31265e-47	P4_Proliferating	MZT2A
PA2G4	1.01676e-51	0.422962	0.795	0.475	1.35931e-47	P4_Proliferating	PA2G4
GDI2	5.02147e-51	0.335082	0.706	0.366	6.71321e-47	P4_Proliferating	GDI2
IFI16	1.11013e-50	0.426599	0.796	0.48	1.48414e-46	P4_Proliferating	IFI16
PSMA5	1.57036e-50	0.403888	0.745	0.422	2.09941e-46	P4_Proliferating	PSMA5
PSMD7	5.25985e-50	0.35755	0.672	0.324	7.03189e-46	P4_Proliferating	PSMD7
SUPT16H	3.10625e-49	0.434075	0.635	0.321	4.15274e-45	P4_Proliferating	SUPT16H
CCT4	5.19699e-49	0.344474	0.666	0.331	6.94785e-45	P4_Proliferating	CCT4
CD99	3.15009e-48	0.35391	0.941	0.729	4.21135e-44	P4_Proliferating	CD99
NUCB2	3.63535e-48	0.392678	0.669	0.333	4.8601e-44	P4_Proliferating	NUCB2
BUB3	1.116e-47	0.366826	0.727	0.378	1.49198e-43	P4_Proliferating	BUB3
RNPS1	1.1547e-47	0.337615	0.757	0.393	1.54372e-43	P4_Proliferating	RNPS1
AURKAIP1	1.18038e-47	0.358713	0.752	0.412	1.57805e-43	P4_Proliferating	AURKAIP1
ARPC1B	1.30762e-47	0.456805	0.876	0.648	1.74815e-43	P4_Proliferating	ARPC1B
CKLF	1.52808e-47	0.349513	0.681	0.345	2.04289e-43	P4_Proliferating	CKLF
CCT7	5.26816e-47	0.323387	0.683	0.341	7.04301e-43	P4_Proliferating	CCT7
NDUFB11	2.50115e-46	0.390404	0.839	0.541	3.34379e-42	P4_Proliferating	NDUFB11
PIN1	4.65176e-46	0.328588	0.669	0.32	6.21894e-42	P4_Proliferating	PIN1
PSMC5	8.69371e-46	0.34998	0.776	0.434	1.16226e-41	P4_Proliferating	PSMC5
UBE2L3	9.03345e-46	0.40126	0.761	0.468	1.20768e-41	P4_Proliferating	UBE2L3
PSMA1	1.66858e-45	0.355371	0.713	0.376	2.23072e-41	P4_Proliferating	PSMA1
PRDX11	2.11379e-45	0.565949	0.649	0.389	2.82593e-41	P4_Proliferating	PRDX1
CD743	2.78816e-45	0.46008	0.854	0.605	3.7275e-41	P4_Proliferating	CD74
RBM3	6.89049e-45	0.376067	0.883	0.65	9.21189e-41	P4_Proliferating	RBM3
SRP9	9.14484e-45	0.342061	0.783	0.46	1.22257e-40	P4_Proliferating	SRP9
CALR	1.93682e-44	0.442895	0.89	0.626	2.58933e-40	P4_Proliferating	CALR
P4HB	2.17155e-44	0.335953	0.805	0.46	2.90314e-40	P4_Proliferating	P4HB
NDUFC2	2.47695e-44	0.359764	0.694	0.378	3.31144e-40	P4_Proliferating	NDUFC2
LSM7	1.00329e-43	0.349943	0.771	0.466	1.3413e-39	P4_Proliferating	LSM7
CLIC11	2.13245e-43	0.323906	0.927	0.787	2.85087e-39	P4_Proliferating	CLIC1
SRSF10	2.14114e-43	0.362097	0.72	0.393	2.86249e-39	P4_Proliferating	SRSF10
BAX	2.72916e-43	0.33242	0.752	0.401	3.64862e-39	P4_Proliferating	BAX
EIF3I	4.25689e-43	0.334007	0.706	0.383	5.69103e-39	P4_Proliferating	EIF3I
SUMO1	4.26496e-43	0.330451	0.759	0.424	5.70183e-39	P4_Proliferating	SUMO1
CCT6A	7.72208e-43	0.332065	0.664	0.344	1.03236e-38	P4_Proliferating	CCT6A
NDUFA13	4.44714e-42	0.333823	0.716	0.397	5.94538e-38	P4_Proliferating	NDUFA13
RTRAF	4.66825e-42	0.367862	0.735	0.429	6.24099e-38	P4_Proliferating	RTRAF
C1QBP	6.89137e-42	0.384803	0.693	0.386	9.21307e-38	P4_Proliferating	C1QBP
HLA-DRB13	1.46695e-41	0.494398	0.56	0.298	1.96117e-37	P4_Proliferating	HLA-DRB1
COX6B1	3.00779e-41	0.349088	0.912	0.715	4.02111e-37	P4_Proliferating	COX6B1
LGALS12	3.13704e-41	0.807504	0.776	0.499	4.19391e-37	P4_Proliferating	LGALS1
RHOA	1.36384e-40	0.353365	0.9	0.676	1.82332e-36	P4_Proliferating	RHOA
CRIP1	1.20975e-39	0.43771	0.632	0.333	1.61731e-35	P4_Proliferating	CRIP1
EIF2S2	1.46115e-39	0.338263	0.728	0.418	1.95341e-35	P4_Proliferating	EIF2S2
COTL13	1.97302e-39	0.80673	0.621	0.41	2.63773e-35	P4_Proliferating	COTL1
RAC21	1.03748e-38	0.331399	0.925	0.781	1.38701e-34	P4_Proliferating	RAC2
NAP1L1	1.391e-38	0.354587	0.83	0.582	1.85962e-34	P4_Proliferating	NAP1L1
ARPC41	1.52222e-38	0.377437	0.723	0.431	2.03506e-34	P4_Proliferating	ARPC4
NDUFB4	3.04824e-38	0.333621	0.767	0.48	4.07519e-34	P4_Proliferating	NDUFB4
CALM2	7.70968e-38	0.398256	0.878	0.668	1.03071e-33	P4_Proliferating	CALM2
NDUFV2	8.22291e-38	0.330018	0.677	0.39	1.09932e-33	P4_Proliferating	NDUFV2
DYNLL1	1.25123e-37	0.376931	0.756	0.466	1.67277e-33	P4_Proliferating	DYNLL1
NDUFB21	5.31147e-37	0.322606	0.852	0.622	7.1009e-33	P4_Proliferating	NDUFB2
PSMB1	9.67824e-37	0.330629	0.835	0.587	1.29388e-32	P4_Proliferating	PSMB1
ABRACL	2.63522e-36	0.346844	0.747	0.456	3.52302e-32	P4_Proliferating	ABRACL
LY6E1	7.71668e-36	0.328536	0.873	0.619	1.03164e-31	P4_Proliferating	LY6E
SERBP1	8.0065e-36	0.345565	0.847	0.628	1.07039e-31	P4_Proliferating	SERBP1
MIF	2.91945e-35	0.431865	0.718	0.418	3.90301e-31	P4_Proliferating	MIF
PRDX2	6.18236e-35	0.332207	0.706	0.438	8.2652e-31	P4_Proliferating	PRDX2
GBP1	2.94106e-34	0.344692	0.477	0.233	3.9319e-30	P4_Proliferating	GBP1
LBR	7.36382e-34	0.32999	0.679	0.382	9.84469e-30	P4_Proliferating	LBR
VIM2	2.73424e-33	0.427927	0.912	0.784	3.65541e-29	P4_Proliferating	VIM
XRCC5	1.62246e-31	0.326367	0.82	0.575	2.16907e-27	P4_Proliferating	XRCC5
UBB1	1.34443e-28	0.334055	0.951	0.85	1.79737e-24	P4_Proliferating	UBB
SET	2.0442e-27	0.348287	0.846	0.639	2.73289e-23	P4_Proliferating	SET
IGFBP72	3.26413e-26	0.335626	0.385	0.199	4.36382e-22	P4_Proliferating	IGFBP7
CNN2	2.4772e-23	0.365724	0.635	0.423	3.31177e-19	P4_Proliferating	CNN2
HIST1H1C	4.01879e-18	0.686806	0.496	0.312	5.37272e-14	P4_Proliferating	HIST1H1C
HIST2H2AC	7.16361e-17	0.389356	0.423	0.247	9.57703e-13	P4_Proliferating	HIST2H2AC
HIST1H1D	0.00256103	0.614373	0.48	0.418	1	P4_Proliferating	HIST1H1D
LTB3	0	1.37275	0.942	0.459	0	P5_CD4+LTB+IL7R+	LTB
IL7R2	0	1.16719	0.897	0.383	0	P5_CD4+LTB+IL7R+	IL7R
BIRC31	0	0.896746	0.55	0.16	0	P5_CD4+LTB+IL7R+	BIRC3
MAL1	0	0.876329	0.503	0.111	0	P5_CD4+LTB+IL7R+	MAL
AQP33	0	0.873842	0.476	0.118	0	P5_CD4+LTB+IL7R+	AQP3
TRAT1	0	0.85644	0.595	0.167	0	P5_CD4+LTB+IL7R+	TRAT1
VIM3	0	0.851948	0.95	0.744	0	P5_CD4+LTB+IL7R+	VIM
INPP4B	0	0.812477	0.522	0.146	0	P5_CD4+LTB+IL7R+	INPP4B
CDC14A	0	0.778875	0.576	0.214	0	P5_CD4+LTB+IL7R+	CDC14A
PLP21	0	0.777896	0.611	0.228	0	P5_CD4+LTB+IL7R+	PLP2
GPR1831	0	0.774851	0.482	0.128	0	P5_CD4+LTB+IL7R+	GPR183
TRADD	0	0.77135	0.614	0.24	0	P5_CD4+LTB+IL7R+	TRADD
RCAN32	0	0.764844	0.585	0.177	0	P5_CD4+LTB+IL7R+	RCAN3
CD41	0	0.763192	0.415	0.067	0	P5_CD4+LTB+IL7R+	CD4
CD40LG	0	0.750854	0.367	0.049	0	P5_CD4+LTB+IL7R+	CD40LG
CORO1B1	0	0.720793	0.546	0.217	0	P5_CD4+LTB+IL7R+	CORO1B
LDHB2	0	0.712355	0.902	0.6	0	P5_CD4+LTB+IL7R+	LDHB
ITGB11	0	0.692309	0.769	0.498	0	P5_CD4+LTB+IL7R+	ITGB1
MDFIC	0	0.6915	0.5	0.186	0	P5_CD4+LTB+IL7R+	MDFIC
LPAR6	0	0.680192	0.416	0.13	0	P5_CD4+LTB+IL7R+	LPAR6
PAG12	0	0.670149	0.546	0.217	0	P5_CD4+LTB+IL7R+	PAG1
RNASET21	0	0.656137	0.707	0.358	0	P5_CD4+LTB+IL7R+	RNASET2
BCL2	0	0.649107	0.543	0.24	0	P5_CD4+LTB+IL7R+	BCL2
TPT1	0	0.639384	0.996	0.983	0	P5_CD4+LTB+IL7R+	TPT1
TMEM123	0	0.629767	0.705	0.34	0	P5_CD4+LTB+IL7R+	TMEM123
KLF6	0	0.6275	0.777	0.495	0	P5_CD4+LTB+IL7R+	KLF6
LIMS12	0	0.627254	0.438	0.185	0	P5_CD4+LTB+IL7R+	LIMS1
TCF73	0	0.618082	0.655	0.29	0	P5_CD4+LTB+IL7R+	TCF7
NOSIP1	0	0.599688	0.69	0.392	0	P5_CD4+LTB+IL7R+	NOSIP
TTC39C2	0	0.598536	0.552	0.244	0	P5_CD4+LTB+IL7R+	TTC39C
CYLD1	0	0.597211	0.672	0.375	0	P5_CD4+LTB+IL7R+	CYLD
SERINC5	0	0.594258	0.4	0.115	0	P5_CD4+LTB+IL7R+	SERINC5
CISH	0	0.580451	0.258	0.086	0	P5_CD4+LTB+IL7R+	CISH
CD282	0	0.576042	0.351	0.094	0	P5_CD4+LTB+IL7R+	CD28
CD82	0	0.575988	0.307	0.065	0	P5_CD4+LTB+IL7R+	CD82
COTL15	0	0.571606	0.709	0.338	0	P5_CD4+LTB+IL7R+	COTL1
ARID5B2	0	0.5705	0.543	0.247	0	P5_CD4+LTB+IL7R+	ARID5B
S100A111	0	0.56691	0.831	0.565	0	P5_CD4+LTB+IL7R+	S100A11
AP3M2	0	0.564481	0.307	0.08	0	P5_CD4+LTB+IL7R+	AP3M2
IL6R1	0	0.554852	0.289	0.053	0	P5_CD4+LTB+IL7R+	IL6R
MAP3K11	0	0.55276	0.361	0.119	0	P5_CD4+LTB+IL7R+	MAP3K1
MAF	0	0.550686	0.35	0.14	0	P5_CD4+LTB+IL7R+	MAF
DGKA3	0	0.540499	0.485	0.194	0	P5_CD4+LTB+IL7R+	DGKA
PBXIP12	0	0.536837	0.618	0.308	0	P5_CD4+LTB+IL7R+	PBXIP1
GSTK12	0	0.533144	0.825	0.561	0	P5_CD4+LTB+IL7R+	GSTK1
LEF12	0	0.527587	0.468	0.172	0	P5_CD4+LTB+IL7R+	LEF1
IL6ST	0	0.525265	0.35	0.123	0	P5_CD4+LTB+IL7R+	IL6ST
TNFRSF4	0	0.523775	0.256	0.057	0	P5_CD4+LTB+IL7R+	TNFRSF4
SUSD31	0	0.515432	0.32	0.087	0	P5_CD4+LTB+IL7R+	SUSD3
TNFRSF252	0	0.51113	0.375	0.123	0	P5_CD4+LTB+IL7R+	TNFRSF25
MYC1	0	0.50849	0.329	0.113	0	P5_CD4+LTB+IL7R+	MYC
HINT1	0	0.504644	0.924	0.764	0	P5_CD4+LTB+IL7R+	HINT1
FYB11	0	0.503952	0.865	0.658	0	P5_CD4+LTB+IL7R+	FYB1
TRABD2A1	0	0.493483	0.34	0.106	0	P5_CD4+LTB+IL7R+	TRABD2A
TNFSF10	0	0.482078	0.39	0.168	0	P5_CD4+LTB+IL7R+	TNFSF10
S100A102	0	0.479629	0.896	0.734	0	P5_CD4+LTB+IL7R+	S100A10
FXYD52	0	0.474032	0.84	0.617	0	P5_CD4+LTB+IL7R+	FXYD5
CRYBG1	0	0.473373	0.431	0.213	0	P5_CD4+LTB+IL7R+	CRYBG1
NPDC1	0	0.462373	0.259	0.074	0	P5_CD4+LTB+IL7R+	NPDC1
CD53	0	0.460382	0.326	0.125	0	P5_CD4+LTB+IL7R+	CD5
TNFSF8	0	0.460006	0.294	0.094	0	P5_CD4+LTB+IL7R+	TNFSF8
USP10	0	0.456785	0.31	0.134	0	P5_CD4+LTB+IL7R+	USP10
ARHGAP15	0	0.456547	0.647	0.384	0	P5_CD4+LTB+IL7R+	ARHGAP15
CD842	0	0.454241	0.403	0.175	0	P5_CD4+LTB+IL7R+	CD84
TESPA11	0	0.453438	0.387	0.159	0	P5_CD4+LTB+IL7R+	TESPA1
CAMK41	0	0.45263	0.414	0.167	0	P5_CD4+LTB+IL7R+	CAMK4
CD523	0	0.450748	0.967	0.793	0	P5_CD4+LTB+IL7R+	CD52
SESN31	0	0.448949	0.256	0.086	0	P5_CD4+LTB+IL7R+	SESN3
THOC3	0	0.445939	0.343	0.134	0	P5_CD4+LTB+IL7R+	THOC3
EIF3E	0	0.44557	0.839	0.611	0	P5_CD4+LTB+IL7R+	EIF3E
KLF2	0	0.444745	0.849	0.681	0	P5_CD4+LTB+IL7R+	KLF2
EEF1A1	0	0.442256	0.999	0.997	0	P5_CD4+LTB+IL7R+	EEF1A1
EEF1B2	0	0.441772	0.956	0.888	0	P5_CD4+LTB+IL7R+	EEF1B2
FLT3LG1	0	0.438661	0.358	0.164	0	P5_CD4+LTB+IL7R+	FLT3LG
RGCC1	0	0.435903	0.272	0.088	0	P5_CD4+LTB+IL7R+	RGCC
TIMP11	0	0.434677	0.487	0.243	0	P5_CD4+LTB+IL7R+	TIMP1
SPOCK23	0	0.429002	0.661	0.365	0	P5_CD4+LTB+IL7R+	SPOCK2
FKBP5	0	0.427994	0.479	0.259	0	P5_CD4+LTB+IL7R+	FKBP5
PPP1R2	0	0.424969	0.643	0.39	0	P5_CD4+LTB+IL7R+	PPP1R2
TNFAIP31	0	0.423414	0.519	0.322	0	P5_CD4+LTB+IL7R+	TNFAIP3
AHNAK	0	0.420631	0.79	0.591	0	P5_CD4+LTB+IL7R+	AHNAK
FAM102A2	0	0.420131	0.34	0.128	0	P5_CD4+LTB+IL7R+	FAM102A
NAP1L12	0	0.413459	0.785	0.535	0	P5_CD4+LTB+IL7R+	NAP1L1
GATA31	0	0.406464	0.371	0.191	0	P5_CD4+LTB+IL7R+	GATA3
CFAP36	0	0.40529	0.274	0.095	0	P5_CD4+LTB+IL7R+	CFAP36
ANXA52	0	0.404822	0.493	0.244	0	P5_CD4+LTB+IL7R+	ANXA5
PHTF21	0	0.404401	0.275	0.094	0	P5_CD4+LTB+IL7R+	PHTF2
NPM1	0	0.403709	0.927	0.818	0	P5_CD4+LTB+IL7R+	NPM1
CD443	0	0.402615	0.73	0.457	0	P5_CD4+LTB+IL7R+	CD44
TRAC5	0	0.401835	0.816	0.471	0	P5_CD4+LTB+IL7R+	TRAC
TOB12	0	0.400212	0.403	0.211	0	P5_CD4+LTB+IL7R+	TOB1
PIK3IP13	0	0.395283	0.651	0.387	0	P5_CD4+LTB+IL7R+	PIK3IP1
PPA11	0	0.393227	0.512	0.282	0	P5_CD4+LTB+IL7R+	PPA1
TAGAP	0	0.387991	0.525	0.311	0	P5_CD4+LTB+IL7R+	TAGAP
ANXA1	0	0.385786	0.832	0.697	0	P5_CD4+LTB+IL7R+	ANXA1
SH3YL1	0	0.385645	0.331	0.143	0	P5_CD4+LTB+IL7R+	SH3YL1
TNFAIP8	0	0.385108	0.657	0.425	0	P5_CD4+LTB+IL7R+	TNFAIP8
ITK1	0	0.382603	0.495	0.28	0	P5_CD4+LTB+IL7R+	ITK
NSD31	0	0.382226	0.651	0.414	0	P5_CD4+LTB+IL7R+	NSD3
PABPC1	0	0.380338	0.929	0.817	0	P5_CD4+LTB+IL7R+	PABPC1
ANKRD12	0	0.374438	0.776	0.58	0	P5_CD4+LTB+IL7R+	ANKRD12
PLEC1	0	0.372801	0.294	0.127	0	P5_CD4+LTB+IL7R+	PLEC
SARAF1	0	0.370834	0.907	0.755	0	P5_CD4+LTB+IL7R+	SARAF
MCUB2	0	0.370467	0.534	0.29	0	P5_CD4+LTB+IL7R+	MCUB
PRKCA	0	0.370456	0.288	0.112	0	P5_CD4+LTB+IL7R+	PRKCA
SIT12	0	0.370449	0.361	0.158	0	P5_CD4+LTB+IL7R+	SIT1
EIF4B	0	0.367999	0.767	0.562	0	P5_CD4+LTB+IL7R+	EIF4B
NCK21	0	0.366162	0.387	0.19	0	P5_CD4+LTB+IL7R+	NCK2
THEM41	0	0.364499	0.324	0.144	0	P5_CD4+LTB+IL7R+	THEM4
ZFAS1	0	0.363877	0.763	0.527	0	P5_CD4+LTB+IL7R+	ZFAS1
RACK1	0	0.363867	0.98	0.946	0	P5_CD4+LTB+IL7R+	RACK1
JUND	0	0.362999	0.685	0.489	0	P5_CD4+LTB+IL7R+	JUND
BCL11B	0	0.362909	0.503	0.284	0	P5_CD4+LTB+IL7R+	BCL11B
STT3B	0	0.362282	0.412	0.225	0	P5_CD4+LTB+IL7R+	STT3B
GPRIN3	0	0.360118	0.387	0.211	0	P5_CD4+LTB+IL7R+	GPRIN3
TOMM20	0	0.35992	0.685	0.46	0	P5_CD4+LTB+IL7R+	TOMM20
ANP32B2	0	0.358592	0.75	0.515	0	P5_CD4+LTB+IL7R+	ANP32B
TAB2	0	0.358055	0.289	0.123	0	P5_CD4+LTB+IL7R+	TAB2
MALT1	0	0.350963	0.358	0.182	0	P5_CD4+LTB+IL7R+	MALT1
EVI2B1	0	0.350958	0.577	0.359	0	P5_CD4+LTB+IL7R+	EVI2B
ETS11	0	0.349783	0.801	0.62	0	P5_CD4+LTB+IL7R+	ETS1
EEF2	0	0.346466	0.926	0.825	0	P5_CD4+LTB+IL7R+	EEF2
NACA	0	0.344862	0.978	0.943	0	P5_CD4+LTB+IL7R+	NACA
NSA2	0	0.344512	0.714	0.499	0	P5_CD4+LTB+IL7R+	NSA2
NFKB1	0	0.341904	0.343	0.167	0	P5_CD4+LTB+IL7R+	NFKB1
SNHG8	0	0.341013	0.586	0.357	0	P5_CD4+LTB+IL7R+	SNHG8
RILPL2	0	0.340832	0.327	0.153	0	P5_CD4+LTB+IL7R+	RILPL2
CD48	0	0.339896	0.862	0.716	0	P5_CD4+LTB+IL7R+	CD48
CD692	0	0.33897	0.643	0.444	0	P5_CD4+LTB+IL7R+	CD69
EML42	0	0.337641	0.534	0.309	0	P5_CD4+LTB+IL7R+	EML4
HEBP21	0	0.336881	0.391	0.207	0	P5_CD4+LTB+IL7R+	HEBP2
BORCS5	0	0.333389	0.27	0.124	0	P5_CD4+LTB+IL7R+	BORCS5
CD3G3	0	0.332925	0.795	0.448	0	P5_CD4+LTB+IL7R+	CD3G
NOP53	0	0.329928	0.917	0.781	0	P5_CD4+LTB+IL7R+	NOP53
RSL1D1	0	0.329898	0.569	0.366	0	P5_CD4+LTB+IL7R+	RSL1D1
STK17B	0	0.32988	0.702	0.507	0	P5_CD4+LTB+IL7R+	STK17B
SMDT1	0	0.329842	0.666	0.466	0	P5_CD4+LTB+IL7R+	SMDT1
STMN3	0	0.329278	0.286	0.117	0	P5_CD4+LTB+IL7R+	STMN3
TOMM7	0	0.328186	0.947	0.867	0	P5_CD4+LTB+IL7R+	TOMM7
PEBP11	0	0.327223	0.658	0.429	0	P5_CD4+LTB+IL7R+	PEBP1
CDKN1B1	0	0.32696	0.513	0.311	0	P5_CD4+LTB+IL7R+	CDKN1B
CD61	0	0.326672	0.431	0.243	0	P5_CD4+LTB+IL7R+	CD6
MPRIP	0	0.326033	0.319	0.16	0	P5_CD4+LTB+IL7R+	MPRIP
CD3D5	0	0.323703	0.907	0.536	0	P5_CD4+LTB+IL7R+	CD3D
ODF2L1	0	0.322435	0.478	0.285	0	P5_CD4+LTB+IL7R+	ODF2L
SPTAN11	2.37674e-305	0.344786	0.538	0.347	3.17746e-301	P5_CD4+LTB+IL7R+	SPTAN1
KIAA1551	3.05202e-297	0.332047	0.701	0.509	4.08024e-293	P5_CD4+LTB+IL7R+	KIAA1551
FAM107B1	3.89336e-293	0.335596	0.683	0.503	5.20504e-289	P5_CD4+LTB+IL7R+	FAM107B
SLC2A31	8.5865e-240	0.335451	0.405	0.247	1.14793e-235	P5_CD4+LTB+IL7R+	SLC2A3
RNF19A1	9.30061e-214	0.336015	0.441	0.289	1.2434e-209	P5_CD4+LTB+IL7R+	RNF19A
RTKN2	0	1.44188	0.41	0.03	0	P6_Treg	RTKN2
IL2RA	0	1.27479	0.443	0.037	0	P6_Treg	IL2RA
FOXP3	0	1.26493	0.383	0.006	0	P6_Treg	FOXP3
TTN	0	1.17227	0.419	0.078	0	P6_Treg	TTN
CTLA4	0	1.02215	0.355	0.029	0	P6_Treg	CTLA4
RGS1	0	0.958778	0.409	0.111	0	P6_Treg	RGS1
TBC1D4	0	0.900473	0.409	0.094	0	P6_Treg	TBC1D4
STAM	0	0.894139	0.387	0.075	0	P6_Treg	STAM
IKZF2	0	0.853184	0.356	0.064	0	P6_Treg	IKZF2
CCR4	0	0.653098	0.267	0.048	0	P6_Treg	CCR4
BIRC3	1.97076e-286	0.889205	0.58	0.227	2.63471e-282	P6_Treg	BIRC3
CD271	9.12645e-278	0.805199	0.677	0.301	1.22012e-273	P6_Treg	CD27
ARID5B	7.52689e-245	0.78797	0.633	0.296	1.00627e-240	P6_Treg	ARID5B
IL321	5.74015e-240	0.69151	0.973	0.803	7.67401e-236	P6_Treg	IL32
LTB	4.44658e-223	0.588279	0.925	0.545	5.94464e-219	P6_Treg	LTB
LGALS3	2.27371e-198	0.781266	0.382	0.133	3.03973e-194	P6_Treg	LGALS3
USP15	7.41627e-180	0.732969	0.684	0.43	9.91482e-176	P6_Treg	USP15
TIGIT1	9.93401e-179	0.759598	0.46	0.193	1.32808e-174	P6_Treg	TIGIT
TRAC1	9.64737e-177	0.705879	0.828	0.531	1.28976e-172	P6_Treg	TRAC
CD52	4.83947e-173	0.501477	0.977	0.823	6.46988e-169	P6_Treg	CD52
AQP3	1.62564e-171	0.638152	0.446	0.182	2.17332e-167	P6_Treg	AQP3
RCAN3	1.12598e-167	0.575455	0.544	0.25	1.50532e-163	P6_Treg	RCAN3
GBP51	2.52121e-162	0.775128	0.563	0.298	3.37061e-158	P6_Treg	GBP5
PBXIP1	8.71502e-160	0.664227	0.636	0.362	1.16511e-155	P6_Treg	PBXIP1
PMAIP1	2.1971e-156	0.642864	0.298	0.098	2.93731e-152	P6_Treg	PMAIP1
IL6R	9.68485e-151	0.553771	0.286	0.095	1.29477e-146	P6_Treg	IL6R
CD3D1	8.09865e-138	0.436552	0.91	0.601	1.08271e-133	P6_Treg	CD3D
S100A10	1.10439e-137	0.488878	0.891	0.763	1.47646e-133	P6_Treg	S100A10
TTC39C	7.892e-137	0.627896	0.549	0.298	1.05508e-132	P6_Treg	TTC39C
FAS	6.32864e-134	0.551666	0.29	0.104	8.46076e-130	P6_Treg	FAS
CD4	1.73171e-132	0.482683	0.338	0.13	2.31512e-128	P6_Treg	CD4
ISG20	2.34541e-131	0.514734	0.78	0.578	3.13558e-127	P6_Treg	ISG20
FAM129A	6.27649e-131	0.58309	0.452	0.218	8.39104e-127	P6_Treg	FAM129A
IL10RA	1.17864e-130	0.587245	0.676	0.435	1.57573e-126	P6_Treg	IL10RA
NABP1	2.28645e-128	0.57715	0.315	0.122	3.05676e-124	P6_Treg	NABP1
CASK	5.76738e-128	0.509482	0.283	0.103	7.7104e-124	P6_Treg	CASK
SUSD3	1.14222e-126	0.527109	0.322	0.128	1.52703e-122	P6_Treg	SUSD3
CORO1B	3.07185e-126	0.647557	0.515	0.276	4.10675e-122	P6_Treg	CORO1B
SHMT2	2.09748e-124	0.544044	0.265	0.093	2.80413e-120	P6_Treg	SHMT2
CYTOR	1.69108e-120	0.635902	0.531	0.297	2.2608e-116	P6_Treg	CYTOR
LEF1	7.55584e-119	0.548932	0.453	0.224	1.01014e-114	P6_Treg	LEF1
FCMR	3.12932e-117	0.617938	0.538	0.304	4.18359e-113	P6_Treg	FCMR
SAMHD1	1.03883e-115	0.514794	0.744	0.56	1.38882e-111	P6_Treg	SAMHD1
VIM	4.17903e-115	0.402898	0.922	0.781	5.58694e-111	P6_Treg	VIM
SPOCK2	1.53201e-114	0.50845	0.663	0.417	2.04814e-110	P6_Treg	SPOCK2
YPEL2	9.08756e-114	0.43393	0.258	0.093	1.21492e-109	P6_Treg	YPEL2
CD28	2.48059e-112	0.522492	0.327	0.14	3.31631e-108	P6_Treg	CD28
SMCHD1	7.98208e-111	0.564681	0.706	0.518	1.06712e-106	P6_Treg	SMCHD1
LDHB	2.19095e-105	0.400918	0.851	0.654	2.92909e-101	P6_Treg	LDHB
EZR	2.22506e-104	0.511911	0.651	0.439	2.97468e-100	P6_Treg	EZR
MAL	7.04389e-104	0.603715	0.385	0.183	9.41698e-100	P6_Treg	MAL
PIK3IP1	1.34123e-100	0.452905	0.669	0.433	1.79309e-96	P6_Treg	PIK3IP1
SELL	2.19386e-98	0.499168	0.615	0.37	2.93297e-94	P6_Treg	SELL
CD44	2.14358e-94	0.411083	0.717	0.505	2.86575e-90	P6_Treg	CD44
SIT1	8.72068e-94	0.520821	0.384	0.193	1.16587e-89	P6_Treg	SIT1
RGCC	1.74298e-93	0.50413	0.282	0.12	2.33019e-89	P6_Treg	RGCC
MAP3K1	1.13147e-90	0.452576	0.341	0.162	1.51266e-86	P6_Treg	MAP3K1
DNPH1	1.34086e-89	0.432513	0.29	0.128	1.7926e-85	P6_Treg	DNPH1
THEM4	1.6338e-89	0.473808	0.355	0.175	2.18423e-85	P6_Treg	THEM4
ANXA5	3.74035e-88	0.444127	0.499	0.287	5.00048e-84	P6_Treg	ANXA5
PLP2	2.30896e-86	0.505997	0.504	0.298	3.08685e-82	P6_Treg	PLP2
PRDX1	5.18943e-86	0.43375	0.594	0.386	6.93775e-82	P6_Treg	PRDX1
TRBC2	2.03356e-85	0.541002	0.812	0.675	2.71867e-81	P6_Treg	TRBC2
DGKA	1.31314e-83	0.445092	0.442	0.246	1.75554e-79	P6_Treg	DGKA
S100A4	7.25774e-82	0.323038	0.97	0.919	9.70288e-78	P6_Treg	S100A4
SOD1	1.56045e-81	0.38732	0.754	0.589	2.08617e-77	P6_Treg	SOD1
HLA-DRB11	8.32728e-81	0.63174	0.491	0.295	1.11327e-76	P6_Treg	HLA-DRB1
ITGB1	1.57578e-80	0.434405	0.731	0.546	2.10667e-76	P6_Treg	ITGB1
SAT1	9.80305e-80	0.560716	0.695	0.542	1.31057e-75	P6_Treg	SAT1
ELK3	3.37167e-79	0.480915	0.285	0.133	4.50759e-75	P6_Treg	ELK3
EPB41	7.63013e-78	0.472897	0.636	0.471	1.02007e-73	P6_Treg	EPB41
NSD3	1.04081e-76	0.417671	0.639	0.456	1.39146e-72	P6_Treg	NSD3
HLA-DQB11	4.36365e-75	0.39977	0.263	0.116	5.83377e-71	P6_Treg	HLA-DQB1
S1PR4	1.38065e-73	0.488641	0.56	0.383	1.8458e-69	P6_Treg	S1PR4
TNFRSF1B	1.63162e-73	0.425499	0.483	0.292	2.18131e-69	P6_Treg	TNFRSF1B
PHTF2	4.09002e-68	0.39691	0.267	0.126	5.46794e-64	P6_Treg	PHTF2
UBL3	1.1623e-67	0.418472	0.36	0.198	1.55388e-63	P6_Treg	UBL3
HEBP2	1.74276e-67	0.415549	0.409	0.238	2.3299e-63	P6_Treg	HEBP2
SGTB	3.19807e-64	0.378175	0.252	0.119	4.2755e-60	P6_Treg	SGTB
CMTM7	3.07483e-62	0.386355	0.272	0.133	4.11073e-58	P6_Treg	CMTM7
FAM102A	6.71048e-61	0.415741	0.312	0.166	8.97124e-57	P6_Treg	FAM102A
TULP4	2.78856e-60	0.393884	0.278	0.141	3.72803e-56	P6_Treg	TULP4
CDKN1B	8.64013e-60	0.39407	0.514	0.347	1.1551e-55	P6_Treg	CDKN1B
GSTK1	1.49879e-59	0.346047	0.762	0.609	2.00373e-55	P6_Treg	GSTK1
PAG1	3.85854e-59	0.41309	0.444	0.278	5.15848e-55	P6_Treg	PAG1
RCSD1	3.19015e-57	0.386726	0.554	0.393	4.26491e-53	P6_Treg	RCSD1
OCIAD2	2.08122e-55	0.34261	0.5	0.334	2.78239e-51	P6_Treg	OCIAD2
FOXP1	4.23982e-55	0.419531	0.585	0.431	5.66821e-51	P6_Treg	FOXP1
GBP2	5.07824e-55	0.421068	0.494	0.341	6.78909e-51	P6_Treg	GBP2
LEPROTL1	5.14612e-55	0.323415	0.637	0.468	6.87985e-51	P6_Treg	LEPROTL1
SPTAN1	4.61074e-53	0.392662	0.53	0.381	6.1641e-49	P6_Treg	SPTAN1
CNST	2.26111e-52	0.393919	0.319	0.184	3.02288e-48	P6_Treg	CNST
CCM2	1.10062e-51	0.369137	0.43	0.28	1.47142e-47	P6_Treg	CCM2
TNFRSF25	1.10501e-51	0.38023	0.305	0.17	1.47728e-47	P6_Treg	TNFRSF25
ANXA2	2.5889e-51	0.367016	0.602	0.458	3.4611e-47	P6_Treg	ANXA2
ETS1	2.49411e-50	0.348352	0.765	0.653	3.33438e-46	P6_Treg	ETS1
R3HDM4	3.54411e-49	0.393197	0.331	0.193	4.73812e-45	P6_Treg	R3HDM4
SLFN5	4.84932e-49	0.39182	0.64	0.513	6.48305e-45	P6_Treg	SLFN5
CAMK4	8.76234e-49	0.354521	0.354	0.212	1.17144e-44	P6_Treg	CAMK4
FXYD5	5.49653e-48	0.346549	0.797	0.658	7.34831e-44	P6_Treg	FXYD5
PIM2	3.10608e-47	0.423961	0.323	0.189	4.15252e-43	P6_Treg	PIM2
CD5	5.69982e-47	0.340541	0.291	0.161	7.62009e-43	P6_Treg	CD5
ITK	1.61814e-46	0.376613	0.469	0.318	2.16329e-42	P6_Treg	ITK
PLEC	1.54475e-44	0.359847	0.28	0.157	2.06518e-40	P6_Treg	PLEC
TMEM63A	1.8901e-43	0.333927	0.293	0.17	2.52688e-39	P6_Treg	TMEM63A
EML4	2.38909e-43	0.339327	0.496	0.35	3.19398e-39	P6_Treg	EML4
SYNE2	2.49537e-43	0.403819	0.74	0.636	3.33606e-39	P6_Treg	SYNE2
ELOVL5	5.80321e-43	0.342761	0.309	0.184	7.75831e-39	P6_Treg	ELOVL5
POU2F2	1.49162e-42	0.345362	0.291	0.168	1.99415e-38	P6_Treg	POU2F2
CYLD	1.63294e-42	0.35493	0.565	0.43	2.18308e-38	P6_Treg	CYLD
TLK1	2.10618e-42	0.334905	0.399	0.267	2.81576e-38	P6_Treg	TLK1
EIF3A	1.52011e-41	0.350373	0.613	0.488	2.03224e-37	P6_Treg	EIF3A
PCNX1	2.31373e-41	0.344124	0.348	0.222	3.09323e-37	P6_Treg	PCNX1
CNTRL	3.41366e-41	0.364875	0.4	0.272	4.56372e-37	P6_Treg	CNTRL
NCK2	4.63265e-41	0.346944	0.352	0.226	6.19339e-37	P6_Treg	NCK2
PHACTR2	7.87631e-41	0.331741	0.338	0.209	1.05298e-36	P6_Treg	PHACTR2
PRDM1	7.54323e-40	0.355561	0.517	0.379	1.00845e-35	P6_Treg	PRDM1
EPSTI1	4.65993e-38	0.358599	0.254	0.146	6.22986e-34	P6_Treg	EPSTI1
TPR	2.95721e-37	0.343927	0.623	0.507	3.95349e-33	P6_Treg	TPR
CLDND1	8.37664e-37	0.342328	0.324	0.206	1.11987e-32	P6_Treg	CLDND1
UGP2	5.06342e-34	0.339911	0.44	0.32	6.76928e-30	P6_Treg	UGP2
VMP1	4.23943e-32	0.34362	0.362	0.25	5.66769e-28	P6_Treg	VMP1
CTSA	7.02564e-32	0.329572	0.285	0.179	9.39258e-28	P6_Treg	CTSA
NEAT1	7.32402e-25	0.360644	0.82	0.757	9.79149e-21	P6_Treg	NEAT1
FLT3LG	1.81885e-24	0.332921	0.293	0.2	2.43161e-20	P6_Treg	FLT3LG
CCR72	0	0.98094	0.489	0.151	0	P7_CD4+Naive	CCR7
TRABD2A2	0	0.786846	0.423	0.141	0	P7_CD4+Naive	TRABD2A
FHIT	0	0.766669	0.308	0.061	0	P7_CD4+Naive	FHIT
IL6ST1	4.02308e-294	0.820449	0.429	0.157	5.37845e-290	P7_CD4+Naive	IL6ST
MAL2	5.30725e-271	0.755263	0.458	0.178	7.09526e-267	P7_CD4+Naive	MAL
LEF13	2.29054e-264	0.789492	0.503	0.22	3.06223e-260	P7_CD4+Naive	LEF1
TCF74	9.09676e-226	0.744515	0.621	0.352	1.21615e-221	P7_CD4+Naive	TCF7
RCAN33	1.43456e-224	0.6999	0.518	0.247	1.91787e-220	P7_CD4+Naive	RCAN3
TPT11	8.12589e-187	0.441508	0.981	0.985	1.08635e-182	P7_CD4+Naive	TPT1
OXNAD1	9.78617e-186	0.683676	0.492	0.257	1.30831e-181	P7_CD4+Naive	OXNAD1
SATB12	4.54942e-181	0.670734	0.454	0.222	6.08212e-177	P7_CD4+Naive	SATB1
FOXP12	3.34074e-156	0.599902	0.643	0.427	4.46624e-152	P7_CD4+Naive	FOXP1
LTB4	5.51052e-156	0.532594	0.755	0.547	7.36702e-152	P7_CD4+Naive	LTB
EEF1B21	3.43644e-148	0.415445	0.904	0.902	4.59418e-144	P7_CD4+Naive	EEF1B2
BCL21	5.25768e-148	0.628536	0.511	0.292	7.02899e-144	P7_CD4+Naive	BCL2
PRKCA1	2.28082e-143	0.548609	0.32	0.14	3.04923e-139	P7_CD4+Naive	PRKCA
ETS12	7.044e-129	0.478113	0.799	0.65	9.41712e-125	P7_CD4+Naive	ETS1
ABLIM1	1.04034e-128	0.545906	0.37	0.184	1.39083e-124	P7_CD4+Naive	ABLIM1
CAMK42	1.20385e-125	0.577685	0.397	0.209	1.60943e-121	P7_CD4+Naive	CAMK4
MAML2	2.2178e-125	0.524843	0.315	0.145	2.96497e-121	P7_CD4+Naive	MAML2
SELL4	3.83551e-121	0.461483	0.598	0.368	5.1277e-117	P7_CD4+Naive	SELL
ATM1	1.40942e-115	0.44014	0.738	0.563	1.88426e-111	P7_CD4+Naive	ATM
BCL11B1	1.52092e-115	0.533607	0.512	0.32	2.03331e-111	P7_CD4+Naive	BCL11B
ITGA6	2.8229e-114	0.507096	0.312	0.148	3.77394e-110	P7_CD4+Naive	ITGA6
PIK3IP14	4.14715e-113	0.505152	0.608	0.433	5.54432e-109	P7_CD4+Naive	PIK3IP1
LDHB3	1.22908e-109	0.450948	0.75	0.656	1.64316e-105	P7_CD4+Naive	LDHB
NPM11	4.88436e-109	0.359428	0.86	0.839	6.5299e-105	P7_CD4+Naive	NPM1
SESN32	5.84533e-105	0.47145	0.259	0.114	7.81463e-101	P7_CD4+Naive	SESN3
PABPC11	7.49344e-100	0.338179	0.879	0.838	1.0018e-95	P7_CD4+Naive	PABPC1
TRAT11	1.10069e-97	0.482054	0.423	0.245	1.47151e-93	P7_CD4+Naive	TRAT1
NOSIP2	1.31498e-95	0.493353	0.612	0.445	1.75799e-91	P7_CD4+Naive	NOSIP
DGKA4	1.36033e-92	0.506388	0.414	0.245	1.81863e-88	P7_CD4+Naive	DGKA
RIPOR21	2.19866e-90	0.379046	0.798	0.682	2.93939e-86	P7_CD4+Naive	RIPOR2
NFKBIZ	2.07593e-82	0.428624	0.285	0.145	2.77532e-78	P7_CD4+Naive	NFKBIZ
RFLNB	1.15333e-81	0.439298	0.272	0.137	1.54189e-77	P7_CD4+Naive	RFLNB
TMEM1231	6.25445e-80	0.411812	0.565	0.407	8.36157e-76	P7_CD4+Naive	TMEM123
GCC21	5.07448e-78	0.423117	0.607	0.454	6.78407e-74	P7_CD4+Naive	GCC2
SARAF2	7.32875e-78	0.33992	0.827	0.783	9.79781e-74	P7_CD4+Naive	SARAF
RGS102	2.49436e-77	0.401375	0.536	0.379	3.33471e-73	P7_CD4+Naive	RGS10
SERINC51	2.96225e-76	0.385404	0.307	0.166	3.96024e-72	P7_CD4+Naive	SERINC5
CHMP7	3.2197e-75	0.383308	0.255	0.128	4.30442e-71	P7_CD4+Naive	CHMP7
STK17B1	1.01573e-72	0.408137	0.665	0.541	1.35792e-68	P7_CD4+Naive	STK17B
CHD3	7.94339e-72	0.426355	0.43	0.284	1.06195e-67	P7_CD4+Naive	CHD3
CYLD2	1.55702e-71	0.409183	0.575	0.428	2.08158e-67	P7_CD4+Naive	CYLD
MLLT3	1.97171e-71	0.375999	0.266	0.139	2.63598e-67	P7_CD4+Naive	MLLT3
FAM102A3	1.09184e-70	0.386238	0.299	0.165	1.45968e-66	P7_CD4+Naive	FAM102A
EIF4B1	1.52688e-69	0.352209	0.702	0.599	2.04129e-65	P7_CD4+Naive	EIF4B
FYB12	6.43474e-69	0.336494	0.797	0.695	8.6026e-65	P7_CD4+Naive	FYB1
DDX17	2.47487e-65	0.324797	0.724	0.591	3.30865e-61	P7_CD4+Naive	DDX17
TTC3	2.57145e-65	0.406947	0.516	0.372	3.43777e-61	P7_CD4+Naive	TTC3
MBNL1	3.89592e-61	0.334706	0.724	0.616	5.20845e-57	P7_CD4+Naive	MBNL1
PDE3B	6.40562e-61	0.379455	0.333	0.2	8.56367e-57	P7_CD4+Naive	PDE3B
TNRC6B1	2.46371e-60	0.355375	0.619	0.48	3.29374e-56	P7_CD4+Naive	TNRC6B
C6orf48	3.33071e-60	0.359125	0.506	0.365	4.45282e-56	P7_CD4+Naive	C6orf48
PSIP1	2.02976e-58	0.348652	0.567	0.433	2.71359e-54	P7_CD4+Naive	PSIP1
HIST1H1D2	7.1885e-58	0.382907	0.561	0.412	9.6103e-54	P7_CD4+Naive	HIST1H1D
CD552	1.07548e-57	0.360791	0.398	0.264	1.43781e-53	P7_CD4+Naive	CD55
TESPA12	2.37659e-55	0.343489	0.324	0.2	3.17727e-51	P7_CD4+Naive	TESPA1
PDE7A	5.14477e-55	0.374304	0.295	0.178	6.87804e-51	P7_CD4+Naive	PDE7A
SH3YL11	6.8249e-55	0.363117	0.296	0.176	9.1242e-51	P7_CD4+Naive	SH3YL1
AAK1	1.20789e-54	0.324558	0.651	0.542	1.61483e-50	P7_CD4+Naive	AAK1
SPTBN11	2.84707e-54	0.378143	0.362	0.236	3.80625e-50	P7_CD4+Naive	SPTBN1
EIF3E1	5.69401e-54	0.324297	0.714	0.654	7.61232e-50	P7_CD4+Naive	EIF3E
SNHG81	1.10823e-53	0.336153	0.524	0.398	1.48159e-49	P7_CD4+Naive	SNHG8
ATXN7L3B	2.9075e-53	0.341364	0.422	0.295	3.88704e-49	P7_CD4+Naive	ATXN7L3B
INPP4B1	2.31558e-51	0.33351	0.343	0.215	3.0957e-47	P7_CD4+Naive	INPP4B
ZRANB2	2.28313e-50	0.342413	0.555	0.435	3.05231e-46	P7_CD4+Naive	ZRANB2
SNHG7	5.24686e-49	0.322205	0.356	0.236	7.01453e-45	P7_CD4+Naive	SNHG7
EPB411	4.93953e-48	0.335444	0.586	0.471	6.60365e-44	P7_CD4+Naive	EPB41
PHF3	8.26038e-48	0.353442	0.479	0.359	1.10433e-43	P7_CD4+Naive	PHF3
TUT4	1.41792e-46	0.333816	0.487	0.366	1.89562e-42	P7_CD4+Naive	TUT4
NSA21	4.01871e-44	0.334036	0.628	0.538	5.37261e-40	P7_CD4+Naive	NSA2
NFKB11	4.77192e-42	0.328051	0.304	0.198	6.37958e-38	P7_CD4+Naive	NFKB1
RSL1D11	3.3692e-40	0.327033	0.507	0.403	4.50428e-36	P7_CD4+Naive	RSL1D1
ZBTB20	7.31854e-34	0.331318	0.346	0.246	9.78415e-30	P7_CD4+Naive	ZBTB20
CCR73	0	1.4578	0.781	0.14	0	P8_CD8+Naive	CCR7
CD8B3	0	1.2435	0.839	0.196	0	P8_CD8+Naive	CD8B
NELL2	0	1.08143	0.537	0.07	0	P8_CD8+Naive	NELL2
LEF14	0	1.07271	0.75	0.211	0	P8_CD8+Naive	LEF1
OXNAD11	0	1.05223	0.744	0.248	0	P8_CD8+Naive	OXNAD1
ACTN1	0	1.0088	0.514	0.061	0	P8_CD8+Naive	ACTN1
TCF75	0	0.97943	0.84	0.345	0	P8_CD8+Naive	TCF7
TRABD2A3	0	0.963759	0.607	0.134	0	P8_CD8+Naive	TRABD2A
AIF11	0	0.957138	0.607	0.119	0	P8_CD8+Naive	AIF1
LRRN3	0	0.953971	0.349	0.019	0	P8_CD8+Naive	LRRN3
PDE3B1	0	0.901696	0.617	0.19	0	P8_CD8+Naive	PDE3B
RGS103	0	0.866041	0.816	0.368	0	P8_CD8+Naive	RGS10
RCAN34	0	0.852289	0.71	0.241	0	P8_CD8+Naive	RCAN3
NOSIP3	0	0.852217	0.849	0.436	0	P8_CD8+Naive	NOSIP
NUCB22	0	0.81722	0.733	0.321	0	P8_CD8+Naive	NUCB2
SATB13	0	0.806374	0.62	0.216	0	P8_CD8+Naive	SATB1
MAL3	0	0.78943	0.596	0.173	0	P8_CD8+Naive	MAL
EEF1B22	0	0.785408	0.983	0.899	0	P8_CD8+Naive	EEF1B2
SELL5	0	0.781477	0.814	0.36	0	P8_CD8+Naive	SELL
LDHB4	0	0.738652	0.949	0.649	0	P8_CD8+Naive	LDHB
PIK3IP15	0	0.73363	0.816	0.425	0	P8_CD8+Naive	PIK3IP1
SNHG82	0	0.732479	0.778	0.388	0	P8_CD8+Naive	SNHG8
ABLIM11	0	0.724937	0.513	0.179	0	P8_CD8+Naive	ABLIM1
NPM12	0	0.722997	0.967	0.835	0	P8_CD8+Naive	NPM1
FOXP13	0	0.722199	0.808	0.421	0	P8_CD8+Naive	FOXP1
BCL22	0	0.718843	0.647	0.287	0	P8_CD8+Naive	BCL2
CD553	0	0.717921	0.619	0.256	0	P8_CD8+Naive	CD55
LTB5	0	0.698834	0.962	0.54	0	P8_CD8+Naive	LTB
LDLRAP1	0	0.681364	0.479	0.154	0	P8_CD8+Naive	LDLRAP1
CD275	0	0.646528	0.717	0.296	0	P8_CD8+Naive	CD27
TPT12	0	0.64145	1	0.985	0	P8_CD8+Naive	TPT1
RETREG1	0	0.637696	0.329	0.066	0	P8_CD8+Naive	RETREG1
PASK1	0	0.629815	0.334	0.084	0	P8_CD8+Naive	PASK
SARAF3	0	0.610613	0.958	0.778	0	P8_CD8+Naive	SARAF
YBX31	0	0.604432	0.339	0.07	0	P8_CD8+Naive	YBX3
PDK11	0	0.603059	0.322	0.075	0	P8_CD8+Naive	PDK1
HSP90AB11	0	0.598973	0.913	0.682	0	P8_CD8+Naive	HSP90AB1
PRKCA2	0	0.584768	0.432	0.136	0	P8_CD8+Naive	PRKCA
SERINC52	0	0.584604	0.471	0.16	0	P8_CD8+Naive	SERINC5
SPINT2	0	0.583096	0.331	0.064	0	P8_CD8+Naive	SPINT2
BACH2	0	0.581217	0.296	0.052	0	P8_CD8+Naive	BACH2
CD8A2	0	0.57106	0.703	0.254	0	P8_CD8+Naive	CD8A
ARMH11	0	0.570159	0.302	0.071	0	P8_CD8+Naive	ARMH1
PABPC12	0	0.552698	0.963	0.835	0	P8_CD8+Naive	PABPC1
NACA1	0	0.545116	0.987	0.949	0	P8_CD8+Naive	NACA
EEF1A11	0	0.482091	1	0.997	0	P8_CD8+Naive	EEF1A1
RACK11	0	0.455313	0.984	0.951	0	P8_CD8+Naive	RACK1
FAU	0	0.363302	0.994	0.973	0	P8_CD8+Naive	FAU
EIF3E2	6.93156e-308	0.593695	0.909	0.646	9.2668e-304	P8_CD8+Naive	EIF3E
SH3YL12	3.6247e-307	0.656408	0.479	0.169	4.84586e-303	P8_CD8+Naive	SH3YL1
CAMK43	9.5615e-306	0.64374	0.537	0.204	1.27828e-301	P8_CD8+Naive	CAMK4
LEPROTL12	1.01937e-287	0.60304	0.802	0.46	1.36279e-283	P8_CD8+Naive	LEPROTL1
UBA52	1.67421e-279	0.335127	0.99	0.962	2.23825e-275	P8_CD8+Naive	UBA52
MAML21	2.20847e-274	0.591014	0.418	0.141	2.9525e-270	P8_CD8+Naive	MAML2
IL7R3	1.28623e-260	0.463034	0.905	0.469	1.71957e-256	P8_CD8+Naive	IL7R
MYC2	2.52245e-252	0.622606	0.413	0.146	3.37227e-248	P8_CD8+Naive	MYC
IL6ST2	1.32761e-251	0.548764	0.437	0.158	1.77488e-247	P8_CD8+Naive	IL6ST
FAM102A4	2.24695e-251	0.543588	0.438	0.16	3.00395e-247	P8_CD8+Naive	FAM102A
ATM2	4.41878e-251	0.612902	0.83	0.56	5.90747e-247	P8_CD8+Naive	ATM
DGKA5	2.8454e-250	0.571647	0.557	0.24	3.80402e-246	P8_CD8+Naive	DGKA
C6orf481	3.23279e-250	0.591188	0.694	0.358	4.32192e-246	P8_CD8+Naive	C6orf48
TMEM1232	2.49865e-249	0.557277	0.743	0.4	3.34045e-245	P8_CD8+Naive	TMEM123
TTN2	6.29185e-248	0.528997	0.291	0.08	8.41158e-244	P8_CD8+Naive	TTN
BTF3	1.05705e-241	0.406059	0.967	0.873	1.41317e-237	P8_CD8+Naive	BTF3
ZFAS11	1.68712e-240	0.528914	0.854	0.563	2.25551e-236	P8_CD8+Naive	ZFAS1
EEF1D	3.08398e-238	0.365517	0.978	0.924	4.12298e-234	P8_CD8+Naive	EEF1D
EIF4B2	4.02592e-233	0.532951	0.861	0.593	5.38225e-229	P8_CD8+Naive	EIF4B
BCL11B2	7.77515e-228	0.572596	0.633	0.316	1.03946e-223	P8_CD8+Naive	BCL11B
PCED1B	5.50736e-226	0.54888	0.4	0.146	7.36279e-222	P8_CD8+Naive	PCED1B
CHCHD10	2.012e-224	0.518289	0.548	0.244	2.68984e-220	P8_CD8+Naive	CHCHD10
CRTAM1	4.20694e-220	0.404175	0.265	0.072	5.62426e-216	P8_CD8+Naive	CRTAM
A1BG	8.34194e-213	0.447486	0.33	0.108	1.11523e-208	P8_CD8+Naive	A1BG
THEMIS2	1.0121e-206	0.511764	0.412	0.159	1.35308e-202	P8_CD8+Naive	THEMIS
NFKB12	3.52728e-202	0.549832	0.451	0.192	4.71562e-198	P8_CD8+Naive	NFKB1
RGCC2	4.34359e-200	0.488695	0.335	0.116	5.80694e-196	P8_CD8+Naive	RGCC
PECAM11	1.85915e-195	0.438589	0.33	0.111	2.48549e-191	P8_CD8+Naive	PECAM1
RIC3	2.0075e-195	0.46146	0.282	0.089	2.68383e-191	P8_CD8+Naive	RIC3
UQCRB	1.80937e-192	0.391962	0.943	0.82	2.41894e-188	P8_CD8+Naive	UQCRB
PFDN5	1.03997e-191	0.32718	0.973	0.906	1.39033e-187	P8_CD8+Naive	PFDN5
NAA16	4.9796e-191	0.497264	0.357	0.132	6.65723e-187	P8_CD8+Naive	NAA16
ALKBH71	1.34446e-189	0.505663	0.59	0.3	1.79741e-185	P8_CD8+Naive	ALKBH7
BTG1	1.41106e-185	0.325945	0.982	0.934	1.88645e-181	P8_CD8+Naive	BTG1
C12orf571	2.89617e-185	0.47185	0.843	0.574	3.87189e-181	P8_CD8+Naive	C12orf57
UXT	3.47725e-184	0.470807	0.818	0.553	4.64873e-180	P8_CD8+Naive	UXT
ZNF101	4.66857e-181	0.504153	0.392	0.159	6.24141e-177	P8_CD8+Naive	ZNF101
TNFSF81	2.74094e-178	0.453726	0.34	0.126	3.66437e-174	P8_CD8+Naive	TNFSF8
PRMT2	1.36345e-176	0.472737	0.811	0.557	1.82279e-172	P8_CD8+Naive	PRMT2
LBH	1.72717e-176	0.498598	0.729	0.439	2.30905e-172	P8_CD8+Naive	LBH
NAP1L13	1.75106e-175	0.457312	0.834	0.575	2.34099e-171	P8_CD8+Naive	NAP1L1
TOB13	3.56111e-175	0.451903	0.512	0.239	4.76085e-171	P8_CD8+Naive	TOB1
SNHG71	2.14835e-173	0.466321	0.493	0.231	2.87213e-169	P8_CD8+Naive	SNHG7
ANP32B3	2.23271e-173	0.458634	0.819	0.552	2.9849e-169	P8_CD8+Naive	ANP32B
TGFBR2	8.11865e-173	0.494299	0.513	0.249	1.08538e-168	P8_CD8+Naive	TGFBR2
NDFIP1	8.90189e-173	0.502493	0.675	0.391	1.19009e-168	P8_CD8+Naive	NDFIP1
ITGA61	1.42191e-172	0.477194	0.368	0.146	1.90095e-168	P8_CD8+Naive	ITGA6
TTC31	1.5873e-172	0.508685	0.652	0.367	2.12206e-168	P8_CD8+Naive	TTC3
SRSF5	1.89475e-172	0.376655	0.942	0.822	2.5331e-168	P8_CD8+Naive	SRSF5
TESPA13	3.18042e-170	0.474328	0.442	0.195	4.25191e-166	P8_CD8+Naive	TESPA1
RFLNB1	1.08084e-169	0.486209	0.346	0.135	1.44498e-165	P8_CD8+Naive	RFLNB
PDE7A1	2.73832e-166	0.431372	0.406	0.174	3.66086e-162	P8_CD8+Naive	PDE7A
CHMP71	6.9183e-166	0.429698	0.33	0.126	9.24907e-162	P8_CD8+Naive	CHMP7
GCC22	1.25853e-165	0.499204	0.723	0.45	1.68253e-161	P8_CD8+Naive	GCC2
EIF3H	1.73117e-162	0.418866	0.848	0.608	2.31441e-158	P8_CD8+Naive	EIF3H
COX4I1	9.44215e-162	0.326614	0.956	0.873	1.26232e-157	P8_CD8+Naive	COX4I1
BCAS4	3.73174e-161	0.38074	0.258	0.085	4.98897e-157	P8_CD8+Naive	BCAS4
GPR155	4.98864e-161	0.436978	0.326	0.124	6.66932e-157	P8_CD8+Naive	GPR155
RSL1D12	6.69803e-160	0.474743	0.668	0.397	8.9546e-156	P8_CD8+Naive	RSL1D1
MLXIP	4.76574e-159	0.404879	0.293	0.106	6.37132e-155	P8_CD8+Naive	MLXIP
EIF2S3	8.22122e-159	0.455173	0.672	0.399	1.09909e-154	P8_CD8+Naive	EIF2S3
CD481	6.66144e-158	0.396065	0.908	0.739	8.90568e-154	P8_CD8+Naive	CD48
TMEM243	2.76903e-155	0.467965	0.51	0.255	3.70192e-151	P8_CD8+Naive	TMEM243
PPA12	6.92082e-154	0.43811	0.589	0.318	9.25244e-150	P8_CD8+Naive	PPA1
ST13	2.33286e-153	0.458915	0.722	0.464	3.1188e-149	P8_CD8+Naive	ST13
CD3G4	9.66893e-151	0.356471	0.84	0.505	1.29264e-146	P8_CD8+Naive	CD3G
FOSB3	1.21599e-149	0.429259	0.559	0.295	1.62565e-145	P8_CD8+Naive	FOSB
NSA22	2.89556e-146	0.428914	0.785	0.532	3.87107e-142	P8_CD8+Naive	NSA2
PNISR	7.10636e-146	0.374724	0.9	0.713	9.50049e-142	P8_CD8+Naive	PNISR
JAML1	1.43353e-145	0.361542	0.312	0.12	1.91648e-141	P8_CD8+Naive	JAML
TOMM201	2.26536e-143	0.417169	0.752	0.495	3.02856e-139	P8_CD8+Naive	TOMM20
APEX1	1.95995e-140	0.436205	0.557	0.308	2.62026e-136	P8_CD8+Naive	APEX1
SMAP2	1.12343e-137	0.378722	0.698	0.437	1.50191e-133	P8_CD8+Naive	SMAP2
NFKBIZ1	2.27424e-137	0.42502	0.34	0.144	3.04043e-133	P8_CD8+Naive	NFKBIZ
SUSD32	5.78097e-137	0.366424	0.315	0.126	7.72858e-133	P8_CD8+Naive	SUSD3
RHOH1	2.95683e-136	0.429093	0.553	0.299	3.95298e-132	P8_CD8+Naive	RHOH
GYPC1	1.04477e-135	0.401027	0.789	0.544	1.39675e-131	P8_CD8+Naive	GYPC
MGAT4A1	2.30008e-135	0.398762	0.65	0.383	3.07498e-131	P8_CD8+Naive	MGAT4A
YPEL21	8.1449e-130	0.329124	0.251	0.092	1.08889e-125	P8_CD8+Naive	YPEL2
TXK2	1.52467e-129	0.369916	0.584	0.312	2.03833e-125	P8_CD8+Naive	TXK
STK17B2	3.49074e-129	0.403878	0.768	0.537	4.66676e-125	P8_CD8+Naive	STK17B
APBA2	4.09056e-127	0.327353	0.278	0.105	5.46867e-123	P8_CD8+Naive	APBA2
SPTBN12	2.15763e-126	0.416285	0.457	0.233	2.88454e-122	P8_CD8+Naive	SPTBN1
BEX2	6.54707e-125	0.347661	0.28	0.11	8.75278e-121	P8_CD8+Naive	BEX2
CLUAP1	1.09219e-122	0.350949	0.251	0.094	1.46015e-118	P8_CD8+Naive	CLUAP1
STMN31	6.8141e-122	0.343332	0.332	0.144	9.10977e-118	P8_CD8+Naive	STMN3
ETS13	3.09472e-120	0.390521	0.854	0.648	4.13734e-116	P8_CD8+Naive	ETS1
FBL	4.46405e-120	0.391949	0.619	0.378	5.96799e-116	P8_CD8+Naive	FBL
SERP11	1.2428e-117	0.339615	0.806	0.574	1.6615e-113	P8_CD8+Naive	SERP1
FBXO32	2.59478e-117	0.435617	0.328	0.146	3.46896e-113	P8_CD8+Naive	FBXO32
RIPOR22	4.48461e-116	0.384266	0.86	0.68	5.99547e-112	P8_CD8+Naive	RIPOR2
PABPC41	1.33723e-115	0.370814	0.377	0.179	1.78774e-111	P8_CD8+Naive	PABPC4
PSIP11	1.38661e-114	0.404129	0.668	0.429	1.85375e-110	P8_CD8+Naive	PSIP1
FYB13	2.21942e-114	0.330624	0.887	0.692	2.96714e-110	P8_CD8+Naive	FYB1
1961-09-01	3.88226e-113	0.366269	0.777	0.538	5.19019e-109	P8_CD8+Naive	2021-09-06
MLLT31	3.39961e-112	0.33927	0.315	0.137	4.54494e-108	P8_CD8+Naive	MLLT3
IMPDH21	5.36501e-109	0.349868	0.325	0.147	7.17248e-105	P8_CD8+Naive	IMPDH2
FOS3	3.19495e-107	0.401349	0.738	0.521	4.27133e-103	P8_CD8+Naive	FOS
C1QBP1	4.31568e-107	0.350687	0.613	0.381	5.76964e-103	P8_CD8+Naive	C1QBP
PPP1R21	7.4127e-107	0.348929	0.673	0.431	9.91004e-103	P8_CD8+Naive	PPP1R2
SF1	7.8276e-106	0.337525	0.812	0.607	1.04647e-101	P8_CD8+Naive	SF1
FOXO1	1.64104e-104	0.332851	0.255	0.105	2.19391e-100	P8_CD8+Naive	FOXO1
SGTB1	8.28149e-101	0.338557	0.272	0.117	1.10715e-96	P8_CD8+Naive	SGTB
ITK2	3.04741e-98	0.338001	0.535	0.315	4.07408e-94	P8_CD8+Naive	ITK
IPCEF11	9.947e-97	0.354849	0.375	0.191	1.32981e-92	P8_CD8+Naive	IPCEF1
SELENOH	7.7627e-96	0.336591	0.666	0.442	1.0378e-91	P8_CD8+Naive	SELENOH
ORMDL3	1.53515e-95	0.32565	0.359	0.179	2.05235e-91	P8_CD8+Naive	ORMDL3
GIMAP11	6.44883e-95	0.352553	0.609	0.384	8.62144e-91	P8_CD8+Naive	GIMAP1
ZNF331	6.90025e-95	0.32608	0.287	0.129	9.22494e-91	P8_CD8+Naive	ZNF331
RBL2	2.01006e-94	0.344711	0.634	0.41	2.68725e-90	P8_CD8+Naive	RBL2
CLEC2D2	4.14507e-94	0.330054	0.694	0.471	5.54155e-90	P8_CD8+Naive	CLEC2D
SEMA4D	1.89876e-93	0.365662	0.559	0.346	2.53845e-89	P8_CD8+Naive	SEMA4D
CARS1	2.93657e-93	0.329952	0.28	0.126	3.9259e-89	P8_CD8+Naive	CARS
CISH1	5.70449e-93	0.404352	0.263	0.115	7.62633e-89	P8_CD8+Naive	CISH
KLF13	1.47476e-91	0.33602	0.673	0.449	1.97161e-87	P8_CD8+Naive	KLF13
UBALD2	2.83703e-91	0.350494	0.461	0.261	3.79282e-87	P8_CD8+Naive	UBALD2
TMPO1	6.16097e-91	0.323888	0.562	0.346	8.2366e-87	P8_CD8+Naive	TMPO
CBX51	7.34489e-91	0.34062	0.371	0.193	9.81938e-87	P8_CD8+Naive	CBX5
FLT3LG2	2.53268e-90	0.372097	0.38	0.196	3.38594e-86	P8_CD8+Naive	FLT3LG
LINS1	8.55047e-89	0.322603	0.317	0.154	1.14311e-84	P8_CD8+Naive	LINS1
DDX3X	1.78606e-87	0.333936	0.72	0.508	2.38778e-83	P8_CD8+Naive	DDX3X
CHD31	4.58203e-87	0.348022	0.479	0.283	6.12571e-83	P8_CD8+Naive	CHD3
PHF31	1.71574e-85	0.339	0.562	0.356	2.29378e-81	P8_CD8+Naive	PHF3
TNRC6B2	3.53345e-84	0.327533	0.683	0.478	4.72387e-80	P8_CD8+Naive	TNRC6B
LARS	2.47898e-83	0.348289	0.435	0.249	3.31415e-79	P8_CD8+Naive	LARS
CDK6	1.55931e-77	0.362073	0.301	0.152	2.08464e-73	P8_CD8+Naive	CDK6
UBTF	1.16223e-76	0.32303	0.49	0.3	1.55378e-72	P8_CD8+Naive	UBTF
SESTD1	0	0.888691	0.367	0.024	0	P9_CD4-CD8-_GZMK+	SESTD1
MYB	0	0.791804	0.312	0.008	0	P9_CD4-CD8-_GZMK+	MYB
GZMK3	1.03071e-302	1.86399	0.938	0.229	1.37796e-298	P9_CD4-CD8-_GZMK+	GZMK
PGM2L1	2.51065e-270	1.09709	0.529	0.069	3.35649e-266	P9_CD4-CD8-_GZMK+	PGM2L1
CD273	9.7849e-233	1.58656	0.914	0.308	1.30814e-228	P9_CD4-CD8-_GZMK+	CD27
CTLA41	6.97968e-210	0.721177	0.344	0.037	9.33114e-206	P9_CD4-CD8-_GZMK+	CTLA4
CHI3L2	2.34295e-199	0.882107	0.383	0.047	3.13228e-195	P9_CD4-CD8-_GZMK+	CHI3L2
MYL6B1	3.66592e-191	0.687211	0.346	0.041	4.90097e-187	P9_CD4-CD8-_GZMK+	MYL6B
GPR183	1.53634e-184	1.28083	0.74	0.195	2.05393e-180	P9_CD4-CD8-_GZMK+	GPR183
FGFR1	4.096e-179	0.764456	0.297	0.032	5.47594e-175	P9_CD4-CD8-_GZMK+	FGFR1
NUCB21	2.08104e-167	1.34427	0.852	0.333	2.78215e-163	P9_CD4-CD8-_GZMK+	NUCB2
LGALS31	5.93925e-156	1.22703	0.583	0.137	7.94018e-152	P9_CD4-CD8-_GZMK+	LGALS3
FABP51	4.35496e-146	0.813224	0.487	0.095	5.82215e-142	P9_CD4-CD8-_GZMK+	FABP5
FCMR1	5.88882e-137	1.12711	0.805	0.307	7.87276e-133	P9_CD4-CD8-_GZMK+	FCMR
TIGIT2	1.78714e-129	1.01235	0.669	0.198	2.38923e-125	P9_CD4-CD8-_GZMK+	TIGIT
ISG201	6.35911e-126	1.03656	0.938	0.582	8.50149e-122	P9_CD4-CD8-_GZMK+	ISG20
MPP1	5.15048e-123	0.519224	0.268	0.036	6.88568e-119	P9_CD4-CD8-_GZMK+	MPP1
CCNG2	1.00909e-113	0.498585	0.312	0.05	1.34905e-109	P9_CD4-CD8-_GZMK+	CCNG2
HAVCR21	7.62364e-113	0.827709	0.479	0.112	1.0192e-108	P9_CD4-CD8-_GZMK+	HAVCR2
LYST1	2.12598e-104	0.867042	0.68	0.233	2.84223e-100	P9_CD4-CD8-_GZMK+	LYST
SESN3	1.16932e-101	0.957013	0.461	0.118	1.56327e-97	P9_CD4-CD8-_GZMK+	SESN3
S1PR41	6.30374e-95	0.958151	0.794	0.385	8.42746e-91	P9_CD4-CD8-_GZMK+	S1PR4
GMFG	1.59793e-92	0.720365	0.951	0.806	2.13627e-88	P9_CD4-CD8-_GZMK+	GMFG
LIMD2	1.14422e-91	0.89628	0.948	0.73	1.52971e-87	P9_CD4-CD8-_GZMK+	LIMD2
PECAM1	4.90697e-90	0.572122	0.461	0.117	6.56013e-86	P9_CD4-CD8-_GZMK+	PECAM1
SIRPG	1.15169e-88	0.668828	0.396	0.094	1.53969e-84	P9_CD4-CD8-_GZMK+	SIRPG
CD281	2.89364e-88	0.645575	0.503	0.143	3.86851e-84	P9_CD4-CD8-_GZMK+	CD28
MCUB1	4.14972e-88	0.807794	0.755	0.336	5.54776e-84	P9_CD4-CD8-_GZMK+	MCUB
ANTXR2	1.21466e-87	0.660911	0.372	0.086	1.62388e-83	P9_CD4-CD8-_GZMK+	ANTXR2
CNN21	2.46293e-87	0.944129	0.823	0.423	3.2927e-83	P9_CD4-CD8-_GZMK+	CNN2
CD3D3	1.51364e-85	0.742989	0.971	0.607	2.02359e-81	P9_CD4-CD8-_GZMK+	CD3D
CLDND12	4.61531e-85	0.986773	0.581	0.207	6.17021e-81	P9_CD4-CD8-_GZMK+	CLDND1
TMSB4X	1.55695e-84	0.66486	1	0.998	2.08149e-80	P9_CD4-CD8-_GZMK+	TMSB4X
2021-09-06	6.07754e-84	0.855865	0.854	0.545	8.12507e-80	P9_CD4-CD8-_GZMK+	2021-09-06
CMTM71	2.57476e-83	0.643888	0.479	0.135	3.4422e-79	P9_CD4-CD8-_GZMK+	CMTM7
SNX9	1.357e-82	0.475657	0.292	0.058	1.81418e-78	P9_CD4-CD8-_GZMK+	SNX9
DENND2D	7.96254e-82	0.837612	0.714	0.321	1.06451e-77	P9_CD4-CD8-_GZMK+	DENND2D
SH2D1A1	5.57018e-81	0.786653	0.674	0.269	7.44677e-77	P9_CD4-CD8-_GZMK+	SH2D1A
COTL14	1.29206e-78	0.902347	0.802	0.409	1.72735e-74	P9_CD4-CD8-_GZMK+	COTL1
ACTG11	3.01751e-78	0.918769	0.987	0.932	4.0341e-74	P9_CD4-CD8-_GZMK+	ACTG1
[truncated: 215 more rows]

## Sheet: DEG
Gene	p_val	avg_logFC	pct.1	pct.2	p_val_adj	cluster	gene	diff	celltype
HIST1H1D	4.21797e-226	1.20601	0.525	0.139	5.63901e-222	GBM.pembro.PBMC	HIST1H1D	0.386	P1_CD8+GZMB+GZMH+
HIST1H1E	4.52654e-229	1.06802	0.594	0.187	6.05153e-225	GBM.pembro.PBMC	HIST1H1E	0.407	P1_CD8+GZMB+GZMH+
SYNE2	3.8687e-237	0.877425	0.79	0.442	5.17207e-233	GBM.pembro.PBMC	SYNE2	0.348	P1_CD8+GZMB+GZMH+
JUND	2.37117e-284	0.875747	0.661	0.182	3.17002e-280	GBM.pembro.PBMC	JUND	0.479	P1_CD8+GZMB+GZMH+
ARL4C	1.05543e-256	0.818085	0.807	0.456	1.41101e-252	GBM.pembro.PBMC	ARL4C	0.351	P1_CD8+GZMB+GZMH+
BRD7	9.21546e-197	0.814546	0.439	0.085	1.23201e-192	GBM.pembro.PBMC	BRD7	0.354	P1_CD8+GZMB+GZMH+
CD81	3.49665e-226	0.792915	0.59	0.168	4.67467e-222	GBM.pembro.PBMC	CD81	0.422	P1_CD8+GZMB+GZMH+
HIST1H1C	2.07837e-162	0.784089	0.423	0.105	2.77857e-158	GBM.pembro.PBMC	HIST1H1C	0.318	P1_CD8+GZMB+GZMH+
KLF2	4.67369e-226	0.746911	0.801	0.481	6.24825e-222	GBM.pembro.PBMC	KLF2	0.32	P1_CD8+GZMB+GZMH+
KIAA1551	7.88341e-162	0.71295	0.697	0.367	1.05393e-157	GBM.pembro.PBMC	KIAA1551	0.33	P1_CD8+GZMB+GZMH+
KLF13	1.18404e-190	0.696372	0.608	0.221	1.58294e-186	GBM.pembro.PBMC	KLF13	0.387	P1_CD8+GZMB+GZMH+
HIST1H4C	6.26225e-138	0.687169	0.584	0.264	8.37201e-134	GBM.pembro.PBMC	HIST1H4C	0.32	P1_CD8+GZMB+GZMH+
BPTF	4.57471e-146	0.686387	0.565	0.233	6.11592e-142	GBM.pembro.PBMC	BPTF	0.332	P1_CD8+GZMB+GZMH+
SLFN5	3.15303e-153	0.685607	0.629	0.289	4.21529e-149	GBM.pembro.PBMC	SLFN5	0.34	P1_CD8+GZMB+GZMH+
PRPF4B	5.52695e-153	0.677383	0.548	0.21	7.38898e-149	GBM.pembro.PBMC	PRPF4B	0.338	P1_CD8+GZMB+GZMH+
HIST2H2AC	5.95342e-138	0.674591	0.338	0.069	7.95913e-134	GBM.pembro.PBMC	HIST2H2AC	0.269	P1_CD8+GZMB+GZMH+
BOD1L1	5.3325e-152	0.668645	0.471	0.143	7.12902e-148	GBM.pembro.PBMC	BOD1L1	0.328	P1_CD8+GZMB+GZMH+
SRRM2	6.33363e-186	0.663047	0.736	0.367	8.46743e-182	GBM.pembro.PBMC	SRRM2	0.369	P1_CD8+GZMB+GZMH+
VPS13C	2.81458e-153	0.6617	0.542	0.204	3.76281e-149	GBM.pembro.PBMC	VPS13C	0.338	P1_CD8+GZMB+GZMH+
UTRN	5.43496e-141	0.655305	0.581	0.25	7.266e-137	GBM.pembro.PBMC	UTRN	0.331	P1_CD8+GZMB+GZMH+
KMT2A	1.01387e-134	0.654293	0.5	0.184	1.35545e-130	GBM.pembro.PBMC	KMT2A	0.316	P1_CD8+GZMB+GZMH+
PCM1	6.17539e-135	0.649107	0.533	0.212	8.25588e-131	GBM.pembro.PBMC	PCM1	0.321	P1_CD8+GZMB+GZMH+
SYNE1	1.18238e-139	0.634653	0.692	0.38	1.58073e-135	GBM.pembro.PBMC	SYNE1	0.312	P1_CD8+GZMB+GZMH+
GCC2	1.11479e-133	0.633724	0.545	0.229	1.49036e-129	GBM.pembro.PBMC	GCC2	0.316	P1_CD8+GZMB+GZMH+
ANKRD11	1.46139e-145	0.633179	0.525	0.194	1.95374e-141	GBM.pembro.PBMC	ANKRD11	0.331	P1_CD8+GZMB+GZMH+
MACF1	5.51233e-132	0.628649	0.627	0.307	7.36943e-128	GBM.pembro.PBMC	MACF1	0.32	P1_CD8+GZMB+GZMH+
GLS	1.07342e-139	0.627769	0.448	0.138	1.43506e-135	GBM.pembro.PBMC	GLS	0.31	P1_CD8+GZMB+GZMH+
GOLGB1	6.28908e-99	0.619703	0.346	0.11	8.40787e-95	GBM.pembro.PBMC	GOLGB1	0.236	P1_CD8+GZMB+GZMH+
PTPRC	1.54237e-243	0.617886	0.929	0.815	2.06199e-239	GBM.pembro.PBMC	PTPRC	0.114	P1_CD8+GZMB+GZMH+
ETS1	2.53249e-156	0.612812	0.736	0.428	3.38569e-152	GBM.pembro.PBMC	ETS1	0.308	P1_CD8+GZMB+GZMH+
ARID1B	7.77581e-126	0.609204	0.432	0.14	1.03955e-121	GBM.pembro.PBMC	ARID1B	0.292	P1_CD8+GZMB+GZMH+
CEMIP2	3.21467e-93	0.603011	0.423	0.178	4.2977e-89	GBM.pembro.PBMC	CEMIP2	0.245	P1_CD8+GZMB+GZMH+
CDV3	9.82104e-155	0.595796	0.483	0.15	1.31297e-150	GBM.pembro.PBMC	CDV3	0.333	P1_CD8+GZMB+GZMH+
MYBL1	1.30324e-102	0.594463	0.407	0.15	1.74231e-98	GBM.pembro.PBMC	MYBL1	0.257	P1_CD8+GZMB+GZMH+
TUT4	1.167e-119	0.587357	0.436	0.149	1.56016e-115	GBM.pembro.PBMC	TUT4	0.287	P1_CD8+GZMB+GZMH+
IQGAP2	6.67309e-121	0.579236	0.542	0.231	8.92125e-117	GBM.pembro.PBMC	IQGAP2	0.311	P1_CD8+GZMB+GZMH+
TPR	1.04094e-117	0.577434	0.598	0.295	1.39164e-113	GBM.pembro.PBMC	TPR	0.303	P1_CD8+GZMB+GZMH+
TRAPPC10	5.10337e-120	0.569596	0.35	0.092	6.8227e-116	GBM.pembro.PBMC	TRAPPC10	0.258	P1_CD8+GZMB+GZMH+
AKAP9	5.32174e-102	0.569303	0.52	0.238	7.11464e-98	GBM.pembro.PBMC	AKAP9	0.282	P1_CD8+GZMB+GZMH+
EPB41	1.41754e-120	0.56788	0.536	0.231	1.89511e-116	GBM.pembro.PBMC	EPB41	0.305	P1_CD8+GZMB+GZMH+
FAM107B	8.61913e-114	0.567306	0.584	0.286	1.15229e-109	GBM.pembro.PBMC	FAM107B	0.298	P1_CD8+GZMB+GZMH+
GOLGA4	8.00342e-96	0.562427	0.474	0.212	1.06998e-91	GBM.pembro.PBMC	GOLGA4	0.262	P1_CD8+GZMB+GZMH+
ATM	2.34842e-134	0.559766	0.66	0.324	3.1396e-130	GBM.pembro.PBMC	ATM	0.336	P1_CD8+GZMB+GZMH+
PIK3R1	1.00824e-95	0.559384	0.56	0.287	1.34791e-91	GBM.pembro.PBMC	PIK3R1	0.273	P1_CD8+GZMB+GZMH+
CEP350	1.98013e-105	0.545877	0.386	0.13	2.64724e-101	GBM.pembro.PBMC	CEP350	0.256	P1_CD8+GZMB+GZMH+
PNN	9.29069e-124	0.544583	0.61	0.294	1.24207e-119	GBM.pembro.PBMC	PNN	0.316	P1_CD8+GZMB+GZMH+
URI1	9.69388e-131	0.544248	0.409	0.117	1.29597e-126	GBM.pembro.PBMC	URI1	0.292	P1_CD8+GZMB+GZMH+
RIPOR2	5.44671e-130	0.541785	0.751	0.481	7.28171e-126	GBM.pembro.PBMC	RIPOR2	0.27	P1_CD8+GZMB+GZMH+
ATRX	6.24415e-103	0.541407	0.602	0.32	8.3478e-99	GBM.pembro.PBMC	ATRX	0.282	P1_CD8+GZMB+GZMH+
TRGC2	2.89453e-92	0.537834	0.573	0.299	3.8697e-88	GBM.pembro.PBMC	TRGC2	0.274	P1_CD8+GZMB+GZMH+
IKZF3	5.1758e-104	0.534118	0.569	0.28	6.91953e-100	GBM.pembro.PBMC	IKZF3	0.289	P1_CD8+GZMB+GZMH+
SCAF11	2.36367e-110	0.532329	0.597	0.301	3.16e-106	GBM.pembro.PBMC	SCAF11	0.296	P1_CD8+GZMB+GZMH+
SOS1	8.68864e-105	0.530301	0.262	0.05	1.16158e-100	GBM.pembro.PBMC	SOS1	0.212	P1_CD8+GZMB+GZMH+
CD84	9.12957e-82	0.52863	0.338	0.123	1.22053e-77	GBM.pembro.PBMC	CD84	0.215	P1_CD8+GZMB+GZMH+
RNF19A	6.34586e-89	0.525507	0.405	0.162	8.48379e-85	GBM.pembro.PBMC	RNF19A	0.243	P1_CD8+GZMB+GZMH+
ATF7IP	4.50828e-99	0.524376	0.44	0.175	6.02712e-95	GBM.pembro.PBMC	ATF7IP	0.265	P1_CD8+GZMB+GZMH+
GNAS	2.2161e-145	0.523316	0.681	0.343	2.9627e-141	GBM.pembro.PBMC	GNAS	0.338	P1_CD8+GZMB+GZMH+
NUFIP2	2.97913e-100	0.523039	0.313	0.085	3.9828e-96	GBM.pembro.PBMC	NUFIP2	0.228	P1_CD8+GZMB+GZMH+
DHX36	3.89829e-96	0.518622	0.441	0.179	5.21162e-92	GBM.pembro.PBMC	DHX36	0.262	P1_CD8+GZMB+GZMH+
SMARCA5	1.23127e-105	0.517628	0.433	0.161	1.64609e-101	GBM.pembro.PBMC	SMARCA5	0.272	P1_CD8+GZMB+GZMH+
DDX17	1.65378e-117	0.517609	0.665	0.364	2.21094e-113	GBM.pembro.PBMC	DDX17	0.301	P1_CD8+GZMB+GZMH+
TLE4	1.04291e-93	0.516393	0.363	0.123	1.39427e-89	GBM.pembro.PBMC	TLE4	0.24	P1_CD8+GZMB+GZMH+
TOP1	2.059e-95	0.510636	0.382	0.136	2.75268e-91	GBM.pembro.PBMC	TOP1	0.246	P1_CD8+GZMB+GZMH+
ZRANB2	2.9507e-105	0.509386	0.505	0.219	3.94479e-101	GBM.pembro.PBMC	ZRANB2	0.286	P1_CD8+GZMB+GZMH+
SAMD9	4.91318e-91	0.508526	0.396	0.151	6.56843e-87	GBM.pembro.PBMC	SAMD9	0.245	P1_CD8+GZMB+GZMH+
RORA	4.01204e-104	0.505404	0.568	0.274	5.36369e-100	GBM.pembro.PBMC	RORA	0.294	P1_CD8+GZMB+GZMH+
BDP1	3.60303e-87	0.505317	0.396	0.158	4.81689e-83	GBM.pembro.PBMC	BDP1	0.238	P1_CD8+GZMB+GZMH+
TRIP12	5.2244e-97	0.503688	0.357	0.117	6.98451e-93	GBM.pembro.PBMC	TRIP12	0.24	P1_CD8+GZMB+GZMH+
NEAT1	2.35326e-133	0.502986	0.833	0.585	3.14608e-129	GBM.pembro.PBMC	NEAT1	0.248	P1_CD8+GZMB+GZMH+
AAK1	5.14051e-112	0.502778	0.642	0.336	6.87235e-108	GBM.pembro.PBMC	AAK1	0.306	P1_CD8+GZMB+GZMH+
TM9SF3	1.71536e-100	0.498798	0.332	0.097	2.29326e-96	GBM.pembro.PBMC	TM9SF3	0.235	P1_CD8+GZMB+GZMH+
CDK13	3.03184e-102	0.495785	0.444	0.171	4.05327e-98	GBM.pembro.PBMC	CDK13	0.273	P1_CD8+GZMB+GZMH+
SMCHD1	1.82342e-101	0.492997	0.587	0.3	2.43774e-97	GBM.pembro.PBMC	SMCHD1	0.287	P1_CD8+GZMB+GZMH+
KIF2A	4.92897e-96	0.49226	0.5	0.225	6.58955e-92	GBM.pembro.PBMC	KIF2A	0.275	P1_CD8+GZMB+GZMH+
TLN1	1.90679e-111	0.491856	0.659	0.357	2.54919e-107	GBM.pembro.PBMC	TLN1	0.302	P1_CD8+GZMB+GZMH+
RAB8B	2.62079e-100	0.490238	0.401	0.145	3.50373e-96	GBM.pembro.PBMC	RAB8B	0.256	P1_CD8+GZMB+GZMH+
EIF3A	1.47622e-98	0.489485	0.572	0.288	1.97356e-94	GBM.pembro.PBMC	EIF3A	0.284	P1_CD8+GZMB+GZMH+
XRN1	3.81529e-101	0.487881	0.409	0.15	5.10066e-97	GBM.pembro.PBMC	XRN1	0.259	P1_CD8+GZMB+GZMH+
PHF3	3.31257e-91	0.484054	0.422	0.171	4.42857e-87	GBM.pembro.PBMC	PHF3	0.251	P1_CD8+GZMB+GZMH+
RASGRP1	5.22238e-87	0.483441	0.405	0.162	6.9818e-83	GBM.pembro.PBMC	RASGRP1	0.243	P1_CD8+GZMB+GZMH+
MAP2K2	9.61033e-123	0.483419	0.396	0.115	1.28481e-118	GBM.pembro.PBMC	MAP2K2	0.281	P1_CD8+GZMB+GZMH+
BCLAF1	2.73754e-92	0.481227	0.519	0.245	3.65982e-88	GBM.pembro.PBMC	BCLAF1	0.274	P1_CD8+GZMB+GZMH+
PYHIN1	1.84377e-83	0.480515	0.617	0.353	2.46493e-79	GBM.pembro.PBMC	PYHIN1	0.264	P1_CD8+GZMB+GZMH+
ERBIN	2.52286e-90	0.480339	0.398	0.153	3.37281e-86	GBM.pembro.PBMC	ERBIN	0.245	P1_CD8+GZMB+GZMH+
H1FX	5.52453e-73	0.479872	0.344	0.135	7.38575e-69	GBM.pembro.PBMC	H1FX	0.209	P1_CD8+GZMB+GZMH+
BCL11B	1.42762e-91	0.479124	0.402	0.155	1.90858e-87	GBM.pembro.PBMC	BCL11B	0.247	P1_CD8+GZMB+GZMH+
ARAP2	1.20686e-88	0.478636	0.438	0.187	1.61344e-84	GBM.pembro.PBMC	ARAP2	0.251	P1_CD8+GZMB+GZMH+
DDX3X	6.13276e-112	0.47673	0.568	0.261	8.19889e-108	GBM.pembro.PBMC	DDX3X	0.307	P1_CD8+GZMB+GZMH+
OSBPL8	4.26239e-81	0.474908	0.488	0.237	5.69839e-77	GBM.pembro.PBMC	OSBPL8	0.251	P1_CD8+GZMB+GZMH+
CD226	4.35831e-76	0.472145	0.322	0.115	5.82663e-72	GBM.pembro.PBMC	CD226	0.207	P1_CD8+GZMB+GZMH+
TMF1	3.63833e-77	0.471589	0.368	0.149	4.86408e-73	GBM.pembro.PBMC	TMF1	0.219	P1_CD8+GZMB+GZMH+
ITGA4	7.89744e-86	0.470098	0.631	0.365	1.05581e-81	GBM.pembro.PBMC	ITGA4	0.266	P1_CD8+GZMB+GZMH+
FNBP1	7.93438e-89	0.469091	0.616	0.341	1.06075e-84	GBM.pembro.PBMC	FNBP1	0.275	P1_CD8+GZMB+GZMH+
CHD4	1.0749e-74	0.46898	0.38	0.161	1.43704e-70	GBM.pembro.PBMC	CHD4	0.219	P1_CD8+GZMB+GZMH+
MYCBP2	2.80335e-98	0.468841	0.505	0.229	3.74779e-94	GBM.pembro.PBMC	MYCBP2	0.276	P1_CD8+GZMB+GZMH+
ANKRD36C	4.13988e-84	0.468596	0.294	0.087	5.5346e-80	GBM.pembro.PBMC	ANKRD36C	0.207	P1_CD8+GZMB+GZMH+
CUL3	4.25376e-91	0.468073	0.3	0.085	5.68685e-87	GBM.pembro.PBMC	CUL3	0.215	P1_CD8+GZMB+GZMH+
DNAJC21	2.09408e-82	0.467117	0.267	0.073	2.79957e-78	GBM.pembro.PBMC	DNAJC21	0.194	P1_CD8+GZMB+GZMH+
MBP	4.85434e-93	0.466545	0.704	0.447	6.48976e-89	GBM.pembro.PBMC	MBP	0.257	P1_CD8+GZMB+GZMH+
SUZ12	2.5419e-85	0.463297	0.323	0.105	3.39826e-81	GBM.pembro.PBMC	SUZ12	0.218	P1_CD8+GZMB+GZMH+
ARFGEF1	1.42245e-91	0.462553	0.298	0.083	1.90167e-87	GBM.pembro.PBMC	ARFGEF1	0.215	P1_CD8+GZMB+GZMH+
APOL6	2.2297e-79	0.46203	0.422	0.185	2.98089e-75	GBM.pembro.PBMC	APOL6	0.237	P1_CD8+GZMB+GZMH+
SUPT16H	5.31046e-84	0.459651	0.384	0.151	7.09955e-80	GBM.pembro.PBMC	SUPT16H	0.233	P1_CD8+GZMB+GZMH+
STAG2	8.9402e-92	0.459557	0.401	0.154	1.19522e-87	GBM.pembro.PBMC	STAG2	0.247	P1_CD8+GZMB+GZMH+
R3HDM2	6.663e-90	0.458973	0.317	0.095	8.90777e-86	GBM.pembro.PBMC	R3HDM2	0.222	P1_CD8+GZMB+GZMH+
RNF213	8.40202e-114	0.457621	0.792	0.549	1.12327e-109	GBM.pembro.PBMC	RNF213	0.243	P1_CD8+GZMB+GZMH+
PRKDC	8.01052e-86	0.457617	0.391	0.153	1.07093e-81	GBM.pembro.PBMC	PRKDC	0.238	P1_CD8+GZMB+GZMH+
HP1BP3	2.9755e-84	0.457238	0.61	0.352	3.97795e-80	GBM.pembro.PBMC	HP1BP3	0.258	P1_CD8+GZMB+GZMH+
CCNL1	1.44591e-99	0.457199	0.612	0.316	1.93303e-95	GBM.pembro.PBMC	CCNL1	0.296	P1_CD8+GZMB+GZMH+
PJA2	9.88535e-81	0.456794	0.36	0.135	1.32157e-76	GBM.pembro.PBMC	PJA2	0.225	P1_CD8+GZMB+GZMH+
DDHD1	1.25814e-84	0.456407	0.339	0.116	1.682e-80	GBM.pembro.PBMC	DDHD1	0.223	P1_CD8+GZMB+GZMH+
ANKRD12	3.13188e-88	0.45251	0.678	0.431	4.18701e-84	GBM.pembro.PBMC	ANKRD12	0.247	P1_CD8+GZMB+GZMH+
SYNRG	1.48843e-83	0.451664	0.456	0.207	1.98988e-79	GBM.pembro.PBMC	SYNRG	0.249	P1_CD8+GZMB+GZMH+
TOP2B	4.83875e-85	0.446377	0.355	0.128	6.46892e-81	GBM.pembro.PBMC	TOP2B	0.227	P1_CD8+GZMB+GZMH+
NIN	1.74058e-80	0.446298	0.38	0.151	2.32698e-76	GBM.pembro.PBMC	NIN	0.229	P1_CD8+GZMB+GZMH+
ZNF292	1.66421e-72	0.442949	0.381	0.163	2.22489e-68	GBM.pembro.PBMC	ZNF292	0.218	P1_CD8+GZMB+GZMH+
PRRC2C	5.33573e-104	0.442016	0.723	0.448	7.13333e-100	GBM.pembro.PBMC	PRRC2C	0.275	P1_CD8+GZMB+GZMH+
MBD2	5.76567e-96	0.441033	0.309	0.086	7.70812e-92	GBM.pembro.PBMC	MBD2	0.223	P1_CD8+GZMB+GZMH+
SAMD9L	2.72208e-67	0.440149	0.318	0.123	3.63915e-63	GBM.pembro.PBMC	SAMD9L	0.195	P1_CD8+GZMB+GZMH+
CX3CR1	1.05872e-55	0.437174	0.491	0.287	1.41541e-51	GBM.pembro.PBMC	CX3CR1	0.204	P1_CD8+GZMB+GZMH+
ZBTB7A	5.47956e-73	0.436953	0.357	0.141	7.32562e-69	GBM.pembro.PBMC	ZBTB7A	0.216	P1_CD8+GZMB+GZMH+
NKTR	7.03006e-88	0.435713	0.53	0.257	9.39849e-84	GBM.pembro.PBMC	NKTR	0.273	P1_CD8+GZMB+GZMH+
DDX24	1.49612e-88	0.434001	0.663	0.387	2.00017e-84	GBM.pembro.PBMC	DDX24	0.276	P1_CD8+GZMB+GZMH+
PLCG2	2.4373e-79	0.432558	0.281	0.083	3.25842e-75	GBM.pembro.PBMC	PLCG2	0.198	P1_CD8+GZMB+GZMH+
SF3B1	3.4294e-89	0.431773	0.637	0.362	4.58477e-85	GBM.pembro.PBMC	SF3B1	0.275	P1_CD8+GZMB+GZMH+
WNK1	1.87146e-76	0.43133	0.43	0.192	2.50196e-72	GBM.pembro.PBMC	WNK1	0.238	P1_CD8+GZMB+GZMH+
GBP1	4.63296e-57	0.431049	0.321	0.141	6.19381e-53	GBM.pembro.PBMC	GBP1	0.18	P1_CD8+GZMB+GZMH+
ROCK1	2.02345e-77	0.430901	0.561	0.308	2.70514e-73	GBM.pembro.PBMC	ROCK1	0.253	P1_CD8+GZMB+GZMH+
PARP14	4.30952e-86	0.430678	0.354	0.124	5.76139e-82	GBM.pembro.PBMC	PARP14	0.23	P1_CD8+GZMB+GZMH+
RBM25	3.61993e-89	0.43066	0.612	0.336	4.83948e-85	GBM.pembro.PBMC	RBM25	0.276	P1_CD8+GZMB+GZMH+
PRDM1	1.03784e-69	0.429479	0.508	0.273	1.38749e-65	GBM.pembro.PBMC	PRDM1	0.235	P1_CD8+GZMB+GZMH+
ITGB1	2.3359e-77	0.429479	0.719	0.48	3.12286e-73	GBM.pembro.PBMC	ITGB1	0.239	P1_CD8+GZMB+GZMH+
DDX39B	4.71068e-77	0.427683	0.274	0.082	6.29771e-73	GBM.pembro.PBMC	DDX39B	0.192	P1_CD8+GZMB+GZMH+
LNPEP	2.24882e-70	0.427262	0.454	0.221	3.00645e-66	GBM.pembro.PBMC	LNPEP	0.233	P1_CD8+GZMB+GZMH+
TAX1BP1	6.31952e-76	0.423813	0.58	0.326	8.44857e-72	GBM.pembro.PBMC	TAX1BP1	0.254	P1_CD8+GZMB+GZMH+
KDM5A	3.61891e-74	0.421576	0.436	0.201	4.83812e-70	GBM.pembro.PBMC	KDM5A	0.235	P1_CD8+GZMB+GZMH+
CTDSPL2	9.20286e-81	0.419406	0.251	0.064	1.23033e-76	GBM.pembro.PBMC	CTDSPL2	0.187	P1_CD8+GZMB+GZMH+
SMC3	1.30899e-73	0.419292	0.386	0.163	1.75e-69	GBM.pembro.PBMC	SMC3	0.223	P1_CD8+GZMB+GZMH+
PPP1R12A	5.01813e-76	0.41549	0.572	0.322	6.70874e-72	GBM.pembro.PBMC	PPP1R12A	0.25	P1_CD8+GZMB+GZMH+
IKZF1	1.20805e-89	0.414217	0.71	0.446	1.61504e-85	GBM.pembro.PBMC	IKZF1	0.264	P1_CD8+GZMB+GZMH+
PDE3B	7.18027e-75	0.413618	0.272	0.081	9.5993e-71	GBM.pembro.PBMC	PDE3B	0.191	P1_CD8+GZMB+GZMH+
REL	6.82307e-63	0.409814	0.422	0.21	9.12177e-59	GBM.pembro.PBMC	REL	0.212	P1_CD8+GZMB+GZMH+
CCDC186	2.77658e-65	0.409561	0.321	0.128	3.71201e-61	GBM.pembro.PBMC	CCDC186	0.193	P1_CD8+GZMB+GZMH+
ASH1L	6.21299e-73	0.409346	0.354	0.142	8.30614e-69	GBM.pembro.PBMC	ASH1L	0.212	P1_CD8+GZMB+GZMH+
YTHDC1	7.44119e-75	0.409127	0.427	0.194	9.94813e-71	GBM.pembro.PBMC	YTHDC1	0.233	P1_CD8+GZMB+GZMH+
KANSL1	5.27145e-85	0.40794	0.458	0.202	7.04741e-81	GBM.pembro.PBMC	KANSL1	0.256	P1_CD8+GZMB+GZMH+
NIPBL	4.44726e-62	0.407777	0.418	0.207	5.94555e-58	GBM.pembro.PBMC	NIPBL	0.211	P1_CD8+GZMB+GZMH+
MALAT1	5.19812e-186	0.407233	1	1	6.94937e-182	GBM.pembro.PBMC	MALAT1	0	P1_CD8+GZMB+GZMH+
FBXW7	1.60224e-75	0.406566	0.275	0.084	2.14204e-71	GBM.pembro.PBMC	FBXW7	0.191	P1_CD8+GZMB+GZMH+
TMPO	8.61812e-99	0.406356	0.407	0.145	1.15216e-94	GBM.pembro.PBMC	TMPO	0.262	P1_CD8+GZMB+GZMH+
TTC14	1.09974e-72	0.405789	0.44	0.206	1.47025e-68	GBM.pembro.PBMC	TTC14	0.234	P1_CD8+GZMB+GZMH+
ARHGAP26	1.48123e-69	0.404533	0.291	0.102	1.98026e-65	GBM.pembro.PBMC	ARHGAP26	0.189	P1_CD8+GZMB+GZMH+
U2SURP	6.16816e-67	0.404251	0.472	0.241	8.24621e-63	GBM.pembro.PBMC	U2SURP	0.231	P1_CD8+GZMB+GZMH+
GIMAP1	4.87078e-72	0.403962	0.426	0.19	6.51175e-68	GBM.pembro.PBMC	GIMAP1	0.236	P1_CD8+GZMB+GZMH+
SAMD3	3.42646e-72	0.40366	0.646	0.404	4.58083e-68	GBM.pembro.PBMC	SAMD3	0.242	P1_CD8+GZMB+GZMH+
STK17A	1.20943e-72	0.403448	0.645	0.399	1.61689e-68	GBM.pembro.PBMC	STK17A	0.246	P1_CD8+GZMB+GZMH+
CEP78	4.28594e-50	0.402872	0.395	0.207	5.72987e-46	GBM.pembro.PBMC	CEP78	0.188	P1_CD8+GZMB+GZMH+
N4BP2L2	7.10294e-94	0.402799	0.721	0.444	9.49592e-90	GBM.pembro.PBMC	N4BP2L2	0.277	P1_CD8+GZMB+GZMH+
ZC3H13	3.13641e-67	0.402586	0.377	0.164	4.19307e-63	GBM.pembro.PBMC	ZC3H13	0.213	P1_CD8+GZMB+GZMH+
WAC	4.85233e-66	0.402141	0.383	0.17	6.48708e-62	GBM.pembro.PBMC	WAC	0.213	P1_CD8+GZMB+GZMH+
GBP5	2.74514e-56	0.398802	0.406	0.209	3.66998e-52	GBM.pembro.PBMC	GBP5	0.197	P1_CD8+GZMB+GZMH+
ZFC3H1	6.56484e-62	0.398193	0.295	0.113	8.77653e-58	GBM.pembro.PBMC	ZFC3H1	0.182	P1_CD8+GZMB+GZMH+
ARGLU1	1.05034e-94	0.398154	0.732	0.466	1.40419e-90	GBM.pembro.PBMC	ARGLU1	0.266	P1_CD8+GZMB+GZMH+
ZNF148	1.12164e-69	0.397845	0.337	0.132	1.49951e-65	GBM.pembro.PBMC	ZNF148	0.205	P1_CD8+GZMB+GZMH+
TACC1	2.97265e-55	0.397101	0.304	0.13	3.97414e-51	GBM.pembro.PBMC	TACC1	0.174	P1_CD8+GZMB+GZMH+
USP34	2.60565e-71	0.396999	0.375	0.16	3.4835e-67	GBM.pembro.PBMC	USP34	0.215	P1_CD8+GZMB+GZMH+
2021-03-07	4.21213e-72	0.396962	0.384	0.162	5.63119e-68	GBM.pembro.PBMC	2021-03-07	0.222	P1_CD8+GZMB+GZMH+
SON	3.7282e-103	0.395959	0.826	0.586	4.98423e-99	GBM.pembro.PBMC	SON	0.24	P1_CD8+GZMB+GZMH+
TGOLN2	1.84467e-71	0.395115	0.49	0.249	2.46613e-67	GBM.pembro.PBMC	TGOLN2	0.241	P1_CD8+GZMB+GZMH+
STAT1	1.04066e-51	0.394863	0.366	0.182	1.39126e-47	GBM.pembro.PBMC	STAT1	0.184	P1_CD8+GZMB+GZMH+
CFAP97	1.49108e-60	0.393176	0.309	0.125	1.99342e-56	GBM.pembro.PBMC	CFAP97	0.184	P1_CD8+GZMB+GZMH+
KAT6A	3.15835e-67	0.392725	0.308	0.114	4.2224e-63	GBM.pembro.PBMC	KAT6A	0.194	P1_CD8+GZMB+GZMH+
SETX	1.07098e-68	0.392174	0.382	0.169	1.4318e-64	GBM.pembro.PBMC	SETX	0.213	P1_CD8+GZMB+GZMH+
CDK12	2.22596e-65	0.391847	0.295	0.108	2.97588e-61	GBM.pembro.PBMC	CDK12	0.187	P1_CD8+GZMB+GZMH+
ATXN7L3B	7.70478e-63	0.391822	0.285	0.106	1.03005e-58	GBM.pembro.PBMC	ATXN7L3B	0.179	P1_CD8+GZMB+GZMH+
STK17B	1.13996e-76	0.391573	0.611	0.355	1.52401e-72	GBM.pembro.PBMC	STK17B	0.256	P1_CD8+GZMB+GZMH+
MIA3	2.19357e-58	0.388963	0.303	0.124	2.93258e-54	GBM.pembro.PBMC	MIA3	0.179	P1_CD8+GZMB+GZMH+
GTF2I	2.70283e-72	0.388888	0.386	0.163	3.61341e-68	GBM.pembro.PBMC	GTF2I	0.223	P1_CD8+GZMB+GZMH+
RSRC2	1.2001e-61	0.388249	0.425	0.209	1.60441e-57	GBM.pembro.PBMC	RSRC2	0.216	P1_CD8+GZMB+GZMH+
PRDM2	6.16422e-66	0.38593	0.337	0.138	8.24095e-62	GBM.pembro.PBMC	PRDM2	0.199	P1_CD8+GZMB+GZMH+
TRIM56	4.53129e-57	0.384987	0.285	0.113	6.05788e-53	GBM.pembro.PBMC	TRIM56	0.172	P1_CD8+GZMB+GZMH+
PIP4K2A	1.40965e-83	0.384662	0.594	0.304	1.88456e-79	GBM.pembro.PBMC	PIP4K2A	0.29	P1_CD8+GZMB+GZMH+
ESCO1	1.3625e-62	0.384357	0.26	0.087	1.82153e-58	GBM.pembro.PBMC	ESCO1	0.173	P1_CD8+GZMB+GZMH+
AKAP13	4.66221e-83	0.384084	0.67	0.403	6.2329e-79	GBM.pembro.PBMC	AKAP13	0.267	P1_CD8+GZMB+GZMH+
NCL	1.51642e-81	0.383988	0.774	0.544	2.0273e-77	GBM.pembro.PBMC	NCL	0.23	P1_CD8+GZMB+GZMH+
ZNF644	6.67344e-61	0.381792	0.251	0.084	8.92172e-57	GBM.pembro.PBMC	ZNF644	0.167	P1_CD8+GZMB+GZMH+
TNRC6B	1.44161e-74	0.380385	0.527	0.266	1.92729e-70	GBM.pembro.PBMC	TNRC6B	0.261	P1_CD8+GZMB+GZMH+
PPP4R3A	1.20598e-77	0.380247	0.351	0.132	1.61227e-73	GBM.pembro.PBMC	PPP4R3A	0.219	P1_CD8+GZMB+GZMH+
GBP4	1.43549e-58	0.379411	0.269	0.1	1.91911e-54	GBM.pembro.PBMC	GBP4	0.169	P1_CD8+GZMB+GZMH+
RBM5	1.83018e-62	0.379188	0.287	0.107	2.44677e-58	GBM.pembro.PBMC	RBM5	0.18	P1_CD8+GZMB+GZMH+
SEMA4D	1.93213e-66	0.378232	0.391	0.176	2.58307e-62	GBM.pembro.PBMC	SEMA4D	0.215	P1_CD8+GZMB+GZMH+
RUNX3	2.24889e-66	0.375911	0.601	0.363	3.00654e-62	GBM.pembro.PBMC	RUNX3	0.238	P1_CD8+GZMB+GZMH+
STIM2	5.09315e-63	0.37578	0.285	0.103	6.80904e-59	GBM.pembro.PBMC	STIM2	0.182	P1_CD8+GZMB+GZMH+
RBM39	4.20189e-84	0.375756	0.797	0.573	5.6175e-80	GBM.pembro.PBMC	RBM39	0.224	P1_CD8+GZMB+GZMH+
MXD4	3.91463e-77	0.375622	0.322	0.111	5.23347e-73	GBM.pembro.PBMC	MXD4	0.211	P1_CD8+GZMB+GZMH+
CHD3	5.50001e-63	0.375588	0.341	0.144	7.35296e-59	GBM.pembro.PBMC	CHD3	0.197	P1_CD8+GZMB+GZMH+
PAK2	2.28917e-73	0.375573	0.519	0.267	3.0604e-69	GBM.pembro.PBMC	PAK2	0.252	P1_CD8+GZMB+GZMH+
ZBTB1	2.42781e-60	0.375475	0.337	0.145	3.24574e-56	GBM.pembro.PBMC	ZBTB1	0.192	P1_CD8+GZMB+GZMH+
THAP12	2.50428e-73	0.374946	0.274	0.085	3.34798e-69	GBM.pembro.PBMC	THAP12	0.189	P1_CD8+GZMB+GZMH+
WDR82	5.10402e-64	0.374673	0.35	0.151	6.82356e-60	GBM.pembro.PBMC	WDR82	0.199	P1_CD8+GZMB+GZMH+
PAFAH1B1	2.00933e-70	0.374366	0.431	0.202	2.68628e-66	GBM.pembro.PBMC	PAFAH1B1	0.229	P1_CD8+GZMB+GZMH+
DIAPH1	1.91037e-67	0.373899	0.536	0.29	2.55398e-63	GBM.pembro.PBMC	DIAPH1	0.246	P1_CD8+GZMB+GZMH+
CWF19L2	6.66349e-67	0.373795	0.325	0.123	8.90842e-63	GBM.pembro.PBMC	CWF19L2	0.202	P1_CD8+GZMB+GZMH+
CYLD	2.8996e-67	0.373665	0.422	0.2	3.87648e-63	GBM.pembro.PBMC	CYLD	0.222	P1_CD8+GZMB+GZMH+
IFI16	6.58477e-58	0.372227	0.565	0.342	8.80318e-54	GBM.pembro.PBMC	IFI16	0.223	P1_CD8+GZMB+GZMH+
CREBRF	1.01624e-59	0.371609	0.337	0.146	1.35862e-55	GBM.pembro.PBMC	CREBRF	0.191	P1_CD8+GZMB+GZMH+
ACIN1	4.71562e-59	0.371396	0.32	0.133	6.30432e-55	GBM.pembro.PBMC	ACIN1	0.187	P1_CD8+GZMB+GZMH+
CAST	1.55821e-67	0.371217	0.662	0.424	2.08318e-63	GBM.pembro.PBMC	CAST	0.238	P1_CD8+GZMB+GZMH+
UBTF	3.65777e-59	0.370038	0.353	0.157	4.89008e-55	GBM.pembro.PBMC	UBTF	0.196	P1_CD8+GZMB+GZMH+
ZEB2	5.49701e-74	0.368726	0.681	0.442	7.34896e-70	GBM.pembro.PBMC	ZEB2	0.239	P1_CD8+GZMB+GZMH+
CNOT6L	1.18402e-72	0.368226	0.412	0.184	1.58291e-68	GBM.pembro.PBMC	CNOT6L	0.228	P1_CD8+GZMB+GZMH+
DNAJB14	2.11499e-65	0.367933	0.384	0.172	2.82752e-61	GBM.pembro.PBMC	DNAJB14	0.212	P1_CD8+GZMB+GZMH+
KIAA1109	4.86797e-57	0.366996	0.295	0.119	6.50799e-53	GBM.pembro.PBMC	KIAA1109	0.176	P1_CD8+GZMB+GZMH+
RFC1	4.77781e-62	0.365953	0.358	0.16	6.38745e-58	GBM.pembro.PBMC	RFC1	0.198	P1_CD8+GZMB+GZMH+
LUC7L3	9.62182e-74	0.363899	0.599	0.34	1.28634e-69	GBM.pembro.PBMC	LUC7L3	0.259	P1_CD8+GZMB+GZMH+
RECQL	1.75549e-52	0.363237	0.356	0.17	2.34691e-48	GBM.pembro.PBMC	RECQL	0.186	P1_CD8+GZMB+GZMH+
KPNA4	1.09533e-58	0.362894	0.264	0.096	1.46435e-54	GBM.pembro.PBMC	KPNA4	0.168	P1_CD8+GZMB+GZMH+
TRIM33	5.10003e-62	0.360706	0.267	0.093	6.81823e-58	GBM.pembro.PBMC	TRIM33	0.174	P1_CD8+GZMB+GZMH+
RBM26	3.03019e-59	0.360686	0.259	0.091	4.05106e-55	GBM.pembro.PBMC	RBM26	0.168	P1_CD8+GZMB+GZMH+
ANKRD44	1.51591e-63	0.36057	0.534	0.295	2.02662e-59	GBM.pembro.PBMC	ANKRD44	0.239	P1_CD8+GZMB+GZMH+
ZNF638	6.04319e-60	0.36021	0.318	0.133	8.07914e-56	GBM.pembro.PBMC	ZNF638	0.185	P1_CD8+GZMB+GZMH+
STK4	4.16528e-70	0.360118	0.714	0.475	5.56857e-66	GBM.pembro.PBMC	STK4	0.239	P1_CD8+GZMB+GZMH+
MIER1	6.25997e-61	0.360036	0.378	0.175	8.36895e-57	GBM.pembro.PBMC	MIER1	0.203	P1_CD8+GZMB+GZMH+
TTC3	5.41509e-56	0.359755	0.405	0.203	7.23944e-52	GBM.pembro.PBMC	TTC3	0.202	P1_CD8+GZMB+GZMH+
RB1CC1	4.3976e-50	0.358575	0.288	0.125	5.87915e-46	GBM.pembro.PBMC	RB1CC1	0.163	P1_CD8+GZMB+GZMH+
DYNC1H1	7.07865e-65	0.357733	0.429	0.206	9.46344e-61	GBM.pembro.PBMC	DYNC1H1	0.223	P1_CD8+GZMB+GZMH+
USP16	6.61449e-53	0.357416	0.392	0.197	8.84291e-49	GBM.pembro.PBMC	USP16	0.195	P1_CD8+GZMB+GZMH+
GIMAP4	7.35518e-57	0.357001	0.673	0.468	9.83314e-53	GBM.pembro.PBMC	GIMAP4	0.205	P1_CD8+GZMB+GZMH+
CAB39	9.48769e-62	0.356485	0.272	0.095	1.26841e-57	GBM.pembro.PBMC	CAB39	0.177	P1_CD8+GZMB+GZMH+
MDFIC	6.53339e-51	0.356188	0.27	0.111	8.73449e-47	GBM.pembro.PBMC	MDFIC	0.159	P1_CD8+GZMB+GZMH+
CHD1	3.7783e-54	0.355447	0.336	0.153	5.0512e-50	GBM.pembro.PBMC	CHD1	0.183	P1_CD8+GZMB+GZMH+
ARID4B	1.30119e-56	0.354975	0.555	0.329	1.73956e-52	GBM.pembro.PBMC	ARID4B	0.226	P1_CD8+GZMB+GZMH+
PTP4A2	7.77689e-81	0.35488	0.7	0.449	1.03969e-76	GBM.pembro.PBMC	PTP4A2	0.251	P1_CD8+GZMB+GZMH+
FRYL	2.2304e-62	0.353816	0.331	0.139	2.98182e-58	GBM.pembro.PBMC	FRYL	0.192	P1_CD8+GZMB+GZMH+
DDX46	1.6742e-61	0.353755	0.574	0.343	2.23823e-57	GBM.pembro.PBMC	DDX46	0.231	P1_CD8+GZMB+GZMH+
AGTPBP1	3.35577e-56	0.353291	0.288	0.115	4.48632e-52	GBM.pembro.PBMC	AGTPBP1	0.173	P1_CD8+GZMB+GZMH+
LYST	9.25012e-49	0.35314	0.333	0.162	1.23665e-44	GBM.pembro.PBMC	LYST	0.171	P1_CD8+GZMB+GZMH+
ABHD17A	1.4282e-85	0.352938	0.669	0.381	1.90936e-81	GBM.pembro.PBMC	ABHD17A	0.288	P1_CD8+GZMB+GZMH+
CENPC	7.70335e-61	0.352304	0.314	0.127	1.02986e-56	GBM.pembro.PBMC	CENPC	0.187	P1_CD8+GZMB+GZMH+
BIRC6	3.93879e-54	0.351959	0.382	0.187	5.26577e-50	GBM.pembro.PBMC	BIRC6	0.195	P1_CD8+GZMB+GZMH+
CCDC88C	1.52174e-56	0.351684	0.454	0.24	2.03442e-52	GBM.pembro.PBMC	CCDC88C	0.214	P1_CD8+GZMB+GZMH+
SPTAN1	1.22314e-48	0.351657	0.418	0.226	1.63522e-44	GBM.pembro.PBMC	SPTAN1	0.192	P1_CD8+GZMB+GZMH+
VPS4B	1.75506e-56	0.351383	0.415	0.209	2.34634e-52	GBM.pembro.PBMC	VPS4B	0.206	P1_CD8+GZMB+GZMH+
TXNIP	6.82135e-98	0.351214	0.962	0.875	9.11946e-94	GBM.pembro.PBMC	TXNIP	0.087	P1_CD8+GZMB+GZMH+
SRRM1	1.82283e-65	0.351202	0.665	0.426	2.43694e-61	GBM.pembro.PBMC	SRRM1	0.239	P1_CD8+GZMB+GZMH+
SLFN12L	7.99456e-57	0.350977	0.307	0.128	1.06879e-52	GBM.pembro.PBMC	SLFN12L	0.179	P1_CD8+GZMB+GZMH+
CCSER2	1.08534e-53	0.350557	0.392	0.197	1.45099e-49	GBM.pembro.PBMC	CCSER2	0.195	P1_CD8+GZMB+GZMH+
SMAP2	1.54025e-84	0.350518	0.471	0.211	2.05917e-80	GBM.pembro.PBMC	SMAP2	0.26	P1_CD8+GZMB+GZMH+
PTBP3	2.47855e-58	0.349228	0.39	0.189	3.31357e-54	GBM.pembro.PBMC	PTBP3	0.201	P1_CD8+GZMB+GZMH+
ACTR2	4.06016e-66	0.348953	0.66	0.417	5.42802e-62	GBM.pembro.PBMC	ACTR2	0.243	P1_CD8+GZMB+GZMH+
RBM33	1.46012e-65	0.348747	0.317	0.123	1.95204e-61	GBM.pembro.PBMC	RBM33	0.194	P1_CD8+GZMB+GZMH+
FNBP4	1.34031e-54	0.34857	0.413	0.213	1.79186e-50	GBM.pembro.PBMC	FNBP4	0.2	P1_CD8+GZMB+GZMH+
DDX6	4.29102e-57	0.347751	0.56	0.333	5.73666e-53	GBM.pembro.PBMC	DDX6	0.227	P1_CD8+GZMB+GZMH+
KMT2C	6.03437e-53	0.345933	0.331	0.15	8.06736e-49	GBM.pembro.PBMC	KMT2C	0.181	P1_CD8+GZMB+GZMH+
SET	6.50437e-80	0.345922	0.708	0.455	8.69569e-76	GBM.pembro.PBMC	SET	0.253	P1_CD8+GZMB+GZMH+
CNTRL	1.88601e-51	0.345359	0.301	0.131	2.52141e-47	GBM.pembro.PBMC	CNTRL	0.17	P1_CD8+GZMB+GZMH+
REST	1.37244e-55	0.344885	0.372	0.177	1.83481e-51	GBM.pembro.PBMC	REST	0.195	P1_CD8+GZMB+GZMH+
GSPT1	1.5176e-57	0.343947	0.308	0.125	2.02888e-53	GBM.pembro.PBMC	GSPT1	0.183	P1_CD8+GZMB+GZMH+
DOCK10	1.62101e-55	0.343235	0.354	0.163	2.16712e-51	GBM.pembro.PBMC	DOCK10	0.191	P1_CD8+GZMB+GZMH+
SLC38A1	2.73005e-49	0.342405	0.472	0.272	3.6498e-45	GBM.pembro.PBMC	SLC38A1	0.2	P1_CD8+GZMB+GZMH+
KIDINS220	5.01389e-56	0.34232	0.268	0.102	6.70307e-52	GBM.pembro.PBMC	KIDINS220	0.166	P1_CD8+GZMB+GZMH+
IGF2R	3.88332e-58	0.34137	0.34	0.148	5.19161e-54	GBM.pembro.PBMC	IGF2R	0.192	P1_CD8+GZMB+GZMH+
PPP1R10	2.74356e-61	0.341229	0.292	0.109	3.66787e-57	GBM.pembro.PBMC	PPP1R10	0.183	P1_CD8+GZMB+GZMH+
DOCK8	8.74263e-63	0.341164	0.45	0.228	1.1688e-58	GBM.pembro.PBMC	DOCK8	0.222	P1_CD8+GZMB+GZMH+
XPO1	1.8672e-50	0.340391	0.301	0.131	2.49626e-46	GBM.pembro.PBMC	XPO1	0.17	P1_CD8+GZMB+GZMH+
SMG1	1.34184e-50	0.339898	0.379	0.191	1.79391e-46	GBM.pembro.PBMC	SMG1	0.188	P1_CD8+GZMB+GZMH+
SLC4A7	1.97479e-52	0.338108	0.284	0.118	2.6401e-48	GBM.pembro.PBMC	SLC4A7	0.166	P1_CD8+GZMB+GZMH+
MORC3	6.09329e-52	0.337959	0.253	0.096	8.14612e-48	GBM.pembro.PBMC	MORC3	0.157	P1_CD8+GZMB+GZMH+
LARS	6.21549e-51	0.337565	0.274	0.112	8.30949e-47	GBM.pembro.PBMC	LARS	0.162	P1_CD8+GZMB+GZMH+
KTN1	8.45141e-60	0.336257	0.489	0.266	1.12987e-55	GBM.pembro.PBMC	KTN1	0.223	P1_CD8+GZMB+GZMH+
NFATC2IP	8.86869e-55	0.334876	0.285	0.114	1.18565e-50	GBM.pembro.PBMC	NFATC2IP	0.171	P1_CD8+GZMB+GZMH+
USP7	1.47989e-64	0.334265	0.276	0.097	1.97846e-60	GBM.pembro.PBMC	USP7	0.179	P1_CD8+GZMB+GZMH+
CD46	8.94043e-56	0.33371	0.388	0.187	1.19525e-51	GBM.pembro.PBMC	CD46	0.201	P1_CD8+GZMB+GZMH+
BCL9L	1.5793e-50	0.333095	0.251	0.098	2.11137e-46	GBM.pembro.PBMC	BCL9L	0.153	P1_CD8+GZMB+GZMH+
NRDC	1.66571e-51	0.333062	0.358	0.175	2.22689e-47	GBM.pembro.PBMC	NRDC	0.183	P1_CD8+GZMB+GZMH+
SFPQ	4.17733e-70	0.332134	0.514	0.265	5.58467e-66	GBM.pembro.PBMC	SFPQ	0.249	P1_CD8+GZMB+GZMH+
DDX21	6.89697e-55	0.332038	0.382	0.186	9.22057e-51	GBM.pembro.PBMC	DDX21	0.196	P1_CD8+GZMB+GZMH+
DEK	9.34986e-60	0.329756	0.609	0.379	1.24998e-55	GBM.pembro.PBMC	DEK	0.23	P1_CD8+GZMB+GZMH+
GNAI2	3.38095e-78	0.32795	0.659	0.386	4.51999e-74	GBM.pembro.PBMC	GNAI2	0.273	P1_CD8+GZMB+GZMH+
CTCF	1.16237e-52	0.327415	0.288	0.118	1.55398e-48	GBM.pembro.PBMC	CTCF	0.17	P1_CD8+GZMB+GZMH+
SPCS3	1.15618e-52	0.327231	0.457	0.251	1.5457e-48	GBM.pembro.PBMC	SPCS3	0.206	P1_CD8+GZMB+GZMH+
HUWE1	1.15844e-49	0.326376	0.291	0.126	1.54872e-45	GBM.pembro.PBMC	HUWE1	0.165	P1_CD8+GZMB+GZMH+
LBR	1.49293e-59	0.324609	0.453	0.23	1.9959e-55	GBM.pembro.PBMC	LBR	0.223	P1_CD8+GZMB+GZMH+
LCP1	8.68709e-72	0.323665	0.849	0.678	1.16138e-67	GBM.pembro.PBMC	LCP1	0.171	P1_CD8+GZMB+GZMH+
CHD6	5.03814e-46	0.323455	0.251	0.103	6.73548e-42	GBM.pembro.PBMC	CHD6	0.148	P1_CD8+GZMB+GZMH+
SETD2	5.7994e-43	0.322953	0.302	0.147	7.75322e-39	GBM.pembro.PBMC	SETD2	0.155	P1_CD8+GZMB+GZMH+
CLIP1	8.51111e-51	0.322577	0.284	0.121	1.13785e-46	GBM.pembro.PBMC	CLIP1	0.163	P1_CD8+GZMB+GZMH+
NSD1	5.83981e-47	0.322473	0.327	0.154	7.80725e-43	GBM.pembro.PBMC	NSD1	0.173	P1_CD8+GZMB+GZMH+
TUT7	1.56291e-55	0.32244	0.267	0.1	2.08946e-51	GBM.pembro.PBMC	TUT7	0.167	P1_CD8+GZMB+GZMH+
FAM133B	1.25555e-47	0.322207	0.403	0.217	1.67854e-43	GBM.pembro.PBMC	FAM133B	0.186	P1_CD8+GZMB+GZMH+
IFITM1	0	2.12982	0.773	0.292	0	GBM.rec.PBMC	IFITM1	0.481	P1_CD8+GZMB+GZMH+
S100A9	2.7802e-104	1.62191	0.529	0.246	3.71684e-100	GBM.rec.PBMC	S100A9	0.283	P1_CD8+GZMB+GZMH+
IFITM3	0	1.41177	0.468	0.044	0	GBM.rec.PBMC	IFITM3	0.424	P1_CD8+GZMB+GZMH+
GABARAP	0	1.31396	0.58	0.11	0	GBM.rec.PBMC	GABARAP	0.47	P1_CD8+GZMB+GZMH+
S100A8	4.13251e-100	1.27344	0.443	0.178	5.52475e-96	GBM.rec.PBMC	S100A8	0.265	P1_CD8+GZMB+GZMH+
LYZ	4.24821e-25	1.17004	0.377	0.254	5.67943e-21	GBM.rec.PBMC	LYZ	0.123	P1_CD8+GZMB+GZMH+
PTPRCAP	0	1.15297	0.373	0.002	0	GBM.rec.PBMC	PTPRCAP	0.371	P1_CD8+GZMB+GZMH+
ALDOA	6.65847e-276	1.105	0.471	0.076	8.90171e-272	GBM.rec.PBMC	ALDOA	0.395	P1_CD8+GZMB+GZMH+
LIME1	0	1.03839	0.325	0.002	0	GBM.rec.PBMC	LIME1	0.323	P1_CD8+GZMB+GZMH+
ZFP36	6.86223e-127	1.00152	0.68	0.443	9.17411e-123	GBM.rec.PBMC	ZFP36	0.237	P1_CD8+GZMB+GZMH+
PCBP2	2.0195e-175	0.899925	0.791	0.561	2.69987e-171	GBM.rec.PBMC	PCBP2	0.23	P1_CD8+GZMB+GZMH+
MIF	6.44825e-167	0.880112	0.665	0.317	8.62067e-163	GBM.rec.PBMC	MIF	0.348	P1_CD8+GZMB+GZMH+
PCBP1	7.6523e-175	0.879993	0.772	0.517	1.02304e-170	GBM.rec.PBMC	PCBP1	0.255	P1_CD8+GZMB+GZMH+
TYROBP	1.86101e-58	0.843345	0.387	0.199	2.48798e-54	GBM.rec.PBMC	TYROBP	0.188	P1_CD8+GZMB+GZMH+
CD74	1.75665e-97	0.812806	0.759	0.587	2.34846e-93	GBM.rec.PBMC	CD74	0.172	P1_CD8+GZMB+GZMH+
PSMB10	2.52865e-123	0.794771	0.544	0.245	3.38055e-119	GBM.rec.PBMC	PSMB10	0.299	P1_CD8+GZMB+GZMH+
ZYX	6.33036e-129	0.787966	0.48	0.182	8.46306e-125	GBM.rec.PBMC	ZYX	0.298	P1_CD8+GZMB+GZMH+
NME2	6.04925e-221	0.778321	0.268	0.014	8.08724e-217	GBM.rec.PBMC	NME2	0.254	P1_CD8+GZMB+GZMH+
ZFP36L2	5.86994e-169	0.69251	0.925	0.797	7.84752e-165	GBM.rec.PBMC	ZFP36L2	0.128	P1_CD8+GZMB+GZMH+
PPDPF	1.2999e-129	0.690899	0.845	0.708	1.73783e-125	GBM.rec.PBMC	PPDPF	0.137	P1_CD8+GZMB+GZMH+
ARF5	8.88109e-109	0.661865	0.501	0.217	1.18731e-104	GBM.rec.PBMC	ARF5	0.284	P1_CD8+GZMB+GZMH+
CD7	2.07223e-61	0.648677	0.656	0.515	2.77036e-57	GBM.rec.PBMC	CD7	0.141	P1_CD8+GZMB+GZMH+
DAZAP2	3.13205e-106	0.640994	0.735	0.504	4.18724e-102	GBM.rec.PBMC	DAZAP2	0.231	P1_CD8+GZMB+GZMH+
SELPLG	3.74385e-76	0.625648	0.574	0.35	5.00516e-72	GBM.rec.PBMC	SELPLG	0.224	P1_CD8+GZMB+GZMH+
GPI	6.35691e-96	0.599305	0.393	0.149	8.49855e-92	GBM.rec.PBMC	GPI	0.244	P1_CD8+GZMB+GZMH+
ACTB	2.8069e-125	0.596007	0.971	0.995	3.75254e-121	GBM.rec.PBMC	ACTB	-0.024	P1_CD8+GZMB+GZMH+
CNN2	4.40503e-59	0.590921	0.516	0.323	5.88909e-55	GBM.rec.PBMC	CNN2	0.193	P1_CD8+GZMB+GZMH+
VIM	2.81824e-81	0.590621	0.86	0.765	3.76771e-77	GBM.rec.PBMC	VIM	0.095	P1_CD8+GZMB+GZMH+
FKBP5	3.3831e-39	0.575749	0.373	0.218	4.52287e-35	GBM.rec.PBMC	FKBP5	0.155	P1_CD8+GZMB+GZMH+
SLC44A2	1.14344e-68	0.571654	0.365	0.158	1.52867e-64	GBM.rec.PBMC	SLC44A2	0.207	P1_CD8+GZMB+GZMH+
RAB1B	5.16565e-79	0.571445	0.395	0.175	6.90595e-75	GBM.rec.PBMC	RAB1B	0.22	P1_CD8+GZMB+GZMH+
FXYD5	6.61389e-75	0.565962	0.726	0.536	8.84211e-71	GBM.rec.PBMC	FXYD5	0.19	P1_CD8+GZMB+GZMH+
FCMR	6.5208e-69	0.563028	0.404	0.193	8.71766e-65	GBM.rec.PBMC	FCMR	0.211	P1_CD8+GZMB+GZMH+
NCR3	1.18554e-60	0.56091	0.284	0.11	1.58495e-56	GBM.rec.PBMC	NCR3	0.174	P1_CD8+GZMB+GZMH+
RHOA	1.71851e-86	0.555904	0.784	0.655	2.29748e-82	GBM.rec.PBMC	RHOA	0.129	P1_CD8+GZMB+GZMH+
TSC22D3	1.55663e-67	0.554565	0.818	0.726	2.08106e-63	GBM.rec.PBMC	TSC22D3	0.092	P1_CD8+GZMB+GZMH+
CD3E	3.11412e-115	0.553109	0.855	0.843	4.16327e-111	GBM.rec.PBMC	CD3E	0.012	P1_CD8+GZMB+GZMH+
PSMA6	1.64702e-90	0.547665	0.317	0.102	2.2019e-86	GBM.rec.PBMC	PSMA6	0.215	P1_CD8+GZMB+GZMH+
IFITM2	1.17636e-84	0.547319	0.823	0.713	1.57267e-80	GBM.rec.PBMC	IFITM2	0.11	P1_CD8+GZMB+GZMH+
FLOT2	3.39733e-72	0.546169	0.335	0.134	4.54189e-68	GBM.rec.PBMC	FLOT2	0.201	P1_CD8+GZMB+GZMH+
HLA-B	4.12955e-189	0.526699	0.98	1	5.5208e-185	GBM.rec.PBMC	HLA-B	-0.02	P1_CD8+GZMB+GZMH+
SHISA5	1.55782e-62	0.516191	0.495	0.279	2.08265e-58	GBM.rec.PBMC	SHISA5	0.216	P1_CD8+GZMB+GZMH+
SASH3	4.14003e-47	0.512968	0.461	0.279	5.53481e-43	GBM.rec.PBMC	SASH3	0.182	P1_CD8+GZMB+GZMH+
DDIT4	3.26396e-37	0.512905	0.575	0.432	4.36359e-33	GBM.rec.PBMC	DDIT4	0.143	P1_CD8+GZMB+GZMH+
RPN1	5.21404e-63	0.512669	0.343	0.151	6.97065e-59	GBM.rec.PBMC	RPN1	0.192	P1_CD8+GZMB+GZMH+
DUSP2	3.84204e-28	0.508446	0.588	0.466	5.13642e-24	GBM.rec.PBMC	DUSP2	0.122	P1_CD8+GZMB+GZMH+
CD8A	1.17537e-39	0.504807	0.704	0.684	1.57135e-35	GBM.rec.PBMC	CD8A	0.02	P1_CD8+GZMB+GZMH+
RAC2	7.50139e-75	0.5047	0.816	0.768	1.00286e-70	GBM.rec.PBMC	RAC2	0.048	P1_CD8+GZMB+GZMH+
ADGRG1	1.64847e-52	0.501231	0.577	0.389	2.20384e-48	GBM.rec.PBMC	ADGRG1	0.188	P1_CD8+GZMB+GZMH+
FLT3LG	2.24111e-56	0.494684	0.285	0.116	2.99614e-52	GBM.rec.PBMC	FLT3LG	0.169	P1_CD8+GZMB+GZMH+
ZAP70	2.9443e-55	0.493523	0.581	0.381	3.93624e-51	GBM.rec.PBMC	ZAP70	0.2	P1_CD8+GZMB+GZMH+
IL7R	1.28103e-07	0.492378	0.342	0.295	0.0017126	GBM.rec.PBMC	IL7R	0.047	P1_CD8+GZMB+GZMH+
SLC9A3R1	1.327e-60	0.491144	0.684	0.513	1.77407e-56	GBM.rec.PBMC	SLC9A3R1	0.171	P1_CD8+GZMB+GZMH+
TBRG1	1.23744e-51	0.491085	0.327	0.157	1.65433e-47	GBM.rec.PBMC	TBRG1	0.17	P1_CD8+GZMB+GZMH+
EEF2	2.68534e-86	0.487969	0.868	0.821	3.59003e-82	GBM.rec.PBMC	EEF2	0.047	P1_CD8+GZMB+GZMH+
WASHC1	3.45655e-59	0.487048	0.288	0.115	4.62106e-55	GBM.rec.PBMC	WASHC1	0.173	P1_CD8+GZMB+GZMH+
SH2D2A	1.59305e-47	0.485068	0.36	0.187	2.12975e-43	GBM.rec.PBMC	SH2D2A	0.173	P1_CD8+GZMB+GZMH+
PXN	3.61783e-46	0.482777	0.407	0.232	4.83668e-42	GBM.rec.PBMC	PXN	0.175	P1_CD8+GZMB+GZMH+
MYH9	8.07041e-51	0.481936	0.707	0.547	1.07893e-46	GBM.rec.PBMC	MYH9	0.16	P1_CD8+GZMB+GZMH+
CTSW	3.79187e-73	0.47745	0.843	0.832	5.06935e-69	GBM.rec.PBMC	CTSW	0.011	P1_CD8+GZMB+GZMH+
FCGR3A	5.49919e-43	0.475153	0.549	0.376	7.35187e-39	GBM.rec.PBMC	FCGR3A	0.173	P1_CD8+GZMB+GZMH+
DUSP1	3.5807e-32	0.475148	0.515	0.358	4.78704e-28	GBM.rec.PBMC	DUSP1	0.157	P1_CD8+GZMB+GZMH+
GLUL	6.20703e-25	0.46811	0.291	0.173	8.29817e-21	GBM.rec.PBMC	GLUL	0.118	P1_CD8+GZMB+GZMH+
CCND3	1.38444e-63	0.465949	0.721	0.553	1.85085e-59	GBM.rec.PBMC	CCND3	0.168	P1_CD8+GZMB+GZMH+
EMD	2.31201e-56	0.463994	0.361	0.173	3.09092e-52	GBM.rec.PBMC	EMD	0.188	P1_CD8+GZMB+GZMH+
EEF1A1	4.63111e-209	0.459954	0.996	0.998	6.19133e-205	GBM.rec.PBMC	EEF1A1	-0.002	P1_CD8+GZMB+GZMH+
LSP1	5.31229e-59	0.459741	0.785	0.74	7.10201e-55	GBM.rec.PBMC	LSP1	0.045	P1_CD8+GZMB+GZMH+
TCIRG1	1.26744e-42	0.458836	0.28	0.131	1.69444e-38	GBM.rec.PBMC	TCIRG1	0.149	P1_CD8+GZMB+GZMH+
ADGRE5	2.7372e-43	0.458152	0.574	0.402	3.65936e-39	GBM.rec.PBMC	ADGRE5	0.172	P1_CD8+GZMB+GZMH+
FLNA	2.29826e-50	0.455412	0.798	0.683	3.07255e-46	GBM.rec.PBMC	FLNA	0.115	P1_CD8+GZMB+GZMH+
ITGB2	1.44493e-72	0.443793	0.854	0.834	1.93173e-68	GBM.rec.PBMC	ITGB2	0.02	P1_CD8+GZMB+GZMH+
PNPLA2	8.8904e-57	0.443266	0.277	0.108	1.18856e-52	GBM.rec.PBMC	PNPLA2	0.169	P1_CD8+GZMB+GZMH+
FGR	2.19689e-34	0.443174	0.392	0.234	2.93702e-30	GBM.rec.PBMC	FGR	0.158	P1_CD8+GZMB+GZMH+
P4HB	3.3615e-41	0.44033	0.581	0.405	4.49399e-37	GBM.rec.PBMC	P4HB	0.176	P1_CD8+GZMB+GZMH+
UCP2	6.80878e-47	0.439287	0.723	0.583	9.10266e-43	GBM.rec.PBMC	UCP2	0.14	P1_CD8+GZMB+GZMH+
SF3A2	1.62954e-55	0.439032	0.337	0.15	2.17853e-51	GBM.rec.PBMC	SF3A2	0.187	P1_CD8+GZMB+GZMH+
LAPTM5	1.75803e-56	0.438821	0.784	0.698	2.35032e-52	GBM.rec.PBMC	LAPTM5	0.086	P1_CD8+GZMB+GZMH+
GAPDH	1.41924e-77	0.435846	0.896	0.9	1.89739e-73	GBM.rec.PBMC	GAPDH	-0.004	P1_CD8+GZMB+GZMH+
HCLS1	4.46528e-48	0.435061	0.681	0.526	5.96964e-44	GBM.rec.PBMC	HCLS1	0.155	P1_CD8+GZMB+GZMH+
KRTCAP2	1.95834e-52	0.431589	0.545	0.336	2.6181e-48	GBM.rec.PBMC	KRTCAP2	0.209	P1_CD8+GZMB+GZMH+
FLI1	2.88467e-48	0.430956	0.356	0.181	3.85651e-44	GBM.rec.PBMC	FLI1	0.175	P1_CD8+GZMB+GZMH+
WDR1	2.3448e-45	0.429071	0.578	0.39	3.13477e-41	GBM.rec.PBMC	WDR1	0.188	P1_CD8+GZMB+GZMH+
CCNI	1.86123e-44	0.428332	0.769	0.651	2.48827e-40	GBM.rec.PBMC	CCNI	0.118	P1_CD8+GZMB+GZMH+
PPIB	1.8988e-53	0.427502	0.774	0.672	2.5385e-49	GBM.rec.PBMC	PPIB	0.102	P1_CD8+GZMB+GZMH+
CD37	7.33651e-50	0.420216	0.773	0.686	9.80817e-46	GBM.rec.PBMC	CD37	0.087	P1_CD8+GZMB+GZMH+
PPP2R1A	1.41596e-50	0.419268	0.364	0.177	1.893e-46	GBM.rec.PBMC	PPP2R1A	0.187	P1_CD8+GZMB+GZMH+
ARL5A	2.23142e-49	0.417405	0.273	0.115	2.98318e-45	GBM.rec.PBMC	ARL5A	0.158	P1_CD8+GZMB+GZMH+
TNFRSF1B	3.2621e-36	0.41347	0.468	0.303	4.3611e-32	GBM.rec.PBMC	TNFRSF1B	0.165	P1_CD8+GZMB+GZMH+
PPIA	4.9249e-73	0.41081	0.861	0.869	6.5841e-69	GBM.rec.PBMC	PPIA	-0.008	P1_CD8+GZMB+GZMH+
TMC8	2.3188e-37	0.406556	0.401	0.236	3.10001e-33	GBM.rec.PBMC	TMC8	0.165	P1_CD8+GZMB+GZMH+
PKM	1.85447e-39	0.405901	0.518	0.336	2.47924e-35	GBM.rec.PBMC	PKM	0.182	P1_CD8+GZMB+GZMH+
TOMM5	2.2985e-50	0.400867	0.288	0.123	3.07286e-46	GBM.rec.PBMC	TOMM5	0.165	P1_CD8+GZMB+GZMH+
AUP1	4.65137e-36	0.399149	0.369	0.208	6.21842e-32	GBM.rec.PBMC	AUP1	0.161	P1_CD8+GZMB+GZMH+
NDUFV1	4.97918e-37	0.396895	0.363	0.203	6.65666e-33	GBM.rec.PBMC	NDUFV1	0.16	P1_CD8+GZMB+GZMH+
PFN1	8.79295e-67	0.396587	0.906	0.97	1.17553e-62	GBM.rec.PBMC	PFN1	-0.064	P1_CD8+GZMB+GZMH+
LAMP1	4.34983e-32	0.394703	0.435	0.281	5.81529e-28	GBM.rec.PBMC	LAMP1	0.154	P1_CD8+GZMB+GZMH+
ANXA11	1.02723e-29	0.393857	0.51	0.36	1.37331e-25	GBM.rec.PBMC	ANXA11	0.15	P1_CD8+GZMB+GZMH+
PTGDR	9.27362e-38	0.393127	0.367	0.203	1.23979e-33	GBM.rec.PBMC	PTGDR	0.164	P1_CD8+GZMB+GZMH+
LIMD2	9.39266e-30	0.392536	0.735	0.649	1.2557e-25	GBM.rec.PBMC	LIMD2	0.086	P1_CD8+GZMB+GZMH+
ACTG1	3.91934e-52	0.392391	0.909	0.942	5.23977e-48	GBM.rec.PBMC	ACTG1	-0.033	P1_CD8+GZMB+GZMH+
PHB2	1.82062e-33	0.392323	0.428	0.272	2.43399e-29	GBM.rec.PBMC	PHB2	0.156	P1_CD8+GZMB+GZMH+
SF3A1	2.28301e-34	0.391129	0.283	0.15	3.05215e-30	GBM.rec.PBMC	SF3A1	0.133	P1_CD8+GZMB+GZMH+
SYNGR2	7.35157e-51	0.39004	0.27	0.109	9.82831e-47	GBM.rec.PBMC	SYNGR2	0.161	P1_CD8+GZMB+GZMH+
APH1A	1.52568e-39	0.389011	0.405	0.229	2.03969e-35	GBM.rec.PBMC	APH1A	0.176	P1_CD8+GZMB+GZMH+
C12orf57	6.20889e-27	0.388555	0.682	0.575	8.30066e-23	GBM.rec.PBMC	C12orf57	0.107	P1_CD8+GZMB+GZMH+
TAGLN2	7.48396e-31	0.388533	0.638	0.519	1.00053e-26	GBM.rec.PBMC	TAGLN2	0.119	P1_CD8+GZMB+GZMH+
2021-09-09	5.80515e-36	0.387205	0.617	0.467	7.76091e-32	GBM.rec.PBMC	2021-09-09	0.15	P1_CD8+GZMB+GZMH+
PRF1	3.81882e-45	0.386567	0.799	0.77	5.10538e-41	GBM.rec.PBMC	PRF1	0.029	P1_CD8+GZMB+GZMH+
DDOST	7.43186e-37	0.386433	0.425	0.261	9.93565e-33	GBM.rec.PBMC	DDOST	0.164	P1_CD8+GZMB+GZMH+
HERPUD1	3.40765e-17	0.385668	0.469	0.368	4.55568e-13	GBM.rec.PBMC	HERPUD1	0.101	P1_CD8+GZMB+GZMH+
ARHGAP4	7.5038e-30	0.385509	0.367	0.228	1.00318e-25	GBM.rec.PBMC	ARHGAP4	0.139	P1_CD8+GZMB+GZMH+
DENND1C	1.58604e-34	0.385059	0.265	0.13	2.12038e-30	GBM.rec.PBMC	DENND1C	0.135	P1_CD8+GZMB+GZMH+
WAS	3.59839e-33	0.384553	0.504	0.352	4.81069e-29	GBM.rec.PBMC	WAS	0.152	P1_CD8+GZMB+GZMH+
RALY	5.66673e-43	0.384324	0.496	0.306	7.57586e-39	GBM.rec.PBMC	RALY	0.19	P1_CD8+GZMB+GZMH+
FTL	1.38437e-85	0.3809	0.972	0.973	1.85077e-81	GBM.rec.PBMC	FTL	-0.001	P1_CD8+GZMB+GZMH+
SARAF	1.57236e-42	0.377014	0.803	0.729	2.10209e-38	GBM.rec.PBMC	SARAF	0.074	P1_CD8+GZMB+GZMH+
ARHGDIA	9.57727e-34	0.376676	0.588	0.417	1.28039e-29	GBM.rec.PBMC	ARHGDIA	0.171	P1_CD8+GZMB+GZMH+
LITAF	1.2265e-36	0.373658	0.759	0.676	1.63971e-32	GBM.rec.PBMC	LITAF	0.083	P1_CD8+GZMB+GZMH+
KDELR1	6.77717e-31	0.372288	0.289	0.158	9.0604e-27	GBM.rec.PBMC	KDELR1	0.131	P1_CD8+GZMB+GZMH+
ADAM8	7.57648e-37	0.369434	0.311	0.16	1.0129e-32	GBM.rec.PBMC	ADAM8	0.151	P1_CD8+GZMB+GZMH+
G6PD	1.47726e-36	0.369082	0.301	0.152	1.97495e-32	GBM.rec.PBMC	G6PD	0.149	P1_CD8+GZMB+GZMH+
TRABD	4.72223e-30	0.363725	0.357	0.216	6.31315e-26	GBM.rec.PBMC	TRABD	0.141	P1_CD8+GZMB+GZMH+
HPS1	1.77801e-31	0.362425	0.281	0.149	2.37703e-27	GBM.rec.PBMC	HPS1	0.132	P1_CD8+GZMB+GZMH+
ARHGEF1	3.70076e-30	0.360626	0.613	0.47	4.94755e-26	GBM.rec.PBMC	ARHGEF1	0.143	P1_CD8+GZMB+GZMH+
ARRB2	1.27442e-28	0.35965	0.514	0.369	1.70377e-24	GBM.rec.PBMC	ARRB2	0.145	P1_CD8+GZMB+GZMH+
PPP3CC	2.577e-32	0.35916	0.358	0.213	3.44519e-28	GBM.rec.PBMC	PPP3CC	0.145	P1_CD8+GZMB+GZMH+
NAPA	5.0117e-39	0.356973	0.317	0.158	6.70015e-35	GBM.rec.PBMC	NAPA	0.159	P1_CD8+GZMB+GZMH+
SHKBP1	2.94624e-29	0.354667	0.317	0.176	3.93883e-25	GBM.rec.PBMC	SHKBP1	0.141	P1_CD8+GZMB+GZMH+
2021-09-01	6.24127e-31	0.352963	0.512	0.354	8.34395e-27	GBM.rec.PBMC	2021-09-01	0.158	P1_CD8+GZMB+GZMH+
AGTRAP	7.75173e-23	0.351027	0.319	0.199	1.03633e-18	GBM.rec.PBMC	AGTRAP	0.12	P1_CD8+GZMB+GZMH+
LRP10	4.05132e-38	0.348787	0.367	0.199	5.41621e-34	GBM.rec.PBMC	LRP10	0.168	P1_CD8+GZMB+GZMH+
MGAT1	7.80718e-25	0.348309	0.304	0.181	1.04374e-20	GBM.rec.PBMC	MGAT1	0.123	P1_CD8+GZMB+GZMH+
SQSTM1	1.64622e-24	0.347287	0.428	0.292	2.20084e-20	GBM.rec.PBMC	SQSTM1	0.136	P1_CD8+GZMB+GZMH+
ABHD14B	2.63525e-40	0.345974	0.335	0.169	3.52307e-36	GBM.rec.PBMC	ABHD14B	0.166	P1_CD8+GZMB+GZMH+
CST7	1.08043e-54	0.344926	0.877	0.916	1.44443e-50	GBM.rec.PBMC	CST7	-0.039	P1_CD8+GZMB+GZMH+
CDC25B	1.08645e-34	0.34492	0.41	0.247	1.45248e-30	GBM.rec.PBMC	CDC25B	0.163	P1_CD8+GZMB+GZMH+
TKT	6.53054e-12	0.343507	0.332	0.247	8.73067e-08	GBM.rec.PBMC	TKT	0.085	P1_CD8+GZMB+GZMH+
ARF1	5.00907e-33	0.342846	0.653	0.507	6.69662e-29	GBM.rec.PBMC	ARF1	0.146	P1_CD8+GZMB+GZMH+
PAXX	3.96273e-28	0.338058	0.708	0.598	5.29777e-24	GBM.rec.PBMC	PAXX	0.11	P1_CD8+GZMB+GZMH+
CD99	3.30049e-42	0.337577	0.833	0.809	4.41243e-38	GBM.rec.PBMC	CD99	0.024	P1_CD8+GZMB+GZMH+
HLA-DRB5	6.25731e-14	0.33746	0.288	0.197	8.36539e-10	GBM.rec.PBMC	HLA-DRB5	0.091	P1_CD8+GZMB+GZMH+
CYTIP	2.54362e-19	0.335605	0.586	0.478	3.40057e-15	GBM.rec.PBMC	CYTIP	0.108	P1_CD8+GZMB+GZMH+
RNF167	2.96998e-24	0.33554	0.457	0.314	3.97056e-20	GBM.rec.PBMC	RNF167	0.143	P1_CD8+GZMB+GZMH+
NUCB1	7.70393e-33	0.334367	0.401	0.242	1.02994e-28	GBM.rec.PBMC	NUCB1	0.159	P1_CD8+GZMB+GZMH+
CDK2AP2	1.11394e-24	0.334314	0.421	0.286	1.48922e-20	GBM.rec.PBMC	CDK2AP2	0.135	P1_CD8+GZMB+GZMH+
PGAM1	5.90451e-31	0.331247	0.554	0.386	7.89374e-27	GBM.rec.PBMC	PGAM1	0.168	P1_CD8+GZMB+GZMH+
LCP2	1.0651e-22	0.330503	0.464	0.335	1.42393e-18	GBM.rec.PBMC	LCP2	0.129	P1_CD8+GZMB+GZMH+
EWSR1	4.26835e-23	0.330334	0.426	0.296	5.70636e-19	GBM.rec.PBMC	EWSR1	0.13	P1_CD8+GZMB+GZMH+
SNRPA	1.8335e-29	0.330035	0.285	0.155	2.45121e-25	GBM.rec.PBMC	SNRPA	0.13	P1_CD8+GZMB+GZMH+
OTUB1	5.1455e-34	0.329563	0.394	0.232	6.87902e-30	GBM.rec.PBMC	OTUB1	0.162	P1_CD8+GZMB+GZMH+
SCAMP2	3.75622e-28	0.329269	0.372	0.234	5.02169e-24	GBM.rec.PBMC	SCAMP2	0.138	P1_CD8+GZMB+GZMH+
P2RY8	2.1394e-20	0.329007	0.35	0.235	2.86016e-16	GBM.rec.PBMC	P2RY8	0.115	P1_CD8+GZMB+GZMH+
CYFIP2	9.51876e-28	0.323939	0.508	0.353	1.27256e-23	GBM.rec.PBMC	CYFIP2	0.155	P1_CD8+GZMB+GZMH+
SDF4	1.14455e-22	0.323563	0.355	0.231	1.53015e-18	GBM.rec.PBMC	SDF4	0.124	P1_CD8+GZMB+GZMH+
CHCHD10	7.20096e-15	0.32225	0.343	0.247	9.62696e-11	GBM.rec.PBMC	CHCHD10	0.096	P1_CD8+GZMB+GZMH+
JUN	4.88514e-129	1.11697	0.672	0.419	6.53094e-125	HealthyDonor	JUN	0.253	P1_CD8+GZMB+GZMH+
TRBC1	1.57823e-121	0.919935	0.759	0.527	2.10993e-117	HealthyDonor	TRBC1	0.232	P1_CD8+GZMB+GZMH+
TRAC	3.888e-190	0.869733	0.887	0.686	5.19786e-186	HealthyDonor	TRAC	0.201	P1_CD8+GZMB+GZMH+
LGALS1	3.14889e-110	0.841607	0.759	0.535	4.20974e-106	HealthyDonor	LGALS1	0.224	P1_CD8+GZMB+GZMH+
GNLY	2.19084e-142	0.769509	0.865	0.594	2.92893e-138	HealthyDonor	GNLY	0.271	P1_CD8+GZMB+GZMH+
C1orf56	1.93347e-36	0.700586	0.323	0.186	2.58486e-32	HealthyDonor	C1orf56	0.137	P1_CD8+GZMB+GZMH+
IL2RG	1.52705e-89	0.67403	0.681	0.515	2.04151e-85	HealthyDonor	IL2RG	0.166	P1_CD8+GZMB+GZMH+
NDUFA13	4.24197e-70	0.673986	0.534	0.347	5.67109e-66	HealthyDonor	NDUFA13	0.187	P1_CD8+GZMB+GZMH+
IER2	3.73801e-51	0.665735	0.635	0.56	4.99735e-47	HealthyDonor	IER2	0.075	P1_CD8+GZMB+GZMH+
TMSB4X	0	0.652348	1	0.997	0	HealthyDonor	TMSB4X	0.003	P1_CD8+GZMB+GZMH+
TRGC1	9.44708e-26	0.602406	0.261	0.148	1.26298e-21	HealthyDonor	TRGC1	0.113	P1_CD8+GZMB+GZMH+
S100A4	2.55533e-182	0.579448	0.991	0.957	3.41622e-178	HealthyDonor	S100A4	0.034	P1_CD8+GZMB+GZMH+
CD52	1.37623e-159	0.577656	0.988	0.928	1.83988e-155	HealthyDonor	CD52	0.06	P1_CD8+GZMB+GZMH+
UBB	1.88115e-153	0.574927	0.94	0.862	2.51491e-149	HealthyDonor	UBB	0.078	P1_CD8+GZMB+GZMH+
CRIP1	2.01223e-35	0.574846	0.482	0.373	2.69015e-31	HealthyDonor	CRIP1	0.109	P1_CD8+GZMB+GZMH+
PSMA2	1.77099e-31	0.560316	0.344	0.224	2.36763e-27	HealthyDonor	PSMA2	0.12	P1_CD8+GZMB+GZMH+
GADD45B	1.13999e-28	0.555311	0.398	0.293	1.52405e-24	HealthyDonor	GADD45B	0.105	P1_CD8+GZMB+GZMH+
TMED2	9.74247e-36	0.537584	0.454	0.346	1.30247e-31	HealthyDonor	TMED2	0.108	P1_CD8+GZMB+GZMH+
EIF5A	4.23166e-42	0.535046	0.579	0.502	5.6573e-38	HealthyDonor	EIF5A	0.077	P1_CD8+GZMB+GZMH+
VAMP2	3.13186e-55	0.526066	0.649	0.552	4.18698e-51	HealthyDonor	VAMP2	0.097	P1_CD8+GZMB+GZMH+
DUSP11	1.17628e-22	0.525221	0.453	0.387	1.57257e-18	HealthyDonor	DUSP1	0.066	P1_CD8+GZMB+GZMH+
SEC61G	2.02008e-47	0.513727	0.592	0.509	2.70065e-43	HealthyDonor	SEC61G	0.083	P1_CD8+GZMB+GZMH+
ID2	3.63878e-59	0.510635	0.761	0.661	4.86469e-55	HealthyDonor	ID2	0.1	P1_CD8+GZMB+GZMH+
CD53	5.81577e-58	0.510188	0.698	0.616	7.7751e-54	HealthyDonor	CD53	0.082	P1_CD8+GZMB+GZMH+
GZMH	2.15031e-141	0.509388	0.992	0.912	2.87475e-137	HealthyDonor	GZMH	0.08	P1_CD8+GZMB+GZMH+
B2M	0	0.509173	1	0.999	0	HealthyDonor	B2M	0.001	P1_CD8+GZMB+GZMH+
PET100	8.59705e-27	0.49865	0.44	0.361	1.14934e-22	HealthyDonor	PET100	0.079	P1_CD8+GZMB+GZMH+
HOPX	1.17054e-46	0.497058	0.614	0.474	1.56489e-42	HealthyDonor	HOPX	0.14	P1_CD8+GZMB+GZMH+
HLA-C	3.14879e-277	0.494288	0.997	0.982	4.20961e-273	HealthyDonor	HLA-C	0.015	P1_CD8+GZMB+GZMH+
HLA-A	1.16359e-251	0.491793	0.999	0.991	1.5556e-247	HealthyDonor	HLA-A	0.008	P1_CD8+GZMB+GZMH+
NDUFB1	3.0174e-18	0.485755	0.409	0.36	4.03396e-14	HealthyDonor	NDUFB1	0.049	P1_CD8+GZMB+GZMH+
PFN11	2.73123e-155	0.485745	0.991	0.944	3.65138e-151	HealthyDonor	PFN1	0.047	P1_CD8+GZMB+GZMH+
FCRL6	2.31361e-22	0.475587	0.447	0.383	3.09307e-18	HealthyDonor	FCRL6	0.064	P1_CD8+GZMB+GZMH+
CD320	1.32805e-13	0.474042	0.273	0.207	1.77546e-09	HealthyDonor	CD320	0.066	P1_CD8+GZMB+GZMH+
FXYD51	7.38144e-55	0.470746	0.695	0.559	9.86824e-51	HealthyDonor	FXYD5	0.136	P1_CD8+GZMB+GZMH+
ARPC1B	6.2729e-47	0.461918	0.67	0.599	8.38625e-43	HealthyDonor	ARPC1B	0.071	P1_CD8+GZMB+GZMH+
ARL6IP1	1.37952e-20	0.461	0.376	0.3	1.84428e-16	HealthyDonor	ARL6IP1	0.076	P1_CD8+GZMB+GZMH+
ARPC4	5.78906e-33	0.457094	0.509	0.41	7.7394e-29	HealthyDonor	ARPC4	0.099	P1_CD8+GZMB+GZMH+
IL32	1.98885e-137	0.447319	0.991	0.948	2.65889e-133	HealthyDonor	IL32	0.043	P1_CD8+GZMB+GZMH+
FOS	8.01463e-20	0.446125	0.43	0.35	1.07148e-15	HealthyDonor	FOS	0.08	P1_CD8+GZMB+GZMH+
TMA7	1.62608e-104	0.444834	0.942	0.892	2.17391e-100	HealthyDonor	TMA7	0.05	P1_CD8+GZMB+GZMH+
POLR2L	3.18732e-30	0.443881	0.558	0.502	4.26113e-26	HealthyDonor	POLR2L	0.056	P1_CD8+GZMB+GZMH+
SNRPD2	5.26751e-51	0.438653	0.729	0.67	7.04213e-47	HealthyDonor	SNRPD2	0.059	P1_CD8+GZMB+GZMH+
TMSB10	2.09704e-204	0.438266	0.997	0.989	2.80354e-200	HealthyDonor	TMSB10	0.008	P1_CD8+GZMB+GZMH+
S100A6	9.556e-102	0.437323	0.972	0.937	1.27754e-97	HealthyDonor	S100A6	0.035	P1_CD8+GZMB+GZMH+
CKLF	2.89405e-16	0.432993	0.363	0.304	3.86905e-12	HealthyDonor	CKLF	0.059	P1_CD8+GZMB+GZMH+
NDUFA11	1.68904e-21	0.432465	0.437	0.375	2.25808e-17	HealthyDonor	NDUFA11	0.062	P1_CD8+GZMB+GZMH+
ACTB1	1.3353e-138	0.432012	0.999	0.986	1.78516e-134	HealthyDonor	ACTB	0.013	P1_CD8+GZMB+GZMH+
C12orf75	4.64944e-37	0.426656	0.663	0.618	6.21583e-33	HealthyDonor	C12orf75	0.045	P1_CD8+GZMB+GZMH+
UQCR11	4.14412e-41	0.423642	0.704	0.67	5.54028e-37	HealthyDonor	UQCR11	0.034	P1_CD8+GZMB+GZMH+
GSTK1	1.82129e-32	0.421113	0.627	0.585	2.43489e-28	HealthyDonor	GSTK1	0.042	P1_CD8+GZMB+GZMH+
LY6E	1.53575e-42	0.402104	0.71	0.634	2.05314e-38	HealthyDonor	LY6E	0.076	P1_CD8+GZMB+GZMH+
CD3D	5.40554e-90	0.39737	0.954	0.887	7.22667e-86	HealthyDonor	CD3D	0.067	P1_CD8+GZMB+GZMH+
TOMM7	1.43767e-69	0.39624	0.932	0.891	1.92202e-65	HealthyDonor	TOMM7	0.041	P1_CD8+GZMB+GZMH+
EIF4A2	2.79002e-27	0.392901	0.63	0.611	3.72997e-23	HealthyDonor	EIF4A2	0.019	P1_CD8+GZMB+GZMH+
CSNK2B	1.24966e-12	0.39265	0.289	0.229	1.67067e-08	HealthyDonor	CSNK2B	0.06	P1_CD8+GZMB+GZMH+
YWHAQ	3.49716e-21	0.391559	0.558	0.542	4.67535e-17	HealthyDonor	YWHAQ	0.016	P1_CD8+GZMB+GZMH+
ARF6	1.57778e-23	0.390941	0.562	0.535	2.10934e-19	HealthyDonor	ARF6	0.027	P1_CD8+GZMB+GZMH+
CUTA	1.38989e-17	0.390899	0.493	0.468	1.85814e-13	HealthyDonor	CUTA	0.025	P1_CD8+GZMB+GZMH+
ERH	2.22111e-17	0.387947	0.458	0.427	2.9694e-13	HealthyDonor	ERH	0.031	P1_CD8+GZMB+GZMH+
CALM2	6.09103e-39	0.383877	0.714	0.684	8.1431e-35	HealthyDonor	CALM2	0.03	P1_CD8+GZMB+GZMH+
UQCRB	2.87591e-55	0.38325	0.87	0.841	3.84481e-51	HealthyDonor	UQCRB	0.029	P1_CD8+GZMB+GZMH+
HCST	2.77698e-74	0.379234	0.965	0.929	3.71255e-70	HealthyDonor	HCST	0.036	P1_CD8+GZMB+GZMH+
H3F3B	8.75253e-67	0.378828	0.953	0.921	1.17013e-62	HealthyDonor	H3F3B	0.032	P1_CD8+GZMB+GZMH+
UQCRQ	1.51373e-16	0.376892	0.455	0.423	2.0237e-12	HealthyDonor	UQCRQ	0.032	P1_CD8+GZMB+GZMH+
TMEM258	6.86439e-22	0.375041	0.567	0.549	9.17701e-18	HealthyDonor	TMEM258	0.018	P1_CD8+GZMB+GZMH+
NDUFA3	3.45952e-15	0.366913	0.46	0.434	4.62503e-11	HealthyDonor	NDUFA3	0.026	P1_CD8+GZMB+GZMH+
MINOS1	9.39792e-13	0.364747	0.397	0.367	1.25641e-08	HealthyDonor	MINOS1	0.03	P1_CD8+GZMB+GZMH+
GPSM3	1.18666e-26	0.362834	0.655	0.629	1.58644e-22	HealthyDonor	GPSM3	0.026	P1_CD8+GZMB+GZMH+
TRMT112	8.28446e-13	0.361336	0.48	0.482	1.10755e-08	HealthyDonor	TRMT112	-0.002	P1_CD8+GZMB+GZMH+
PTMA	1.07972e-114	0.358372	0.993	0.973	1.44348e-110	HealthyDonor	PTMA	0.02	P1_CD8+GZMB+GZMH+
MYL12A	1.50933e-79	0.357131	0.973	0.936	2.01783e-75	HealthyDonor	MYL12A	0.037	P1_CD8+GZMB+GZMH+
RBM3	1.29659e-25	0.354383	0.649	0.624	1.73341e-21	HealthyDonor	RBM3	0.025	P1_CD8+GZMB+GZMH+
PRR13	4.50939e-20	0.350573	0.566	0.557	6.0286e-16	HealthyDonor	PRR13	0.009	P1_CD8+GZMB+GZMH+
OST4	9.7223e-38	0.34969	0.815	0.803	1.29977e-33	HealthyDonor	OST4	0.012	P1_CD8+GZMB+GZMH+
TAGLN21	2.46075e-17	0.348654	0.573	0.544	3.28977e-13	HealthyDonor	TAGLN2	0.029	P1_CD8+GZMB+GZMH+
LAT	2.32319e-16	0.347252	0.516	0.499	3.10588e-12	HealthyDonor	LAT	0.017	P1_CD8+GZMB+GZMH+
CFL1	2.81061e-80	0.346401	0.968	0.934	3.7575e-76	HealthyDonor	CFL1	0.034	P1_CD8+GZMB+GZMH+
NDUFA1	1.36871e-23	0.343385	0.624	0.629	1.82983e-19	HealthyDonor	NDUFA1	-0.005	P1_CD8+GZMB+GZMH+
COX7C	1.06857e-45	0.343351	0.872	0.855	1.42858e-41	HealthyDonor	COX7C	0.017	P1_CD8+GZMB+GZMH+
HMGB2	1.01665e-08	0.340285	0.426	0.432	0.000135916	HealthyDonor	HMGB2	-0.006	P1_CD8+GZMB+GZMH+
RSL24D1	1.95937e-12	0.339365	0.444	0.433	2.61949e-08	HealthyDonor	RSL24D1	0.011	P1_CD8+GZMB+GZMH+
EMP3	7.9431e-45	0.338346	0.874	0.863	1.06191e-40	HealthyDonor	EMP3	0.011	P1_CD8+GZMB+GZMH+
SNRPE	8.21972e-08	0.333567	0.35	0.337	0.00109889	HealthyDonor	SNRPE	0.013	P1_CD8+GZMB+GZMH+
LAMTOR4	4.36481e-18	0.333121	0.559	0.557	5.83532e-14	HealthyDonor	LAMTOR4	0.002	P1_CD8+GZMB+GZMH+
NDUFC2	4.2335e-09	0.331489	0.367	0.347	5.65976e-05	HealthyDonor	NDUFC2	0.02	P1_CD8+GZMB+GZMH+
SH3BGRL3	3.8154e-89	0.330204	0.989	0.956	5.1008e-85	HealthyDonor	SH3BGRL3	0.033	P1_CD8+GZMB+GZMH+
SELENOT	2.09666e-09	0.329033	0.371	0.353	2.80302e-05	HealthyDonor	SELENOT	0.018	P1_CD8+GZMB+GZMH+
RNF181	4.91381e-05	0.328907	0.261	0.247	0.656927	HealthyDonor	RNF181	0.014	P1_CD8+GZMB+GZMH+
COX6C	4.50793e-29	0.327205	0.736	0.744	6.02666e-25	HealthyDonor	COX6C	-0.008	P1_CD8+GZMB+GZMH+
COX7A2	1.56893e-25	0.325336	0.662	0.661	2.0975e-21	HealthyDonor	COX7A2	0.001	P1_CD8+GZMB+GZMH+
NDUFA4	2.32283e-25	0.324336	0.668	0.685	3.10539e-21	HealthyDonor	NDUFA4	-0.017	P1_CD8+GZMB+GZMH+
PTGDS	1.73862e-05	1.41476	0.26	0.064	0.232436	GBM.pembro.PBMC	PTGDS	0.196	P10_CD4+CD8+Naive
JUND	9.14369e-32	1.1978	0.939	0.319	1.22242e-27	GBM.pembro.PBMC	JUND	0.62	P10_CD4+CD8+Naive
DDX3Y	4.367e-16	0.860416	0.465	0	5.83825e-12	GBM.pembro.PBMC	DDX3Y	0.465	P10_CD4+CD8+Naive
GCC2	2.16592e-19	0.825305	0.869	0.511	2.89561e-15	GBM.pembro.PBMC	GCC2	0.358	P10_CD4+CD8+Naive
SYNE2	1.24497e-21	0.818678	0.941	0.755	1.6644e-17	GBM.pembro.PBMC	SYNE2	0.186	P10_CD4+CD8+Naive
KLF2	1.23371e-23	0.797891	0.971	0.734	1.64935e-19	GBM.pembro.PBMC	KLF2	0.237	P10_CD4+CD8+Naive
FAM107B	2.93858e-19	0.790537	0.91	0.543	3.92858e-15	GBM.pembro.PBMC	FAM107B	0.367	P10_CD4+CD8+Naive
MALAT1	9.39537e-31	0.779176	1	1	1.25607e-26	GBM.pembro.PBMC	MALAT1	0	P10_CD4+CD8+Naive
HIST1H1D	3.59881e-16	0.767691	0.877	0.457	4.81125e-12	GBM.pembro.PBMC	HIST1H1D	0.42	P10_CD4+CD8+Naive
CCNL1	1.44856e-18	0.763727	0.918	0.543	1.93658e-14	GBM.pembro.PBMC	CCNL1	0.375	P10_CD4+CD8+Naive
URI1	2.46342e-17	0.752436	0.744	0.245	3.29334e-13	GBM.pembro.PBMC	URI1	0.499	P10_CD4+CD8+Naive
ETS1	1.00595e-20	0.73356	0.953	0.713	1.34485e-16	GBM.pembro.PBMC	ETS1	0.24	P10_CD4+CD8+Naive
BCLAF1	5.57191e-16	0.731161	0.842	0.426	7.44909e-12	GBM.pembro.PBMC	BCLAF1	0.416	P10_CD4+CD8+Naive
FOSB	1.44578e-08	0.724953	0.623	0.33	0.000193286	GBM.pembro.PBMC	FOSB	0.293	P10_CD4+CD8+Naive
CDV3	4.0201e-17	0.724389	0.816	0.34	5.37447e-13	GBM.pembro.PBMC	CDV3	0.476	P10_CD4+CD8+Naive
TNRC6B	2.55643e-17	0.715556	0.906	0.553	3.4177e-13	GBM.pembro.PBMC	TNRC6B	0.353	P10_CD4+CD8+Naive
BPTF	3.58379e-16	0.710496	0.875	0.489	4.79116e-12	GBM.pembro.PBMC	BPTF	0.386	P10_CD4+CD8+Naive
PRPF4B	7.88586e-17	0.708856	0.836	0.415	1.05426e-12	GBM.pembro.PBMC	PRPF4B	0.421	P10_CD4+CD8+Naive
SRRM2	6.86828e-19	0.705777	0.926	0.606	9.1822e-15	GBM.pembro.PBMC	SRRM2	0.32	P10_CD4+CD8+Naive
ARID1B	9.68187e-16	0.700644	0.799	0.351	1.29437e-11	GBM.pembro.PBMC	ARID1B	0.448	P10_CD4+CD8+Naive
BOD1L1	2.4212e-15	0.69973	0.797	0.372	3.2369e-11	GBM.pembro.PBMC	BOD1L1	0.425	P10_CD4+CD8+Naive
R3HDM2	4.84625e-15	0.695488	0.609	0.149	6.47895e-11	GBM.pembro.PBMC	R3HDM2	0.46	P10_CD4+CD8+Naive
VPS13C	1.28627e-16	0.686647	0.848	0.394	1.71961e-12	GBM.pembro.PBMC	VPS13C	0.454	P10_CD4+CD8+Naive
NEAT1	1.36351e-15	0.682671	0.969	0.819	1.82288e-11	GBM.pembro.PBMC	NEAT1	0.15	P10_CD4+CD8+Naive
PNN	8.931e-16	0.681844	0.889	0.564	1.19399e-11	GBM.pembro.PBMC	PNN	0.325	P10_CD4+CD8+Naive
MZT2B	8.32013e-18	0.681757	0.908	0.564	1.11232e-13	GBM.pembro.PBMC	MZT2B	0.344	P10_CD4+CD8+Naive
NDUFB8	1.08304e-17	0.680268	0.791	0.309	1.44792e-13	GBM.pembro.PBMC	NDUFB8	0.482	P10_CD4+CD8+Naive
RCAN3	4.22758e-11	0.67467	0.703	0.383	5.65185e-07	GBM.pembro.PBMC	RCAN3	0.32	P10_CD4+CD8+Naive
HIST1H1E	4.7906e-15	0.673341	0.861	0.383	6.40455e-11	GBM.pembro.PBMC	HIST1H1E	0.478	P10_CD4+CD8+Naive
AAK1	5.56861e-18	0.664437	0.916	0.628	7.44468e-14	GBM.pembro.PBMC	AAK1	0.288	P10_CD4+CD8+Naive
AKAP9	1.26441e-13	0.659204	0.844	0.5	1.69039e-09	GBM.pembro.PBMC	AKAP9	0.344	P10_CD4+CD8+Naive
CD81	2.94143e-15	0.658761	0.793	0.34	3.93239e-11	GBM.pembro.PBMC	CD81	0.453	P10_CD4+CD8+Naive
RIPOR2	5.84005e-19	0.647692	0.951	0.809	7.80756e-15	GBM.pembro.PBMC	RIPOR2	0.142	P10_CD4+CD8+Naive
ARL4C	3.4637e-17	0.647629	0.953	0.766	4.63062e-13	GBM.pembro.PBMC	ARL4C	0.187	P10_CD4+CD8+Naive
HIST2H2AC	7.03888e-15	0.645845	0.619	0.17	9.41028e-11	GBM.pembro.PBMC	HIST2H2AC	0.449	P10_CD4+CD8+Naive
KMT2A	1.1881e-17	0.638493	0.82	0.33	1.58837e-13	GBM.pembro.PBMC	KMT2A	0.49	P10_CD4+CD8+Naive
PIK3R1	2.28453e-13	0.635811	0.871	0.543	3.05418e-09	GBM.pembro.PBMC	PIK3R1	0.328	P10_CD4+CD8+Naive
RNF19A	1.08317e-11	0.631182	0.682	0.277	1.44808e-07	GBM.pembro.PBMC	RNF19A	0.405	P10_CD4+CD8+Naive
SLC38A2	6.37251e-10	0.630084	0.678	0.351	8.51941e-06	GBM.pembro.PBMC	SLC38A2	0.327	P10_CD4+CD8+Naive
GOLGB1	2.02405e-12	0.629139	0.693	0.255	2.70596e-08	GBM.pembro.PBMC	GOLGB1	0.438	P10_CD4+CD8+Naive
PARP14	2.5478e-12	0.625354	0.631	0.223	3.40615e-08	GBM.pembro.PBMC	PARP14	0.408	P10_CD4+CD8+Naive
ATM	3.42349e-16	0.624337	0.932	0.638	4.57687e-12	GBM.pembro.PBMC	ATM	0.294	P10_CD4+CD8+Naive
NKTR	2.02732e-13	0.624042	0.852	0.5	2.71032e-09	GBM.pembro.PBMC	NKTR	0.352	P10_CD4+CD8+Naive
BCL11B	8.6434e-12	0.613379	0.764	0.394	1.15554e-07	GBM.pembro.PBMC	BCL11B	0.37	P10_CD4+CD8+Naive
GNAS	4.73798e-15	0.613042	0.926	0.606	6.3342e-11	GBM.pembro.PBMC	GNAS	0.32	P10_CD4+CD8+Naive
KIAA1551	1.25541e-13	0.610946	0.906	0.585	1.67836e-09	GBM.pembro.PBMC	KIAA1551	0.321	P10_CD4+CD8+Naive
TMBIM4	2.22913e-14	0.610049	0.711	0.255	2.98012e-10	GBM.pembro.PBMC	TMBIM4	0.456	P10_CD4+CD8+Naive
KLF13	7.93512e-15	0.603086	0.852	0.415	1.06085e-10	GBM.pembro.PBMC	KLF13	0.437	P10_CD4+CD8+Naive
BRD7	5.87535e-18	0.59643	0.754	0.223	7.85475e-14	GBM.pembro.PBMC	BRD7	0.531	P10_CD4+CD8+Naive
HIST1H4C	2.4241e-16	0.592654	0.9	0.574	3.24077e-12	GBM.pembro.PBMC	HIST1H4C	0.326	P10_CD4+CD8+Naive
CDC14A	7.89047e-10	0.588818	0.65	0.298	1.05488e-05	GBM.pembro.PBMC	CDC14A	0.352	P10_CD4+CD8+Naive
H1FX	1.76074e-10	0.588591	0.699	0.319	2.35394e-06	GBM.pembro.PBMC	H1FX	0.38	P10_CD4+CD8+Naive
GLS	3.99042e-14	0.586538	0.725	0.287	5.33479e-10	GBM.pembro.PBMC	GLS	0.438	P10_CD4+CD8+Naive
ZRANB2	2.50696e-11	0.584864	0.826	0.457	3.35156e-07	GBM.pembro.PBMC	ZRANB2	0.369	P10_CD4+CD8+Naive
SUPT16H	1.09774e-11	0.582614	0.703	0.309	1.46757e-07	GBM.pembro.PBMC	SUPT16H	0.394	P10_CD4+CD8+Naive
NUFIP2	5.33425e-11	0.58253	0.629	0.255	7.13136e-07	GBM.pembro.PBMC	NUFIP2	0.374	P10_CD4+CD8+Naive
ANKRD36C	1.08001e-10	0.580801	0.529	0.16	1.44387e-06	GBM.pembro.PBMC	ANKRD36C	0.369	P10_CD4+CD8+Naive
SMAP2	3.08046e-12	0.580148	0.834	0.479	4.11826e-08	GBM.pembro.PBMC	SMAP2	0.355	P10_CD4+CD8+Naive
PIP4K2A	9.7003e-17	0.578666	0.848	0.372	1.29683e-12	GBM.pembro.PBMC	PIP4K2A	0.476	P10_CD4+CD8+Naive
ARGLU1	1.39561e-15	0.576503	0.936	0.67	1.86579e-11	GBM.pembro.PBMC	ARGLU1	0.266	P10_CD4+CD8+Naive
PCM1	2.05756e-12	0.576117	0.803	0.415	2.75075e-08	GBM.pembro.PBMC	PCM1	0.388	P10_CD4+CD8+Naive
PPP2R5C	1.16718e-14	0.573413	0.943	0.681	1.5604e-10	GBM.pembro.PBMC	PPP2R5C	0.262	P10_CD4+CD8+Naive
DDX24	4.41919e-14	0.569299	0.928	0.66	5.90802e-10	GBM.pembro.PBMC	DDX24	0.268	P10_CD4+CD8+Naive
DDX21	6.38074e-09	0.568108	0.703	0.415	8.53041e-05	GBM.pembro.PBMC	DDX21	0.288	P10_CD4+CD8+Naive
CWF19L2	4.01424e-11	0.559775	0.633	0.234	5.36664e-07	GBM.pembro.PBMC	CWF19L2	0.399	P10_CD4+CD8+Naive
SMARCA5	1.0335e-10	0.557634	0.715	0.362	1.38168e-06	GBM.pembro.PBMC	SMARCA5	0.353	P10_CD4+CD8+Naive
PHF3	1.11885e-12	0.555348	0.781	0.383	1.49578e-08	GBM.pembro.PBMC	PHF3	0.398	P10_CD4+CD8+Naive
RBM26	5.49005e-10	0.551491	0.566	0.223	7.33964e-06	GBM.pembro.PBMC	RBM26	0.343	P10_CD4+CD8+Naive
BDP1	8.75362e-11	0.551259	0.73	0.351	1.17027e-06	GBM.pembro.PBMC	BDP1	0.379	P10_CD4+CD8+Naive
FNBP1	1.33815e-12	0.55097	0.881	0.574	1.78898e-08	GBM.pembro.PBMC	FNBP1	0.307	P10_CD4+CD8+Naive
EPC2	2.26187e-11	0.54939	0.457	0.085	3.0239e-07	GBM.pembro.PBMC	EPC2	0.372	P10_CD4+CD8+Naive
CDK13	1.57499e-11	0.548849	0.752	0.351	2.10561e-07	GBM.pembro.PBMC	CDK13	0.401	P10_CD4+CD8+Naive
NFKB1	3.33465e-09	0.547359	0.566	0.223	4.4581e-05	GBM.pembro.PBMC	NFKB1	0.343	P10_CD4+CD8+Naive
TUT4	1.75281e-12	0.547313	0.773	0.394	2.34333e-08	GBM.pembro.PBMC	TUT4	0.379	P10_CD4+CD8+Naive
ANKRD11	1.8183e-11	0.545856	0.865	0.521	2.43088e-07	GBM.pembro.PBMC	ANKRD11	0.344	P10_CD4+CD8+Naive
USP34	3.11e-10	0.545275	0.697	0.34	4.15776e-06	GBM.pembro.PBMC	USP34	0.357	P10_CD4+CD8+Naive
RORA	4.99942e-10	0.545205	0.811	0.521	6.68372e-06	GBM.pembro.PBMC	RORA	0.29	P10_CD4+CD8+Naive
CHD3	6.23528e-09	0.544854	0.682	0.362	8.33594e-05	GBM.pembro.PBMC	CHD3	0.32	P10_CD4+CD8+Naive
GOLGA8A	3.87649e-11	0.543368	0.43	0.064	5.18248e-07	GBM.pembro.PBMC	GOLGA8A	0.366	P10_CD4+CD8+Naive
KIAA1109	1.34016e-09	0.543358	0.566	0.213	1.79166e-05	GBM.pembro.PBMC	KIAA1109	0.353	P10_CD4+CD8+Naive
PRKDC	3.43837e-10	0.541909	0.719	0.319	4.59675e-06	GBM.pembro.PBMC	PRKDC	0.4	P10_CD4+CD8+Naive
MAP4K4	2.45857e-10	0.539915	0.578	0.213	3.28687e-06	GBM.pembro.PBMC	MAP4K4	0.365	P10_CD4+CD8+Naive
ATF7IP	2.37657e-09	0.537464	0.725	0.415	3.17724e-05	GBM.pembro.PBMC	ATF7IP	0.31	P10_CD4+CD8+Naive
PDE3B	2.62917e-08	0.532364	0.6	0.287	0.000351494	GBM.pembro.PBMC	PDE3B	0.313	P10_CD4+CD8+Naive
PRDM2	3.74259e-11	0.531461	0.686	0.298	5.00348e-07	GBM.pembro.PBMC	PRDM2	0.388	P10_CD4+CD8+Naive
ANKRD12	2.66671e-13	0.530273	0.932	0.787	3.56512e-09	GBM.pembro.PBMC	ANKRD12	0.145	P10_CD4+CD8+Naive
SENP7	3.00218e-09	0.528963	0.508	0.17	4.01362e-05	GBM.pembro.PBMC	SENP7	0.338	P10_CD4+CD8+Naive
NIN	1.54204e-09	0.526957	0.629	0.266	2.06156e-05	GBM.pembro.PBMC	NIN	0.363	P10_CD4+CD8+Naive
GSPT1	1.18031e-09	0.526614	0.58	0.245	1.57795e-05	GBM.pembro.PBMC	GSPT1	0.335	P10_CD4+CD8+Naive
PPP4R3A	1.88727e-10	0.526424	0.656	0.287	2.52309e-06	GBM.pembro.PBMC	PPP4R3A	0.369	P10_CD4+CD8+Naive
RASGRP1	7.24585e-10	0.523267	0.723	0.372	9.68698e-06	GBM.pembro.PBMC	RASGRP1	0.351	P10_CD4+CD8+Naive
MACF1	6.75812e-13	0.521896	0.922	0.617	9.03493e-09	GBM.pembro.PBMC	MACF1	0.305	P10_CD4+CD8+Naive
CEP350	2.31701e-09	0.520678	0.711	0.362	3.09761e-05	GBM.pembro.PBMC	CEP350	0.349	P10_CD4+CD8+Naive
TMPO	2.05885e-12	0.520061	0.752	0.34	2.75248e-08	GBM.pembro.PBMC	TMPO	0.412	P10_CD4+CD8+Naive
CD226	3.95949e-09	0.519972	0.648	0.298	5.29345e-05	GBM.pembro.PBMC	CD226	0.35	P10_CD4+CD8+Naive
MYCBP2	1.55266e-09	0.519415	0.824	0.521	2.07575e-05	GBM.pembro.PBMC	MYCBP2	0.303	P10_CD4+CD8+Naive
TTTY15	1.56655e-09	0.519183	0.299	0	2.09433e-05	GBM.pembro.PBMC	TTTY15	0.299	P10_CD4+CD8+Naive
TRAPPC10	1.53108e-11	0.518753	0.652	0.234	2.0469e-07	GBM.pembro.PBMC	TRAPPC10	0.418	P10_CD4+CD8+Naive
DDX39B	1.35488e-12	0.518551	0.598	0.16	1.81134e-08	GBM.pembro.PBMC	DDX39B	0.438	P10_CD4+CD8+Naive
MDM4	2.84709e-10	0.518377	0.723	0.362	3.80627e-06	GBM.pembro.PBMC	MDM4	0.361	P10_CD4+CD8+Naive
SET	1.12643e-13	0.515932	0.951	0.691	1.50592e-09	GBM.pembro.PBMC	SET	0.26	P10_CD4+CD8+Naive
UBALD2	7.25789e-09	0.515077	0.625	0.266	9.70308e-05	GBM.pembro.PBMC	UBALD2	0.359	P10_CD4+CD8+Naive
JOSD1	3.16461e-09	0.512119	0.5	0.17	4.23076e-05	GBM.pembro.PBMC	JOSD1	0.33	P10_CD4+CD8+Naive
PNISR	2.13257e-14	0.510725	0.967	0.83	2.85104e-10	GBM.pembro.PBMC	PNISR	0.137	P10_CD4+CD8+Naive
RRBP1	1.07717e-10	0.506242	0.516	0.138	1.44007e-06	GBM.pembro.PBMC	RRBP1	0.378	P10_CD4+CD8+Naive
HEBP2	6.38278e-09	0.503479	0.516	0.191	8.53314e-05	GBM.pembro.PBMC	HEBP2	0.325	P10_CD4+CD8+Naive
CEP290	8.09816e-07	0.502731	0.367	0.106	0.0108264	GBM.pembro.PBMC	CEP290	0.261	P10_CD4+CD8+Naive
EP300	1.02559e-09	0.498069	0.518	0.181	1.37112e-05	GBM.pembro.PBMC	EP300	0.337	P10_CD4+CD8+Naive
ATRX	1.65811e-10	0.49801	0.887	0.66	2.21672e-06	GBM.pembro.PBMC	ATRX	0.227	P10_CD4+CD8+Naive
FXR1	5.91979e-09	0.496424	0.635	0.277	7.91416e-05	GBM.pembro.PBMC	FXR1	0.358	P10_CD4+CD8+Naive
ZBTB1	1.0563e-08	0.493676	0.586	0.245	0.000141217	GBM.pembro.PBMC	ZBTB1	0.341	P10_CD4+CD8+Naive
EXOSC6	1.94922e-09	0.49329	0.518	0.16	2.60591e-05	GBM.pembro.PBMC	EXOSC6	0.358	P10_CD4+CD8+Naive
CEMIP2	4.36795e-08	0.492468	0.738	0.489	0.000583951	GBM.pembro.PBMC	CEMIP2	0.249	P10_CD4+CD8+Naive
MBD2	4.9353e-10	0.491905	0.541	0.181	6.598e-06	GBM.pembro.PBMC	MBD2	0.36	P10_CD4+CD8+Naive
PJA2	2.14185e-10	0.48985	0.713	0.33	2.86344e-06	GBM.pembro.PBMC	PJA2	0.383	P10_CD4+CD8+Naive
RNMT	9.95748e-10	0.48886	0.695	0.34	1.33122e-05	GBM.pembro.PBMC	RNMT	0.355	P10_CD4+CD8+Naive
GOLGA4	3.77347e-09	0.488551	0.793	0.489	5.04475e-05	GBM.pembro.PBMC	GOLGA4	0.304	P10_CD4+CD8+Naive
CTDSPL2	2.49057e-09	0.488506	0.516	0.16	3.32964e-05	GBM.pembro.PBMC	CTDSPL2	0.356	P10_CD4+CD8+Naive
TNFAIP8	4.61683e-10	0.488223	0.799	0.457	6.17225e-06	GBM.pembro.PBMC	TNFAIP8	0.342	P10_CD4+CD8+Naive
IL2RG	2.36056e-11	0.488032	0.807	0.457	3.15584e-07	GBM.pembro.PBMC	IL2RG	0.35	P10_CD4+CD8+Naive
TPR	1.29705e-11	0.48671	0.9	0.574	1.73403e-07	GBM.pembro.PBMC	TPR	0.326	P10_CD4+CD8+Naive
TRIM44	3.20325e-08	0.485986	0.621	0.309	0.000428242	GBM.pembro.PBMC	TRIM44	0.312	P10_CD4+CD8+Naive
BIRC6	1.86177e-08	0.480733	0.68	0.372	0.0002489	GBM.pembro.PBMC	BIRC6	0.308	P10_CD4+CD8+Naive
ZBTB7A	2.98316e-08	0.480568	0.623	0.319	0.000398819	GBM.pembro.PBMC	ZBTB7A	0.304	P10_CD4+CD8+Naive
WDR82	7.63429e-10	0.479657	0.674	0.319	1.02063e-05	GBM.pembro.PBMC	WDR82	0.355	P10_CD4+CD8+Naive
TLE4	3.49088e-09	0.47937	0.73	0.394	4.66696e-05	GBM.pembro.PBMC	TLE4	0.336	P10_CD4+CD8+Naive
TTC14	1.38134e-08	0.476165	0.756	0.415	0.000184671	GBM.pembro.PBMC	TTC14	0.341	P10_CD4+CD8+Naive
EIF1AY	4.12325e-09	0.475471	0.287	0	5.51237e-05	GBM.pembro.PBMC	EIF1AY	0.287	P10_CD4+CD8+Naive
RFC1	7.25404e-09	0.475448	0.67	0.351	9.69793e-05	GBM.pembro.PBMC	RFC1	0.319	P10_CD4+CD8+Naive
UBTF	4.98158e-09	0.4743	0.689	0.33	6.65987e-05	GBM.pembro.PBMC	UBTF	0.359	P10_CD4+CD8+Naive
ZBTB11	1.41581e-08	0.474041	0.428	0.117	0.00018928	GBM.pembro.PBMC	ZBTB11	0.311	P10_CD4+CD8+Naive
STK17B	5.71096e-10	0.472063	0.908	0.628	7.63499e-06	GBM.pembro.PBMC	STK17B	0.28	P10_CD4+CD8+Naive
EPB41	7.9909e-10	0.470789	0.865	0.574	1.0683e-05	GBM.pembro.PBMC	EPB41	0.291	P10_CD4+CD8+Naive
KANSL1	1.95366e-10	0.470657	0.762	0.404	2.61185e-06	GBM.pembro.PBMC	KANSL1	0.358	P10_CD4+CD8+Naive
USP33	1.58163e-08	0.470325	0.529	0.202	0.000211449	GBM.pembro.PBMC	USP33	0.327	P10_CD4+CD8+Naive
SMCHD1	1.58842e-09	0.469763	0.889	0.649	2.12356e-05	GBM.pembro.PBMC	SMCHD1	0.24	P10_CD4+CD8+Naive
SHOC2	5.6048e-10	0.46958	0.516	0.17	7.49305e-06	GBM.pembro.PBMC	SHOC2	0.346	P10_CD4+CD8+Naive
APOL6	1.37669e-07	0.469028	0.693	0.404	0.0018405	GBM.pembro.PBMC	APOL6	0.289	P10_CD4+CD8+Naive
SCAF11	1.50164e-09	0.468867	0.895	0.66	2.00754e-05	GBM.pembro.PBMC	SCAF11	0.235	P10_CD4+CD8+Naive
N4BP2L2	1.19644e-11	0.468104	0.941	0.691	1.59952e-07	GBM.pembro.PBMC	N4BP2L2	0.25	P10_CD4+CD8+Naive
ARFGEF1	3.8946e-08	0.467953	0.572	0.255	0.00052067	GBM.pembro.PBMC	ARFGEF1	0.317	P10_CD4+CD8+Naive
NRDC	1.07639e-08	0.467478	0.672	0.351	0.000143903	GBM.pembro.PBMC	NRDC	0.321	P10_CD4+CD8+Naive
IK	5.83821e-10	0.466822	0.807	0.479	7.8051e-06	GBM.pembro.PBMC	IK	0.328	P10_CD4+CD8+Naive
MSL3	1.06436e-07	0.466599	0.455	0.17	0.00142294	GBM.pembro.PBMC	MSL3	0.285	P10_CD4+CD8+Naive
RAB21	6.67566e-09	0.46585	0.477	0.16	8.92469e-05	GBM.pembro.PBMC	RAB21	0.317	P10_CD4+CD8+Naive
LUC7L3	9.44237e-11	0.464288	0.895	0.617	1.26235e-06	GBM.pembro.PBMC	LUC7L3	0.278	P10_CD4+CD8+Naive
RIF1	3.12549e-09	0.464254	0.535	0.181	4.17846e-05	GBM.pembro.PBMC	RIF1	0.354	P10_CD4+CD8+Naive
CDC42SE2	1.40356e-10	0.463753	0.912	0.596	1.87642e-06	GBM.pembro.PBMC	CDC42SE2	0.316	P10_CD4+CD8+Naive
USF3	7.907e-08	0.46294	0.369	0.074	0.00105709	GBM.pembro.PBMC	USF3	0.295	P10_CD4+CD8+Naive
ZMYM4	3.98185e-09	0.461223	0.35	0.043	5.32334e-05	GBM.pembro.PBMC	ZMYM4	0.307	P10_CD4+CD8+Naive
MINOS1	1.53122e-08	0.458312	0.727	0.383	0.000204708	GBM.pembro.PBMC	MINOS1	0.344	P10_CD4+CD8+Naive
SLFN5	1.27426e-08	0.458302	0.875	0.585	0.000170355	GBM.pembro.PBMC	SLFN5	0.29	P10_CD4+CD8+Naive
RB1CC1	6.68256e-07	0.457025	0.609	0.351	0.00893392	GBM.pembro.PBMC	RB1CC1	0.258	P10_CD4+CD8+Naive
BCL2	1.43053e-08	0.454001	0.74	0.447	0.000191247	GBM.pembro.PBMC	BCL2	0.293	P10_CD4+CD8+Naive
ZC3H13	2.40464e-08	0.452912	0.668	0.351	0.000321477	GBM.pembro.PBMC	ZC3H13	0.317	P10_CD4+CD8+Naive
UBE2M	6.46062e-11	0.450942	0.5	0.106	8.63721e-07	GBM.pembro.PBMC	UBE2M	0.394	P10_CD4+CD8+Naive
MIER1	1.13319e-07	0.450137	0.656	0.33	0.00151496	GBM.pembro.PBMC	MIER1	0.326	P10_CD4+CD8+Naive
SPTY2D1	1.56101e-07	0.449961	0.422	0.138	0.00208692	GBM.pembro.PBMC	SPTY2D1	0.284	P10_CD4+CD8+Naive
IL6ST	6.1969e-06	0.448945	0.527	0.266	0.0828464	GBM.pembro.PBMC	IL6ST	0.261	P10_CD4+CD8+Naive
REL	2.96998e-06	0.448905	0.682	0.426	0.0397056	GBM.pembro.PBMC	REL	0.256	P10_CD4+CD8+Naive
RSF1	3.36229e-07	0.448248	0.732	0.468	0.00449505	GBM.pembro.PBMC	RSF1	0.264	P10_CD4+CD8+Naive
IER5	2.33027e-07	0.447339	0.389	0.106	0.00311533	GBM.pembro.PBMC	IER5	0.283	P10_CD4+CD8+Naive
VAV3	5.37099e-08	0.444404	0.461	0.149	0.000718048	GBM.pembro.PBMC	VAV3	0.312	P10_CD4+CD8+Naive
BTG2	8.90607e-07	0.444402	0.645	0.404	0.0119065	GBM.pembro.PBMC	BTG2	0.241	P10_CD4+CD8+Naive
CTSD	5.18689e-07	0.444374	0.65	0.362	0.00693436	GBM.pembro.PBMC	CTSD	0.288	P10_CD4+CD8+Naive
DHX36	2.87539e-08	0.44399	0.738	0.426	0.000384411	GBM.pembro.PBMC	DHX36	0.312	P10_CD4+CD8+Naive
PPP1R12A	1.75758e-08	0.4429	0.799	0.638	0.000234971	GBM.pembro.PBMC	PPP1R12A	0.161	P10_CD4+CD8+Naive
GNAI2	4.84962e-11	0.441884	0.91	0.596	6.48346e-07	GBM.pembro.PBMC	GNAI2	0.314	P10_CD4+CD8+Naive
PURA	7.75695e-08	0.439936	0.543	0.255	0.00103703	GBM.pembro.PBMC	PURA	0.288	P10_CD4+CD8+Naive
C16orf72	1.65803e-08	0.439243	0.492	0.181	0.000221662	GBM.pembro.PBMC	C16orf72	0.311	P10_CD4+CD8+Naive
PDCD4	3.80734e-07	0.439237	0.762	0.5	0.00509003	GBM.pembro.PBMC	PDCD4	0.262	P10_CD4+CD8+Naive
PTPRA	3.53416e-08	0.439179	0.693	0.362	0.000472482	GBM.pembro.PBMC	PTPRA	0.331	P10_CD4+CD8+Naive
STAG2	1.08645e-09	0.439003	0.732	0.394	1.45247e-05	GBM.pembro.PBMC	STAG2	0.338	P10_CD4+CD8+Naive
RFLNB	3.63667e-07	0.438628	0.398	0.117	0.00486186	GBM.pembro.PBMC	RFLNB	0.281	P10_CD4+CD8+Naive
EIF3J	1.90648e-08	0.438001	0.586	0.245	0.000254877	GBM.pembro.PBMC	EIF3J	0.341	P10_CD4+CD8+Naive
ASXL1	3.42486e-07	0.437801	0.451	0.17	0.00457869	GBM.pembro.PBMC	ASXL1	0.281	P10_CD4+CD8+Naive
PSMA2	3.15331e-10	0.437263	0.508	0.128	4.21566e-06	GBM.pembro.PBMC	PSMA2	0.38	P10_CD4+CD8+Naive
SLCO3A1	3.13964e-07	0.437146	0.406	0.128	0.00419739	GBM.pembro.PBMC	SLCO3A1	0.278	P10_CD4+CD8+Naive
GOLGA8B	1.58639e-07	0.436222	0.441	0.17	0.00212084	GBM.pembro.PBMC	GOLGA8B	0.271	P10_CD4+CD8+Naive
CHD1	1.31124e-08	0.435586	0.656	0.309	0.0001753	GBM.pembro.PBMC	CHD1	0.347	P10_CD4+CD8+Naive
FTX	2.29428e-07	0.43536	0.496	0.202	0.00306722	GBM.pembro.PBMC	FTX	0.294	P10_CD4+CD8+Naive
SYNCRIP	9.58249e-08	0.435356	0.631	0.298	0.00128108	GBM.pembro.PBMC	SYNCRIP	0.333	P10_CD4+CD8+Naive
SESN3	1.77025e-05	0.435231	0.361	0.138	0.236665	GBM.pembro.PBMC	SESN3	0.223	P10_CD4+CD8+Naive
N4BP1	1.5989e-07	0.435208	0.49	0.191	0.00213757	GBM.pembro.PBMC	N4BP1	0.299	P10_CD4+CD8+Naive
UTRN	2.41658e-08	0.435012	0.857	0.585	0.000323073	GBM.pembro.PBMC	UTRN	0.272	P10_CD4+CD8+Naive
ASH1L	4.09062e-09	0.435008	0.734	0.383	5.46875e-05	GBM.pembro.PBMC	ASH1L	0.351	P10_CD4+CD8+Naive
PGP	1.65725e-08	0.434838	0.461	0.16	0.000221558	GBM.pembro.PBMC	PGP	0.301	P10_CD4+CD8+Naive
NDUFC2	1.05815e-08	0.434832	0.662	0.298	0.000141464	GBM.pembro.PBMC	NDUFC2	0.364	P10_CD4+CD8+Naive
HIST1H1C	1.11525e-09	0.434222	0.713	0.309	1.49098e-05	GBM.pembro.PBMC	HIST1H1C	0.404	P10_CD4+CD8+Naive
NAP1L1	8.81516e-10	0.433911	0.904	0.755	1.1785e-05	GBM.pembro.PBMC	NAP1L1	0.149	P10_CD4+CD8+Naive
SPCS3	4.92571e-09	0.433903	0.789	0.394	6.58518e-05	GBM.pembro.PBMC	SPCS3	0.395	P10_CD4+CD8+Naive
RSRP1	3.30437e-11	0.433669	0.918	0.628	4.41761e-07	GBM.pembro.PBMC	RSRP1	0.29	P10_CD4+CD8+Naive
NDUFA13	6.16507e-10	0.433506	0.701	0.319	8.24208e-06	GBM.pembro.PBMC	NDUFA13	0.382	P10_CD4+CD8+Naive
SMARCA2	1.52221e-06	0.429476	0.637	0.362	0.0203504	GBM.pembro.PBMC	SMARCA2	0.275	P10_CD4+CD8+Naive
MIA3	3.11199e-07	0.42929	0.596	0.309	0.00416041	GBM.pembro.PBMC	MIA3	0.287	P10_CD4+CD8+Naive
CNOT6L	5.7076e-07	0.429061	0.707	0.457	0.00763048	GBM.pembro.PBMC	CNOT6L	0.25	P10_CD4+CD8+Naive
DYNC1H1	4.12573e-07	0.428683	0.748	0.468	0.00551569	GBM.pembro.PBMC	DYNC1H1	0.28	P10_CD4+CD8+Naive
DHX9	9.23874e-08	0.428405	0.617	0.309	0.00123513	GBM.pembro.PBMC	DHX9	0.308	P10_CD4+CD8+Naive
MDFIC	1.37182e-07	0.427066	0.598	0.319	0.00183399	GBM.pembro.PBMC	MDFIC	0.279	P10_CD4+CD8+Naive
AMD1	9.57856e-09	0.426725	0.605	0.245	0.000128056	GBM.pembro.PBMC	AMD1	0.36	P10_CD4+CD8+Naive
ITGB1	6.79214e-05	0.426365	0.809	0.628	0.908042	GBM.pembro.PBMC	ITGB1	0.181	P10_CD4+CD8+Naive
PCSK7	2.91814e-07	0.425471	0.84	0.532	0.00390126	GBM.pembro.PBMC	PCSK7	0.308	P10_CD4+CD8+Naive
SYNE1	7.17167e-08	0.425279	0.857	0.596	0.000958781	GBM.pembro.PBMC	SYNE1	0.261	P10_CD4+CD8+Naive
NR4A2	7.62017e-07	0.425271	0.377	0.106	0.0101874	GBM.pembro.PBMC	NR4A2	0.271	P10_CD4+CD8+Naive
ARID4A	2.39927e-06	0.425114	0.559	0.298	0.0320758	GBM.pembro.PBMC	ARID4A	0.261	P10_CD4+CD8+Naive
ZNF33A	7.10521e-07	0.423621	0.514	0.255	0.00949896	GBM.pembro.PBMC	ZNF33A	0.259	P10_CD4+CD8+Naive
THAP12	1.95098e-08	0.422335	0.523	0.191	0.000260826	GBM.pembro.PBMC	THAP12	0.332	P10_CD4+CD8+Naive
TRIM56	1.41518e-05	0.42194	0.605	0.351	0.189196	GBM.pembro.PBMC	TRIM56	0.254	P10_CD4+CD8+Naive
CMIP	2.15313e-08	0.421625	0.445	0.128	0.000287852	GBM.pembro.PBMC	CMIP	0.317	P10_CD4+CD8+Naive
EIF3A	5.86584e-09	0.420902	0.838	0.574	7.84205e-05	GBM.pembro.PBMC	EIF3A	0.264	P10_CD4+CD8+Naive
MALT1	3.12818e-07	0.420408	0.551	0.255	0.00418206	GBM.pembro.PBMC	MALT1	0.296	P10_CD4+CD8+Naive
ATXN7L3B	4.0365e-07	0.419287	0.695	0.404	0.0053964	GBM.pembro.PBMC	ATXN7L3B	0.291	P10_CD4+CD8+Naive
RBM33	5.36221e-08	0.417232	0.627	0.298	0.000716874	GBM.pembro.PBMC	RBM33	0.329	P10_CD4+CD8+Naive
TRIM38	3.83874e-07	0.417071	0.557	0.277	0.00513201	GBM.pembro.PBMC	TRIM38	0.28	P10_CD4+CD8+Naive
KIF2A	4.55237e-07	0.416845	0.775	0.553	0.00608607	GBM.pembro.PBMC	KIF2A	0.222	P10_CD4+CD8+Naive
PKN2	3.67069e-08	0.416749	0.502	0.191	0.000490735	GBM.pembro.PBMC	PKN2	0.311	P10_CD4+CD8+Naive
DNAJB14	1.54025e-08	0.416739	0.664	0.351	0.000205916	GBM.pembro.PBMC	DNAJB14	0.313	P10_CD4+CD8+Naive
WHAMM	1.50802e-06	0.416701	0.48	0.223	0.0201607	GBM.pembro.PBMC	WHAMM	0.257	P10_CD4+CD8+Naive
KAT6B	6.81669e-07	0.415595	0.596	0.309	0.00911324	GBM.pembro.PBMC	KAT6B	0.287	P10_CD4+CD8+Naive
DOCK10	2.45534e-07	0.415561	0.738	0.394	0.00328254	GBM.pembro.PBMC	DOCK10	0.344	P10_CD4+CD8+Naive
CCDC186	1.24188e-06	0.415043	0.523	0.245	0.0166027	GBM.pembro.PBMC	CCDC186	0.278	P10_CD4+CD8+Naive
ZNF91	1.02066e-06	0.413761	0.539	0.266	0.0136452	GBM.pembro.PBMC	ZNF91	0.273	P10_CD4+CD8+Naive
WAC	8.02636e-07	0.413747	0.641	0.351	0.0107304	GBM.pembro.PBMC	WAC	0.29	P10_CD4+CD8+Naive
CHMP4A	1.2822e-09	0.41365	0.68	0.309	1.71417e-05	GBM.pembro.PBMC	CHMP4A	0.371	P10_CD4+CD8+Naive
PPP3CA	1.62564e-05	0.413282	0.482	0.234	0.217332	GBM.pembro.PBMC	PPP3CA	0.248	P10_CD4+CD8+Naive
SETD2	1.84175e-07	0.412963	0.629	0.309	0.00246223	GBM.pembro.PBMC	SETD2	0.32	P10_CD4+CD8+Naive
TNRC6C	2.3219e-06	0.412945	0.52	0.234	0.0310415	GBM.pembro.PBMC	TNRC6C	0.286	P10_CD4+CD8+Naive
N4BP2	3.15749e-06	0.412219	0.406	0.16	0.0422125	GBM.pembro.PBMC	N4BP2	0.246	P10_CD4+CD8+Naive
CHD4	5.48844e-07	0.411482	0.686	0.383	0.0073375	GBM.pembro.PBMC	CHD4	0.303	P10_CD4+CD8+Naive
SUZ12	1.12254e-06	0.411442	0.596	0.298	0.0150072	GBM.pembro.PBMC	SUZ12	0.298	P10_CD4+CD8+Naive
SETX	3.55207e-07	0.41108	0.721	0.426	0.00474876	GBM.pembro.PBMC	SETX	0.295	P10_CD4+CD8+Naive
TRIP12	1.4632e-09	0.410859	0.641	0.309	1.95615e-05	GBM.pembro.PBMC	TRIP12	0.332	P10_CD4+CD8+Naive
SMG1	2.37162e-06	0.410266	0.705	0.426	0.0317062	GBM.pembro.PBMC	SMG1	0.279	P10_CD4+CD8+Naive
PCNX1	4.57106e-07	0.410102	0.541	0.234	0.00611105	GBM.pembro.PBMC	PCNX1	0.307	P10_CD4+CD8+Naive
MXD4	5.97491e-07	0.409985	0.496	0.202	0.00798786	GBM.pembro.PBMC	MXD4	0.294	P10_CD4+CD8+Naive
MPHOSPH9	4.56149e-07	0.409369	0.463	0.17	0.00609825	GBM.pembro.PBMC	MPHOSPH9	0.293	P10_CD4+CD8+Naive
ABHD17A	4.44737e-07	0.408817	0.861	0.617	0.00594568	GBM.pembro.PBMC	ABHD17A	0.244	P10_CD4+CD8+Naive
STK39	1.90234e-06	0.408785	0.34	0.096	0.0254324	GBM.pembro.PBMC	STK39	0.244	P10_CD4+CD8+Naive
U2SURP	9.0619e-08	0.408451	0.809	0.532	0.00121149	GBM.pembro.PBMC	U2SURP	0.277	P10_CD4+CD8+Naive
PTPRC	4.67628e-14	0.408161	0.982	0.936	6.25172e-10	GBM.pembro.PBMC	PTPRC	0.046	P10_CD4+CD8+Naive
OTULIN	1.69482e-07	0.407637	0.4	0.117	0.00226581	GBM.pembro.PBMC	OTULIN	0.283	P10_CD4+CD8+Naive
STXBP3	3.73776e-07	0.407128	0.432	0.16	0.00499701	GBM.pembro.PBMC	STXBP3	0.272	P10_CD4+CD8+Naive
TLK2	1.4012e-06	0.404352	0.447	0.191	0.0187327	GBM.pembro.PBMC	TLK2	0.256	P10_CD4+CD8+Naive
DLG1	3.87798e-06	0.403713	0.408	0.16	0.0518447	GBM.pembro.PBMC	DLG1	0.248	P10_CD4+CD8+Naive
SYNRG	1.06267e-06	0.403297	0.748	0.479	0.0142069	GBM.pembro.PBMC	SYNRG	0.269	P10_CD4+CD8+Naive
CCDC59	4.65053e-06	0.403283	0.621	0.351	0.062173	GBM.pembro.PBMC	CCDC59	0.27	P10_CD4+CD8+Naive
FAM111A	1.5289e-07	0.403149	0.516	0.202	0.00204399	GBM.pembro.PBMC	FAM111A	0.314	P10_CD4+CD8+Naive
DNAJC21	7.03982e-08	0.402668	0.527	0.202	0.000941153	GBM.pembro.PBMC	DNAJC21	0.325	P10_CD4+CD8+Naive
COMMD7	3.9483e-06	0.402475	0.482	0.213	0.0527849	GBM.pembro.PBMC	COMMD7	0.269	P10_CD4+CD8+Naive
CUL3	1.01318e-09	0.40189	0.609	0.234	1.35452e-05	GBM.pembro.PBMC	CUL3	0.375	P10_CD4+CD8+Naive
PAG1	9.419e-06	0.400735	0.68	0.415	0.125923	GBM.pembro.PBMC	PAG1	0.265	P10_CD4+CD8+Naive
ZNF652	1.14552e-06	0.400544	0.512	0.223	0.0153145	GBM.pembro.PBMC	ZNF652	0.289	P10_CD4+CD8+Naive
GIMAP1	4.24329e-07	0.400481	0.744	0.404	0.00567286	GBM.pembro.PBMC	GIMAP1	0.34	P10_CD4+CD8+Naive
THUMPD1	5.8791e-07	0.400085	0.627	0.33	0.00785976	GBM.pembro.PBMC	THUMPD1	0.297	P10_CD4+CD8+Naive
TMEM120B	4.01434e-07	0.399148	0.365	0.096	0.00536677	GBM.pembro.PBMC	TMEM120B	0.269	P10_CD4+CD8+Naive
FAM208A	4.4635e-06	0.398521	0.525	0.255	0.0596726	GBM.pembro.PBMC	FAM208A	0.27	P10_CD4+CD8+Naive
STK17A	3.75787e-07	0.398233	0.859	0.649	0.0050239	GBM.pembro.PBMC	STK17A	0.21	P10_CD4+CD8+Naive
DDX3X	5.06749e-10	0.397436	0.867	0.564	6.77473e-06	GBM.pembro.PBMC	DDX3X	0.303	P10_CD4+CD8+Naive
CHD2	1.62138e-07	0.396782	0.648	0.34	0.00216762	GBM.pembro.PBMC	CHD2	0.308	P10_CD4+CD8+Naive
RBM25	7.92263e-09	0.395403	0.891	0.617	0.000105918	GBM.pembro.PBMC	RBM25	0.274	P10_CD4+CD8+Naive
ZNF644	2.95423e-07	0.394871	0.547	0.234	0.0039495	GBM.pembro.PBMC	ZNF644	0.313	P10_CD4+CD8+Naive
DYRK2	2.5269e-07	0.393914	0.539	0.223	0.00337821	GBM.pembro.PBMC	DYRK2	0.316	P10_CD4+CD8+Naive
PACS1	1.32979e-07	0.393713	0.584	0.298	0.00177779	GBM.pembro.PBMC	PACS1	0.286	P10_CD4+CD8+Naive
TLK1	1.54871e-06	0.393535	0.592	0.309	0.0207046	GBM.pembro.PBMC	TLK1	0.283	P10_CD4+CD8+Naive
SON	2.03736e-13	0.393492	0.969	0.883	2.72375e-09	GBM.pembro.PBMC	SON	0.086	P10_CD4+CD8+Naive
KTN1	6.2094e-07	0.393424	0.809	0.521	0.00830134	GBM.pembro.PBMC	KTN1	0.288	P10_CD4+CD8+Naive
CDYL	1.68243e-06	0.392755	0.34	0.106	0.0224925	GBM.pembro.PBMC	CDYL	0.234	P10_CD4+CD8+Naive
YIPF4	1.72727e-05	0.391935	0.555	0.298	0.230919	GBM.pembro.PBMC	YIPF4	0.257	P10_CD4+CD8+Naive
DDX18	2.13362e-06	0.391624	0.811	0.606	0.0285244	GBM.pembro.PBMC	DDX18	0.205	P10_CD4+CD8+Naive
RSRC2	6.29379e-07	0.391557	0.713	0.436	0.00841417	GBM.pembro.PBMC	RSRC2	0.277	P10_CD4+CD8+Naive
TPT1	4.22801e-12	0.39015	0.996	1	5.65243e-08	GBM.pembro.PBMC	TPT1	-0.004	P10_CD4+CD8+Naive
NSMCE3	1.05354e-07	0.390058	0.578	0.266	0.00140848	GBM.pembro.PBMC	NSMCE3	0.312	P10_CD4+CD8+Naive
PICALM	1.62602e-06	0.389863	0.4	0.138	0.0217382	GBM.pembro.PBMC	PICALM	0.262	P10_CD4+CD8+Naive
NECAP1	1.08707e-05	0.389515	0.4	0.16	0.14533	GBM.pembro.PBMC	NECAP1	0.24	P10_CD4+CD8+Naive
SRSF5	4.8316e-12	0.389183	0.973	0.904	6.45936e-08	GBM.pembro.PBMC	SRSF5	0.069	P10_CD4+CD8+Naive
ZC3H18	1.2721e-06	0.388595	0.469	0.191	0.0170067	GBM.pembro.PBMC	ZC3H18	0.278	P10_CD4+CD8+Naive
FYN	3.62934e-07	0.388369	0.861	0.574	0.00485207	GBM.pembro.PBMC	FYN	0.287	P10_CD4+CD8+Naive
IKZF3	1.48706e-07	0.388076	0.746	0.479	0.00198805	GBM.pembro.PBMC	IKZF3	0.267	P10_CD4+CD8+Naive
TACC1	1.76444e-06	0.387732	0.551	0.277	0.0235888	GBM.pembro.PBMC	TACC1	0.274	P10_CD4+CD8+Naive
TTN	0.000106727	0.386728	0.26	0.074	1	GBM.pembro.PBMC	TTN	0.186	P10_CD4+CD8+Naive
CD46	3.34574e-08	0.386649	0.705	0.404	0.000447292	GBM.pembro.PBMC	CD46	0.301	P10_CD4+CD8+Naive
CRCP	6.71932e-07	0.386048	0.443	0.16	0.00898306	GBM.pembro.PBMC	CRCP	0.283	P10_CD4+CD8+Naive
AHCTF1	2.20918e-06	0.385918	0.408	0.16	0.0295346	GBM.pembro.PBMC	AHCTF1	0.248	P10_CD4+CD8+Naive
KIDINS220	6.69541e-06	0.385903	0.518	0.255	0.0895109	GBM.pembro.PBMC	KIDINS220	0.263	P10_CD4+CD8+Naive
PDCD7	4.27635e-08	0.385709	0.477	0.16	0.000571706	GBM.pembro.PBMC	PDCD7	0.317	P10_CD4+CD8+Naive
DOCK2	1.26491e-06	0.385233	0.613	0.34	0.0169106	GBM.pembro.PBMC	DOCK2	0.273	P10_CD4+CD8+Naive
FAM76B	2.2009e-06	0.385002	0.412	0.17	0.0294239	GBM.pembro.PBMC	FAM76B	0.242	P10_CD4+CD8+Naive
DDX5	5.57558e-16	0.384426	0.99	0.989	7.45399e-12	GBM.pembro.PBMC	DDX5	0.001	P10_CD4+CD8+Naive
SMC3	4.84167e-08	0.383808	0.709	0.372	0.000647283	GBM.pembro.PBMC	SMC3	0.337	P10_CD4+CD8+Naive
GATAD2A	6.07924e-07	0.383561	0.566	0.277	0.00812734	GBM.pembro.PBMC	GATAD2A	0.289	P10_CD4+CD8+Naive
ZNF708	5.89812e-06	0.383469	0.367	0.128	0.0788519	GBM.pembro.PBMC	ZNF708	0.239	P10_CD4+CD8+Naive
KMT2C	5.86815e-06	0.383037	0.686	0.457	0.0784513	GBM.pembro.PBMC	KMT2C	0.229	P10_CD4+CD8+Naive
FAM89B	9.80147e-08	0.382849	0.494	0.191	0.00131036	GBM.pembro.PBMC	FAM89B	0.303	P10_CD4+CD8+Naive
PPP2R5E	3.19493e-06	0.382781	0.531	0.266	0.0427131	GBM.pembro.PBMC	PPP2R5E	0.265	P10_CD4+CD8+Naive
CSNK2B	3.48325e-08	0.382776	0.561	0.234	0.000465676	GBM.pembro.PBMC	CSNK2B	0.327	P10_CD4+CD8+Naive
EPM2AIP1	7.45352e-06	0.381365	0.408	0.17	0.0996462	GBM.pembro.PBMC	EPM2AIP1	0.238	P10_CD4+CD8+Naive
BRI3	1.00502e-08	0.380801	0.453	0.149	0.000134361	GBM.pembro.PBMC	BRI3	0.304	P10_CD4+CD8+Naive
CDC5L	3.20554e-06	0.378804	0.488	0.234	0.0428548	GBM.pembro.PBMC	CDC5L	0.254	P10_CD4+CD8+Naive
BRAF	3.71376e-06	0.378764	0.465	0.191	0.0496493	GBM.pembro.PBMC	BRAF	0.274	P10_CD4+CD8+Naive
PYHIN1	1.47486e-05	0.378547	0.732	0.457	0.197174	GBM.pembro.PBMC	PYHIN1	0.275	P10_CD4+CD8+Naive
SPTBN1	4.86304e-06	0.378517	0.609	0.34	0.0650139	GBM.pembro.PBMC	SPTBN1	0.269	P10_CD4+CD8+Naive
RPAP2	5.66861e-05	0.378329	0.48	0.255	0.757837	GBM.pembro.PBMC	RPAP2	0.225	P10_CD4+CD8+Naive
SSBP3	1.60388e-05	0.378316	0.488	0.245	0.214423	GBM.pembro.PBMC	SSBP3	0.243	P10_CD4+CD8+Naive
FAM208B	1.36351e-05	0.378144	0.412	0.181	0.182287	GBM.pembro.PBMC	FAM208B	0.231	P10_CD4+CD8+Naive
CREBRF	5.95165e-07	0.378071	0.68	0.34	0.00795675	GBM.pembro.PBMC	CREBRF	0.34	P10_CD4+CD8+Naive
GTF2I	1.05367e-06	0.37749	0.699	0.394	0.0140864	GBM.pembro.PBMC	GTF2I	0.305	P10_CD4+CD8+Naive
QKI	9.11963e-09	0.376813	0.551	0.213	0.00012192	GBM.pembro.PBMC	QKI	0.338	P10_CD4+CD8+Naive
ZNF292	5.95274e-06	0.376636	0.725	0.447	0.0795822	GBM.pembro.PBMC	ZNF292	0.278	P10_CD4+CD8+Naive
SCFD1	1.43777e-05	0.376181	0.459	0.223	0.192216	GBM.pembro.PBMC	SCFD1	0.236	P10_CD4+CD8+Naive
GBP4	1.91264e-07	0.375951	0.531	0.202	0.00255701	GBM.pembro.PBMC	GBP4	0.329	P10_CD4+CD8+Naive
PAXBP1	5.00802e-07	0.375135	0.465	0.191	0.00669523	GBM.pembro.PBMC	PAXBP1	0.274	P10_CD4+CD8+Naive
OXNAD1	6.79192e-05	0.374441	0.65	0.415	0.908012	GBM.pembro.PBMC	OXNAD1	0.235	P10_CD4+CD8+Naive
ANKRD44	7.39942e-07	0.374385	0.852	0.596	0.00989229	GBM.pembro.PBMC	ANKRD44	0.256	P10_CD4+CD8+Naive
SLC39A10	5.43253e-06	0.37361	0.416	0.16	0.0726275	GBM.pembro.PBMC	SLC39A10	0.256	P10_CD4+CD8+Naive
SRSF6	7.75217e-06	0.373144	0.459	0.213	0.103639	GBM.pembro.PBMC	SRSF6	0.246	P10_CD4+CD8+Naive
CSGALNACT2	2.41743e-06	0.373124	0.447	0.181	0.0323186	GBM.pembro.PBMC	CSGALNACT2	0.266	P10_CD4+CD8+Naive
NCK2	2.52774e-08	0.37282	0.549	0.223	0.000337934	GBM.pembro.PBMC	NCK2	0.326	P10_CD4+CD8+Naive
THOC1	4.01356e-06	0.372711	0.33	0.096	0.0536573	GBM.pembro.PBMC	THOC1	0.234	P10_CD4+CD8+Naive
ZNF207	1.15241e-06	0.371785	0.82	0.574	0.0154065	GBM.pembro.PBMC	ZNF207	0.246	P10_CD4+CD8+Naive
CSNK1G3	1.44777e-06	0.371433	0.445	0.17	0.0193552	GBM.pembro.PBMC	CSNK1G3	0.275	P10_CD4+CD8+Naive
GRK2	1.38305e-06	0.371136	0.6	0.298	0.01849	GBM.pembro.PBMC	GRK2	0.302	P10_CD4+CD8+Naive
DNAJA1	1.19629e-06	0.370582	0.693	0.415	0.0159932	GBM.pembro.PBMC	DNAJA1	0.278	P10_CD4+CD8+Naive
SPATA13	5.17574e-06	0.369935	0.488	0.223	0.0691945	GBM.pembro.PBMC	SPATA13	0.265	P10_CD4+CD8+Naive
DNM1L	6.18869e-07	0.369933	0.471	0.17	0.00827366	GBM.pembro.PBMC	DNM1L	0.301	P10_CD4+CD8+Naive
EVI2A	0.000144176	0.369763	0.357	0.16	1	GBM.pembro.PBMC	EVI2A	0.197	P10_CD4+CD8+Naive
PRPF40A	2.87523e-06	0.369584	0.734	0.479	0.038439	GBM.pembro.PBMC	PRPF40A	0.255	P10_CD4+CD8+Naive
SFI1	1.75159e-06	0.369517	0.398	0.138	0.023417	GBM.pembro.PBMC	SFI1	0.26	P10_CD4+CD8+Naive
TERF2	1.76994e-06	0.369506	0.285	0.053	0.0236623	GBM.pembro.PBMC	TERF2	0.232	P10_CD4+CD8+Naive
NDUFA11	2.26257e-06	0.369362	0.705	0.426	0.0302482	GBM.pembro.PBMC	NDUFA11	0.279	P10_CD4+CD8+Naive
TMOD3	2.54274e-06	0.369225	0.695	0.415	0.0339939	GBM.pembro.PBMC	TMOD3	0.28	P10_CD4+CD8+Naive
MLLT6	9.42783e-07	0.368058	0.701	0.436	0.0126041	GBM.pembro.PBMC	MLLT6	0.265	P10_CD4+CD8+Naive
ZNF394	7.88893e-07	0.36748	0.6	0.277	0.0105467	GBM.pembro.PBMC	ZNF394	0.323	P10_CD4+CD8+Naive
TBL1XR1	2.12679e-07	0.366797	0.506	0.191	0.00284331	GBM.pembro.PBMC	TBL1XR1	0.315	P10_CD4+CD8+Naive
LNPEP	4.95677e-06	0.366262	0.787	0.532	0.066267	GBM.pembro.PBMC	LNPEP	0.255	P10_CD4+CD8+Naive
PRRC2C	1.13619e-09	0.36609	0.959	0.84	1.51897e-05	GBM.pembro.PBMC	PRRC2C	0.119	P10_CD4+CD8+Naive
PRKCA	1.52797e-08	0.365994	0.492	0.16	0.000204274	GBM.pembro.PBMC	PRKCA	0.332	P10_CD4+CD8+Naive
CASP8AP2	6.24213e-06	0.365509	0.443	0.191	0.0834511	GBM.pembro.PBMC	CASP8AP2	0.252	P10_CD4+CD8+Naive
ZMYM2	9.02647e-06	0.365414	0.488	0.234	0.120675	GBM.pembro.PBMC	ZMYM2	0.254	P10_CD4+CD8+Naive
PTCD3	4.47921e-08	0.365345	0.428	0.117	0.000598825	GBM.pembro.PBMC	PTCD3	0.311	P10_CD4+CD8+Naive
PPP1CB	1.27118e-07	0.364681	0.611	0.287	0.00169944	GBM.pembro.PBMC	PPP1CB	0.324	P10_CD4+CD8+Naive
CCNY	1.83467e-06	0.364397	0.355	0.106	0.0245277	GBM.pembro.PBMC	CCNY	0.249	P10_CD4+CD8+Naive
YTHDC1	1.30092e-07	0.364364	0.773	0.468	0.0017392	GBM.pembro.PBMC	YTHDC1	0.305	P10_CD4+CD8+Naive
CEBPZ	6.31084e-08	0.364067	0.639	0.309	0.000843697	GBM.pembro.PBMC	CEBPZ	0.33	P10_CD4+CD8+Naive
NUCKS1	8.9192e-07	0.36386	0.883	0.638	0.0119241	GBM.pembro.PBMC	NUCKS1	0.245	P10_CD4+CD8+Naive
PLCG2	7.04035e-08	0.363248	0.613	0.309	0.000941224	GBM.pembro.PBMC	PLCG2	0.304	P10_CD4+CD8+Naive
ELK3	2.37849e-05	0.362689	0.361	0.138	0.31798	GBM.pembro.PBMC	ELK3	0.223	P10_CD4+CD8+Naive
NCOA1	1.25999e-06	0.361396	0.535	0.255	0.0168448	GBM.pembro.PBMC	NCOA1	0.28	P10_CD4+CD8+Naive
ASCC3	2.81578e-06	0.360654	0.439	0.17	0.0376442	GBM.pembro.PBMC	ASCC3	0.269	P10_CD4+CD8+Naive
RNF169	3.72485e-07	0.360345	0.434	0.138	0.00497976	GBM.pembro.PBMC	RNF169	0.296	P10_CD4+CD8+Naive
SOS2	8.06211e-06	0.360063	0.4	0.149	0.107782	GBM.pembro.PBMC	SOS2	0.251	P10_CD4+CD8+Naive
SGTB	1.09094e-05	0.360063	0.34	0.117	0.145848	GBM.pembro.PBMC	SGTB	0.223	P10_CD4+CD8+Naive
XPO1	4.2869e-06	0.359872	0.609	0.298	0.0573115	GBM.pembro.PBMC	XPO1	0.311	P10_CD4+CD8+Naive
ARID2	5.16283e-06	0.35985	0.412	0.16	0.0690219	GBM.pembro.PBMC	ARID2	0.252	P10_CD4+CD8+Naive
BRD1	1.95477e-06	0.359664	0.453	0.191	0.0261334	GBM.pembro.PBMC	BRD1	0.262	P10_CD4+CD8+Naive
MAP2K2	2.46078e-09	0.358794	0.668	0.287	3.28982e-05	GBM.pembro.PBMC	MAP2K2	0.381	P10_CD4+CD8+Naive
TOP2B	2.22417e-08	0.357954	0.66	0.277	0.00029735	GBM.pembro.PBMC	TOP2B	0.383	P10_CD4+CD8+Naive
MBP	1.38207e-06	0.356958	0.9	0.67	0.0184769	GBM.pembro.PBMC	MBP	0.23	P10_CD4+CD8+Naive
XRN1	1.42745e-05	0.35667	0.664	0.404	0.190836	GBM.pembro.PBMC	XRN1	0.26	P10_CD4+CD8+Naive
APC	5.08867e-05	0.356581	0.43	0.213	0.680304	GBM.pembro.PBMC	APC	0.217	P10_CD4+CD8+Naive
CREBBP	4.92401e-05	0.356548	0.5	0.277	0.658291	GBM.pembro.PBMC	CREBBP	0.223	P10_CD4+CD8+Naive
GTF2A1	1.08368e-06	0.356541	0.287	0.053	0.0144878	GBM.pembro.PBMC	GTF2A1	0.234	P10_CD4+CD8+Naive
ZNF451	9.01579e-08	0.356036	0.49	0.181	0.00120532	GBM.pembro.PBMC	ZNF451	0.309	P10_CD4+CD8+Naive
SLC38A1	1.70529e-05	0.355822	0.807	0.574	0.22798	GBM.pembro.PBMC	SLC38A1	0.233	P10_CD4+CD8+Naive
NSD3	4.71064e-07	0.355769	0.84	0.585	0.00629765	GBM.pembro.PBMC	NSD3	0.255	P10_CD4+CD8+Naive
MXI1	2.9315e-06	0.35511	0.281	0.053	0.0391912	GBM.pembro.PBMC	MXI1	0.228	P10_CD4+CD8+Naive
ROCK1	2.75059e-07	0.35486	0.852	0.596	0.00367727	GBM.pembro.PBMC	ROCK1	0.256	P10_CD4+CD8+Naive
CYLD	7.89693e-08	0.354657	0.816	0.564	0.00105574	GBM.pembro.PBMC	CYLD	0.252	P10_CD4+CD8+Naive
RNF157	2.65843e-05	0.353936	0.326	0.106	0.355406	GBM.pembro.PBMC	RNF157	0.22	P10_CD4+CD8+Naive
ZNF37A	5.59754e-06	0.353558	0.328	0.106	0.0748335	GBM.pembro.PBMC	ZNF37A	0.222	P10_CD4+CD8+Naive
PDS5B	1.88642e-06	0.352418	0.398	0.128	0.0252196	GBM.pembro.PBMC	PDS5B	0.27	P10_CD4+CD8+Naive
SRSF10	1.34521e-05	0.352241	0.748	0.543	0.179841	GBM.pembro.PBMC	SRSF10	0.205	P10_CD4+CD8+Naive
TUT7	6.4768e-06	0.352206	0.49	0.223	0.0865884	GBM.pembro.PBMC	TUT7	0.267	P10_CD4+CD8+Naive
DYNLL2	6.21342e-09	0.350518	0.467	0.138	8.30673e-05	GBM.pembro.PBMC	DYNLL2	0.329	P10_CD4+CD8+Naive
HECA	4.17332e-05	0.350474	0.512	0.266	0.557931	GBM.pembro.PBMC	HECA	0.246	P10_CD4+CD8+Naive
CCDC88C	2.27736e-06	0.350433	0.734	0.426	0.030446	GBM.pembro.PBMC	CCDC88C	0.308	P10_CD4+CD8+Naive
ANKRD36B	6.72339e-06	0.349596	0.309	0.085	0.089885	GBM.pembro.PBMC	ANKRD36B	0.224	P10_CD4+CD8+Naive
CHD8	2.12312e-06	0.348859	0.525	0.223	0.028384	GBM.pembro.PBMC	CHD8	0.302	P10_CD4+CD8+Naive
INTS6	4.54212e-06	0.34825	0.496	0.234	0.0607235	GBM.pembro.PBMC	INTS6	0.262	P10_CD4+CD8+Naive
HP1BP3	1.09544e-06	0.347612	0.889	0.702	0.0146449	GBM.pembro.PBMC	HP1BP3	0.187	P10_CD4+CD8+Naive
SYS1	5.72062e-06	0.347592	0.33	0.096	0.0764789	GBM.pembro.PBMC	SYS1	0.234	P10_CD4+CD8+Naive
ZNF518A	0.000185761	0.347325	0.318	0.138	1	GBM.pembro.PBMC	ZNF518A	0.18	P10_CD4+CD8+Naive
SNHG7	4.52058e-06	0.346807	0.57	0.287	0.0604357	GBM.pembro.PBMC	SNHG7	0.283	P10_CD4+CD8+Naive
USP16	1.38555e-05	0.346734	0.664	0.404	0.185235	GBM.pembro.PBMC	USP16	0.26	P10_CD4+CD8+Naive
TNFSF12	1.68615e-06	0.346452	0.307	0.064	0.0225422	GBM.pembro.PBMC	TNFSF12	0.243	P10_CD4+CD8+Naive
PIBF1	3.38262e-05	0.346445	0.447	0.213	0.452223	GBM.pembro.PBMC	PIBF1	0.234	P10_CD4+CD8+Naive
PTPN12	7.68439e-05	0.346375	0.518	0.277	1	GBM.pembro.PBMC	PTPN12	0.241	P10_CD4+CD8+Naive
ZNF224	6.92798e-07	0.346206	0.342	0.085	0.00926201	GBM.pembro.PBMC	ZNF224	0.257	P10_CD4+CD8+Naive
PAFAH1B1	2.41501e-05	0.345567	0.666	0.404	0.322862	GBM.pembro.PBMC	PAFAH1B1	0.262	P10_CD4+CD8+Naive
ZNF331	3.85444e-05	0.345347	0.387	0.17	0.5153	GBM.pembro.PBMC	ZNF331	0.217	P10_CD4+CD8+Naive
BAG5	5.75654e-07	0.345271	0.436	0.181	0.00769591	GBM.pembro.PBMC	BAG5	0.255	P10_CD4+CD8+Naive
LPGAT1	1.37039e-05	0.345217	0.508	0.245	0.183207	GBM.pembro.PBMC	LPGAT1	0.263	P10_CD4+CD8+Naive
MPHOSPH8	3.37173e-07	0.344679	0.887	0.638	0.00450767	GBM.pembro.PBMC	MPHOSPH8	0.249	P10_CD4+CD8+Naive
FAM133B	4.32315e-07	0.343665	0.758	0.447	0.00577962	GBM.pembro.PBMC	FAM133B	0.311	P10_CD4+CD8+Naive
ZC3H7A	2.6665e-06	0.343085	0.488	0.202	0.0356485	GBM.pembro.PBMC	ZC3H7A	0.286	P10_CD4+CD8+Naive
GPBP1	1.49942e-06	0.343048	0.809	0.511	0.0200457	GBM.pembro.PBMC	GPBP1	0.298	P10_CD4+CD8+Naive
PPP1R15A	9.27391e-05	0.342809	0.566	0.34	1	GBM.pembro.PBMC	PPP1R15A	0.226	P10_CD4+CD8+Naive
CWC22	5.06456e-06	0.342748	0.361	0.117	0.0677081	GBM.pembro.PBMC	CWC22	0.244	P10_CD4+CD8+Naive
OGA	6.83494e-06	0.342173	0.781	0.5	0.0913763	GBM.pembro.PBMC	OGA	0.281	P10_CD4+CD8+Naive
FUS	8.37474e-07	0.342084	0.934	0.766	0.0111962	GBM.pembro.PBMC	FUS	0.168	P10_CD4+CD8+Naive
SPAG9	9.78781e-06	0.342059	0.457	0.213	0.130853	GBM.pembro.PBMC	SPAG9	0.244	P10_CD4+CD8+Naive
EMB	5.83182e-07	0.341752	0.822	0.574	0.00779656	GBM.pembro.PBMC	EMB	0.248	P10_CD4+CD8+Naive
SBDS	1.29265e-06	0.341524	0.566	0.277	0.0172815	GBM.pembro.PBMC	SBDS	0.289	P10_CD4+CD8+Naive
SRRM1	1.68874e-06	0.341232	0.926	0.766	0.0225767	GBM.pembro.PBMC	SRRM1	0.16	P10_CD4+CD8+Naive
PHACTR2	0.00036792	0.340817	0.424	0.213	1	GBM.pembro.PBMC	PHACTR2	0.211	P10_CD4+CD8+Naive
THRAP3	6.25543e-08	0.340769	0.807	0.585	0.000836289	GBM.pembro.PBMC	THRAP3	0.222	P10_CD4+CD8+Naive
UGP2	1.53363e-05	0.340586	0.668	0.394	0.205031	GBM.pembro.PBMC	UGP2	0.274	P10_CD4+CD8+Naive
UBE2S	1.43274e-05	0.340584	0.328	0.096	0.191543	GBM.pembro.PBMC	UBE2S	0.232	P10_CD4+CD8+Naive
PHIP	5.96904e-05	0.340387	0.609	0.351	0.798001	GBM.pembro.PBMC	PHIP	0.258	P10_CD4+CD8+Naive
TTC3	2.35452e-06	0.339923	0.805	0.511	0.0314776	GBM.pembro.PBMC	TTC3	0.294	P10_CD4+CD8+Naive
CBX4	9.37509e-06	0.339861	0.344	0.117	0.125336	GBM.pembro.PBMC	CBX4	0.227	P10_CD4+CD8+Naive
CCDC6	1.40309e-06	0.339565	0.281	0.043	0.0187578	GBM.pembro.PBMC	CCDC6	0.238	P10_CD4+CD8+Naive
NAP1L4	1.13662e-06	0.339078	0.787	0.479	0.0151955	GBM.pembro.PBMC	NAP1L4	0.308	P10_CD4+CD8+Naive
NCL	4.6084e-08	0.338762	0.955	0.83	0.000616097	GBM.pembro.PBMC	NCL	0.125	P10_CD4+CD8+Naive
PHACTR4	1.24728e-07	0.337526	0.471	0.16	0.00166749	GBM.pembro.PBMC	PHACTR4	0.311	P10_CD4+CD8+Naive
CAST	5.31486e-06	0.337412	0.908	0.734	0.0710543	GBM.pembro.PBMC	CAST	0.174	P10_CD4+CD8+Naive
TSPYL2	1.81038e-06	0.337232	0.557	0.255	0.024203	GBM.pembro.PBMC	TSPYL2	0.302	P10_CD4+CD8+Naive
EZH1	8.72536e-07	0.337058	0.365	0.096	0.0116649	GBM.pembro.PBMC	EZH1	0.269	P10_CD4+CD8+Naive
DENR	1.40692e-05	0.336799	0.582	0.319	0.188091	GBM.pembro.PBMC	DENR	0.263	P10_CD4+CD8+Naive
ACIN1	7.89179e-05	0.336669	0.617	0.394	1	GBM.pembro.PBMC	ACIN1	0.223	P10_CD4+CD8+Naive
CHURC1	2.53456e-06	0.336496	0.725	0.468	0.0338845	GBM.pembro.PBMC	CHURC1	0.257	P10_CD4+CD8+Naive
CAB39	1.14197e-05	0.335885	0.475	0.234	0.15267	GBM.pembro.PBMC	CAB39	0.241	P10_CD4+CD8+Naive
SF3B1	2.47499e-07	0.335631	0.893	0.702	0.00330882	GBM.pembro.PBMC	SF3B1	0.191	P10_CD4+CD8+Naive
HIVEP2	8.33014e-05	0.33538	0.381	0.181	1	GBM.pembro.PBMC	HIVEP2	0.2	P10_CD4+CD8+Naive
SNF8	1.28977e-05	0.334074	0.543	0.287	0.172429	GBM.pembro.PBMC	SNF8	0.256	P10_CD4+CD8+Naive
CDK11B	3.49927e-06	0.333557	0.42	0.16	0.0467818	GBM.pembro.PBMC	CDK11B	0.26	P10_CD4+CD8+Naive
KPNA4	5.59227e-06	0.333473	0.533	0.255	0.0747631	GBM.pembro.PBMC	KPNA4	0.278	P10_CD4+CD8+Naive
SRSF7	5.36441e-06	0.333408	0.902	0.67	0.0717169	GBM.pembro.PBMC	SRSF7	0.232	P10_CD4+CD8+Naive
2021-09-07	2.21725e-09	0.332365	0.965	0.83	2.96425e-05	GBM.pembro.PBMC	2021-09-07	0.135	P10_CD4+CD8+Naive
ARID4B	9.06874e-07	0.331938	0.848	0.596	0.012124	GBM.pembro.PBMC	ARID4B	0.252	P10_CD4+CD8+Naive
PMF1	2.05247e-05	0.331757	0.336	0.128	0.274394	GBM.pembro.PBMC	PMF1	0.208	P10_CD4+CD8+Naive
UBE2Q1	3.3163e-07	0.331063	0.473	0.181	0.00443356	GBM.pembro.PBMC	UBE2Q1	0.292	P10_CD4+CD8+Naive
SORL1	4.38045e-06	0.330857	0.809	0.543	0.0585623	GBM.pembro.PBMC	SORL1	0.266	P10_CD4+CD8+Naive
CBL	5.85355e-05	0.330418	0.389	0.17	0.78256	GBM.pembro.PBMC	CBL	0.219	P10_CD4+CD8+Naive
IRS2	4.34704e-05	0.329986	0.26	0.074	0.581156	GBM.pembro.PBMC	IRS2	0.186	P10_CD4+CD8+Naive
AKAP8	4.43317e-06	0.329726	0.289	0.064	0.0592671	GBM.pembro.PBMC	AKAP8	0.225	P10_CD4+CD8+Naive
SREK1	0.000120466	0.329014	0.549	0.319	1	GBM.pembro.PBMC	SREK1	0.23	P10_CD4+CD8+Naive
KIAA2026	1.41915e-07	0.328663	0.553	0.234	0.00189726	GBM.pembro.PBMC	KIAA2026	0.319	P10_CD4+CD8+Naive
HIPK1	2.24172e-06	0.328575	0.525	0.245	0.0299696	GBM.pembro.PBMC	HIPK1	0.28	P10_CD4+CD8+Naive
RPAP3	0.00030508	0.328503	0.314	0.138	1	GBM.pembro.PBMC	RPAP3	0.176	P10_CD4+CD8+Naive
THOC2	9.63992e-05	0.328451	0.637	0.404	1	GBM.pembro.PBMC	THOC2	0.233	P10_CD4+CD8+Naive
KATNBL1	3.71817e-05	0.32837	0.406	0.181	0.497082	GBM.pembro.PBMC	KATNBL1	0.225	P10_CD4+CD8+Naive
KRR1	5.76787e-05	0.328023	0.584	0.34	0.771106	GBM.pembro.PBMC	KRR1	0.244	P10_CD4+CD8+Naive
FUBP1	6.60333e-06	0.327898	0.627	0.351	0.0882799	GBM.pembro.PBMC	FUBP1	0.276	P10_CD4+CD8+Naive
DDHD1	1.17813e-05	0.327255	0.561	0.287	0.157505	GBM.pembro.PBMC	DDHD1	0.274	P10_CD4+CD8+Naive
MIS18BP1	2.06406e-06	0.327143	0.531	0.245	0.0275944	GBM.pembro.PBMC	MIS18BP1	0.286	P10_CD4+CD8+Naive
CBX5	0.000322142	0.32713	0.467	0.255	1	GBM.pembro.PBMC	CBX5	0.212	P10_CD4+CD8+Naive
DDX52	0.000117388	0.327038	0.389	0.181	1	GBM.pembro.PBMC	DDX52	0.208	P10_CD4+CD8+Naive
TTC37	2.67786e-05	0.326962	0.473	0.234	0.358003	GBM.pembro.PBMC	TTC37	0.239	P10_CD4+CD8+Naive
MED13	1.16968e-05	0.326873	0.447	0.191	0.156375	GBM.pembro.PBMC	MED13	0.256	P10_CD4+CD8+Naive
TRAF5	1.08643e-05	0.326682	0.385	0.138	0.145245	GBM.pembro.PBMC	TRAF5	0.247	P10_CD4+CD8+Naive
MAF	0.00107403	0.324322	0.393	0.213	1	GBM.pembro.PBMC	MAF	0.18	P10_CD4+CD8+Naive
STIM2	2.16579e-06	0.323858	0.518	0.245	0.0289544	GBM.pembro.PBMC	STIM2	0.273	P10_CD4+CD8+Naive
PHF10	8.92467e-06	0.323528	0.359	0.128	0.119314	GBM.pembro.PBMC	PHF10	0.231	P10_CD4+CD8+Naive
FMR1	6.95437e-05	0.323449	0.373	0.17	0.92973	GBM.pembro.PBMC	FMR1	0.203	P10_CD4+CD8+Naive
RETREG1	2.19358e-05	0.322801	0.283	0.074	0.293259	GBM.pembro.PBMC	RETREG1	0.209	P10_CD4+CD8+Naive
SRM	2.11081e-07	0.322539	0.406	0.117	0.00282194	GBM.pembro.PBMC	SRM	0.289	P10_CD4+CD8+Naive
SVIP	2.13872e-05	0.322309	0.553	0.298	0.285926	GBM.pembro.PBMC	SVIP	0.255	P10_CD4+CD8+Naive
RBM23	8.20218e-06	0.322038	0.51	0.255	0.109655	GBM.pembro.PBMC	RBM23	0.255	P10_CD4+CD8+Naive
IFITM1	2.12144e-38	2.68863	0.904	0.379	2.83615e-34	GBM.rec.PBMC	IFITM1	0.525	P10_CD4+CD8+Naive
IFITM3	2.51154e-41	1.57947	0.771	0.158	3.35767e-37	GBM.rec.PBMC	IFITM3	0.613	P10_CD4+CD8+Naive
GABARAP	1.63785e-41	1.48279	0.747	0.15	2.18964e-37	GBM.rec.PBMC	GABARAP	0.597	P10_CD4+CD8+Naive
S100A9	1.11117e-06	1.36493	0.506	0.277	0.0148553	GBM.rec.PBMC	S100A9	0.229	P10_CD4+CD8+Naive
ALDOA	6.45725e-33	1.2921	0.639	0.136	8.6327e-29	GBM.rec.PBMC	ALDOA	0.503	P10_CD4+CD8+Naive
ZFP36	1.02007e-15	1.26462	0.819	0.617	1.36374e-11	GBM.rec.PBMC	ZFP36	0.202	P10_CD4+CD8+Naive
MIF	9.41899e-25	1.2386	0.867	0.531	1.25922e-20	GBM.rec.PBMC	MIF	0.336	P10_CD4+CD8+Naive
PTPRCAP	6.56593e-58	1.1507	0.494	0.002	8.778e-54	GBM.rec.PBMC	PTPRCAP	0.492	P10_CD4+CD8+Naive
CD74	1.95136e-21	1.13745	0.916	0.675	2.60877e-17	GBM.rec.PBMC	CD74	0.241	P10_CD4+CD8+Naive
ACTB	3.52285e-26	1.05659	1	1	4.7097e-22	GBM.rec.PBMC	ACTB	0	P10_CD4+CD8+Naive
ZYX	2.14003e-16	0.986819	0.723	0.383	2.86101e-12	GBM.rec.PBMC	ZYX	0.34	P10_CD4+CD8+Naive
PRF1	3.77794e-16	0.981644	0.916	0.802	5.05073e-12	GBM.rec.PBMC	PRF1	0.114	P10_CD4+CD8+Naive
PFN1	1.31216e-21	0.966391	0.952	0.982	1.75423e-17	GBM.rec.PBMC	PFN1	-0.03	P10_CD4+CD8+Naive
SPON2	9.08765e-10	0.96224	0.843	0.675	1.21493e-05	GBM.rec.PBMC	SPON2	0.168	P10_CD4+CD8+Naive
FXYD5	2.98809e-14	0.955957	0.904	0.854	3.99478e-10	GBM.rec.PBMC	FXYD5	0.05	P10_CD4+CD8+Naive
PSMB10	1.12493e-20	0.941128	0.795	0.399	1.50392e-16	GBM.rec.PBMC	PSMB10	0.396	P10_CD4+CD8+Naive
CD7	5.48986e-18	0.940446	0.928	0.886	7.33939e-14	GBM.rec.PBMC	CD7	0.042	P10_CD4+CD8+Naive
PCBP2	7.22196e-21	0.93886	0.952	0.872	9.65504e-17	GBM.rec.PBMC	PCBP2	0.08	P10_CD4+CD8+Naive
NME2	1.2304e-47	0.930709	0.53	0.026	1.64493e-43	GBM.rec.PBMC	NME2	0.504	P10_CD4+CD8+Naive
PCBP1	1.40096e-19	0.921997	0.928	0.866	1.87295e-15	GBM.rec.PBMC	PCBP1	0.062	P10_CD4+CD8+Naive
CTSW	7.02704e-18	0.908457	0.952	0.914	9.39445e-14	GBM.rec.PBMC	CTSW	0.038	P10_CD4+CD8+Naive
LIME1	1.13156e-41	0.873642	0.398	0.008	1.51278e-37	GBM.rec.PBMC	LIME1	0.39	P10_CD4+CD8+Naive
IFITM2	7.0793e-20	0.819335	0.988	0.954	9.46432e-16	GBM.rec.PBMC	IFITM2	0.034	P10_CD4+CD8+Naive
PPDPF	6.07511e-15	0.809672	0.928	0.894	8.12181e-11	GBM.rec.PBMC	PPDPF	0.034	P10_CD4+CD8+Naive
HLA-B	3.02025e-21	0.809131	1	0.998	4.03777e-17	GBM.rec.PBMC	HLA-B	0.002	P10_CD4+CD8+Naive
FCER1G	4.67084e-14	0.805016	0.819	0.553	6.24445e-10	GBM.rec.PBMC	FCER1G	0.266	P10_CD4+CD8+Naive
RAC2	1.27062e-19	0.803136	0.952	0.932	1.6987e-15	GBM.rec.PBMC	RAC2	0.02	P10_CD4+CD8+Naive
POLD4	6.1523e-22	0.790004	0.482	0.098	8.22501e-18	GBM.rec.PBMC	POLD4	0.384	P10_CD4+CD8+Naive
TTC38	4.37189e-15	0.776521	0.699	0.327	5.84478e-11	GBM.rec.PBMC	TTC38	0.372	P10_CD4+CD8+Naive
LSP1	5.68686e-19	0.767328	0.928	0.852	7.60277e-15	GBM.rec.PBMC	LSP1	0.076	P10_CD4+CD8+Naive
ZAP70	6.98903e-15	0.764477	0.819	0.605	9.34363e-11	GBM.rec.PBMC	ZAP70	0.214	P10_CD4+CD8+Naive
KRTCAP2	1.14194e-14	0.759443	0.783	0.487	1.52665e-10	GBM.rec.PBMC	KRTCAP2	0.296	P10_CD4+CD8+Naive
ARF5	6.191e-17	0.756326	0.747	0.381	8.27675e-13	GBM.rec.PBMC	ARF5	0.366	P10_CD4+CD8+Naive
CCND3	1.04312e-13	0.75228	0.892	0.816	1.39455e-09	GBM.rec.PBMC	CCND3	0.076	P10_CD4+CD8+Naive
S100A8	0.00285751	0.73338	0.313	0.184	1	GBM.rec.PBMC	S100A8	0.129	P10_CD4+CD8+Naive
RHOA	7.07567e-18	0.730085	0.94	0.868	9.45947e-14	GBM.rec.PBMC	RHOA	0.072	P10_CD4+CD8+Naive
ADGRG1	2.94189e-09	0.728736	0.723	0.531	3.93301e-05	GBM.rec.PBMC	ADGRG1	0.192	P10_CD4+CD8+Naive
CST7	5.94029e-12	0.727872	0.928	0.804	7.94157e-08	GBM.rec.PBMC	CST7	0.124	P10_CD4+CD8+Naive
DAZAP2	4.28526e-13	0.72172	0.892	0.81	5.72897e-09	GBM.rec.PBMC	DAZAP2	0.082	P10_CD4+CD8+Naive
RAB1B	3.70428e-11	0.718161	0.639	0.361	4.95225e-07	GBM.rec.PBMC	RAB1B	0.278	P10_CD4+CD8+Naive
PSMA6	2.54021e-11	0.715637	0.518	0.23	3.396e-07	GBM.rec.PBMC	PSMA6	0.288	P10_CD4+CD8+Naive
DUSP1	4.37931e-11	0.71293	0.855	0.647	5.8547e-07	GBM.rec.PBMC	DUSP1	0.208	P10_CD4+CD8+Naive
LAPTM5	5.55681e-19	0.712382	0.952	0.9	7.4289e-15	GBM.rec.PBMC	LAPTM5	0.052	P10_CD4+CD8+Naive
FGR	3.5454e-15	0.710384	0.699	0.327	4.73984e-11	GBM.rec.PBMC	FGR	0.372	P10_CD4+CD8+Naive
PXN	6.13299e-11	0.705914	0.699	0.449	8.1992e-07	GBM.rec.PBMC	PXN	0.25	P10_CD4+CD8+Naive
DDOST	7.92411e-20	0.705004	0.867	0.477	1.05937e-15	GBM.rec.PBMC	DDOST	0.39	P10_CD4+CD8+Naive
SLC44A2	1.85199e-07	0.697039	0.554	0.365	0.00247592	GBM.rec.PBMC	SLC44A2	0.189	P10_CD4+CD8+Naive
GAPDH	6.51603e-17	0.696679	0.952	0.962	8.71128e-13	GBM.rec.PBMC	GAPDH	-0.01	P10_CD4+CD8+Naive
RPN1	4.48447e-17	0.694164	0.675	0.295	5.99529e-13	GBM.rec.PBMC	RPN1	0.38	P10_CD4+CD8+Naive
EEF2	6.27877e-19	0.682161	0.964	0.964	8.39409e-15	GBM.rec.PBMC	EEF2	0	P10_CD4+CD8+Naive
TYROBP	1.84076e-08	0.679422	0.795	0.709	0.000246091	GBM.rec.PBMC	TYROBP	0.086	P10_CD4+CD8+Naive
TMIGD2	2.5065e-05	0.677497	0.446	0.271	0.335094	GBM.rec.PBMC	TMIGD2	0.175	P10_CD4+CD8+Naive
GPI	9.07832e-12	0.675193	0.639	0.325	1.21368e-07	GBM.rec.PBMC	GPI	0.314	P10_CD4+CD8+Naive
TAP1	3.25516e-14	0.669925	0.819	0.559	4.35183e-10	GBM.rec.PBMC	TAP1	0.26	P10_CD4+CD8+Naive
UCP2	2.30892e-11	0.666514	0.892	0.848	3.0868e-07	GBM.rec.PBMC	UCP2	0.044	P10_CD4+CD8+Naive
WDR1	2.40538e-12	0.662993	0.831	0.609	3.21575e-08	GBM.rec.PBMC	WDR1	0.222	P10_CD4+CD8+Naive
DUSP2	0.00187101	0.661944	0.614	0.539	1	GBM.rec.PBMC	DUSP2	0.075	P10_CD4+CD8+Naive
PPIA	1.10366e-17	0.65751	0.952	0.976	1.47548e-13	GBM.rec.PBMC	PPIA	-0.024	P10_CD4+CD8+Naive
SH2D2A	7.85341e-10	0.657462	0.59	0.335	1.04992e-05	GBM.rec.PBMC	SH2D2A	0.255	P10_CD4+CD8+Naive
SLC9A3R1	2.13297e-13	0.655243	0.904	0.687	2.85157e-09	GBM.rec.PBMC	SLC9A3R1	0.217	P10_CD4+CD8+Naive
FLT3LG	5.18202e-08	0.653562	0.59	0.369	0.000692784	GBM.rec.PBMC	FLT3LG	0.221	P10_CD4+CD8+Naive
PPP2R1A	4.66414e-10	0.64807	0.59	0.335	6.23549e-06	GBM.rec.PBMC	PPP2R1A	0.255	P10_CD4+CD8+Naive
PKM	7.66483e-11	0.645285	0.771	0.585	1.02471e-06	GBM.rec.PBMC	PKM	0.186	P10_CD4+CD8+Naive
SYNGR2	9.19932e-10	0.644508	0.494	0.238	1.22986e-05	GBM.rec.PBMC	SYNGR2	0.256	P10_CD4+CD8+Naive
CNN2	7.64513e-06	0.643945	0.723	0.637	0.102208	GBM.rec.PBMC	CNN2	0.086	P10_CD4+CD8+Naive
SELPLG	3.56483e-10	0.638314	0.855	0.671	4.76582e-06	GBM.rec.PBMC	SELPLG	0.184	P10_CD4+CD8+Naive
RAB24	6.04768e-19	0.635617	0.361	0.056	8.08514e-15	GBM.rec.PBMC	RAB24	0.305	P10_CD4+CD8+Naive
TPI1	3.0723e-13	0.628871	0.88	0.721	4.10736e-09	GBM.rec.PBMC	TPI1	0.159	P10_CD4+CD8+Naive
FCGR3A	1.03398e-07	0.626755	0.867	0.667	0.00138232	GBM.rec.PBMC	FCGR3A	0.2	P10_CD4+CD8+Naive
PPIB	2.66151e-11	0.616017	0.94	0.886	3.55817e-07	GBM.rec.PBMC	PPIB	0.054	P10_CD4+CD8+Naive
OTUB1	3.40596e-10	0.613564	0.675	0.397	4.55343e-06	GBM.rec.PBMC	OTUB1	0.278	P10_CD4+CD8+Naive
FLI1	2.1147e-09	0.613391	0.675	0.427	2.82715e-05	GBM.rec.PBMC	FLI1	0.248	P10_CD4+CD8+Naive
RAB11B	4.4327e-09	0.611109	0.602	0.343	5.92607e-05	GBM.rec.PBMC	RAB11B	0.259	P10_CD4+CD8+Naive
2021-09-09	5.30037e-11	0.602014	0.916	0.766	7.08607e-07	GBM.rec.PBMC	2021-09-09	0.15	P10_CD4+CD8+Naive
PSAP	5.46839e-11	0.601248	0.867	0.669	7.31068e-07	GBM.rec.PBMC	PSAP	0.198	P10_CD4+CD8+Naive
SHISA5	8.65873e-11	0.598495	0.735	0.485	1.15759e-06	GBM.rec.PBMC	SHISA5	0.25	P10_CD4+CD8+Naive
ARHGDIB	7.29716e-18	0.597623	0.988	0.974	9.75557e-14	GBM.rec.PBMC	ARHGDIB	0.014	P10_CD4+CD8+Naive
CORO1A	9.16423e-18	0.596542	0.952	0.958	1.22517e-13	GBM.rec.PBMC	CORO1A	-0.006	P10_CD4+CD8+Naive
CDK2AP2	6.42893e-07	0.593448	0.639	0.435	0.00859484	GBM.rec.PBMC	CDK2AP2	0.204	P10_CD4+CD8+Naive
LIMD2	3.70337e-13	0.589587	0.94	0.92	4.95103e-09	GBM.rec.PBMC	LIMD2	0.02	P10_CD4+CD8+Naive
MAN2B1	1.48676e-14	0.584987	0.337	0.07	1.98765e-10	GBM.rec.PBMC	MAN2B1	0.267	P10_CD4+CD8+Naive
NKG7	1.46925e-12	0.584555	0.928	0.88	1.96424e-08	GBM.rec.PBMC	NKG7	0.048	P10_CD4+CD8+Naive
GPSM3	5.92674e-11	0.582993	0.904	0.85	7.92345e-07	GBM.rec.PBMC	GPSM3	0.054	P10_CD4+CD8+Naive
ITGB2	1.50273e-09	0.574118	0.94	0.95	2.00899e-05	GBM.rec.PBMC	ITGB2	-0.01	P10_CD4+CD8+Naive
PIM2	1.09607e-08	0.571995	0.542	0.281	0.000146534	GBM.rec.PBMC	PIM2	0.261	P10_CD4+CD8+Naive
KIR3DL1	4.15938e-07	0.569607	0.265	0.09	0.00556067	GBM.rec.PBMC	KIR3DL1	0.175	P10_CD4+CD8+Naive
NAPA	2.04097e-08	0.569007	0.53	0.277	0.000272857	GBM.rec.PBMC	NAPA	0.253	P10_CD4+CD8+Naive
OXA1L	3.80884e-08	0.568286	0.614	0.377	0.000509204	GBM.rec.PBMC	OXA1L	0.237	P10_CD4+CD8+Naive
CFL1	6.49095e-17	0.561051	0.988	0.988	8.67775e-13	GBM.rec.PBMC	CFL1	0	P10_CD4+CD8+Naive
SH2D1B	6.0321e-07	0.558533	0.494	0.271	0.00806432	GBM.rec.PBMC	SH2D1B	0.223	P10_CD4+CD8+Naive
COX6A1	4.34997e-13	0.552598	0.916	0.828	5.81548e-09	GBM.rec.PBMC	COX6A1	0.088	P10_CD4+CD8+Naive
SH3BGRL3	4.00318e-16	0.551772	0.988	0.988	5.35185e-12	GBM.rec.PBMC	SH3BGRL3	0	P10_CD4+CD8+Naive
ABHD14B	2.64646e-09	0.551579	0.602	0.369	3.53805e-05	GBM.rec.PBMC	ABHD14B	0.233	P10_CD4+CD8+Naive
POLR2E	4.67407e-09	0.551541	0.614	0.377	6.24876e-05	GBM.rec.PBMC	POLR2E	0.237	P10_CD4+CD8+Naive
SYTL1	6.44263e-09	0.551011	0.807	0.601	8.61315e-05	GBM.rec.PBMC	SYTL1	0.206	P10_CD4+CD8+Naive
2021-09-01	1.22798e-10	0.550077	0.783	0.583	1.64168e-06	GBM.rec.PBMC	2021-09-01	0.2	P10_CD4+CD8+Naive
TAGLN2	1.48837e-08	0.549441	0.843	0.776	0.00019898	GBM.rec.PBMC	TAGLN2	0.067	P10_CD4+CD8+Naive
LY6E	4.6776e-08	0.549339	0.831	0.794	0.000625349	GBM.rec.PBMC	LY6E	0.037	P10_CD4+CD8+Naive
PHB2	7.78141e-05	0.549288	0.699	0.593	1	GBM.rec.PBMC	PHB2	0.106	P10_CD4+CD8+Naive
RNF167	9.68258e-06	0.547084	0.59	0.441	0.129446	GBM.rec.PBMC	RNF167	0.149	P10_CD4+CD8+Naive
NUCB1	1.43518e-07	0.546376	0.639	0.461	0.00191869	GBM.rec.PBMC	NUCB1	0.178	P10_CD4+CD8+Naive
LAT2	4.6252e-06	0.546179	0.41	0.212	0.0618344	GBM.rec.PBMC	LAT2	0.198	P10_CD4+CD8+Naive
G6PD	1.28142e-05	0.541573	0.458	0.269	0.171313	GBM.rec.PBMC	G6PD	0.189	P10_CD4+CD8+Naive
ACTG1	3.24797e-13	0.540551	0.988	0.988	4.34221e-09	GBM.rec.PBMC	ACTG1	0	P10_CD4+CD8+Naive
SDF4	1.87659e-06	0.538893	0.675	0.523	0.0250882	GBM.rec.PBMC	SDF4	0.152	P10_CD4+CD8+Naive
HSD17B11	8.31665e-05	0.536052	0.53	0.385	1	GBM.rec.PBMC	HSD17B11	0.145	P10_CD4+CD8+Naive
INO80E	3.8228e-07	0.534619	0.458	0.22	0.00511071	GBM.rec.PBMC	INO80E	0.238	P10_CD4+CD8+Naive
CD3E	1.73116e-05	0.533163	0.795	0.898	0.231438	GBM.rec.PBMC	CD3E	-0.103	P10_CD4+CD8+Naive
ANXA6	2.32885e-08	0.53289	0.892	0.784	0.000311344	GBM.rec.PBMC	ANXA6	0.108	P10_CD4+CD8+Naive
SLC25A39	8.99435e-06	0.532645	0.458	0.275	0.120245	GBM.rec.PBMC	SLC25A39	0.183	P10_CD4+CD8+Naive
AUP1	1.51753e-08	0.530722	0.614	0.367	0.000202879	GBM.rec.PBMC	AUP1	0.247	P10_CD4+CD8+Naive
COX16	1.13088e-11	0.528479	0.398	0.124	1.51187e-07	GBM.rec.PBMC	COX16	0.274	P10_CD4+CD8+Naive
IL2RB	1.73046e-06	0.521052	0.735	0.607	0.0231345	GBM.rec.PBMC	IL2RB	0.128	P10_CD4+CD8+Naive
FCMR	3.12949e-05	0.520381	0.759	0.607	0.418381	GBM.rec.PBMC	FCMR	0.152	P10_CD4+CD8+Naive
CD99	9.2547e-09	0.519729	0.867	0.872	0.000123726	GBM.rec.PBMC	CD99	-0.005	P10_CD4+CD8+Naive
ADAM8	1.55728e-06	0.516912	0.494	0.293	0.0208193	GBM.rec.PBMC	ADAM8	0.201	P10_CD4+CD8+Naive
HSF1	8.84991e-11	0.514397	0.482	0.2	1.18314e-06	GBM.rec.PBMC	HSF1	0.282	P10_CD4+CD8+Naive
BSG	1.20637e-09	0.513368	0.759	0.531	1.61279e-05	GBM.rec.PBMC	BSG	0.228	P10_CD4+CD8+Naive
FLOT2	1.8249e-07	0.512516	0.566	0.347	0.00243971	GBM.rec.PBMC	FLOT2	0.219	P10_CD4+CD8+Naive
PSTPIP1	2.67325e-08	0.509648	0.554	0.303	0.000357387	GBM.rec.PBMC	PSTPIP1	0.251	P10_CD4+CD8+Naive
EMD	2.80551e-07	0.506192	0.554	0.343	0.00375068	GBM.rec.PBMC	EMD	0.211	P10_CD4+CD8+Naive
VSIR	5.5223e-06	0.504527	0.687	0.533	0.0738277	GBM.rec.PBMC	VSIR	0.154	P10_CD4+CD8+Naive
ITGB7	1.78084e-07	0.500978	0.699	0.531	0.00238081	GBM.rec.PBMC	ITGB7	0.168	P10_CD4+CD8+Naive
EEF1A1	1.46047e-12	0.500697	1	1	1.9525e-08	GBM.rec.PBMC	EEF1A1	0	P10_CD4+CD8+Naive
TINF2	0.00705853	0.500001	0.434	0.345	1	GBM.rec.PBMC	TINF2	0.089	P10_CD4+CD8+Naive
HLA-A	2.15363e-14	0.499997	1	1	2.87918e-10	GBM.rec.PBMC	HLA-A	0	P10_CD4+CD8+Naive
SASH3	7.70668e-07	0.4996	0.639	0.455	0.0103031	GBM.rec.PBMC	SASH3	0.184	P10_CD4+CD8+Naive
MVP	4.90989e-05	0.49951	0.518	0.349	0.656404	GBM.rec.PBMC	MVP	0.169	P10_CD4+CD8+Naive
ANXA11	5.26818e-08	0.49812	0.795	0.647	0.000704303	GBM.rec.PBMC	ANXA11	0.148	P10_CD4+CD8+Naive
LAMP1	3.22718e-08	0.49743	0.723	0.517	0.000431442	GBM.rec.PBMC	LAMP1	0.206	P10_CD4+CD8+Naive
SRGN	7.01412e-10	0.496995	0.952	0.932	9.37717e-06	GBM.rec.PBMC	SRGN	0.02	P10_CD4+CD8+Naive
PNPLA2	7.28445e-06	0.493987	0.422	0.232	0.0973859	GBM.rec.PBMC	PNPLA2	0.19	P10_CD4+CD8+Naive
RHOG	4.96501e-08	0.490788	0.723	0.523	0.000663772	GBM.rec.PBMC	RHOG	0.2	P10_CD4+CD8+Naive
PPP4C	0.000464374	0.490504	0.554	0.461	1	GBM.rec.PBMC	PPP4C	0.093	P10_CD4+CD8+Naive
CD37	1.55481e-10	0.490455	0.94	0.924	2.07863e-06	GBM.rec.PBMC	CD37	0.016	P10_CD4+CD8+Naive
SLC25A20	7.73553e-07	0.489887	0.361	0.16	0.0103416	GBM.rec.PBMC	SLC25A20	0.201	P10_CD4+CD8+Naive
SNRPA	9.40793e-05	0.485466	0.422	0.271	1	GBM.rec.PBMC	SNRPA	0.151	P10_CD4+CD8+Naive
TBC1D10C	1.78715e-09	0.483208	0.88	0.788	2.38924e-05	GBM.rec.PBMC	TBC1D10C	0.092	P10_CD4+CD8+Naive
PGAM1	1.07685e-09	0.483076	0.783	0.543	1.43965e-05	GBM.rec.PBMC	PGAM1	0.24	P10_CD4+CD8+Naive
EIF5A	1.05937e-10	0.482718	0.928	0.814	1.41627e-06	GBM.rec.PBMC	EIF5A	0.114	P10_CD4+CD8+Naive
VPS51	5.12944e-06	0.482618	0.699	0.511	0.0685755	GBM.rec.PBMC	VPS51	0.188	P10_CD4+CD8+Naive
SNRPD2	2.27074e-07	0.482335	0.892	0.854	0.00303576	GBM.rec.PBMC	SNRPD2	0.038	P10_CD4+CD8+Naive
WAS	8.19308e-06	0.481377	0.735	0.639	0.109533	GBM.rec.PBMC	WAS	0.096	P10_CD4+CD8+Naive
TMBIM1	3.44726e-08	0.480944	0.458	0.214	0.000460864	GBM.rec.PBMC	TMBIM1	0.244	P10_CD4+CD8+Naive
LAT	1.02671e-05	0.479589	0.687	0.643	0.13726	GBM.rec.PBMC	LAT	0.044	P10_CD4+CD8+Naive
GSTK1	4.72184e-08	0.478964	0.892	0.818	0.000631263	GBM.rec.PBMC	GSTK1	0.074	P10_CD4+CD8+Naive
SIGIRR	9.93315e-07	0.47837	0.747	0.613	0.0132796	GBM.rec.PBMC	SIGIRR	0.134	P10_CD4+CD8+Naive
HIGD2A	3.11833e-05	0.475074	0.855	0.782	0.416889	GBM.rec.PBMC	HIGD2A	0.073	P10_CD4+CD8+Naive
APMAP	4.51109e-05	0.474637	0.711	0.595	0.603088	GBM.rec.PBMC	APMAP	0.116	P10_CD4+CD8+Naive
TMC8	3.11048e-07	0.474148	0.711	0.541	0.0041584	GBM.rec.PBMC	TMC8	0.17	P10_CD4+CD8+Naive
CLIC1	1.1532e-11	0.474074	0.952	0.94	1.54171e-07	GBM.rec.PBMC	CLIC1	0.012	P10_CD4+CD8+Naive
PPP1CA	7.34719e-08	0.473523	0.88	0.836	0.000982246	GBM.rec.PBMC	PPP1CA	0.044	P10_CD4+CD8+Naive
ARF1	1.05667e-05	0.467602	0.807	0.758	0.141266	GBM.rec.PBMC	ARF1	0.049	P10_CD4+CD8+Naive
LCK	1.13832e-06	0.467396	0.843	0.84	0.0152182	GBM.rec.PBMC	LCK	0.003	P10_CD4+CD8+Naive
IGFBP7	0.00116785	0.467277	0.53	0.417	1	GBM.rec.PBMC	IGFBP7	0.113	P10_CD4+CD8+Naive
CNBP	5.91508e-09	0.466253	0.916	0.882	7.90787e-05	GBM.rec.PBMC	CNBP	0.034	P10_CD4+CD8+Naive
C19orf66	2.38443e-05	0.4654	0.59	0.411	0.318775	GBM.rec.PBMC	C19orf66	0.179	P10_CD4+CD8+Naive
TSC22D3	8.53071e-08	0.464876	0.952	0.954	0.00114047	GBM.rec.PBMC	TSC22D3	-0.002	P10_CD4+CD8+Naive
PRR13	1.74569e-07	0.464101	0.843	0.772	0.00233381	GBM.rec.PBMC	PRR13	0.071	P10_CD4+CD8+Naive
ARL5A	6.25196e-07	0.461571	0.434	0.218	0.00835825	GBM.rec.PBMC	ARL5A	0.216	P10_CD4+CD8+Naive
SELENOW	3.80573e-06	0.461169	0.831	0.707	0.0508788	GBM.rec.PBMC	SELENOW	0.124	P10_CD4+CD8+Naive
KLRB1	3.05583e-07	0.458504	0.867	0.697	0.00408534	GBM.rec.PBMC	KLRB1	0.17	P10_CD4+CD8+Naive
ARHGAP4	0.00241878	0.458371	0.542	0.451	1	GBM.rec.PBMC	ARHGAP4	0.091	P10_CD4+CD8+Naive
ADGRE5	3.8124e-06	0.457561	0.831	0.735	0.050968	GBM.rec.PBMC	ADGRE5	0.096	P10_CD4+CD8+Naive
NDUFV1	1.30738e-06	0.456668	0.614	0.413	0.0174784	GBM.rec.PBMC	NDUFV1	0.201	P10_CD4+CD8+Naive
ANXA2	5.59019e-08	0.455232	0.747	0.559	0.000747352	GBM.rec.PBMC	ANXA2	0.188	P10_CD4+CD8+Naive
CDC25B	4.34653e-06	0.451478	0.614	0.415	0.0581088	GBM.rec.PBMC	CDC25B	0.199	P10_CD4+CD8+Naive
TMEM173	0.000147592	0.450378	0.53	0.385	1	GBM.rec.PBMC	TMEM173	0.145	P10_CD4+CD8+Naive
MAP2K3	1.64801e-07	0.45035	0.494	0.263	0.00220323	GBM.rec.PBMC	MAP2K3	0.231	P10_CD4+CD8+Naive
MGAT1	0.000157043	0.450131	0.506	0.351	1	GBM.rec.PBMC	MGAT1	0.155	P10_CD4+CD8+Naive
TRABD	1.08132e-05	0.448858	0.627	0.475	0.144561	GBM.rec.PBMC	TRABD	0.152	P10_CD4+CD8+Naive
PSME1	2.49143e-10	0.448022	0.952	0.934	3.33079e-06	GBM.rec.PBMC	PSME1	0.018	P10_CD4+CD8+Naive
MAT2B	3.81307e-08	0.444278	0.747	0.549	0.000509769	GBM.rec.PBMC	MAT2B	0.198	P10_CD4+CD8+Naive
P4HB	1.41495e-08	0.444131	0.831	0.697	0.000189165	GBM.rec.PBMC	P4HB	0.134	P10_CD4+CD8+Naive
TPST2	6.95331e-07	0.442879	0.735	0.579	0.00929588	GBM.rec.PBMC	TPST2	0.156	P10_CD4+CD8+Naive
ARHGEF1	2.12424e-05	0.440646	0.867	0.786	0.28399	GBM.rec.PBMC	ARHGEF1	0.081	P10_CD4+CD8+Naive
CYBC1	1.8808e-07	0.440344	0.614	0.385	0.00251444	GBM.rec.PBMC	CYBC1	0.229	P10_CD4+CD8+Naive
CLIC3	0.00204319	0.438948	0.699	0.625	1	GBM.rec.PBMC	CLIC3	0.074	P10_CD4+CD8+Naive
ARHGDIA	1.11326e-07	0.437042	0.807	0.673	0.00148832	GBM.rec.PBMC	ARHGDIA	0.134	P10_CD4+CD8+Naive
SARAF	9.00496e-09	0.437023	0.952	0.96	0.000120387	GBM.rec.PBMC	SARAF	-0.008	P10_CD4+CD8+Naive
EIF3F	2.27484e-08	0.436549	0.843	0.914	0.000304124	GBM.rec.PBMC	EIF3F	-0.071	P10_CD4+CD8+Naive
TUBB	1.37809e-06	0.436381	0.675	0.557	0.0184237	GBM.rec.PBMC	TUBB	0.118	P10_CD4+CD8+Naive
BCL2L1	3.02105e-09	0.435904	0.458	0.188	4.03885e-05	GBM.rec.PBMC	BCL2L1	0.27	P10_CD4+CD8+Naive
PFKL	1.75624e-07	0.435376	0.47	0.228	0.00234792	GBM.rec.PBMC	PFKL	0.242	P10_CD4+CD8+Naive
PIM1	1.40815e-05	0.434588	0.747	0.599	0.188256	GBM.rec.PBMC	PIM1	0.148	P10_CD4+CD8+Naive
BIN1	5.02365e-07	0.434152	0.759	0.695	0.00671612	GBM.rec.PBMC	BIN1	0.064	P10_CD4+CD8+Naive
NCSTN	4.71625e-07	0.432446	0.337	0.128	0.00630515	GBM.rec.PBMC	NCSTN	0.209	P10_CD4+CD8+Naive
UBE2L6	4.25981e-06	0.428887	0.614	0.437	0.0569494	GBM.rec.PBMC	UBE2L6	0.177	P10_CD4+CD8+Naive
EIF3L	7.45027e-07	0.428364	0.819	0.806	0.00996027	GBM.rec.PBMC	EIF3L	0.013	P10_CD4+CD8+Naive
ARID5A	2.59942e-06	0.428122	0.53	0.307	0.0347517	GBM.rec.PBMC	ARID5A	0.223	P10_CD4+CD8+Naive
BCAP31	1.38305e-06	0.427706	0.723	0.577	0.01849	GBM.rec.PBMC	BCAP31	0.146	P10_CD4+CD8+Naive
ELOVL1	8.93507e-06	0.426173	0.398	0.214	0.119453	GBM.rec.PBMC	ELOVL1	0.184	P10_CD4+CD8+Naive
SMARCB1	0.00156567	0.425983	0.446	0.325	1	GBM.rec.PBMC	SMARCB1	0.121	P10_CD4+CD8+Naive
COTL1	0.000388792	0.424449	0.639	0.549	1	GBM.rec.PBMC	COTL1	0.09	P10_CD4+CD8+Naive
RHBDD2	0.000259288	0.424026	0.265	0.128	1	GBM.rec.PBMC	RHBDD2	0.137	P10_CD4+CD8+Naive
C1orf162	1.3467e-05	0.423605	0.723	0.603	0.180041	GBM.rec.PBMC	C1orf162	0.12	P10_CD4+CD8+Naive
SCAMP2	4.52586e-06	0.423009	0.639	0.437	0.0605062	GBM.rec.PBMC	SCAMP2	0.202	P10_CD4+CD8+Naive
SLC25A5	9.98007e-07	0.422512	0.831	0.754	0.0133424	GBM.rec.PBMC	SLC25A5	0.077	P10_CD4+CD8+Naive
PSME2	2.96554e-06	0.420981	0.88	0.832	0.0396463	GBM.rec.PBMC	PSME2	0.048	P10_CD4+CD8+Naive
RGS14	1.57006e-06	0.420326	0.494	0.267	0.0209901	GBM.rec.PBMC	RGS14	0.227	P10_CD4+CD8+Naive
SYK	0.00643226	0.419601	0.265	0.154	1	GBM.rec.PBMC	SYK	0.111	P10_CD4+CD8+Naive
MDH2	2.92409e-07	0.418261	0.735	0.573	0.00390921	GBM.rec.PBMC	MDH2	0.162	P10_CD4+CD8+Naive
TBRG1	0.000226105	0.417823	0.53	0.383	1	GBM.rec.PBMC	TBRG1	0.147	P10_CD4+CD8+Naive
SF3B4	3.88097e-05	0.416458	0.434	0.259	0.518847	GBM.rec.PBMC	SF3B4	0.175	P10_CD4+CD8+Naive
CD320	0.00035528	0.416085	0.47	0.329	1	GBM.rec.PBMC	CD320	0.141	P10_CD4+CD8+Naive
GSTP1	3.13897e-07	0.415949	0.892	0.814	0.00419649	GBM.rec.PBMC	GSTP1	0.078	P10_CD4+CD8+Naive
TMC6	5.37866e-06	0.415811	0.723	0.553	0.0719073	GBM.rec.PBMC	TMC6	0.17	P10_CD4+CD8+Naive
TEX264	3.28121e-06	0.415739	0.627	0.415	0.0438665	GBM.rec.PBMC	TEX264	0.212	P10_CD4+CD8+Naive
CYB5R3	6.56461e-08	0.414176	0.446	0.198	0.000877623	GBM.rec.PBMC	CYB5R3	0.248	P10_CD4+CD8+Naive
TCIRG1	7.25203e-05	0.412819	0.434	0.261	0.969524	GBM.rec.PBMC	TCIRG1	0.173	P10_CD4+CD8+Naive
TSC22D4	9.0895e-08	0.412806	0.711	0.511	0.00121518	GBM.rec.PBMC	TSC22D4	0.2	P10_CD4+CD8+Naive
HMGN4	2.83745e-09	0.41071	0.422	0.166	3.79339e-05	GBM.rec.PBMC	HMGN4	0.256	P10_CD4+CD8+Naive
IDH2	1.0024e-05	0.410553	0.614	0.433	0.134011	GBM.rec.PBMC	IDH2	0.181	P10_CD4+CD8+Naive
FKBP8	1.43775e-06	0.409847	0.771	0.625	0.0192212	GBM.rec.PBMC	FKBP8	0.146	P10_CD4+CD8+Naive
HMGN3	3.65335e-06	0.409415	0.759	0.591	0.0488417	GBM.rec.PBMC	HMGN3	0.168	P10_CD4+CD8+Naive
PAXX	7.40517e-05	0.408446	0.795	0.721	0.989998	GBM.rec.PBMC	PAXX	0.074	P10_CD4+CD8+Naive
HCLS1	7.71965e-07	0.408429	0.843	0.832	0.0103204	GBM.rec.PBMC	HCLS1	0.011	P10_CD4+CD8+Naive
PPP1R18	4.00068e-06	0.406193	0.735	0.621	0.0534851	GBM.rec.PBMC	PPP1R18	0.114	P10_CD4+CD8+Naive
CAPZB	1.03126e-08	0.405335	0.952	0.874	0.000137869	GBM.rec.PBMC	CAPZB	0.078	P10_CD4+CD8+Naive
DDIT4	0.00200367	0.403239	0.843	0.814	1	GBM.rec.PBMC	DDIT4	0.029	P10_CD4+CD8+Naive
PGK1	7.08298e-06	0.403143	0.819	0.707	0.0946924	GBM.rec.PBMC	PGK1	0.112	P10_CD4+CD8+Naive
PLD3	2.00273e-05	0.401806	0.434	0.251	0.267745	GBM.rec.PBMC	PLD3	0.183	P10_CD4+CD8+Naive
CD300A	0.000144737	0.400263	0.566	0.369	1	GBM.rec.PBMC	CD300A	0.197	P10_CD4+CD8+Naive
CD247	1.26732e-05	0.399722	0.916	0.902	0.169428	GBM.rec.PBMC	CD247	0.014	P10_CD4+CD8+Naive
GOLPH3	0.000120616	0.399608	0.458	0.305	1	GBM.rec.PBMC	GOLPH3	0.153	P10_CD4+CD8+Naive
SSR2	1.00711e-07	0.399011	0.94	0.906	0.00134641	GBM.rec.PBMC	SSR2	0.034	P10_CD4+CD8+Naive
LGALS1	0.000428244	0.39865	0.735	0.625	1	GBM.rec.PBMC	LGALS1	0.11	P10_CD4+CD8+Naive
HOPX	0.000119301	0.396516	0.783	0.681	1	GBM.rec.PBMC	HOPX	0.102	P10_CD4+CD8+Naive
RIN3	6.67616e-05	0.394063	0.566	0.387	0.892536	GBM.rec.PBMC	RIN3	0.179	P10_CD4+CD8+Naive
NCR3	0.000231655	0.392491	0.506	0.359	1	GBM.rec.PBMC	NCR3	0.147	P10_CD4+CD8+Naive
PTPN6	0.000704154	0.392374	0.735	0.629	1	GBM.rec.PBMC	PTPN6	0.106	P10_CD4+CD8+Naive
FKBP1A	0.000201515	0.392298	0.651	0.533	1	GBM.rec.PBMC	FKBP1A	0.118	P10_CD4+CD8+Naive
FLNA	5.00961e-06	0.392102	0.928	0.872	0.0669734	GBM.rec.PBMC	FLNA	0.056	P10_CD4+CD8+Naive
CISH	0.00174088	0.39181	0.373	0.242	1	GBM.rec.PBMC	CISH	0.131	P10_CD4+CD8+Naive
UBIAD1	5.50603e-07	0.389692	0.301	0.11	0.00736101	GBM.rec.PBMC	UBIAD1	0.191	P10_CD4+CD8+Naive
DENND2D	5.50442e-06	0.389257	0.723	0.561	0.0735886	GBM.rec.PBMC	DENND2D	0.162	P10_CD4+CD8+Naive
TECR	0.000605368	0.388894	0.711	0.609	1	GBM.rec.PBMC	TECR	0.102	P10_CD4+CD8+Naive
MVD	0.0032868	0.388235	0.361	0.228	1	GBM.rec.PBMC	MVD	0.133	P10_CD4+CD8+Naive
ERGIC3	0.000889446	0.38759	0.53	0.421	1	GBM.rec.PBMC	ERGIC3	0.109	P10_CD4+CD8+Naive
CAT	9.1448e-06	0.386805	0.47	0.261	0.122257	GBM.rec.PBMC	CAT	0.209	P10_CD4+CD8+Naive
PTDSS1	6.56831e-07	0.385394	0.47	0.244	0.00878117	GBM.rec.PBMC	PTDSS1	0.226	P10_CD4+CD8+Naive
PRDX3	0.00314075	0.384653	0.349	0.228	1	GBM.rec.PBMC	PRDX3	0.121	P10_CD4+CD8+Naive
HMOX2	0.000916401	0.383102	0.639	0.591	1	GBM.rec.PBMC	HMOX2	0.048	P10_CD4+CD8+Naive
DDX39A	0.00107848	0.382468	0.434	0.311	1	GBM.rec.PBMC	DDX39A	0.123	P10_CD4+CD8+Naive
MYO1G	4.60641e-06	0.382229	0.819	0.675	0.0615832	GBM.rec.PBMC	MYO1G	0.144	P10_CD4+CD8+Naive
HCFC1R1	0.00011311	0.381697	0.337	0.184	1	GBM.rec.PBMC	HCFC1R1	0.153	P10_CD4+CD8+Naive
TRAPPC1	6.24345e-09	0.379003	0.831	0.719	8.34686e-05	GBM.rec.PBMC	TRAPPC1	0.112	P10_CD4+CD8+Naive
OSBPL5	0.00077604	0.378243	0.301	0.166	1	GBM.rec.PBMC	OSBPL5	0.135	P10_CD4+CD8+Naive
SF3A2	2.158e-05	0.377718	0.458	0.273	0.288504	GBM.rec.PBMC	SF3A2	0.185	P10_CD4+CD8+Naive
SQSTM1	4.83495e-05	0.37694	0.783	0.649	0.646384	GBM.rec.PBMC	SQSTM1	0.134	P10_CD4+CD8+Naive
C1orf43	1.12248e-05	0.376772	0.53	0.335	0.150064	GBM.rec.PBMC	C1orf43	0.195	P10_CD4+CD8+Naive
BANF1	0.000448648	0.375749	0.627	0.533	1	GBM.rec.PBMC	BANF1	0.094	P10_CD4+CD8+Naive
SIGMAR1	2.23684e-05	0.37524	0.301	0.134	0.299043	GBM.rec.PBMC	SIGMAR1	0.167	P10_CD4+CD8+Naive
DEF6	0.00250929	0.375203	0.566	0.469	1	GBM.rec.PBMC	DEF6	0.097	P10_CD4+CD8+Naive
PTGER2	0.000218969	0.374797	0.663	0.559	1	GBM.rec.PBMC	PTGER2	0.104	P10_CD4+CD8+Naive
GLIPR2	0.000927391	0.374647	0.59	0.493	1	GBM.rec.PBMC	GLIPR2	0.097	P10_CD4+CD8+Naive
ZFP36L2	2.98905e-06	0.374576	0.976	0.96	0.0399606	GBM.rec.PBMC	ZFP36L2	0.016	P10_CD4+CD8+Naive
RASGRP2	4.9611e-05	0.374355	0.711	0.595	0.663249	GBM.rec.PBMC	RASGRP2	0.116	P10_CD4+CD8+Naive
POMC	2.29158e-07	0.372634	0.277	0.09	0.00306361	GBM.rec.PBMC	POMC	0.187	P10_CD4+CD8+Naive
APH1A	7.61614e-07	0.372604	0.627	0.423	0.010182	GBM.rec.PBMC	APH1A	0.204	P10_CD4+CD8+Naive
RASSF5	0.00436505	0.37225	0.723	0.653	1	GBM.rec.PBMC	RASSF5	0.07	P10_CD4+CD8+Naive
TRMT112	0.00258232	0.370692	0.759	0.703	1	GBM.rec.PBMC	TRMT112	0.056	P10_CD4+CD8+Naive
CNPY3	3.99224e-05	0.370264	0.578	0.389	0.533723	GBM.rec.PBMC	CNPY3	0.189	P10_CD4+CD8+Naive
METTL26	7.90026e-05	0.368361	0.59	0.439	1	GBM.rec.PBMC	METTL26	0.151	P10_CD4+CD8+Naive
MRPL4	6.64627e-05	0.366367	0.458	0.291	0.88854	GBM.rec.PBMC	MRPL4	0.167	P10_CD4+CD8+Naive
FPGS	7.77251e-06	0.366361	0.373	0.18	0.103911	GBM.rec.PBMC	FPGS	0.193	P10_CD4+CD8+Naive
HLA-C	4.3327e-17	0.366144	1	0.996	5.79239e-13	GBM.rec.PBMC	HLA-C	0.004	P10_CD4+CD8+Naive
ARRB2	0.00721867	0.366017	0.614	0.559	1	GBM.rec.PBMC	ARRB2	0.055	P10_CD4+CD8+Naive
MIEN1	0.000316591	0.365854	0.554	0.413	1	GBM.rec.PBMC	MIEN1	0.141	P10_CD4+CD8+Naive
TWF2	9.55941e-05	0.365782	0.639	0.505	1	GBM.rec.PBMC	TWF2	0.134	P10_CD4+CD8+Naive
NELFE	0.00102141	0.365476	0.458	0.329	1	GBM.rec.PBMC	NELFE	0.129	P10_CD4+CD8+Naive
WASHC1	1.0885e-05	0.365337	0.422	0.228	0.145522	GBM.rec.PBMC	WASHC1	0.194	P10_CD4+CD8+Naive
GNPTG	3.37489e-06	0.365255	0.386	0.186	0.045119	GBM.rec.PBMC	GNPTG	0.2	P10_CD4+CD8+Naive
RASSF1	0.000222527	0.364525	0.675	0.529	1	GBM.rec.PBMC	RASSF1	0.146	P10_CD4+CD8+Naive
LCP2	0.00117346	0.36442	0.723	0.681	1	GBM.rec.PBMC	LCP2	0.042	P10_CD4+CD8+Naive
SRP9	6.93614e-06	0.364065	0.807	0.715	0.0927293	GBM.rec.PBMC	SRP9	0.092	P10_CD4+CD8+Naive
ULK3	0.000648936	0.363601	0.289	0.158	1	GBM.rec.PBMC	ULK3	0.131	P10_CD4+CD8+Naive
MFNG	7.33903e-05	0.362534	0.602	0.431	0.981154	GBM.rec.PBMC	MFNG	0.171	P10_CD4+CD8+Naive
ASMTL	0.000637018	0.362424	0.289	0.156	1	GBM.rec.PBMC	ASMTL	0.133	P10_CD4+CD8+Naive
UQCRC1	1.26962e-06	0.361305	0.518	0.305	0.0169736	GBM.rec.PBMC	UQCRC1	0.213	P10_CD4+CD8+Naive
RBM42	3.32544e-05	0.359858	0.386	0.212	0.444579	GBM.rec.PBMC	RBM42	0.174	P10_CD4+CD8+Naive
DPP7	0.00446816	0.359852	0.651	0.617	1	GBM.rec.PBMC	DPP7	0.034	P10_CD4+CD8+Naive
SMIM29	2.35917e-05	0.359647	0.349	0.176	0.315398	GBM.rec.PBMC	SMIM29	0.173	P10_CD4+CD8+Naive
NUTF2	0.00320551	0.359609	0.422	0.311	1	GBM.rec.PBMC	NUTF2	0.111	P10_CD4+CD8+Naive
KCNA3	1.44105e-07	0.359473	0.253	0.076	0.00192654	GBM.rec.PBMC	KCNA3	0.177	P10_CD4+CD8+Naive
MEA1	2.55721e-06	0.359186	0.518	0.295	0.0341873	GBM.rec.PBMC	MEA1	0.223	P10_CD4+CD8+Naive
VIM	1.61443e-05	0.359107	0.94	0.936	0.215833	GBM.rec.PBMC	VIM	0.004	P10_CD4+CD8+Naive
AMZ2	1.15195e-06	0.358911	0.494	0.259	0.0154005	GBM.rec.PBMC	AMZ2	0.235	P10_CD4+CD8+Naive
CUTA	0.000240384	0.357072	0.783	0.705	1	GBM.rec.PBMC	CUTA	0.078	P10_CD4+CD8+Naive
SLC35B2	3.58198e-07	0.356613	0.277	0.094	0.00478875	GBM.rec.PBMC	SLC35B2	0.183	P10_CD4+CD8+Naive
CALHM2	8.19753e-07	0.35612	0.277	0.092	0.0109593	GBM.rec.PBMC	CALHM2	0.185	P10_CD4+CD8+Naive
NAALADL1	6.08797e-06	0.355043	0.301	0.124	0.0813901	GBM.rec.PBMC	NAALADL1	0.177	P10_CD4+CD8+Naive
TMUB1	8.39471e-05	0.354918	0.446	0.287	1	GBM.rec.PBMC	TMUB1	0.159	P10_CD4+CD8+Naive
CALM3	0.000215791	0.353541	0.819	0.685	1	GBM.rec.PBMC	CALM3	0.134	P10_CD4+CD8+Naive
CLPP	2.31639e-06	0.35308	0.602	0.393	0.0309678	GBM.rec.PBMC	CLPP	0.209	P10_CD4+CD8+Naive
IL10RA	0.000230777	0.352557	0.711	0.585	1	GBM.rec.PBMC	IL10RA	0.126	P10_CD4+CD8+Naive
DCTN2	0.00121373	0.352365	0.482	0.377	1	GBM.rec.PBMC	DCTN2	0.105	P10_CD4+CD8+Naive
PIK3R5	0.00173561	0.352222	0.41	0.289	1	GBM.rec.PBMC	PIK3R5	0.121	P10_CD4+CD8+Naive
DCXR	2.5467e-05	0.351981	0.578	0.411	0.340469	GBM.rec.PBMC	DCXR	0.167	P10_CD4+CD8+Naive
LITAF	4.08434e-07	0.351682	0.916	0.882	0.00546035	GBM.rec.PBMC	LITAF	0.034	P10_CD4+CD8+Naive
RHOF	3.11725e-05	0.351517	0.651	0.509	0.416745	GBM.rec.PBMC	RHOF	0.142	P10_CD4+CD8+Naive
CCNI	2.18807e-07	0.351174	0.928	0.924	0.00292523	GBM.rec.PBMC	CCNI	0.004	P10_CD4+CD8+Naive
TOMM5	8.34256e-05	0.350741	0.446	0.265	1	GBM.rec.PBMC	TOMM5	0.181	P10_CD4+CD8+Naive
XRCC6	7.60828e-05	0.350597	0.807	0.729	1	GBM.rec.PBMC	XRCC6	0.078	P10_CD4+CD8+Naive
GRINA	7.21691e-06	0.350249	0.301	0.122	0.0964829	GBM.rec.PBMC	GRINA	0.179	P10_CD4+CD8+Naive
RAB7A	0.000191871	0.349854	0.627	0.487	1	GBM.rec.PBMC	RAB7A	0.14	P10_CD4+CD8+Naive
STARD3	0.000209941	0.349831	0.349	0.198	1	GBM.rec.PBMC	STARD3	0.151	P10_CD4+CD8+Naive
MAD2L2	5.14933e-05	0.349698	0.373	0.196	0.688415	GBM.rec.PBMC	MAD2L2	0.177	P10_CD4+CD8+Naive
UBL7	1.81135e-06	0.349422	0.337	0.142	0.024216	GBM.rec.PBMC	UBL7	0.195	P10_CD4+CD8+Naive
FTL	2.59772e-10	0.348614	1	0.994	3.47289e-06	GBM.rec.PBMC	FTL	0.006	P10_CD4+CD8+Naive
FDFT1	3.17855e-05	0.34801	0.542	0.355	0.424941	GBM.rec.PBMC	FDFT1	0.187	P10_CD4+CD8+Naive
FTH1	3.59191e-09	0.347495	0.988	0.986	4.80203e-05	GBM.rec.PBMC	FTH1	0.002	P10_CD4+CD8+Naive
PTGDR	0.000411969	0.347298	0.602	0.441	1	GBM.rec.PBMC	PTGDR	0.161	P10_CD4+CD8+Naive
TNFRSF14	0.00373296	0.347289	0.663	0.621	1	GBM.rec.PBMC	TNFRSF14	0.042	P10_CD4+CD8+Naive
MYL12A	2.66393e-11	0.346776	0.988	0.982	3.56141e-07	GBM.rec.PBMC	MYL12A	0.006	P10_CD4+CD8+Naive
CSRP1	7.56007e-07	0.344079	0.349	0.146	0.0101071	GBM.rec.PBMC	CSRP1	0.203	P10_CD4+CD8+Naive
ICAM2	0.000364314	0.343628	0.663	0.557	1	GBM.rec.PBMC	ICAM2	0.106	P10_CD4+CD8+Naive
MUS81	9.08503e-05	0.343565	0.313	0.152	1	GBM.rec.PBMC	MUS81	0.161	P10_CD4+CD8+Naive
AAMP	0.00132354	0.343438	0.386	0.251	1	GBM.rec.PBMC	AAMP	0.135	P10_CD4+CD8+Naive
DOK2	6.13413e-06	0.342971	0.807	0.637	0.0820071	GBM.rec.PBMC	DOK2	0.17	P10_CD4+CD8+Naive
GLTP	7.04589e-05	0.342075	0.494	0.305	0.941965	GBM.rec.PBMC	GLTP	0.189	P10_CD4+CD8+Naive
COX5A	0.000180263	0.342057	0.711	0.601	1	GBM.rec.PBMC	COX5A	0.11	P10_CD4+CD8+Naive
C9orf16	1.10289e-05	0.341101	0.843	0.788	0.147445	GBM.rec.PBMC	C9orf16	0.055	P10_CD4+CD8+Naive
PPP1CC	4.52459e-05	0.340931	0.663	0.565	0.604893	GBM.rec.PBMC	PPP1CC	0.098	P10_CD4+CD8+Naive
TMEM179B	0.000559929	0.33977	0.506	0.381	1	GBM.rec.PBMC	TMEM179B	0.125	P10_CD4+CD8+Naive
IL12RB1	2.6399e-05	0.339676	0.41	0.22	0.352929	GBM.rec.PBMC	IL12RB1	0.19	P10_CD4+CD8+Naive
ADA	0.00795207	0.339558	0.361	0.257	1	GBM.rec.PBMC	ADA	0.104	P10_CD4+CD8+Naive
FBXW5	0.00274892	0.339424	0.566	0.485	1	GBM.rec.PBMC	FBXW5	0.081	P10_CD4+CD8+Naive
R3HDM4	0.00026067	0.339319	0.506	0.361	1	GBM.rec.PBMC	R3HDM4	0.145	P10_CD4+CD8+Naive
RAC1	7.56833e-06	0.33831	0.795	0.651	0.101181	GBM.rec.PBMC	RAC1	0.144	P10_CD4+CD8+Naive
SLC25A6	2.34683e-05	0.337185	0.916	0.952	0.313748	GBM.rec.PBMC	SLC25A6	-0.036	P10_CD4+CD8+Naive
TAPBPL	0.00686738	0.336119	0.301	0.188	1	GBM.rec.PBMC	TAPBPL	0.113	P10_CD4+CD8+Naive
FTSJ1	1.62726e-06	0.336073	0.313	0.122	0.0217548	GBM.rec.PBMC	FTSJ1	0.191	P10_CD4+CD8+Naive
SURF4	1.28755e-05	0.334922	0.53	0.321	0.172132	GBM.rec.PBMC	SURF4	0.209	P10_CD4+CD8+Naive
PRSS23	0.00369548	0.33454	0.53	0.423	1	GBM.rec.PBMC	PRSS23	0.107	P10_CD4+CD8+Naive
ABRACL	0.00022303	0.333154	0.771	0.731	1	GBM.rec.PBMC	ABRACL	0.04	P10_CD4+CD8+Naive
TNFRSF1A	0.000822581	0.332996	0.361	0.222	1	GBM.rec.PBMC	TNFRSF1A	0.139	P10_CD4+CD8+Naive
PRNP	0.000351506	0.332869	0.41	0.263	1	GBM.rec.PBMC	PRNP	0.147	P10_CD4+CD8+Naive
COMT	0.000685843	0.33244	0.434	0.289	1	GBM.rec.PBMC	COMT	0.145	P10_CD4+CD8+Naive
LAIR1	0.0091726	0.332043	0.422	0.323	1	GBM.rec.PBMC	LAIR1	0.099	P10_CD4+CD8+Naive
SELENOT	0.000341873	0.33171	0.651	0.543	1	GBM.rec.PBMC	SELENOT	0.108	P10_CD4+CD8+Naive
EVL	2.79101e-07	0.331317	0.916	0.956	0.0037313	GBM.rec.PBMC	EVL	-0.04	P10_CD4+CD8+Naive
TADA3	0.00160955	0.330635	0.542	0.427	1	GBM.rec.PBMC	TADA3	0.115	P10_CD4+CD8+Naive
PPP3CC	7.52885e-05	0.330468	0.59	0.397	1	GBM.rec.PBMC	PPP3CC	0.193	P10_CD4+CD8+Naive
ARRDC1	0.00036895	0.330065	0.373	0.234	1	GBM.rec.PBMC	ARRDC1	0.139	P10_CD4+CD8+Naive
OXLD1	0.00315546	0.329308	0.446	0.323	1	GBM.rec.PBMC	OXLD1	0.123	P10_CD4+CD8+Naive
VAMP8	6.37194e-05	0.329266	0.855	0.828	0.851865	GBM.rec.PBMC	VAMP8	0.027	P10_CD4+CD8+Naive
LCMT1	0.000410486	0.329195	0.386	0.232	1	GBM.rec.PBMC	LCMT1	0.154	P10_CD4+CD8+Naive
COPZ1	7.24122e-06	0.329063	0.59	0.371	0.0968079	GBM.rec.PBMC	COPZ1	0.219	P10_CD4+CD8+Naive
GMDS	0.000315499	0.328768	0.277	0.132	1	GBM.rec.PBMC	GMDS	0.145	P10_CD4+CD8+Naive
CD6	0.00343787	0.327193	0.59	0.495	1	GBM.rec.PBMC	CD6	0.095	P10_CD4+CD8+Naive
TNFRSF1B	1.85732e-05	0.327042	0.639	0.459	0.248305	GBM.rec.PBMC	TNFRSF1B	0.18	P10_CD4+CD8+Naive
GPS1	3.78978e-05	0.326515	0.446	0.261	0.506655	GBM.rec.PBMC	GPS1	0.185	P10_CD4+CD8+Naive
DHRS7	0.000624132	0.326234	0.771	0.709	1	GBM.rec.PBMC	DHRS7	0.062	P10_CD4+CD8+Naive
BIN2	1.27632e-05	0.326	0.916	0.892	0.170631	GBM.rec.PBMC	BIN2	0.024	P10_CD4+CD8+Naive
SCAMP3	5.31026e-06	0.325297	0.386	0.182	0.0709929	GBM.rec.PBMC	SCAMP3	0.204	P10_CD4+CD8+Naive
HSD17B10	0.00832896	0.324593	0.446	0.339	1	GBM.rec.PBMC	HSD17B10	0.107	P10_CD4+CD8+Naive
CPSF7	0.000101092	0.324258	0.373	0.198	1	GBM.rec.PBMC	CPSF7	0.175	P10_CD4+CD8+Naive
BHLHE40	0.00580937	0.324124	0.386	0.289	1	GBM.rec.PBMC	BHLHE40	0.097	P10_CD4+CD8+Naive
RABGGTA	4.37211e-07	0.323187	0.289	0.102	0.00584508	GBM.rec.PBMC	RABGGTA	0.187	P10_CD4+CD8+Naive
AGTRAP	0.000244364	0.32299	0.518	0.341	1	GBM.rec.PBMC	AGTRAP	0.177	P10_CD4+CD8+Naive
AP1B1	0.00088533	0.322883	0.277	0.146	1	GBM.rec.PBMC	AP1B1	0.131	P10_CD4+CD8+Naive
DUSP12	0.000290281	0.322625	0.373	0.214	1	GBM.rec.PBMC	DUSP12	0.159	P10_CD4+CD8+Naive
NAAA	0.000528861	0.322368	0.482	0.309	1	GBM.rec.PBMC	NAAA	0.173	P10_CD4+CD8+Naive
S1PR5	0.000944494	0.322251	0.614	0.471	1	GBM.rec.PBMC	S1PR5	0.143	P10_CD4+CD8+Naive
HPS1	0.000448269	0.322057	0.446	0.309	1	GBM.rec.PBMC	HPS1	0.137	P10_CD4+CD8+Naive
TRGC2	1.59957e-05	1.75809	0.727	0.275	0.213846	HealthyDonor	TRGC2	0.452	P10_CD4+CD8+Naive
LAG3	0.000132854	1.42531	0.364	0.074	1	HealthyDonor	LAG3	0.29	P10_CD4+CD8+Naive
CRIP1	5.73502e-05	1.39665	0.818	0.459	0.766715	HealthyDonor	CRIP1	0.359	P10_CD4+CD8+Naive
GZMH	9.8303e-05	1.371	0.909	0.704	1	HealthyDonor	GZMH	0.205	P10_CD4+CD8+Naive
CD741	1.86787e-06	1.26992	1	0.704	0.0249715	HealthyDonor	CD74	0.296	P10_CD4+CD8+Naive
FCRL6	0.00240638	1.26539	0.636	0.354	1	HealthyDonor	FCRL6	0.282	P10_CD4+CD8+Naive
JUN	0.00139278	1.24156	0.909	0.758	1	HealthyDonor	JUN	0.151	P10_CD4+CD8+Naive
IER2	6.72456e-05	1.16321	1	0.834	0.899007	HealthyDonor	IER2	0.166	P10_CD4+CD8+Naive
NCR31	0.000518688	1.10565	0.727	0.373	1	HealthyDonor	NCR3	0.354	P10_CD4+CD8+Naive
PMAIP1	0.000202942	1.08798	0.545	0.184	1	HealthyDonor	PMAIP1	0.361	P10_CD4+CD8+Naive
GPAA1	0.00561615	1.05654	0.545	0.261	1	HealthyDonor	GPAA1	0.284	P10_CD4+CD8+Naive
RBCK1	0.00187548	1.04966	0.727	0.525	1	HealthyDonor	RBCK1	0.202	P10_CD4+CD8+Naive
NKG71	1.44412e-06	1.04697	1	0.884	0.0193064	HealthyDonor	NKG7	0.116	P10_CD4+CD8+Naive
CCL5	0.000312929	1.03857	0.909	0.839	1	HealthyDonor	CCL5	0.07	P10_CD4+CD8+Naive
ACTB1	3.58188e-06	1.01926	1	1	0.0478862	HealthyDonor	ACTB	0	P10_CD4+CD8+Naive
ID2	0.000172201	0.991893	0.909	0.862	1	HealthyDonor	ID2	0.047	P10_CD4+CD8+Naive
TMEM273	0.00110369	0.973706	0.364	0.096	1	HealthyDonor	TMEM273	0.268	P10_CD4+CD8+Naive
DPM3	0.00013586	0.960945	0.727	0.327	1	HealthyDonor	DPM3	0.4	P10_CD4+CD8+Naive
HLA-A1	1.00511e-07	0.933262	1	1	0.00134373	HealthyDonor	HLA-A	0	P10_CD4+CD8+Naive
PRR14	0.00546797	0.922767	0.364	0.121	1	HealthyDonor	PRR14	0.243	P10_CD4+CD8+Naive
GNLY	6.59726e-05	0.908394	1	0.8	0.881988	HealthyDonor	GNLY	0.2	P10_CD4+CD8+Naive
PFN11	3.05797e-06	0.904774	1	0.977	0.040882	HealthyDonor	PFN1	0.023	P10_CD4+CD8+Naive
TBC1D25	0.00159059	0.904696	0.364	0.098	1	HealthyDonor	TBC1D25	0.266	P10_CD4+CD8+Naive
HLA-C1	2.97283e-08	0.880125	1	0.996	0.000397438	HealthyDonor	HLA-C	0.004	P10_CD4+CD8+Naive
SMIM14	0.00448802	0.863422	0.545	0.24	1	HealthyDonor	SMIM14	0.305	P10_CD4+CD8+Naive
RGS2	0.000676317	0.838227	0.636	0.268	1	HealthyDonor	RGS2	0.368	P10_CD4+CD8+Naive
CD53	0.00121146	0.830842	0.818	0.827	1	HealthyDonor	CD53	-0.009	P10_CD4+CD8+Naive
PRF11	0.000109929	0.823756	1	0.814	1	HealthyDonor	PRF1	0.186	P10_CD4+CD8+Naive
TENT5C	0.0006048	0.822025	0.455	0.133	1	HealthyDonor	TENT5C	0.322	P10_CD4+CD8+Naive
CTSW1	2.90229e-05	0.799517	1	0.918	0.388007	HealthyDonor	CTSW	0.082	P10_CD4+CD8+Naive
MATK	0.00192447	0.792575	0.818	0.625	1	HealthyDonor	MATK	0.193	P10_CD4+CD8+Naive
IL32	3.21379e-05	0.791987	0.909	0.939	0.429651	HealthyDonor	IL32	-0.03	P10_CD4+CD8+Naive
IL2RG1	0.000641341	0.788673	0.818	0.75	1	HealthyDonor	IL2RG	0.068	P10_CD4+CD8+Naive
TMSB4X	1.92623e-07	0.772755	1	1	0.00257517	HealthyDonor	TMSB4X	0	P10_CD4+CD8+Naive
B2M	3.13049e-08	0.771262	1	1	0.000418515	HealthyDonor	B2M	0	P10_CD4+CD8+Naive
IFI44L	0.000482117	0.757362	0.273	0.046	1	HealthyDonor	IFI44L	0.227	P10_CD4+CD8+Naive
SRP68	0.00960627	0.741989	0.545	0.284	1	HealthyDonor	SRP68	0.261	P10_CD4+CD8+Naive
HCST	0.000474541	0.741502	0.909	0.981	1	HealthyDonor	HCST	-0.072	P10_CD4+CD8+Naive
GZMB	0.000771328	0.733643	1	0.778	1	HealthyDonor	GZMB	0.222	P10_CD4+CD8+Naive
GZMA	0.00521687	0.724847	0.818	0.842	1	HealthyDonor	GZMA	-0.024	P10_CD4+CD8+Naive
GATD3A	1.87241e-09	0.722043	0.273	0.016	2.50323e-05	HealthyDonor	GATD3A	0.257	P10_CD4+CD8+Naive
SPCS2	0.000132188	0.714184	0.909	0.783	1	HealthyDonor	SPCS2	0.126	P10_CD4+CD8+Naive
SIGLEC7	0.00353442	0.710688	0.364	0.11	1	HealthyDonor	SIGLEC7	0.254	P10_CD4+CD8+Naive
OAZ1	3.23262e-05	0.699137	1	0.968	0.432169	HealthyDonor	OAZ1	0.032	P10_CD4+CD8+Naive
TSC22D41	0.00871127	0.697595	0.727	0.536	1	HealthyDonor	TSC22D4	0.191	P10_CD4+CD8+Naive
CORO1A1	0.000129688	0.697422	1	0.956	1	HealthyDonor	CORO1A	0.044	P10_CD4+CD8+Naive
TSPO	0.00208056	0.688535	0.818	0.802	1	HealthyDonor	TSPO	0.016	P10_CD4+CD8+Naive
ERI3	0.00424307	0.685185	0.455	0.175	1	HealthyDonor	ERI3	0.28	P10_CD4+CD8+Naive
CCND31	0.000901276	0.673439	0.909	0.825	1	HealthyDonor	CCND3	0.084	P10_CD4+CD8+Naive
CYBA	0.00116377	0.670556	1	0.996	1	HealthyDonor	CYBA	0.004	P10_CD4+CD8+Naive
LSP11	0.00779263	0.670047	0.818	0.863	1	HealthyDonor	LSP1	-0.045	P10_CD4+CD8+Naive
S100A4	0.000120549	0.663691	1	0.986	1	HealthyDonor	S100A4	0.014	P10_CD4+CD8+Naive
SRGN1	3.54617e-05	0.651259	1	0.933	0.474087	HealthyDonor	SRGN	0.067	P10_CD4+CD8+Naive
COX7A2	0.00119609	0.646096	0.909	0.89	1	HealthyDonor	COX7A2	0.019	P10_CD4+CD8+Naive
EEF1G	0.00100865	0.642373	0.273	0.053	1	HealthyDonor	EEF1G	0.22	P10_CD4+CD8+Naive
TMA7	0.00479636	0.636913	0.909	0.982	1	HealthyDonor	TMA7	-0.073	P10_CD4+CD8+Naive
HLA-B1	1.34978e-05	0.623046	1	0.998	0.180452	HealthyDonor	HLA-B	0.002	P10_CD4+CD8+Naive
RIOX1	0.000939442	0.610759	0.364	0.086	1	HealthyDonor	RIOX1	0.278	P10_CD4+CD8+Naive
UBC	0.00128795	0.609974	1	0.989	1	HealthyDonor	UBC	0.011	P10_CD4+CD8+Naive
ITGB21	0.000540874	0.593995	1	0.947	1	HealthyDonor	ITGB2	0.053	P10_CD4+CD8+Naive
ERCC2	0.000488831	0.57721	0.273	0.047	1	HealthyDonor	ERCC2	0.226	P10_CD4+CD8+Naive
CFL11	0.000268366	0.567941	0.909	0.989	1	HealthyDonor	CFL1	-0.08	P10_CD4+CD8+Naive
COX5B	0.00108442	0.564557	0.909	0.879	1	HealthyDonor	COX5B	0.03	P10_CD4+CD8+Naive
SNRPB	0.00221691	0.543388	0.909	0.781	1	HealthyDonor	SNRPB	0.128	P10_CD4+CD8+Naive
RDH5	0.00261955	0.537673	0.273	0.06	1	HealthyDonor	RDH5	0.213	P10_CD4+CD8+Naive
LAMTOR4	0.0027775	0.527729	0.909	0.811	1	HealthyDonor	LAMTOR4	0.098	P10_CD4+CD8+Naive
UQCR11	0.00528405	0.498911	0.818	0.902	1	HealthyDonor	UQCR11	-0.084	P10_CD4+CD8+Naive
CST71	0.00797135	0.494095	0.909	0.82	1	HealthyDonor	CST7	0.089	P10_CD4+CD8+Naive
SRP14	0.00733884	0.481619	0.818	0.967	1	HealthyDonor	SRP14	-0.149	P10_CD4+CD8+Naive
H3F3B	0.00521833	0.445863	1	0.996	1	HealthyDonor	H3F3B	0.004	P10_CD4+CD8+Naive
RAC21	0.00587459	0.405015	0.909	0.935	1	HealthyDonor	RAC2	-0.026	P10_CD4+CD8+Naive
ZNHIT2	0.00512116	0.370971	0.273	0.067	1	HealthyDonor	ZNHIT2	0.206	P10_CD4+CD8+Naive
HIST1H1D	2.4502e-48	1.16977	0.554	0.18	3.27567e-44	GBM.pembro.PBMC	HIST1H1D	0.374	P11_CD4-CD8-LTB+IL7R+
ETS1	1.60926e-60	0.758796	0.862	0.534	2.15143e-56	GBM.pembro.PBMC	ETS1	0.328	P11_CD4-CD8-LTB+IL7R+
HIST2H2AC	6.28762e-36	0.697413	0.426	0.111	8.40592e-32	GBM.pembro.PBMC	HIST2H2AC	0.315	P11_CD4-CD8-LTB+IL7R+
HIST1H4C	1.69114e-34	0.685734	0.669	0.345	2.26089e-30	GBM.pembro.PBMC	HIST1H4C	0.324	P11_CD4-CD8-LTB+IL7R+
HIST1H1E	1.62932e-27	0.670554	0.609	0.308	2.17824e-23	GBM.pembro.PBMC	HIST1H1E	0.301	P11_CD4-CD8-LTB+IL7R+
SYNE2	1.86183e-42	0.653687	0.865	0.573	2.48908e-38	GBM.pembro.PBMC	SYNE2	0.292	P11_CD4-CD8-LTB+IL7R+
FAM107B	1.157e-50	0.632339	0.804	0.403	1.5468e-46	GBM.pembro.PBMC	FAM107B	0.401	P11_CD4-CD8-LTB+IL7R+
PHACTR2	2.52472e-33	0.57988	0.682	0.327	3.3753e-29	GBM.pembro.PBMC	PHACTR2	0.355	P11_CD4-CD8-LTB+IL7R+
GCC2	6.72081e-34	0.576687	0.662	0.306	8.98505e-30	GBM.pembro.PBMC	GCC2	0.356	P11_CD4-CD8-LTB+IL7R+
KIAA1551	1.05178e-30	0.57643	0.742	0.411	1.40612e-26	GBM.pembro.PBMC	KIAA1551	0.331	P11_CD4-CD8-LTB+IL7R+
MYBL1	6.34855e-32	0.575206	0.663	0.34	8.48738e-28	GBM.pembro.PBMC	MYBL1	0.323	P11_CD4-CD8-LTB+IL7R+
BRD7	9.93991e-39	0.572103	0.504	0.151	1.32887e-34	GBM.pembro.PBMC	BRD7	0.353	P11_CD4-CD8-LTB+IL7R+
MACF1	4.0921e-32	0.563835	0.733	0.411	5.47073e-28	GBM.pembro.PBMC	MACF1	0.322	P11_CD4-CD8-LTB+IL7R+
VPS13C	3.94275e-30	0.546134	0.652	0.339	5.27106e-26	GBM.pembro.PBMC	VPS13C	0.313	P11_CD4-CD8-LTB+IL7R+
KLF2	4.13232e-44	0.544018	0.883	0.622	5.5245e-40	GBM.pembro.PBMC	KLF2	0.261	P11_CD4-CD8-LTB+IL7R+
CDV3	9.78173e-36	0.537471	0.612	0.247	1.30772e-31	GBM.pembro.PBMC	CDV3	0.365	P11_CD4-CD8-LTB+IL7R+
HIST1H1C	8.02323e-21	0.532018	0.427	0.18	1.07263e-16	GBM.pembro.PBMC	HIST1H1C	0.247	P11_CD4-CD8-LTB+IL7R+
NRIP1	8.90803e-23	0.515445	0.349	0.118	1.19091e-18	GBM.pembro.PBMC	NRIP1	0.231	P11_CD4-CD8-LTB+IL7R+
KLF13	1.31418e-34	0.514767	0.682	0.326	1.75692e-30	GBM.pembro.PBMC	KLF13	0.356	P11_CD4-CD8-LTB+IL7R+
CCNL1	3.33142e-33	0.513295	0.764	0.444	4.45378e-29	GBM.pembro.PBMC	CCNL1	0.32	P11_CD4-CD8-LTB+IL7R+
RNF19A	2.56586e-21	0.497742	0.454	0.205	3.4303e-17	GBM.pembro.PBMC	RNF19A	0.249	P11_CD4-CD8-LTB+IL7R+
ARL4C	8.28313e-33	0.487287	0.878	0.678	1.10737e-28	GBM.pembro.PBMC	ARL4C	0.2	P11_CD4-CD8-LTB+IL7R+
RORA	2.03754e-28	0.486319	0.796	0.504	2.72399e-24	GBM.pembro.PBMC	RORA	0.292	P11_CD4-CD8-LTB+IL7R+
PRDM1	2.27339e-26	0.481996	0.694	0.394	3.03929e-22	GBM.pembro.PBMC	PRDM1	0.3	P11_CD4-CD8-LTB+IL7R+
URI1	3.50182e-26	0.474033	0.499	0.205	4.68159e-22	GBM.pembro.PBMC	URI1	0.294	P11_CD4-CD8-LTB+IL7R+
PRKDC	1.7598e-21	0.47256	0.538	0.267	2.35268e-17	GBM.pembro.PBMC	PRKDC	0.271	P11_CD4-CD8-LTB+IL7R+
BORCS5	8.08487e-23	0.471449	0.399	0.149	1.08087e-18	GBM.pembro.PBMC	BORCS5	0.25	P11_CD4-CD8-LTB+IL7R+
PIK3R1	7.59938e-28	0.46986	0.719	0.417	1.01596e-23	GBM.pembro.PBMC	PIK3R1	0.302	P11_CD4-CD8-LTB+IL7R+
BCL2	4.71099e-22	0.466895	0.584	0.304	6.29812e-18	GBM.pembro.PBMC	BCL2	0.28	P11_CD4-CD8-LTB+IL7R+
PPP1R14B	6.06328e-32	0.46571	0.423	0.119	8.106e-28	GBM.pembro.PBMC	PPP1R14B	0.304	P11_CD4-CD8-LTB+IL7R+
MZT2B	1.47363e-36	0.463603	0.823	0.429	1.9701e-32	GBM.pembro.PBMC	MZT2B	0.394	P11_CD4-CD8-LTB+IL7R+
CDC14A	1.90434e-30	0.454352	0.588	0.262	2.54592e-26	GBM.pembro.PBMC	CDC14A	0.326	P11_CD4-CD8-LTB+IL7R+
KIF2A	3.71316e-21	0.453706	0.652	0.385	4.96412e-17	GBM.pembro.PBMC	KIF2A	0.267	P11_CD4-CD8-LTB+IL7R+
ANKRD11	2.50537e-22	0.447492	0.585	0.303	3.34942e-18	GBM.pembro.PBMC	ANKRD11	0.282	P11_CD4-CD8-LTB+IL7R+
JUND	1.29348e-40	0.444896	0.736	0.337	1.72925e-36	GBM.pembro.PBMC	JUND	0.399	P11_CD4-CD8-LTB+IL7R+
MALT1	1.81841e-22	0.442765	0.353	0.118	2.43103e-18	GBM.pembro.PBMC	MALT1	0.235	P11_CD4-CD8-LTB+IL7R+
KMT2A	1.32817e-27	0.440831	0.602	0.273	1.77564e-23	GBM.pembro.PBMC	KMT2A	0.329	P11_CD4-CD8-LTB+IL7R+
TLE4	9.78576e-20	0.438142	0.423	0.191	1.30826e-15	GBM.pembro.PBMC	TLE4	0.232	P11_CD4-CD8-LTB+IL7R+
UTRN	2.25853e-21	0.437316	0.63	0.362	3.01943e-17	GBM.pembro.PBMC	UTRN	0.268	P11_CD4-CD8-LTB+IL7R+
CHD4	3.12225e-22	0.432932	0.489	0.218	4.17413e-18	GBM.pembro.PBMC	CHD4	0.271	P11_CD4-CD8-LTB+IL7R+
PRPF4B	6.55699e-26	0.432901	0.617	0.308	8.76604e-22	GBM.pembro.PBMC	PRPF4B	0.309	P11_CD4-CD8-LTB+IL7R+
PNN	1.36602e-24	0.430567	0.7	0.416	1.82624e-20	GBM.pembro.PBMC	PNN	0.284	P11_CD4-CD8-LTB+IL7R+
GLS	2.75181e-24	0.428755	0.546	0.242	3.6789e-20	GBM.pembro.PBMC	GLS	0.304	P11_CD4-CD8-LTB+IL7R+
H1FX	4.19412e-19	0.428577	0.45	0.209	5.60712e-15	GBM.pembro.PBMC	H1FX	0.241	P11_CD4-CD8-LTB+IL7R+
GOLGB1	5.00053e-20	0.427351	0.476	0.223	6.68521e-16	GBM.pembro.PBMC	GOLGB1	0.253	P11_CD4-CD8-LTB+IL7R+
DDX3Y	2.90907e-45	0.416714	0.324	0.016	3.88914e-41	GBM.pembro.PBMC	DDX3Y	0.308	P11_CD4-CD8-LTB+IL7R+
SRRM2	1.47765e-31	0.416031	0.809	0.473	1.97547e-27	GBM.pembro.PBMC	SRRM2	0.336	P11_CD4-CD8-LTB+IL7R+
RNF213	6.84598e-27	0.415742	0.831	0.571	9.1524e-23	GBM.pembro.PBMC	RNF213	0.26	P11_CD4-CD8-LTB+IL7R+
TRGC2	6.15825e-17	0.41533	0.536	0.293	8.23296e-13	GBM.pembro.PBMC	TRGC2	0.243	P11_CD4-CD8-LTB+IL7R+
TLK2	1.32394e-20	0.415313	0.271	0.074	1.76998e-16	GBM.pembro.PBMC	TLK2	0.197	P11_CD4-CD8-LTB+IL7R+
BPTF	3.09576e-24	0.411665	0.627	0.329	4.13872e-20	GBM.pembro.PBMC	BPTF	0.298	P11_CD4-CD8-LTB+IL7R+
TLN1	1.43996e-28	0.411494	0.725	0.39	1.92508e-24	GBM.pembro.PBMC	TLN1	0.335	P11_CD4-CD8-LTB+IL7R+
TOP2B	3.59212e-17	0.408585	0.391	0.173	4.8023e-13	GBM.pembro.PBMC	TOP2B	0.218	P11_CD4-CD8-LTB+IL7R+
CYLD	3.32148e-18	0.407869	0.556	0.303	4.44048e-14	GBM.pembro.PBMC	CYLD	0.253	P11_CD4-CD8-LTB+IL7R+
PCM1	4.15282e-17	0.400851	0.525	0.296	5.55191e-13	GBM.pembro.PBMC	PCM1	0.229	P11_CD4-CD8-LTB+IL7R+
TRAPPC10	3.72131e-20	0.398944	0.358	0.129	4.97502e-16	GBM.pembro.PBMC	TRAPPC10	0.229	P11_CD4-CD8-LTB+IL7R+
CFAP97	2.92514e-15	0.396635	0.447	0.234	3.91061e-11	GBM.pembro.PBMC	CFAP97	0.213	P11_CD4-CD8-LTB+IL7R+
GIMAP1	4.25114e-18	0.39651	0.617	0.35	5.68335e-14	GBM.pembro.PBMC	GIMAP1	0.267	P11_CD4-CD8-LTB+IL7R+
BOD1L1	2.41798e-22	0.394553	0.511	0.231	3.23259e-18	GBM.pembro.PBMC	BOD1L1	0.28	P11_CD4-CD8-LTB+IL7R+
INTS6	3.0773e-19	0.393918	0.412	0.167	4.11404e-15	GBM.pembro.PBMC	INTS6	0.245	P11_CD4-CD8-LTB+IL7R+
EMB	3.67333e-21	0.393625	0.737	0.458	4.91088e-17	GBM.pembro.PBMC	EMB	0.279	P11_CD4-CD8-LTB+IL7R+
AKAP9	2.23899e-20	0.392544	0.624	0.342	2.99331e-16	GBM.pembro.PBMC	AKAP9	0.282	P11_CD4-CD8-LTB+IL7R+
SET	1.49994e-25	0.392308	0.795	0.507	2.00528e-21	GBM.pembro.PBMC	SET	0.288	P11_CD4-CD8-LTB+IL7R+
CTDSPL2	4.74203e-19	0.389476	0.309	0.103	6.33962e-15	GBM.pembro.PBMC	CTDSPL2	0.206	P11_CD4-CD8-LTB+IL7R+
TPR	9.12854e-17	0.387392	0.642	0.398	1.22039e-12	GBM.pembro.PBMC	TPR	0.244	P11_CD4-CD8-LTB+IL7R+
DDX21	4.18931e-21	0.385459	0.595	0.318	5.60069e-17	GBM.pembro.PBMC	DDX21	0.277	P11_CD4-CD8-LTB+IL7R+
RCAN3	6.33256e-17	0.384487	0.406	0.191	8.466e-13	GBM.pembro.PBMC	RCAN3	0.215	P11_CD4-CD8-LTB+IL7R+
PRRC2C	4.21132e-25	0.38359	0.827	0.579	5.63011e-21	GBM.pembro.PBMC	PRRC2C	0.248	P11_CD4-CD8-LTB+IL7R+
DDX3X	2.04354e-21	0.38102	0.687	0.416	2.73201e-17	GBM.pembro.PBMC	DDX3X	0.271	P11_CD4-CD8-LTB+IL7R+
NUB1	1.40107e-16	0.37913	0.49	0.254	1.8731e-12	GBM.pembro.PBMC	NUB1	0.236	P11_CD4-CD8-LTB+IL7R+
CEMIP2	8.12022e-14	0.379012	0.348	0.162	1.08559e-09	GBM.pembro.PBMC	CEMIP2	0.186	P11_CD4-CD8-LTB+IL7R+
SMARCC1	1.14878e-15	0.377973	0.334	0.141	1.5358e-11	GBM.pembro.PBMC	SMARCC1	0.193	P11_CD4-CD8-LTB+IL7R+
EPB41	1.76456e-19	0.377911	0.609	0.337	2.35903e-15	GBM.pembro.PBMC	EPB41	0.272	P11_CD4-CD8-LTB+IL7R+
EIF2S2	8.76124e-23	0.377443	0.605	0.304	1.17129e-18	GBM.pembro.PBMC	EIF2S2	0.301	P11_CD4-CD8-LTB+IL7R+
TUT4	9.78238e-18	0.376775	0.532	0.282	1.30781e-13	GBM.pembro.PBMC	TUT4	0.25	P11_CD4-CD8-LTB+IL7R+
PLCG2	2.76337e-18	0.375387	0.282	0.088	3.69434e-14	GBM.pembro.PBMC	PLCG2	0.194	P11_CD4-CD8-LTB+IL7R+
DHX36	1.71514e-18	0.374996	0.535	0.282	2.29297e-14	GBM.pembro.PBMC	DHX36	0.253	P11_CD4-CD8-LTB+IL7R+
CDK13	1.0197e-18	0.374921	0.473	0.223	1.36324e-14	GBM.pembro.PBMC	CDK13	0.25	P11_CD4-CD8-LTB+IL7R+
RBM39	3.76137e-25	0.374868	0.86	0.617	5.02858e-21	GBM.pembro.PBMC	RBM39	0.243	P11_CD4-CD8-LTB+IL7R+
GOLGA4	8.07764e-18	0.37406	0.568	0.314	1.0799e-13	GBM.pembro.PBMC	GOLGA4	0.254	P11_CD4-CD8-LTB+IL7R+
PHF3	1.38353e-17	0.373763	0.501	0.262	1.84964e-13	GBM.pembro.PBMC	PHF3	0.239	P11_CD4-CD8-LTB+IL7R+
XPO1	4.69354e-15	0.372811	0.384	0.178	6.2748e-11	GBM.pembro.PBMC	XPO1	0.206	P11_CD4-CD8-LTB+IL7R+
BDP1	3.58884e-16	0.372722	0.453	0.223	4.79792e-12	GBM.pembro.PBMC	BDP1	0.23	P11_CD4-CD8-LTB+IL7R+
PAK2	1.16497e-19	0.372369	0.675	0.406	1.55745e-15	GBM.pembro.PBMC	PAK2	0.269	P11_CD4-CD8-LTB+IL7R+
TXNIP	1.80454e-31	0.37105	0.992	0.921	2.41249e-27	GBM.pembro.PBMC	TXNIP	0.071	P11_CD4-CD8-LTB+IL7R+
NUFIP2	1.18842e-23	0.371001	0.443	0.167	1.58879e-19	GBM.pembro.PBMC	NUFIP2	0.276	P11_CD4-CD8-LTB+IL7R+
KLRF1	7.87514e-10	0.370799	0.275	0.134	1.05283e-05	GBM.pembro.PBMC	KLRF1	0.141	P11_CD4-CD8-LTB+IL7R+
SETX	4.64072e-17	0.370048	0.468	0.231	6.20418e-13	GBM.pembro.PBMC	SETX	0.237	P11_CD4-CD8-LTB+IL7R+
PIP4K2A	1.92052e-27	0.369971	0.687	0.347	2.56754e-23	GBM.pembro.PBMC	PIP4K2A	0.34	P11_CD4-CD8-LTB+IL7R+
FRYL	4.25898e-16	0.368414	0.351	0.144	5.69383e-12	GBM.pembro.PBMC	FRYL	0.207	P11_CD4-CD8-LTB+IL7R+
PPP1R10	1.25163e-19	0.367077	0.401	0.162	1.6733e-15	GBM.pembro.PBMC	PPP1R10	0.239	P11_CD4-CD8-LTB+IL7R+
SMARCA5	5.58283e-18	0.366683	0.504	0.259	7.46368e-14	GBM.pembro.PBMC	SMARCA5	0.245	P11_CD4-CD8-LTB+IL7R+
KANSL1	2.64514e-21	0.364555	0.511	0.244	3.53628e-17	GBM.pembro.PBMC	KANSL1	0.267	P11_CD4-CD8-LTB+IL7R+
CRYBG1	5.39628e-14	0.360922	0.44	0.242	7.21429e-10	GBM.pembro.PBMC	CRYBG1	0.198	P11_CD4-CD8-LTB+IL7R+
RASGRP1	2.94487e-16	0.360004	0.459	0.223	3.937e-12	GBM.pembro.PBMC	RASGRP1	0.236	P11_CD4-CD8-LTB+IL7R+
FNBP1	2.26229e-18	0.359387	0.707	0.435	3.02446e-14	GBM.pembro.PBMC	FNBP1	0.272	P11_CD4-CD8-LTB+IL7R+
PDE4D	1.18703e-17	0.359243	0.429	0.196	1.58695e-13	GBM.pembro.PBMC	PDE4D	0.233	P11_CD4-CD8-LTB+IL7R+
RPAP2	7.50538e-12	0.358327	0.323	0.157	1.00339e-07	GBM.pembro.PBMC	RPAP2	0.166	P11_CD4-CD8-LTB+IL7R+
CWF19L2	1.52568e-19	0.355994	0.406	0.165	2.03969e-15	GBM.pembro.PBMC	CWF19L2	0.241	P11_CD4-CD8-LTB+IL7R+
STAG2	1.14372e-19	0.354803	0.494	0.231	1.52904e-15	GBM.pembro.PBMC	STAG2	0.263	P11_CD4-CD8-LTB+IL7R+
IER5	5.1679e-18	0.354192	0.323	0.118	6.90897e-14	GBM.pembro.PBMC	IER5	0.205	P11_CD4-CD8-LTB+IL7R+
USP34	1.89125e-18	0.353806	0.444	0.2	2.52841e-14	GBM.pembro.PBMC	USP34	0.244	P11_CD4-CD8-LTB+IL7R+
DDX39B	1.96413e-15	0.353351	0.348	0.151	2.62584e-11	GBM.pembro.PBMC	DDX39B	0.197	P11_CD4-CD8-LTB+IL7R+
HP1BP3	2.91312e-16	0.352948	0.663	0.416	3.89455e-12	GBM.pembro.PBMC	HP1BP3	0.247	P11_CD4-CD8-LTB+IL7R+
SLTM	4.22301e-19	0.35211	0.552	0.296	5.64575e-15	GBM.pembro.PBMC	SLTM	0.256	P11_CD4-CD8-LTB+IL7R+
DDX18	2.49998e-15	0.351823	0.589	0.362	3.34222e-11	GBM.pembro.PBMC	DDX18	0.227	P11_CD4-CD8-LTB+IL7R+
RIPOR2	3.49286e-23	0.350904	0.859	0.617	4.66961e-19	GBM.pembro.PBMC	RIPOR2	0.242	P11_CD4-CD8-LTB+IL7R+
ARFGEF1	1.88677e-15	0.350397	0.373	0.167	2.52243e-11	GBM.pembro.PBMC	ARFGEF1	0.206	P11_CD4-CD8-LTB+IL7R+
HSP90AA1	1.34368e-22	0.34826	0.955	0.781	1.79636e-18	GBM.pembro.PBMC	HSP90AA1	0.174	P11_CD4-CD8-LTB+IL7R+
SLC38A1	1.2621e-17	0.34707	0.638	0.38	1.6873e-13	GBM.pembro.PBMC	SLC38A1	0.258	P11_CD4-CD8-LTB+IL7R+
LRPPRC	3.47347e-14	0.346998	0.32	0.139	4.64369e-10	GBM.pembro.PBMC	LRPPRC	0.181	P11_CD4-CD8-LTB+IL7R+
KTN1	1.34762e-21	0.344896	0.628	0.326	1.80163e-17	GBM.pembro.PBMC	KTN1	0.302	P11_CD4-CD8-LTB+IL7R+
ATM	5.33825e-21	0.342994	0.736	0.468	7.13671e-17	GBM.pembro.PBMC	ATM	0.268	P11_CD4-CD8-LTB+IL7R+
SON	2.69713e-21	0.342781	0.892	0.674	3.60579e-17	GBM.pembro.PBMC	SON	0.218	P11_CD4-CD8-LTB+IL7R+
TM9SF3	8.3996e-24	0.34165	0.436	0.164	1.12294e-19	GBM.pembro.PBMC	TM9SF3	0.272	P11_CD4-CD8-LTB+IL7R+
MAP3K2	1.70569e-13	0.34112	0.307	0.129	2.28033e-09	GBM.pembro.PBMC	MAP3K2	0.178	P11_CD4-CD8-LTB+IL7R+
TTC37	4.31667e-14	0.341067	0.328	0.142	5.77095e-10	GBM.pembro.PBMC	TTC37	0.186	P11_CD4-CD8-LTB+IL7R+
SOS1	1.06522e-15	0.340678	0.302	0.113	1.42409e-11	GBM.pembro.PBMC	SOS1	0.189	P11_CD4-CD8-LTB+IL7R+
SRRM1	2.0559e-19	0.340635	0.764	0.512	2.74853e-15	GBM.pembro.PBMC	SRRM1	0.252	P11_CD4-CD8-LTB+IL7R+
MAP3K4	4.21802e-14	0.340082	0.271	0.105	5.63907e-10	GBM.pembro.PBMC	MAP3K4	0.166	P11_CD4-CD8-LTB+IL7R+
PJA2	7.48451e-16	0.33957	0.392	0.182	1.0006e-11	GBM.pembro.PBMC	PJA2	0.21	P11_CD4-CD8-LTB+IL7R+
DDX24	2.56103e-22	0.338582	0.742	0.455	3.42385e-18	GBM.pembro.PBMC	DDX24	0.287	P11_CD4-CD8-LTB+IL7R+
SUZ12	1.06797e-14	0.338447	0.341	0.152	1.42776e-10	GBM.pembro.PBMC	SUZ12	0.189	P11_CD4-CD8-LTB+IL7R+
PCNX1	2.93239e-14	0.338356	0.355	0.164	3.92032e-10	GBM.pembro.PBMC	PCNX1	0.191	P11_CD4-CD8-LTB+IL7R+
GOLGA8A	8.28452e-24	0.336981	0.325	0.092	1.10756e-19	GBM.pembro.PBMC	GOLGA8A	0.233	P11_CD4-CD8-LTB+IL7R+
ELK3	2.76183e-14	0.336828	0.381	0.185	3.69229e-10	GBM.pembro.PBMC	ELK3	0.196	P11_CD4-CD8-LTB+IL7R+
TRPM7	5.95674e-13	0.336709	0.256	0.098	7.96357e-09	GBM.pembro.PBMC	TRPM7	0.158	P11_CD4-CD8-LTB+IL7R+
TRIP12	1.77968e-17	0.3363	0.405	0.182	2.37926e-13	GBM.pembro.PBMC	TRIP12	0.223	P11_CD4-CD8-LTB+IL7R+
MDFIC	1.9659e-18	0.33604	0.469	0.216	2.62822e-14	GBM.pembro.PBMC	MDFIC	0.253	P11_CD4-CD8-LTB+IL7R+
PPP4R3A	1.96422e-16	0.335631	0.404	0.183	2.62597e-12	GBM.pembro.PBMC	PPP4R3A	0.221	P11_CD4-CD8-LTB+IL7R+
SCAF11	6.50002e-19	0.33535	0.701	0.421	8.68987e-15	GBM.pembro.PBMC	SCAF11	0.28	P11_CD4-CD8-LTB+IL7R+
JOSD1	7.19472e-18	0.334339	0.293	0.095	9.61863e-14	GBM.pembro.PBMC	JOSD1	0.198	P11_CD4-CD8-LTB+IL7R+
TOB1	8.09519e-18	0.334071	0.547	0.296	1.08225e-13	GBM.pembro.PBMC	TOB1	0.251	P11_CD4-CD8-LTB+IL7R+
SIK3	1.62048e-15	0.333285	0.281	0.101	2.16641e-11	GBM.pembro.PBMC	SIK3	0.18	P11_CD4-CD8-LTB+IL7R+
ATRX	2.93612e-17	0.333135	0.675	0.427	3.92529e-13	GBM.pembro.PBMC	ATRX	0.248	P11_CD4-CD8-LTB+IL7R+
SPTAN1	2.68077e-17	0.332697	0.554	0.304	3.58392e-13	GBM.pembro.PBMC	SPTAN1	0.25	P11_CD4-CD8-LTB+IL7R+
CD81	7.38742e-27	0.331131	0.631	0.283	9.87624e-23	GBM.pembro.PBMC	CD81	0.348	P11_CD4-CD8-LTB+IL7R+
ASCC3	1.3648e-14	0.329874	0.33	0.139	1.8246e-10	GBM.pembro.PBMC	ASCC3	0.191	P11_CD4-CD8-LTB+IL7R+
ZRANB2	2.54144e-14	0.329731	0.564	0.337	3.39765e-10	GBM.pembro.PBMC	ZRANB2	0.227	P11_CD4-CD8-LTB+IL7R+
VPS4B	3.65378e-15	0.328415	0.457	0.234	4.88474e-11	GBM.pembro.PBMC	VPS4B	0.223	P11_CD4-CD8-LTB+IL7R+
GPRIN3	3.50748e-12	0.326097	0.446	0.255	4.68915e-08	GBM.pembro.PBMC	GPRIN3	0.191	P11_CD4-CD8-LTB+IL7R+
AAK1	1.0643e-20	0.325126	0.737	0.473	1.42286e-16	GBM.pembro.PBMC	AAK1	0.264	P11_CD4-CD8-LTB+IL7R+
DYNLL2	2.69974e-13	0.324201	0.284	0.116	3.60928e-09	GBM.pembro.PBMC	DYNLL2	0.168	P11_CD4-CD8-LTB+IL7R+
ITGB1	1.71541e-13	0.324187	0.419	0.218	2.29333e-09	GBM.pembro.PBMC	ITGB1	0.201	P11_CD4-CD8-LTB+IL7R+
PRDM2	2.79606e-13	0.323463	0.359	0.172	3.73806e-09	GBM.pembro.PBMC	PRDM2	0.187	P11_CD4-CD8-LTB+IL7R+
IFITM1	5.19951e-67	1.87572	0.646	0.25	6.95123e-63	GBM.rec.PBMC	IFITM1	0.396	P11_CD4-CD8-LTB+IL7R+
S100A9	2.50724e-52	1.86357	0.638	0.258	3.35192e-48	GBM.rec.PBMC	S100A9	0.38	P11_CD4-CD8-LTB+IL7R+
LYZ	3.31348e-16	1.41449	0.372	0.185	4.4298e-12	GBM.rec.PBMC	LYZ	0.187	P11_CD4-CD8-LTB+IL7R+
S100A8	1.50464e-40	1.23141	0.454	0.133	2.01155e-36	GBM.rec.PBMC	S100A8	0.321	P11_CD4-CD8-LTB+IL7R+
GABARAP	4.39226e-45	1.07373	0.418	0.106	5.87201e-41	GBM.rec.PBMC	GABARAP	0.312	P11_CD4-CD8-LTB+IL7R+
PTPRCAP	3.03874e-64	1.03471	0.305	0.001	4.06249e-60	GBM.rec.PBMC	PTPRCAP	0.304	P11_CD4-CD8-LTB+IL7R+
ALDOA	1.57091e-43	0.973518	0.383	0.082	2.10014e-39	GBM.rec.PBMC	ALDOA	0.301	P11_CD4-CD8-LTB+IL7R+
ZFP36	1.3212e-07	0.928115	0.588	0.577	0.00176631	GBM.rec.PBMC	ZFP36	0.011	P11_CD4-CD8-LTB+IL7R+
CD74	2.78456e-20	0.857515	0.726	0.625	3.72268e-16	GBM.rec.PBMC	CD74	0.101	P11_CD4-CD8-LTB+IL7R+
NME2	1.03969e-55	0.854731	0.318	0.02	1.38996e-51	GBM.rec.PBMC	NME2	0.298	P11_CD4-CD8-LTB+IL7R+
IFITM3	3.38835e-34	0.789493	0.301	0.06	4.52989e-30	GBM.rec.PBMC	IFITM3	0.241	P11_CD4-CD8-LTB+IL7R+
MIF	6.68246e-25	0.75372	0.632	0.435	8.93379e-21	GBM.rec.PBMC	MIF	0.197	P11_CD4-CD8-LTB+IL7R+
PCBP2	5.51548e-19	0.693216	0.734	0.662	7.37365e-15	GBM.rec.PBMC	PCBP2	0.072	P11_CD4-CD8-LTB+IL7R+
PCBP1	8.85146e-23	0.688038	0.713	0.592	1.18335e-18	GBM.rec.PBMC	PCBP1	0.121	P11_CD4-CD8-LTB+IL7R+
CNN2	1.53235e-16	0.621033	0.655	0.554	2.0486e-12	GBM.rec.PBMC	CNN2	0.101	P11_CD4-CD8-LTB+IL7R+
SELPLG	2.33692e-18	0.573464	0.531	0.346	3.12422e-14	GBM.rec.PBMC	SELPLG	0.185	P11_CD4-CD8-LTB+IL7R+
ACTB	1.24185e-21	0.5728	0.969	0.996	1.66023e-17	GBM.rec.PBMC	ACTB	-0.027	P11_CD4-CD8-LTB+IL7R+
ZYX	1.29555e-14	0.554475	0.364	0.198	1.73202e-10	GBM.rec.PBMC	ZYX	0.166	P11_CD4-CD8-LTB+IL7R+
DUSP1	7.64515e-05	0.553775	0.705	0.74	1	GBM.rec.PBMC	DUSP1	-0.035	P11_CD4-CD8-LTB+IL7R+
FXYD5	3.47575e-13	0.551825	0.738	0.708	4.64672e-09	GBM.rec.PBMC	FXYD5	0.03	P11_CD4-CD8-LTB+IL7R+
FLT3LG	7.59437e-15	0.550747	0.448	0.269	1.01529e-10	GBM.rec.PBMC	FLT3LG	0.179	P11_CD4-CD8-LTB+IL7R+
HLA-B	5.58123e-32	0.53426	0.981	0.998	7.46154e-28	GBM.rec.PBMC	HLA-B	-0.017	P11_CD4-CD8-LTB+IL7R+
PSMB10	3.20593e-14	0.523441	0.406	0.227	4.286e-10	GBM.rec.PBMC	PSMB10	0.179	P11_CD4-CD8-LTB+IL7R+
ARF5	1.92629e-20	0.523114	0.452	0.223	2.57526e-16	GBM.rec.PBMC	ARF5	0.229	P11_CD4-CD8-LTB+IL7R+
CD3E	9.42976e-22	0.509792	0.839	0.88	1.26066e-17	GBM.rec.PBMC	CD3E	-0.041	P11_CD4-CD8-LTB+IL7R+
LAPTM5	1.48415e-14	0.503866	0.778	0.795	1.98416e-10	GBM.rec.PBMC	LAPTM5	-0.017	P11_CD4-CD8-LTB+IL7R+
DAZAP2	4.81606e-12	0.491225	0.644	0.548	6.43859e-08	GBM.rec.PBMC	DAZAP2	0.096	P11_CD4-CD8-LTB+IL7R+
PPDPF	2.23899e-17	0.488566	0.789	0.77	2.99331e-13	GBM.rec.PBMC	PPDPF	0.019	P11_CD4-CD8-LTB+IL7R+
RAB1B	1.12431e-12	0.467876	0.316	0.17	1.50309e-08	GBM.rec.PBMC	RAB1B	0.146	P11_CD4-CD8-LTB+IL7R+
RHOA	6.62771e-13	0.465943	0.741	0.688	8.86059e-09	GBM.rec.PBMC	RHOA	0.053	P11_CD4-CD8-LTB+IL7R+
TCIRG1	1.55657e-09	0.465224	0.28	0.153	2.08098e-05	GBM.rec.PBMC	TCIRG1	0.127	P11_CD4-CD8-LTB+IL7R+
EMD	7.90767e-12	0.460035	0.379	0.223	1.05718e-07	GBM.rec.PBMC	EMD	0.156	P11_CD4-CD8-LTB+IL7R+
HPS1	1.43382e-11	0.455297	0.305	0.158	1.91687e-07	GBM.rec.PBMC	HPS1	0.147	P11_CD4-CD8-LTB+IL7R+
XIST	1.56859e-10	0.452333	0.374	0.212	2.09705e-06	GBM.rec.PBMC	XIST	0.162	P11_CD4-CD8-LTB+IL7R+
CCND3	3.2169e-10	0.451784	0.634	0.544	4.30067e-06	GBM.rec.PBMC	CCND3	0.09	P11_CD4-CD8-LTB+IL7R+
EEF2	7.05597e-16	0.444674	0.856	0.918	9.43312e-12	GBM.rec.PBMC	EEF2	-0.062	P11_CD4-CD8-LTB+IL7R+
SF3A2	1.04134e-12	0.443039	0.305	0.15	1.39217e-08	GBM.rec.PBMC	SF3A2	0.155	P11_CD4-CD8-LTB+IL7R+
CD37	4.23776e-12	0.434493	0.791	0.75	5.66546e-08	GBM.rec.PBMC	CD37	0.041	P11_CD4-CD8-LTB+IL7R+
PSMA6	4.3106e-12	0.432871	0.274	0.132	5.76284e-08	GBM.rec.PBMC	PSMA6	0.142	P11_CD4-CD8-LTB+IL7R+
HLA-DPA1	9.69492e-05	0.428343	0.356	0.27	1	GBM.rec.PBMC	HLA-DPA1	0.086	P11_CD4-CD8-LTB+IL7R+
GPI	3.79019e-09	0.424138	0.339	0.212	5.06711e-05	GBM.rec.PBMC	GPI	0.127	P11_CD4-CD8-LTB+IL7R+
UCP2	3.35094e-10	0.413996	0.678	0.582	4.47987e-06	GBM.rec.PBMC	UCP2	0.096	P11_CD4-CD8-LTB+IL7R+
RPN1	7.08898e-11	0.402162	0.349	0.205	9.47725e-07	GBM.rec.PBMC	RPN1	0.144	P11_CD4-CD8-LTB+IL7R+
LPXN	7.41725e-07	0.40009	0.328	0.219	0.00991612	GBM.rec.PBMC	LPXN	0.109	P11_CD4-CD8-LTB+IL7R+
TOMM5	4.26079e-08	0.394393	0.28	0.166	0.000569625	GBM.rec.PBMC	TOMM5	0.114	P11_CD4-CD8-LTB+IL7R+
VIM	6.92851e-15	0.389973	0.887	0.876	9.26273e-11	GBM.rec.PBMC	VIM	0.011	P11_CD4-CD8-LTB+IL7R+
PTGER2	3.00011e-06	0.388851	0.479	0.383	0.0401085	GBM.rec.PBMC	PTGER2	0.096	P11_CD4-CD8-LTB+IL7R+
PPIA	1.9026e-11	0.388421	0.826	0.9	2.54359e-07	GBM.rec.PBMC	PPIA	-0.074	P11_CD4-CD8-LTB+IL7R+
SASH3	2.50033e-08	0.388193	0.36	0.246	0.00033427	GBM.rec.PBMC	SASH3	0.114	P11_CD4-CD8-LTB+IL7R+
FCMR	1.30595e-08	0.385756	0.437	0.325	0.000174593	GBM.rec.PBMC	FCMR	0.112	P11_CD4-CD8-LTB+IL7R+
RNF149	0.000277193	0.385076	0.4	0.323	1	GBM.rec.PBMC	RNF149	0.077	P11_CD4-CD8-LTB+IL7R+
KRTCAP2	4.71254e-10	0.381897	0.525	0.392	6.30019e-06	GBM.rec.PBMC	KRTCAP2	0.133	P11_CD4-CD8-LTB+IL7R+
DDOST	8.95863e-07	0.381805	0.441	0.338	0.0119768	GBM.rec.PBMC	DDOST	0.103	P11_CD4-CD8-LTB+IL7R+
LCP2	1.22358e-09	0.380849	0.55	0.42	1.6358e-05	GBM.rec.PBMC	LCP2	0.13	P11_CD4-CD8-LTB+IL7R+
SF3A1	1.38337e-08	0.378132	0.318	0.197	0.000184942	GBM.rec.PBMC	SF3A1	0.121	P11_CD4-CD8-LTB+IL7R+
HLA-DPB1	0.000980557	0.377305	0.37	0.294	1	GBM.rec.PBMC	HLA-DPB1	0.076	P11_CD4-CD8-LTB+IL7R+
PHB2	3.61635e-07	0.37636	0.483	0.377	0.00483469	GBM.rec.PBMC	PHB2	0.106	P11_CD4-CD8-LTB+IL7R+
RAC2	6.08108e-09	0.376311	0.753	0.783	8.1298e-05	GBM.rec.PBMC	RAC2	-0.03	P11_CD4-CD8-LTB+IL7R+
NCR3	0.000224199	0.376187	0.55	0.51	1	GBM.rec.PBMC	NCR3	0.04	P11_CD4-CD8-LTB+IL7R+
ARHGAP4	8.24163e-06	0.374719	0.385	0.292	0.110182	GBM.rec.PBMC	ARHGAP4	0.093	P11_CD4-CD8-LTB+IL7R+
R3HDM4	0.000201398	0.374059	0.27	0.191	1	GBM.rec.PBMC	R3HDM4	0.079	P11_CD4-CD8-LTB+IL7R+
SH2D2A	6.03807e-07	0.374042	0.341	0.237	0.0080723	GBM.rec.PBMC	SH2D2A	0.104	P11_CD4-CD8-LTB+IL7R+
HCLS1	8.77574e-07	0.373468	0.63	0.575	0.0117323	GBM.rec.PBMC	HCLS1	0.055	P11_CD4-CD8-LTB+IL7R+
ABHD14B	3.9251e-07	0.371589	0.333	0.22	0.00524747	GBM.rec.PBMC	ABHD14B	0.113	P11_CD4-CD8-LTB+IL7R+
PIM1	3.61521e-09	0.36773	0.548	0.413	4.83318e-05	GBM.rec.PBMC	PIM1	0.135	P11_CD4-CD8-LTB+IL7R+
CTSA	0.00130027	0.36729	0.362	0.297	1	GBM.rec.PBMC	CTSA	0.065	P11_CD4-CD8-LTB+IL7R+
CTSW	1.20268e-07	0.364403	0.753	0.795	0.00160786	GBM.rec.PBMC	CTSW	-0.042	P11_CD4-CD8-LTB+IL7R+
ZAP70	2.0995e-07	0.357783	0.477	0.373	0.00280682	GBM.rec.PBMC	ZAP70	0.104	P11_CD4-CD8-LTB+IL7R+
SHISA5	1.98625e-07	0.356142	0.406	0.296	0.00265542	GBM.rec.PBMC	SHISA5	0.11	P11_CD4-CD8-LTB+IL7R+
FLI1	1.0594e-07	0.35571	0.368	0.253	0.00141631	GBM.rec.PBMC	FLI1	0.115	P11_CD4-CD8-LTB+IL7R+
IFITM2	1.27157e-06	0.354279	0.728	0.708	0.0169996	GBM.rec.PBMC	IFITM2	0.02	P11_CD4-CD8-LTB+IL7R+
TRABD	2.61562e-05	0.352183	0.354	0.256	0.349682	GBM.rec.PBMC	TRABD	0.098	P11_CD4-CD8-LTB+IL7R+
PSAP	9.22105e-06	0.35167	0.5	0.402	0.123276	GBM.rec.PBMC	PSAP	0.098	P11_CD4-CD8-LTB+IL7R+
OTUB1	1.09953e-07	0.349765	0.351	0.233	0.00146996	GBM.rec.PBMC	OTUB1	0.118	P11_CD4-CD8-LTB+IL7R+
EEF1A1	1.2594e-28	0.347813	0.998	1	1.68369e-24	GBM.rec.PBMC	EEF1A1	-0.002	P11_CD4-CD8-LTB+IL7R+
PRF1	2.41625e-05	0.345692	0.697	0.674	0.323028	GBM.rec.PBMC	PRF1	0.023	P11_CD4-CD8-LTB+IL7R+
SEC61A1	1.08934e-05	0.33276	0.259	0.171	0.145634	GBM.rec.PBMC	SEC61A1	0.088	P11_CD4-CD8-LTB+IL7R+
PXN	7.14269e-07	0.330527	0.295	0.185	0.00954906	GBM.rec.PBMC	PXN	0.11	P11_CD4-CD8-LTB+IL7R+
GPSM3	8.63368e-06	0.326947	0.697	0.695	0.115424	GBM.rec.PBMC	GPSM3	0.002	P11_CD4-CD8-LTB+IL7R+
TSC22D4	1.16907e-08	0.326482	0.441	0.306	0.000156293	GBM.rec.PBMC	TSC22D4	0.135	P11_CD4-CD8-LTB+IL7R+
SLC9A3R1	3.51026e-05	0.324692	0.504	0.446	0.469286	GBM.rec.PBMC	SLC9A3R1	0.058	P11_CD4-CD8-LTB+IL7R+
GNLY	6.72368e-10	1.15896	0.564	0.368	8.98889e-06	HealthyDonor	GNLY	0.196	P11_CD4-CD8-LTB+IL7R+
IER2	1.31899e-21	0.987018	0.827	0.621	1.76336e-17	HealthyDonor	IER2	0.206	P11_CD4-CD8-LTB+IL7R+
JUN	8.67713e-13	0.924337	0.737	0.588	1.16005e-08	HealthyDonor	JUN	0.149	P11_CD4-CD8-LTB+IL7R+
TRBC1	1.66618e-13	0.905506	0.677	0.464	2.22751e-09	HealthyDonor	TRBC1	0.213	P11_CD4-CD8-LTB+IL7R+
NDUFA13	9.11569e-14	0.858548	0.549	0.338	1.21868e-09	HealthyDonor	NDUFA13	0.211	P11_CD4-CD8-LTB+IL7R+
GZMH	1.60689e-12	0.836725	0.459	0.214	2.14825e-08	HealthyDonor	GZMH	0.245	P11_CD4-CD8-LTB+IL7R+
CXCR4	9.3477e-24	0.774373	0.932	0.863	1.24969e-19	HealthyDonor	CXCR4	0.069	P11_CD4-CD8-LTB+IL7R+
DUSP2	2.85426e-17	0.770288	0.82	0.603	3.81586e-13	HealthyDonor	DUSP2	0.217	P11_CD4-CD8-LTB+IL7R+
ID2	2.60035e-18	0.762883	0.827	0.696	3.47641e-14	HealthyDonor	ID2	0.131	P11_CD4-CD8-LTB+IL7R+
LGALS1	1.29319e-06	0.754511	0.391	0.249	0.0172886	HealthyDonor	LGALS1	0.142	P11_CD4-CD8-LTB+IL7R+
NDUFB1	5.15275e-05	0.694332	0.459	0.409	0.688872	HealthyDonor	NDUFB1	0.05	P11_CD4-CD8-LTB+IL7R+
TRAC	4.3715e-15	0.675802	0.805	0.727	5.84426e-11	HealthyDonor	TRAC	0.078	P11_CD4-CD8-LTB+IL7R+
TMSB4X	6.64835e-52	0.672659	1	0.992	8.88818e-48	HealthyDonor	TMSB4X	0.008	P11_CD4-CD8-LTB+IL7R+
C1orf56	1.51149e-08	0.665331	0.361	0.188	0.000202071	HealthyDonor	C1orf56	0.173	P11_CD4-CD8-LTB+IL7R+
CRIP1	5.79074e-06	0.638063	0.429	0.311	0.0774165	HealthyDonor	CRIP1	0.118	P11_CD4-CD8-LTB+IL7R+
PFN1	4.97891e-27	0.626308	1	0.913	6.6563e-23	HealthyDonor	PFN1	0.087	P11_CD4-CD8-LTB+IL7R+
LAT	0.000205387	0.619864	0.474	0.431	1	HealthyDonor	LAT	0.043	P11_CD4-CD8-LTB+IL7R+
ARPC4	4.98015e-07	0.615568	0.474	0.368	0.00665796	HealthyDonor	ARPC4	0.106	P11_CD4-CD8-LTB+IL7R+
CCL5	9.28329e-23	0.597415	0.985	0.925	1.24108e-18	HealthyDonor	CCL5	0.06	P11_CD4-CD8-LTB+IL7R+
MAP3K8	0.000257669	0.593545	0.293	0.198	1	HealthyDonor	MAP3K8	0.095	P11_CD4-CD8-LTB+IL7R+
UBB	1.09306e-22	0.593279	0.925	0.856	1.46131e-18	HealthyDonor	UBB	0.069	P11_CD4-CD8-LTB+IL7R+
C12orf75	3.45791e-06	0.568269	0.511	0.439	0.0462288	HealthyDonor	C12orf75	0.072	P11_CD4-CD8-LTB+IL7R+
VAMP2	5.71251e-10	0.567179	0.654	0.571	7.63705e-06	HealthyDonor	VAMP2	0.083	P11_CD4-CD8-LTB+IL7R+
IL2RG	1.71704e-06	0.563795	0.579	0.538	0.0229551	HealthyDonor	IL2RG	0.041	P11_CD4-CD8-LTB+IL7R+
UQCR11	1.58825e-14	0.55708	0.812	0.698	2.12333e-10	HealthyDonor	UQCR11	0.114	P11_CD4-CD8-LTB+IL7R+
SVIP	0.00991247	0.550279	0.368	0.338	1	HealthyDonor	SVIP	0.03	P11_CD4-CD8-LTB+IL7R+
TMEM258	1.73215e-06	0.543605	0.624	0.603	0.0231572	HealthyDonor	TMEM258	0.021	P11_CD4-CD8-LTB+IL7R+
CHMP4A	0.00954108	0.534259	0.391	0.378	1	HealthyDonor	CHMP4A	0.013	P11_CD4-CD8-LTB+IL7R+
SNRPD2	3.60661e-10	0.525838	0.782	0.738	4.82168e-06	HealthyDonor	SNRPD2	0.044	P11_CD4-CD8-LTB+IL7R+
TMA7	6.30894e-15	0.523078	0.917	0.899	8.43442e-11	HealthyDonor	TMA7	0.018	P11_CD4-CD8-LTB+IL7R+
B2M	2.19377e-59	0.521246	1	1	2.93285e-55	HealthyDonor	B2M	0	P11_CD4-CD8-LTB+IL7R+
HLA-A	1.15431e-37	0.520622	1	0.984	1.5432e-33	HealthyDonor	HLA-A	0.016	P11_CD4-CD8-LTB+IL7R+
SEC61G	3.65501e-09	0.516102	0.669	0.621	4.88639e-05	HealthyDonor	SEC61G	0.048	P11_CD4-CD8-LTB+IL7R+
ARF6	2.93088e-07	0.513636	0.579	0.517	0.0039183	HealthyDonor	ARF6	0.062	P11_CD4-CD8-LTB+IL7R+
TAGLN2	1.44602e-05	0.512898	0.594	0.562	0.193319	HealthyDonor	TAGLN2	0.032	P11_CD4-CD8-LTB+IL7R+
GADD45B	0.000386639	0.508728	0.429	0.366	1	HealthyDonor	GADD45B	0.063	P11_CD4-CD8-LTB+IL7R+
CD52	6.9049e-19	0.508098	0.962	0.936	9.23116e-15	HealthyDonor	CD52	0.026	P11_CD4-CD8-LTB+IL7R+
TMED2	7.48313e-06	0.506717	0.481	0.382	0.100042	HealthyDonor	TMED2	0.099	P11_CD4-CD8-LTB+IL7R+
H3F3B	1.17308e-15	0.502845	0.947	0.943	1.5683e-11	HealthyDonor	H3F3B	0.004	P11_CD4-CD8-LTB+IL7R+
HLA-C	4.20137e-35	0.502779	1	0.973	5.61681e-31	HealthyDonor	HLA-C	0.027	P11_CD4-CD8-LTB+IL7R+
CST7	1.18177e-08	0.50158	0.835	0.771	0.00015799	HealthyDonor	CST7	0.064	P11_CD4-CD8-LTB+IL7R+
LY6E	2.40619e-06	0.492028	0.639	0.595	0.0321683	HealthyDonor	LY6E	0.044	P11_CD4-CD8-LTB+IL7R+
NDUFA3	0.00271606	0.484403	0.474	0.473	1	HealthyDonor	NDUFA3	0.001	P11_CD4-CD8-LTB+IL7R+
LSP1	1.36949e-06	0.478767	0.639	0.588	0.0183087	HealthyDonor	LSP1	0.051	P11_CD4-CD8-LTB+IL7R+
NKG7	1.25966e-15	0.473704	0.985	0.912	1.68403e-11	HealthyDonor	NKG7	0.073	P11_CD4-CD8-LTB+IL7R+
COX7A2	3.78067e-09	0.468653	0.737	0.727	5.05438e-05	HealthyDonor	COX7A2	0.01	P11_CD4-CD8-LTB+IL7R+
CD53	6.16654e-10	0.462674	0.737	0.647	8.24404e-06	HealthyDonor	CD53	0.09	P11_CD4-CD8-LTB+IL7R+
ATF6B	0.00781735	0.461281	0.308	0.26	1	HealthyDonor	ATF6B	0.048	P11_CD4-CD8-LTB+IL7R+
CMPK1	0.000388865	0.456141	0.451	0.396	1	HealthyDonor	CMPK1	0.055	P11_CD4-CD8-LTB+IL7R+
NDUFA11	0.00176649	0.453427	0.451	0.429	1	HealthyDonor	NDUFA11	0.022	P11_CD4-CD8-LTB+IL7R+
TMSB10	1.85142e-21	0.449167	1	0.98	2.47516e-17	HealthyDonor	TMSB10	0.02	P11_CD4-CD8-LTB+IL7R+
CALM2	0.000392847	0.447745	0.617	0.675	1	HealthyDonor	CALM2	-0.058	P11_CD4-CD8-LTB+IL7R+
HOPX	0.000259397	0.44234	0.571	0.536	1	HealthyDonor	HOPX	0.035	P11_CD4-CD8-LTB+IL7R+
EIF5A	0.000151271	0.442127	0.617	0.616	1	HealthyDonor	EIF5A	0.001	P11_CD4-CD8-LTB+IL7R+
MALAT1	7.12086e-27	0.432025	1	0.999	9.51988e-23	HealthyDonor	MALAT1	0.001	P11_CD4-CD8-LTB+IL7R+
POLR2L	0.00128921	0.424965	0.549	0.581	1	HealthyDonor	POLR2L	-0.032	P11_CD4-CD8-LTB+IL7R+
IL32	1.52383e-17	0.423416	1	0.959	2.03721e-13	HealthyDonor	IL32	0.041	P11_CD4-CD8-LTB+IL7R+
HCST	2.11611e-11	0.418778	0.94	0.92	2.82903e-07	HealthyDonor	HCST	0.02	P11_CD4-CD8-LTB+IL7R+
NDUFB8	0.000386484	0.418364	0.519	0.477	1	HealthyDonor	NDUFB8	0.042	P11_CD4-CD8-LTB+IL7R+
PRR13	0.000410623	0.416676	0.556	0.558	1	HealthyDonor	PRR13	-0.002	P11_CD4-CD8-LTB+IL7R+
OST4	1.704e-07	0.4141	0.842	0.843	0.00227808	HealthyDonor	OST4	-0.001	P11_CD4-CD8-LTB+IL7R+
HMGB2	0.00418425	0.402057	0.466	0.444	1	HealthyDonor	HMGB2	0.022	P11_CD4-CD8-LTB+IL7R+
TSC22D41	0.00950737	0.395727	0.383	0.352	1	HealthyDonor	TSC22D4	0.031	P11_CD4-CD8-LTB+IL7R+
COX7C	4.86666e-10	0.389586	0.925	0.903	6.50623e-06	HealthyDonor	COX7C	0.022	P11_CD4-CD8-LTB+IL7R+
ELOB	6.40711e-06	0.381296	0.699	0.735	0.0856566	HealthyDonor	ELOB	-0.036	P11_CD4-CD8-LTB+IL7R+
SS18L2	0.00589453	0.377487	0.376	0.348	1	HealthyDonor	SS18L2	0.028	P11_CD4-CD8-LTB+IL7R+
CD3D	1.01668e-06	0.374952	0.895	0.877	0.013592	HealthyDonor	CD3D	0.018	P11_CD4-CD8-LTB+IL7R+
CYBA	1.66761e-12	0.37473	0.947	0.923	2.22943e-08	HealthyDonor	CYBA	0.024	P11_CD4-CD8-LTB+IL7R+
COX6B1	0.000274846	0.374448	0.669	0.732	1	HealthyDonor	COX6B1	-0.063	P11_CD4-CD8-LTB+IL7R+
CD741	2.50175e-09	0.3702	0.774	0.649	3.34459e-05	HealthyDonor	CD74	0.125	P11_CD4-CD8-LTB+IL7R+
OAZ1	1.45354e-09	0.367882	0.887	0.911	1.94324e-05	HealthyDonor	OAZ1	-0.024	P11_CD4-CD8-LTB+IL7R+
SOD1	5.22277e-06	0.367861	0.654	0.649	0.0698232	HealthyDonor	SOD1	0.005	P11_CD4-CD8-LTB+IL7R+
EMP3	2.33824e-05	0.361664	0.812	0.85	0.312599	HealthyDonor	EMP3	-0.038	P11_CD4-CD8-LTB+IL7R+
LAMTOR4	0.00332878	0.361455	0.526	0.549	1	HealthyDonor	LAMTOR4	-0.023	P11_CD4-CD8-LTB+IL7R+
MYL12B	3.42319e-07	0.355641	0.82	0.842	0.00457646	HealthyDonor	MYL12B	-0.022	P11_CD4-CD8-LTB+IL7R+
UBC	1.16203e-13	0.351338	0.977	0.951	1.55352e-09	HealthyDonor	UBC	0.026	P11_CD4-CD8-LTB+IL7R+
PTMA	1.39972e-16	0.350341	1	0.981	1.87129e-12	HealthyDonor	PTMA	0.019	P11_CD4-CD8-LTB+IL7R+
UQCRB	5.49034e-08	0.344428	0.887	0.878	0.000734004	HealthyDonor	UQCRB	0.009	P11_CD4-CD8-LTB+IL7R+
FXYD51	1.71199e-07	0.340487	0.782	0.712	0.00228876	HealthyDonor	FXYD5	0.07	P11_CD4-CD8-LTB+IL7R+
S100A10	4.53301e-06	0.337773	0.835	0.827	0.0606019	HealthyDonor	S100A10	0.008	P11_CD4-CD8-LTB+IL7R+
S100A4	1.28453e-10	0.336566	0.985	0.972	1.71729e-06	HealthyDonor	S100A4	0.013	P11_CD4-CD8-LTB+IL7R+
CFL1	4.52871e-10	0.334272	0.962	0.93	6.05443e-06	HealthyDonor	CFL1	0.032	P11_CD4-CD8-LTB+IL7R+
JUNB	6.87427e-08	0.333919	0.895	0.825	0.000919021	HealthyDonor	JUNB	0.07	P11_CD4-CD8-LTB+IL7R+
GZMA	4.5738e-07	0.332146	0.917	0.887	0.00611471	HealthyDonor	GZMA	0.03	P11_CD4-CD8-LTB+IL7R+
ACTB1	1.35049e-14	0.330804	0.992	0.986	1.80548e-10	HealthyDonor	ACTB	0.006	P11_CD4-CD8-LTB+IL7R+
GPSM31	0.000231662	0.328415	0.677	0.698	1	HealthyDonor	GPSM3	-0.021	P11_CD4-CD8-LTB+IL7R+
LYAR	0.000351959	0.326302	0.692	0.711	1	HealthyDonor	LYAR	-0.019	P11_CD4-CD8-LTB+IL7R+
CHCHD2	1.93246e-05	0.322513	0.797	0.811	0.258351	HealthyDonor	CHCHD2	-0.014	P11_CD4-CD8-LTB+IL7R+
HIST1H1D	3.60024e-16	0.870846	0.403	0.191	4.81316e-12	GBM.pembro.PBMC	HIST1H1D	0.212	P12_CD4-CD8-XCL1+XCL2+
FAM107B	1.44676e-29	0.867062	0.585	0.277	1.93417e-25	GBM.pembro.PBMC	FAM107B	0.308	P12_CD4-CD8-XCL1+XCL2+
HIST1H1E	1.82882e-12	0.685818	0.564	0.394	2.44495e-08	GBM.pembro.PBMC	HIST1H1E	0.17	P12_CD4-CD8-XCL1+XCL2+
HIST2H2AC	3.73628e-17	0.64727	0.327	0.111	4.99504e-13	GBM.pembro.PBMC	HIST2H2AC	0.216	P12_CD4-CD8-XCL1+XCL2+
BRD7	6.5947e-19	0.624586	0.405	0.156	8.81646e-15	GBM.pembro.PBMC	BRD7	0.249	P12_CD4-CD8-XCL1+XCL2+
UTRN	6.46338e-21	0.624232	0.637	0.411	8.6409e-17	GBM.pembro.PBMC	UTRN	0.226	P12_CD4-CD8-XCL1+XCL2+
PRPF4B	2.53095e-21	0.622869	0.564	0.307	3.38363e-17	GBM.pembro.PBMC	PRPF4B	0.257	P12_CD4-CD8-XCL1+XCL2+
JUND	2.03621e-20	0.605912	0.608	0.334	2.72221e-16	GBM.pembro.PBMC	JUND	0.274	P12_CD4-CD8-XCL1+XCL2+
GOLGA8A	5.9643e-17	0.601355	0.287	0.082	7.97367e-13	GBM.pembro.PBMC	GOLGA8A	0.205	P12_CD4-CD8-XCL1+XCL2+
MYBL1	4.61947e-13	0.579379	0.338	0.146	6.17577e-09	GBM.pembro.PBMC	MYBL1	0.192	P12_CD4-CD8-XCL1+XCL2+
PIK3R1	1.04945e-18	0.574204	0.683	0.46	1.40301e-14	GBM.pembro.PBMC	PIK3R1	0.223	P12_CD4-CD8-XCL1+XCL2+
PHACTR2	9.69983e-12	0.549156	0.341	0.163	1.29677e-07	GBM.pembro.PBMC	PHACTR2	0.178	P12_CD4-CD8-XCL1+XCL2+
VPS13C	9.72452e-20	0.543115	0.572	0.3	1.30007e-15	GBM.pembro.PBMC	VPS13C	0.272	P12_CD4-CD8-XCL1+XCL2+
DDX3X	1.70724e-15	0.539801	0.623	0.446	2.28241e-11	GBM.pembro.PBMC	DDX3X	0.177	P12_CD4-CD8-XCL1+XCL2+
TUT4	6.87497e-14	0.521856	0.471	0.257	9.19115e-10	GBM.pembro.PBMC	TUT4	0.214	P12_CD4-CD8-XCL1+XCL2+
KLF13	2.62967e-15	0.517603	0.49	0.265	3.51561e-11	GBM.pembro.PBMC	KLF13	0.225	P12_CD4-CD8-XCL1+XCL2+
SRRM2	3.30751e-23	0.505619	0.75	0.498	4.42181e-19	GBM.pembro.PBMC	SRRM2	0.252	P12_CD4-CD8-XCL1+XCL2+
PARP14	2.25627e-12	0.500896	0.408	0.21	3.01641e-08	GBM.pembro.PBMC	PARP14	0.198	P12_CD4-CD8-XCL1+XCL2+
NEAT1	1.08658e-21	0.499905	0.827	0.676	1.45266e-17	GBM.pembro.PBMC	NEAT1	0.151	P12_CD4-CD8-XCL1+XCL2+
HIST1H1C	1.14633e-10	0.487045	0.312	0.141	1.53253e-06	GBM.pembro.PBMC	HIST1H1C	0.171	P12_CD4-CD8-XCL1+XCL2+
NKTR	8.70875e-14	0.481005	0.539	0.322	1.16427e-09	GBM.pembro.PBMC	NKTR	0.217	P12_CD4-CD8-XCL1+XCL2+
ZRANB2	1.47256e-12	0.478439	0.531	0.337	1.96866e-08	GBM.pembro.PBMC	ZRANB2	0.194	P12_CD4-CD8-XCL1+XCL2+
TLE4	3.24089e-11	0.474036	0.429	0.243	4.33274e-07	GBM.pembro.PBMC	TLE4	0.186	P12_CD4-CD8-XCL1+XCL2+
TRAPPC10	2.61854e-14	0.471215	0.345	0.146	3.50072e-10	GBM.pembro.PBMC	TRAPPC10	0.199	P12_CD4-CD8-XCL1+XCL2+
PPP1R9A	7.94497e-09	0.462709	0.308	0.166	0.000106216	GBM.pembro.PBMC	PPP1R9A	0.142	P12_CD4-CD8-XCL1+XCL2+
ATRX	3.53544e-12	0.460614	0.548	0.374	4.72653e-08	GBM.pembro.PBMC	ATRX	0.174	P12_CD4-CD8-XCL1+XCL2+
SET	3.62414e-23	0.460003	0.794	0.569	4.84511e-19	GBM.pembro.PBMC	SET	0.225	P12_CD4-CD8-XCL1+XCL2+
ARGLU1	2.95982e-21	0.45704	0.766	0.512	3.95698e-17	GBM.pembro.PBMC	ARGLU1	0.254	P12_CD4-CD8-XCL1+XCL2+
ARL4C	1.05253e-11	0.454474	0.758	0.651	1.40713e-07	GBM.pembro.PBMC	ARL4C	0.107	P12_CD4-CD8-XCL1+XCL2+
ETS1	2.0334e-14	0.452636	0.689	0.522	2.71845e-10	GBM.pembro.PBMC	ETS1	0.167	P12_CD4-CD8-XCL1+XCL2+
GCC2	9.05133e-11	0.434742	0.482	0.295	1.21007e-06	GBM.pembro.PBMC	GCC2	0.187	P12_CD4-CD8-XCL1+XCL2+
BOD1L1	2.74963e-11	0.434491	0.434	0.245	3.67599e-07	GBM.pembro.PBMC	BOD1L1	0.189	P12_CD4-CD8-XCL1+XCL2+
SFPQ	2.908e-15	0.433916	0.559	0.319	3.88771e-11	GBM.pembro.PBMC	SFPQ	0.24	P12_CD4-CD8-XCL1+XCL2+
PPP4R3A	1.99708e-11	0.432663	0.349	0.166	2.66989e-07	GBM.pembro.PBMC	PPP4R3A	0.183	P12_CD4-CD8-XCL1+XCL2+
TPR	4.5008e-11	0.432269	0.55	0.379	6.01712e-07	GBM.pembro.PBMC	TPR	0.171	P12_CD4-CD8-XCL1+XCL2+
PTPN12	7.54513e-09	0.431969	0.392	0.24	0.000100871	GBM.pembro.PBMC	PTPN12	0.152	P12_CD4-CD8-XCL1+XCL2+
ZFC3H1	1.88695e-11	0.431762	0.299	0.124	2.52266e-07	GBM.pembro.PBMC	ZFC3H1	0.175	P12_CD4-CD8-XCL1+XCL2+
ANKRD11	4.81233e-11	0.429863	0.503	0.322	6.4336e-07	GBM.pembro.PBMC	ANKRD11	0.181	P12_CD4-CD8-XCL1+XCL2+
SRRM1	6.38545e-15	0.427344	0.692	0.47	8.53671e-11	GBM.pembro.PBMC	SRRM1	0.222	P12_CD4-CD8-XCL1+XCL2+
RIPOR2	2.67925e-16	0.424318	0.768	0.631	3.58188e-12	GBM.pembro.PBMC	RIPOR2	0.137	P12_CD4-CD8-XCL1+XCL2+
VAV3	1.43342e-10	0.424153	0.41	0.23	1.91633e-06	GBM.pembro.PBMC	VAV3	0.18	P12_CD4-CD8-XCL1+XCL2+
NDUFA11	9.67832e-12	0.422841	0.475	0.272	1.29389e-07	GBM.pembro.PBMC	NDUFA11	0.203	P12_CD4-CD8-XCL1+XCL2+
PRKDC	1.70202e-09	0.422834	0.389	0.233	2.27543e-05	GBM.pembro.PBMC	PRKDC	0.156	P12_CD4-CD8-XCL1+XCL2+
GOLGB1	1.50541e-11	0.421596	0.386	0.198	2.01259e-07	GBM.pembro.PBMC	GOLGB1	0.188	P12_CD4-CD8-XCL1+XCL2+
MZT2B	1.34207e-15	0.419757	0.615	0.364	1.79421e-11	GBM.pembro.PBMC	MZT2B	0.251	P12_CD4-CD8-XCL1+XCL2+
RAB8B	3.81664e-10	0.417241	0.276	0.119	5.10247e-06	GBM.pembro.PBMC	RAB8B	0.157	P12_CD4-CD8-XCL1+XCL2+
SCAF11	3.12899e-12	0.414995	0.589	0.399	4.18315e-08	GBM.pembro.PBMC	SCAF11	0.19	P12_CD4-CD8-XCL1+XCL2+
ZC3H13	2.43118e-07	0.414697	0.364	0.235	0.00325025	GBM.pembro.PBMC	ZC3H13	0.129	P12_CD4-CD8-XCL1+XCL2+
SYNE1	1.17812e-07	0.412788	0.543	0.428	0.00157503	GBM.pembro.PBMC	SYNE1	0.115	P12_CD4-CD8-XCL1+XCL2+
EVA1B	1.53836e-08	0.41156	0.274	0.131	0.000205664	GBM.pembro.PBMC	EVA1B	0.143	P12_CD4-CD8-XCL1+XCL2+
IK	1.19206e-10	0.407754	0.521	0.339	1.59367e-06	GBM.pembro.PBMC	IK	0.182	P12_CD4-CD8-XCL1+XCL2+
FNBP1	8.83211e-08	0.407629	0.489	0.364	0.00118076	GBM.pembro.PBMC	FNBP1	0.125	P12_CD4-CD8-XCL1+XCL2+
AKT3	3.71923e-10	0.404737	0.306	0.141	4.97223e-06	GBM.pembro.PBMC	AKT3	0.165	P12_CD4-CD8-XCL1+XCL2+
EIF3J	2.73782e-09	0.404373	0.354	0.193	3.66019e-05	GBM.pembro.PBMC	EIF3J	0.161	P12_CD4-CD8-XCL1+XCL2+
EPB41	3.82238e-11	0.404125	0.532	0.349	5.11014e-07	GBM.pembro.PBMC	EPB41	0.183	P12_CD4-CD8-XCL1+XCL2+
CDV3	7.8202e-14	0.403473	0.442	0.23	1.04548e-09	GBM.pembro.PBMC	CDV3	0.212	P12_CD4-CD8-XCL1+XCL2+
PLCL2	2.88123e-09	0.39982	0.382	0.22	3.85192e-05	GBM.pembro.PBMC	PLCL2	0.162	P12_CD4-CD8-XCL1+XCL2+
QKI	1.63944e-09	0.39853	0.405	0.245	2.19177e-05	GBM.pembro.PBMC	QKI	0.16	P12_CD4-CD8-XCL1+XCL2+
NDUFB8	1.939e-18	0.398528	0.539	0.257	2.59225e-14	GBM.pembro.PBMC	NDUFB8	0.282	P12_CD4-CD8-XCL1+XCL2+
RNF19A	1.46129e-09	0.398133	0.307	0.153	1.9536e-05	GBM.pembro.PBMC	RNF19A	0.154	P12_CD4-CD8-XCL1+XCL2+
TM9SF3	1.07864e-09	0.39779	0.321	0.158	1.44204e-05	GBM.pembro.PBMC	TM9SF3	0.163	P12_CD4-CD8-XCL1+XCL2+
CREBRF	1.10697e-09	0.395381	0.332	0.176	1.47991e-05	GBM.pembro.PBMC	CREBRF	0.156	P12_CD4-CD8-XCL1+XCL2+
RORA	3.19925e-09	0.394286	0.265	0.114	4.27708e-05	GBM.pembro.PBMC	RORA	0.151	P12_CD4-CD8-XCL1+XCL2+
SETD2	6.59382e-08	0.389044	0.32	0.178	0.000881528	GBM.pembro.PBMC	SETD2	0.142	P12_CD4-CD8-XCL1+XCL2+
BDP1	6.92317e-08	0.388959	0.372	0.228	0.000925559	GBM.pembro.PBMC	BDP1	0.144	P12_CD4-CD8-XCL1+XCL2+
SUPT16H	3.50207e-09	0.388782	0.377	0.215	4.68192e-05	GBM.pembro.PBMC	SUPT16H	0.162	P12_CD4-CD8-XCL1+XCL2+
RBM26	7.65783e-09	0.386344	0.279	0.136	0.000102378	GBM.pembro.PBMC	RBM26	0.143	P12_CD4-CD8-XCL1+XCL2+
DDX21	9.36352e-10	0.385835	0.39	0.215	1.25181e-05	GBM.pembro.PBMC	DDX21	0.175	P12_CD4-CD8-XCL1+XCL2+
CEP350	1.07104e-08	0.383131	0.338	0.178	0.000143188	GBM.pembro.PBMC	CEP350	0.16	P12_CD4-CD8-XCL1+XCL2+
MACF1	1.02441e-08	0.381445	0.59	0.446	0.000136953	GBM.pembro.PBMC	MACF1	0.144	P12_CD4-CD8-XCL1+XCL2+
NDUFA13	3.1602e-13	0.380885	0.496	0.257	4.22487e-09	GBM.pembro.PBMC	NDUFA13	0.239	P12_CD4-CD8-XCL1+XCL2+
CDK13	2.91081e-07	0.379294	0.441	0.307	0.00389146	GBM.pembro.PBMC	CDK13	0.134	P12_CD4-CD8-XCL1+XCL2+
PHF3	3.91725e-09	0.378923	0.394	0.228	5.23697e-05	GBM.pembro.PBMC	PHF3	0.166	P12_CD4-CD8-XCL1+XCL2+
IL18R1	1.22752e-10	0.378292	0.49	0.302	1.64107e-06	GBM.pembro.PBMC	IL18R1	0.188	P12_CD4-CD8-XCL1+XCL2+
TMBIM4	5.73122e-11	0.377987	0.45	0.25	7.66207e-07	GBM.pembro.PBMC	TMBIM4	0.2	P12_CD4-CD8-XCL1+XCL2+
RRBP1	5.538e-08	0.376891	0.405	0.252	0.000740376	GBM.pembro.PBMC	RRBP1	0.153	P12_CD4-CD8-XCL1+XCL2+
USP34	2.40278e-09	0.376608	0.419	0.252	3.21227e-05	GBM.pembro.PBMC	USP34	0.167	P12_CD4-CD8-XCL1+XCL2+
ZBTB1	1.25333e-10	0.371865	0.299	0.134	1.67558e-06	GBM.pembro.PBMC	ZBTB1	0.165	P12_CD4-CD8-XCL1+XCL2+
GLS	4.71919e-11	0.37085	0.389	0.213	6.30909e-07	GBM.pembro.PBMC	GLS	0.176	P12_CD4-CD8-XCL1+XCL2+
TAOK3	4.68192e-09	0.369916	0.512	0.342	6.25926e-05	GBM.pembro.PBMC	TAOK3	0.17	P12_CD4-CD8-XCL1+XCL2+
KANSL1	1.48927e-09	0.369622	0.425	0.255	1.991e-05	GBM.pembro.PBMC	KANSL1	0.17	P12_CD4-CD8-XCL1+XCL2+
STK17A	5.84525e-13	0.369314	0.772	0.631	7.81451e-09	GBM.pembro.PBMC	STK17A	0.141	P12_CD4-CD8-XCL1+XCL2+
FAM111A	9.52179e-08	0.369186	0.284	0.151	0.00127297	GBM.pembro.PBMC	FAM111A	0.133	P12_CD4-CD8-XCL1+XCL2+
CD226	5.47786e-08	0.369167	0.389	0.24	0.000732335	GBM.pembro.PBMC	CD226	0.149	P12_CD4-CD8-XCL1+XCL2+
R3HDM2	4.22215e-11	0.369071	0.298	0.131	5.6446e-07	GBM.pembro.PBMC	R3HDM2	0.167	P12_CD4-CD8-XCL1+XCL2+
USP16	2.50476e-07	0.368738	0.338	0.205	0.00334862	GBM.pembro.PBMC	USP16	0.133	P12_CD4-CD8-XCL1+XCL2+
BPTF	9.32342e-10	0.367424	0.512	0.342	1.24645e-05	GBM.pembro.PBMC	BPTF	0.17	P12_CD4-CD8-XCL1+XCL2+
TAX1BP1	4.47646e-10	0.365549	0.54	0.366	5.98459e-06	GBM.pembro.PBMC	TAX1BP1	0.174	P12_CD4-CD8-XCL1+XCL2+
URI1	1.04799e-09	0.365171	0.349	0.176	1.40106e-05	GBM.pembro.PBMC	URI1	0.173	P12_CD4-CD8-XCL1+XCL2+
KAT6B	3.64826e-08	0.365077	0.369	0.223	0.000487736	GBM.pembro.PBMC	KAT6B	0.146	P12_CD4-CD8-XCL1+XCL2+
ARPC4	4.69363e-09	0.364626	0.479	0.302	6.27492e-05	GBM.pembro.PBMC	ARPC4	0.177	P12_CD4-CD8-XCL1+XCL2+
YTHDC1	1.9554e-09	0.363543	0.466	0.292	2.61418e-05	GBM.pembro.PBMC	YTHDC1	0.174	P12_CD4-CD8-XCL1+XCL2+
EFHD2	3.64245e-12	0.362624	0.665	0.48	4.86959e-08	GBM.pembro.PBMC	EFHD2	0.185	P12_CD4-CD8-XCL1+XCL2+
MALAT1	1.29062e-27	0.361816	1	1	1.72543e-23	GBM.pembro.PBMC	MALAT1	0	P12_CD4-CD8-XCL1+XCL2+
H1FX	3.28735e-05	0.361286	0.285	0.178	0.439485	GBM.pembro.PBMC	H1FX	0.107	P12_CD4-CD8-XCL1+XCL2+
STAG2	1.29221e-07	0.361035	0.42	0.277	0.00172756	GBM.pembro.PBMC	STAG2	0.143	P12_CD4-CD8-XCL1+XCL2+
RBM25	3.0533e-09	0.360293	0.62	0.46	4.08195e-05	GBM.pembro.PBMC	RBM25	0.16	P12_CD4-CD8-XCL1+XCL2+
PCM1	8.07082e-09	0.35932	0.475	0.319	0.000107899	GBM.pembro.PBMC	PCM1	0.156	P12_CD4-CD8-XCL1+XCL2+
PIP4K2A	8.86578e-13	0.356607	0.596	0.347	1.18527e-08	GBM.pembro.PBMC	PIP4K2A	0.249	P12_CD4-CD8-XCL1+XCL2+
SON	1.45845e-14	0.356216	0.806	0.666	1.94981e-10	GBM.pembro.PBMC	SON	0.14	P12_CD4-CD8-XCL1+XCL2+
SLTM	1.41745e-09	0.356201	0.483	0.304	1.89499e-05	GBM.pembro.PBMC	SLTM	0.179	P12_CD4-CD8-XCL1+XCL2+
VPS4B	9.56791e-08	0.354945	0.383	0.233	0.00127913	GBM.pembro.PBMC	VPS4B	0.15	P12_CD4-CD8-XCL1+XCL2+
CCNL1	1.59856e-13	0.353292	0.668	0.475	2.13711e-09	GBM.pembro.PBMC	CCNL1	0.193	P12_CD4-CD8-XCL1+XCL2+
DDX46	1.55871e-08	0.353197	0.564	0.401	0.000208384	GBM.pembro.PBMC	DDX46	0.163	P12_CD4-CD8-XCL1+XCL2+
KIF5B	1.09748e-08	0.3523	0.404	0.243	0.000146722	GBM.pembro.PBMC	KIF5B	0.161	P12_CD4-CD8-XCL1+XCL2+
EIF3A	8.67261e-10	0.351716	0.483	0.317	1.15944e-05	GBM.pembro.PBMC	EIF3A	0.166	P12_CD4-CD8-XCL1+XCL2+
DHX9	7.76634e-07	0.351578	0.282	0.158	0.0103828	GBM.pembro.PBMC	DHX9	0.124	P12_CD4-CD8-XCL1+XCL2+
SPECC1	4.12061e-06	0.351203	0.265	0.153	0.0550884	GBM.pembro.PBMC	SPECC1	0.112	P12_CD4-CD8-XCL1+XCL2+
CCDC66	2.6623e-08	0.350839	0.261	0.124	0.000355923	GBM.pembro.PBMC	CCDC66	0.137	P12_CD4-CD8-XCL1+XCL2+
NDUFC2	3.45418e-14	0.350692	0.478	0.252	4.61789e-10	GBM.pembro.PBMC	NDUFC2	0.226	P12_CD4-CD8-XCL1+XCL2+
PNN	4.96308e-11	0.350287	0.676	0.522	6.63514e-07	GBM.pembro.PBMC	PNN	0.154	P12_CD4-CD8-XCL1+XCL2+
ABHD17A	4.49877e-09	0.349306	0.549	0.381	6.0144e-05	GBM.pembro.PBMC	ABHD17A	0.168	P12_CD4-CD8-XCL1+XCL2+
MINOS1	1.38215e-11	0.348504	0.387	0.186	1.84779e-07	GBM.pembro.PBMC	MINOS1	0.201	P12_CD4-CD8-XCL1+XCL2+
RB1CC1	3.62998e-07	0.347481	0.317	0.181	0.00485293	GBM.pembro.PBMC	RB1CC1	0.136	P12_CD4-CD8-XCL1+XCL2+
AAK1	1.12211e-09	0.346643	0.522	0.351	1.50015e-05	GBM.pembro.PBMC	AAK1	0.171	P12_CD4-CD8-XCL1+XCL2+
PJA2	2.3642e-09	0.346437	0.425	0.25	3.1607e-05	GBM.pembro.PBMC	PJA2	0.175	P12_CD4-CD8-XCL1+XCL2+
SLC39A10	2.82392e-08	0.344385	0.331	0.181	0.00037753	GBM.pembro.PBMC	SLC39A10	0.15	P12_CD4-CD8-XCL1+XCL2+
DDX24	3.07536e-09	0.342189	0.569	0.408	4.11145e-05	GBM.pembro.PBMC	DDX24	0.161	P12_CD4-CD8-XCL1+XCL2+
RFC1	3.31408e-08	0.341984	0.363	0.208	0.000443059	GBM.pembro.PBMC	RFC1	0.155	P12_CD4-CD8-XCL1+XCL2+
CUL3	1.49641e-07	0.341939	0.297	0.161	0.00200055	GBM.pembro.PBMC	CUL3	0.136	P12_CD4-CD8-XCL1+XCL2+
WHAMM	2.96085e-06	0.340939	0.335	0.215	0.0395836	GBM.pembro.PBMC	WHAMM	0.12	P12_CD4-CD8-XCL1+XCL2+
ZC3H7A	2.26621e-06	0.3385	0.251	0.134	0.0302969	GBM.pembro.PBMC	ZC3H7A	0.117	P12_CD4-CD8-XCL1+XCL2+
KLF2	9.05422e-10	0.337755	0.716	0.594	1.21046e-05	GBM.pembro.PBMC	KLF2	0.122	P12_CD4-CD8-XCL1+XCL2+
SMC5	3.45472e-07	0.337481	0.341	0.198	0.00461862	GBM.pembro.PBMC	SMC5	0.143	P12_CD4-CD8-XCL1+XCL2+
BLOC1S1	3.97847e-07	0.335643	0.409	0.267	0.00531882	GBM.pembro.PBMC	BLOC1S1	0.142	P12_CD4-CD8-XCL1+XCL2+
HSP90AA1	1.99571e-14	0.335537	0.837	0.713	2.66807e-10	GBM.pembro.PBMC	HSP90AA1	0.124	P12_CD4-CD8-XCL1+XCL2+
SOS2	5.2543e-11	0.334864	0.28	0.114	7.02447e-07	GBM.pembro.PBMC	SOS2	0.166	P12_CD4-CD8-XCL1+XCL2+
RNMT	2.50608e-09	0.333955	0.359	0.191	3.35037e-05	GBM.pembro.PBMC	RNMT	0.168	P12_CD4-CD8-XCL1+XCL2+
MIS18BP1	2.58736e-09	0.332328	0.349	0.183	3.45904e-05	GBM.pembro.PBMC	MIS18BP1	0.166	P12_CD4-CD8-XCL1+XCL2+
KIAA1109	1.20799e-06	0.331742	0.262	0.139	0.0161496	GBM.pembro.PBMC	KIAA1109	0.123	P12_CD4-CD8-XCL1+XCL2+
SMARCA5	2.07115e-07	0.331334	0.373	0.23	0.00276892	GBM.pembro.PBMC	SMARCA5	0.143	P12_CD4-CD8-XCL1+XCL2+
RIOK3	1.89845e-05	0.33102	0.352	0.245	0.253804	GBM.pembro.PBMC	RIOK3	0.107	P12_CD4-CD8-XCL1+XCL2+
XRN1	9.21135e-06	0.33097	0.34	0.22	0.123147	GBM.pembro.PBMC	XRN1	0.12	P12_CD4-CD8-XCL1+XCL2+
CYLD	3.65095e-08	0.329297	0.48	0.319	0.000488096	GBM.pembro.PBMC	CYLD	0.161	P12_CD4-CD8-XCL1+XCL2+
MIA3	7.35383e-07	0.329053	0.261	0.139	0.00983133	GBM.pembro.PBMC	MIA3	0.122	P12_CD4-CD8-XCL1+XCL2+
KMT2A	6.24782e-06	0.32811	0.358	0.24	0.0835271	GBM.pembro.PBMC	KMT2A	0.118	P12_CD4-CD8-XCL1+XCL2+
LNPEP	5.48908e-06	0.326745	0.448	0.327	0.0733835	GBM.pembro.PBMC	LNPEP	0.121	P12_CD4-CD8-XCL1+XCL2+
SMC3	7.08313e-07	0.322027	0.364	0.235	0.00946944	GBM.pembro.PBMC	SMC3	0.129	P12_CD4-CD8-XCL1+XCL2+
IFITM1	2.3696e-72	2.03562	0.834	0.389	3.16792e-68	GBM.rec.PBMC	IFITM1	0.445	P12_CD4-CD8-XCL1+XCL2+
S100A9	6.12501e-27	1.5471	0.5	0.178	8.18852e-23	GBM.rec.PBMC	S100A9	0.322	P12_CD4-CD8-XCL1+XCL2+
S100A8	2.46117e-25	1.17609	0.421	0.13	3.29034e-21	GBM.rec.PBMC	S100A8	0.291	P12_CD4-CD8-XCL1+XCL2+
GABARAP	6.36751e-56	1.16151	0.53	0.116	8.51272e-52	GBM.rec.PBMC	GABARAP	0.414	P12_CD4-CD8-XCL1+XCL2+
LYZ	7.06208e-07	1.09346	0.301	0.169	0.00944129	GBM.rec.PBMC	LYZ	0.132	P12_CD4-CD8-XCL1+XCL2+
NME2	2.74309e-64	1.05076	0.401	0.029	3.66724e-60	GBM.rec.PBMC	NME2	0.372	P12_CD4-CD8-XCL1+XCL2+
MIF	2.88917e-45	0.95909	0.765	0.369	3.86253e-41	GBM.rec.PBMC	MIF	0.396	P12_CD4-CD8-XCL1+XCL2+
COTL1	5.49817e-34	0.85888	0.818	0.52	7.35051e-30	GBM.rec.PBMC	COTL1	0.298	P12_CD4-CD8-XCL1+XCL2+
CD74	5.19719e-23	0.832447	0.864	0.786	6.94813e-19	GBM.rec.PBMC	CD74	0.078	P12_CD4-CD8-XCL1+XCL2+
ZFP36L2	4.58366e-49	0.819919	0.967	0.867	6.12789e-45	GBM.rec.PBMC	ZFP36L2	0.1	P12_CD4-CD8-XCL1+XCL2+
IL7R	8.3022e-28	0.809146	0.788	0.522	1.10992e-23	GBM.rec.PBMC	IL7R	0.266	P12_CD4-CD8-XCL1+XCL2+
FKBP5	1.02906e-26	0.791095	0.407	0.13	1.37575e-22	GBM.rec.PBMC	FKBP5	0.277	P12_CD4-CD8-XCL1+XCL2+
KIR2DL4	3.12611e-21	0.786453	0.477	0.211	4.1793e-17	GBM.rec.PBMC	KIR2DL4	0.266	P12_CD4-CD8-XCL1+XCL2+
ALDOA	1.3972e-32	0.731986	0.338	0.067	1.86791e-28	GBM.rec.PBMC	ALDOA	0.271	P12_CD4-CD8-XCL1+XCL2+
IFITM3	3.45451e-21	0.729322	0.752	0.536	4.61834e-17	GBM.rec.PBMC	IFITM3	0.216	P12_CD4-CD8-XCL1+XCL2+
ARF5	2.46009e-29	0.718502	0.513	0.18	3.28889e-25	GBM.rec.PBMC	ARF5	0.333	P12_CD4-CD8-XCL1+XCL2+
PCBP2	8.64399e-26	0.715664	0.775	0.596	1.15562e-21	GBM.rec.PBMC	PCBP2	0.179	P12_CD4-CD8-XCL1+XCL2+
PSMB10	7.92614e-22	0.71442	0.566	0.289	1.05965e-17	GBM.rec.PBMC	PSMB10	0.277	P12_CD4-CD8-XCL1+XCL2+
XIST	3.58024e-23	0.698057	0.464	0.171	4.78642e-19	GBM.rec.PBMC	XIST	0.293	P12_CD4-CD8-XCL1+XCL2+
IGFBP4	2.7718e-14	0.687945	0.387	0.188	3.70562e-10	GBM.rec.PBMC	IGFBP4	0.199	P12_CD4-CD8-XCL1+XCL2+
PCBP1	1.33974e-28	0.680703	0.795	0.555	1.7911e-24	GBM.rec.PBMC	PCBP1	0.24	P12_CD4-CD8-XCL1+XCL2+
TCIRG1	9.27262e-24	0.670636	0.51	0.218	1.23966e-19	GBM.rec.PBMC	TCIRG1	0.292	P12_CD4-CD8-XCL1+XCL2+
RAB24	3.22694e-31	0.666799	0.334	0.068	4.3141e-27	GBM.rec.PBMC	RAB24	0.266	P12_CD4-CD8-XCL1+XCL2+
ZYX	5.48358e-24	0.654226	0.401	0.136	7.331e-20	GBM.rec.PBMC	ZYX	0.265	P12_CD4-CD8-XCL1+XCL2+
PPDPF	1.93347e-18	0.64025	0.752	0.567	2.58486e-14	GBM.rec.PBMC	PPDPF	0.185	P12_CD4-CD8-XCL1+XCL2+
SPTSSB	2.62028e-25	0.63616	0.699	0.386	3.50305e-21	GBM.rec.PBMC	SPTSSB	0.313	P12_CD4-CD8-XCL1+XCL2+
SLC1A5	1.455e-19	0.614586	0.278	0.079	1.94518e-15	GBM.rec.PBMC	SLC1A5	0.199	P12_CD4-CD8-XCL1+XCL2+
PXN	5.95135e-17	0.614221	0.447	0.212	7.95636e-13	GBM.rec.PBMC	PXN	0.235	P12_CD4-CD8-XCL1+XCL2+
CNN2	8.94667e-16	0.594365	0.603	0.363	1.19608e-11	GBM.rec.PBMC	CNN2	0.24	P12_CD4-CD8-XCL1+XCL2+
PTGER2	1.01902e-19	0.593585	0.503	0.231	1.36233e-15	GBM.rec.PBMC	PTGER2	0.272	P12_CD4-CD8-XCL1+XCL2+
EMD	1.47513e-19	0.587379	0.391	0.15	1.9721e-15	GBM.rec.PBMC	EMD	0.241	P12_CD4-CD8-XCL1+XCL2+
RAB1B	2.09172e-17	0.576926	0.394	0.17	2.79642e-13	GBM.rec.PBMC	RAB1B	0.224	P12_CD4-CD8-XCL1+XCL2+
DAZAP2	1.81159e-23	0.568291	0.775	0.504	2.42191e-19	GBM.rec.PBMC	DAZAP2	0.271	P12_CD4-CD8-XCL1+XCL2+
RHOA	1.60841e-20	0.549544	0.815	0.592	2.15028e-16	GBM.rec.PBMC	RHOA	0.223	P12_CD4-CD8-XCL1+XCL2+
DUSP2	4.42623e-10	0.544037	0.765	0.641	5.91743e-06	GBM.rec.PBMC	DUSP2	0.124	P12_CD4-CD8-XCL1+XCL2+
EEF2	3.00003e-23	0.536803	0.921	0.849	4.01074e-19	GBM.rec.PBMC	EEF2	0.072	P12_CD4-CD8-XCL1+XCL2+
TSC22D3	8.97206e-13	0.532942	0.834	0.724	1.19947e-08	GBM.rec.PBMC	TSC22D3	0.11	P12_CD4-CD8-XCL1+XCL2+
GLUL	2.17107e-13	0.532648	0.318	0.133	2.9025e-09	GBM.rec.PBMC	GLUL	0.185	P12_CD4-CD8-XCL1+XCL2+
RPN1	2.34297e-13	0.526481	0.315	0.135	3.13231e-09	GBM.rec.PBMC	RPN1	0.18	P12_CD4-CD8-XCL1+XCL2+
CCND3	6.15835e-19	0.517405	0.801	0.568	8.23309e-15	GBM.rec.PBMC	CCND3	0.233	P12_CD4-CD8-XCL1+XCL2+
EEF1A1	1.31103e-41	0.509782	0.997	1	1.75271e-37	GBM.rec.PBMC	EEF1A1	-0.003	P12_CD4-CD8-XCL1+XCL2+
ACTB	9.48289e-19	0.507015	0.977	0.984	1.26777e-14	GBM.rec.PBMC	ACTB	-0.007	P12_CD4-CD8-XCL1+XCL2+
ZAP70	9.73968e-13	0.50585	0.563	0.348	1.3021e-08	GBM.rec.PBMC	ZAP70	0.215	P12_CD4-CD8-XCL1+XCL2+
SYNGR2	3.67359e-13	0.497663	0.291	0.113	4.91123e-09	GBM.rec.PBMC	SYNGR2	0.178	P12_CD4-CD8-XCL1+XCL2+
FLNA	1.55392e-12	0.495444	0.662	0.45	2.07743e-08	GBM.rec.PBMC	FLNA	0.212	P12_CD4-CD8-XCL1+XCL2+
PSMA6	2.21409e-18	0.492651	0.315	0.104	2.96002e-14	GBM.rec.PBMC	PSMA6	0.211	P12_CD4-CD8-XCL1+XCL2+
GAPDH	7.05342e-16	0.482221	0.907	0.876	9.42972e-12	GBM.rec.PBMC	GAPDH	0.031	P12_CD4-CD8-XCL1+XCL2+
VIM	2.76554e-10	0.469484	0.795	0.586	3.69725e-06	GBM.rec.PBMC	VIM	0.209	P12_CD4-CD8-XCL1+XCL2+
PTDSS1	2.21889e-14	0.468979	0.308	0.115	2.96643e-10	GBM.rec.PBMC	PTDSS1	0.193	P12_CD4-CD8-XCL1+XCL2+
ARL5A	1.10088e-12	0.467529	0.275	0.106	1.47176e-08	GBM.rec.PBMC	ARL5A	0.169	P12_CD4-CD8-XCL1+XCL2+
TKT	1.04889e-06	0.462953	0.377	0.223	0.0140226	GBM.rec.PBMC	TKT	0.154	P12_CD4-CD8-XCL1+XCL2+
CCNI	7.35511e-21	0.460209	0.864	0.701	9.83304e-17	GBM.rec.PBMC	CCNI	0.163	P12_CD4-CD8-XCL1+XCL2+
OTUB1	5.684e-10	0.458745	0.421	0.231	7.59895e-06	GBM.rec.PBMC	OTUB1	0.19	P12_CD4-CD8-XCL1+XCL2+
WASHC1	2.38632e-14	0.457217	0.268	0.092	3.19027e-10	GBM.rec.PBMC	WASHC1	0.176	P12_CD4-CD8-XCL1+XCL2+
FLI1	4.46297e-14	0.456267	0.51	0.283	5.96655e-10	GBM.rec.PBMC	FLI1	0.227	P12_CD4-CD8-XCL1+XCL2+
FGR	4.1306e-07	0.447705	0.5	0.346	0.0055222	GBM.rec.PBMC	FGR	0.154	P12_CD4-CD8-XCL1+XCL2+
CTSW	1.65587e-20	0.445982	0.937	0.979	2.21374e-16	GBM.rec.PBMC	CTSW	-0.042	P12_CD4-CD8-XCL1+XCL2+
PSTPIP1	2.5591e-09	0.441353	0.421	0.242	3.42126e-05	GBM.rec.PBMC	PSTPIP1	0.179	P12_CD4-CD8-XCL1+XCL2+
NFATC2	2.43321e-10	0.44128	0.351	0.177	3.25295e-06	GBM.rec.PBMC	NFATC2	0.174	P12_CD4-CD8-XCL1+XCL2+
NDUFV1	7.74546e-14	0.439159	0.457	0.234	1.03549e-09	GBM.rec.PBMC	NDUFV1	0.223	P12_CD4-CD8-XCL1+XCL2+
SELENOW	4.00113e-10	0.436617	0.533	0.342	5.34911e-06	GBM.rec.PBMC	SELENOW	0.191	P12_CD4-CD8-XCL1+XCL2+
UCP2	1.18049e-11	0.43572	0.818	0.667	1.5782e-07	GBM.rec.PBMC	UCP2	0.151	P12_CD4-CD8-XCL1+XCL2+
TMC8	7.76625e-11	0.435437	0.474	0.272	1.03827e-06	GBM.rec.PBMC	TMC8	0.202	P12_CD4-CD8-XCL1+XCL2+
XCL1	7.43989e-10	0.424885	0.791	0.667	9.94639e-06	GBM.rec.PBMC	XCL1	0.124	P12_CD4-CD8-XCL1+XCL2+
PPIA	5.64847e-14	0.421654	0.887	0.843	7.55144e-10	GBM.rec.PBMC	PPIA	0.044	P12_CD4-CD8-XCL1+XCL2+
KRTCAP2	1.01672e-10	0.413609	0.427	0.225	1.35926e-06	GBM.rec.PBMC	KRTCAP2	0.202	P12_CD4-CD8-XCL1+XCL2+
CST3	1.98441e-06	0.411676	0.341	0.204	0.0265296	GBM.rec.PBMC	CST3	0.137	P12_CD4-CD8-XCL1+XCL2+
FXYD5	4.95398e-11	0.40781	0.841	0.767	6.62297e-07	GBM.rec.PBMC	FXYD5	0.074	P12_CD4-CD8-XCL1+XCL2+
TOMM5	3.23125e-14	0.406274	0.308	0.116	4.31986e-10	GBM.rec.PBMC	TOMM5	0.192	P12_CD4-CD8-XCL1+XCL2+
ARHGAP4	4.74305e-10	0.405819	0.371	0.196	6.34098e-06	GBM.rec.PBMC	ARHGAP4	0.175	P12_CD4-CD8-XCL1+XCL2+
HIGD2A	7.98214e-08	0.405647	0.576	0.399	0.00106713	GBM.rec.PBMC	HIGD2A	0.177	P12_CD4-CD8-XCL1+XCL2+
RAC2	9.31501e-12	0.404975	0.828	0.753	1.24532e-07	GBM.rec.PBMC	RAC2	0.075	P12_CD4-CD8-XCL1+XCL2+
DUSP1	2.70052e-08	0.403845	0.705	0.561	0.000361032	GBM.rec.PBMC	DUSP1	0.144	P12_CD4-CD8-XCL1+XCL2+
PPA1	4.5904e-11	0.401057	0.417	0.224	6.1369e-07	GBM.rec.PBMC	PPA1	0.193	P12_CD4-CD8-XCL1+XCL2+
CLASP1	7.1141e-09	0.396697	0.374	0.209	9.51084e-05	GBM.rec.PBMC	CLASP1	0.165	P12_CD4-CD8-XCL1+XCL2+
AGTRAP	1.09246e-08	0.394929	0.288	0.138	0.000146051	GBM.rec.PBMC	AGTRAP	0.15	P12_CD4-CD8-XCL1+XCL2+
C19orf66	7.45546e-06	0.394751	0.374	0.237	0.0996721	GBM.rec.PBMC	C19orf66	0.137	P12_CD4-CD8-XCL1+XCL2+
SCML4	3.87279e-08	0.392979	0.305	0.162	0.000517754	GBM.rec.PBMC	SCML4	0.143	P12_CD4-CD8-XCL1+XCL2+
SDF4	2.10895e-11	0.390602	0.51	0.301	2.81945e-07	GBM.rec.PBMC	SDF4	0.209	P12_CD4-CD8-XCL1+XCL2+
TRBC2	8.0615e-08	0.390019	0.629	0.445	0.00107774	GBM.rec.PBMC	TRBC2	0.184	P12_CD4-CD8-XCL1+XCL2+
CD7	1.8033e-10	0.389172	0.894	0.915	2.41083e-06	GBM.rec.PBMC	CD7	-0.021	P12_CD4-CD8-XCL1+XCL2+
DDIT4	3.34759e-06	0.386433	0.692	0.582	0.044754	GBM.rec.PBMC	DDIT4	0.11	P12_CD4-CD8-XCL1+XCL2+
CD8A	1.07485e-06	0.384156	0.255	0.135	0.0143696	GBM.rec.PBMC	CD8A	0.12	P12_CD4-CD8-XCL1+XCL2+
AUP1	8.53629e-11	0.383526	0.434	0.228	1.14122e-06	GBM.rec.PBMC	AUP1	0.206	P12_CD4-CD8-XCL1+XCL2+
PPIB	3.90768e-13	0.382676	0.801	0.646	5.22418e-09	GBM.rec.PBMC	PPIB	0.155	P12_CD4-CD8-XCL1+XCL2+
MEA1	2.31152e-13	0.382034	0.318	0.126	3.09027e-09	GBM.rec.PBMC	MEA1	0.192	P12_CD4-CD8-XCL1+XCL2+
PTGDR	1.18609e-10	0.381924	0.646	0.442	1.58569e-06	GBM.rec.PBMC	PTGDR	0.204	P12_CD4-CD8-XCL1+XCL2+
HPS1	7.38798e-07	0.37916	0.288	0.163	0.009877	GBM.rec.PBMC	HPS1	0.125	P12_CD4-CD8-XCL1+XCL2+
ACTG1	1.23932e-11	0.37906	0.934	0.895	1.65685e-07	GBM.rec.PBMC	ACTG1	0.039	P12_CD4-CD8-XCL1+XCL2+
CD55	6.79971e-07	0.37867	0.56	0.415	0.00909054	GBM.rec.PBMC	CD55	0.145	P12_CD4-CD8-XCL1+XCL2+
SH2D1B	4.64238e-09	0.37814	0.503	0.319	6.20639e-05	GBM.rec.PBMC	SH2D1B	0.184	P12_CD4-CD8-XCL1+XCL2+
TMEM173	1.83637e-09	0.374737	0.454	0.264	2.45504e-05	GBM.rec.PBMC	TMEM173	0.19	P12_CD4-CD8-XCL1+XCL2+
ZFP36L1	6.13118e-08	0.373782	0.46	0.284	0.000819677	GBM.rec.PBMC	ZFP36L1	0.176	P12_CD4-CD8-XCL1+XCL2+
2021-09-01	7.79181e-07	0.373233	0.411	0.259	0.0104169	GBM.rec.PBMC	2021-09-01	0.152	P12_CD4-CD8-XCL1+XCL2+
LEF1	6.01611e-07	0.370242	0.295	0.167	0.00804293	GBM.rec.PBMC	LEF1	0.128	P12_CD4-CD8-XCL1+XCL2+
CNBP	2.217e-10	0.368719	0.788	0.61	2.9639e-06	GBM.rec.PBMC	CNBP	0.178	P12_CD4-CD8-XCL1+XCL2+
UBE2J1	1.63807e-10	0.368016	0.318	0.145	2.18994e-06	GBM.rec.PBMC	UBE2J1	0.173	P12_CD4-CD8-XCL1+XCL2+
JAK3	9.4392e-07	0.368009	0.265	0.144	0.0126193	GBM.rec.PBMC	JAK3	0.121	P12_CD4-CD8-XCL1+XCL2+
C7orf50	2.4745e-10	0.360515	0.272	0.116	3.30815e-06	GBM.rec.PBMC	C7orf50	0.156	P12_CD4-CD8-XCL1+XCL2+
NCR1	5.66005e-10	0.359595	0.457	0.259	7.56692e-06	GBM.rec.PBMC	NCR1	0.198	P12_CD4-CD8-XCL1+XCL2+
PPP2R1A	4.63287e-10	0.359383	0.374	0.194	6.19368e-06	GBM.rec.PBMC	PPP2R1A	0.18	P12_CD4-CD8-XCL1+XCL2+
C12orf57	2.40349e-06	0.357925	0.556	0.408	0.0321322	GBM.rec.PBMC	C12orf57	0.148	P12_CD4-CD8-XCL1+XCL2+
ARID5A	2.72462e-07	0.357171	0.358	0.207	0.00364254	GBM.rec.PBMC	ARID5A	0.151	P12_CD4-CD8-XCL1+XCL2+
ITGAM	3.09878e-09	0.354964	0.543	0.356	4.14277e-05	GBM.rec.PBMC	ITGAM	0.187	P12_CD4-CD8-XCL1+XCL2+
TAGAP	4.71624e-07	0.353904	0.338	0.193	0.00630514	GBM.rec.PBMC	TAGAP	0.145	P12_CD4-CD8-XCL1+XCL2+
TRABD	2.1322e-10	0.353083	0.53	0.322	2.85053e-06	GBM.rec.PBMC	TRABD	0.208	P12_CD4-CD8-XCL1+XCL2+
MYH9	5.28903e-06	0.352057	0.51	0.368	0.0707091	GBM.rec.PBMC	MYH9	0.142	P12_CD4-CD8-XCL1+XCL2+
GSTP1	3.45724e-09	0.347213	0.831	0.698	4.62198e-05	GBM.rec.PBMC	GSTP1	0.133	P12_CD4-CD8-XCL1+XCL2+
ZFP36	0.0036485	0.347034	0.599	0.554	1	GBM.rec.PBMC	ZFP36	0.045	P12_CD4-CD8-XCL1+XCL2+
CLSTN3	8.92466e-08	0.346895	0.311	0.168	0.00119314	GBM.rec.PBMC	CLSTN3	0.143	P12_CD4-CD8-XCL1+XCL2+
IFITM2	1.5231e-12	0.346872	0.944	0.972	2.03623e-08	GBM.rec.PBMC	IFITM2	-0.028	P12_CD4-CD8-XCL1+XCL2+
OXA1L	2.96606e-08	0.344702	0.311	0.162	0.000396533	GBM.rec.PBMC	OXA1L	0.149	P12_CD4-CD8-XCL1+XCL2+
REX1BD	1.00309e-06	0.344681	0.5	0.34	0.0134103	GBM.rec.PBMC	REX1BD	0.16	P12_CD4-CD8-XCL1+XCL2+
MGAT1	1.46239e-05	0.34455	0.321	0.197	0.195507	GBM.rec.PBMC	MGAT1	0.124	P12_CD4-CD8-XCL1+XCL2+
[truncated: 4,037 more rows]

## Sheet: ENRICHR
Term	Overlap	P-value	Adjusted P-value	Old P-value	Old Adjusted P-value	Odds Ratio	Combined Score	Genes
G2-M Checkpoint	17/200	7.85779e-11	2.98596e-09	0	0	9.01277	209.699	TOP2A;CUL3;AMD1;ATRX;PRPF4B;HMMR;MKI67;SMC4;CCNA2;CENPE;CCNB2;CENPF;SFPQ;XPO1;UBE2S;CDK1;TMPO
E2F Targets	16/200	7.06579e-10	1.3425e-08	0	0	8.39452	176.877	TOP2A;PRPS1;RRM2;HMMR;MKI67;SMC4;PNN;CENPE;CCNB2;XPO1;UBE2S;CDK1;LUC7L3;DLGAP5;TMPO;SPC25
Mitotic Spindle	14/199	4.33333e-08	5.48888e-07	0	0	7.23386	122.645	TOP2A;ARFGEF1;RALBP1;MYO9B;SMC4;AKAP13;CENPE;CCNB2;PCM1;CENPF;NIN;CDK1;SOS1;DLGAP5
Protein Secretion	5/96	0.00410341	0.0389824	0	0	5.05546	27.7845	ARFGEF1;GOLGA4;RAB14;LAMP2;GNAS
PI3K/AKT/mTOR Signaling	5/105	0.00599126	0.0419321	0	0	4.59836	23.5319	SMAD2;ACTR2;CSNK2B;CDK1;IL2RG
KRAS Signaling Up	7/200	0.00662085	0.0419321	0	0	3.35116	16.8145	ERO1A;NIN;SATB1;TOR1AIP2;IL2RG;ETS1;BIRC3
Apoptosis	6/161	0.00871041	0.0472851	0	0	3.56674	16.9179	TOP2A;CYLD;SATB1;TXNIP;PMAIP1;BIRC3
Interferon Alpha Response	1997-04-01	0.0219843	0.0876445	0	0	3.93858	15.0353	SAMD9;TXNIP;PARP14;GBP2
Interferon Gamma Response	6/200	0.0230643	0.0876445	0	0	2.84405	10.7206	PSMA2;TXNIP;ST3GAL5;PARP14;HLA-DRB1;PTPN2
Myc Targets V1	6/200	0.0230643	0.0876445	0	0	2.84405	10.7206	CCNA2;RSL1D1;SET;XPO1;PSMA2;SRSF7
TNF-alpha Signaling via NF-kB	5/200	0.0693734	0.178311	0	0	2.34675	6.26173	GPR183;FOSB;CCNL1;KLF2;BIRC3
Glycolysis	5/200	0.0693734	0.178311	0	0	2.34675	6.26173	ERO1A;PRPS1;CDK1;HMMR;ARPP19
p53 Pathway	5/200	0.0693734	0.178311	0	0	2.34675	6.26173	TSPYL2;CD81;FBXW7;TXNIP;XPC
Allograft Rejection	5/200	0.0693734	0.178311	0	0	2.34675	6.26173	PTPRC;LTB;IL2RG;GBP2;ETS1
IL-6/JAK/STAT3 Signaling	1987-03-01	0.0703858	0.178311	0	0	3.25678	8.64272	LTB;IL2RG;PTPN2
UV Response Up	4/158	0.0958938	0.227748	0	0	2.37113	5.55914	AMD1;FOSB;RASGRP1;GLS
Unfolded Protein Response	3/113	0.127285	0.28452	0	0	2.48371	5.11974	ERO1A;TSPYL2;TTC37
Estrogen Response Early	4/200	0.176992	0.369079	0	0	1.85904	3.21921	BCL11B;PMAIP1;RASGRP1;MYBL1
Spermatogenesis	3/135	0.184539	0.369079	0	0	2.06745	3.49376	TLE4;CCNB2;CDK1
UV Response Dn	3/144	0.209653	0.398341	0	0	1.93459	3.02242	PHF3;ATRX;SYNE1
DNA Repair	3/150	0.226796	0.410393	0	0	1.85506	2.75237	TAF10;POLR1D;XPC
IL-2/STAT5 Signaling	3/199	0.372151	0.540854	0	0	1.38783	1.3718	CD81;CD48;LTB
Apical Junction	3/200	0.375123	0.540854	0	0	1.38071	1.35379	ITGB1;PTPRC;ARHGEF6
mTORC1 Signaling	3/200	0.375123	0.540854	0	0	1.38071	1.35379	ERO1A;ACTR2;RRM2
Inflammatory Response	3/200	0.375123	0.540854	0	0	1.38071	1.35379	GPR183;CD48;RASGRP1
heme Metabolism	3/200	0.375123	0.540854	0	0	1.38071	1.35379	RNF19A;LAMP2;TNRC6B
Apical Surface	1944-01-01	0.384291	0.540854	0	0	2.10561	2.01371	IL2RG
Hypoxia	2/200	0.646049	0.786193	0	0	0.911558	0.398242	ERO1A;ETS1
Complement	2/200	0.646049	0.786193	0	0	0.911558	0.398242	LAMP2;RASGRP1
Xenobiotic Metabolism	2/200	0.646049	0.786193	0	0	0.911558	0.398242	PTGDS;ARPP19
Oxidative Phosphorylation	2/200	0.646049	0.786193	0	0	0.911558	0.398242	NDUFB8;NDUFC2
Androgen Response	1/100	0.668387	0.786193	0	0	0.911964	0.36742	SLC38A2
Pperoxisome	1/104	0.682746	0.786193	0	0	0.876369	0.334451	TOP2A
Coagulation	1/138	0.782311	0.874347	0	0	0.657738	0.161477	LAMP2
Adipogenesis	1/200	0.890645	0.890645	0	0	0.451385	0.0522747	G3BP2
Estrogen Response Late	1/200	0.890645	0.890645	0	0	0.451385	0.0522747	TOP2A
Myogenesis	1/200	0.890645	0.890645	0	0	0.451385	0.0522747	ITGB1
Epithelial Mesenchymal Transition	1/200	0.890645	0.890645	0	0	0.451385	0.0522747	ITGB1
