# Supplementary material for: Neoadjuvant PD-1 blockade induces T cell and cDC1 activation but fails to overcome the immunosuppressive tumor associated macrophages in recurrent glioblastoma
Source: Research Square preprint supplement (doi:10.21203/rs.3.rs-793187/v1), 2021-08-13
Supplement: Supplementary file 5 [file SuppTable5-TRUST4-TCR.xlsx]

## Sheet: TIL
clono2	cellNum	ClonoFreq	ID	condition	celltype
CASTPQGLNQPQHF	17	0.00118699	LB4102T	GBM.rec	L+M-3,L+M-1,L1-GZMK.CD8A.T,L+M-2,Dying
CASSFLTTDTQYF	8	0.000558581	LB4102T	GBM.rec	L1-GZMK.CD8A.T,L2-IL7R-CD69-CD40L.T,L+M-1,L4-Treg
CASSLYKLAGENEQFF	7	0.000488759	LB4102T	GBM.rec	L1-GZMK.CD8A.T,L+M-2,Dying
CATSRDRVQGAINTIYF	7	0.000488759	LB4102T	GBM.rec	L1-GZMK.CD8A.T,L2-IL7R-CD69-CD40L.T,L4-Treg,L+M-2,L+M-1
CASSPRGWVGNSPLHF	5	0.000349113	LB4101T	GBM.rec	L+M-1,L6-Proliferating
CAVGEGNTEAFF	5	0.000349113	LB4102T	GBM.rec	L+M-2,L+M-3,L1-GZMK.CD8A.T,L2-IL7R-CD69-CD40L.T,L+M-1
CASSEALGQVEEQYF	4	0.000279291	LB4102T	GBM.rec	L+M-1,L1-GZMK.CD8A.T,L+M-2
CASSEYSFSYNEQFF	4	0.000279291	LB4102T	GBM.rec	L+M-2,L6-Proliferating,L+M-1
CASSKTSGRAGEQFF	4	0.000279291	LB4102T	GBM.rec	L6-Proliferating,L1-GZMK.CD8A.T,L+M-1
CASSPGLAGIELFF	4	0.000279291	LB4102T	GBM.rec	L1-GZMK.CD8A.T,L2-IL7R-CD69-CD40L.T,L6-Proliferating,L+M-2
CASSPLGGITRWEQYF	4	0.000279291	LB4102T	GBM.rec	L1-GZMK.CD8A.T
CSAPRGTGPPGELFF	4	0.000279291	LB4102T	GBM.rec	L+M-1,L1-GZMK.CD8A.T
CSVETLQGSSYEQYF	4	0.000279291	LB4102T	GBM.rec	L5-Tc/NK,L+M-1,L+M-3,L1-GZMK.CD8A.T
CASSYNYNEQFF	3	0.000209468	LB4059T	GBM.rec	L1-GZMK.CD8A.T,L+M-2,L+M-3
CASSETDTQYF	3	0.000209468	LB4101T	GBM.rec	L+M-1
CASSLDGQGDNEQFF	3	0.000209468	LB4102T	GBM.rec	L+M-2,L1-GZMK.CD8A.T
CASSLGPSGSGYEQFF	3	0.000209468	LB4102T	GBM.rec	L1-GZMK.CD8A.T,L7-pDC-Bcells
CASSLQGQNDEQYF	3	0.000209468	LB4102T	GBM.rec	Dying,L2-IL7R-CD69-CD40L.T
CASSPLSRTGSDYGYTF	3	0.000209468	LB4102T	GBM.rec	L1-GZMK.CD8A.T,L+M-2
CATSRDRLAGSNHEQFF	3	0.000209468	LB4102T	GBM.rec	L4-Treg,L1-GZMK.CD8A.T,L+M-2
CSARDLEGRNTGELFF	3	0.000209468	LB4102T	GBM.rec	L6-Proliferating,L+M-3,L1-GZMK.CD8A.T
CASSDPGLAGGNEQFF	3	0.000209468	LB4177T	GBM.rec	L+M-1,L2-IL7R-CD69-CD40L.T,L6-Proliferating
CASSDGTGTGNEQFF	2	0.000139645	LB4101T	GBM.rec	L6-Proliferating,L+M-3
CASSLAIGQGHQETQYF	2	0.000139645	LB4101T	GBM.rec	L+M-1,L6-Proliferating
CASSSPLQGVGSPLHF	2	0.000139645	LB4101T	GBM.rec	L+M-1
CASSSTPTGVLPSF	2	0.000139645	LB4101T	GBM.rec	L1-GZMK.CD8A.T
CASSVGQYEQYF	2	0.000139645	LB4101T	GBM.rec	L+M-1,L3-IL7R-TOX-TCF7.T
CSASGTSGTYEQYF	2	0.000139645	LB4101T	GBM.rec	L+M-1,L1-GZMK.CD8A.T
CACGTRVDEQYF	2	0.000139645	LB4102T	GBM.rec	L+M-1
CASGTGLAGNEQFF	2	0.000139645	LB4102T	GBM.rec	L1-GZMK.CD8A.T,L+M-2
CASSEFMPPYEQYF	2	0.000139645	LB4102T	GBM.rec	L+M-1,L2-IL7R-CD69-CD40L.T
CASSGPLGTEAFF	2	0.000139645	LB4102T	GBM.rec	L+M-1
CASSIHSNQPQHF	2	0.000139645	LB4102T	GBM.rec	L1-GZMK.CD8A.T,L7-pDC-Bcells
CASSLEFSAPSSYNEQFF	2	0.000139645	LB4102T	GBM.rec	L1-GZMK.CD8A.T,L+M-1
CASSLGDRVTGELFF	2	0.000139645	LB4102T	GBM.rec	Dying,L2-IL7R-CD69-CD40L.T
CASSLGQLSYNEQFF	2	0.000139645	LB4102T	GBM.rec	L1-GZMK.CD8A.T,L+M-1
CASSLPGGTAYNEQFF	2	0.000139645	LB4102T	GBM.rec	L1-GZMK.CD8A.T,L+M-1
CASSLYLKQTHEQYF	2	0.000139645	LB4102T	GBM.rec	L+M-1
CASSPNSGANTGELFF	2	0.000139645	LB4102T	GBM.rec	L1-GZMK.CD8A.T,L6-Proliferating
CASSQLIGRPYEQYF	2	0.000139645	LB4102T	GBM.rec	L2-IL7R-CD69-CD40L.T,L+M-2
CASSYSPSHNTEAFF	2	0.000139645	LB4102T	GBM.rec	L+M-1,L1-GZMK.CD8A.T
CAWSLAVETQYF	2	0.000139645	LB4102T	GBM.rec	L+M-2,Dying
CSASWTGGLQTQYF	2	0.000139645	LB4102T	GBM.rec	L+M-2,L+M-1
CASSLAGAPSTDTQYF	2	0.000139645	LB4143T	GBM.rec	Dying,L5-Tc/NK
CASTPRLAGVGDTQYF	2	0.000139645	LB4143T	GBM.rec	L6-Proliferating,L1-GZMK.CD8A.T
CASSPRDRAGQETQYF	2	0.000139645	LB4177T	GBM.rec	L+M-1,L1-GZMK.CD8A.T
CACSKTFGRAGEQFL	1	6.98227e-05	LB4102T	GBM.rec	L6-Proliferating
CAGQGSAGANVLTF	1	6.98227e-05	LB4102T	GBM.rec	Dying
CAGRQGSTGNTIYF	1	6.98227e-05	LB4102T	GBM.rec	L1-GZMK.CD8A.T
CAILGQSTYEQYF	1	6.98227e-05	LB3579T	GBM.rec	L5-Tc/NK
CAILVPGQGTTSYEQYF	1	6.98227e-05	LB4101T	GBM.rec	L1-GZMK.CD8A.T
CAINPRGVETDTQYF	1	6.98227e-05	LB4101T	GBM.rec	L+M-3
CAIRDSRTDTQYF	1	6.98227e-05	LB4177T	GBM.rec	L2-IL7R-CD69-CD40L.T
CAIRPGTDNSPLHF	1	6.98227e-05	LB4101T	GBM.rec	L+M-3
CAISAPDTTYEQYF	1	6.98227e-05	LB4102T	GBM.rec	L3-IL7R-TOX-TCF7.T
CAISDTGAPGIGYTF	1	6.98227e-05	LB4101T	GBM.rec	L+M-1
CAISELDRKSSYEQYF	1	6.98227e-05	LB4102T	GBM.rec	L6-Proliferating
CAISESIGTSGSGNEQYF	1	6.98227e-05	LB4177T	GBM.rec	L6-Proliferating
CAISESLNEQFF	1	6.98227e-05	LB4102T	GBM.rec	L1-GZMK.CD8A.T
CAISESRGGVETQYF	1	6.98227e-05	LB4102T	GBM.rec	L1-GZMK.CD8A.T
CAISESSGRVNYNEQFF	1	6.98227e-05	LB4102T	GBM.rec	L+M-1
CAISEVISTGSRTDTQYF	1	6.98227e-05	LB4102T	GBM.rec	L+M-2
CAISGLYPAQEQGFYNEQFF	1	6.98227e-05	LB4102T	GBM.rec	L4-Treg
CAISPDRGVGNTIYF	1	6.98227e-05	LB4102T	GBM.rec	L2-IL7R-CD69-CD40L.T
CAISVAEASDEQFF	1	6.98227e-05	LB4102T	GBM.rec	L+M-1
CAISVGQGAMSYTF	1	6.98227e-05	LB4102T	GBM.rec	L1-GZMK.CD8A.T
CARSIHSNQPQHF	1	6.98227e-05	LB4102T	GBM.rec	L5-Tc/NK
CASAPWGEETQYF	1	6.98227e-05	LB4102T	GBM.rec	L+M-1
CASFHNTDTQYF	1	6.98227e-05	LB4101T	GBM.rec	L2-IL7R-CD69-CD40L.T
CASGGPYNEQFF	1	6.98227e-05	LB4102T	GBM.rec	L5-Tc/NK
CASGGTSSTDTQYF	1	6.98227e-05	LB4143T	GBM.rec	L4-Treg
CASGSGTENTGELIF	1	6.98227e-05	LB4102T	GBM.rec	L2-IL7R-CD69-CD40L.T
CASHPGQGISEQYF	1	6.98227e-05	LB4102T	GBM.rec	L1-GZMK.CD8A.T
CASIRSSGGAAGELFF	1	6.98227e-05	LB4177T	GBM.rec	L2-IL7R-CD69-CD40L.T
CASKGLARSRERDGYTF	1	6.98227e-05	LB4101T	GBM.rec	L1-GZMK.CD8A.T
CASKRLGGETQYF	1	6.98227e-05	LB4102T	GBM.rec	L+M-1
CASMNSQETQYF	1	6.98227e-05	LB4177T	GBM.rec	L+M-1
CASNGAGGAYGYTF	1	6.98227e-05	LB4102T	GBM.rec	L1-GZMK.CD8A.T
CASNLVGSTDTQYF	1	6.98227e-05	LB4102T	GBM.rec	L+M-1
CASNTDGSPTNTGELFF	1	6.98227e-05	LB4102T	GBM.rec	L+M-1
CASNVAGGNTGELFF	1	6.98227e-05	LB4102T	GBM.rec	L1-GZMK.CD8A.T
CASPTGAGVNYNEQFF	1	6.98227e-05	LB4102T	GBM.rec	L1-GZMK.CD8A.T
CASQGPGQGVREVWGETQYF	1	6.98227e-05	LB4102T	GBM.rec	L5-Tc/NK
CASRASGVLLAGSNEQFF	1	6.98227e-05	LB4101T	GBM.rec	L2-IL7R-CD69-CD40L.T
CASRDEPGGSTEAFF	1	6.98227e-05	LB4143T	GBM.rec	L1-GZMK.CD8A.T
CASRGLAAYEQYF	1	6.98227e-05	LB4102T	GBM.rec	L+M-1
CASRGTGGGTEAFF	1	6.98227e-05	LB4177T	GBM.rec	L6-Proliferating
CASRGVTSPDTQYF	1	6.98227e-05	LB4102T	GBM.rec	L2-IL7R-CD69-CD40L.T
CASRHEQFF	1	6.98227e-05	LB4177T	GBM.rec	L1-GZMK.CD8A.T
CASRIMGLAGAKRHEQFF	1	6.98227e-05	LB4102T	GBM.rec	L+M-2
CASRIPGLATYEQYF	1	6.98227e-05	LB4102T	GBM.rec	L4-Treg
CASRITANTEAFF	1	6.98227e-05	LB4102T	GBM.rec	L+M-1
CASRLLAWDSRSYEQYF	1	6.98227e-05	LB4177T	GBM.rec	L4-Treg
CASRNLSPGGPGYTF	1	6.98227e-05	LB4102T	GBM.rec	L+M-1
CASRPDRRDLSYEQYF	1	6.98227e-05	LB4102T	GBM.rec	L2-IL7R-CD69-CD40L.T
CASRPPDQGSNQPQHF	1	6.98227e-05	LB4102T	GBM.rec	L+M-1
CASRPRGIGTKNNQYF	1	6.98227e-05	LB4059T	GBM.rec	L4-Treg
CASRPYMENTGELFF	1	6.98227e-05	LB4177T	GBM.rec	L+M-1
CASRQPSGSSTDTQYF	1	6.98227e-05	LB4102T	GBM.rec	L2-IL7R-CD69-CD40L.T
CASRQRGRARNEQFF	1	6.98227e-05	LB4102T	GBM.rec	L+M-2
CASRRRSLAYEQYF	1	6.98227e-05	LB4101T	GBM.rec	L+M-2
CASRRTSGAPNTGELFF	1	6.98227e-05	LB4130T	GBM.rec	L4-Treg
CASRTGGYGYTF	1	6.98227e-05	LB4177T	GBM.rec	L6-Proliferating
CASSAETDRGRDEQFF	1	6.98227e-05	LB4102T	GBM.rec	L1-GZMK.CD8A.T
CASSAGPGYEQYF	1	6.98227e-05	LB4177T	GBM.rec	L+M-1
CASSAGQGNSPLHF	1	6.98227e-05	LB4102T	GBM.rec	L3-IL7R-TOX-TCF7.T
CASSAGTATSKAFF	1	6.98227e-05	LB4102T	GBM.rec	L2-IL7R-CD69-CD40L.T
CASSAHGTDYYEQYF	1	6.98227e-05	LB4102T	GBM.rec	L+M-1
CASSALMSSGYSYEQYF	1	6.98227e-05	LB4102T	GBM.rec	L7-pDC-Bcells
CASSAPAGGAYEQYF	1	6.98227e-05	LB3958T	GBM.rec	L2-IL7R-CD69-CD40L.T
CASSARGVGYEQYF	1	6.98227e-05	LB4102T	GBM.rec	L2-IL7R-CD69-CD40L.T
CASSCQGEPYQETQYF	1	6.98227e-05	LB4101T	GBM.rec	L+M-3
CASSDIAGGPSEQYF	1	6.98227e-05	LB4102T	GBM.rec	L6-Proliferating
CASSDIGGNQPQHF	1	6.98227e-05	LB4102T	GBM.rec	L+M-1
CASSDPHGQGQETQYF	1	6.98227e-05	LB4102T	GBM.rec	L1-GZMK.CD8A.T
CASSDPLVVSAYNEQFF	1	6.98227e-05	LB4102T	GBM.rec	L2-IL7R-CD69-CD40L.T
CASSDSVAGGMDTQYF	1	6.98227e-05	LB4102T	GBM.rec	L2-IL7R-CD69-CD40L.T
CASSEEGWTAYEQYF	1	6.98227e-05	LB4102T	GBM.rec	L4-Treg
CASSEGFEAFF	1	6.98227e-05	LB4101T	GBM.rec	L2-IL7R-CD69-CD40L.T
CASSEGGGSALAAQFF	1	6.98227e-05	LB4102T	GBM.rec	L+M-1
CASSEGGGSQPQHF	1	6.98227e-05	LB4102T	GBM.rec	L+M-1
CASSEGPPHTEAFF	1	6.98227e-05	LB4102T	GBM.rec	L4-Treg
CASSEGSGTGGNTQYF	1	6.98227e-05	LB4102T	GBM.rec	L1-GZMK.CD8A.T
CASSELGETQYF	1	6.98227e-05	LB4177T	GBM.rec	L2-IL7R-CD69-CD40L.T
CASSEPLGTGINYGYTF	1	6.98227e-05	LB3958T	GBM.rec	L3-IL7R-TOX-TCF7.T
CASSERQGAWNEQFF	1	6.98227e-05	LB4177T	GBM.rec	L2-IL7R-CD69-CD40L.T
CASSEYDRGLGQMGEQYF	1	6.98227e-05	LB4102T	GBM.rec	L+M-1
CASSFASGGKETQYF	1	6.98227e-05	LB4102T	GBM.rec	L6-Proliferating
CASSFDGGPDTQYF	1	6.98227e-05	LB4143T	GBM.rec	L4-Treg
CASSFDTEAFF	1	6.98227e-05	LB4102T	GBM.rec	L2-IL7R-CD69-CD40L.T
CASSFEVRNTGELFF	1	6.98227e-05	LB4102T	GBM.rec	L6-Proliferating
CASSFFGRPYNEQFF	1	6.98227e-05	LB4102T	GBM.rec	L5-Tc/NK
CASSFFGSSFQETQYF	1	6.98227e-05	LB4102T	GBM.rec	Dying
CASSFFSSSEQFF	1	6.98227e-05	LB4102T	GBM.rec	L1-GZMK.CD8A.T
CASSFLAGAAGELFF	1	6.98227e-05	LB4101T	GBM.rec	L1-GZMK.CD8A.T
CASSFPGTQETQYF	1	6.98227e-05	LB4102T	GBM.rec	L1-GZMK.CD8A.T
CASSFRAGSGELFF	1	6.98227e-05	LB4102T	GBM.rec	L+M-1
CASSFRDPHGYSNYGYTF	1	6.98227e-05	LB4102T	GBM.rec	L4-Treg
CASSFRLAYGHEQFF	1	6.98227e-05	LB4102T	GBM.rec	L1-GZMK.CD8A.T
CASSFRLVGRTYEQYF	1	6.98227e-05	LB4102T	GBM.rec	L1-GZMK.CD8A.T
CASSFRPHEQFF	1	6.98227e-05	LB4102T	GBM.rec	L+M-1
CASSFSDPETQYF	1	6.98227e-05	LB4177T	GBM.rec	Dying
CASSFSGGGLAEAFF	1	6.98227e-05	LB4102T	GBM.rec	L+M-1
CASSFSPGQALSYGYTF	1	6.98227e-05	LB4177T	GBM.rec	L2-IL7R-CD69-CD40L.T
CASSFSSGPLGYEQYF	1	6.98227e-05	LB4102T	GBM.rec	L+M-2
CASSFSSGTAYEQYF	1	6.98227e-05	LB4102T	GBM.rec	L6-Proliferating
CASSFTPTGMYYGYTF	1	6.98227e-05	LB4102T	GBM.rec	L+M-3
CASSFYLAGSTDTQYF	1	6.98227e-05	LB4143T	GBM.rec	L5-Tc/NK
CASSGDRGRQSGYTF	1	6.98227e-05	LB4177T	GBM.rec	L+M-2
CASSGGAPGLAGANTQYF	1	6.98227e-05	LB4101T	GBM.rec	L+M-1
CASSGGDYPLDQETQYF	1	6.98227e-05	LB4143T	GBM.rec	L1-GZMK.CD8A.T
CASSGGQGARGSYEQYF	1	6.98227e-05	LB4102T	GBM.rec	L2-IL7R-CD69-CD40L.T
CASSGGTGKGYEQYF	1	6.98227e-05	LB4177T	GBM.rec	L3-IL7R-TOX-TCF7.T
CASSGMTGPAETQYF	1	6.98227e-05	LB4102T	GBM.rec	L2-IL7R-CD69-CD40L.T
CASSGRDFTGADSPLHF	1	6.98227e-05	LB4101T	GBM.rec	L1-GZMK.CD8A.T
CASSGVGEQYF	1	6.98227e-05	LB4102T	GBM.rec	L5-Tc/NK
CASSGVSYNEQFF	1	6.98227e-05	LB4177T	GBM.rec	L2-IL7R-CD69-CD40L.T
CASSGYGPVAGNTIYF	1	6.98227e-05	LB4101T	GBM.rec	L+M-1
CASSHPVTGGGDEQFF	1	6.98227e-05	LB4102T	GBM.rec	L4-Treg
CASSHRQYQAKNIQYF	1	6.98227e-05	LB4102T	GBM.rec	L+M-1
CASSIDVAGGGTNEQFF	1	6.98227e-05	LB4101T	GBM.rec	L2-IL7R-CD69-CD40L.T
CASSILETSGIYNEQFF	1	6.98227e-05	LB4102T	GBM.rec	L4-Treg
CASSIRLSSSYEQDF	1	6.98227e-05	LB4101T	GBM.rec	L1-GZMK.CD8A.T
CASSITGTGGEQYF	1	6.98227e-05	LB4102T	GBM.rec	L1-GZMK.CD8A.T
CASSITTGGPYNEQFF	1	6.98227e-05	LB4102T	GBM.rec	L+M-1
CASSIYPTDTQYF	1	6.98227e-05	LB4102T	GBM.rec	L+M-1
CASSKGQLSYNEQFF	1	6.98227e-05	LB4102T	GBM.rec	L6-Proliferating
CASSLAALAGLYNEQFF	1	6.98227e-05	LB4177T	GBM.rec	L4-Treg
CASSLAASGGGEQFF	1	6.98227e-05	LB4102T	GBM.rec	L+M-3
CASSLAASGSSYIQYF	1	6.98227e-05	LB4102T	GBM.rec	L+M-1
CASSLAFITSGGERYEQYF	1	6.98227e-05	LB4143T	GBM.rec	L2-IL7R-CD69-CD40L.T
CASSLAGPAQGGYTF	1	6.98227e-05	LB4101T	GBM.rec	L+M-1
CASSLAGQLYYGYTF	1	6.98227e-05	LB4101T	GBM.rec	L1-GZMK.CD8A.T
CASSLAGRDTEAFF	1	6.98227e-05	LB4102T	GBM.rec	L+M-1
CASSLAGRLPLNEQFF	1	6.98227e-05	LB4015T	GBM.rec	L6-Proliferating
CASSLAGTSSGPSEQYF	1	6.98227e-05	LB4102T	GBM.rec	L+M-2
CASSLALAGKNEQFF	1	6.98227e-05	LB4102T	GBM.rec	L4-Treg
CASSLAQGGATQYF	1	6.98227e-05	LB4177T	GBM.rec	L6-Proliferating
CASSLAQGGQETQYF	1	6.98227e-05	LB4102T	GBM.rec	L2-IL7R-CD69-CD40L.T
CASSLAWGQNEAFF	1	6.98227e-05	LB4102T	GBM.rec	L5-Tc/NK
CASSLDLPGQTPYEQYF	1	6.98227e-05	LB4177T	GBM.rec	L3-IL7R-TOX-TCF7.T
CASSLDPGTAAYEQYF	1	6.98227e-05	LB4102T	GBM.rec	L1-GZMK.CD8A.T
CASSLDQGGSGSYNEQFF	1	6.98227e-05	LB4102T	GBM.rec	L1-GZMK.CD8A.T
CASSLDSYYGYTF	1	6.98227e-05	LB4102T	GBM.rec	L2-IL7R-CD69-CD40L.T
CASSLEGCLNTEAFF	1	6.98227e-05	LB4102T	GBM.rec	L+M-1
CASSLEGGSYTGELFF	1	6.98227e-05	LB4102T	GBM.rec	L1-GZMK.CD8A.T
CASSLEGPEAFF	1	6.98227e-05	LB4101T	GBM.rec	L2-IL7R-CD69-CD40L.T
CASSLEGRSSGTYNEQFF	1	6.98227e-05	LB4102T	GBM.rec	L+M-1
CASSLENRGIKTEAFF	1	6.98227e-05	LB4102T	GBM.rec	L2-IL7R-CD69-CD40L.T
CASSLEVTEAFF	1	6.98227e-05	LB4102T	GBM.rec	L2-IL7R-CD69-CD40L.T
CASSLEWVPQETQYF	1	6.98227e-05	LB4102T	GBM.rec	L1-GZMK.CD8A.T
CASSLFLAGTGGQGLPYEQYF	1	6.98227e-05	LB4101T	GBM.rec	Dying
CASSLFSVDIRGPTDTQYF	1	6.98227e-05	LB4177T	GBM.rec	L+M-2
CASSLGAAEGYTF	1	6.98227e-05	LB4101T	GBM.rec	Dying
CASSLGAAQANEKLFF	1	6.98227e-05	LB4101T	GBM.rec	L2-IL7R-CD69-CD40L.T
CASSLGAGWGYTF	1	6.98227e-05	LB4102T	GBM.rec	Dying
CASSLGDRGIQETQYF	1	6.98227e-05	LB4102T	GBM.rec	L2-IL7R-CD69-CD40L.T
CASSLGGPEWAEAFF	1	6.98227e-05	LB4102T	GBM.rec	L5-Tc/NK
CASSLGGYSTDTQYF	1	6.98227e-05	LB4143T	GBM.rec	L1-GZMK.CD8A.T
CASSLGLVPDTQYF	1	6.98227e-05	LB4059T	GBM.rec	L+M-2
CASSLGQAYEQYF	1	6.98227e-05	LB4101T	GBM.rec	L1-GZMK.CD8A.T
CASSLGQSYEQYF	1	6.98227e-05	LB4102T	GBM.rec	L2-IL7R-CD69-CD40L.T
CASSLGQTAEQYF	1	6.98227e-05	LB4101T	GBM.rec	L+M-1
CASSLGQVYEQYF	1	6.98227e-05	LB4101T	GBM.rec	L+M-3
CASSLGTAKETQYF	1	6.98227e-05	LB4101T	GBM.rec	L2-IL7R-CD69-CD40L.T
CASSLGTGSGSNQPQHF	1	6.98227e-05	LB4177T	GBM.rec	L+M-1
CASSLGTKNIQYF	1	6.98227e-05	LB4177T	GBM.rec	L+M-1
CASSLGVQGPTDTQYF	1	6.98227e-05	LB4101T	GBM.rec	L+M-1
CASSLGYMDVDNEQFF	1	6.98227e-05	LB4177T	GBM.rec	L3-IL7R-TOX-TCF7.T
CASSLGYNTEAFF	1	6.98227e-05	LB4101T	GBM.rec	L1-GZMK.CD8A.T
CASSLLGSYGYTF	1	6.98227e-05	LB4102T	GBM.rec	L1-GZMK.CD8A.T
CASSLLGVIVPQHF	1	6.98227e-05	LB4102T	GBM.rec	Dying
CASSLLHTGGEQYF	1	6.98227e-05	LB4177T	GBM.rec	L4-Treg
CASSLLRGRSYNEQFF	1	6.98227e-05	LB4102T	GBM.rec	Dying
CASSLLRTGGNTEAFF	1	6.98227e-05	LB4102T	GBM.rec	L+M-2
CASSLLSGAGQYF	1	6.98227e-05	LB4102T	GBM.rec	L4-Treg
CASSLNPVGYSYNEQFF	1	6.98227e-05	LB3579T	GBM.rec	L5-Tc/NK
CASSLRASGTEAFF	1	6.98227e-05	LB3958T	GBM.rec	L3-IL7R-TOX-TCF7.T
CASSLRSVADSNQPQHF	1	6.98227e-05	LB4101T	GBM.rec	L2-IL7R-CD69-CD40L.T
CASSLRTSGAYNEQFF	1	6.98227e-05	LB4102T	GBM.rec	L+M-1
CASSLSANEQFF	1	6.98227e-05	LB4102T	GBM.rec	L+M-1
CASSLSGGQGSWETQYF	1	6.98227e-05	LB4102T	GBM.rec	L2-IL7R-CD69-CD40L.T
CASSLSGTQYF	1	6.98227e-05	LB4101T	GBM.rec	L6-Proliferating
CASSLSRPDTQYF	1	6.98227e-05	LB4102T	GBM.rec	L1-GZMK.CD8A.T
CASSLSYREQYF	1	6.98227e-05	LB4102T	GBM.rec	L5-Tc/NK
CASSLTEFSEAFF	1	6.98227e-05	LB4177T	GBM.rec	Dying
CASSLTGGYEQYF	1	6.98227e-05	LB4102T	GBM.rec	L2-IL7R-CD69-CD40L.T
CASSLTGVLSGNTIYF	1	6.98227e-05	LB4101T	GBM.rec	L+M-1
CASSLTHDSYEQYF	1	6.98227e-05	LB4102T	GBM.rec	L2-IL7R-CD69-CD40L.T
CASSLTLITRPMQYF	1	6.98227e-05	LB4102T	GBM.rec	L6-Proliferating
CASSLTSLGSKAFF	1	6.98227e-05	LB4102T	GBM.rec	L5-Tc/NK
CASSLVEGNEKLFF	1	6.98227e-05	LB4102T	GBM.rec	L1-GZMK.CD8A.T
CASSLVESTANEQYF	1	6.98227e-05	LB4102T	GBM.rec	L2-IL7R-CD69-CD40L.T
CASSLVQGQNNEQFF	1	6.98227e-05	LB4177T	GBM.rec	L+M-1
CASSLVSPLYEQYF	1	6.98227e-05	LB4059T	GBM.rec	L+M-2
CASSLVTDGNEQFF	1	6.98227e-05	LB4102T	GBM.rec	L1-GZMK.CD8A.T
CASSLVTTGIYEQYF	1	6.98227e-05	LB4102T	GBM.rec	L1-GZMK.CD8A.T
CASSLWAPNGYTF	1	6.98227e-05	LB4102T	GBM.rec	L1-GZMK.CD8A.T
CASSLWGTEAFF	1	6.98227e-05	LB4101T	GBM.rec	L+M-2
CASSLWLADEQYF	1	6.98227e-05	LB4102T	GBM.rec	L+M-1
CASSLWTGDGYNEQFF	1	6.98227e-05	LB4102T	GBM.rec	L+M-1
CASSLYILAGVRSYEQYF	1	6.98227e-05	LB4102T	GBM.rec	L2-IL7R-CD69-CD40L.T
CASSLYLSYEQYF	1	6.98227e-05	LB3579T	GBM.rec	L3-IL7R-TOX-TCF7.T
CASSMDKGPREPQHF	1	6.98227e-05	LB3964T	GBM.rec	L2-IL7R-CD69-CD40L.T
CASSPAGSGRGYTF	1	6.98227e-05	LB4102T	GBM.rec	L3-IL7R-TOX-TCF7.T
CASSPASAADTQYF	1	6.98227e-05	LB4102T	GBM.rec	L+M-1
CASSPDRGVTYEQYF	1	6.98227e-05	LB4177T	GBM.rec	L3-IL7R-TOX-TCF7.T
CASSPEGQGGSYNEQFF	1	6.98227e-05	LB4177T	GBM.rec	L+M-1
CASSPGGIYSSYEQYF	1	6.98227e-05	LB4101T	GBM.rec	L6-Proliferating
CASSPGGYEQYF	1	6.98227e-05	LB4102T	GBM.rec	L1-GZMK.CD8A.T
CASSPGGYSTDTQYF	1	6.98227e-05	LB4143T	GBM.rec	L+M-3
CASSPGLAGVQQFF	1	6.98227e-05	LB4102T	GBM.rec	Dying
CASSPGLLETQYF	1	6.98227e-05	LB4102T	GBM.rec	L2-IL7R-CD69-CD40L.T
CASSPGQFGTYGYTF	1	6.98227e-05	LB4102T	GBM.rec	L2-IL7R-CD69-CD40L.T
CASSPHGQGHNEQFF	1	6.98227e-05	LB4102T	GBM.rec	L+M-2
CASSPIGAGSGTGEQYF	1	6.98227e-05	LB4177T	GBM.rec	L2-IL7R-CD69-CD40L.T
CASSPMATRDTDTQYF	1	6.98227e-05	LB4015T	GBM.rec	L3-IL7R-TOX-TCF7.T
CASSPMTVDTEAFF	1	6.98227e-05	LB4102T	GBM.rec	L4-Treg
CASSPNQGSDQPQHF	1	6.98227e-05	LB4102T	GBM.rec	L+M-1
CASSPNRDLLYF	1	6.98227e-05	LB4102T	GBM.rec	L2-IL7R-CD69-CD40L.T
CASSPNSGDTQYF	1	6.98227e-05	LB4102T	GBM.rec	L+M-2
CASSPPGEKTQYF	1	6.98227e-05	LB4101T	GBM.rec	L+M-2
CASSPPPDYDGGYSGELFF	1	6.98227e-05	LB4101T	GBM.rec	Dying
CASSPPRVGAEAFF	1	6.98227e-05	LB4177T	GBM.rec	Dying
CASSPPTGPYEQYF	1	6.98227e-05	LB4102T	GBM.rec	L4-Treg
CASSPQDLAGFYNEQFF	1	6.98227e-05	LB4101T	GBM.rec	Dying
CASSPRAGAHNEQFF	1	6.98227e-05	LB4177T	GBM.rec	L1-GZMK.CD8A.T
CASSPRALATNEKLFF	1	6.98227e-05	LB4102T	GBM.rec	L+M-1
CASSPRGGASYNEQFF	1	6.98227e-05	LB4101T	GBM.rec	L+M-1
CASSPRGGVTYNEQFF	1	6.98227e-05	LB4101T	GBM.rec	Dying
CASSPRQGDNSPLHF	1	6.98227e-05	LB4102T	GBM.rec	L+M-1
CASSPRTGLTITDTQYF	1	6.98227e-05	LB4102T	GBM.rec	L2-IL7R-CD69-CD40L.T
CASSPSGTWITGELFF	1	6.98227e-05	LB4102T	GBM.rec	L6-Proliferating
CASSPTGGTGELFF	1	6.98227e-05	LB4102T	GBM.rec	L+M-3
CASSPTNRGGYNQPQHF	1	6.98227e-05	LB4102T	GBM.rec	L+M-1
CASSPTRGYNEQFF	1	6.98227e-05	LB4177T	GBM.rec	L+M-1
CASSPTVDPNYGYTF	1	6.98227e-05	LB4102T	GBM.rec	L4-Treg
CASSPTWSAYGADTQYF	1	6.98227e-05	LB4177T	GBM.rec	L1-GZMK.CD8A.T
CASSPVFPGSYEQYF	1	6.98227e-05	LB4102T	GBM.rec	L1-GZMK.CD8A.T
CASSQALGDTQYF	1	6.98227e-05	LB4102T	GBM.rec	L2-IL7R-CD69-CD40L.T
CASSQASGPDTQYF	1	6.98227e-05	LB4102T	GBM.rec	L6-Proliferating
CASSQDGAGVGNTIYF	1	6.98227e-05	LB4102T	GBM.rec	L6-Proliferating
CASSQDLAGEKETQYF	1	6.98227e-05	LB4177T	GBM.rec	L2-IL7R-CD69-CD40L.T
CASSQDLQGPYSYNEQFF	1	6.98227e-05	LB3579T	GBM.rec	L5-Tc/NK
CASSQDPGPRNTIYF	1	6.98227e-05	LB4102T	GBM.rec	L2-IL7R-CD69-CD40L.T
CASSQDQGFGNQPQHF	1	6.98227e-05	LB4102T	GBM.rec	L+M-1
CASSQDSSGTYNEQFF	1	6.98227e-05	LB4102T	GBM.rec	L2-IL7R-CD69-CD40L.T
CASSQEGDRQNTEAFF	1	6.98227e-05	LB4143T	GBM.rec	L6-Proliferating
CASSQEGQLNTEAFF	1	6.98227e-05	LB4102T	GBM.rec	L4-Treg
CASSQEGTGVPGELFF	1	6.98227e-05	LB4177T	GBM.rec	L+M-2
CASSQEMQAGAFF	1	6.98227e-05	LB4177T	GBM.rec	L+M-2
CASSQEPGGVPYEQYF	1	6.98227e-05	LB4101T	GBM.rec	L+M-1
CASSQESSIRGGYTF	1	6.98227e-05	LB4102T	GBM.rec	L2-IL7R-CD69-CD40L.T
CASSQGGGNQPQHF	1	6.98227e-05	LB4102T	GBM.rec	L6-Proliferating
CASSQGGPSLQETQYF	1	6.98227e-05	LB4143T	GBM.rec	L2-IL7R-CD69-CD40L.T
CASSQGRGTQETQYF	1	6.98227e-05	LB4177T	GBM.rec	L+M-1
CASSQGRQLYGYTF	1	6.98227e-05	LB4102T	GBM.rec	L6-Proliferating
CASSQGTGDEKLFF	1	6.98227e-05	LB4102T	GBM.rec	L6-Proliferating
CASSQILGGDEKLFF	1	6.98227e-05	LB4102T	GBM.rec	L1-GZMK.CD8A.T
CASSQILGTGELFF	1	6.98227e-05	LB4102T	GBM.rec	L2-IL7R-CD69-CD40L.T
CASSQNREGAAGANVLTF	1	6.98227e-05	LB4143T	GBM.rec	L4-Treg
CASSQTQGPDQPQHF	1	6.98227e-05	LB4102T	GBM.rec	L1-GZMK.CD8A.T
CASSQTRLAGGDYEQYF	1	6.98227e-05	LB4177T	GBM.rec	L+M-2
CASSQVAGDGNQPQHF	1	6.98227e-05	LB4102T	GBM.rec	L1-GZMK.CD8A.T
CASSQVEGWGGYNEQFF	1	6.98227e-05	LB4102T	GBM.rec	L+M-2
CASSQVGHNEKLFF	1	6.98227e-05	LB4102T	GBM.rec	L2-IL7R-CD69-CD40L.T
CASSQVRGGRREKLFF	1	6.98227e-05	LB3579T	GBM.rec	L+M-1
CASSQYYGATNEKLFF	1	6.98227e-05	LB4102T	GBM.rec	L+M-3
CASSRALGGNIQYF	1	6.98227e-05	LB4101T	GBM.rec	L1-GZMK.CD8A.T
CASSRDQNTEAFF	1	6.98227e-05	LB4143T	GBM.rec	L6-Proliferating
CASSRDRGSYEQYF	1	6.98227e-05	LB3958T	GBM.rec	L1-GZMK.CD8A.T
CASSRDRVNEQYF	1	6.98227e-05	LB4102T	GBM.rec	L+M-2
CASSRGLAGADTQYF	1	6.98227e-05	LB4102T	GBM.rec	L1-GZMK.CD8A.T
CASSRGQGAAGEQFF	1	6.98227e-05	LB4102T	GBM.rec	L1-GZMK.CD8A.T
CASSRLGTEAFF	1	6.98227e-05	LB4177T	GBM.rec	L1-GZMK.CD8A.T
CASSRPEANSPLHF	1	6.98227e-05	LB4102T	GBM.rec	L2-IL7R-CD69-CD40L.T
CASSRPRDQTSDTQYF	1	6.98227e-05	LB4177T	GBM.rec	L5-Tc/NK
CASSRREGWDTQYF	1	6.98227e-05	LB3958T	GBM.rec	L3-IL7R-TOX-TCF7.T
CASSRRQGYEQYF	1	6.98227e-05	LB3579T	GBM.rec	L2-IL7R-CD69-CD40L.T
CASSRSQGRAEGYTF	1	6.98227e-05	LB4101T	GBM.rec	L6-Proliferating
CASSRTGGDGYTF	1	6.98227e-05	LB4102T	GBM.rec	L5-Tc/NK
CASSRTPDRYNSPLHF	1	6.98227e-05	LB4102T	GBM.rec	Dying
CASSRTSGRAILETQYF	1	6.98227e-05	LB4143T	GBM.rec	L2-IL7R-CD69-CD40L.T
CASSRVKYEQYF	1	6.98227e-05	LB4143T	GBM.rec	L1-GZMK.CD8A.T
CASSSAGAGTQETQYF	1	6.98227e-05	LB4102T	GBM.rec	L1-GZMK.CD8A.T
CASSSDSLGCTQYF	1	6.98227e-05	LB4102T	GBM.rec	L1-GZMK.CD8A.T
CASSSEDQPQHF	1	6.98227e-05	LB4102T	GBM.rec	L2-IL7R-CD69-CD40L.T
CASSSGAVTGQPQHF	1	6.98227e-05	LB4102T	GBM.rec	L1-GZMK.CD8A.T
CASSSGELFF	1	6.98227e-05	LB4102T	GBM.rec	L1-GZMK.CD8A.T
CASSSGRNPEAFF	1	6.98227e-05	LB4102T	GBM.rec	L+M-2
CASSSKNRQSSYNSPLHF	1	6.98227e-05	LB4177T	GBM.rec	L2-IL7R-CD69-CD40L.T
CASSSLDSADDEQYF	1	6.98227e-05	LB4101T	GBM.rec	L3-IL7R-TOX-TCF7.T
CASSSLQGPNQPQHF	1	6.98227e-05	LB4102T	GBM.rec	L3-IL7R-TOX-TCF7.T
CASSSPGQQETQYF	1	6.98227e-05	LB4102T	GBM.rec	L+M-1
CASSSPRLAGDTGELFF	1	6.98227e-05	LB4101T	GBM.rec	L+M-1
CASSSPVGSYEQYF	1	6.98227e-05	LB4177T	GBM.rec	L+M-1
CASSSQGGGNQPQHF	1	6.98227e-05	LB4102T	GBM.rec	L+M-2
CASSSRGSFEQYF	1	6.98227e-05	LB4177T	GBM.rec	L2-IL7R-CD69-CD40L.T
CASSSRGVMDTQYF	1	6.98227e-05	LB4177T	GBM.rec	L2-IL7R-CD69-CD40L.T
CASSSRTSGYNEQFF	1	6.98227e-05	LB4102T	GBM.rec	L+M-2
CASSSRTVETQYF	1	6.98227e-05	LB4177T	GBM.rec	L+M-1
CASSSSSSGISYEQYF	1	6.98227e-05	LB4102T	GBM.rec	L1-GZMK.CD8A.T
CASSSSWGDTQYF	1	6.98227e-05	LB4101T	GBM.rec	L2-IL7R-CD69-CD40L.T
CASSSTARAPYNEQFF	1	6.98227e-05	LB4102T	GBM.rec	L+M-1
CASSSTAYEQFF	1	6.98227e-05	LB4177T	GBM.rec	L+M-1
CASSSTGAGYQPQHF	1	6.98227e-05	LB4101T	GBM.rec	L1-GZMK.CD8A.T
CASSSTGGGEGYTF	1	6.98227e-05	LB3964T	GBM.rec	L1-GZMK.CD8A.T
CASSSTGGNQPQHF	1	6.98227e-05	LB4102T	GBM.rec	L2-IL7R-CD69-CD40L.T
CASSSTSLGETQYF	1	6.98227e-05	LB4102T	GBM.rec	L2-IL7R-CD69-CD40L.T
CASSSVETGRGGYGYTF	1	6.98227e-05	LB4102T	GBM.rec	L4-Treg
CASSSVGSEQFF	1	6.98227e-05	LB4102T	GBM.rec	L1-GZMK.CD8A.T
CASSTDRRMNTEAFF	1	6.98227e-05	LB4102T	GBM.rec	L3-IL7R-TOX-TCF7.T
CASSTERYMGNTEAFF	1	6.98227e-05	LB4102T	GBM.rec	L6-Proliferating
CASSTGADGNTIYF	1	6.98227e-05	LB4101T	GBM.rec	L+M-1
CASSTQGHEQYF	1	6.98227e-05	LB4102T	GBM.rec	L1-GZMK.CD8A.T
CASSTTSESGYEQYF	1	6.98227e-05	LB4102T	GBM.rec	L1-GZMK.CD8A.T
CASSTTSGGPTDTQYF	1	6.98227e-05	LB4101T	GBM.rec	L1-GZMK.CD8A.T
CASSTWGTGSIDTQYF	1	6.98227e-05	LB4102T	GBM.rec	L2-IL7R-CD69-CD40L.T
CASSVDVVEYGYTF	1	6.98227e-05	LB4102T	GBM.rec	L5-Tc/NK
CASSVGQGINEQFF	1	6.98227e-05	LB4101T	GBM.rec	L+M-1
CASSVLLGSSYNEQFF	1	6.98227e-05	LB4101T	GBM.rec	L2-IL7R-CD69-CD40L.T
CASSVRTSGASTDTQYF	1	6.98227e-05	LB4177T	GBM.rec	L6-Proliferating
CASSVTFSGSPLHF	1	6.98227e-05	LB3958T	GBM.rec	L2-IL7R-CD69-CD40L.T
CASSVTGQGTTGELFF	1	6.98227e-05	LB4102T	GBM.rec	L4-Treg
CASSWGNREPQHF	1	6.98227e-05	LB4102T	GBM.rec	L2-IL7R-CD69-CD40L.T
CASSWGSSTSAYEQYF	1	6.98227e-05	LB4177T	GBM.rec	Dying
CASSWTGDNQPQHF	1	6.98227e-05	LB4102T	GBM.rec	L4-Treg
CASSWVDRSYGYTF	1	6.98227e-05	LB4143T	GBM.rec	L1-GZMK.CD8A.T
CASSYAFPTGGTSYNSPLHF	1	6.98227e-05	LB4102T	GBM.rec	L5-Tc/NK
CASSYDSGVGEQYF	1	6.98227e-05	LB3958T	GBM.rec	L3-IL7R-TOX-TCF7.T
CASSYGGEEQFF	1	6.98227e-05	LB4102T	GBM.rec	L1-GZMK.CD8A.T
CASSYGGGAWETQYF	1	6.98227e-05	LB4101T	GBM.rec	L1-GZMK.CD8A.T
CASSYGGNQPQHF	1	6.98227e-05	LB4102T	GBM.rec	L1-GZMK.CD8A.T
CASSYGHTSYEQYF	1	6.98227e-05	LB4143T	GBM.rec	L4-Treg
CASSYQGGRIYGYTF	1	6.98227e-05	LB4101T	GBM.rec	L6-Proliferating
CASSYSHPGAEAFF	1	6.98227e-05	LB4177T	GBM.rec	L2-IL7R-CD69-CD40L.T
CASSYSPRVGGYTF	1	6.98227e-05	LB4059T	GBM.rec	L+M-2
CASSYSRTGVYGYTF	1	6.98227e-05	LB3964T	GBM.rec	L+M-1
CASSYSYGTGRETQYF	1	6.98227e-05	LB4102T	GBM.rec	L1-GZMK.CD8A.T
CASTAGLAKTDTQYF	1	6.98227e-05	LB4101T	GBM.rec	L2-IL7R-CD69-CD40L.T
CASTDLMNTEAFF	1	6.98227e-05	LB4102T	GBM.rec	L+M-1
CASTPGYEQYF	1	6.98227e-05	LB4102T	GBM.rec	L1-GZMK.CD8A.T
CASTPPGDKRFSIYEQYF	1	6.98227e-05	LB4102T	GBM.rec	Dying
CASTRTPGYPLYEQYF	1	6.98227e-05	LB4177T	GBM.rec	L2-IL7R-CD69-CD40L.T
CASTRVQGIVTDTIYF	1	6.98227e-05	LB4102T	GBM.rec	L1-GZMK.CD8A.T
CASTSFGTGSTEAFF	1	6.98227e-05	LB4177T	GBM.rec	L+M-1
CASTSGGGETQYF	1	6.98227e-05	LB4102T	GBM.rec	L+M-1
CASTTDGSPTNTWELFF	1	6.98227e-05	LB4102T	GBM.rec	Dying
CASTTGMDGYTF	1	6.98227e-05	LB4102T	GBM.rec	L1-GZMK.CD8A.T
CASTYRDRGRTSYNEQFF	1	6.98227e-05	LB4102T	GBM.rec	L1-GZMK.CD8A.T
CATAGSVYEQYF	1	6.98227e-05	LB3964T	GBM.rec	L1-GZMK.CD8A.T
CATAGTASTDTQYF	1	6.98227e-05	LB4101T	GBM.rec	L+M-3
CATAPTYQETQFF	1	6.98227e-05	LB4102T	GBM.rec	L1-GZMK.CD8A.T
CATIPGSNTGELFF	1	6.98227e-05	LB4102T	GBM.rec	L2-IL7R-CD69-CD40L.T
CATNGAGGVNEQFF	1	6.98227e-05	LB4177T	GBM.rec	L3-IL7R-TOX-TCF7.T
CATRGGHEKLFF	1	6.98227e-05	LB4102T	GBM.rec	L2-IL7R-CD69-CD40L.T
CATSDHTDLGLAVPDTQYF	1	6.98227e-05	LB4102T	GBM.rec	L+M-1
CATSDLGQKGQFF	1	6.98227e-05	LB4102T	GBM.rec	L+M-1
CATSDLRGYTF	1	6.98227e-05	LB4177T	GBM.rec	L2-IL7R-CD69-CD40L.T
CATSRAGTDTQYF	1	6.98227e-05	LB4102T	GBM.rec	L1-GZMK.CD8A.T
CATSRDLTSNYGYTF	1	6.98227e-05	LB4102T	GBM.rec	Dying
CATSRDRVQGANSPLHF	1	6.98227e-05	LB4177T	GBM.rec	L1-GZMK.CD8A.T
CATSRPGNEKLFF	1	6.98227e-05	LB4102T	GBM.rec	L+M-1
CATSRWDRSNTEAFF	1	6.98227e-05	LB4101T	GBM.rec	L+M-1
CATSTGGLYNEQFF	1	6.98227e-05	LB4102T	GBM.rec	Dying
CATSTQGFPYEQYF	1	6.98227e-05	LB4102T	GBM.rec	L1-GZMK.CD8A.T
CAWNPSGEVGYTF	1	6.98227e-05	LB4143T	GBM.rec	L2-IL7R-CD69-CD40L.T
CAWSFDLTQYF	1	6.98227e-05	LB4102T	GBM.rec	L1-GZMK.CD8A.T
CAWSLRGNTIYF	1	6.98227e-05	LB4101T	GBM.rec	L4-Treg
CAWSPPPGKWDDGYTF	1	6.98227e-05	LB4102T	GBM.rec	L6-Proliferating
CAWSPPPGKWDDGYTV	1	6.98227e-05	LB4102T	GBM.rec	Dying
CDCSAATGGSAFF	1	6.98227e-05	LB4102T	GBM.rec	L1-GZMK.CD8A.T
CSADRALNYGYTF	1	6.98227e-05	LB4102T	GBM.rec	Dying
CSAGGLRSSYNSPLHF	1	6.98227e-05	LB4102T	GBM.rec	L+M-1
CSAIPGTGGEQNYEQYF	1	6.98227e-05	LB3958T	GBM.rec	L+M-1
CSALDLSYEQYF	1	6.98227e-05	LB4177T	GBM.rec	L1-GZMK.CD8A.T
CSALGLAGGETQYF	1	6.98227e-05	LB4143T	GBM.rec	L4-Treg
CSALLGGGRSSYEQYF	1	6.98227e-05	LB4102T	GBM.rec	L6-Proliferating
CSARDGTGNSPLHF	1	6.98227e-05	LB4102T	GBM.rec	L+M-1
CSARDTTGYNEQFF	1	6.98227e-05	LB4059T	GBM.rec	L1-GZMK.CD8A.T
CSARDVPSNTGELFF	1	6.98227e-05	LB4143T	GBM.rec	L4-Treg
CSAREAYSTDTQYF	1	6.98227e-05	LB3579T	GBM.rec	L6-Proliferating
CSAREPESGRAADTQYF	1	6.98227e-05	LB4102T	GBM.rec	L1-GZMK.CD8A.T
CSARGPGTASSYEQYF	1	6.98227e-05	LB4102T	GBM.rec	L+M-1
CSARGTDSGNTIYF	1	6.98227e-05	LB4102T	GBM.rec	L1-GZMK.CD8A.T
CSARPGTSLFGTDTQYF	1	6.98227e-05	LB4177T	GBM.rec	L+M-1
CSARPTARDRARIYNEQFF	1	6.98227e-05	LB4143T	GBM.rec	L6-Proliferating
CSARVGSEPGELFF	1	6.98227e-05	LB4143T	GBM.rec	L1-GZMK.CD8A.T
CSARVLQREIGEQFF	1	6.98227e-05	LB4102T	GBM.rec	L4-Treg
CSARYEAGANVLTF	1	6.98227e-05	LB4102T	GBM.rec	L+M-1
CSASERRSSYEQYF	1	6.98227e-05	LB4102T	GBM.rec	L+M-1
CSASGPPSGTEAFF	1	6.98227e-05	LB4101T	GBM.rec	L1-GZMK.CD8A.T
CSASGSRLGEQFF	1	6.98227e-05	LB4102T	GBM.rec	L+M-2
CSASLGVNEKLFF	1	6.98227e-05	LB4102T	GBM.rec	L4-Treg
CSASLGVNEKLFL	1	6.98227e-05	LB4102T	GBM.rec	L1-GZMK.CD8A.T
CSATSYGTQYF	1	6.98227e-05	LB4177T	GBM.rec	L3-IL7R-TOX-TCF7.T
CSAWTSGSGTYNEQFF	1	6.98227e-05	LB4102T	GBM.rec	Dying
CSAYYSGGAYNEQFF	1	6.98227e-05	LB4101T	GBM.rec	L2-IL7R-CD69-CD40L.T
CSGFRGVSTEAFF	1	6.98227e-05	LB4102T	GBM.rec	L6-Proliferating
CSGGLGGRNEQFF	1	6.98227e-05	LB4102T	GBM.rec	L6-Proliferating
CSGIPLGVNTEAFF	1	6.98227e-05	LB4177T	GBM.rec	L1-GZMK.CD8A.T
CSGVLAPQETQYF	1	6.98227e-05	LB4102T	GBM.rec	L6-Proliferating
CSSSSPQETQYF	1	6.98227e-05	LB4102T	GBM.rec	L+M-1
CSVASARGLETQYF	1	6.98227e-05	LB4102T	GBM.rec	L+M-2
CSVDSPGEDEKLFF	1	6.98227e-05	LB4102T	GBM.rec	L+M-3
CSVDWISYNEQFF	1	6.98227e-05	LB4102T	GBM.rec	L+M-2
CSVEAPVPGQGVYGYTF	1	6.98227e-05	LB4102T	GBM.rec	L6-Proliferating
CSVEGRSTYEQDF	1	6.98227e-05	LB4102T	GBM.rec	L+M-2
CSVEGTAGGDYGYTF	1	6.98227e-05	LB4177T	GBM.rec	L2-IL7R-CD69-CD40L.T
CSVLGQMRNTIYF	1	6.98227e-05	LB4102T	GBM.rec	L2-IL7R-CD69-CD40L.T
CSVSITNTGELFF	1	6.98227e-05	LB4102T	GBM.rec	L+M-2
CSVTGRSYGYTF	1	6.98227e-05	LB4177T	GBM.rec	L+M-1
CSVVSPNTEAFF	1	6.98227e-05	LB4102T	GBM.rec	L2-IL7R-CD69-CD40L.T
CSVWFTREQYF	1	6.98227e-05	LB4177T	GBM.rec	L+M-1
FASSHTAGETLFF	1	6.98227e-05	LB4102T	GBM.rec	L+M-1
RASSLLSGRDEQFF	1	6.98227e-05	LB4102T	GBM.rec	L+M-2
RASSLTLLAGDEQYF	1	6.98227e-05	LB3579T	GBM.rec	L1-GZMK.CD8A.T
SSATTGGETQYF	1	6.98227e-05	LB4102T	GBM.rec	L+M-2
YAISVCCGRVKSNEQFF	1	6.98227e-05	LB4102T	GBM.rec	L6-Proliferating
CASSLGTSGDYEQYF	14	0.000977517	LB3914T	GBM.pembro	L+M-1,L+M-2,L4-Treg,L1-GZMK.CD8A.T,L5-Tc/NK,L3-IL7R-TOX-TCF7.T,Dying
CASSQERGEQFF	8	0.000558581	LB3914T	GBM.pembro	L4-Treg,L1-GZMK.CD8A.T,L+M-2,L3-IL7R-TOX-TCF7.T,L+M-1,L5-Tc/NK
CASSFIRGQPQHF	8	0.000558581	LB4112T	GBM.pembro	L5-Tc/NK,L4-Treg,L7-pDC-Bcells,L3-IL7R-TOX-TCF7.T
CASSLPPTGPTDTQYF	7	0.000488759	LB4112T	GBM.pembro	L5-Tc/NK,L+M-2
CASSFGTSGRFGNEQFF	6	0.000418936	LB4112T	GBM.pembro	L6-Proliferating,L+M-1,L7-pDC-Bcells,L1-GZMK.CD8A.T
CASSMTSGAYNEQFF	5	0.000349113	LB3914T	GBM.pembro	L+M-1,L7-pDC-Bcells,L3-IL7R-TOX-TCF7.T,L1-GZMK.CD8A.T
CASSNSGTWGETQYF	5	0.000349113	LB3914T	GBM.pembro	L1-GZMK.CD8A.T
CASSQTQETQYF	5	0.000349113	LB3914T	GBM.pembro	L+M-1
CASSYGEGNEQYF	5	0.000349113	LB3914T	GBM.pembro	Dying,L3-IL7R-TOX-TCF7.T,L5-Tc/NK
CASSPARDSANEQYF	5	0.000349113	LB4112T	GBM.pembro	L5-Tc/NK,L2-IL7R-CD69-CD40L.T,L1-GZMK.CD8A.T,L3-IL7R-TOX-TCF7.T
CASSSGGANTGELFF	5	0.000349113	LB4112T	GBM.pembro	L+M-1,L1-GZMK.CD8A.T,L2-IL7R-CD69-CD40L.T
CASIPNRFSNYGYTF	4	0.000279291	LB3914T	GBM.pembro	L5-Tc/NK,L1-GZMK.CD8A.T,L2-IL7R-CD69-CD40L.T,L3-IL7R-TOX-TCF7.T
CASNLYRGSGANVLTF	4	0.000279291	LB3914T	GBM.pembro	L5-Tc/NK,L1-GZMK.CD8A.T,Dying,L+M-2
CASSQVAGGSDEQFF	4	0.000279291	LB3914T	GBM.pembro	L+M-2,L1-GZMK.CD8A.T,Dying
CATSRGPGASEDTQYF	4	0.000279291	LB3914T	GBM.pembro	L6-Proliferating,L2-IL7R-CD69-CD40L.T,L+M-1,L1-GZMK.CD8A.T
CASSRTATGELFF	4	0.000279291	LB4112T	GBM.pembro	L1-GZMK.CD8A.T,L2-IL7R-CD69-CD40L.T
CASSESRNTEAFF	3	0.000209468	LB3914T	GBM.pembro	L2-IL7R-CD69-CD40L.T,L1-GZMK.CD8A.T,L+M-2
CASSLNGRELFF	3	0.000209468	LB3914T	GBM.pembro	L1-GZMK.CD8A.T,L+M-1
CASSPAGGDTDTQYF	3	0.000209468	LB3914T	GBM.pembro	L4-Treg,L3-IL7R-TOX-TCF7.T,L+M-2
CASSQDGAGGLGEQYF	3	0.000209468	LB3914T	GBM.pembro	L+M-1,L2-IL7R-CD69-CD40L.T,Dying
CASSQDSGGAGEQFF	3	0.000209468	LB3914T	GBM.pembro	L+M-2,L1-GZMK.CD8A.T
CATSDNKEQYF	3	0.000209468	LB3914T	GBM.pembro	L+M-1,L+M-2
CASSQGGGLPQHF	3	0.000209468	LB4075T	GBM.pembro	L7-pDC-Bcells,L2-IL7R-CD69-CD40L.T,L+M-2
CASSERWLATNTGELFF	3	0.000209468	LB4112T	GBM.pembro	L+M-1,L+M-2,L6-Proliferating
CASSQQNTEAFF	3	0.000209468	LB4112T	GBM.pembro	L1-GZMK.CD8A.T,L5-Tc/NK
CASSQVLMATQYF	3	0.000209468	LB4112T	GBM.pembro	L1-GZMK.CD8A.T,L+M-2,L5-Tc/NK
CASGESTGELFF	2	0.000139645	LB3872T	GBM.pembro	L+M-1,L4-Treg
CASSDPGTGGTEAFF	2	0.000139645	LB3914T	GBM.pembro	L3-IL7R-TOX-TCF7.T,L4-Treg
CASSESANYGYTF	2	0.000139645	LB3914T	GBM.pembro	L1-GZMK.CD8A.T,L+M-2
CASSLDRGTDTQYF	2	0.000139645	LB3914T	GBM.pembro	L4-Treg,L+M-1
CASSLIGAAATQYF	2	0.000139645	LB3914T	GBM.pembro	L+M-1
CASSMGTSGIFTDTQYF	2	0.000139645	LB3914T	GBM.pembro	L3-IL7R-TOX-TCF7.T,L5-Tc/NK
CASSPFPGMNTEAFF	2	0.000139645	LB3914T	GBM.pembro	L+M-1,L3-IL7R-TOX-TCF7.T
CASSPNTNEQFF	2	0.000139645	LB3914T	GBM.pembro	L+M-1
CASSPTGTGDNTGELFF	2	0.000139645	LB3914T	GBM.pembro	L3-IL7R-TOX-TCF7.T
CASSQGLAGGFGTQYF	2	0.000139645	LB3914T	GBM.pembro	Dying,L+M-2
CASSRLGLAGLRETQYF	2	0.000139645	LB3914T	GBM.pembro	Dying,L6-Proliferating
CASSRTGNTEAFF	2	0.000139645	LB3914T	GBM.pembro	L1-GZMK.CD8A.T,Dying
CASSSPTGGISYNSPLHF	2	0.000139645	LB3914T	GBM.pembro	L4-Treg
CASSTRDGPLNEQFF	2	0.000139645	LB3914T	GBM.pembro	L+M-1
CASSVAGGTEAFF	2	0.000139645	LB3914T	GBM.pembro	L4-Treg,L+M-1
CASSVGGTDTGELFF	2	0.000139645	LB3914T	GBM.pembro	L+M-2,L6-Proliferating
CASTGYQETQYF	2	0.000139645	LB3914T	GBM.pembro	L6-Proliferating,L+M-1
CATSDLSINQPQHF	2	0.000139645	LB3914T	GBM.pembro	L+M-1,L4-Treg
CSANGGARGEQFF	2	0.000139645	LB3914T	GBM.pembro	L+M-2,L6-Proliferating
CSASSYRAELSYEQYF	2	0.000139645	LB3914T	GBM.pembro	L1-GZMK.CD8A.T,L3-IL7R-TOX-TCF7.T
RASSLYRGSNQPQHF	2	0.000139645	LB3914T	GBM.pembro	L6-Proliferating
RASVLAGGLNIQYF	2	0.000139645	LB3914T	GBM.pembro	L+M-2,L3-IL7R-TOX-TCF7.T
CASGATGNTIYF	2	0.000139645	LB4006T	GBM.pembro	L1-GZMK.CD8A.T
CASSIGGGLNQPQHF	2	0.000139645	LB4006T	GBM.pembro	L+M-1,L+M-2
CASSQDLGIAYEQYF	2	0.000139645	LB4006T	GBM.pembro	L2-IL7R-CD69-CD40L.T,Dying
CASSASVTDTQYF	2	0.000139645	LB4112T	GBM.pembro	L2-IL7R-CD69-CD40L.T
CASSFAGQGRFF	2	0.000139645	LB4112T	GBM.pembro	L6-Proliferating
CASSLSYLADTGELFF	2	0.000139645	LB4112T	GBM.pembro	L1-GZMK.CD8A.T
CASSPHDEGDTEAFF	2	0.000139645	LB4112T	GBM.pembro	L+M-1
CASSRADGEKLFF	2	0.000139645	LB4112T	GBM.pembro	L+M-1,L4-Treg
CASSSRPGITEAFF	2	0.000139645	LB4112T	GBM.pembro	L4-Treg
CASTKPGTYEQYF	2	0.000139645	LB4112T	GBM.pembro	L6-Proliferating,L4-Treg
CATSRDFTINGTDPGGTQYF	2	0.000139645	LB4112T	GBM.pembro	L1-GZMK.CD8A.T,L2-IL7R-CD69-CD40L.T
CATSSDEGGVNEKLFF	2	0.000139645	LB4112T	GBM.pembro	L2-IL7R-CD69-CD40L.T,L1-GZMK.CD8A.T
CALGNTGNQFYF	2	0.000139645	LB4117T	GBM.pembro	L1-GZMK.CD8A.T,L2-IL7R-CD69-CD40L.T
CASRSKTGSLSPQHF	2	0.000139645	LB4117T	GBM.pembro	L3-IL7R-TOX-TCF7.T,L+M-1
CASSAGGGYEQYF	2	0.000139645	LB4117T	GBM.pembro	L2-IL7R-CD69-CD40L.T
CASSLDIGQGKAWQYF	2	0.000139645	LB4117T	GBM.pembro	L6-Proliferating,L+M-1
CASSRLAGAQNTGELFF	2	0.000139645	LB4117T	GBM.pembro	L4-Treg
CAAGTGPVYNEQFF	1	6.98227e-05	LB4112T	GBM.pembro	L1-GZMK.CD8A.T
CAGQNMNTEAFF	1	6.98227e-05	LB4117T	GBM.pembro	L2-IL7R-CD69-CD40L.T
CAIEDGGGYTF	1	6.98227e-05	LB4112T	GBM.pembro	L1-GZMK.CD8A.T
CAIGASGSSEQFF	1	6.98227e-05	LB4112T	GBM.pembro	L+M-1
CAIKGDASNQPQHF	1	6.98227e-05	LB3914T	GBM.pembro	L2-IL7R-CD69-CD40L.T
CAIRPGQDNQPQHF	1	6.98227e-05	LB4117T	GBM.pembro	L+M-1
CAISEDSTPQETQYF	1	6.98227e-05	LB3914T	GBM.pembro	L+M-2
CAISEFSANTGELFF	1	6.98227e-05	LB3914T	GBM.pembro	L2-IL7R-CD69-CD40L.T
CAISEGTDSNQPQHF	1	6.98227e-05	LB3667T	GBM.pembro	L1-GZMK.CD8A.T
CAISERGLGYTEAFF	1	6.98227e-05	LB4075T	GBM.pembro	Dying
CAISESEASSYEQYF	1	6.98227e-05	LB3667T	GBM.pembro	L2-IL7R-CD69-CD40L.T
CAISESGEETQYF	1	6.98227e-05	LB4117T	GBM.pembro	L1-GZMK.CD8A.T
CAISEVLGTANEKLFF	1	6.98227e-05	LB4112T	GBM.pembro	L+M-1
CAISSGTDSYEQYF	1	6.98227e-05	LB3914T	GBM.pembro	L+M-1
CAISYEGTGSYDQYF	1	6.98227e-05	LB4117T	GBM.pembro	L+M-3
CALGELGQAGTALIF	1	6.98227e-05	LB4112T	GBM.pembro	L2-IL7R-CD69-CD40L.T
CASALSYNEQFF	1	6.98227e-05	LB3864T	GBM.pembro	L4-Treg
CASDGSTGELFF	1	6.98227e-05	LB4117T	GBM.pembro	L1-GZMK.CD8A.T
CASFLTSGNRVNEQFF	1	6.98227e-05	LB4112T	GBM.pembro	L2-IL7R-CD69-CD40L.T
CASGEGLDEQFF	1	6.98227e-05	LB3914T	GBM.pembro	L+M-2
CASGGNYGYTF	1	6.98227e-05	LB4112T	GBM.pembro	L2-IL7R-CD69-CD40L.T
CASGGVNQPQHF	1	6.98227e-05	LB3914T	GBM.pembro	Dying
CASGIGGSQETQYF	1	6.98227e-05	LB3914T	GBM.pembro	L+M-1
CASGLGTEAFF	1	6.98227e-05	LB4112T	GBM.pembro	L1-GZMK.CD8A.T
CASGPGDTQYF	1	6.98227e-05	LB4112T	GBM.pembro	L6-Proliferating
CASGPGYSYNSPLHF	1	6.98227e-05	LB3914T	GBM.pembro	L4-Treg
CASGQPNGELFF	1	6.98227e-05	LB4006T	GBM.pembro	Dying
CASGRTDTQYF	1	6.98227e-05	LB3914T	GBM.pembro	L5-Tc/NK
CASGTGGAGTDTQYF	1	6.98227e-05	LB3914T	GBM.pembro	L+M-1
CASIKGGGITGELFF	1	6.98227e-05	LB3914T	GBM.pembro	L4-Treg
CASINWNGVQAQYF	1	6.98227e-05	LB3914T	GBM.pembro	L1-GZMK.CD8A.T
CASIRASGTQYF	1	6.98227e-05	LB3667T	GBM.pembro	L2-IL7R-CD69-CD40L.T
CASKDSSYEQYF	1	6.98227e-05	LB4075T	GBM.pembro	L1-GZMK.CD8A.T
CASKPGAGDSYEQYF	1	6.98227e-05	LB4112T	GBM.pembro	Dying
CASKSGQINTGELFF	1	6.98227e-05	LB3914T	GBM.pembro	L2-IL7R-CD69-CD40L.T
CASMNNNEQFF	1	6.98227e-05	LB3872T	GBM.pembro	L+M-2
CASNNAGGVLDNGYTF	1	6.98227e-05	LB4075T	GBM.pembro	L1-GZMK.CD8A.T
CASPPSGGPWEQYF	1	6.98227e-05	LB4112T	GBM.pembro	L1-GZMK.CD8A.T
CASRDPGQGVYEQYF	1	6.98227e-05	LB4112T	GBM.pembro	L6-Proliferating
CASRFTGGYNYEQYF	1	6.98227e-05	LB3914T	GBM.pembro	Dying
CASRGLAGGQETQYF	1	6.98227e-05	LB4117T	GBM.pembro	L2-IL7R-CD69-CD40L.T
CASRGLAVNEQYF	1	6.98227e-05	LB4112T	GBM.pembro	L2-IL7R-CD69-CD40L.T
CASRKDYRSSAKEQFF	1	6.98227e-05	LB4112T	GBM.pembro	L2-IL7R-CD69-CD40L.T
CASRKGMNTGELFF	1	6.98227e-05	LB3914T	GBM.pembro	L6-Proliferating
CASRLAPAVDRGYEQYF	1	6.98227e-05	LB3914T	GBM.pembro	L2-IL7R-CD69-CD40L.T
CASRLKAGRVAISGANVLTF	1	6.98227e-05	LB4025T	GBM.pembro	Dying
CASRLRDRGNEQFF	1	6.98227e-05	LB4112T	GBM.pembro	L4-Treg
CASRNNANQPQHF	1	6.98227e-05	LB3914T	GBM.pembro	L4-Treg
CASRNYILGSSDTQYF	1	6.98227e-05	LB4112T	GBM.pembro	L+M-1
CASRPLLGGSSYEQYF	1	6.98227e-05	LB4003T	GBM.pembro	L5-Tc/NK
CASRQGSYNSPLHF	1	6.98227e-05	LB3914T	GBM.pembro	L4-Treg
CASRRETGVGNTIYF	1	6.98227e-05	LB3914T	GBM.pembro	L1-GZMK.CD8A.T
CASRRGANYGYTF	1	6.98227e-05	LB3914T	GBM.pembro	L2-IL7R-CD69-CD40L.T
CASRRRQGANSPLHF	1	6.98227e-05	LB4025T	GBM.pembro	L2-IL7R-CD69-CD40L.T
CASRSGGEYEQYF	1	6.98227e-05	LB3914T	GBM.pembro	L2-IL7R-CD69-CD40L.T
CASRSLGQAQHF	1	6.98227e-05	LB4075T	GBM.pembro	L3-IL7R-TOX-TCF7.T
CASRSPRGQETQYF	1	6.98227e-05	LB4025T	GBM.pembro	L3-IL7R-TOX-TCF7.T
CASRTGGDEQFF	1	6.98227e-05	LB4117T	GBM.pembro	L5-Tc/NK
CASRTQVNPSDRAEAFF	1	6.98227e-05	LB3914T	GBM.pembro	L4-Treg
CASRVGTGWIHYGYTF	1	6.98227e-05	LB4112T	GBM.pembro	L+M-1
CASRWGQGPGELFF	1	6.98227e-05	LB4112T	GBM.pembro	L4-Treg
CASRYPGQGGGKDEAFF	1	6.98227e-05	LB3914T	GBM.pembro	L4-Treg
CASSADRVANYGYTF	1	6.98227e-05	LB3914T	GBM.pembro	L+M-1
CASSAFGDTASGNTIYF	1	6.98227e-05	LB3914T	GBM.pembro	L+M-1
CASSAFLTDEQYF	1	6.98227e-05	LB3914T	GBM.pembro	L5-Tc/NK
CASSAGRGRRDDTQYF	1	6.98227e-05	LB4112T	GBM.pembro	L2-IL7R-CD69-CD40L.T
CASSALAGGRSGANVLTF	1	6.98227e-05	LB4003T	GBM.pembro	L3-IL7R-TOX-TCF7.T
CASSALVGSTDTQYF	1	6.98227e-05	LB3914T	GBM.pembro	L+M-1
CASSAPGREYF	1	6.98227e-05	LB3914T	GBM.pembro	L2-IL7R-CD69-CD40L.T
CASSAPTGVGEKLFF	1	6.98227e-05	LB4112T	GBM.pembro	L+M-1
CASSDGLAGPYEQYF	1	6.98227e-05	LB4112T	GBM.pembro	L6-Proliferating
CASSDPPHEQFF	1	6.98227e-05	LB3914T	GBM.pembro	L+M-1
CASSDRGVGNQPQHF	1	6.98227e-05	LB4112T	GBM.pembro	L4-Treg
CASSDSLPSGGLSYNEQFF	1	6.98227e-05	LB4075T	GBM.pembro	L1-GZMK.CD8A.T
CASSDTSGSDTQYF	1	6.98227e-05	LB4117T	GBM.pembro	L+M-1
CASSEASGAGGLHEQYF	1	6.98227e-05	LB4112T	GBM.pembro	L4-Treg
CASSEDGYTF	1	6.98227e-05	LB4112T	GBM.pembro	L6-Proliferating
CASSEGQGRTLNGYTF	1	6.98227e-05	LB3914T	GBM.pembro	L2-IL7R-CD69-CD40L.T
CASSEGTGREKLFF	1	6.98227e-05	LB3914T	GBM.pembro	L3-IL7R-TOX-TCF7.T
CASSEGWRTEAFF	1	6.98227e-05	LB4112T	GBM.pembro	L+M-2
CASSELPGTGDKCGYTF	1	6.98227e-05	LB4112T	GBM.pembro	L1-GZMK.CD8A.T
CASSERGASYEQYF	1	6.98227e-05	LB3914T	GBM.pembro	L+M-1
CASSESTTDEQYF	1	6.98227e-05	LB4112T	GBM.pembro	L+M-1
CASSETGETQYF	1	6.98227e-05	LB3914T	GBM.pembro	L1-GZMK.CD8A.T
CASSETGQGSGYTF	1	6.98227e-05	LB3914T	GBM.pembro	L2-IL7R-CD69-CD40L.T
CASSETSGGANEQFF	1	6.98227e-05	LB3914T	GBM.pembro	L+M-3
CASSEVKATDTQYF	1	6.98227e-05	LB3914T	GBM.pembro	L4-Treg
CASSEVQGLNTEAFF	1	6.98227e-05	LB3667T	GBM.pembro	L2-IL7R-CD69-CD40L.T
CASSEWDRPNSEAFF	1	6.98227e-05	LB4075T	GBM.pembro	L3-IL7R-TOX-TCF7.T
CASSEWGGLNNEQFF	1	6.98227e-05	LB3914T	GBM.pembro	L2-IL7R-CD69-CD40L.T
CASSEYGERGYTF	1	6.98227e-05	LB4117T	GBM.pembro	L4-Treg
CASSFAGLARTDTQYF	1	6.98227e-05	LB3914T	GBM.pembro	L4-Treg
CASSFDEEGNQPQHF	1	6.98227e-05	LB3914T	GBM.pembro	L4-Treg
CASSFDRGSEQFF	1	6.98227e-05	LB4112T	GBM.pembro	L1-GZMK.CD8A.T
CASSFGGLAGVGEQFF	1	6.98227e-05	LB4112T	GBM.pembro	L4-Treg
CASSFGLADLNEQFF	1	6.98227e-05	LB4112T	GBM.pembro	L1-GZMK.CD8A.T
CASSFGQESYGYTF	1	6.98227e-05	LB4117T	GBM.pembro	L1-GZMK.CD8A.T
CASSFGRFGGTGELFF	1	6.98227e-05	LB4117T	GBM.pembro	L1-GZMK.CD8A.T
CASSFGSPDTQYF	1	6.98227e-05	LB3914T	GBM.pembro	L+M-1
CASSFIAGGYNEQFF	1	6.98227e-05	LB3914T	GBM.pembro	L+M-1
CASSFLGSGTSSTDTQYF	1	6.98227e-05	LB4112T	GBM.pembro	L2-IL7R-CD69-CD40L.T
CASSFPGTELSSYEQYF	1	6.98227e-05	LB3914T	GBM.pembro	L3-IL7R-TOX-TCF7.T
CASSFPSGSSYNEQFF	1	6.98227e-05	LB3914T	GBM.pembro	L3-IL7R-TOX-TCF7.T
CASSFPSMRPDTQYF	1	6.98227e-05	LB3914T	GBM.pembro	L+M-2
CASSFQGGDETQYF	1	6.98227e-05	LB3914T	GBM.pembro	L1-GZMK.CD8A.T
CASSFQGPNTEAFF	1	6.98227e-05	LB3914T	GBM.pembro	L+M-2
CASSFQGPSYEQYF	1	6.98227e-05	LB4117T	GBM.pembro	L1-GZMK.CD8A.T
CASSFQGYEQYF	1	6.98227e-05	LB4025T	GBM.pembro	L1-GZMK.CD8A.T
CASSFQTREKLFF	1	6.98227e-05	LB4112T	GBM.pembro	L7-pDC-Bcells
CASSFSGLSYNEQFF	1	6.98227e-05	LB4003T	GBM.pembro	L3-IL7R-TOX-TCF7.T
CASSFSGNSNQPQHF	1	6.98227e-05	LB3914T	GBM.pembro	L6-Proliferating
CASSFSGQGIEAFF	1	6.98227e-05	LB3914T	GBM.pembro	L+M-2
CASSFTGSLSNSPLHF	1	6.98227e-05	LB4025T	GBM.pembro	L4-Treg
CASSFTSGGARDEQFF	1	6.98227e-05	LB4117T	GBM.pembro	L6-Proliferating
CASSFYGSFDEQFF	1	6.98227e-05	LB3667T	GBM.pembro	L2-IL7R-CD69-CD40L.T
CASSGAYEQYF	1	6.98227e-05	LB3667T	GBM.pembro	L2-IL7R-CD69-CD40L.T
CASSGLIPYEQYF	1	6.98227e-05	LB3914T	GBM.pembro	L+M-3
CASSGLPEAFF	1	6.98227e-05	LB3914T	GBM.pembro	L3-IL7R-TOX-TCF7.T
CASSGQGGAPGANVLTF	1	6.98227e-05	LB4112T	GBM.pembro	L+M-1
CASSGQGTNIQYF	1	6.98227e-05	LB3914T	GBM.pembro	L+M-2
CASSGRISTDTQYF	1	6.98227e-05	LB4112T	GBM.pembro	L6-Proliferating
CASSGRRHAGSPLHF	1	6.98227e-05	LB4112T	GBM.pembro	Dying
CASSGSRTGIPYEQYF	1	6.98227e-05	LB4112T	GBM.pembro	L2-IL7R-CD69-CD40L.T
CASSHEGGYGYTF	1	6.98227e-05	LB3914T	GBM.pembro	L2-IL7R-CD69-CD40L.T
CASSHGGTSPNSPLHF	1	6.98227e-05	LB3914T	GBM.pembro	L3-IL7R-TOX-TCF7.T
CASSHGLMNTEAFF	1	6.98227e-05	LB3914T	GBM.pembro	L3-IL7R-TOX-TCF7.T
CASSHNPTGYEQFF	1	6.98227e-05	LB3914T	GBM.pembro	L1-GZMK.CD8A.T
CASSHPAQSYGYTF	1	6.98227e-05	LB3914T	GBM.pembro	L2-IL7R-CD69-CD40L.T
CASSHSYEQYF	1	6.98227e-05	LB3864T	GBM.pembro	L5-Tc/NK
CASSHVDGGGETQYF	1	6.98227e-05	LB3667T	GBM.pembro	L+M-1
CASSHVLGRETQYF	1	6.98227e-05	LB3914T	GBM.pembro	L+M-3
CASSIAEQFF	1	6.98227e-05	LB3914T	GBM.pembro	L1-GZMK.CD8A.T
CASSIDRERGQPQHF	1	6.98227e-05	LB3914T	GBM.pembro	L3-IL7R-TOX-TCF7.T
CASSIGPTGVQPQHF	1	6.98227e-05	LB4112T	GBM.pembro	L+M-1
CASSIGVGNEQYF	1	6.98227e-05	LB3914T	GBM.pembro	L+M-1
CASSIPTFSAGGRAFF	1	6.98227e-05	LB4075T	GBM.pembro	L+M-2
CASSISSGDYNEQFF	1	6.98227e-05	LB3914T	GBM.pembro	L5-Tc/NK
CASSITGSGEQFF	1	6.98227e-05	LB3914T	GBM.pembro	L+M-2
CASSITGTHEQYF	1	6.98227e-05	LB3914T	GBM.pembro	L1-GZMK.CD8A.T
CASSIVGGRLTDTQYF	1	6.98227e-05	LB3914T	GBM.pembro	L+M-1
CASSIWEDTQYF	1	6.98227e-05	LB4112T	GBM.pembro	L6-Proliferating
CASSKGGGSYNEQFF	1	6.98227e-05	LB4117T	GBM.pembro	L6-Proliferating
CASSKIGQNTGELFF	1	6.98227e-05	LB4112T	GBM.pembro	L+M-1
CASSKSPGVDYGSTF	1	6.98227e-05	LB3914T	GBM.pembro	L2-IL7R-CD69-CD40L.T
CASSKTGPGELFF	1	6.98227e-05	LB4025T	GBM.pembro	L3-IL7R-TOX-TCF7.T
CASSLAARGASPLHF	1	6.98227e-05	LB3914T	GBM.pembro	L+M-2
CASSLADRNTGELFF	1	6.98227e-05	LB3914T	GBM.pembro	L1-GZMK.CD8A.T
CASSLADSYEQYF	1	6.98227e-05	LB3914T	GBM.pembro	L+M-2
CASSLAGEQYF	1	6.98227e-05	LB3914T	GBM.pembro	L4-Treg
CASSLAGETQYF	1	6.98227e-05	LB4112T	GBM.pembro	L+M-1
CASSLAGKQDTQYF	1	6.98227e-05	LB3864T	GBM.pembro	L2-IL7R-CD69-CD40L.T
CASSLAGQGSTDTQYF	1	6.98227e-05	LB4112T	GBM.pembro	L6-Proliferating
CASSLAGTPYEQYF	1	6.98227e-05	LB4025T	GBM.pembro	L+M-2
CASSLAGVLSGNTIYF	1	6.98227e-05	LB3914T	GBM.pembro	L2-IL7R-CD69-CD40L.T
CASSLAPGRIIEGYTF	1	6.98227e-05	LB3914T	GBM.pembro	Dying
CASSLARTGDIGYEAFF	1	6.98227e-05	LB4117T	GBM.pembro	L1-GZMK.CD8A.T
CASSLDENYGYTF	1	6.98227e-05	LB3914T	GBM.pembro	L+M-1
CASSLDGGTQYF	1	6.98227e-05	LB3914T	GBM.pembro	L2-IL7R-CD69-CD40L.T
CASSLDGTNEQFF	1	6.98227e-05	LB3914T	GBM.pembro	L+M-2
CASSLDLSGGEADTQYF	1	6.98227e-05	LB3914T	GBM.pembro	Dying
CASSLDQGKSETQYF	1	6.98227e-05	LB4112T	GBM.pembro	L2-IL7R-CD69-CD40L.T
CASSLDSGSGTDTQYF	1	6.98227e-05	LB4025T	GBM.pembro	Dying
CASSLDSSGNTIYF	1	6.98227e-05	LB4112T	GBM.pembro	L1-GZMK.CD8A.T
CASSLEAFWGSYNEQFF	1	6.98227e-05	LB4112T	GBM.pembro	L+M-1
CASSLEGGAYEQYF	1	6.98227e-05	LB3914T	GBM.pembro	Dying
CASSLEGRAYNEQFF	1	6.98227e-05	LB3914T	GBM.pembro	L3-IL7R-TOX-TCF7.T
CASSLEGYNEQFF	1	6.98227e-05	LB4112T	GBM.pembro	L1-GZMK.CD8A.T
CASSLELAGGRDTQYF	1	6.98227e-05	LB4075T	GBM.pembro	L6-Proliferating
CASSLEPDTQYF	1	6.98227e-05	LB3914T	GBM.pembro	L3-IL7R-TOX-TCF7.T
CASSLETNYEAFF	1	6.98227e-05	LB4117T	GBM.pembro	L2-IL7R-CD69-CD40L.T
CASSLGAPNEQFF	1	6.98227e-05	LB4112T	GBM.pembro	L1-GZMK.CD8A.T
CASSLGDTEAFF	1	6.98227e-05	LB4075T	GBM.pembro	L3-IL7R-TOX-TCF7.T
CASSLGGAVEQFF	1	6.98227e-05	LB3914T	GBM.pembro	L3-IL7R-TOX-TCF7.T
CASSLGGFNQPQHF	1	6.98227e-05	LB3864T	GBM.pembro	L+M-1
CASSLGGGRTGELFF	1	6.98227e-05	LB3914T	GBM.pembro	L4-Treg
CASSLGNGDESPLHF	1	6.98227e-05	LB3914T	GBM.pembro	L1-GZMK.CD8A.T
CASSLGPADNEQFF	1	6.98227e-05	LB4006T	GBM.pembro	L+M-2
CASSLGQGEETQYF	1	6.98227e-05	LB4025T	GBM.pembro	L3-IL7R-TOX-TCF7.T
CASSLGREYGYTF	1	6.98227e-05	LB3864T	GBM.pembro	L1-GZMK.CD8A.T
CASSLGRNTEAFF	1	6.98227e-05	LB4006T	GBM.pembro	L1-GZMK.CD8A.T
CASSLGRSSGGQETQYF	1	6.98227e-05	LB3914T	GBM.pembro	L4-Treg
CASSLGSSSYNEQFF	1	6.98227e-05	LB4006T	GBM.pembro	L3-IL7R-TOX-TCF7.T
CASSLGTGRNSPLHF	1	6.98227e-05	LB3914T	GBM.pembro	L2-IL7R-CD69-CD40L.T
CASSLGTSGAFTDTQYF	1	6.98227e-05	LB3914T	GBM.pembro	L+M-1
CASSLGVAEQETQYF	1	6.98227e-05	LB4112T	GBM.pembro	L+M-3
CASSLIGGPNTEAFF	1	6.98227e-05	LB4075T	GBM.pembro	L3-IL7R-TOX-TCF7.T
CASSLITSSDEQFF	1	6.98227e-05	LB4112T	GBM.pembro	L3-IL7R-TOX-TCF7.T
CASSLLAGGRTDTQYF	1	6.98227e-05	LB3914T	GBM.pembro	L+M-1
CASSLNPQGGGQPQHF	1	6.98227e-05	LB3914T	GBM.pembro	L+M-2
CASSLNQGTEAFF	1	6.98227e-05	LB3914T	GBM.pembro	L4-Treg
CASSLPGAAAGNTIYF	1	6.98227e-05	LB3667T	GBM.pembro	L4-Treg
CASSLPPGPERAVHF	1	6.98227e-05	LB3914T	GBM.pembro	L1-GZMK.CD8A.T
CASSLPPPSSGANVLTF	1	6.98227e-05	LB3667T	GBM.pembro	L1-GZMK.CD8A.T
CASSLPRRGANVLTF	1	6.98227e-05	LB3872T	GBM.pembro	L2-IL7R-CD69-CD40L.T
CASSLQGATEAFF	1	6.98227e-05	LB3914T	GBM.pembro	L+M-2
CASSLRDLGTDTQYF	1	6.98227e-05	LB4112T	GBM.pembro	L6-Proliferating
CASSLRGDEKLFF	1	6.98227e-05	LB4006T	GBM.pembro	Dying
CASSLRGQANTGELFF	1	6.98227e-05	LB4112T	GBM.pembro	L1-GZMK.CD8A.T
CASSLSAGDAYYEQYF	1	6.98227e-05	LB3667T	GBM.pembro	L6-Proliferating
CASSLSDYYGYTF	1	6.98227e-05	LB4003T	GBM.pembro	L1-GZMK.CD8A.T
CASSLSGGPLNEQYF	1	6.98227e-05	LB3667T	GBM.pembro	L+M-1
CASSLSGQEFYNEQFF	1	6.98227e-05	LB3914T	GBM.pembro	L+M-1
CASSLSGVDTQYF	1	6.98227e-05	LB4112T	GBM.pembro	L2-IL7R-CD69-CD40L.T
CASSLSKGAGTGELFF	1	6.98227e-05	LB3914T	GBM.pembro	L1-GZMK.CD8A.T
CASSLSLAGNQETQYF	1	6.98227e-05	LB3914T	GBM.pembro	L1-GZMK.CD8A.T
CASSLSRQYNSPLHF	1	6.98227e-05	LB3667T	GBM.pembro	L2-IL7R-CD69-CD40L.T
CASSLSSGVSYNEQFF	1	6.98227e-05	LB4025T	GBM.pembro	L6-Proliferating
CASSLSTYEQYF	1	6.98227e-05	LB4112T	GBM.pembro	L+M-1
CASSLSYVTNQPQHF	1	6.98227e-05	LB3914T	GBM.pembro	L2-IL7R-CD69-CD40L.T
CASSLTGTDEQFF	1	6.98227e-05	LB4112T	GBM.pembro	L1-GZMK.CD8A.T
CASSLTPGAGSEQFF	1	6.98227e-05	LB4117T	GBM.pembro	L5-Tc/NK
CASSLTPNPTDTQYF	1	6.98227e-05	LB3914T	GBM.pembro	L2-IL7R-CD69-CD40L.T
CASSLTSGDYNEQFF	1	6.98227e-05	LB3667T	GBM.pembro	L+M-1
CASSLVETGDSNEQYF	1	6.98227e-05	LB3914T	GBM.pembro	L1-GZMK.CD8A.T
CASSLVGGPRISYNEQFF	1	6.98227e-05	LB4112T	GBM.pembro	L1-GZMK.CD8A.T
CASSLVGKEQFF	1	6.98227e-05	LB4112T	GBM.pembro	L6-Proliferating
CASSLVGREGPYEQYF	1	6.98227e-05	LB4112T	GBM.pembro	L2-IL7R-CD69-CD40L.T
CASSLVIGGRTDTQYF	1	6.98227e-05	LB3914T	GBM.pembro	L+M-2
CASSLVSGETQYF	1	6.98227e-05	LB4112T	GBM.pembro	L5-Tc/NK
CASSLVSLNTEAFF	1	6.98227e-05	LB3914T	GBM.pembro	L+M-2
CASSLVSYTEAFF	1	6.98227e-05	LB4025T	GBM.pembro	L+M-1
CASSLWAGETQYF	1	6.98227e-05	LB3914T	GBM.pembro	Dying
CASSLWTGANYGYTF	1	6.98227e-05	LB4112T	GBM.pembro	L6-Proliferating
CASSLWTQGTGELFF	1	6.98227e-05	LB3914T	GBM.pembro	L4-Treg
CASSLWTSGGYNEQFF	1	6.98227e-05	LB4075T	GBM.pembro	L+M-2
CASSLYQAFSNTGELFF	1	6.98227e-05	LB4112T	GBM.pembro	L5-Tc/NK
CASSMEGWSYNEQFF	1	6.98227e-05	LB4112T	GBM.pembro	L6-Proliferating
CASSMEIERTPEQFF	1	6.98227e-05	LB4117T	GBM.pembro	L2-IL7R-CD69-CD40L.T
CASSMFGTNTVALF	1	6.98227e-05	LB3914T	GBM.pembro	L+M-2
CASSMSLYEQYF	1	6.98227e-05	LB3914T	GBM.pembro	L+M-1
CASSMVGDQETQYF	1	6.98227e-05	LB3914T	GBM.pembro	L2-IL7R-CD69-CD40L.T
CASSNARHRGSYEQYF	1	6.98227e-05	LB3914T	GBM.pembro	L+M-2
CASSPARRDREDSRYEQYF	1	6.98227e-05	LB3914T	GBM.pembro	L+M-1
CASSPAVSSYEQYF	1	6.98227e-05	LB4112T	GBM.pembro	L6-Proliferating
CASSPDLLSPLHF	1	6.98227e-05	LB3914T	GBM.pembro	L+M-1
CASSPDRDEQYF	1	6.98227e-05	LB3914T	GBM.pembro	L+M-2
CASSPDRGQVTQYF	1	6.98227e-05	LB4112T	GBM.pembro	L2-IL7R-CD69-CD40L.T
CASSPDRVSYNEQFF	1	6.98227e-05	LB4112T	GBM.pembro	L6-Proliferating
CASSPELAKNIQYF	1	6.98227e-05	LB3914T	GBM.pembro	L3-IL7R-TOX-TCF7.T
CASSPGEDSYEQYF	1	6.98227e-05	LB4112T	GBM.pembro	Dying
CASSPGFGFDEQFF	1	6.98227e-05	LB4025T	GBM.pembro	L+M-1
CASSPGGGQETQYF	1	6.98227e-05	LB4112T	GBM.pembro	L6-Proliferating
CASSPGGLGDTQYF	1	6.98227e-05	LB3914T	GBM.pembro	L+M-2
CASSPGGQSGYTF	1	6.98227e-05	LB3914T	GBM.pembro	L2-IL7R-CD69-CD40L.T
CASSPGLAVVEQYF	1	6.98227e-05	LB4117T	GBM.pembro	L1-GZMK.CD8A.T
CASSPGNLAKNIQYF	1	6.98227e-05	LB3944T	GBM.pembro	L+M-2
CASSPGPFTYNEQFF	1	6.98227e-05	LB3914T	GBM.pembro	L+M-1
CASSPGQGASYGYTF	1	6.98227e-05	LB3914T	GBM.pembro	L+M-1
CASSPGQQWNNEQFF	1	6.98227e-05	LB4117T	GBM.pembro	L1-GZMK.CD8A.T
CASSPGRTNTEAFF	1	6.98227e-05	LB4117T	GBM.pembro	L1-GZMK.CD8A.T
CASSPGTGMGNEQFF	1	6.98227e-05	LB3914T	GBM.pembro	L+M-2
CASSPIPSGRTKGTDTQYF	1	6.98227e-05	LB4112T	GBM.pembro	L1-GZMK.CD8A.T
CASSPIRYNEQFF	1	6.98227e-05	LB4112T	GBM.pembro	L1-GZMK.CD8A.T
CASSPIYTGELFF	1	6.98227e-05	LB3914T	GBM.pembro	L3-IL7R-TOX-TCF7.T
CASSPKAGGPSSYEQYF	1	6.98227e-05	LB4112T	GBM.pembro	L1-GZMK.CD8A.T
CASSPKGLAGTGELFF	1	6.98227e-05	LB4112T	GBM.pembro	L6-Proliferating
CASSPLAGSYNEQFF	1	6.98227e-05	LB3914T	GBM.pembro	L1-GZMK.CD8A.T
CASSPLASTDTQYF	1	6.98227e-05	LB4117T	GBM.pembro	L+M-1
CASSPLGGELFF	1	6.98227e-05	LB3914T	GBM.pembro	L1-GZMK.CD8A.T
CASSPLGGENPYEQYF	1	6.98227e-05	LB3914T	GBM.pembro	L4-Treg
CASSPLRDHDGYTF	1	6.98227e-05	LB4112T	GBM.pembro	L+M-1
CASSPMGQGLGTQYF	1	6.98227e-05	LB3914T	GBM.pembro	L4-Treg
CASSPNPQVTSLETQYF	1	6.98227e-05	LB3914T	GBM.pembro	L3-IL7R-TOX-TCF7.T
CASSPPLGYTQYF	1	6.98227e-05	LB4112T	GBM.pembro	L6-Proliferating
CASSPPLRGSGTGELFF	1	6.98227e-05	LB3914T	GBM.pembro	L5-Tc/NK
CASSPPRIGNTGELFF	1	6.98227e-05	LB3914T	GBM.pembro	L+M-1
CASSPPSGGSNQPQHF	1	6.98227e-05	LB3869T	GBM.pembro	L2-IL7R-CD69-CD40L.T
CASSPPTFADTQYF	1	6.98227e-05	LB3914T	GBM.pembro	L3-IL7R-TOX-TCF7.T
CASSPQGAPGETQYF	1	6.98227e-05	LB4112T	GBM.pembro	Dying
CASSPQGERGNTEAFF	1	6.98227e-05	LB3914T	GBM.pembro	L+M-1
CASSPQLDYGYTF	1	6.98227e-05	LB3872T	GBM.pembro	L+M-1
CASSPRGGTDEQYF	1	6.98227e-05	LB4075T	GBM.pembro	L2-IL7R-CD69-CD40L.T
CASSPRQGLRINYGYTF	1	6.98227e-05	LB4075T	GBM.pembro	L3-IL7R-TOX-TCF7.T
CASSPRQGVSYEQYF	1	6.98227e-05	LB4112T	GBM.pembro	L6-Proliferating
CASSPRRVNTEVFF	1	6.98227e-05	LB4117T	GBM.pembro	L+M-2
CASSPRTSLGTGELFF	1	6.98227e-05	LB4117T	GBM.pembro	L+M-2
CASSPSTPLGNTIYF	1	6.98227e-05	LB3914T	GBM.pembro	L3-IL7R-TOX-TCF7.T
CASSPTGQENYGYTF	1	6.98227e-05	LB3914T	GBM.pembro	L+M-1
CASSPTKGRWEQYF	1	6.98227e-05	LB3914T	GBM.pembro	L2-IL7R-CD69-CD40L.T
CASSPTPGAGGPLHF	1	6.98227e-05	LB4117T	GBM.pembro	L1-GZMK.CD8A.T
CASSPTRVGGEAFF	1	6.98227e-05	LB4112T	GBM.pembro	L5-Tc/NK
CASSPTSGRSYNEQFF	1	6.98227e-05	LB3914T	GBM.pembro	L1-GZMK.CD8A.T
CASSPTTGYNEQFF	1	6.98227e-05	LB3914T	GBM.pembro	L2-IL7R-CD69-CD40L.T
CASSPVAGYSYNEQFF	1	6.98227e-05	LB4112T	GBM.pembro	Dying
CASSPVLQGRTGELFF	1	6.98227e-05	LB4117T	GBM.pembro	L1-GZMK.CD8A.T
CASSPWTSGSNEQFF	1	6.98227e-05	LB3864T	GBM.pembro	L+M-1
CASSPYAGENTGELFF	1	6.98227e-05	LB3914T	GBM.pembro	L+M-1
CASSPYPGMNTEAFF	1	6.98227e-05	LB3914T	GBM.pembro	L2-IL7R-CD69-CD40L.T
CASSPYSSGNTIYF	1	6.98227e-05	LB3914T	GBM.pembro	L3-IL7R-TOX-TCF7.T
CASSPYTPDNDGYTF	1	6.98227e-05	LB4117T	GBM.pembro	L2-IL7R-CD69-CD40L.T
CASSQAGHTGELFF	1	6.98227e-05	LB4025T	GBM.pembro	L3-IL7R-TOX-TCF7.T
CASSQAGTGGDTQYF	1	6.98227e-05	LB4117T	GBM.pembro	L4-Treg
CASSQAQGSYNSPLHF	1	6.98227e-05	LB3914T	GBM.pembro	L2-IL7R-CD69-CD40L.T
CASSQDGTLGGANVLTF	1	6.98227e-05	LB3914T	GBM.pembro	L+M-3
CASSQDHFGVAEIQETQYF	1	6.98227e-05	LB4117T	GBM.pembro	L2-IL7R-CD69-CD40L.T
CASSQDIQYNSPLHF	1	6.98227e-05	LB3914T	GBM.pembro	L1-GZMK.CD8A.T
CASSQDLPSQETQYF	1	6.98227e-05	LB3914T	GBM.pembro	L2-IL7R-CD69-CD40L.T
CASSQDPGVKNIQYF	1	6.98227e-05	LB3914T	GBM.pembro	L+M-3
CASSQDTPFLEQYF	1	6.98227e-05	LB3914T	GBM.pembro	Dying
CASSQDVGGAKNIQYF	1	6.98227e-05	LB3914T	GBM.pembro	L+M-1
CASSQDVGSGANVLTF	1	6.98227e-05	LB3914T	GBM.pembro	L1-GZMK.CD8A.T
CASSQDWGANTIYF	1	6.98227e-05	LB4075T	GBM.pembro	L2-IL7R-CD69-CD40L.T
CASSQEAVGGETQYF	1	6.98227e-05	LB3914T	GBM.pembro	L2-IL7R-CD69-CD40L.T
CASSQEDGPYGYTF	1	6.98227e-05	LB3914T	GBM.pembro	L1-GZMK.CD8A.T
CASSQEEAGWSSDTQYF	1	6.98227e-05	LB3914T	GBM.pembro	L5-Tc/NK
CASSQEGDSATNEKLFF	1	6.98227e-05	LB3914T	GBM.pembro	L1-GZMK.CD8A.T
CASSQEGEGESTEAFF	1	6.98227e-05	LB4112T	GBM.pembro	L1-GZMK.CD8A.T
CASSQEILSGTGSSPLHF	1	6.98227e-05	LB3667T	GBM.pembro	L+M-3
CASSQERASGANVLTF	1	6.98227e-05	LB4112T	GBM.pembro	L1-GZMK.CD8A.T
CASSQERQGWNTEAFF	1	6.98227e-05	LB3914T	GBM.pembro	L1-GZMK.CD8A.T
CASSQEVAGGKRNEQFF	1	6.98227e-05	LB3872T	GBM.pembro	L1-GZMK.CD8A.T
CASSQGAGMATGELFF	1	6.98227e-05	LB3914T	GBM.pembro	L7-pDC-Bcells
CASSQGAVEGTEAFF	1	6.98227e-05	LB3914T	GBM.pembro	L1-GZMK.CD8A.T
CASSQGGLAGTDTQYF	1	6.98227e-05	LB4025T	GBM.pembro	L3-IL7R-TOX-TCF7.T
CASSQGRYDTGELFF	1	6.98227e-05	LB3914T	GBM.pembro	L+M-2
CASSQGSDRENTGELFF	1	6.98227e-05	LB3914T	GBM.pembro	L+M-1
CASSQGSRGEQYF	1	6.98227e-05	LB3914T	GBM.pembro	L1-GZMK.CD8A.T
CASSQGSTGSNYGYTF	1	6.98227e-05	LB4025T	GBM.pembro	L4-Treg
CASSQGTGPKNIQYF	1	6.98227e-05	LB3914T	GBM.pembro	L+M-1
CASSQIAVSGANVLTF	1	6.98227e-05	LB4075T	GBM.pembro	L2-IL7R-CD69-CD40L.T
CASSQKEDLGGAHEQYF	1	6.98227e-05	LB3914T	GBM.pembro	L6-Proliferating
CASSQPDRGEETQYF	1	6.98227e-05	LB3914T	GBM.pembro	L6-Proliferating
CASSQPPGTDTQYF	1	6.98227e-05	LB3914T	GBM.pembro	L1-GZMK.CD8A.T
CASSQPPTFEYEQYF	1	6.98227e-05	LB3914T	GBM.pembro	L+M-1
CASSQPRAGGETQYF	1	6.98227e-05	LB3914T	GBM.pembro	L+M-1
CASSQPWTTNEKLFF	1	6.98227e-05	LB3914T	GBM.pembro	L1-GZMK.CD8A.T
CASSQQGFNPLSTDTQYF	1	6.98227e-05	LB4025T	GBM.pembro	L1-GZMK.CD8A.T
CASSQQGGPDTGELFF	1	6.98227e-05	LB4117T	GBM.pembro	L2-IL7R-CD69-CD40L.T
CASSQQGQGTGELFF	1	6.98227e-05	LB3914T	GBM.pembro	L+M-2
CASSQQGTSTDTQYF	1	6.98227e-05	LB3914T	GBM.pembro	L3-IL7R-TOX-TCF7.T
CASSQQSGLYNEQFF	1	6.98227e-05	LB4025T	GBM.pembro	L2-IL7R-CD69-CD40L.T
CASSQSDRGPQYF	1	6.98227e-05	LB3914T	GBM.pembro	Dying
CASSQTASGGPDTQYF	1	6.98227e-05	LB3914T	GBM.pembro	L1-GZMK.CD8A.T
CASSQTLGTWYEQYF	1	6.98227e-05	LB3914T	GBM.pembro	L2-IL7R-CD69-CD40L.T
CASSQTSGGYEQYF	1	6.98227e-05	LB3914T	GBM.pembro	L1-GZMK.CD8A.T
CASSQTSLGRTEAFF	1	6.98227e-05	LB3914T	GBM.pembro	L+M-1
CASSQTTTGGGDYTF	1	6.98227e-05	LB3914T	GBM.pembro	L2-IL7R-CD69-CD40L.T
CASSQYFGSPLHF	1	6.98227e-05	LB3914T	GBM.pembro	L3-IL7R-TOX-TCF7.T
CASSQYNEQFF	1	6.98227e-05	LB3914T	GBM.pembro	Dying
CASSQYQPRRGAILSSGNTIYF	1	6.98227e-05	LB4025T	GBM.pembro	L1-GZMK.CD8A.T
CASSRDATTYEQYF	1	6.98227e-05	LB3914T	GBM.pembro	L5-Tc/NK
CASSRDGLGTYNEQFF	1	6.98227e-05	LB4006T	GBM.pembro	L1-GZMK.CD8A.T
CASSRDLYNNSPLHF	1	6.98227e-05	LB3914T	GBM.pembro	L+M-2
CASSRDRGDNYGYTF	1	6.98227e-05	LB4117T	GBM.pembro	L+M-1
CASSRDRGGFNNQPQHF	1	6.98227e-05	LB3914T	GBM.pembro	L6-Proliferating
CASSRGEASANEQFF	1	6.98227e-05	LB4117T	GBM.pembro	L4-Treg
CASSRIVGHEQFF	1	6.98227e-05	LB4112T	GBM.pembro	L2-IL7R-CD69-CD40L.T
CASSRKGSNEKLFF	1	6.98227e-05	LB4117T	GBM.pembro	L2-IL7R-CD69-CD40L.T
CASSRMNTEAFF	1	6.98227e-05	LB3667T	GBM.pembro	L3-IL7R-TOX-TCF7.T
CASSRPGELFF	1	6.98227e-05	LB4117T	GBM.pembro	L5-Tc/NK
CASSRPGTSIKTKNIQYF	1	6.98227e-05	LB3914T	GBM.pembro	L+M-1
CASSRSDNEQFF	1	6.98227e-05	LB3914T	GBM.pembro	Dying
CASSRTGGLNEQFF	1	6.98227e-05	LB4025T	GBM.pembro	L2-IL7R-CD69-CD40L.T
CASSRTITADYGYTF	1	6.98227e-05	LB4075T	GBM.pembro	L3-IL7R-TOX-TCF7.T
CASSRTTGTGRKNGYTF	1	6.98227e-05	LB4112T	GBM.pembro	L1-GZMK.CD8A.T
CASSSDLNTEAFF	1	6.98227e-05	LB4112T	GBM.pembro	L+M-3
CASSSDRGEQYF	1	6.98227e-05	LB4112T	GBM.pembro	L+M-1
CASSSEPGEAKSYTF	1	6.98227e-05	LB3914T	GBM.pembro	L2-IL7R-CD69-CD40L.T
CASSSGPAREQFF	1	6.98227e-05	LB4025T	GBM.pembro	L1-GZMK.CD8A.T
CASSSGQGTADTQYF	1	6.98227e-05	LB3914T	GBM.pembro	L+M-2
CASSSGQGTTDTQYF	1	6.98227e-05	LB3914T	GBM.pembro	L+M-1
CASSSGTGPTEAFF	1	6.98227e-05	LB4112T	GBM.pembro	L+M-2
CASSSISGGASEQFF	1	6.98227e-05	LB4117T	GBM.pembro	L2-IL7R-CD69-CD40L.T
CASSSKDRTSTDTQYF	1	6.98227e-05	LB3667T	GBM.pembro	L2-IL7R-CD69-CD40L.T
CASSSKQGYEQYF	1	6.98227e-05	LB4112T	GBM.pembro	L1-GZMK.CD8A.T
CASSSLDPRETQYF	1	6.98227e-05	LB3914T	GBM.pembro	L+M-1
CASSSMDRGDNQPQHF	1	6.98227e-05	LB3914T	GBM.pembro	L+M-1
CASSSPDRDEQYF	1	6.98227e-05	LB3914T	GBM.pembro	L2-IL7R-CD69-CD40L.T
CASSSPGSNYGYTF	1	6.98227e-05	LB4112T	GBM.pembro	L4-Treg
CASSSPLVTGELFF	1	6.98227e-05	LB4112T	GBM.pembro	L+M-2
CASSSQTGTGHYEQYF	1	6.98227e-05	LB4025T	GBM.pembro	L1-GZMK.CD8A.T
CASSSRDFKETQYF	1	6.98227e-05	LB4112T	GBM.pembro	L6-Proliferating
CASSSRTGGYNEQFF	1	6.98227e-05	LB3872T	GBM.pembro	L+M-1
CASSSSAGGPSYEQYF	1	6.98227e-05	LB4075T	GBM.pembro	L3-IL7R-TOX-TCF7.T
CASSSSEGGTDTQYF	1	6.98227e-05	LB3914T	GBM.pembro	L+M-2
CASSSSVETEKLFF	1	6.98227e-05	LB4025T	GBM.pembro	L6-Proliferating
CASSSTGTGNEKLFF	1	6.98227e-05	LB4112T	GBM.pembro	L6-Proliferating
CASSSTSGAPREQFF	1	6.98227e-05	LB3914T	GBM.pembro	L1-GZMK.CD8A.T
CASSSTYTYNEQFF	1	6.98227e-05	LB4025T	GBM.pembro	L1-GZMK.CD8A.T
CASSSVNTEAFF	1	6.98227e-05	LB4112T	GBM.pembro	L4-Treg
CASSSWTEGDEQYF	1	6.98227e-05	LB3914T	GBM.pembro	L6-Proliferating
CASSSYKQGPGLETQYF	1	6.98227e-05	LB4006T	GBM.pembro	L4-Treg
CASSTGGGSYNEQFF	1	6.98227e-05	LB4117T	GBM.pembro	L+M-2
CASSTGVSNTGELFF	1	6.98227e-05	LB4112T	GBM.pembro	L1-GZMK.CD8A.T
CASSTLAGGITGELFF	1	6.98227e-05	LB3944T	GBM.pembro	L+M-1
CASSTLQSANTGELFF	1	6.98227e-05	LB3914T	GBM.pembro	L3-IL7R-TOX-TCF7.T
CASSTPLGTSGPGETQYF	1	6.98227e-05	LB4112T	GBM.pembro	L6-Proliferating
CASSTPLGTSGTGETQYF	1	6.98227e-05	LB4112T	GBM.pembro	L5-Tc/NK
CASSTTSGGSTDTQYF	1	6.98227e-05	LB4112T	GBM.pembro	L1-GZMK.CD8A.T
CASSTTSKGSTDTQYF	1	6.98227e-05	LB4003T	GBM.pembro	L+M-2
CASSTWTSGDQETQYF	1	6.98227e-05	LB4112T	GBM.pembro	L6-Proliferating
CASSVASDGFYEQYF	1	6.98227e-05	LB3914T	GBM.pembro	L1-GZMK.CD8A.T
CASSVAVTGGRAGANVLTF	1	6.98227e-05	LB3914T	GBM.pembro	L+M-1
CASSVFLTAYGYTF	1	6.98227e-05	LB3914T	GBM.pembro	L5-Tc/NK
CASSVGGGAKNIQYF	1	6.98227e-05	LB3914T	GBM.pembro	L1-GZMK.CD8A.T
CASSVGGVNTEAFF	1	6.98227e-05	LB4112T	GBM.pembro	L2-IL7R-CD69-CD40L.T
CASSVGLAGFSGELFF	1	6.98227e-05	LB3914T	GBM.pembro	L+M-1
CASSVGRGGTEAFF	1	6.98227e-05	LB3667T	GBM.pembro	L+M-1
CASSVGSGGPSEQFF	1	6.98227e-05	LB4075T	GBM.pembro	L+M-2
CASSVGTGYGLYTF	1	6.98227e-05	LB4025T	GBM.pembro	L6-Proliferating
CASSVGYNEQFF	1	6.98227e-05	LB3914T	GBM.pembro	L+M-1
CASSVKQRRGNTIYF	1	6.98227e-05	LB4075T	GBM.pembro	L3-IL7R-TOX-TCF7.T
CASSVPGLAYEQYF	1	6.98227e-05	LB3944T	GBM.pembro	L+M-1
CASSVTGGDEKLFF	1	6.98227e-05	LB4025T	GBM.pembro	L6-Proliferating
CASSVTGNSYEQYF	1	6.98227e-05	LB3914T	GBM.pembro	L2-IL7R-CD69-CD40L.T
CASSVVAVPYNEQFF	1	6.98227e-05	LB4112T	GBM.pembro	L6-Proliferating
CASSWGAGTGREQYF	1	6.98227e-05	LB4112T	GBM.pembro	L6-Proliferating
CASSWRDYGYTF	1	6.98227e-05	LB4112T	GBM.pembro	L+M-1
CASSWRGVDEQYF	1	6.98227e-05	LB3914T	GBM.pembro	L1-GZMK.CD8A.T
CASSYASGMGEQYF	1	6.98227e-05	LB4112T	GBM.pembro	L+M-1
CASSYGEGNDLYF	1	6.98227e-05	LB3914T	GBM.pembro	L6-Proliferating
CASSYGEGTGRGGEQYF	1	6.98227e-05	LB4112T	GBM.pembro	L4-Treg
CASSYGQASYEQYF	1	6.98227e-05	LB4112T	GBM.pembro	L+M-1
CASSYGQGTQETQYF	1	6.98227e-05	LB4025T	GBM.pembro	L3-IL7R-TOX-TCF7.T
CASSYGSNYGYTF	1	6.98227e-05	LB4112T	GBM.pembro	L2-IL7R-CD69-CD40L.T
CASSYGTWLEQYF	1	6.98227e-05	LB3914T	GBM.pembro	L+M-1
CASSYPGPKDNSPLHF	1	6.98227e-05	LB3914T	GBM.pembro	L4-Treg
CASSYRGYTEAFF	1	6.98227e-05	LB4117T	GBM.pembro	L2-IL7R-CD69-CD40L.T
CASSYSGGGTDTQYF	1	6.98227e-05	LB3872T	GBM.pembro	L+M-1
CASSYSGGVDGYTF	1	6.98227e-05	LB4025T	GBM.pembro	L4-Treg
CASSYSGVEQFF	1	6.98227e-05	LB3914T	GBM.pembro	L1-GZMK.CD8A.T
CASSYSLQGTINPEAFF	1	6.98227e-05	LB3914T	GBM.pembro	L4-Treg
CASSYSRDRGLSGYTF	1	6.98227e-05	LB3914T	GBM.pembro	L+M-1
CASSYSRDTEAFF	1	6.98227e-05	LB4112T	GBM.pembro	L4-Treg
CASSYSRGGYTF	1	6.98227e-05	LB4112T	GBM.pembro	L3-IL7R-TOX-TCF7.T
CASSYSRQGFSYNEQFF	1	6.98227e-05	LB4112T	GBM.pembro	L7-pDC-Bcells
CASSYSYEQYF	1	6.98227e-05	LB3914T	GBM.pembro	L2-IL7R-CD69-CD40L.T
CASSYTVFNEQFF	1	6.98227e-05	LB3914T	GBM.pembro	L+M-1
CASSYVSQETQYF	1	6.98227e-05	LB4075T	GBM.pembro	L1-GZMK.CD8A.T
CASTEGTSYNEQFF	1	6.98227e-05	LB3914T	GBM.pembro	L2-IL7R-CD69-CD40L.T
CASTGGLSYGYTF	1	6.98227e-05	LB4112T	GBM.pembro	L4-Treg
CASTPGFTTEAFF	1	6.98227e-05	LB4075T	GBM.pembro	L1-GZMK.CD8A.T
CASTPGYNEQFF	1	6.98227e-05	LB3869T	GBM.pembro	L4-Treg
CASTPLGGITDTQYF	1	6.98227e-05	LB4112T	GBM.pembro	L2-IL7R-CD69-CD40L.T
CASTPSPGTNQPQHF	1	6.98227e-05	LB4117T	GBM.pembro	L2-IL7R-CD69-CD40L.T
CASTQGSYEQYF	1	6.98227e-05	LB4112T	GBM.pembro	L6-Proliferating
CASTSRTGEAFF	1	6.98227e-05	LB4075T	GBM.pembro	L3-IL7R-TOX-TCF7.T
CASTVDNYSNQPQHF	1	6.98227e-05	LB4117T	GBM.pembro	L+M-1
CASTVRTWSSYNEQFF	1	6.98227e-05	LB4112T	GBM.pembro	L+M-1
CASWRAGDYGYTF	1	6.98227e-05	LB4025T	GBM.pembro	L+M-2
CATAPTYGLRPGGLGNTIYF	1	6.98227e-05	LB3914T	GBM.pembro	Dying
CATGVGGREETQYF	1	6.98227e-05	LB3914T	GBM.pembro	L2-IL7R-CD69-CD40L.T
CATPGLDINNEQFF	1	6.98227e-05	LB4025T	GBM.pembro	L1-GZMK.CD8A.T
CATRAVGGYEQYF	1	6.98227e-05	LB3914T	GBM.pembro	L+M-1
CATSASTGGYSNQPQHF	1	6.98227e-05	LB4006T	GBM.pembro	L3-IL7R-TOX-TCF7.T
CATSDFTGELFF	1	6.98227e-05	LB4112T	GBM.pembro	L2-IL7R-CD69-CD40L.T
CATSDIQGAQTDTQYF	1	6.98227e-05	LB3914T	GBM.pembro	L2-IL7R-CD69-CD40L.T
CATSDLQGSKGYTF	1	6.98227e-05	LB3914T	GBM.pembro	L4-Treg
CATSDLSSRDSQETQYF	1	6.98227e-05	LB3914T	GBM.pembro	L+M-2
CATSDLTGEAGNEQFF	1	6.98227e-05	LB3914T	GBM.pembro	L+M-3
CATSDPRQTTNEKLFF	1	6.98227e-05	LB3914T	GBM.pembro	L1-GZMK.CD8A.T
CATSDRNWDPSNTGELFF	1	6.98227e-05	LB4112T	GBM.pembro	L6-Proliferating
CATSDSSAAYNEQFF	1	6.98227e-05	LB4112T	GBM.pembro	L+M-1
CATSGSGERGETQYF	1	6.98227e-05	LB4112T	GBM.pembro	L2-IL7R-CD69-CD40L.T
CATSGSHQGVNEQFF	1	6.98227e-05	LB3667T	GBM.pembro	L2-IL7R-CD69-CD40L.T
CATSNPASTDTQYF	1	6.98227e-05	LB3914T	GBM.pembro	L1-GZMK.CD8A.T
CATSPGEGPRETQYF	1	6.98227e-05	LB4112T	GBM.pembro	L+M-1
CATSQGQGGTEAFF	1	6.98227e-05	LB3914T	GBM.pembro	L2-IL7R-CD69-CD40L.T
CATSRDAGGFQSDTQYF	1	6.98227e-05	LB4112T	GBM.pembro	L+M-1
CATSRDGFNSPLHF	1	6.98227e-05	LB3914T	GBM.pembro	L+M-2
CATSRERGTSEKLFF	1	6.98227e-05	LB3914T	GBM.pembro	L1-GZMK.CD8A.T
CATSRGDRETDTQYF	1	6.98227e-05	LB3914T	GBM.pembro	L+M-2
CATSRGTGGAGNQPQHF	1	6.98227e-05	LB3914T	GBM.pembro	L4-Treg
CATSRVGEGGWETQYF	1	6.98227e-05	LB3914T	GBM.pembro	L5-Tc/NK
CATSRVPFQETQYF	1	6.98227e-05	LB4025T	GBM.pembro	L3-IL7R-TOX-TCF7.T
CATSRVPGGGQYF	1	6.98227e-05	LB3914T	GBM.pembro	L1-GZMK.CD8A.T
CATSTENSPLHF	1	6.98227e-05	LB4117T	GBM.pembro	L2-IL7R-CD69-CD40L.T
CATSTGANEQFF	1	6.98227e-05	LB3914T	GBM.pembro	L+M-1
CATSTGVDYGYTF	1	6.98227e-05	LB3914T	GBM.pembro	L1-GZMK.CD8A.T
CATVAASGPQETQYF	1	6.98227e-05	LB3914T	GBM.pembro	L3-IL7R-TOX-TCF7.T
CAWRGSMNTEAFF	1	6.98227e-05	LB4112T	GBM.pembro	L+M-1
CAWSAGLNEKLFF	1	6.98227e-05	LB4112T	GBM.pembro	L1-GZMK.CD8A.T
CAWSVLEGYAQYF	1	6.98227e-05	LB4112T	GBM.pembro	L+M-2
CAWSWAGNTEAFF	1	6.98227e-05	LB4112T	GBM.pembro	L4-Treg
CDICPGQSLMITEAFF	1	6.98227e-05	LB3914T	GBM.pembro	L1-GZMK.CD8A.T
CRVMGDRDTEAFF	1	6.98227e-05	LB3914T	GBM.pembro	L3-IL7R-TOX-TCF7.T
CSAAEKRTGDTQPQHF	1	6.98227e-05	LB3914T	GBM.pembro	L7-pDC-Bcells
CSAAPPSGGNTGELFF	1	6.98227e-05	LB3914T	GBM.pembro	L6-Proliferating
CSAEHRTLQETLYF	1	6.98227e-05	LB4025T	GBM.pembro	L3-IL7R-TOX-TCF7.T
CSAERGADQETQYF	1	6.98227e-05	LB4117T	GBM.pembro	L1-GZMK.CD8A.T
CSAGRADYGETQYF	1	6.98227e-05	LB4112T	GBM.pembro	L4-Treg
CSAISGGAGYEQYF	1	6.98227e-05	LB3914T	GBM.pembro	L2-IL7R-CD69-CD40L.T
CSAKPSGSTEQFF	1	6.98227e-05	LB4112T	GBM.pembro	L5-Tc/NK
CSAKTRVGSNQPQHF	1	6.98227e-05	LB3914T	GBM.pembro	L+M-3
CSALDRYFGEQFF	1	6.98227e-05	LB4075T	GBM.pembro	L3-IL7R-TOX-TCF7.T
CSALGLAGGRF	1	6.98227e-05	LB4112T	GBM.pembro	L1-GZMK.CD8A.T
CSAPEGDEQFF	1	6.98227e-05	LB3914T	GBM.pembro	L1-GZMK.CD8A.T
CSAPPEFDNQPQHF	1	6.98227e-05	LB3914T	GBM.pembro	L1-GZMK.CD8A.T
CSAPSGTTETQYF	1	6.98227e-05	LB3914T	GBM.pembro	L+M-1
CSAPTGLAFF	1	6.98227e-05	LB3872T	GBM.pembro	L+M-1
CSARDGRQDFYEQYF	1	6.98227e-05	LB4112T	GBM.pembro	L+M-2
CSARDLTDSSYEQYF	1	6.98227e-05	LB4117T	GBM.pembro	L2-IL7R-CD69-CD40L.T
CSARDPETGSSPLHF	1	6.98227e-05	LB3914T	GBM.pembro	L1-GZMK.CD8A.T
CSARDPSGTDTYEQYF	1	6.98227e-05	LB3914T	GBM.pembro	L+M-1
CSARDQGRVGDTQYF	1	6.98227e-05	LB4117T	GBM.pembro	L+M-1
CSARDRAVLYQPQHF	1	6.98227e-05	LB3914T	GBM.pembro	L1-GZMK.CD8A.T
CSARDSRPLYAGETQYF	1	6.98227e-05	LB3914T	GBM.pembro	L+M-2
CSARDWGAGTDSGANVLTF	1	6.98227e-05	LB3914T	GBM.pembro	L1-GZMK.CD8A.T
CSARDWTGDQPQHF	1	6.98227e-05	LB3914T	GBM.pembro	L+M-1
CSAREGVAGDARYEQYF	1	6.98227e-05	LB4025T	GBM.pembro	L2-IL7R-CD69-CD40L.T
CSAREHLYNTIYF	1	6.98227e-05	LB3914T	GBM.pembro	L1-GZMK.CD8A.T
CSARFRDTEAFF	1	6.98227e-05	LB3914T	GBM.pembro	L+M-2
CSARGRVDGAGFTDTQYF	1	6.98227e-05	LB4112T	GBM.pembro	L1-GZMK.CD8A.T
CSARGVGSPSYEQYF	1	6.98227e-05	LB3914T	GBM.pembro	L2-IL7R-CD69-CD40L.T
CSARGVTRGNTEAFF	1	6.98227e-05	LB3914T	GBM.pembro	L+M-1
CSARHAGGAVNTEAFF	1	6.98227e-05	LB4025T	GBM.pembro	L1-GZMK.CD8A.T
CSARIPGGSYNEQFF	1	6.98227e-05	LB4117T	GBM.pembro	L1-GZMK.CD8A.T
CSARLAGSTDTQYF	1	6.98227e-05	LB4117T	GBM.pembro	L2-IL7R-CD69-CD40L.T
CSARLAGVKLSSYNEQFF	1	6.98227e-05	LB3914T	GBM.pembro	L5-Tc/NK
CSARLQGERAQYF	1	6.98227e-05	LB3914T	GBM.pembro	L+M-1
CSARRDTLLNTGELFF	1	6.98227e-05	LB4112T	GBM.pembro	L1-GZMK.CD8A.T
CSARSGNQINYGYTF	1	6.98227e-05	LB4112T	GBM.pembro	L+M-2
CSARVAGASSTDTQYF	1	6.98227e-05	LB3914T	GBM.pembro	L+M-1
CSASGRGSSYEQYF	1	6.98227e-05	LB3914T	GBM.pembro	L1-GZMK.CD8A.T
CSASPDFPQFF	1	6.98227e-05	LB4112T	GBM.pembro	L+M-2
CSASPGDRGSYEQYF	1	6.98227e-05	LB3914T	GBM.pembro	L+M-1
CSASRPGTGITGELFF	1	6.98227e-05	LB3914T	GBM.pembro	L1-GZMK.CD8A.T
CSASTLLAGGRIYEQYF	1	6.98227e-05	LB4112T	GBM.pembro	L1-GZMK.CD8A.T
CSATAVSGGVADTQYF	1	6.98227e-05	LB3914T	GBM.pembro	L+M-2
CSATRGPTDTQYF	1	6.98227e-05	LB3914T	GBM.pembro	L+M-2
CSAVPSGSTGELFF	1	6.98227e-05	LB4112T	GBM.pembro	L2-IL7R-CD69-CD40L.T
CSDDSRFSGYTF	1	6.98227e-05	LB3914T	GBM.pembro	L4-Treg
CSFMNTDTQYF	1	6.98227e-05	LB3914T	GBM.pembro	L+M-1
CSGGEKGGLRNEQFF	1	6.98227e-05	LB4025T	GBM.pembro	L1-GZMK.CD8A.T
CSITGRLGTDTQYF	1	6.98227e-05	LB3914T	GBM.pembro	Dying
CSSPHGVYNEQFF	1	6.98227e-05	LB4075T	GBM.pembro	L6-Proliferating
CSVEEGDRYYGYTF	1	6.98227e-05	LB3914T	GBM.pembro	L1-GZMK.CD8A.T
CSVEPTSGGGVDTQYF	1	6.98227e-05	LB3914T	GBM.pembro	L+M-2
CSVFGVNTEAFF	1	6.98227e-05	LB3914T	GBM.pembro	L+M-2
CSVGGPRQGEKLFF	1	6.98227e-05	LB3914T	GBM.pembro	L2-IL7R-CD69-CD40L.T
CSVGGTSGGAINNEQFF	1	6.98227e-05	LB3914T	GBM.pembro	L1-GZMK.CD8A.T
CSVGQGNEQFF	1	6.98227e-05	LB3914T	GBM.pembro	L1-GZMK.CD8A.T
CSVGTGGTNEKLFF	1	6.98227e-05	LB3914T	GBM.pembro	L1-GZMK.CD8A.T
CSVLQSYEQYF	1	6.98227e-05	LB3914T	GBM.pembro	L6-Proliferating
CSVRQGAGYTF	1	6.98227e-05	LB4117T	GBM.pembro	L1-GZMK.CD8A.T
CSVTDWDTEAFF	1	6.98227e-05	LB3914T	GBM.pembro	L4-Treg
CSVTSGSSAQYF	1	6.98227e-05	LB4003T	GBM.pembro	L4-Treg
CSVWLGGGGQETQYF	1	6.98227e-05	LB3914T	GBM.pembro	L+M-1
CVSSPGLEYEQYF	1	6.98227e-05	LB3914T	GBM.pembro	L+M-1
RASSLGLAGGPGFVDTQYF	1	6.98227e-05	LB3914T	GBM.pembro	L+M-1
WKRGGSVTEAFF	1	6.98227e-05	LB3914T	GBM.pembro	L+M-1

## Sheet: PBMC
clono2	cellNum	ClonoFreq	ID	condition	celltype
CASSLRGQGDGYTF	1	1.77167e-05	Donor-6-P	HealthyDonor	P1_CD8+GZMB+GZMH+
CASSPLTSTSSYNEQFF	1	1.77167e-05	Donor-6-P	HealthyDonor	P1_CD8+GZMB+GZMH+
CALGEGSSGSARQLTF	1	1.77167e-05	Donor-7-A02P	HealthyDonor	P2_CD8+GZMK+
CARSVGGLGGAGQPQHF	1	1.77167e-05	Donor-7-A02P	HealthyDonor	L/M doublet
CASGGGQAWDGYTF	1	1.77167e-05	Donor-7-A02P	HealthyDonor	P1_CD8+GZMB+GZMH+
CASIGLAGGRGEQFF	1	1.77167e-05	Donor-7-A02P	HealthyDonor	P3_CTL
CASRYNEQFF	1	1.77167e-05	Donor-7-A02P	HealthyDonor	P3_CTL
CASSEAGPQETQYF	1	1.77167e-05	Donor-7-A02P	HealthyDonor	P2_CD8+GZMK+
CASSFGASGDTDTQYF	1	1.77167e-05	Donor-7-A02P	HealthyDonor	P2_CD8+GZMK+
CASSLAAGANEQFF	1	1.77167e-05	Donor-7-A02P	HealthyDonor	P3_CTL
CASSLDSQSSGNTLYV	1	1.77167e-05	Donor-7-A02P	HealthyDonor	P2_CD8+GZMK+
CASSLEGTGYQAFF	1	1.77167e-05	Donor-7-A02P	HealthyDonor	P1_CD8+GZMB+GZMH+
CASSLEPGRDTIYF	1	1.77167e-05	Donor-7-A02P	HealthyDonor	P1_CD8+GZMB+GZMH+
CASSLGGYNEQFF	1	1.77167e-05	Donor-7-A02P	HealthyDonor	P3_CTL
CASSLNRGPQPQHF	1	1.77167e-05	Donor-7-A02P	HealthyDonor	P3_CTL
CASSLPQVPTEAFF	1	1.77167e-05	Donor-7-A02P	HealthyDonor	P3_CTL
CASSLRRWRDRPWGQPQHF	1	1.77167e-05	Donor-7-A02P	HealthyDonor	P3_CTL
CASSLSQGVEAFF	1	1.77167e-05	Donor-7-A02P	HealthyDonor	P3_CTL
CASSLVRKTEQFF	1	1.77167e-05	Donor-7-A02P	HealthyDonor	P5_CD4+LTB+IL7R+
CASSMASSYEQYF	1	1.77167e-05	Donor-7-A02P	HealthyDonor	P3_CTL
CASSPLAGVDADTQYF	1	1.77167e-05	Donor-7-A02P	HealthyDonor	P12_CD4-CD8-XCL1+XCL2+
CASSPQRGTETQYF	1	1.77167e-05	Donor-7-A02P	HealthyDonor	P1_CD8+GZMB+GZMH+
CASSPRDRGNDEQFF	1	1.77167e-05	Donor-7-A02P	HealthyDonor	P3_CTL
CASSPSRLGPGYGYTF	1	1.77167e-05	Donor-7-A02P	HealthyDonor	P2_CD8+GZMK+
CASSQDPTSGTSTDTQYF	1	1.77167e-05	Donor-7-A02P	HealthyDonor	P1_CD8+GZMB+GZMH+
CASSQESEGAWQPQHF	1	1.77167e-05	Donor-7-A02P	HealthyDonor	P5_CD4+LTB+IL7R+
CASSQSPGGTQYF	1	1.77167e-05	Donor-7-A02P	HealthyDonor	P3_CTL
CASSQTSTDTQYF	1	1.77167e-05	Donor-7-A02P	HealthyDonor	P1_CD8+GZMB+GZMH+
CASSQVAVAGGLAKNIQYF	1	1.77167e-05	Donor-7-A02P	HealthyDonor	P3_CTL
CASSSVVLGETQYF	1	1.77167e-05	Donor-7-A02P	HealthyDonor	P5_CD4+LTB+IL7R+
CASSTVTGFQETQYF	1	1.77167e-05	Donor-7-A02P	HealthyDonor	LowRead
CASTAEGARLDYGYTF	1	1.77167e-05	Donor-7-A02P	HealthyDonor	P11_CD4-CD8-LTB+IL7R+
CASTFSGGGTDTQYF	1	1.77167e-05	Donor-7-A02P	HealthyDonor	LowRead
CSALDGSSGNTIYF	1	1.77167e-05	Donor-7-A02P	HealthyDonor	P2_CD8+GZMK+
CSARKYGTGRHEQYF	1	1.77167e-05	Donor-7-A02P	HealthyDonor	P3_CTL
CSGSGQGYGYTF	1	1.77167e-05	Donor-7-A02P	HealthyDonor	P12_CD4-CD8-XCL1+XCL2+
CSTGDPGPTYNEQFF	1	1.77167e-05	Donor-7-A02P	HealthyDonor	P2_CD8+GZMK+
CSVGRRPGYEQYF	1	1.77167e-05	Donor-7-A02P	HealthyDonor	P1_CD8+GZMB+GZMH+
CSVPDKRGGYTF	1	1.77167e-05	Donor-7-A02P	HealthyDonor	P3_CTL
RASSFGGQGDEAFF	1	1.77167e-05	Donor-7-A02P	HealthyDonor	P1_CD8+GZMB+GZMH+
CASSSYPGSGEQYF	87	0.00154135	LB4143P	GBM.rec.PBMC	P1_CD8+GZMB+GZMH+,P2_CD8+GZMK+,P3_CTL,Platelet,P4_Proliferating
CASSFLLPGTGGTEAFF	85	0.00150592	LB4143P	GBM.rec.PBMC	P1_CD8+GZMB+GZMH+,Platelet,B cell,P3_CTL,P2_CD8+GZMK+,P10_CD4+CD8+Naive,L/M doublet
CAISESYGTSGSYNEQFF	51	0.00090355	LB4143P	GBM.rec.PBMC	P13_gdT,P5_CD4+LTB+IL7R+,P1_CD8+GZMB+GZMH+,P11_CD4-CD8-LTB+IL7R+,Platelet,LowRead,P3_CTL,P2_CD8+GZMK+
CASSFYLAGSTDTQYF	45	0.00079725	LB4143P	GBM.rec.PBMC	P1_CD8+GZMB+GZMH+,P3_CTL,P2_CD8+GZMK+,P4_Proliferating,P10_CD4+CD8+Naive,Platelet
CASSGSNSPLHF	39	0.00069095	LB4143P	GBM.rec.PBMC	P1_CD8+GZMB+GZMH+,Platelet
CASQRRDYILGELFF	27	0.00047835	LB4143P	GBM.rec.PBMC	P13_gdT,P1_CD8+GZMB+GZMH+,P2_CD8+GZMK+,Platelet,P3_CTL
CASSRVKYEQYF	24	0.0004252	LB4143P	GBM.rec.PBMC	P1_CD8+GZMB+GZMH+,Platelet
CASSVALSRGVRFKTQYF	23	0.000407484	LB4130P	GBM.rec.PBMC	P2_CD8+GZMK+,P1_CD8+GZMB+GZMH+,P13_gdT
CATSRDAGETQYF	20	0.000354333	LB4143P	GBM.rec.PBMC	Platelet,P1_CD8+GZMB+GZMH+,P2_CD8+GZMK+
CASSLEGFYEQYF	14	0.000248033	LB4143P	GBM.rec.PBMC	P13_gdT,P1_CD8+GZMB+GZMH+,Platelet,P10_CD4+CD8+Naive,P5_CD4+LTB+IL7R+
CSATPAQGTLNEQFF	14	0.000248033	LB4143P	GBM.rec.PBMC	P13_gdT,P1_CD8+GZMB+GZMH+,P11_CD4-CD8-LTB+IL7R+,LowRead,Platelet
CASSQARRGSGNTIYF	13	0.000230317	LB4130P	GBM.rec.PBMC	P1_CD8+GZMB+GZMH+,P2_CD8+GZMK+,P3_CTL
CASSFRDWGHYEQYF	12	0.0002126	LB4143P	GBM.rec.PBMC	P1_CD8+GZMB+GZMH+,P2_CD8+GZMK+
CASSRKSASFAGGSYEQYF	11	0.000194883	LB4143P	GBM.rec.PBMC	P13_gdT,P1_CD8+GZMB+GZMH+,Platelet
CASSQAGESSGANVLTF	11	0.000194883	LB4177P	GBM.rec.PBMC	P11_CD4-CD8-LTB+IL7R+,P2_CD8+GZMK+
CSARDSFTSSYEQYF	9	0.00015945	LB4130P	GBM.rec.PBMC	P1_CD8+GZMB+GZMH+,P2_CD8+GZMK+
CASSAGQGLVETQYF	9	0.00015945	LB4143P	GBM.rec.PBMC	P1_CD8+GZMB+GZMH+,P3_CTL,P2_CD8+GZMK+,P12_CD4-CD8-XCL1+XCL2+,P11_CD4-CD8-LTB+IL7R+
CASSVGGTSGHREQYF	9	0.00015945	LB4143P	GBM.rec.PBMC	P2_CD8+GZMK+,Platelet
CATSRDTGVYEQYF	8	0.000141733	LB4143P	GBM.rec.PBMC	P2_CD8+GZMK+,P1_CD8+GZMB+GZMH+
CASSQVDTIANYGYTF	7	0.000124017	LB4130P	GBM.rec.PBMC	P2_CD8+GZMK+
CASSSEGDTEAFF	6	0.0001063	LB4130P	GBM.rec.PBMC	P1_CD8+GZMB+GZMH+,P2_CD8+GZMK+,L/M doublet
CASSLAGAPSTDTQYF	6	0.0001063	LB4143P	GBM.rec.PBMC	P1_CD8+GZMB+GZMH+,P2_CD8+GZMK+
CASSIDGTGYEQYF	5	8.85834e-05	LB4130P	GBM.rec.PBMC	P1_CD8+GZMB+GZMH+,P11_CD4-CD8-LTB+IL7R+,P2_CD8+GZMK+
CASSPGDRGFVDTQYF	5	8.85834e-05	LB4130P	GBM.rec.PBMC	P2_CD8+GZMK+,P5_CD4+LTB+IL7R+
CASSQSRVGSGNTIYF	5	8.85834e-05	LB4130P	GBM.rec.PBMC	P1_CD8+GZMB+GZMH+,P2_CD8+GZMK+
CASSELGGSGTEAFF	5	8.85834e-05	LB4143P	GBM.rec.PBMC	P2_CD8+GZMK+,P1_CD8+GZMB+GZMH+
CASSMEGDQPQHF	5	8.85834e-05	LB4143P	GBM.rec.PBMC	P1_CD8+GZMB+GZMH+
CASSPTGGIEAFF	5	8.85834e-05	LB4143P	GBM.rec.PBMC	P11_CD4-CD8-LTB+IL7R+,P2_CD8+GZMK+
CASSFTGTDTQYF	4	7.08667e-05	LB4130P	GBM.rec.PBMC	P4_Proliferating,P2_CD8+GZMK+,P1_CD8+GZMB+GZMH+
CASSLAPSGYNEQFF	4	7.08667e-05	LB4130P	GBM.rec.PBMC	P1_CD8+GZMB+GZMH+,P2_CD8+GZMK+
CASSHGKLETQYF	4	7.08667e-05	LB4143P	GBM.rec.PBMC	P2_CD8+GZMK+
CASSLGASPREQYF	4	7.08667e-05	LB4143P	GBM.rec.PBMC	P11_CD4-CD8-LTB+IL7R+,P2_CD8+GZMK+
CASSLVGQGRNEQFF	4	7.08667e-05	LB4143P	GBM.rec.PBMC	P2_CD8+GZMK+
CASSPGGYSTDTQYF	4	7.08667e-05	LB4143P	GBM.rec.PBMC	P2_CD8+GZMK+,P11_CD4-CD8-LTB+IL7R+
CSVRDMNNQPQHF	4	7.08667e-05	LB4143P	GBM.rec.PBMC	P3_CTL,P5_CD4+LTB+IL7R+
CALVTTDSWGKFQF	3	5.315e-05	LB4130P	GBM.rec.PBMC	P2_CD8+GZMK+
CASSDGTLYGYTF	3	5.315e-05	LB4130P	GBM.rec.PBMC	P1_CD8+GZMB+GZMH+
CASSESRGPEAFF	3	5.315e-05	LB4130P	GBM.rec.PBMC	P1_CD8+GZMB+GZMH+
CASSLSVQETQYF	3	5.315e-05	LB4130P	GBM.rec.PBMC	P5_CD4+LTB+IL7R+
CAWRGPGTEAFF	3	5.315e-05	LB4130P	GBM.rec.PBMC	P2_CD8+GZMK+
CAIGDTGPLNTEAFF	3	5.315e-05	LB4143P	GBM.rec.PBMC	P1_CD8+GZMB+GZMH+
CASSLQGANYGYTF	3	5.315e-05	LB4143P	GBM.rec.PBMC	P2_CD8+GZMK+
CASSLSAGAMETQYF	3	5.315e-05	LB4143P	GBM.rec.PBMC	P13_gdT,P1_CD8+GZMB+GZMH+,P2_CD8+GZMK+
CASSYRSGGSRVEQYF	3	5.315e-05	LB4143P	GBM.rec.PBMC	P5_CD4+LTB+IL7R+,P1_CD8+GZMB+GZMH+,P13_gdT
CATRPTEGHEQYF	3	5.315e-05	LB4143P	GBM.rec.PBMC	P2_CD8+GZMK+
CSFEGANTGELFF	3	5.315e-05	LB4143P	GBM.rec.PBMC	P11_CD4-CD8-LTB+IL7R+,P2_CD8+GZMK+
CASSDPGLAGGNEQFF	3	5.315e-05	LB4177P	GBM.rec.PBMC	P2_CD8+GZMK+,P1_CD8+GZMB+GZMH+
CASSGGLRTDTQYF	3	5.315e-05	LB4177P	GBM.rec.PBMC	P11_CD4-CD8-LTB+IL7R+,P8_CD8+Naive,P1_CD8+GZMB+GZMH+
CASSLNQGGEQFF	3	5.315e-05	LB4177P	GBM.rec.PBMC	P1_CD8+GZMB+GZMH+,P3_CTL
CASSPEGQGGSYNEQFF	3	5.315e-05	LB4177P	GBM.rec.PBMC	P1_CD8+GZMB+GZMH+,P2_CD8+GZMK+
CASSQDEGTGGSEQYF	3	5.315e-05	LB4177P	GBM.rec.PBMC	P11_CD4-CD8-LTB+IL7R+
CASRFRGESNQPQHF	2	3.54333e-05	LB4130P	GBM.rec.PBMC	P5_CD4+LTB+IL7R+
CASRTGSSYNEQFF	2	3.54333e-05	LB4130P	GBM.rec.PBMC	P2_CD8+GZMK+,P1_CD8+GZMB+GZMH+
CASSAITGIHSQETQYF	2	3.54333e-05	LB4130P	GBM.rec.PBMC	P5_CD4+LTB+IL7R+
CASSDWGTDGEETQYF	2	3.54333e-05	LB4130P	GBM.rec.PBMC	P1_CD8+GZMB+GZMH+
CASSLGGGYGYTF	2	3.54333e-05	LB4130P	GBM.rec.PBMC	P5_CD4+LTB+IL7R+
CASSLNGENTEAFF	2	3.54333e-05	LB4130P	GBM.rec.PBMC	P2_CD8+GZMK+,P6_Treg
CASSPGTNYGYTF	2	3.54333e-05	LB4130P	GBM.rec.PBMC	P1_CD8+GZMB+GZMH+
CASSPKAPLYGYTF	2	3.54333e-05	LB4130P	GBM.rec.PBMC	P5_CD4+LTB+IL7R+,P6_Treg
CASSPRGPLETQYF	2	3.54333e-05	LB4130P	GBM.rec.PBMC	P5_CD4+LTB+IL7R+
CASSRLGTPQETQYF	2	3.54333e-05	LB4130P	GBM.rec.PBMC	P1_CD8+GZMB+GZMH+,P2_CD8+GZMK+
CATSREWGGAGEQYF	2	3.54333e-05	LB4130P	GBM.rec.PBMC	P1_CD8+GZMB+GZMH+
CSVDYGYEQYF	2	3.54333e-05	LB4130P	GBM.rec.PBMC	P5_CD4+LTB+IL7R+
CAIPTSGASDLNTGELFF	2	3.54333e-05	LB4143P	GBM.rec.PBMC	P1_CD8+GZMB+GZMH+
CASATGQKNNEQFF	2	3.54333e-05	LB4143P	GBM.rec.PBMC	P1_CD8+GZMB+GZMH+
CASGNGDSYEQYF	2	3.54333e-05	LB4143P	GBM.rec.PBMC	P2_CD8+GZMK+
CASRGLGANTEAFF	2	3.54333e-05	LB4143P	GBM.rec.PBMC	P2_CD8+GZMK+
CASRGYTTYEQYF	2	3.54333e-05	LB4143P	GBM.rec.PBMC	P11_CD4-CD8-LTB+IL7R+
CASSEEASTAEQYF	2	3.54333e-05	LB4143P	GBM.rec.PBMC	P11_CD4-CD8-LTB+IL7R+
CASSKQGAAGYTF	2	3.54333e-05	LB4143P	GBM.rec.PBMC	Platelet,P1_CD8+GZMB+GZMH+
CASSLGNSNQPQHF	2	3.54333e-05	LB4143P	GBM.rec.PBMC	P1_CD8+GZMB+GZMH+,P2_CD8+GZMK+
CASSLVLTENTGELFF	2	3.54333e-05	LB4143P	GBM.rec.PBMC	P2_CD8+GZMK+,P1_CD8+GZMB+GZMH+
CASSPSTGNYGYTF	2	3.54333e-05	LB4143P	GBM.rec.PBMC	P5_CD4+LTB+IL7R+,P11_CD4-CD8-LTB+IL7R+
CASSQTRGQGLREQYF	2	3.54333e-05	LB4143P	GBM.rec.PBMC	P1_CD8+GZMB+GZMH+,P13_gdT
CASSVRDTGELFF	2	3.54333e-05	LB4143P	GBM.rec.PBMC	P11_CD4-CD8-LTB+IL7R+
CASSWGPHTEAFF	2	3.54333e-05	LB4143P	GBM.rec.PBMC	P2_CD8+GZMK+
CASTRGGGGTDTQYF	2	3.54333e-05	LB4143P	GBM.rec.PBMC	P5_CD4+LTB+IL7R+
CATSPMGGETQYF	2	3.54333e-05	LB4143P	GBM.rec.PBMC	P2_CD8+GZMK+
CATSRDLGGDSYEQYF	2	3.54333e-05	LB4143P	GBM.rec.PBMC	P2_CD8+GZMK+
CSARDIRAPAYEQYF	2	3.54333e-05	LB4143P	GBM.rec.PBMC	P1_CD8+GZMB+GZMH+
CSARGLAGGPTDEQFF	2	3.54333e-05	LB4143P	GBM.rec.PBMC	P11_CD4-CD8-LTB+IL7R+
CSATPGQEVETQYF	2	3.54333e-05	LB4143P	GBM.rec.PBMC	P2_CD8+GZMK+,P8_CD8+Naive
CASSDLDPVAKNIQYF	2	3.54333e-05	LB4177P	GBM.rec.PBMC	P5_CD4+LTB+IL7R+,P6_Treg
CASSDSRSPSDTQYF	2	3.54333e-05	LB4177P	GBM.rec.PBMC	P11_CD4-CD8-LTB+IL7R+
CASSENSGDTGELFF	2	3.54333e-05	LB4177P	GBM.rec.PBMC	P11_CD4-CD8-LTB+IL7R+
CASSEPGTVSYEQYF	2	3.54333e-05	LB4177P	GBM.rec.PBMC	P4_Proliferating
CASSLDRQETQYF	2	3.54333e-05	LB4177P	GBM.rec.PBMC	P1_CD8+GZMB+GZMH+
CASSLDTDTQYF	2	3.54333e-05	LB4177P	GBM.rec.PBMC	Platelet,P1_CD8+GZMB+GZMH+
CASSLIANEQFF	2	3.54333e-05	LB4177P	GBM.rec.PBMC	P2_CD8+GZMK+,P1_CD8+GZMB+GZMH+
CASSPGNQPQHF	2	3.54333e-05	LB4177P	GBM.rec.PBMC	P5_CD4+LTB+IL7R+,P9_CD4-CD8-_GZMK+
CASSPKPGSNTEAFF	2	3.54333e-05	LB4177P	GBM.rec.PBMC	P5_CD4+LTB+IL7R+,L/M doublet
CASSPRSESNSPLHF	2	3.54333e-05	LB4177P	GBM.rec.PBMC	P1_CD8+GZMB+GZMH+
CASSQGSGQGDRRYF	2	3.54333e-05	LB4177P	GBM.rec.PBMC	P5_CD4+LTB+IL7R+
CASSRLGAGEETQYF	2	3.54333e-05	LB4177P	GBM.rec.PBMC	P5_CD4+LTB+IL7R+
CASSSGRGQGQETQYF	2	3.54333e-05	LB4177P	GBM.rec.PBMC	P5_CD4+LTB+IL7R+
CASSTRALRGSSYNEQFF	2	3.54333e-05	LB4177P	GBM.rec.PBMC	P1_CD8+GZMB+GZMH+
CASSVRRDSSMEAFF	2	3.54333e-05	LB4177P	GBM.rec.PBMC	P5_CD4+LTB+IL7R+
CSARHGQGVGEQYF	2	3.54333e-05	LB4177P	GBM.rec.PBMC	P2_CD8+GZMK+
CSARSINGQESSGYTF	2	3.54333e-05	LB4177P	GBM.rec.PBMC	P11_CD4-CD8-LTB+IL7R+
CSGWSAGELFF	2	3.54333e-05	LB4177P	GBM.rec.PBMC	P2_CD8+GZMK+
CSVEGTAGGDYGYTF	2	3.54333e-05	LB4177P	GBM.rec.PBMC	P2_CD8+GZMK+
CAISESFTHKTIYGYTF	1	1.77167e-05	LB3871P	GBM.rec.PBMC	P7_CD4+Naive
CAISGDTPGGTQYF	1	1.77167e-05	LB3871P	GBM.rec.PBMC	P5_CD4+LTB+IL7R+
CASGVISYNSPLHF	1	1.77167e-05	LB3871P	GBM.rec.PBMC	P5_CD4+LTB+IL7R+
CASIGTLATEAFF	1	1.77167e-05	LB3871P	GBM.rec.PBMC	P5_CD4+LTB+IL7R+
CASIPGHSGNTIYF	1	1.77167e-05	LB3871P	GBM.rec.PBMC	P5_CD4+LTB+IL7R+
CASKPSGGGKNIQYF	1	1.77167e-05	LB3871P	GBM.rec.PBMC	P5_CD4+LTB+IL7R+
CASNLGAGASNQPQHF	1	1.77167e-05	LB3871P	GBM.rec.PBMC	P5_CD4+LTB+IL7R+
CASRGTSEYNEQFF	1	1.77167e-05	LB3871P	GBM.rec.PBMC	P5_CD4+LTB+IL7R+
CASRPGGQINQPQHF	1	1.77167e-05	LB3871P	GBM.rec.PBMC	P2_CD8+GZMK+
CASRPLVGETQYF	1	1.77167e-05	LB3871P	GBM.rec.PBMC	P1_CD8+GZMB+GZMH+
CASRRTSGGLDTQYF	1	1.77167e-05	LB3871P	GBM.rec.PBMC	P5_CD4+LTB+IL7R+
CASRWAGVGQPQHF	1	1.77167e-05	LB3871P	GBM.rec.PBMC	P2_CD8+GZMK+
CASSADSGSYNEQFF	1	1.77167e-05	LB3871P	GBM.rec.PBMC	P11_CD4-CD8-LTB+IL7R+
CASSATGRGNEQFF	1	1.77167e-05	LB3871P	GBM.rec.PBMC	P2_CD8+GZMK+
CASSATSGGSYSYNEQFF	1	1.77167e-05	LB3871P	GBM.rec.PBMC	P5_CD4+LTB+IL7R+
CASSDKTGGYNEQFF	1	1.77167e-05	LB3871P	GBM.rec.PBMC	P13_gdT
CASSFIGTDQETQYF	1	1.77167e-05	LB3871P	GBM.rec.PBMC	P2_CD8+GZMK+
CASSFYSRREQFF	1	1.77167e-05	LB3871P	GBM.rec.PBMC	P5_CD4+LTB+IL7R+
CASSGGGTRSDTQYF	1	1.77167e-05	LB3871P	GBM.rec.PBMC	P5_CD4+LTB+IL7R+
CASSLADGDEQFF	1	1.77167e-05	LB3871P	GBM.rec.PBMC	P5_CD4+LTB+IL7R+
CASSLALADYEQYF	1	1.77167e-05	LB3871P	GBM.rec.PBMC	P5_CD4+LTB+IL7R+
CASSLASGYTF	1	1.77167e-05	LB3871P	GBM.rec.PBMC	P5_CD4+LTB+IL7R+
CASSLATNQPQHF	1	1.77167e-05	LB3871P	GBM.rec.PBMC	P2_CD8+GZMK+
CASSLDRGVNGYTF	1	1.77167e-05	LB3871P	GBM.rec.PBMC	P5_CD4+LTB+IL7R+
CASSLEAGEDQAFF	1	1.77167e-05	LB3871P	GBM.rec.PBMC	P5_CD4+LTB+IL7R+
CASSLEEGAGGYTF	1	1.77167e-05	LB3871P	GBM.rec.PBMC	P5_CD4+LTB+IL7R+
CASSLEYEAFF	1	1.77167e-05	LB3871P	GBM.rec.PBMC	P5_CD4+LTB+IL7R+
CASSLGLLNTEAFF	1	1.77167e-05	LB3871P	GBM.rec.PBMC	P5_CD4+LTB+IL7R+
CASSLGTGGLTDTQYF	1	1.77167e-05	LB3871P	GBM.rec.PBMC	P6_Treg
CASSLPPGYTF	1	1.77167e-05	LB3871P	GBM.rec.PBMC	P7_CD4+Naive
CASSLQGFFPQPQHF	1	1.77167e-05	LB3871P	GBM.rec.PBMC	P5_CD4+LTB+IL7R+
CASSLSDRVGTFF	1	1.77167e-05	LB3871P	GBM.rec.PBMC	P1_CD8+GZMB+GZMH+
CASSLSWDPTGDTQYF	1	1.77167e-05	LB3871P	GBM.rec.PBMC	P9_CD4-CD8-_GZMK+
CASSLTGAETEAFF	1	1.77167e-05	LB3871P	GBM.rec.PBMC	P5_CD4+LTB+IL7R+
CASSLVVRTGANVLTF	1	1.77167e-05	LB3871P	GBM.rec.PBMC	P5_CD4+LTB+IL7R+
CASSLWEGDTQYF	1	1.77167e-05	LB3871P	GBM.rec.PBMC	P5_CD4+LTB+IL7R+
CASSMGRRDTEAFF	1	1.77167e-05	LB3871P	GBM.rec.PBMC	P5_CD4+LTB+IL7R+
CASSPGGSTHNEQFV	1	1.77167e-05	LB3871P	GBM.rec.PBMC	P2_CD8+GZMK+
CASSPNRDRNEQYF	1	1.77167e-05	LB3871P	GBM.rec.PBMC	P5_CD4+LTB+IL7R+
CASSPPGLAHEQYF	1	1.77167e-05	LB3871P	GBM.rec.PBMC	P5_CD4+LTB+IL7R+
CASSPVPDGYTF	1	1.77167e-05	LB3871P	GBM.rec.PBMC	P5_CD4+LTB+IL7R+
CASSQNTEAFF	1	1.77167e-05	LB3871P	GBM.rec.PBMC	P5_CD4+LTB+IL7R+
CASSQQLYNEQFF	1	1.77167e-05	LB3871P	GBM.rec.PBMC	P5_CD4+LTB+IL7R+
CASSQVVSGSTQYF	1	1.77167e-05	LB3871P	GBM.rec.PBMC	P5_CD4+LTB+IL7R+
CASSSGLAGDPYQETQYF	1	1.77167e-05	LB3871P	GBM.rec.PBMC	P5_CD4+LTB+IL7R+
CASSTGGENYGYTF	1	1.77167e-05	LB3871P	GBM.rec.PBMC	P2_CD8+GZMK+
CASSVSDSGANVLTF	1	1.77167e-05	LB3871P	GBM.rec.PBMC	P5_CD4+LTB+IL7R+
CASSWAPSTEAFF	1	1.77167e-05	LB3871P	GBM.rec.PBMC	P5_CD4+LTB+IL7R+
CASSWGRGSSYNEQFF	1	1.77167e-05	LB3871P	GBM.rec.PBMC	P2_CD8+GZMK+
CASSYDPGKPEAFF	1	1.77167e-05	LB3871P	GBM.rec.PBMC	P2_CD8+GZMK+
CATAGGSPDYGYTF	1	1.77167e-05	LB3871P	GBM.rec.PBMC	P5_CD4+LTB+IL7R+
CATSDLRDKVGDEQFF	1	1.77167e-05	LB3871P	GBM.rec.PBMC	P8_CD8+Naive
CATSRDKGLNQPQHF	1	1.77167e-05	LB3871P	GBM.rec.PBMC	P1_CD8+GZMB+GZMH+
CATSRDRDSGNTIYF	1	1.77167e-05	LB3871P	GBM.rec.PBMC	P9_CD4-CD8-_GZMK+
CDSSLGTGDRKPQHF	1	1.77167e-05	LB3871P	GBM.rec.PBMC	P2_CD8+GZMK+
CSAREVALGYGYTF	1	1.77167e-05	LB3871P	GBM.rec.PBMC	P5_CD4+LTB+IL7R+
CSVHRVADTQYF	1	1.77167e-05	LB3871P	GBM.rec.PBMC	P5_CD4+LTB+IL7R+
CASSYPHEQYF	1	1.77167e-05	LB4015P	GBM.rec.PBMC	P13_gdT
CAFQDYEQYF	1	1.77167e-05	LB4130P	GBM.rec.PBMC	P2_CD8+GZMK+
CAGQPTPGGELFL	1	1.77167e-05	LB4130P	GBM.rec.PBMC	P6_Treg
CAIDGEEIYGYTF	1	1.77167e-05	LB4130P	GBM.rec.PBMC	P5_CD4+LTB+IL7R+
CAIGFLVPVQPQHF	1	1.77167e-05	LB4130P	GBM.rec.PBMC	P1_CD8+GZMB+GZMH+
CAILRGAGETQYF	1	1.77167e-05	LB4130P	GBM.rec.PBMC	P5_CD4+LTB+IL7R+
CAIRGDNTDTQYF	1	1.77167e-05	LB4130P	GBM.rec.PBMC	P1_CD8+GZMB+GZMH+
CAIRTSIGGSTDTQYF	1	1.77167e-05	LB4130P	GBM.rec.PBMC	P8_CD8+Naive
CAISAEAETQYF	1	1.77167e-05	LB4130P	GBM.rec.PBMC	P2_CD8+GZMK+
CAISAYTRTGATYGYTF	1	1.77167e-05	LB4130P	GBM.rec.PBMC	P4_Proliferating
CAISDSTQPQHF	1	1.77167e-05	LB4130P	GBM.rec.PBMC	P5_CD4+LTB+IL7R+
CAISEAPARGDGYTF	1	1.77167e-05	LB4130P	GBM.rec.PBMC	P5_CD4+LTB+IL7R+
CAISEEGGLRYEQYF	1	1.77167e-05	LB4130P	GBM.rec.PBMC	P5_CD4+LTB+IL7R+
CAISEGQGNTIYF	1	1.77167e-05	LB4130P	GBM.rec.PBMC	P5_CD4+LTB+IL7R+
CAISELVQETQYF	1	1.77167e-05	LB4130P	GBM.rec.PBMC	P1_CD8+GZMB+GZMH+
CAISERPDEKLFF	1	1.77167e-05	LB4130P	GBM.rec.PBMC	P6_Treg
CAISESADTDYGYTF	1	1.77167e-05	LB4130P	GBM.rec.PBMC	P5_CD4+LTB+IL7R+
CAISESADTQYF	1	1.77167e-05	LB4130P	GBM.rec.PBMC	P1_CD8+GZMB+GZMH+
CAISESGGLRTYYEQYF	1	1.77167e-05	LB4130P	GBM.rec.PBMC	P5_CD4+LTB+IL7R+
CAISESHRSRNTEAFF	1	1.77167e-05	LB4130P	GBM.rec.PBMC	P5_CD4+LTB+IL7R+
CAISESRTGGGDTQYF	1	1.77167e-05	LB4130P	GBM.rec.PBMC	Platelet
CAISGGLAGEKYYEQYF	1	1.77167e-05	LB4130P	GBM.rec.PBMC	P1_CD8+GZMB+GZMH+
CAISIQGPGGNEQYF	1	1.77167e-05	LB4130P	GBM.rec.PBMC	P8_CD8+Naive
CAISRDRDENIQYF	1	1.77167e-05	LB4130P	GBM.rec.PBMC	P6_Treg
CAISRLAGGYNEQFF	1	1.77167e-05	LB4130P	GBM.rec.PBMC	P6_Treg
CAISVGQNNSPLHF	1	1.77167e-05	LB4130P	GBM.rec.PBMC	P5_CD4+LTB+IL7R+
CAKQGAPQETQYF	1	1.77167e-05	LB4130P	GBM.rec.PBMC	P2_CD8+GZMK+
CALGEIATGNQFYF	1	1.77167e-05	LB4130P	GBM.rec.PBMC	P1_CD8+GZMB+GZMH+
CALSPGEETQYF	1	1.77167e-05	LB4130P	GBM.rec.PBMC	P8_CD8+Naive
CALVTTDSW	1	1.77167e-05	LB4130P	GBM.rec.PBMC	P1_CD8+GZMB+GZMH+
CARSLAGANNEQFF	1	1.77167e-05	LB4130P	GBM.rec.PBMC	P10_CD4+CD8+Naive
CARSVHGHVRSGYGYTF	1	1.77167e-05	LB4130P	GBM.rec.PBMC	P5_CD4+LTB+IL7R+
CASADILDTDTQYF	1	1.77167e-05	LB4130P	GBM.rec.PBMC	P9_CD4-CD8-_GZMK+
CASANRDRVYEQYF	1	1.77167e-05	LB4130P	GBM.rec.PBMC	L/M doublet
CASAQRGGAAEAFF	1	1.77167e-05	LB4130P	GBM.rec.PBMC	P5_CD4+LTB+IL7R+
CASARIGGANTGELFF	1	1.77167e-05	LB4130P	GBM.rec.PBMC	P7_CD4+Naive
CASASSPTDTQYF	1	1.77167e-05	LB4130P	GBM.rec.PBMC	P4_Proliferating
CASCPQGYEAFF	1	1.77167e-05	LB4130P	GBM.rec.PBMC	P5_CD4+LTB+IL7R+
CASEDGIHGRTYEQYF	1	1.77167e-05	LB4130P	GBM.rec.PBMC	P9_CD4-CD8-_GZMK+
CASGAMRGTEAFF	1	1.77167e-05	LB4130P	GBM.rec.PBMC	P6_Treg
CASGEQGTETQYF	1	1.77167e-05	LB4130P	GBM.rec.PBMC	P6_Treg
CASGFSDFQETQYF	1	1.77167e-05	LB4130P	GBM.rec.PBMC	P5_CD4+LTB+IL7R+
CASGGLESDEQFF	1	1.77167e-05	LB4130P	GBM.rec.PBMC	P8_CD8+Naive
CASGGTGGNHEQYF	1	1.77167e-05	LB4130P	GBM.rec.PBMC	P8_CD8+Naive
CASGKANNEQFF	1	1.77167e-05	LB4130P	GBM.rec.PBMC	P8_CD8+Naive
CASGLATGGPTEAFF	1	1.77167e-05	LB4130P	GBM.rec.PBMC	P5_CD4+LTB+IL7R+
CASGLFRGETQYF	1	1.77167e-05	LB4130P	GBM.rec.PBMC	P5_CD4+LTB+IL7R+
CASGLGGTESNYGYTF	1	1.77167e-05	LB4130P	GBM.rec.PBMC	P6_Treg
CASGPGHDNSPLHF	1	1.77167e-05	LB4130P	GBM.rec.PBMC	P2_CD8+GZMK+
CASGQMWGTGNTIYF	1	1.77167e-05	LB4130P	GBM.rec.PBMC	P5_CD4+LTB+IL7R+
CASGQSQETQYF	1	1.77167e-05	LB4130P	GBM.rec.PBMC	P12_CD4-CD8-XCL1+XCL2+
CASGSGLNYGYTF	1	1.77167e-05	LB4130P	GBM.rec.PBMC	P7_CD4+Naive
CASGSSGGDYNEQFF	1	1.77167e-05	LB4130P	GBM.rec.PBMC	P11_CD4-CD8-LTB+IL7R+
CASGWMNTEAFF	1	1.77167e-05	LB4130P	GBM.rec.PBMC	P1_CD8+GZMB+GZMH+
CASIGHTLRQPQHF	1	1.77167e-05	LB4130P	GBM.rec.PBMC	P8_CD8+Naive
CASILVGSSMNTEAFF	1	1.77167e-05	LB4130P	GBM.rec.PBMC	P2_CD8+GZMK+
CASISVGELFF	1	1.77167e-05	LB4130P	GBM.rec.PBMC	P5_CD4+LTB+IL7R+
CASKDGGNTEAFF	1	1.77167e-05	LB4130P	GBM.rec.PBMC	P5_CD4+LTB+IL7R+
CASKRDGDYEQYF	1	1.77167e-05	LB4130P	GBM.rec.PBMC	P6_Treg
CASKSPTGELFF	1	1.77167e-05	LB4130P	GBM.rec.PBMC	P7_CD4+Naive
CASLGFTGELFF	1	1.77167e-05	LB4130P	GBM.rec.PBMC	P8_CD8+Naive
CASLGLVGVMETQYF	1	1.77167e-05	LB4130P	GBM.rec.PBMC	P9_CD4-CD8-_GZMK+
CASMGLLEYEQYF	1	1.77167e-05	LB4130P	GBM.rec.PBMC	P2_CD8+GZMK+
CASNGVLSYEQYF	1	1.77167e-05	LB4130P	GBM.rec.PBMC	P5_CD4+LTB+IL7R+
CASNLHGGYYEQYF	1	1.77167e-05	LB4130P	GBM.rec.PBMC	P6_Treg
CASNRLGYNTEAFF	1	1.77167e-05	LB4130P	GBM.rec.PBMC	P8_CD8+Naive
CASNSPGLYGYTF	1	1.77167e-05	LB4130P	GBM.rec.PBMC	P6_Treg
CASPGQSYNEQFF	1	1.77167e-05	LB4130P	GBM.rec.PBMC	P2_CD8+GZMK+
CASQDRDGGELFF	1	1.77167e-05	LB4130P	GBM.rec.PBMC	P11_CD4-CD8-LTB+IL7R+
CASQPRTSVSTDTQYF	1	1.77167e-05	LB4130P	GBM.rec.PBMC	P10_CD4+CD8+Naive
CASRARGGTDTQYF	1	1.77167e-05	LB4130P	GBM.rec.PBMC	P5_CD4+LTB+IL7R+
CASRDRLGAAKNIQYF	1	1.77167e-05	LB4130P	GBM.rec.PBMC	P5_CD4+LTB+IL7R+
CASRDRLGQGARGNTIYF	1	1.77167e-05	LB4130P	GBM.rec.PBMC	P8_CD8+Naive
CASREKGVPTRLYF	1	1.77167e-05	LB4130P	GBM.rec.PBMC	P9_CD4-CD8-_GZMK+
CASRELGYQETQYF	1	1.77167e-05	LB4130P	GBM.rec.PBMC	P5_CD4+LTB+IL7R+
CASRENTEAFF	1	1.77167e-05	LB4130P	GBM.rec.PBMC	P5_CD4+LTB+IL7R+
CASREWSAEAFF	1	1.77167e-05	LB4130P	GBM.rec.PBMC	P5_CD4+LTB+IL7R+
CASRGSGNEKLFF	1	1.77167e-05	LB4130P	GBM.rec.PBMC	P1_CD8+GZMB+GZMH+
CASRHHTGFSPLHF	1	1.77167e-05	LB4130P	GBM.rec.PBMC	P13_gdT
CASRIRQSGANVLTF	1	1.77167e-05	LB4130P	GBM.rec.PBMC	P8_CD8+Naive
CASRKVVMNTEAFF	1	1.77167e-05	LB4130P	GBM.rec.PBMC	P5_CD4+LTB+IL7R+
CASRLGHDYGYTF	1	1.77167e-05	LB4130P	GBM.rec.PBMC	P8_CD8+Naive
CASRLHGGTKNIQYF	1	1.77167e-05	LB4130P	GBM.rec.PBMC	P4_Proliferating
CASRLMGSSQETQYF	1	1.77167e-05	LB4130P	GBM.rec.PBMC	P7_CD4+Naive
CASRLPTAGADYNEQFF	1	1.77167e-05	LB4130P	GBM.rec.PBMC	P5_CD4+LTB+IL7R+
CASRLQGNSNQPQHF	1	1.77167e-05	LB4130P	GBM.rec.PBMC	P7_CD4+Naive
CASRLRTDEKLFF	1	1.77167e-05	LB4130P	GBM.rec.PBMC	Platelet
CASRPPGGGAYNEQFF	1	1.77167e-05	LB4130P	GBM.rec.PBMC	P5_CD4+LTB+IL7R+
CASRPTSLQETQYF	1	1.77167e-05	LB4130P	GBM.rec.PBMC	P7_CD4+Naive
CASRQGDKYGYTF	1	1.77167e-05	LB4130P	GBM.rec.PBMC	P5_CD4+LTB+IL7R+
CASRQGLLETQYF	1	1.77167e-05	LB4130P	GBM.rec.PBMC	P1_CD8+GZMB+GZMH+
CASRQGSNLDVPLHF	1	1.77167e-05	LB4130P	GBM.rec.PBMC	P5_CD4+LTB+IL7R+
CASRQYDTQYF	1	1.77167e-05	LB4130P	GBM.rec.PBMC	P2_CD8+GZMK+
CASRRGRGARSGELF	1	1.77167e-05	LB4130P	GBM.rec.PBMC	Platelet
CASRRLWGEGTDTQYF	1	1.77167e-05	LB4130P	GBM.rec.PBMC	P9_CD4-CD8-_GZMK+
CASRRTGDTGELFF	1	1.77167e-05	LB4130P	GBM.rec.PBMC	P5_CD4+LTB+IL7R+
CASRSGGLRGTGELFF	1	1.77167e-05	LB4130P	GBM.rec.PBMC	P8_CD8+Naive
CASRSIGLNQETQYF	1	1.77167e-05	LB4130P	GBM.rec.PBMC	P5_CD4+LTB+IL7R+
CASRTATSGAYTGELFF	1	1.77167e-05	LB4130P	GBM.rec.PBMC	P5_CD4+LTB+IL7R+
CASRTEGGSYNEQFF	1	1.77167e-05	LB4130P	GBM.rec.PBMC	P8_CD8+Naive
CASRTGWGLSEIMNTEAFF	1	1.77167e-05	LB4130P	GBM.rec.PBMC	P9_CD4-CD8-_GZMK+
CASRYSGQETQYF	1	1.77167e-05	LB4130P	GBM.rec.PBMC	P5_CD4+LTB+IL7R+
CASSAGLAADTQYF	1	1.77167e-05	LB4130P	GBM.rec.PBMC	P5_CD4+LTB+IL7R+
CASSAGQEETQYF	1	1.77167e-05	LB4130P	GBM.rec.PBMC	P5_CD4+LTB+IL7R+
CASSAGTSGMKQFF	1	1.77167e-05	LB4130P	GBM.rec.PBMC	P5_CD4+LTB+IL7R+
CASSALPGTGYHEQYF	1	1.77167e-05	LB4130P	GBM.rec.PBMC	P6_Treg
CASSAPGPGTGDYRDVRNSYNEQFF	1	1.77167e-05	LB4130P	GBM.rec.PBMC	P5_CD4+LTB+IL7R+
CASSAQMNTEAFF	1	1.77167e-05	LB4130P	GBM.rec.PBMC	P6_Treg
CASSARDRGGVNGYTF	1	1.77167e-05	LB4130P	GBM.rec.PBMC	P5_CD4+LTB+IL7R+
CASSASGQENNQPQHF	1	1.77167e-05	LB4130P	GBM.rec.PBMC	P5_CD4+LTB+IL7R+
CASSASQQQNTEAFF	1	1.77167e-05	LB4130P	GBM.rec.PBMC	P5_CD4+LTB+IL7R+
CASSAWTGGNNSPLHF	1	1.77167e-05	LB4130P	GBM.rec.PBMC	P8_CD8+Naive
CASSDFRDQPTGELFF	1	1.77167e-05	LB4130P	GBM.rec.PBMC	P5_CD4+LTB+IL7R+
CASSDGDQAFF	1	1.77167e-05	LB4130P	GBM.rec.PBMC	L/M doublet
CASSDGGTANYGYTF	1	1.77167e-05	LB4130P	GBM.rec.PBMC	P8_CD8+Naive
CASSDGPAPQGGNADTQYF	1	1.77167e-05	LB4130P	GBM.rec.PBMC	P2_CD8+GZMK+
CASSDNRERGDGYTF	1	1.77167e-05	LB4130P	GBM.rec.PBMC	P8_CD8+Naive
CASSDPGQGYSPLHF	1	1.77167e-05	LB4130P	GBM.rec.PBMC	P1_CD8+GZMB+GZMH+
CASSDQDGGTETQYF	1	1.77167e-05	LB4130P	GBM.rec.PBMC	P2_CD8+GZMK+
CASSDRKSYGYTF	1	1.77167e-05	LB4130P	GBM.rec.PBMC	P5_CD4+LTB+IL7R+
CASSDRVGQPQHF	1	1.77167e-05	LB4130P	GBM.rec.PBMC	P6_Treg
CASSDSGTSGGAMDEQFF	1	1.77167e-05	LB4130P	GBM.rec.PBMC	P11_CD4-CD8-LTB+IL7R+
CASSDSPQGSREQYF	1	1.77167e-05	LB4130P	GBM.rec.PBMC	P5_CD4+LTB+IL7R+
CASSDVGGAHTQYF	1	1.77167e-05	LB4130P	GBM.rec.PBMC	P7_CD4+Naive
CASSEASGGSNEQFF	1	1.77167e-05	LB4130P	GBM.rec.PBMC	P1_CD8+GZMB+GZMH+
CASSEDGGYGYTF	1	1.77167e-05	LB4130P	GBM.rec.PBMC	P5_CD4+LTB+IL7R+
CASSEGAGSPLHF	1	1.77167e-05	LB4130P	GBM.rec.PBMC	P8_CD8+Naive
CASSEGSGANVLTF	1	1.77167e-05	LB4130P	GBM.rec.PBMC	P5_CD4+LTB+IL7R+
CASSEGSRAVYQETQYF	1	1.77167e-05	LB4130P	GBM.rec.PBMC	P5_CD4+LTB+IL7R+
CASSEGWEAGGYTF	1	1.77167e-05	LB4130P	GBM.rec.PBMC	P11_CD4-CD8-LTB+IL7R+
CASSELEGDTQYF	1	1.77167e-05	LB4130P	GBM.rec.PBMC	P8_CD8+Naive
CASSELGGFSTDTQYF	1	1.77167e-05	LB4130P	GBM.rec.PBMC	P5_CD4+LTB+IL7R+
CASSELGMVDTEAFF	1	1.77167e-05	LB4130P	GBM.rec.PBMC	P5_CD4+LTB+IL7R+
CASSELRDTGEKLFF	1	1.77167e-05	LB4130P	GBM.rec.PBMC	P5_CD4+LTB+IL7R+
CASSELSGQQYF	1	1.77167e-05	LB4130P	GBM.rec.PBMC	P8_CD8+Naive
CASSEMEGSPNYGYTF	1	1.77167e-05	LB4130P	GBM.rec.PBMC	P2_CD8+GZMK+
CASSEQGIGTYNEQFF	1	1.77167e-05	LB4130P	GBM.rec.PBMC	P5_CD4+LTB+IL7R+
CASSEQRGVRGETQYF	1	1.77167e-05	LB4130P	GBM.rec.PBMC	L/M doublet
CASSEQTGASTDTQYF	1	1.77167e-05	LB4130P	GBM.rec.PBMC	P5_CD4+LTB+IL7R+
CASSESGSVVQYF	1	1.77167e-05	LB4130P	GBM.rec.PBMC	P7_CD4+Naive
CASSESQGIGGYTF	1	1.77167e-05	LB4130P	GBM.rec.PBMC	P5_CD4+LTB+IL7R+
CASSETGVYNSPLHF	1	1.77167e-05	LB4130P	GBM.rec.PBMC	P5_CD4+LTB+IL7R+
CASSETSGGADTQYF	1	1.77167e-05	LB4130P	GBM.rec.PBMC	P11_CD4-CD8-LTB+IL7R+
CASSEVWDGAQETQYF	1	1.77167e-05	LB4130P	GBM.rec.PBMC	P6_Treg
CASSFAVALQETQYF	1	1.77167e-05	LB4130P	GBM.rec.PBMC	P5_CD4+LTB+IL7R+
CASSFDGGLSYEQYF	1	1.77167e-05	LB4130P	GBM.rec.PBMC	P5_CD4+LTB+IL7R+
CASSFDRGRGHSPLHF	1	1.77167e-05	LB4130P	GBM.rec.PBMC	P6_Treg
CASSFEPPSYEQYF	1	1.77167e-05	LB4130P	GBM.rec.PBMC	LowRead
CASSFFGTSDGNTDTQYF	1	1.77167e-05	LB4130P	GBM.rec.PBMC	P8_CD8+Naive
CASSFGAGPYEQYF	1	1.77167e-05	LB4130P	GBM.rec.PBMC	P9_CD4-CD8-_GZMK+
CASSFGGLGGYNEQFF	1	1.77167e-05	LB4130P	GBM.rec.PBMC	P9_CD4-CD8-_GZMK+
CASSFGGPYEQYF	1	1.77167e-05	LB4130P	GBM.rec.PBMC	P5_CD4+LTB+IL7R+
CASSFGLANYEQFF	1	1.77167e-05	LB4130P	GBM.rec.PBMC	P5_CD4+LTB+IL7R+
CASSFGLLQGAGETQYF	1	1.77167e-05	LB4130P	GBM.rec.PBMC	L/M doublet
CASSFGLSDTEAFF	1	1.77167e-05	LB4130P	GBM.rec.PBMC	P5_CD4+LTB+IL7R+
CASSFIVSEQYF	1	1.77167e-05	LB4130P	GBM.rec.PBMC	P1_CD8+GZMB+GZMH+
CASSFLAGGPEEQFF	1	1.77167e-05	LB4130P	GBM.rec.PBMC	P5_CD4+LTB+IL7R+
CASSFLAGGPIHEQYF	1	1.77167e-05	LB4130P	GBM.rec.PBMC	P2_CD8+GZMK+
CASSFLPSENTGELFF	1	1.77167e-05	LB4130P	GBM.rec.PBMC	P2_CD8+GZMK+
CASSFNTGARRGTEAFF	1	1.77167e-05	LB4130P	GBM.rec.PBMC	P5_CD4+LTB+IL7R+
CASSFPDGSGNTIYF	1	1.77167e-05	LB4130P	GBM.rec.PBMC	Platelet
CASSFPDQETQYF	1	1.77167e-05	LB4130P	GBM.rec.PBMC	P8_CD8+Naive
CASSFPPHTGELFF	1	1.77167e-05	LB4130P	GBM.rec.PBMC	P1_CD8+GZMB+GZMH+
CASSFPQTF	1	1.77167e-05	LB4130P	GBM.rec.PBMC	P8_CD8+Naive
CASSFPTSGRVSSSGEQFF	1	1.77167e-05	LB4130P	GBM.rec.PBMC	P8_CD8+Naive
CASSFRENTIYF	1	1.77167e-05	LB4130P	GBM.rec.PBMC	P5_CD4+LTB+IL7R+
CASSFRGAQEKLFF	1	1.77167e-05	LB4130P	GBM.rec.PBMC	P11_CD4-CD8-LTB+IL7R+
CASSFRTVNTEAFF	1	1.77167e-05	LB4130P	GBM.rec.PBMC	P5_CD4+LTB+IL7R+
CASSFSGGGNTGELFF	1	1.77167e-05	LB4130P	GBM.rec.PBMC	P1_CD8+GZMB+GZMH+
CASSFSGTGTQYF	1	1.77167e-05	LB4130P	GBM.rec.PBMC	P2_CD8+GZMK+
CASSFSHGVYEQYF	1	1.77167e-05	LB4130P	GBM.rec.PBMC	P2_CD8+GZMK+
CASSFSRGTGNQPQHF	1	1.77167e-05	LB4130P	GBM.rec.PBMC	P5_CD4+LTB+IL7R+
CASSFSSENNEQFF	1	1.77167e-05	LB4130P	GBM.rec.PBMC	P5_CD4+LTB+IL7R+
CASSFTSGGQETQYF	1	1.77167e-05	LB4130P	GBM.rec.PBMC	P8_CD8+Naive
CASSFVGGNTGELFF	1	1.77167e-05	LB4130P	GBM.rec.PBMC	P1_CD8+GZMB+GZMH+
CASSFVTSINEQFF	1	1.77167e-05	LB4130P	GBM.rec.PBMC	P5_CD4+LTB+IL7R+
CASSFVTSVTETQYF	1	1.77167e-05	LB4130P	GBM.rec.PBMC	P6_Treg
CASSFWTDYSYNELFF	1	1.77167e-05	LB4130P	GBM.rec.PBMC	P8_CD8+Naive
CASSFYTGELFF	1	1.77167e-05	LB4130P	GBM.rec.PBMC	P1_CD8+GZMB+GZMH+
CASSGDRFDQPQHF	1	1.77167e-05	LB4130P	GBM.rec.PBMC	P5_CD4+LTB+IL7R+
CASSGGGTRGDTQYF	1	1.77167e-05	LB4130P	GBM.rec.PBMC	P6_Treg
CASSGGVGNQPQHF	1	1.77167e-05	LB4130P	GBM.rec.PBMC	P7_CD4+Naive
CASSGGYEQYF	1	1.77167e-05	LB4130P	GBM.rec.PBMC	P5_CD4+LTB+IL7R+
CASSGHGGAQETQYF	1	1.77167e-05	LB4130P	GBM.rec.PBMC	P5_CD4+LTB+IL7R+
CASSGIAGGYEQYF	1	1.77167e-05	LB4130P	GBM.rec.PBMC	P5_CD4+LTB+IL7R+
CASSGIKGGEQFF	1	1.77167e-05	LB4130P	GBM.rec.PBMC	L/M doublet
CASSGPNTEAFF	1	1.77167e-05	LB4130P	GBM.rec.PBMC	P5_CD4+LTB+IL7R+
CASSGSVGLADTQYF	1	1.77167e-05	LB4130P	GBM.rec.PBMC	P6_Treg
CASSGTGNTEAFF	1	1.77167e-05	LB4130P	GBM.rec.PBMC	P8_CD8+Naive
CASSGTQQGGGTEAFF	1	1.77167e-05	LB4130P	GBM.rec.PBMC	P5_CD4+LTB+IL7R+
CASSGWTRGSYNEQFF	1	1.77167e-05	LB4130P	GBM.rec.PBMC	P9_CD4-CD8-_GZMK+
CASSHERLSSYEQYF	1	1.77167e-05	LB4130P	GBM.rec.PBMC	P5_CD4+LTB+IL7R+
CASSHGTGRQPQHF	1	1.77167e-05	LB4130P	GBM.rec.PBMC	P5_CD4+LTB+IL7R+
CASSHPGQGPYEQYF	1	1.77167e-05	LB4130P	GBM.rec.PBMC	P9_CD4-CD8-_GZMK+
CASSHRKTRIKNTEAFF	1	1.77167e-05	LB4130P	GBM.rec.PBMC	P2_CD8+GZMK+
CASSHRQGRDTQYF	1	1.77167e-05	LB4130P	GBM.rec.PBMC	P5_CD4+LTB+IL7R+
CASSHTLGQRHSDPGELFF	1	1.77167e-05	LB4130P	GBM.rec.PBMC	P5_CD4+LTB+IL7R+
CASSHTMDQTRNGYTF	1	1.77167e-05	LB4130P	GBM.rec.PBMC	P5_CD4+LTB+IL7R+
CASSIASNNEQFF	1	1.77167e-05	LB4130P	GBM.rec.PBMC	P11_CD4-CD8-LTB+IL7R+
CASSIGISNQPQHF	1	1.77167e-05	LB4130P	GBM.rec.PBMC	P4_Proliferating
CASSIGLAGGLSTYEQYF	1	1.77167e-05	LB4130P	GBM.rec.PBMC	P2_CD8+GZMK+
CASSIGRNTEAFF	1	1.77167e-05	LB4130P	GBM.rec.PBMC	P2_CD8+GZMK+
CASSIQEYYGYTF	1	1.77167e-05	LB4130P	GBM.rec.PBMC	P5_CD4+LTB+IL7R+
CASSIRQYNEQFF	1	1.77167e-05	LB4130P	GBM.rec.PBMC	P1_CD8+GZMB+GZMH+
CASSITDTQYF	1	1.77167e-05	LB4130P	GBM.rec.PBMC	P5_CD4+LTB+IL7R+
CASSKADRSTEAFF	1	1.77167e-05	LB4130P	GBM.rec.PBMC	P7_CD4+Naive
CASSKDDYGYTF	1	1.77167e-05	LB4130P	GBM.rec.PBMC	P8_CD8+Naive
CASSKKVAGGPGNEQFF	1	1.77167e-05	LB4130P	GBM.rec.PBMC	P5_CD4+LTB+IL7R+
CASSKLAGGPGTDTQYF	1	1.77167e-05	LB4130P	GBM.rec.PBMC	P2_CD8+GZMK+
CASSKPFAGSDTEAFF	1	1.77167e-05	LB4130P	GBM.rec.PBMC	P5_CD4+LTB+IL7R+
CASSKRTGSNTEAFF	1	1.77167e-05	LB4130P	GBM.rec.PBMC	P5_CD4+LTB+IL7R+
CASSLAASLGTGELFF	1	1.77167e-05	LB4130P	GBM.rec.PBMC	P5_CD4+LTB+IL7R+
CASSLADRGTQYF	1	1.77167e-05	LB4130P	GBM.rec.PBMC	P7_CD4+Naive
CASSLAFGTGGRLEQFF	1	1.77167e-05	LB4130P	GBM.rec.PBMC	P5_CD4+LTB+IL7R+
CASSLAGLNSPLHF	1	1.77167e-05	LB4130P	GBM.rec.PBMC	P5_CD4+LTB+IL7R+
CASSLAGMTEAFF	1	1.77167e-05	LB4130P	GBM.rec.PBMC	P5_CD4+LTB+IL7R+
CASSLAGNAGELFF	1	1.77167e-05	LB4130P	GBM.rec.PBMC	P5_CD4+LTB+IL7R+
CASSLAGQGADTQYF	1	1.77167e-05	LB4130P	GBM.rec.PBMC	P6_Treg
CASSLAGQGAYEQYF	1	1.77167e-05	LB4130P	GBM.rec.PBMC	P5_CD4+LTB+IL7R+
CASSLAGQPQHF	1	1.77167e-05	LB4130P	GBM.rec.PBMC	P5_CD4+LTB+IL7R+
CASSLALDGQGTQYF	1	1.77167e-05	LB4130P	GBM.rec.PBMC	P6_Treg
CASSLALSVVTEAFF	1	1.77167e-05	LB4130P	GBM.rec.PBMC	P6_Treg
CASSLAPGLSTFGDTQYF	1	1.77167e-05	LB4130P	GBM.rec.PBMC	P2_CD8+GZMK+
CASSLAPGQGASVQYF	1	1.77167e-05	LB4130P	GBM.rec.PBMC	P5_CD4+LTB+IL7R+
CASSLARGRADTQYF	1	1.77167e-05	LB4130P	GBM.rec.PBMC	P5_CD4+LTB+IL7R+
CASSLARWYEQYF	1	1.77167e-05	LB4130P	GBM.rec.PBMC	P8_CD8+Naive
CASSLASETDSPLHF	1	1.77167e-05	LB4130P	GBM.rec.PBMC	P5_CD4+LTB+IL7R+
CASSLASGHPYGYTF	1	1.77167e-05	LB4130P	GBM.rec.PBMC	P5_CD4+LTB+IL7R+
CASSLASRGYTF	1	1.77167e-05	LB4130P	GBM.rec.PBMC	P3_CTL
CASSLAVWGGGNQPQHF	1	1.77167e-05	LB4130P	GBM.rec.PBMC	P5_CD4+LTB+IL7R+
CASSLAYRGDQTDTQYF	1	1.77167e-05	LB4130P	GBM.rec.PBMC	P5_CD4+LTB+IL7R+
CASSLAYRNEQFF	1	1.77167e-05	LB4130P	GBM.rec.PBMC	P5_CD4+LTB+IL7R+
CASSLDGGHYNEQFF	1	1.77167e-05	LB4130P	GBM.rec.PBMC	P5_CD4+LTB+IL7R+
CASSLDGVLANAYEQYF	1	1.77167e-05	LB4130P	GBM.rec.PBMC	P1_CD8+GZMB+GZMH+
CASSLDGYEQYF	1	1.77167e-05	LB4130P	GBM.rec.PBMC	P8_CD8+Naive
CASSLDIEAGELFF	1	1.77167e-05	LB4130P	GBM.rec.PBMC	P5_CD4+LTB+IL7R+
CASSLDLPGAGQPQHF	1	1.77167e-05	LB4130P	GBM.rec.PBMC	P5_CD4+LTB+IL7R+
CASSLDPPSAQHF	1	1.77167e-05	LB4130P	GBM.rec.PBMC	P5_CD4+LTB+IL7R+
CASSLDPVPNYGYTF	1	1.77167e-05	LB4130P	GBM.rec.PBMC	P2_CD8+GZMK+
CASSLDRDRGSYNSPLHF	1	1.77167e-05	LB4130P	GBM.rec.PBMC	P5_CD4+LTB+IL7R+
CASSLDRLNEKLFF	1	1.77167e-05	LB4130P	GBM.rec.PBMC	P5_CD4+LTB+IL7R+
CASSLDRSNEQFF	1	1.77167e-05	LB4130P	GBM.rec.PBMC	P5_CD4+LTB+IL7R+
CASSLDSGTVNYEQYF	1	1.77167e-05	LB4130P	GBM.rec.PBMC	P7_CD4+Naive
CASSLDSSSYNEQFF	1	1.77167e-05	LB4130P	GBM.rec.PBMC	P5_CD4+LTB+IL7R+
CASSLDTYNSPLHF	1	1.77167e-05	LB4130P	GBM.rec.PBMC	P6_Treg
CASSLDVAGNTIYF	1	1.77167e-05	LB4130P	GBM.rec.PBMC	P5_CD4+LTB+IL7R+
CASSLDYTDTQYF	1	1.77167e-05	LB4130P	GBM.rec.PBMC	P5_CD4+LTB+IL7R+
CASSLEADISINEQFF	1	1.77167e-05	LB4130P	GBM.rec.PBMC	P8_CD8+Naive
CASSLEAGTNEKLFF	1	1.77167e-05	LB4130P	GBM.rec.PBMC	P9_CD4-CD8-_GZMK+
CASSLEATDTQYF	1	1.77167e-05	LB4130P	GBM.rec.PBMC	P5_CD4+LTB+IL7R+
CASSLEDRGTPGELFF	1	1.77167e-05	LB4130P	GBM.rec.PBMC	P5_CD4+LTB+IL7R+
CASSLEETQYF	1	1.77167e-05	LB4130P	GBM.rec.PBMC	P5_CD4+LTB+IL7R+
CASSLEGGAEAFF	1	1.77167e-05	LB4130P	GBM.rec.PBMC	P5_CD4+LTB+IL7R+
CASSLEGGRGTQYF	1	1.77167e-05	LB4130P	GBM.rec.PBMC	P6_Treg
CASSLEGKGGETQYF	1	1.77167e-05	LB4130P	GBM.rec.PBMC	P5_CD4+LTB+IL7R+
CASSLELGQRGNTEAFF	1	1.77167e-05	LB4130P	GBM.rec.PBMC	P5_CD4+LTB+IL7R+
CASSLEPTEALGGANVLTF	1	1.77167e-05	LB4130P	GBM.rec.PBMC	Platelet
CASSLERNTEAFF	1	1.77167e-05	LB4130P	GBM.rec.PBMC	P5_CD4+LTB+IL7R+
CASSLESDTQYF	1	1.77167e-05	LB4130P	GBM.rec.PBMC	P7_CD4+Naive
CASSLEWARAFF	1	1.77167e-05	LB4130P	GBM.rec.PBMC	P1_CD8+GZMB+GZMH+
CASSLFGTGSNQPQHF	1	1.77167e-05	LB4130P	GBM.rec.PBMC	P6_Treg
CASSLFPTSGGAIPVC	1	1.77167e-05	LB4130P	GBM.rec.PBMC	P9_CD4-CD8-_GZMK+
CASSLFQGATDTQYF	1	1.77167e-05	LB4130P	GBM.rec.PBMC	P5_CD4+LTB+IL7R+
CASSLFRTYGYTF	1	1.77167e-05	LB4130P	GBM.rec.PBMC	P1_CD8+GZMB+GZMH+
CASSLGAGMQQYF	1	1.77167e-05	LB4130P	GBM.rec.PBMC	P4_Proliferating
CASSLGDRGRVNREAFF	1	1.77167e-05	LB4130P	GBM.rec.PBMC	P8_CD8+Naive
CASSLGEDSYEQYF	1	1.77167e-05	LB4130P	GBM.rec.PBMC	P8_CD8+Naive
CASSLGEGSSYEQYF	1	1.77167e-05	LB4130P	GBM.rec.PBMC	P8_CD8+Naive
CASSLGGDFYEQYF	1	1.77167e-05	LB4130P	GBM.rec.PBMC	P1_CD8+GZMB+GZMH+
CASSLGGDYDEQYF	1	1.77167e-05	LB4130P	GBM.rec.PBMC	P5_CD4+LTB+IL7R+
CASSLGGIGANVLTF	1	1.77167e-05	LB4130P	GBM.rec.PBMC	P11_CD4-CD8-LTB+IL7R+
CASSLGGLGELFF	1	1.77167e-05	LB4130P	GBM.rec.PBMC	P2_CD8+GZMK+
CASSLGGLRSTDTQYF	1	1.77167e-05	LB4130P	GBM.rec.PBMC	P10_CD4+CD8+Naive
CASSLGGLTNYGYTF	1	1.77167e-05	LB4130P	GBM.rec.PBMC	P5_CD4+LTB+IL7R+
CASSLGGMKADTQYF	1	1.77167e-05	LB4130P	GBM.rec.PBMC	Platelet
CASSLGGNQPQHF	1	1.77167e-05	LB4130P	GBM.rec.PBMC	P1_CD8+GZMB+GZMH+
CASSLGGQVFRGGQPQHF	1	1.77167e-05	LB4130P	GBM.rec.PBMC	P5_CD4+LTB+IL7R+
CASSLGGRGNQPQHF	1	1.77167e-05	LB4130P	GBM.rec.PBMC	P5_CD4+LTB+IL7R+
CASSLGGSNYGYTF	1	1.77167e-05	LB4130P	GBM.rec.PBMC	P1_CD8+GZMB+GZMH+
CASSLGLAGTDEQFF	1	1.77167e-05	LB4130P	GBM.rec.PBMC	P5_CD4+LTB+IL7R+
CASSLGLRGTYEQYF	1	1.77167e-05	LB4130P	GBM.rec.PBMC	P2_CD8+GZMK+
CASSLGLYRADSNQPQHF	1	1.77167e-05	LB4130P	GBM.rec.PBMC	P5_CD4+LTB+IL7R+
CASSLGPGGVLYEQYF	1	1.77167e-05	LB4130P	GBM.rec.PBMC	P2_CD8+GZMK+
CASSLGPGVNTEAFF	1	1.77167e-05	LB4130P	GBM.rec.PBMC	P7_CD4+Naive
CASSLGPTYEQYF	1	1.77167e-05	LB4130P	GBM.rec.PBMC	P8_CD8+Naive
CASSLGQGANSPLHF	1	1.77167e-05	LB4130P	GBM.rec.PBMC	P5_CD4+LTB+IL7R+
CASSLGQGANTEAFF	1	1.77167e-05	LB4130P	GBM.rec.PBMC	P6_Treg
CASSLGQGGDQPQHF	1	1.77167e-05	LB4130P	GBM.rec.PBMC	P5_CD4+LTB+IL7R+
CASSLGQGGLQAF	1	1.77167e-05	LB4130P	GBM.rec.PBMC	P5_CD4+LTB+IL7R+
CASSLGQGKDGYTF	1	1.77167e-05	LB4130P	GBM.rec.PBMC	P5_CD4+LTB+IL7R+
CASSLGQGTIPDTQYF	1	1.77167e-05	LB4130P	GBM.rec.PBMC	P6_Treg
CASSLGQGVTEAFF	1	1.77167e-05	LB4130P	GBM.rec.PBMC	P1_CD8+GZMB+GZMH+
CASSLGRANQPQHF	1	1.77167e-05	LB4130P	GBM.rec.PBMC	P5_CD4+LTB+IL7R+
CASSLGRNYEQYF	1	1.77167e-05	LB4130P	GBM.rec.PBMC	P5_CD4+LTB+IL7R+
CASSLGSNTFNYGYTF	1	1.77167e-05	LB4130P	GBM.rec.PBMC	LowRead
CASSLGTGSLSGANVLTF	1	1.77167e-05	LB4130P	GBM.rec.PBMC	P8_CD8+Naive
CASSLGVSTNEKLFF	1	1.77167e-05	LB4130P	GBM.rec.PBMC	P5_CD4+LTB+IL7R+
CASSLHGGFSYNEQFF	1	1.77167e-05	LB4130P	GBM.rec.PBMC	P8_CD8+Naive
CASSLHSGGAWDTQYF	1	1.77167e-05	LB4130P	GBM.rec.PBMC	P5_CD4+LTB+IL7R+
CASSLIGGGVAEEQFF	1	1.77167e-05	LB4130P	GBM.rec.PBMC	P5_CD4+LTB+IL7R+
CASSLINLGNMNTEAFF	1	1.77167e-05	LB4130P	GBM.rec.PBMC	P5_CD4+LTB+IL7R+
CASSLISYEQYF	1	1.77167e-05	LB4130P	GBM.rec.PBMC	P1_CD8+GZMB+GZMH+
CASSLITGELFF	1	1.77167e-05	LB4130P	GBM.rec.PBMC	P6_Treg
CASSLIVRGEQYF	1	1.77167e-05	LB4130P	GBM.rec.PBMC	P5_CD4+LTB+IL7R+
CASSLIWVPIFFPKYNEQFF	1	1.77167e-05	LB4130P	GBM.rec.PBMC	P1_CD8+GZMB+GZMH+
CASSLKPGLAGRNTQYF	1	1.77167e-05	LB4130P	GBM.rec.PBMC	P5_CD4+LTB+IL7R+
CASSLKQTVDFYGYTF	1	1.77167e-05	LB4130P	GBM.rec.PBMC	P2_CD8+GZMK+
CASSLLERNTEAFF	1	1.77167e-05	LB4130P	GBM.rec.PBMC	P5_CD4+LTB+IL7R+
CASSLLGTGNTIYF	1	1.77167e-05	LB4130P	GBM.rec.PBMC	P5_CD4+LTB+IL7R+
CASSLLGTRTDTQYF	1	1.77167e-05	LB4130P	GBM.rec.PBMC	P6_Treg
CASSLLGTSGNYEQYF	1	1.77167e-05	LB4130P	GBM.rec.PBMC	P2_CD8+GZMK+
CASSLLGTSYEQYF	1	1.77167e-05	LB4130P	GBM.rec.PBMC	P5_CD4+LTB+IL7R+
CASSLLGVRGSYNEQFF	1	1.77167e-05	LB4130P	GBM.rec.PBMC	P5_CD4+LTB+IL7R+
CASSLLGVTQYF	1	1.77167e-05	LB4130P	GBM.rec.PBMC	P1_CD8+GZMB+GZMH+
CASSLLPGELYEQYF	1	1.77167e-05	LB4130P	GBM.rec.PBMC	P9_CD4-CD8-_GZMK+
CASSLLPYEQYF	1	1.77167e-05	LB4130P	GBM.rec.PBMC	P6_Treg
CASSLLSGVSETQYF	1	1.77167e-05	LB4130P	GBM.rec.PBMC	P6_Treg
CASSLLSNQPQHF	1	1.77167e-05	LB4130P	GBM.rec.PBMC	P5_CD4+LTB+IL7R+
CASSLLVSGSYGYTF	1	1.77167e-05	LB4130P	GBM.rec.PBMC	Platelet
CASSLLVSNEKLFF	1	1.77167e-05	LB4130P	GBM.rec.PBMC	P5_CD4+LTB+IL7R+
CASSLMGGKNIQYF	1	1.77167e-05	LB4130P	GBM.rec.PBMC	P5_CD4+LTB+IL7R+
CASSLMGSTDTQYF	1	1.77167e-05	LB4130P	GBM.rec.PBMC	P5_CD4+LTB+IL7R+
CASSLMKGMGGYTF	1	1.77167e-05	LB4130P	GBM.rec.PBMC	P5_CD4+LTB+IL7R+
CASSLMSTDTQYF	1	1.77167e-05	LB4130P	GBM.rec.PBMC	P3_CTL
CASSLNEETQYF	1	1.77167e-05	LB4130P	GBM.rec.PBMC	P6_Treg
CASSLNPGDYGYTF	1	1.77167e-05	LB4130P	GBM.rec.PBMC	P2_CD8+GZMK+
CASSLNPRGTGLGEQYF	1	1.77167e-05	LB4130P	GBM.rec.PBMC	P7_CD4+Naive
CASSLNYGYTF	1	1.77167e-05	LB4130P	GBM.rec.PBMC	P8_CD8+Naive
CASSLPAGDANTGELFF	1	1.77167e-05	LB4130P	GBM.rec.PBMC	P8_CD8+Naive
CASSLPGAVNTEAFF	1	1.77167e-05	LB4130P	GBM.rec.PBMC	P4_Proliferating
CASSLPGLAGVNHGQYF	1	1.77167e-05	LB4130P	GBM.rec.PBMC	P8_CD8+Naive
CASSLPLAGGPRSETQYF	1	1.77167e-05	LB4130P	GBM.rec.PBMC	P8_CD8+Naive
CASSLPLGRNTEAFF	1	1.77167e-05	LB4130P	GBM.rec.PBMC	P2_CD8+GZMK+
CASSLPPQRTYTF	1	1.77167e-05	LB4130P	GBM.rec.PBMC	P5_CD4+LTB+IL7R+
CASSLPYSPLHF	1	1.77167e-05	LB4130P	GBM.rec.PBMC	P5_CD4+LTB+IL7R+
CASSLQGALTYNEQFF	1	1.77167e-05	LB4130P	GBM.rec.PBMC	P7_CD4+Naive
CASSLQGVGGELFF	1	1.77167e-05	LB4130P	GBM.rec.PBMC	P6_Treg
CASSLQQGGTGELFF	1	1.77167e-05	LB4130P	GBM.rec.PBMC	P5_CD4+LTB+IL7R+
CASSLRDSNQPQHF	1	1.77167e-05	LB4130P	GBM.rec.PBMC	Platelet
CASSLREGAKYF	1	1.77167e-05	LB4130P	GBM.rec.PBMC	P6_Treg
CASSLRFWGLYSNQPQHF	1	1.77167e-05	LB4130P	GBM.rec.PBMC	P5_CD4+LTB+IL7R+
CASSLRPGLAYQETQYF	1	1.77167e-05	LB4130P	GBM.rec.PBMC	P5_CD4+LTB+IL7R+
CASSLRPRTPLDTYEQYF	1	1.77167e-05	LB4130P	GBM.rec.PBMC	P5_CD4+LTB+IL7R+
CASSLRRGVHEQYF	1	1.77167e-05	LB4130P	GBM.rec.PBMC	P8_CD8+Naive
CASSLRSGGTQETQYF	1	1.77167e-05	LB4130P	GBM.rec.PBMC	P2_CD8+GZMK+
CASSLRSRVLTEAFF	1	1.77167e-05	LB4130P	GBM.rec.PBMC	P5_CD4+LTB+IL7R+
CASSLRTASGNTIYF	1	1.77167e-05	LB4130P	GBM.rec.PBMC	P5_CD4+LTB+IL7R+
CASSLRTGATNEKLFF	1	1.77167e-05	LB4130P	GBM.rec.PBMC	P5_CD4+LTB+IL7R+
CASSLRVGSSYEQYF	1	1.77167e-05	LB4130P	GBM.rec.PBMC	P7_CD4+Naive
CASSLRWGEQYF	1	1.77167e-05	LB4130P	GBM.rec.PBMC	P5_CD4+LTB+IL7R+
CASSLSGEHGGYTF	1	1.77167e-05	LB4130P	GBM.rec.PBMC	P6_Treg
CASSLSGGAFYEQFF	1	1.77167e-05	LB4130P	GBM.rec.PBMC	P5_CD4+LTB+IL7R+
CASSLSGGEGTGELFF	1	1.77167e-05	LB4130P	GBM.rec.PBMC	P5_CD4+LTB+IL7R+
CASSLSGQGLSNSPLHF	1	1.77167e-05	LB4130P	GBM.rec.PBMC	P2_CD8+GZMK+
CASSLSGRLDTQYF	1	1.77167e-05	LB4130P	GBM.rec.PBMC	P5_CD4+LTB+IL7R+
CASSLSGTLNEQFF	1	1.77167e-05	LB4130P	GBM.rec.PBMC	P5_CD4+LTB+IL7R+
CASSLSLTLANYGYTF	1	1.77167e-05	LB4130P	GBM.rec.PBMC	P5_CD4+LTB+IL7R+
CASSLSRNQPQHF	1	1.77167e-05	LB4130P	GBM.rec.PBMC	P5_CD4+LTB+IL7R+
CASSLSRQETQYF	1	1.77167e-05	LB4130P	GBM.rec.PBMC	P5_CD4+LTB+IL7R+
CASSLSSGGGASEQFF	1	1.77167e-05	LB4130P	GBM.rec.PBMC	P5_CD4+LTB+IL7R+
CASSLSTIQYF	1	1.77167e-05	LB4130P	GBM.rec.PBMC	P5_CD4+LTB+IL7R+
CASSLSYEQYF	1	1.77167e-05	LB4130P	GBM.rec.PBMC	P2_CD8+GZMK+
CASSLTATEQYF	1	1.77167e-05	LB4130P	GBM.rec.PBMC	P8_CD8+Naive
CASSLTGGSNTEAFF	1	1.77167e-05	LB4130P	GBM.rec.PBMC	Platelet
CASSLTGGTNTEAFF	1	1.77167e-05	LB4130P	GBM.rec.PBMC	P7_CD4+Naive
CASSLTGLFEQVNTEAFF	1	1.77167e-05	LB4130P	GBM.rec.PBMC	P5_CD4+LTB+IL7R+
CASSLTGSQPQHF	1	1.77167e-05	LB4130P	GBM.rec.PBMC	LowRead
CASSLTQGAEYGYTF	1	1.77167e-05	LB4130P	GBM.rec.PBMC	P5_CD4+LTB+IL7R+
CASSLTSGYTDTQYF	1	1.77167e-05	LB4130P	GBM.rec.PBMC	P8_CD8+Naive
CASSLTTGAGGANVLTF	1	1.77167e-05	LB4130P	GBM.rec.PBMC	P5_CD4+LTB+IL7R+
CASSLTTSPGSDEQFF	1	1.77167e-05	LB4130P	GBM.rec.PBMC	P8_CD8+Naive
CASSLVAGQFGGYTF	1	1.77167e-05	LB4130P	GBM.rec.PBMC	P5_CD4+LTB+IL7R+
CASSLVATGPYNEQFF	1	1.77167e-05	LB4130P	GBM.rec.PBMC	P5_CD4+LTB+IL7R+
CASSLVEEEYGYTF	1	1.77167e-05	LB4130P	GBM.rec.PBMC	P5_CD4+LTB+IL7R+
CASSLVGAGNTEAFF	1	1.77167e-05	LB4130P	GBM.rec.PBMC	P8_CD8+Naive
CASSLVGGIPPTEAFF	1	1.77167e-05	LB4130P	GBM.rec.PBMC	Platelet
CASSLVGGRGEETQYF	1	1.77167e-05	LB4130P	GBM.rec.PBMC	P2_CD8+GZMK+
CASSLVGLVVAYF	1	1.77167e-05	LB4130P	GBM.rec.PBMC	P1_CD8+GZMB+GZMH+
CASSLVGQGVGYGYTF	1	1.77167e-05	LB4130P	GBM.rec.PBMC	P5_CD4+LTB+IL7R+
CASSLVGRTDTQYF	1	1.77167e-05	LB4130P	GBM.rec.PBMC	P5_CD4+LTB+IL7R+
CASSLVGSGRNYGYTF	1	1.77167e-05	LB4130P	GBM.rec.PBMC	P5_CD4+LTB+IL7R+
CASSLVGYEQYF	1	1.77167e-05	LB4130P	GBM.rec.PBMC	P2_CD8+GZMK+
CASSLVLAGTKRSQETQYF	1	1.77167e-05	LB4130P	GBM.rec.PBMC	P1_CD8+GZMB+GZMH+
CASSLVNSDETQYF	1	1.77167e-05	LB4130P	GBM.rec.PBMC	P1_CD8+GZMB+GZMH+
CASSLVPGTGSSYNSPLHF	1	1.77167e-05	LB4130P	GBM.rec.PBMC	P5_CD4+LTB+IL7R+
CASSLVQDETQYF	1	1.77167e-05	LB4130P	GBM.rec.PBMC	P2_CD8+GZMK+
CASSLVRGSSNNEQFF	1	1.77167e-05	LB4130P	GBM.rec.PBMC	P5_CD4+LTB+IL7R+
CASSLVRGSTEAFF	1	1.77167e-05	LB4130P	GBM.rec.PBMC	P5_CD4+LTB+IL7R+
CASSLVRVGPSSPLHF	1	1.77167e-05	LB4130P	GBM.rec.PBMC	P12_CD4-CD8-XCL1+XCL2+
CASSLVTGQETQYF	1	1.77167e-05	LB4130P	GBM.rec.PBMC	P4_Proliferating
CASSLWDGIRTEAFF	1	1.77167e-05	LB4130P	GBM.rec.PBMC	P6_Treg
CASSLWGQELYGYTF	1	1.77167e-05	LB4130P	GBM.rec.PBMC	P1_CD8+GZMB+GZMH+
CASSLWGSEGTPLHF	1	1.77167e-05	LB4130P	GBM.rec.PBMC	P1_CD8+GZMB+GZMH+
CASSLWGSSTDTQYF	1	1.77167e-05	LB4130P	GBM.rec.PBMC	P5_CD4+LTB+IL7R+
CASSLYGQGSTGELFF	1	1.77167e-05	LB4130P	GBM.rec.PBMC	P6_Treg
CASSLYWRGLENTGELFF	1	1.77167e-05	LB4130P	GBM.rec.PBMC	P5_CD4+LTB+IL7R+
CASSMTGMPNQPQHF	1	1.77167e-05	LB4130P	GBM.rec.PBMC	P5_CD4+LTB+IL7R+
CASSNGGEKLFF	1	1.77167e-05	LB4130P	GBM.rec.PBMC	P5_CD4+LTB+IL7R+
CASSNLMGGGQPQHF	1	1.77167e-05	LB4130P	GBM.rec.PBMC	P5_CD4+LTB+IL7R+
CASSNPGTGVREAFF	1	1.77167e-05	LB4130P	GBM.rec.PBMC	P9_CD4-CD8-_GZMK+
CASSNRGNSPLHF	1	1.77167e-05	LB4130P	GBM.rec.PBMC	P5_CD4+LTB+IL7R+
CASSPADTQYF	1	1.77167e-05	LB4130P	GBM.rec.PBMC	Platelet
CASSPAGYEQYF	1	1.77167e-05	LB4130P	GBM.rec.PBMC	P2_CD8+GZMK+
CASSPDGGGGYGYTF	1	1.77167e-05	LB4130P	GBM.rec.PBMC	P5_CD4+LTB+IL7R+
CASSPDRAGNTEAFF	1	1.77167e-05	LB4130P	GBM.rec.PBMC	P6_Treg
CASSPDSGATGYTF	1	1.77167e-05	LB4130P	GBM.rec.PBMC	P11_CD4-CD8-LTB+IL7R+
CASSPEGANVLTF	1	1.77167e-05	LB4130P	GBM.rec.PBMC	P5_CD4+LTB+IL7R+
CASSPEYNYEQYF	1	1.77167e-05	LB4130P	GBM.rec.PBMC	P5_CD4+LTB+IL7R+
CASSPGGADNQPQHF	1	1.77167e-05	LB4130P	GBM.rec.PBMC	P5_CD4+LTB+IL7R+
CASSPGGATGELFF	1	1.77167e-05	LB4130P	GBM.rec.PBMC	P5_CD4+LTB+IL7R+
CASSPGGPYNEQFF	1	1.77167e-05	LB4130P	GBM.rec.PBMC	P5_CD4+LTB+IL7R+
CASSPGLAGGKTDTQYF	1	1.77167e-05	LB4130P	GBM.rec.PBMC	P5_CD4+LTB+IL7R+
CASSPGQGKGGYTF	1	1.77167e-05	LB4130P	GBM.rec.PBMC	P2_CD8+GZMK+
CASSPGQGYEQFF	1	1.77167e-05	LB4130P	GBM.rec.PBMC	P1_CD8+GZMB+GZMH+
CASSPGRMNTEAFF	1	1.77167e-05	LB4130P	GBM.rec.PBMC	P5_CD4+LTB+IL7R+
CASSPGRTAAYEQYF	1	1.77167e-05	LB4130P	GBM.rec.PBMC	P5_CD4+LTB+IL7R+
CASSPGTGEGSTEAFF	1	1.77167e-05	LB4130P	GBM.rec.PBMC	P5_CD4+LTB+IL7R+
CASSPGTISYNEQFF	1	1.77167e-05	LB4130P	GBM.rec.PBMC	P11_CD4-CD8-LTB+IL7R+
CASSPGTPGSRYEQYF	1	1.77167e-05	LB4130P	GBM.rec.PBMC	P8_CD8+Naive
CASSPGTPLGNTIYF	1	1.77167e-05	LB4130P	GBM.rec.PBMC	P6_Treg
CASSPGTPNNSPLHF	1	1.77167e-05	LB4130P	GBM.rec.PBMC	P5_CD4+LTB+IL7R+
CASSPGVLASDTQYF	1	1.77167e-05	LB4130P	GBM.rec.PBMC	P2_CD8+GZMK+
CASSPGWAETTTNEKLFF	1	1.77167e-05	LB4130P	GBM.rec.PBMC	P5_CD4+LTB+IL7R+
CASSPHRTGGDNEQFF	1	1.77167e-05	LB4130P	GBM.rec.PBMC	P8_CD8+Naive
CASSPIAGGLTDTQYF	1	1.77167e-05	LB4130P	GBM.rec.PBMC	P2_CD8+GZMK+
CASSPIKGDEKLFF	1	1.77167e-05	LB4130P	GBM.rec.PBMC	P5_CD4+LTB+IL7R+
CASSPISQETQYF	1	1.77167e-05	LB4130P	GBM.rec.PBMC	P5_CD4+LTB+IL7R+
CASSPKTIKRDEQYF	1	1.77167e-05	LB4130P	GBM.rec.PBMC	P1_CD8+GZMB+GZMH+
CASSPLAGGYQETQYF	1	1.77167e-05	LB4130P	GBM.rec.PBMC	P5_CD4+LTB+IL7R+
CASSPLPVSTDTQYF	1	1.77167e-05	LB4130P	GBM.rec.PBMC	P2_CD8+GZMK+
CASSPLRVPSYNEQFF	1	1.77167e-05	LB4130P	GBM.rec.PBMC	LowRead
CASSPLSGGAIGPDTQYF	1	1.77167e-05	LB4130P	GBM.rec.PBMC	P9_CD4-CD8-_GZMK+
CASSPLVDRVDGYTF	1	1.77167e-05	LB4130P	GBM.rec.PBMC	P5_CD4+LTB+IL7R+
CASSPNPPGAGYNEQFF	1	1.77167e-05	LB4130P	GBM.rec.PBMC	P5_CD4+LTB+IL7R+
CASSPPGGTEAFF	1	1.77167e-05	LB4130P	GBM.rec.PBMC	P2_CD8+GZMK+
CASSPPLLVPTRGEQYF	1	1.77167e-05	LB4130P	GBM.rec.PBMC	P5_CD4+LTB+IL7R+
CASSPPLTPTEAFF	1	1.77167e-05	LB4130P	GBM.rec.PBMC	P2_CD8+GZMK+
CASSPPNPGQGKRNEKLFF	1	1.77167e-05	LB4130P	GBM.rec.PBMC	P6_Treg
CASSPPRGEQFF	1	1.77167e-05	LB4130P	GBM.rec.PBMC	P2_CD8+GZMK+
CASSPPSDRVDNEKLFF	1	1.77167e-05	LB4130P	GBM.rec.PBMC	P2_CD8+GZMK+
CASSPQLAGASEQFF	1	1.77167e-05	LB4130P	GBM.rec.PBMC	P5_CD4+LTB+IL7R+
CASSPRGSTSTDTQYF	1	1.77167e-05	LB4130P	GBM.rec.PBMC	P5_CD4+LTB+IL7R+
CASSPRLAGDRGTQYF	1	1.77167e-05	LB4130P	GBM.rec.PBMC	P7_CD4+Naive
CASSPRPGTSVNEQFF	1	1.77167e-05	LB4130P	GBM.rec.PBMC	P5_CD4+LTB+IL7R+
CASSPRQGSGNTIYF	1	1.77167e-05	LB4130P	GBM.rec.PBMC	P5_CD4+LTB+IL7R+
CASSPRTVNTEAFF	1	1.77167e-05	LB4130P	GBM.rec.PBMC	P5_CD4+LTB+IL7R+
CASSPRVSDEKLFF	1	1.77167e-05	LB4130P	GBM.rec.PBMC	P7_CD4+Naive
CASSPSGEARLDEQYF	1	1.77167e-05	LB4130P	GBM.rec.PBMC	P8_CD8+Naive
CASSPSGGRGDTQYF	1	1.77167e-05	LB4130P	GBM.rec.PBMC	P5_CD4+LTB+IL7R+
CASSPSGKTSGYYNEQFF	1	1.77167e-05	LB4130P	GBM.rec.PBMC	P2_CD8+GZMK+
CASSPSIWTGVYGYTF	1	1.77167e-05	LB4130P	GBM.rec.PBMC	P2_CD8+GZMK+
CASSPSLNTEAFF	1	1.77167e-05	LB4130P	GBM.rec.PBMC	P5_CD4+LTB+IL7R+
CASSPSVANEQFF	1	1.77167e-05	LB4130P	GBM.rec.PBMC	P5_CD4+LTB+IL7R+
CASSPTGGINQPQHF	1	1.77167e-05	LB4130P	GBM.rec.PBMC	P2_CD8+GZMK+
CASSPTGGQFLAKNIQYF	1	1.77167e-05	LB4130P	GBM.rec.PBMC	P1_CD8+GZMB+GZMH+
CASSPTGLDAFF	1	1.77167e-05	LB4130P	GBM.rec.PBMC	P1_CD8+GZMB+GZMH+
CASSPTPLGVTMNTEAFF	1	1.77167e-05	LB4130P	GBM.rec.PBMC	P2_CD8+GZMK+
CASSPVGYEQYF	1	1.77167e-05	LB4130P	GBM.rec.PBMC	P9_CD4-CD8-_GZMK+
CASSPVVQGSYNEQFF	1	1.77167e-05	LB4130P	GBM.rec.PBMC	P8_CD8+Naive
CASSPWGEPYGYTF	1	1.77167e-05	LB4130P	GBM.rec.PBMC	P9_CD4-CD8-_GZMK+
CASSPYLRTGENQPQHF	1	1.77167e-05	LB4130P	GBM.rec.PBMC	L/M doublet
CASSPYRFFEKLFF	1	1.77167e-05	LB4130P	GBM.rec.PBMC	P9_CD4-CD8-_GZMK+
CASSQAALSNTEAFF	1	1.77167e-05	LB4130P	GBM.rec.PBMC	P6_Treg
CASSQALNSPLHF	1	1.77167e-05	LB4130P	GBM.rec.PBMC	P1_CD8+GZMB+GZMH+
CASSQARGGSGNTIYF	1	1.77167e-05	LB4130P	GBM.rec.PBMC	P1_CD8+GZMB+GZMH+
CASSQARNTEAFF	1	1.77167e-05	LB4130P	GBM.rec.PBMC	P3_CTL
CASSQASTGTGNTIYF	1	1.77167e-05	LB4130P	GBM.rec.PBMC	P2_CD8+GZMK+
CASSQATAGIETQYF	1	1.77167e-05	LB4130P	GBM.rec.PBMC	P1_CD8+GZMB+GZMH+
CASSQAWLDTQYF	1	1.77167e-05	LB4130P	GBM.rec.PBMC	P5_CD4+LTB+IL7R+
CASSQAWLNTEAFF	1	1.77167e-05	LB4130P	GBM.rec.PBMC	P1_CD8+GZMB+GZMH+
CASSQDGPKKQETQYF	1	1.77167e-05	LB4130P	GBM.rec.PBMC	P5_CD4+LTB+IL7R+
CASSQDGTGDNEKLFF	1	1.77167e-05	LB4130P	GBM.rec.PBMC	P5_CD4+LTB+IL7R+
CASSQDIQRGGRETQYF	1	1.77167e-05	LB4130P	GBM.rec.PBMC	P5_CD4+LTB+IL7R+
CASSQDLGATEAFF	1	1.77167e-05	LB4130P	GBM.rec.PBMC	P5_CD4+LTB+IL7R+
CASSQDLGHHYGYTF	1	1.77167e-05	LB4130P	GBM.rec.PBMC	LowRead
CASSQDPETQYF	1	1.77167e-05	LB4130P	GBM.rec.PBMC	P5_CD4+LTB+IL7R+
CASSQDPSAGELFF	1	1.77167e-05	LB4130P	GBM.rec.PBMC	P2_CD8+GZMK+
CASSQDPTYGGPQYF	1	1.77167e-05	LB4130P	GBM.rec.PBMC	P5_CD4+LTB+IL7R+
CASSQDQGYEQYF	1	1.77167e-05	LB4130P	GBM.rec.PBMC	P6_Treg
CASSQDRGELFF	1	1.77167e-05	LB4130P	GBM.rec.PBMC	P5_CD4+LTB+IL7R+
CASSQDTAYNEQFF	1	1.77167e-05	LB4130P	GBM.rec.PBMC	Platelet
CASSQDVATSYNEQFF	1	1.77167e-05	LB4130P	GBM.rec.PBMC	Platelet
CASSQEGQRSSYNEQFF	1	1.77167e-05	LB4130P	GBM.rec.PBMC	P8_CD8+Naive
CASSQEGSGAAYEQYF	1	1.77167e-05	LB4130P	GBM.rec.PBMC	Platelet
CASSQEMEDAMLYGYTF	1	1.77167e-05	LB4130P	GBM.rec.PBMC	P4_Proliferating
CASSQGDRISTEQYF	1	1.77167e-05	LB4130P	GBM.rec.PBMC	P5_CD4+LTB+IL7R+
CASSQGGERQGPDTQYF	1	1.77167e-05	LB4130P	GBM.rec.PBMC	P6_Treg
CASSQGGWNTEAFF	1	1.77167e-05	LB4130P	GBM.rec.PBMC	P2_CD8+GZMK+
CASSQGKAGAYEQYF	1	1.77167e-05	LB4130P	GBM.rec.PBMC	P5_CD4+LTB+IL7R+
CASSQGLALADTQYF	1	1.77167e-05	LB4130P	GBM.rec.PBMC	P6_Treg
CASSQGLALNEQFF	1	1.77167e-05	LB4130P	GBM.rec.PBMC	P1_CD8+GZMB+GZMH+
CASSQGLGYEQYF	1	1.77167e-05	LB4130P	GBM.rec.PBMC	P5_CD4+LTB+IL7R+
CASSQGPLGQSTGNEQFF	1	1.77167e-05	LB4130P	GBM.rec.PBMC	P1_CD8+GZMB+GZMH+
CASSQGQGDTGELFF	1	1.77167e-05	LB4130P	GBM.rec.PBMC	P11_CD4-CD8-LTB+IL7R+
CASSQGRTLTGELFF	1	1.77167e-05	LB4130P	GBM.rec.PBMC	P1_CD8+GZMB+GZMH+
CASSQGVGIIGNTIYF	1	1.77167e-05	LB4130P	GBM.rec.PBMC	P9_CD4-CD8-_GZMK+
CASSQIGWTLNTEAFF	1	1.77167e-05	LB4130P	GBM.rec.PBMC	P6_Treg
CASSQLGTGTEAFF	1	1.77167e-05	LB4130P	GBM.rec.PBMC	P5_CD4+LTB+IL7R+
CASSQLSGGPGDEQFF	1	1.77167e-05	LB4130P	GBM.rec.PBMC	P2_CD8+GZMK+
CASSQPDRVDEKLFF	1	1.77167e-05	LB4130P	GBM.rec.PBMC	P5_CD4+LTB+IL7R+
CASSQRSAGNLAKNIQYF	1	1.77167e-05	LB4130P	GBM.rec.PBMC	P6_Treg
CASSQSGGKETQYF	1	1.77167e-05	LB4130P	GBM.rec.PBMC	P5_CD4+LTB+IL7R+
CASSQSGLWETQYF	1	1.77167e-05	LB4130P	GBM.rec.PBMC	P1_CD8+GZMB+GZMH+
CASSQTSGGFNEQFF	1	1.77167e-05	LB4130P	GBM.rec.PBMC	P1_CD8+GZMB+GZMH+
CASSQVAGFAYEQYF	1	1.77167e-05	LB4130P	GBM.rec.PBMC	P5_CD4+LTB+IL7R+
CASSQVGGSYEQYF	1	1.77167e-05	LB4130P	GBM.rec.PBMC	P6_Treg
CASSQVLAGTDTQYF	1	1.77167e-05	LB4130P	GBM.rec.PBMC	P7_CD4+Naive
CASSQVQGSFYEQYF	1	1.77167e-05	LB4130P	GBM.rec.PBMC	P5_CD4+LTB+IL7R+
CASSQVRAYNEQFF	1	1.77167e-05	LB4130P	GBM.rec.PBMC	P9_CD4-CD8-_GZMK+
CASSQVRQDEQFF	1	1.77167e-05	LB4130P	GBM.rec.PBMC	P5_CD4+LTB+IL7R+
CASSQVRTSLVEETQYF	1	1.77167e-05	LB4130P	GBM.rec.PBMC	P2_CD8+GZMK+
CASSQVSAYGYTF	1	1.77167e-05	LB4130P	GBM.rec.PBMC	P5_CD4+LTB+IL7R+
CASSQVSGGGRETQYF	1	1.77167e-05	LB4130P	GBM.rec.PBMC	P5_CD4+LTB+IL7R+
CASSQVSMGNEKLFF	1	1.77167e-05	LB4130P	GBM.rec.PBMC	P6_Treg
CASSQVSWFVRGGNTGELFF	1	1.77167e-05	LB4130P	GBM.rec.PBMC	P5_CD4+LTB+IL7R+
CASSRAESYGYTF	1	1.77167e-05	LB4130P	GBM.rec.PBMC	P5_CD4+LTB+IL7R+
CASSRAGQVDQPQHF	1	1.77167e-05	LB4130P	GBM.rec.PBMC	P5_CD4+LTB+IL7R+
CASSRDDRGAPHEQYF	1	1.77167e-05	LB4130P	GBM.rec.PBMC	P9_CD4-CD8-_GZMK+
CASSRGGNEQFF	1	1.77167e-05	LB4130P	GBM.rec.PBMC	P6_Treg
CASSRGTGYDGYTF	1	1.77167e-05	LB4130P	GBM.rec.PBMC	P5_CD4+LTB+IL7R+
CASSRGVSPLHF	1	1.77167e-05	LB4130P	GBM.rec.PBMC	P6_Treg
CASSRIAGDTGAIQYF	1	1.77167e-05	LB4130P	GBM.rec.PBMC	P5_CD4+LTB+IL7R+
CASSRIMSPESEQFF	1	1.77167e-05	LB4130P	GBM.rec.PBMC	Platelet
CASSRKLAWETQYF	1	1.77167e-05	LB4130P	GBM.rec.PBMC	P1_CD8+GZMB+GZMH+
CASSRMLSGELFF	1	1.77167e-05	LB4130P	GBM.rec.PBMC	P5_CD4+LTB+IL7R+
CASSRPGGDEKLFF	1	1.77167e-05	LB4130P	GBM.rec.PBMC	P5_CD4+LTB+IL7R+
CASSRPRGSQETQYF	1	1.77167e-05	LB4130P	GBM.rec.PBMC	P5_CD4+LTB+IL7R+
CASSRRGAGNTIYF	1	1.77167e-05	LB4130P	GBM.rec.PBMC	P2_CD8+GZMK+
CASSRRTGGDLEEKLFF	1	1.77167e-05	LB4130P	GBM.rec.PBMC	P2_CD8+GZMK+
CASSRSAGGPVIEQFF	1	1.77167e-05	LB4130P	GBM.rec.PBMC	P5_CD4+LTB+IL7R+
CASSRSNEQFF	1	1.77167e-05	LB4130P	GBM.rec.PBMC	P5_CD4+LTB+IL7R+
CASSRTGGREQFF	1	1.77167e-05	LB4130P	GBM.rec.PBMC	P5_CD4+LTB+IL7R+
CASSRTGGRGNTIYF	1	1.77167e-05	LB4130P	GBM.rec.PBMC	P5_CD4+LTB+IL7R+
CASSRTGSRNQPQHF	1	1.77167e-05	LB4130P	GBM.rec.PBMC	P5_CD4+LTB+IL7R+
CASSRTLQETQYF	1	1.77167e-05	LB4130P	GBM.rec.PBMC	P5_CD4+LTB+IL7R+
CASSRVTGAEKLFF	1	1.77167e-05	LB4130P	GBM.rec.PBMC	P5_CD4+LTB+IL7R+
CASSSADTQYF	1	1.77167e-05	LB4130P	GBM.rec.PBMC	P5_CD4+LTB+IL7R+
CASSSALKNYEQYF	1	1.77167e-05	LB4130P	GBM.rec.PBMC	Platelet
CASSSATGLVGETQYF	1	1.77167e-05	LB4130P	GBM.rec.PBMC	P9_CD4-CD8-_GZMK+
CASSSDSGNTIYF	1	1.77167e-05	LB4130P	GBM.rec.PBMC	P5_CD4+LTB+IL7R+
CASSSEPPSSIYF	1	1.77167e-05	LB4130P	GBM.rec.PBMC	P5_CD4+LTB+IL7R+
CASSSFGETQYF	1	1.77167e-05	LB4130P	GBM.rec.PBMC	Platelet
CASSSGGYEQFF	1	1.77167e-05	LB4130P	GBM.rec.PBMC	P1_CD8+GZMB+GZMH+
CASSSGLATDTQYF	1	1.77167e-05	LB4130P	GBM.rec.PBMC	P5_CD4+LTB+IL7R+
CASSSGLQGFYGYTF	1	1.77167e-05	LB4130P	GBM.rec.PBMC	P6_Treg
CASSSGQGFNTGELFF	1	1.77167e-05	LB4130P	GBM.rec.PBMC	P7_CD4+Naive
CASSSGVTQYF	1	1.77167e-05	LB4130P	GBM.rec.PBMC	P5_CD4+LTB+IL7R+
CASSSHGQDNEQFF	1	1.77167e-05	LB4130P	GBM.rec.PBMC	P8_CD8+Naive
CASSSHGQGFSGYTF	1	1.77167e-05	LB4130P	GBM.rec.PBMC	P5_CD4+LTB+IL7R+
CASSSIGGTEAFF	1	1.77167e-05	LB4130P	GBM.rec.PBMC	P5_CD4+LTB+IL7R+
CASSSINGGGEAFF	1	1.77167e-05	LB4130P	GBM.rec.PBMC	P5_CD4+LTB+IL7R+
CASSSIRAAHEQYF	1	1.77167e-05	LB4130P	GBM.rec.PBMC	P1_CD8+GZMB+GZMH+
CASSSLAGGNQETQYF	1	1.77167e-05	LB4130P	GBM.rec.PBMC	P5_CD4+LTB+IL7R+
CASSSLRESYNSPLHF	1	1.77167e-05	LB4130P	GBM.rec.PBMC	P5_CD4+LTB+IL7R+
CASSSLRQPTLHF	1	1.77167e-05	LB4130P	GBM.rec.PBMC	P1_CD8+GZMB+GZMH+
CASSSLRRDSVEAFF	1	1.77167e-05	LB4130P	GBM.rec.PBMC	P7_CD4+Naive
CASSSLWQGPPYYGYTF	1	1.77167e-05	LB4130P	GBM.rec.PBMC	P5_CD4+LTB+IL7R+
CASSSNLLDRVGTEAFF	1	1.77167e-05	LB4130P	GBM.rec.PBMC	P5_CD4+LTB+IL7R+
CASSSPPGTSGGDHGGHTQYF	1	1.77167e-05	LB4130P	GBM.rec.PBMC	P8_CD8+Naive
CASSSPRPVWGNTGELFF	1	1.77167e-05	LB4130P	GBM.rec.PBMC	P5_CD4+LTB+IL7R+
CASSSPRSPLHF	1	1.77167e-05	LB4130P	GBM.rec.PBMC	P5_CD4+LTB+IL7R+
CASSSQGDEQFF	1	1.77167e-05	LB4130P	GBM.rec.PBMC	P2_CD8+GZMK+
CASSSRGTGGRSPLHF	1	1.77167e-05	LB4130P	GBM.rec.PBMC	P7_CD4+Naive
CASSSRISGTQYF	1	1.77167e-05	LB4130P	GBM.rec.PBMC	P6_Treg
CASSSRQGTYEQYF	1	1.77167e-05	LB4130P	GBM.rec.PBMC	P5_CD4+LTB+IL7R+
CASSSRRGNTEAFF	1	1.77167e-05	LB4130P	GBM.rec.PBMC	P5_CD4+LTB+IL7R+
CASSSRSGGINYEQYF	1	1.77167e-05	LB4130P	GBM.rec.PBMC	P5_CD4+LTB+IL7R+
CASSSRTGSMNTEAFF	1	1.77167e-05	LB4130P	GBM.rec.PBMC	P5_CD4+LTB+IL7R+
CASSSRVGGRGPDTQYF	1	1.77167e-05	LB4130P	GBM.rec.PBMC	P5_CD4+LTB+IL7R+
CASSSSDRGRTGELFF	1	1.77167e-05	LB4130P	GBM.rec.PBMC	P10_CD4+CD8+Naive
CASSSSGGETDTQYF	1	1.77167e-05	LB4130P	GBM.rec.PBMC	P9_CD4-CD8-_GZMK+
CASSSSGQLYQPQHF	1	1.77167e-05	LB4130P	GBM.rec.PBMC	P5_CD4+LTB+IL7R+
CASSSSHSGNTIYF	1	1.77167e-05	LB4130P	GBM.rec.PBMC	P5_CD4+LTB+IL7R+
CASSSSPGPPYEQYF	1	1.77167e-05	LB4130P	GBM.rec.PBMC	P5_CD4+LTB+IL7R+
CASSSSRPAGTQYF	1	1.77167e-05	LB4130P	GBM.rec.PBMC	P5_CD4+LTB+IL7R+
CASSSSTGGNEKLFF	1	1.77167e-05	LB4130P	GBM.rec.PBMC	P2_CD8+GZMK+
CASSSTGAATTGNTIYF	1	1.77167e-05	LB4130P	GBM.rec.PBMC	P8_CD8+Naive
CASSSTPSGELFF	1	1.77167e-05	LB4130P	GBM.rec.PBMC	P6_Treg
CASSSTSGGGLETQYF	1	1.77167e-05	LB4130P	GBM.rec.PBMC	P5_CD4+LTB+IL7R+
CASSSVGTGALGIYGYTF	1	1.77167e-05	LB4130P	GBM.rec.PBMC	P1_CD8+GZMB+GZMH+
CASSTDRGIEKLFF	1	1.77167e-05	LB4130P	GBM.rec.PBMC	P5_CD4+LTB+IL7R+
CASSTDRLGTEAFF	1	1.77167e-05	LB4130P	GBM.rec.PBMC	P5_CD4+LTB+IL7R+
CASSTGLAGAPGTQYF	1	1.77167e-05	LB4130P	GBM.rec.PBMC	P5_CD4+LTB+IL7R+
CASSTGTNYGYTF	1	1.77167e-05	LB4130P	GBM.rec.PBMC	P1_CD8+GZMB+GZMH+
CASSTGVIGFF	1	1.77167e-05	LB4130P	GBM.rec.PBMC	P5_CD4+LTB+IL7R+
CASSTLGTPQPQHF	1	1.77167e-05	LB4130P	GBM.rec.PBMC	P2_CD8+GZMK+
CASSTPGQFSGNTIYF	1	1.77167e-05	LB4130P	GBM.rec.PBMC	P2_CD8+GZMK+
CASSTSGGTGYGYTF	1	1.77167e-05	LB4130P	GBM.rec.PBMC	P5_CD4+LTB+IL7R+
CASSTSGQGYYGYTF	1	1.77167e-05	LB4130P	GBM.rec.PBMC	P5_CD4+LTB+IL7R+
CASSTSSGGLPYNEQFF	1	1.77167e-05	LB4130P	GBM.rec.PBMC	P2_CD8+GZMK+
CASSTTQRGQVFSPLHF	1	1.77167e-05	LB4130P	GBM.rec.PBMC	P1_CD8+GZMB+GZMH+
CASSVAGAGDYNEQFF	1	1.77167e-05	LB4130P	GBM.rec.PBMC	P5_CD4+LTB+IL7R+
CASSVAGAGGLTDTQYF	1	1.77167e-05	LB4130P	GBM.rec.PBMC	P5_CD4+LTB+IL7R+
CASSVAGKDTEAFF	1	1.77167e-05	LB4130P	GBM.rec.PBMC	P5_CD4+LTB+IL7R+
CASSVDGFPGELFF	1	1.77167e-05	LB4130P	GBM.rec.PBMC	P2_CD8+GZMK+
CASSVEAGTATEAFF	1	1.77167e-05	LB4130P	GBM.rec.PBMC	P9_CD4-CD8-_GZMK+
CASSVGGAHGELFF	1	1.77167e-05	LB4130P	GBM.rec.PBMC	P5_CD4+LTB+IL7R+
CASSVGGAPYNEQFF	1	1.77167e-05	LB4130P	GBM.rec.PBMC	P2_CD8+GZMK+
CASSVGGGGALYTGELFF	1	1.77167e-05	LB4130P	GBM.rec.PBMC	P8_CD8+Naive
CASSVGGGPHNEQFF	1	1.77167e-05	LB4130P	GBM.rec.PBMC	P5_CD4+LTB+IL7R+
CASSVGPWGTGNEQFF	1	1.77167e-05	LB4130P	GBM.rec.PBMC	P4_Proliferating
CASSVGSVTIYNEQFF	1	1.77167e-05	LB4130P	GBM.rec.PBMC	P5_CD4+LTB+IL7R+
CASSVIGIDEQFF	1	1.77167e-05	LB4130P	GBM.rec.PBMC	P7_CD4+Naive
CASSVLAGYADTQYF	1	1.77167e-05	LB4130P	GBM.rec.PBMC	P5_CD4+LTB+IL7R+
CASSVLGDGELFF	1	1.77167e-05	LB4130P	GBM.rec.PBMC	P5_CD4+LTB+IL7R+
CASSVNSGNAHEKLFF	1	1.77167e-05	LB4130P	GBM.rec.PBMC	P2_CD8+GZMK+
CASSVRETVPMNYGYTF	1	1.77167e-05	LB4130P	GBM.rec.PBMC	P5_CD4+LTB+IL7R+
CASSVRYADSYNEQFF	1	1.77167e-05	LB4130P	GBM.rec.PBMC	P9_CD4-CD8-_GZMK+
CASSVSEFTGELFF	1	1.77167e-05	LB4130P	GBM.rec.PBMC	P5_CD4+LTB+IL7R+
CASSVSGATEAFF	1	1.77167e-05	LB4130P	GBM.rec.PBMC	P2_CD8+GZMK+
CASSVTSFEQFF	1	1.77167e-05	LB4130P	GBM.rec.PBMC	P5_CD4+LTB+IL7R+
CASSVTVTTGELFF	1	1.77167e-05	LB4130P	GBM.rec.PBMC	P5_CD4+LTB+IL7R+
CASSWDRGSGYTF	1	1.77167e-05	LB4130P	GBM.rec.PBMC	P5_CD4+LTB+IL7R+
CASSWGSEEGYTF	1	1.77167e-05	LB4130P	GBM.rec.PBMC	P5_CD4+LTB+IL7R+
CASSWKGYPDTEAFF	1	1.77167e-05	LB4130P	GBM.rec.PBMC	P5_CD4+LTB+IL7R+
CASSWLAGGLDEQFF	1	1.77167e-05	LB4130P	GBM.rec.PBMC	P6_Treg
CASSWRVAQETQYF	1	1.77167e-05	LB4130P	GBM.rec.PBMC	P6_Treg
CASSWSGGESSYEQYF	1	1.77167e-05	LB4130P	GBM.rec.PBMC	P5_CD4+LTB+IL7R+
CASSWTGGGGDTF	1	1.77167e-05	LB4130P	GBM.rec.PBMC	P5_CD4+LTB+IL7R+
CASSWTGGLSSYEQYF	1	1.77167e-05	LB4130P	GBM.rec.PBMC	P5_CD4+LTB+IL7R+
CASSWTGSYEQYF	1	1.77167e-05	LB4130P	GBM.rec.PBMC	P5_CD4+LTB+IL7R+
CASSWTLSSYEQYF	1	1.77167e-05	LB4130P	GBM.rec.PBMC	P5_CD4+LTB+IL7R+
CASSWTQGLYEQYF	1	1.77167e-05	LB4130P	GBM.rec.PBMC	P2_CD8+GZMK+
CASSYASGGRNTEAFF	1	1.77167e-05	LB4130P	GBM.rec.PBMC	P6_Treg
CASSYDGQGPDEQYF	1	1.77167e-05	LB4130P	GBM.rec.PBMC	P2_CD8+GZMK+
CASSYDGVNLHHYEQYF	1	1.77167e-05	LB4130P	GBM.rec.PBMC	P1_CD8+GZMB+GZMH+
CASSYFGIKGFHEQYF	1	1.77167e-05	LB4130P	GBM.rec.PBMC	P1_CD8+GZMB+GZMH+
CASSYGGGNEQFF	1	1.77167e-05	LB4130P	GBM.rec.PBMC	P5_CD4+LTB+IL7R+
CASSYGVAGGTSTDTQYF	1	1.77167e-05	LB4130P	GBM.rec.PBMC	P5_CD4+LTB+IL7R+
CASSYLANTGELFF	1	1.77167e-05	LB4130P	GBM.rec.PBMC	P2_CD8+GZMK+
CASSYLEQPGNEQFF	1	1.77167e-05	LB4130P	GBM.rec.PBMC	P9_CD4-CD8-_GZMK+
CASSYLREEGYTF	1	1.77167e-05	LB4130P	GBM.rec.PBMC	P4_Proliferating
CASSYLRGFTDTQYF	1	1.77167e-05	LB4130P	GBM.rec.PBMC	P6_Treg
CASSYLRTEGTGELFF	1	1.77167e-05	LB4130P	GBM.rec.PBMC	P5_CD4+LTB+IL7R+
CASSYNEKLFF	1	1.77167e-05	LB4130P	GBM.rec.PBMC	P9_CD4-CD8-_GZMK+
CASSYPDSPAEAFF	1	1.77167e-05	LB4130P	GBM.rec.PBMC	P1_CD8+GZMB+GZMH+
CASSYPGSPTSGGDEGTDTQYF	1	1.77167e-05	LB4130P	GBM.rec.PBMC	P2_CD8+GZMK+
CASSYPWADGDNQPQHF	1	1.77167e-05	LB4130P	GBM.rec.PBMC	P8_CD8+Naive
CASSYQGHTDTQYF	1	1.77167e-05	LB4130P	GBM.rec.PBMC	P6_Treg
CASSYREYVTEAFF	1	1.77167e-05	LB4130P	GBM.rec.PBMC	P2_CD8+GZMK+
CASSYRGGQPQHF	1	1.77167e-05	LB4130P	GBM.rec.PBMC	P4_Proliferating
CASSYRGSTGELFF	1	1.77167e-05	LB4130P	GBM.rec.PBMC	P5_CD4+LTB+IL7R+
CASSYRNQGVRGYTF	1	1.77167e-05	LB4130P	GBM.rec.PBMC	P6_Treg
CASSYRNTEAFF	1	1.77167e-05	LB4130P	GBM.rec.PBMC	P1_CD8+GZMB+GZMH+
CASSYSAQGAGMNSPLHF	1	1.77167e-05	LB4130P	GBM.rec.PBMC	Platelet
CASSYSENNEQFF	1	1.77167e-05	LB4130P	GBM.rec.PBMC	P9_CD4-CD8-_GZMK+
CASSYSGASAYEQYF	1	1.77167e-05	LB4130P	GBM.rec.PBMC	P11_CD4-CD8-LTB+IL7R+
CASSYSGGLITEAFF	1	1.77167e-05	LB4130P	GBM.rec.PBMC	P5_CD4+LTB+IL7R+
CASSYSGVGTDTQYF	1	1.77167e-05	LB4130P	GBM.rec.PBMC	P5_CD4+LTB+IL7R+
CASSYSNGPPGQERHGYTF	1	1.77167e-05	LB4130P	GBM.rec.PBMC	P5_CD4+LTB+IL7R+
CASSYSNPPAFF	1	1.77167e-05	LB4130P	GBM.rec.PBMC	P5_CD4+LTB+IL7R+
CASSYSSGNQPQHF	1	1.77167e-05	LB4130P	GBM.rec.PBMC	P9_CD4-CD8-_GZMK+
CASSYSVVYTATNEKLFF	1	1.77167e-05	LB4130P	GBM.rec.PBMC	P5_CD4+LTB+IL7R+
CASSYTGQGEQYF	1	1.77167e-05	LB4130P	GBM.rec.PBMC	P5_CD4+LTB+IL7R+
CASSYTRGDRYGYTF	1	1.77167e-05	LB4130P	GBM.rec.PBMC	P5_CD4+LTB+IL7R+
CASSYVDTQYF	1	1.77167e-05	LB4130P	GBM.rec.PBMC	P5_CD4+LTB+IL7R+
CASSYWMGGTGELFF	1	1.77167e-05	LB4130P	GBM.rec.PBMC	P6_Treg
CASTGGTGGMGSEKLFF	1	1.77167e-05	LB4130P	GBM.rec.PBMC	P5_CD4+LTB+IL7R+
CASTGHPPNTGELFF	1	1.77167e-05	LB4130P	GBM.rec.PBMC	P1_CD8+GZMB+GZMH+
CASTIGGLRNEQFF	1	1.77167e-05	LB4130P	GBM.rec.PBMC	P2_CD8+GZMK+
CASTIGVGPYEQYF	1	1.77167e-05	LB4130P	GBM.rec.PBMC	P2_CD8+GZMK+
CASTITGVGTDTQYF	1	1.77167e-05	LB4130P	GBM.rec.PBMC	P5_CD4+LTB+IL7R+
CASTLGSTDTQYF	1	1.77167e-05	LB4130P	GBM.rec.PBMC	P6_Treg
CASTLSGAPGNTIYF	1	1.77167e-05	LB4130P	GBM.rec.PBMC	LowRead
CASTLSGNSPLHF	1	1.77167e-05	LB4130P	GBM.rec.PBMC	P5_CD4+LTB+IL7R+
CASTPGGNYNEQFF	1	1.77167e-05	LB4130P	GBM.rec.PBMC	P5_CD4+LTB+IL7R+
CASTPGQGRYGYTF	1	1.77167e-05	LB4130P	GBM.rec.PBMC	P5_CD4+LTB+IL7R+
CASTPRSGEYQETQYF	1	1.77167e-05	LB4130P	GBM.rec.PBMC	P5_CD4+LTB+IL7R+
CASTPSTGADTEAFF	1	1.77167e-05	LB4130P	GBM.rec.PBMC	P5_CD4+LTB+IL7R+
CASTPTTGGETQYF	1	1.77167e-05	LB4130P	GBM.rec.PBMC	P4_Proliferating
CASTPVGNTEAFF	1	1.77167e-05	LB4130P	GBM.rec.PBMC	P5_CD4+LTB+IL7R+
CASTQSEETQYF	1	1.77167e-05	LB4130P	GBM.rec.PBMC	P5_CD4+LTB+IL7R+
CASTRPAGELFF	1	1.77167e-05	LB4130P	GBM.rec.PBMC	P5_CD4+LTB+IL7R+
CASTRPASAGELFF	1	1.77167e-05	LB4130P	GBM.rec.PBMC	P5_CD4+LTB+IL7R+
CASTRTGMNTEAFF	1	1.77167e-05	LB4130P	GBM.rec.PBMC	LowRead
CASTSGGSPLHF	1	1.77167e-05	LB4130P	GBM.rec.PBMC	P8_CD8+Naive
CASTSSYNEQFF	1	1.77167e-05	LB4130P	GBM.rec.PBMC	P1_CD8+GZMB+GZMH+
CASTYTLGRLGEGYTF	1	1.77167e-05	LB4130P	GBM.rec.PBMC	P6_Treg
CASVISPSVYEQYF	1	1.77167e-05	LB4130P	GBM.rec.PBMC	P5_CD4+LTB+IL7R+
CASYGPVNSPLHF	1	1.77167e-05	LB4130P	GBM.rec.PBMC	P5_CD4+LTB+IL7R+
CATEPGRTMNTEAFF	1	1.77167e-05	LB4130P	GBM.rec.PBMC	P5_CD4+LTB+IL7R+
CATQRQGGSAGEQYF	1	1.77167e-05	LB4130P	GBM.rec.PBMC	LowRead
CATREWWGPGNRGTQYF	1	1.77167e-05	LB4130P	GBM.rec.PBMC	L/M doublet
CATRLAGGPYTDTQYF	1	1.77167e-05	LB4130P	GBM.rec.PBMC	P6_Treg
CATRTTGTGDYNEQFF	1	1.77167e-05	LB4130P	GBM.rec.PBMC	P5_CD4+LTB+IL7R+
CATSASAGGRGRPNEQFF	1	1.77167e-05	LB4130P	GBM.rec.PBMC	P5_CD4+LTB+IL7R+
CATSATSGGYADTQYF	1	1.77167e-05	LB4130P	GBM.rec.PBMC	P8_CD8+Naive
CATSDRPGPSNQTKLHEQFF	1	1.77167e-05	LB4130P	GBM.rec.PBMC	P5_CD4+LTB+IL7R+
CATSEEKQYF	1	1.77167e-05	LB4130P	GBM.rec.PBMC	P5_CD4+LTB+IL7R+
CATSLGESSGANVLTF	1	1.77167e-05	LB4130P	GBM.rec.PBMC	P5_CD4+LTB+IL7R+
CATSRDDTEINEKLFF	1	1.77167e-05	LB4130P	GBM.rec.PBMC	LowRead
CATSRGGSPGANVLTF	1	1.77167e-05	LB4130P	GBM.rec.PBMC	P5_CD4+LTB+IL7R+
CATSRGILGPQNTEAFF	1	1.77167e-05	LB4130P	GBM.rec.PBMC	P9_CD4-CD8-_GZMK+
CATSRGQNNSPLHF	1	1.77167e-05	LB4130P	GBM.rec.PBMC	P5_CD4+LTB+IL7R+
CATSRGVDRGPGNEQFF	1	1.77167e-05	LB4130P	GBM.rec.PBMC	P5_CD4+LTB+IL7R+
CATSRRWGTDTQYF	1	1.77167e-05	LB4130P	GBM.rec.PBMC	P2_CD8+GZMK+
CATSRSSPKDTQYF	1	1.77167e-05	LB4130P	GBM.rec.PBMC	P7_CD4+Naive
CATSRVGTGGNEQFF	1	1.77167e-05	LB4130P	GBM.rec.PBMC	P3_CTL
CATSRVSDATEAFF	1	1.77167e-05	LB4130P	GBM.rec.PBMC	P8_CD8+Naive
CATTSGGRTRHTDTQYF	1	1.77167e-05	LB4130P	GBM.rec.PBMC	P5_CD4+LTB+IL7R+
CATVMDGSYEQYF	1	1.77167e-05	LB4130P	GBM.rec.PBMC	P6_Treg
CAWIVPASSTEAFF	1	1.77167e-05	LB4130P	GBM.rec.PBMC	P2_CD8+GZMK+
CAWQLTGTFNEQFF	1	1.77167e-05	LB4130P	GBM.rec.PBMC	P2_CD8+GZMK+
CAWRPETVGGRTEAFF	1	1.77167e-05	LB4130P	GBM.rec.PBMC	P5_CD4+LTB+IL7R+
CAWRRSTGTAGGANVLTF	1	1.77167e-05	LB4130P	GBM.rec.PBMC	P5_CD4+LTB+IL7R+
CAWSARQGGSYGYTF	1	1.77167e-05	LB4130P	GBM.rec.PBMC	P5_CD4+LTB+IL7R+
CAWSIVPDTGELFF	1	1.77167e-05	LB4130P	GBM.rec.PBMC	P1_CD8+GZMB+GZMH+
CAWSPGQGTYNEQFF	1	1.77167e-05	LB4130P	GBM.rec.PBMC	P8_CD8+Naive
CAWSPGVSYQPQHF	1	1.77167e-05	LB4130P	GBM.rec.PBMC	P5_CD4+LTB+IL7R+
CAWSRGRYYGYTF	1	1.77167e-05	LB4130P	GBM.rec.PBMC	P5_CD4+LTB+IL7R+
CAWSVLGQSTDTQYF	1	1.77167e-05	LB4130P	GBM.rec.PBMC	P8_CD8+Naive
CAWTGDQNTEAFF	1	1.77167e-05	LB4130P	GBM.rec.PBMC	P6_Treg
CRALDTANYGYTF	1	1.77167e-05	LB4130P	GBM.rec.PBMC	Platelet
CRRFLGREQYF	1	1.77167e-05	LB4130P	GBM.rec.PBMC	P5_CD4+LTB+IL7R+
CRVPGQGNTEAFF	1	1.77167e-05	LB4130P	GBM.rec.PBMC	P5_CD4+LTB+IL7R+
CSAARGPYEQYF	1	1.77167e-05	LB4130P	GBM.rec.PBMC	P5_CD4+LTB+IL7R+
CSADGTYEQYF	1	1.77167e-05	LB4130P	GBM.rec.PBMC	P5_CD4+LTB+IL7R+
CSADPGGGTEAFF	1	1.77167e-05	LB4130P	GBM.rec.PBMC	P8_CD8+Naive
CSAEGNNTGELFF	1	1.77167e-05	LB4130P	GBM.rec.PBMC	P1_CD8+GZMB+GZMH+
CSAEWGAGNEQFF	1	1.77167e-05	LB4130P	GBM.rec.PBMC	P5_CD4+LTB+IL7R+
CSAGGGAFGYTF	1	1.77167e-05	LB4130P	GBM.rec.PBMC	P5_CD4+LTB+IL7R+
CSAGLPGQGAGEQYF	1	1.77167e-05	LB4130P	GBM.rec.PBMC	P11_CD4-CD8-LTB+IL7R+
CSAGMTSGGRGDTQYF	1	1.77167e-05	LB4130P	GBM.rec.PBMC	P5_CD4+LTB+IL7R+
CSAGQGRTEAFF	1	1.77167e-05	LB4130P	GBM.rec.PBMC	P5_CD4+LTB+IL7R+
CSAHEPGRPYEQYF	1	1.77167e-05	LB4130P	GBM.rec.PBMC	P6_Treg
CSAHSGTGENQPQHF	1	1.77167e-05	LB4130P	GBM.rec.PBMC	P5_CD4+LTB+IL7R+
CSAIEMNSYNEQFF	1	1.77167e-05	LB4130P	GBM.rec.PBMC	P1_CD8+GZMB+GZMH+
CSAKRLFGTGGSYEQYF	1	1.77167e-05	LB4130P	GBM.rec.PBMC	P1_CD8+GZMB+GZMH+
CSAKRTPGDSSYEQYF	1	1.77167e-05	LB4130P	GBM.rec.PBMC	P5_CD4+LTB+IL7R+
CSALDRDRVSKFF	1	1.77167e-05	LB4130P	GBM.rec.PBMC	P5_CD4+LTB+IL7R+
CSALSGDDRGQLETQYF	1	1.77167e-05	LB4130P	GBM.rec.PBMC	P5_CD4+LTB+IL7R+
CSANRVTNEKLFF	1	1.77167e-05	LB4130P	GBM.rec.PBMC	P5_CD4+LTB+IL7R+
CSAPKSGSLVYNEQFF	1	1.77167e-05	LB4130P	GBM.rec.PBMC	P5_CD4+LTB+IL7R+
CSAPLDGANVLTF	1	1.77167e-05	LB4130P	GBM.rec.PBMC	P5_CD4+LTB+IL7R+
CSAPSSEAGVYNEQFF	1	1.77167e-05	LB4130P	GBM.rec.PBMC	P5_CD4+LTB+IL7R+
CSAPTSGGNEQFF	1	1.77167e-05	LB4130P	GBM.rec.PBMC	P13_gdT
CSAPVMGVGYGYTF	1	1.77167e-05	LB4130P	GBM.rec.PBMC	P10_CD4+CD8+Naive
CSAQAGGILYEQYF	1	1.77167e-05	LB4130P	GBM.rec.PBMC	P5_CD4+LTB+IL7R+
CSAQDGSNYGYTF	1	1.77167e-05	LB4130P	GBM.rec.PBMC	P5_CD4+LTB+IL7R+
CSAQTEGHTQDTQYF	1	1.77167e-05	LB4130P	GBM.rec.PBMC	P8_CD8+Naive
CSARALGHDRKAFF	1	1.77167e-05	LB4130P	GBM.rec.PBMC	P5_CD4+LTB+IL7R+
CSARALRLSYEQYF	1	1.77167e-05	LB4130P	GBM.rec.PBMC	P5_CD4+LTB+IL7R+
CSARDAGSQFF	1	1.77167e-05	LB4130P	GBM.rec.PBMC	P6_Treg
CSARDATLYTEAFF	1	1.77167e-05	LB4130P	GBM.rec.PBMC	P6_Treg
CSARDFRGPGNTIYF	1	1.77167e-05	LB4130P	GBM.rec.PBMC	P5_CD4+LTB+IL7R+
CSARDFSGGGQGVPNYGYTF	1	1.77167e-05	LB4130P	GBM.rec.PBMC	P5_CD4+LTB+IL7R+
CSARDPGGSLNTGELFF	1	1.77167e-05	LB4130P	GBM.rec.PBMC	P1_CD8+GZMB+GZMH+
CSARDPGRGSTYEQYF	1	1.77167e-05	LB4130P	GBM.rec.PBMC	P5_CD4+LTB+IL7R+
CSARDREGPNYNEQFF	1	1.77167e-05	LB4130P	GBM.rec.PBMC	P2_CD8+GZMK+
CSARDRGGSSYEQYF	1	1.77167e-05	LB4130P	GBM.rec.PBMC	P8_CD8+Naive
CSARDRGRGQLSSNQPQHF	1	1.77167e-05	LB4130P	GBM.rec.PBMC	P5_CD4+LTB+IL7R+
CSARDWGARETQYF	1	1.77167e-05	LB4130P	GBM.rec.PBMC	P6_Treg
CSARESGGSYEQYF	1	1.77167e-05	LB4130P	GBM.rec.PBMC	P4_Proliferating
CSAREVGGRSYNEQFF	1	1.77167e-05	LB4130P	GBM.rec.PBMC	P5_CD4+LTB+IL7R+
CSARGDNYCYTF	1	1.77167e-05	LB4130P	GBM.rec.PBMC	P2_CD8+GZMK+
CSARGGKVDTQYF	1	1.77167e-05	LB4130P	GBM.rec.PBMC	P6_Treg
CSARGRQINNEQFF	1	1.77167e-05	LB4130P	GBM.rec.PBMC	P8_CD8+Naive
CSARGVGGTTSTDTQYF	1	1.77167e-05	LB4130P	GBM.rec.PBMC	P5_CD4+LTB+IL7R+
CSARKTRSPADTQYF	1	1.77167e-05	LB4130P	GBM.rec.PBMC	Platelet
CSARLDRGNEQFF	1	1.77167e-05	LB4130P	GBM.rec.PBMC	P1_CD8+GZMB+GZMH+
CSARLRAANTGELFF	1	1.77167e-05	LB4130P	GBM.rec.PBMC	P5_CD4+LTB+IL7R+
CSARMANLYGYTF	1	1.77167e-05	LB4130P	GBM.rec.PBMC	P5_CD4+LTB+IL7R+
CSARPLAGSADTQYF	1	1.77167e-05	LB4130P	GBM.rec.PBMC	P5_CD4+LTB+IL7R+
CSARPWMNTEAFF	1	1.77167e-05	LB4130P	GBM.rec.PBMC	P5_CD4+LTB+IL7R+
CSARRGATYTGELFF	1	1.77167e-05	LB4130P	GBM.rec.PBMC	P5_CD4+LTB+IL7R+
CSARSGTSGYEQYF	1	1.77167e-05	LB4130P	GBM.rec.PBMC	P9_CD4-CD8-_GZMK+
CSARTRTGGAETQYF	1	1.77167e-05	LB4130P	GBM.rec.PBMC	P5_CD4+LTB+IL7R+
CSARTSGETQYF	1	1.77167e-05	LB4130P	GBM.rec.PBMC	P5_CD4+LTB+IL7R+
CSARTTTGINEQFF	1	1.77167e-05	LB4130P	GBM.rec.PBMC	P5_CD4+LTB+IL7R+
CSARWQGAYEQYF	1	1.77167e-05	LB4130P	GBM.rec.PBMC	P6_Treg
CSASISRLAGVSF	1	1.77167e-05	LB4130P	GBM.rec.PBMC	Platelet
CSASPAGQGVGLNYGYTF	1	1.77167e-05	LB4130P	GBM.rec.PBMC	P5_CD4+LTB+IL7R+
CSASPQGMSNQPQHF	1	1.77167e-05	LB4130P	GBM.rec.PBMC	P5_CD4+LTB+IL7R+
CSASRGDLPEAFF	1	1.77167e-05	LB4130P	GBM.rec.PBMC	P5_CD4+LTB+IL7R+
CSASSTGASTDTQYF	1	1.77167e-05	LB4130P	GBM.rec.PBMC	P5_CD4+LTB+IL7R+
CSASTWDSTDTQYF	1	1.77167e-05	LB4130P	GBM.rec.PBMC	P2_CD8+GZMK+
CSASVIAGYNEQFF	1	1.77167e-05	LB4130P	GBM.rec.PBMC	P5_CD4+LTB+IL7R+
CSATGYPGSYGYTF	1	1.77167e-05	LB4130P	GBM.rec.PBMC	P2_CD8+GZMK+
CSAYTGPNYGYTF	1	1.77167e-05	LB4130P	GBM.rec.PBMC	P5_CD4+LTB+IL7R+
CSGRGTGDYGYTF	1	1.77167e-05	LB4130P	GBM.rec.PBMC	P5_CD4+LTB+IL7R+
CSSGDWNYGYTF	1	1.77167e-05	LB4130P	GBM.rec.PBMC	P6_Treg
CSTTGDYNEQFF	1	1.77167e-05	LB4130P	GBM.rec.PBMC	P5_CD4+LTB+IL7R+
CSVDPGNYGYTF	1	1.77167e-05	LB4130P	GBM.rec.PBMC	P2_CD8+GZMK+
CSVEAGTEAFF	1	1.77167e-05	LB4130P	GBM.rec.PBMC	P6_Treg
CSVEALPLEGFF	1	1.77167e-05	LB4130P	GBM.rec.PBMC	Platelet
CSVELTSDDTQYF	1	1.77167e-05	LB4130P	GBM.rec.PBMC	P9_CD4-CD8-_GZMK+
CSVEVTGFNEQYF	1	1.77167e-05	LB4130P	GBM.rec.PBMC	P2_CD8+GZMK+
CSVGRDRDSPLHF	1	1.77167e-05	LB4130P	GBM.rec.PBMC	P5_CD4+LTB+IL7R+
CSVGTGSGNTIYF	1	1.77167e-05	LB4130P	GBM.rec.PBMC	P6_Treg
CSVKTGYGYTF	1	1.77167e-05	LB4130P	GBM.rec.PBMC	P5_CD4+LTB+IL7R+
CSVRGSSYEQYF	1	1.77167e-05	LB4130P	GBM.rec.PBMC	P9_CD4-CD8-_GZMK+
CSVRLAGGSKPPTDTQYF	1	1.77167e-05	LB4130P	GBM.rec.PBMC	P2_CD8+GZMK+
CSVTENTEAFF	1	1.77167e-05	LB4130P	GBM.rec.PBMC	P7_CD4+Naive
CSVTSGGGPRGGGYIQYF	1	1.77167e-05	LB4130P	GBM.rec.PBMC	P7_CD4+Naive
CSVVFWDLKGDTEAFF	1	1.77167e-05	LB4130P	GBM.rec.PBMC	P5_CD4+LTB+IL7R+
SSASTQGATEAFF	1	1.77167e-05	LB4130P	GBM.rec.PBMC	P5_CD4+LTB+IL7R+
WAQGYGYTF	1	1.77167e-05	LB4130P	GBM.rec.PBMC	P5_CD4+LTB+IL7R+
CAANPPVAFF	1	1.77167e-05	LB4143P	GBM.rec.PBMC	P6_Treg
CAIETGDTYEQYF	1	1.77167e-05	LB4143P	GBM.rec.PBMC	P8_CD8+Naive
CAIQQAGNTIYF	1	1.77167e-05	LB4143P	GBM.rec.PBMC	P6_Treg
CAIRLSPGETQYF	1	1.77167e-05	LB4143P	GBM.rec.PBMC	P5_CD4+LTB+IL7R+
CAIRQLDTQYF	1	1.77167e-05	LB4143P	GBM.rec.PBMC	P5_CD4+LTB+IL7R+
CAIRSDRGGGRNNQPQHF	1	1.77167e-05	LB4143P	GBM.rec.PBMC	P5_CD4+LTB+IL7R+
CAISELGGDNNEQFF	1	1.77167e-05	LB4143P	GBM.rec.PBMC	P2_CD8+GZMK+
CAISELGGPNNEQFF	1	1.77167e-05	LB4143P	GBM.rec.PBMC	P2_CD8+GZMK+
CAISESYGTSGSDNEQFL	1	1.77167e-05	LB4143P	GBM.rec.PBMC	P1_CD8+GZMB+GZMH+
CAISESYGTSGSYNELLF	1	1.77167e-05	LB4143P	GBM.rec.PBMC	P1_CD8+GZMB+GZMH+
CAISESYGTSGSYNEQF	1	1.77167e-05	LB4143P	GBM.rec.PBMC	P13_gdT
CARRWDEGGTLKLSLDKAPVGWGNTEAFF	1	1.77167e-05	LB4143P	GBM.rec.PBMC	P8_CD8+Naive
CASAPWYF	1	1.77167e-05	LB4143P	GBM.rec.PBMC	P1_CD8+GZMB+GZMH+
CASARDRDPNEQFF	1	1.77167e-05	LB4143P	GBM.rec.PBMC	P7_CD4+Naive
CASGDGGALLDTQYF	1	1.77167e-05	LB4143P	GBM.rec.PBMC	P2_CD8+GZMK+
CASGETQYF	1	1.77167e-05	LB4143P	GBM.rec.PBMC	P1_CD8+GZMB+GZMH+
CASGFAYEQYF	1	1.77167e-05	LB4143P	GBM.rec.PBMC	P2_CD8+GZMK+
CASGGLAGKQYF	1	1.77167e-05	LB4143P	GBM.rec.PBMC	P5_CD4+LTB+IL7R+
CASGRGGLLNTEAFF	1	1.77167e-05	LB4143P	GBM.rec.PBMC	P6_Treg
CASIPLGGQETQYF	1	1.77167e-05	LB4143P	GBM.rec.PBMC	P5_CD4+LTB+IL7R+
CASKPPGGDRLAFFVYNEQFF	1	1.77167e-05	LB4143P	GBM.rec.PBMC	LowRead
CASKRWGGLTDTQYF	1	1.77167e-05	LB4143P	GBM.rec.PBMC	P5_CD4+LTB+IL7R+
CASKSRAESNQPQHF	1	1.77167e-05	LB4143P	GBM.rec.PBMC	P5_CD4+LTB+IL7R+
CASLESTGRSEQYF	1	1.77167e-05	LB4143P	GBM.rec.PBMC	P5_CD4+LTB+IL7R+
CASLKTGQPYEQYF	1	1.77167e-05	LB4143P	GBM.rec.PBMC	P5_CD4+LTB+IL7R+
CASPESTSGYNEQFF	1	1.77167e-05	LB4143P	GBM.rec.PBMC	P6_Treg
CASQRRDFFLGELFF	1	1.77167e-05	LB4143P	GBM.rec.PBMC	P1_CD8+GZMB+GZMH+
CASQTGESKETQYF	1	1.77167e-05	LB4143P	GBM.rec.PBMC	P2_CD8+GZMK+
CASQVGQASDNEQFF	1	1.77167e-05	LB4143P	GBM.rec.PBMC	P2_CD8+GZMK+
CASRADRLHEQYF	1	1.77167e-05	LB4143P	GBM.rec.PBMC	P8_CD8+Naive
CASRAKGPGAGYTF	1	1.77167e-05	LB4143P	GBM.rec.PBMC	Platelet
CASRATGGDEKLFF	1	1.77167e-05	LB4143P	GBM.rec.PBMC	P1_CD8+GZMB+GZMH+
CASRDPGGEQYF	1	1.77167e-05	LB4143P	GBM.rec.PBMC	P5_CD4+LTB+IL7R+
CASRDYSTRYQPQHF	1	1.77167e-05	LB4143P	GBM.rec.PBMC	P5_CD4+LTB+IL7R+
CASRETGIFHNEQFF	1	1.77167e-05	LB4143P	GBM.rec.PBMC	P5_CD4+LTB+IL7R+
CASRFEGGTLSYEQYF	1	1.77167e-05	LB4143P	GBM.rec.PBMC	P5_CD4+LTB+IL7R+
CASRGLAGGTDTQYF	1	1.77167e-05	LB4143P	GBM.rec.PBMC	P1_CD8+GZMB+GZMH+
CASRGQGRADTQYF	1	1.77167e-05	LB4143P	GBM.rec.PBMC	P4_Proliferating
CASRGQQETQYF	1	1.77167e-05	LB4143P	GBM.rec.PBMC	P6_Treg
CASRIGGEQYF	1	1.77167e-05	LB4143P	GBM.rec.PBMC	P5_CD4+LTB+IL7R+
CASRLAGVYNEQFF	1	1.77167e-05	LB4143P	GBM.rec.PBMC	P5_CD4+LTB+IL7R+
CASRLQAGNHEQYF	1	1.77167e-05	LB4143P	GBM.rec.PBMC	P5_CD4+LTB+IL7R+
CASRPAGTAYYEQYF	1	1.77167e-05	LB4143P	GBM.rec.PBMC	P5_CD4+LTB+IL7R+
CASRPGRQGGNSETQYF	1	1.77167e-05	LB4143P	GBM.rec.PBMC	P10_CD4+CD8+Naive
CASRPPGDYNEQFF	1	1.77167e-05	LB4143P	GBM.rec.PBMC	Platelet
CASRQQGLGRETQYF	1	1.77167e-05	LB4143P	GBM.rec.PBMC	P2_CD8+GZMK+
CASRRTRSRDPGETQYF	1	1.77167e-05	LB4143P	GBM.rec.PBMC	P2_CD8+GZMK+
CASRSGARYGYTF	1	1.77167e-05	LB4143P	GBM.rec.PBMC	P5_CD4+LTB+IL7R+
CASSADGWNYGYTF	1	1.77167e-05	LB4143P	GBM.rec.PBMC	P5_CD4+LTB+IL7R+
CASSAGTDHNEQFF	1	1.77167e-05	LB4143P	GBM.rec.PBMC	P11_CD4-CD8-LTB+IL7R+
CASSARTSLVRNEQFF	1	1.77167e-05	LB4143P	GBM.rec.PBMC	P2_CD8+GZMK+
CASSASDQRGETQYF	1	1.77167e-05	LB4143P	GBM.rec.PBMC	P5_CD4+LTB+IL7R+
CASSASLATDTQYF	1	1.77167e-05	LB4143P	GBM.rec.PBMC	P7_CD4+Naive
CASSAYRVRGPFEQFF	1	1.77167e-05	LB4143P	GBM.rec.PBMC	P2_CD8+GZMK+
CASSDEGLHTIYF	1	1.77167e-05	LB4143P	GBM.rec.PBMC	P9_CD4-CD8-_GZMK+
CASSDGGAYNEQFF	1	1.77167e-05	LB4143P	GBM.rec.PBMC	P8_CD8+Naive
CASSDGQGAWETQYF	1	1.77167e-05	LB4143P	GBM.rec.PBMC	P5_CD4+LTB+IL7R+
CASSDGVRTDTQYF	1	1.77167e-05	LB4143P	GBM.rec.PBMC	P5_CD4+LTB+IL7R+
CASSDNLRQVYNEQFF	1	1.77167e-05	LB4143P	GBM.rec.PBMC	P5_CD4+LTB+IL7R+
CASSDRGVETQYF	1	1.77167e-05	LB4143P	GBM.rec.PBMC	P8_CD8+Naive
CASSDSSDRGEKLFF	1	1.77167e-05	LB4143P	GBM.rec.PBMC	P5_CD4+LTB+IL7R+
CASSDTGGGAHYF	1	1.77167e-05	LB4143P	GBM.rec.PBMC	P6_Treg
CASSEALGEGFRQPQHF	1	1.77167e-05	LB4143P	GBM.rec.PBMC	P8_CD8+Naive
CASSEASQGGYEQYF	1	1.77167e-05	LB4143P	GBM.rec.PBMC	P5_CD4+LTB+IL7R+
CASSEAVSVGEQYF	1	1.77167e-05	LB4143P	GBM.rec.PBMC	P5_CD4+LTB+IL7R+
CASSEDRDRTEAFF	1	1.77167e-05	LB4143P	GBM.rec.PBMC	P5_CD4+LTB+IL7R+
CASSEGGLADFSYNEQFF	1	1.77167e-05	LB4143P	GBM.rec.PBMC	P5_CD4+LTB+IL7R+
CASSEGGNSNQPQHF	1	1.77167e-05	LB4143P	GBM.rec.PBMC	P5_CD4+LTB+IL7R+
CASSEGQGVDTQYF	1	1.77167e-05	LB4143P	GBM.rec.PBMC	P5_CD4+LTB+IL7R+
CASSEPPGQGFAGELFF	1	1.77167e-05	LB4143P	GBM.rec.PBMC	P5_CD4+LTB+IL7R+
CASSERPRSGNTIYF	1	1.77167e-05	LB4143P	GBM.rec.PBMC	P5_CD4+LTB+IL7R+
CASSEVSTSPDTQYF	1	1.77167e-05	LB4143P	GBM.rec.PBMC	Platelet
CASSFARGTAQETQYF	1	1.77167e-05	LB4143P	GBM.rec.PBMC	P2_CD8+GZMK+
CASSFDLDSRNEQFF	1	1.77167e-05	LB4143P	GBM.rec.PBMC	P9_CD4-CD8-_GZMK+
CASSFFQTGEKLFF	1	1.77167e-05	LB4143P	GBM.rec.PBMC	P2_CD8+GZMK+
CASSFGAGGSSEQFF	1	1.77167e-05	LB4143P	GBM.rec.PBMC	P5_CD4+LTB+IL7R+
CASSFGGAGANVLTF	1	1.77167e-05	LB4143P	GBM.rec.PBMC	P6_Treg
CASSFGGTGRLETQYF	1	1.77167e-05	LB4143P	GBM.rec.PBMC	Platelet
CASSFGLTRDTGELFF	1	1.77167e-05	LB4143P	GBM.rec.PBMC	P6_Treg
CASSFGRQGVEAFF	1	1.77167e-05	LB4143P	GBM.rec.PBMC	P5_CD4+LTB+IL7R+
CASSFGSGSGETQYF	1	1.77167e-05	LB4143P	GBM.rec.PBMC	P5_CD4+LTB+IL7R+
CASSFMGGLSSYNEQFF	1	1.77167e-05	LB4143P	GBM.rec.PBMC	P1_CD8+GZMB+GZMH+
CASSFPPGGSGAETQYF	1	1.77167e-05	LB4143P	GBM.rec.PBMC	P5_CD4+LTB+IL7R+
CASSFRGRTEAFF	1	1.77167e-05	LB4143P	GBM.rec.PBMC	P10_CD4+CD8+Naive
CASSFRTSQETQYF	1	1.77167e-05	LB4143P	GBM.rec.PBMC	P3_CTL
CASSFSGIVGYNEQFF	1	1.77167e-05	LB4143P	GBM.rec.PBMC	P6_Treg
CASSFSGTDTQYF	1	1.77167e-05	LB4143P	GBM.rec.PBMC	P5_CD4+LTB+IL7R+
CASSFVGQGLYEQYF	1	1.77167e-05	LB4143P	GBM.rec.PBMC	P5_CD4+LTB+IL7R+
CASSGDKNYGYTF	1	1.77167e-05	LB4143P	GBM.rec.PBMC	P5_CD4+LTB+IL7R+
CASSGGNSYEQYF	1	1.77167e-05	LB4143P	GBM.rec.PBMC	P8_CD8+Naive
CASSGIGVDEQFF	1	1.77167e-05	LB4143P	GBM.rec.PBMC	P1_CD8+GZMB+GZMH+
CASSGISAGNTIYF	1	1.77167e-05	LB4143P	GBM.rec.PBMC	P5_CD4+LTB+IL7R+
CASSGRTGPSLLLQPQHF	1	1.77167e-05	LB4143P	GBM.rec.PBMC	P2_CD8+GZMK+
CASSGTGTHYSYEQYF	1	1.77167e-05	LB4143P	GBM.rec.PBMC	P5_CD4+LTB+IL7R+
CASSGTSGSTDTQYF	1	1.77167e-05	LB4143P	GBM.rec.PBMC	P5_CD4+LTB+IL7R+
CASSHGTGDEKLFF	1	1.77167e-05	LB4143P	GBM.rec.PBMC	P8_CD8+Naive
CASSHPRDRLNTGELFF	1	1.77167e-05	LB4143P	GBM.rec.PBMC	P5_CD4+LTB+IL7R+
CASSHPTRTYNEQFF	1	1.77167e-05	LB4143P	GBM.rec.PBMC	P2_CD8+GZMK+
CASSHRYEQYF	1	1.77167e-05	LB4143P	GBM.rec.PBMC	P1_CD8+GZMB+GZMH+
CASSHWDRDNEQFF	1	1.77167e-05	LB4143P	GBM.rec.PBMC	P5_CD4+LTB+IL7R+
CASSIIVTDRGRNTEAFF	1	1.77167e-05	LB4143P	GBM.rec.PBMC	LowRead
CASSIKGGSPYEQYF	1	1.77167e-05	LB4143P	GBM.rec.PBMC	P5_CD4+LTB+IL7R+
CASSKGNEQFF	1	1.77167e-05	LB4143P	GBM.rec.PBMC	P9_CD4-CD8-_GZMK+
CASSKGSGGGSYNEQFF	1	1.77167e-05	LB4143P	GBM.rec.PBMC	P5_CD4+LTB+IL7R+
CASSKRTGGTGNTIYF	1	1.77167e-05	LB4143P	GBM.rec.PBMC	P9_CD4-CD8-_GZMK+
CASSLADPGVDSPLHF	1	1.77167e-05	LB4143P	GBM.rec.PBMC	P11_CD4-CD8-LTB+IL7R+
CASSLADRGGHEQYF	1	1.77167e-05	LB4143P	GBM.rec.PBMC	P2_CD8+GZMK+
CASSLAGSGSPLHF	1	1.77167e-05	LB4143P	GBM.rec.PBMC	LowRead
CASSLALGGGETGELFF	1	1.77167e-05	LB4143P	GBM.rec.PBMC	P5_CD4+LTB+IL7R+
CASSLALREVNEQFF	1	1.77167e-05	LB4143P	GBM.rec.PBMC	P8_CD8+Naive
CASSLASEQFF	1	1.77167e-05	LB4143P	GBM.rec.PBMC	P5_CD4+LTB+IL7R+
CASSLASGQETQYF	1	1.77167e-05	LB4143P	GBM.rec.PBMC	P3_CTL
CASSLDGRGGSNEQFF	1	1.77167e-05	LB4143P	GBM.rec.PBMC	P5_CD4+LTB+IL7R+
CASSLDPGPFFYGYTF	1	1.77167e-05	LB4143P	GBM.rec.PBMC	P8_CD8+Naive
CASSLDRGDEQYF	1	1.77167e-05	LB4143P	GBM.rec.PBMC	Platelet
CASSLESQRGSPRNEQFF	1	1.77167e-05	LB4143P	GBM.rec.PBMC	P5_CD4+LTB+IL7R+
CASSLGDRVEGYTF	1	1.77167e-05	LB4143P	GBM.rec.PBMC	P6_Treg
CASSLGDSINEKLFF	1	1.77167e-05	LB4143P	GBM.rec.PBMC	P5_CD4+LTB+IL7R+
CASSLGGGLSYNEQFF	1	1.77167e-05	LB4143P	GBM.rec.PBMC	P5_CD4+LTB+IL7R+
CASSLGGGSRTGELFF	1	1.77167e-05	LB4143P	GBM.rec.PBMC	P5_CD4+LTB+IL7R+
CASSLGGYSTDTQYF	1	1.77167e-05	LB4143P	GBM.rec.PBMC	P2_CD8+GZMK+
CASSLGHQGAWSPLHF	1	1.77167e-05	LB4143P	GBM.rec.PBMC	P5_CD4+LTB+IL7R+
CASSLGLANEQFF	1	1.77167e-05	LB4143P	GBM.rec.PBMC	P7_CD4+Naive
CASSLGPSGITDTQYF	1	1.77167e-05	LB4143P	GBM.rec.PBMC	P6_Treg
CASSLGQGFYNSPLHF	1	1.77167e-05	LB4143P	GBM.rec.PBMC	P5_CD4+LTB+IL7R+
CASSLGQGVYEQYF	1	1.77167e-05	LB4143P	GBM.rec.PBMC	P5_CD4+LTB+IL7R+
CASSLGRPDPQDEQFF	1	1.77167e-05	LB4143P	GBM.rec.PBMC	Platelet
CASSLGRTVRQETQYF	1	1.77167e-05	LB4143P	GBM.rec.PBMC	P10_CD4+CD8+Naive
CASSLGTGGRQPQHF	1	1.77167e-05	LB4143P	GBM.rec.PBMC	P8_CD8+Naive
CASSLGVEQYF	1	1.77167e-05	LB4143P	GBM.rec.PBMC	P9_CD4-CD8-_GZMK+
CASSLHRGTTLYGYTF	1	1.77167e-05	LB4143P	GBM.rec.PBMC	P3_CTL
CASSLLLVSVNTDTQYF	1	1.77167e-05	LB4143P	GBM.rec.PBMC	P5_CD4+LTB+IL7R+
CASSLLQSFSGANVLTF	1	1.77167e-05	LB4143P	GBM.rec.PBMC	P5_CD4+LTB+IL7R+
CASSLNGETQYF	1	1.77167e-05	LB4143P	GBM.rec.PBMC	LowRead
CASSLPGLEYAGELFF	1	1.77167e-05	LB4143P	GBM.rec.PBMC	P5_CD4+LTB+IL7R+
CASSLPGPSGAFF	1	1.77167e-05	LB4143P	GBM.rec.PBMC	P5_CD4+LTB+IL7R+
CASSLPGSEQFF	1	1.77167e-05	LB4143P	GBM.rec.PBMC	P7_CD4+Naive
CASSLPQGVITGELFF	1	1.77167e-05	LB4143P	GBM.rec.PBMC	P2_CD8+GZMK+
CASSLPTPGTSGSANTGELFF	1	1.77167e-05	LB4143P	GBM.rec.PBMC	P6_Treg
CASSLRDRATDTQYF	1	1.77167e-05	LB4143P	GBM.rec.PBMC	P5_CD4+LTB+IL7R+
CASSLRGQETQYF	1	1.77167e-05	LB4143P	GBM.rec.PBMC	P5_CD4+LTB+IL7R+
CASSLRLGVRSCRYGYTF	1	1.77167e-05	LB4143P	GBM.rec.PBMC	P5_CD4+LTB+IL7R+
CASSLSAFEQYF	1	1.77167e-05	LB4143P	GBM.rec.PBMC	P3_CTL
CASSLSGLAGDKNIQYF	1	1.77167e-05	LB4143P	GBM.rec.PBMC	P5_CD4+LTB+IL7R+
CASSLSGTGAYEQYF	1	1.77167e-05	LB4143P	GBM.rec.PBMC	P8_CD8+Naive
CASSLSSRDQPQHF	1	1.77167e-05	LB4143P	GBM.rec.PBMC	P5_CD4+LTB+IL7R+
CASSLTGGGTDTQYF	1	1.77167e-05	LB4143P	GBM.rec.PBMC	P11_CD4-CD8-LTB+IL7R+
CASSLTSGSLTQYF	1	1.77167e-05	LB4143P	GBM.rec.PBMC	P5_CD4+LTB+IL7R+
CASSLTTVTYEQYF	1	1.77167e-05	LB4143P	GBM.rec.PBMC	P7_CD4+Naive
CASSLVAGLAGREQYF	1	1.77167e-05	LB4143P	GBM.rec.PBMC	P2_CD8+GZMK+
CASSLVGELMNTEAFF	1	1.77167e-05	LB4143P	GBM.rec.PBMC	P8_CD8+Naive
CASSLVGLDGYTF	1	1.77167e-05	LB4143P	GBM.rec.PBMC	P5_CD4+LTB+IL7R+
CASSLVWTSGSRSYNEQFF	1	1.77167e-05	LB4143P	GBM.rec.PBMC	Platelet
CASSLWGSGSSYNEQFF	1	1.77167e-05	LB4143P	GBM.rec.PBMC	P2_CD8+GZMK+
CASSMPGQGNYGYTF	1	1.77167e-05	LB4143P	GBM.rec.PBMC	LowRead
CASSMVGDRTDTQYF	1	1.77167e-05	LB4143P	GBM.rec.PBMC	P10_CD4+CD8+Naive
CASSNRENEKLFF	1	1.77167e-05	LB4143P	GBM.rec.PBMC	P5_CD4+LTB+IL7R+
CASSPAGKGYEQYF	1	1.77167e-05	LB4143P	GBM.rec.PBMC	P5_CD4+LTB+IL7R+
CASSPDEKLFF	1	1.77167e-05	LB4143P	GBM.rec.PBMC	LowRead
CASSPELAGVTDTQYF	1	1.77167e-05	LB4143P	GBM.rec.PBMC	Platelet
CASSPGDEQYF	1	1.77167e-05	LB4143P	GBM.rec.PBMC	P2_CD8+GZMK+
CASSPGDRQYYGYTF	1	1.77167e-05	LB4143P	GBM.rec.PBMC	P5_CD4+LTB+IL7R+
CASSPGLGVNEQFF	1	1.77167e-05	LB4143P	GBM.rec.PBMC	P5_CD4+LTB+IL7R+
CASSPGQGQTPYNSPLHF	1	1.77167e-05	LB4143P	GBM.rec.PBMC	P5_CD4+LTB+IL7R+
CASSPGTGGFGANVLTF	1	1.77167e-05	LB4143P	GBM.rec.PBMC	P5_CD4+LTB+IL7R+
CASSPGTGLFNEQYF	1	1.77167e-05	LB4143P	GBM.rec.PBMC	P7_CD4+Naive
CASSPGTSGGIGELFF	1	1.77167e-05	LB4143P	GBM.rec.PBMC	Platelet
CASSPGTSGRGGETQYF	1	1.77167e-05	LB4143P	GBM.rec.PBMC	P5_CD4+LTB+IL7R+
CASSPGTSGYPAREQYF	1	1.77167e-05	LB4143P	GBM.rec.PBMC	P5_CD4+LTB+IL7R+
CASSPGVYEQYF	1	1.77167e-05	LB4143P	GBM.rec.PBMC	P6_Treg
CASSPHPRTGLVETQYF	1	1.77167e-05	LB4143P	GBM.rec.PBMC	P6_Treg
CASSPLAGGRQETQYF	1	1.77167e-05	LB4143P	GBM.rec.PBMC	P5_CD4+LTB+IL7R+
CASSPPDRDQETQYF	1	1.77167e-05	LB4143P	GBM.rec.PBMC	P10_CD4+CD8+Naive
CASSPPGTDTIYF	1	1.77167e-05	LB4143P	GBM.rec.PBMC	P8_CD8+Naive
CASSPPPSSGSNTGELFF	1	1.77167e-05	LB4143P	GBM.rec.PBMC	P6_Treg
CASSPPSGRTDTQYF	1	1.77167e-05	LB4143P	GBM.rec.PBMC	P10_CD4+CD8+Naive
CASSPPYRDRFSYEQYF	1	1.77167e-05	LB4143P	GBM.rec.PBMC	P5_CD4+LTB+IL7R+
CASSPPYTSGGTGELFF	1	1.77167e-05	LB4143P	GBM.rec.PBMC	P5_CD4+LTB+IL7R+
CASSPRDSTTDTQYF	1	1.77167e-05	LB4143P	GBM.rec.PBMC	P1_CD8+GZMB+GZMH+
CASSPRTGGDEKLFF	1	1.77167e-05	LB4143P	GBM.rec.PBMC	P5_CD4+LTB+IL7R+
CASSPRVGANVLTF	1	1.77167e-05	LB4143P	GBM.rec.PBMC	P5_CD4+LTB+IL7R+
CASSPSGSGRSYNEQFF	1	1.77167e-05	LB4143P	GBM.rec.PBMC	P11_CD4-CD8-LTB+IL7R+
CASSPTGTASYEQYF	1	1.77167e-05	LB4143P	GBM.rec.PBMC	P13_gdT
CASSPTLARAGNEQFF	1	1.77167e-05	LB4143P	GBM.rec.PBMC	P8_CD8+Naive
CASSPTSGRTDTQYF	1	1.77167e-05	LB4143P	GBM.rec.PBMC	P8_CD8+Naive
CASSQAARGNQETQYF	1	1.77167e-05	LB4143P	GBM.rec.PBMC	P4_Proliferating
CASSQADTQYF	1	1.77167e-05	LB4143P	GBM.rec.PBMC	P5_CD4+LTB+IL7R+
CASSQAGTGVNIQYF	1	1.77167e-05	LB4143P	GBM.rec.PBMC	P1_CD8+GZMB+GZMH+
CASSQDEDSFYAIYF	1	1.77167e-05	LB4143P	GBM.rec.PBMC	LowRead
CASSQDNKGGAEQYF	1	1.77167e-05	LB4143P	GBM.rec.PBMC	P11_CD4-CD8-LTB+IL7R+
CASSQDRDRGATDTQYF	1	1.77167e-05	LB4143P	GBM.rec.PBMC	P3_CTL
CASSQEGPSGLYF	1	1.77167e-05	LB4143P	GBM.rec.PBMC	P5_CD4+LTB+IL7R+
CASSQEGSRNHEQYF	1	1.77167e-05	LB4143P	GBM.rec.PBMC	P3_CTL
CASSQEQGRGGYTF	1	1.77167e-05	LB4143P	GBM.rec.PBMC	P11_CD4-CD8-LTB+IL7R+
CASSQEVVKANYGYTF	1	1.77167e-05	LB4143P	GBM.rec.PBMC	P5_CD4+LTB+IL7R+
CASSQGASYNEQFF	1	1.77167e-05	LB4143P	GBM.rec.PBMC	P2_CD8+GZMK+
CASSQGEDTQYF	1	1.77167e-05	LB4143P	GBM.rec.PBMC	P5_CD4+LTB+IL7R+
CASSQGFNQPQHF	1	1.77167e-05	LB4143P	GBM.rec.PBMC	P2_CD8+GZMK+
CASSQGITGSTGELFF	1	1.77167e-05	LB4143P	GBM.rec.PBMC	P5_CD4+LTB+IL7R+
CASSQGLAAYEQYF	1	1.77167e-05	LB4143P	GBM.rec.PBMC	P5_CD4+LTB+IL7R+
CASSQGLAGVRSYEQYF	1	1.77167e-05	LB4143P	GBM.rec.PBMC	P5_CD4+LTB+IL7R+
CASSQGPLEQFF	1	1.77167e-05	LB4143P	GBM.rec.PBMC	P5_CD4+LTB+IL7R+
CASSQGTTSGGDTQYF	1	1.77167e-05	LB4143P	GBM.rec.PBMC	L/M doublet
CASSQLMNTEAFF	1	1.77167e-05	LB4143P	GBM.rec.PBMC	P6_Treg
CASSQPTGRNTEAFF	1	1.77167e-05	LB4143P	GBM.rec.PBMC	P5_CD4+LTB+IL7R+
CASSQRTSGRNEQYF	1	1.77167e-05	LB4143P	GBM.rec.PBMC	P2_CD8+GZMK+
CASSQTATGDTQYF	1	1.77167e-05	LB4143P	GBM.rec.PBMC	P5_CD4+LTB+IL7R+
CASSQVGGRREQYF	1	1.77167e-05	LB4143P	GBM.rec.PBMC	P12_CD4-CD8-XCL1+XCL2+
CASSRDDGGYTF	1	1.77167e-05	LB4143P	GBM.rec.PBMC	P5_CD4+LTB+IL7R+
CASSRDRGLKFYEQYF	1	1.77167e-05	LB4143P	GBM.rec.PBMC	P2_CD8+GZMK+
CASSRGGAMKETQYF	1	1.77167e-05	LB4143P	GBM.rec.PBMC	P2_CD8+GZMK+
CASSRGLAARGYNEQFF	1	1.77167e-05	LB4143P	GBM.rec.PBMC	P5_CD4+LTB+IL7R+
CASSRIAGDQETQYF	1	1.77167e-05	LB4143P	GBM.rec.PBMC	P5_CD4+LTB+IL7R+
CASSRLQGNTEAFF	1	1.77167e-05	LB4143P	GBM.rec.PBMC	P10_CD4+CD8+Naive
CASSRRYSGNTIYF	1	1.77167e-05	LB4143P	GBM.rec.PBMC	P5_CD4+LTB+IL7R+
CASSRSGAGLSYEQYF	1	1.77167e-05	LB4143P	GBM.rec.PBMC	P5_CD4+LTB+IL7R+
CASSRTGVNTGELFF	1	1.77167e-05	LB4143P	GBM.rec.PBMC	P5_CD4+LTB+IL7R+
CASSSDGQPNQPQHF	1	1.77167e-05	LB4143P	GBM.rec.PBMC	P5_CD4+LTB+IL7R+
CASSSDRTPNEKLFF	1	1.77167e-05	LB4143P	GBM.rec.PBMC	P6_Treg
CASSSGQANYGYTF	1	1.77167e-05	LB4143P	GBM.rec.PBMC	P2_CD8+GZMK+
CASSSGTGFLGTDTQYF	1	1.77167e-05	LB4143P	GBM.rec.PBMC	P5_CD4+LTB+IL7R+
CASSSGVGSFF	1	1.77167e-05	LB4143P	GBM.rec.PBMC	P6_Treg
CASSSLGSTDTQYF	1	1.77167e-05	LB4143P	GBM.rec.PBMC	P5_CD4+LTB+IL7R+
CASSSPDEQYF	1	1.77167e-05	LB4143P	GBM.rec.PBMC	P1_CD8+GZMB+GZMH+
CASSSPETPSTDTQYF	1	1.77167e-05	LB4143P	GBM.rec.PBMC	P5_CD4+LTB+IL7R+
CASSSPGSNEQFF	1	1.77167e-05	LB4143P	GBM.rec.PBMC	P5_CD4+LTB+IL7R+
CASSSPSPRHTEAFF	1	1.77167e-05	LB4143P	GBM.rec.PBMC	P2_CD8+GZMK+
CASSSQGDTGELFF	1	1.77167e-05	LB4143P	GBM.rec.PBMC	P5_CD4+LTB+IL7R+
CASSSQPLSSYNEQFF	1	1.77167e-05	LB4143P	GBM.rec.PBMC	P5_CD4+LTB+IL7R+
CASSSQSGTANEKLFF	1	1.77167e-05	LB4143P	GBM.rec.PBMC	P2_CD8+GZMK+
CASSSRSGGGTDTQYF	1	1.77167e-05	LB4143P	GBM.rec.PBMC	P5_CD4+LTB+IL7R+
CASSSSSQGLLAKNIQYF	1	1.77167e-05	LB4143P	GBM.rec.PBMC	P5_CD4+LTB+IL7R+
CASSSTSGQYNEQFF	1	1.77167e-05	LB4143P	GBM.rec.PBMC	P5_CD4+LTB+IL7R+
CASSTGTSGELFF	1	1.77167e-05	LB4143P	GBM.rec.PBMC	P5_CD4+LTB+IL7R+
CASSTLAGLGNTIYF	1	1.77167e-05	LB4143P	GBM.rec.PBMC	P5_CD4+LTB+IL7R+
CASSTRLAGGLYQETQYF	1	1.77167e-05	LB4143P	GBM.rec.PBMC	P6_Treg
CASSVAGDRGDYGYTF	1	1.77167e-05	LB4143P	GBM.rec.PBMC	P5_CD4+LTB+IL7R+
CASSVAGEQFF	1	1.77167e-05	LB4143P	GBM.rec.PBMC	P11_CD4-CD8-LTB+IL7R+
CASSVASASYNEQFF	1	1.77167e-05	LB4143P	GBM.rec.PBMC	P5_CD4+LTB+IL7R+
CASSVAVGLREQYF	1	1.77167e-05	LB4143P	GBM.rec.PBMC	P2_CD8+GZMK+
CASSVDGGSYNEQFF	1	1.77167e-05	LB4143P	GBM.rec.PBMC	P2_CD8+GZMK+
CASSVEGTGASEQYF	1	1.77167e-05	LB4143P	GBM.rec.PBMC	P5_CD4+LTB+IL7R+
CASSVTGEYYNEQFF	1	1.77167e-05	LB4143P	GBM.rec.PBMC	P5_CD4+LTB+IL7R+
CASSVTGFYNEQFF	1	1.77167e-05	LB4143P	GBM.rec.PBMC	P6_Treg
CASSVTGQHNSPLHF	1	1.77167e-05	LB4143P	GBM.rec.PBMC	P5_CD4+LTB+IL7R+
CASSWGPGNTEAFF	1	1.77167e-05	LB4143P	GBM.rec.PBMC	P5_CD4+LTB+IL7R+
CASSWGQGATGELFF	1	1.77167e-05	LB4143P	GBM.rec.PBMC	LowRead
CASSYGGRAFEQFF	1	1.77167e-05	LB4143P	GBM.rec.PBMC	P5_CD4+LTB+IL7R+
CASSYGTSGQNEQFF	1	1.77167e-05	LB4143P	GBM.rec.PBMC	P2_CD8+GZMK+
CASSYNPRGQGASGYTF	1	1.77167e-05	LB4143P	GBM.rec.PBMC	P5_CD4+LTB+IL7R+
CASSYPGQGAEELFF	1	1.77167e-05	LB4143P	GBM.rec.PBMC	P13_gdT
CASSYSEEQPQHF	1	1.77167e-05	LB4143P	GBM.rec.PBMC	P6_Treg
CASSYSGNEQFF	1	1.77167e-05	LB4143P	GBM.rec.PBMC	P1_CD8+GZMB+GZMH+
CASSYSGTAQETQYF	1	1.77167e-05	LB4143P	GBM.rec.PBMC	P6_Treg
CASSYSRGPAVNYEQYF	1	1.77167e-05	LB4143P	GBM.rec.PBMC	P2_CD8+GZMK+
CASTHRENTEAFF	1	1.77167e-05	LB4143P	GBM.rec.PBMC	P11_CD4-CD8-LTB+IL7R+
CASTLPGDGYTF	1	1.77167e-05	LB4143P	GBM.rec.PBMC	P5_CD4+LTB+IL7R+
CASTYKEAYTF	1	1.77167e-05	LB4143P	GBM.rec.PBMC	P10_CD4+CD8+Naive
CASYNPGTSAYTDTQYF	1	1.77167e-05	LB4143P	GBM.rec.PBMC	P2_CD8+GZMK+
CATRDQWETQYF	1	1.77167e-05	LB4143P	GBM.rec.PBMC	P5_CD4+LTB+IL7R+
CATRTASGNTIYF	1	1.77167e-05	LB4143P	GBM.rec.PBMC	P6_Treg
CATSDPKDSGNYGYTF	1	1.77167e-05	LB4143P	GBM.rec.PBMC	LowRead
CATSRARTEYEQYF	1	1.77167e-05	LB4143P	GBM.rec.PBMC	P5_CD4+LTB+IL7R+
CATSRDLGGSYEQYF	1	1.77167e-05	LB4143P	GBM.rec.PBMC	P5_CD4+LTB+IL7R+
CATSRDSRTGQPQHF	1	1.77167e-05	LB4143P	GBM.rec.PBMC	P1_CD8+GZMB+GZMH+
CATSRELGRSAVVF	1	1.77167e-05	LB4143P	GBM.rec.PBMC	P10_CD4+CD8+Naive
CATSRVGGRTGELFF	1	1.77167e-05	LB4143P	GBM.rec.PBMC	P6_Treg
CATSSGGTALAKNIQYF	1	1.77167e-05	LB4143P	GBM.rec.PBMC	LowRead
CATSSVLTYEQYF	1	1.77167e-05	LB4143P	GBM.rec.PBMC	P5_CD4+LTB+IL7R+
CATTFNYGYTF	1	1.77167e-05	LB4143P	GBM.rec.PBMC	P5_CD4+LTB+IL7R+
CATTTGRSASKPLHF	1	1.77167e-05	LB4143P	GBM.rec.PBMC	P2_CD8+GZMK+
CAVAVGGGRDGYTF	1	1.77167e-05	LB4143P	GBM.rec.PBMC	P6_Treg
CAWSGLAGDYEQYF	1	1.77167e-05	LB4143P	GBM.rec.PBMC	P1_CD8+GZMB+GZMH+
CAWSGTSYETQYF	1	1.77167e-05	LB4143P	GBM.rec.PBMC	P1_CD8+GZMB+GZMH+
CAWSNQGWHGYTF	1	1.77167e-05	LB4143P	GBM.rec.PBMC	P5_CD4+LTB+IL7R+
CAWSSGGLSEQFF	1	1.77167e-05	LB4143P	GBM.rec.PBMC	P2_CD8+GZMK+
CAWSVRDSYTQYF	1	1.77167e-05	LB4143P	GBM.rec.PBMC	P5_CD4+LTB+IL7R+
CCSSGGGAGANVLTF	1	1.77167e-05	LB4143P	GBM.rec.PBMC	P5_CD4+LTB+IL7R+
CSAEDSAYTDTQYF	1	1.77167e-05	LB4143P	GBM.rec.PBMC	P5_CD4+LTB+IL7R+
CSAESARSYEQYF	1	1.77167e-05	LB4143P	GBM.rec.PBMC	P2_CD8+GZMK+
CSAEYRQVWSYEQYF	1	1.77167e-05	LB4143P	GBM.rec.PBMC	P5_CD4+LTB+IL7R+
CSAHLGLEGNEQFF	1	1.77167e-05	LB4143P	GBM.rec.PBMC	P5_CD4+LTB+IL7R+
CSAHPPAAFQETQYF	1	1.77167e-05	LB4143P	GBM.rec.PBMC	P6_Treg
CSAIQMNTEAFF	1	1.77167e-05	LB4143P	GBM.rec.PBMC	L/M doublet
CSAIRDSNSPLHF	1	1.77167e-05	LB4143P	GBM.rec.PBMC	P2_CD8+GZMK+
CSAKARSTDTQYF	1	1.77167e-05	LB4143P	GBM.rec.PBMC	LowRead
CSALDRSGEAFF	1	1.77167e-05	LB4143P	GBM.rec.PBMC	P5_CD4+LTB+IL7R+
CSAPGQGSGYTF	1	1.77167e-05	LB4143P	GBM.rec.PBMC	P11_CD4-CD8-LTB+IL7R+
CSARAQRDSYEQYF	1	1.77167e-05	LB4143P	GBM.rec.PBMC	P4_Proliferating
CSARDGTSASYEQYF	1	1.77167e-05	LB4143P	GBM.rec.PBMC	P5_CD4+LTB+IL7R+
CSARDLGGAQPQHF	1	1.77167e-05	LB4143P	GBM.rec.PBMC	P11_CD4-CD8-LTB+IL7R+
CSARDPGTGFREQYF	1	1.77167e-05	LB4143P	GBM.rec.PBMC	P6_Treg
CSAREEEATGGNEQFF	1	1.77167e-05	LB4143P	GBM.rec.PBMC	P5_CD4+LTB+IL7R+
CSAREEGKLAGVVTQYF	1	1.77167e-05	LB4143P	GBM.rec.PBMC	P1_CD8+GZMB+GZMH+
CSAREIFDNEQFF	1	1.77167e-05	LB4143P	GBM.rec.PBMC	P9_CD4-CD8-_GZMK+
CSARELAIGNEQFF	1	1.77167e-05	LB4143P	GBM.rec.PBMC	L/M doublet
CSARGGGYTEAFF	1	1.77167e-05	LB4143P	GBM.rec.PBMC	P2_CD8+GZMK+
CSARGGSGYTF	1	1.77167e-05	LB4143P	GBM.rec.PBMC	P5_CD4+LTB+IL7R+
CSARGTGTGL	1	1.77167e-05	LB4143P	GBM.rec.PBMC	P5_CD4+LTB+IL7R+
CSARPGAGNTIYF	1	1.77167e-05	LB4143P	GBM.rec.PBMC	P5_CD4+LTB+IL7R+
CSARPSGLAGMWDEQFF	1	1.77167e-05	LB4143P	GBM.rec.PBMC	P6_Treg
CSARQGAGEKLFF	1	1.77167e-05	LB4143P	GBM.rec.PBMC	P3_CTL
CSARTLDGYEQYF	1	1.77167e-05	LB4143P	GBM.rec.PBMC	P11_CD4-CD8-LTB+IL7R+
CSARTSGAYNEQFF	1	1.77167e-05	LB4143P	GBM.rec.PBMC	P5_CD4+LTB+IL7R+
CSARVPSGRWEQYF	1	1.77167e-05	LB4143P	GBM.rec.PBMC	P5_CD4+LTB+IL7R+
CSASEAGGPGEQFF	1	1.77167e-05	LB4143P	GBM.rec.PBMC	P11_CD4-CD8-LTB+IL7R+
CSASQAGYTGELFF	1	1.77167e-05	LB4143P	GBM.rec.PBMC	P6_Treg
CSASWENYGYTF	1	1.77167e-05	LB4143P	GBM.rec.PBMC	LowRead
CSATEGTAEETQYF	1	1.77167e-05	LB4143P	GBM.rec.PBMC	P11_CD4-CD8-LTB+IL7R+
CSATPVSGQEGETQYF	1	1.77167e-05	LB4143P	GBM.rec.PBMC	P5_CD4+LTB+IL7R+
CSAVTGTGRVGEQFF	1	1.77167e-05	LB4143P	GBM.rec.PBMC	P6_Treg
CSAWGGSSSYEQYF	1	1.77167e-05	LB4143P	GBM.rec.PBMC	LowRead
CSAWVNEQFF	1	1.77167e-05	LB4143P	GBM.rec.PBMC	P5_CD4+LTB+IL7R+
CSVEDRGARNGYTF	1	1.77167e-05	LB4143P	GBM.rec.PBMC	P5_CD4+LTB+IL7R+
CSVEIGANTDTQYF	1	1.77167e-05	LB4143P	GBM.rec.PBMC	P2_CD8+GZMK+
CSVLLAGSSYEQYF	1	1.77167e-05	LB4143P	GBM.rec.PBMC	LowRead
CSVPSPNYGYTF	1	1.77167e-05	LB4143P	GBM.rec.PBMC	P2_CD8+GZMK+
CSVQTGDSGYEQYF	1	1.77167e-05	LB4143P	GBM.rec.PBMC	P8_CD8+Naive
CSVRRGAGQPQHF	1	1.77167e-05	LB4143P	GBM.rec.PBMC	P5_CD4+LTB+IL7R+
CSVYQGREQYF	1	1.77167e-05	LB4143P	GBM.rec.PBMC	P5_CD4+LTB+IL7R+
CTYGQGNYGYTF	1	1.77167e-05	LB4143P	GBM.rec.PBMC	P5_CD4+LTB+IL7R+
SASGNGDSYEQYF	1	1.77167e-05	LB4143P	GBM.rec.PBMC	P11_CD4-CD8-LTB+IL7R+
CAGGGMGNQPQHF	1	1.77167e-05	LB4177P	GBM.rec.PBMC	P1_CD8+GZMB+GZMH+
CAGSLRGEGDTQYF	1	1.77167e-05	LB4177P	GBM.rec.PBMC	P5_CD4+LTB+IL7R+
CAHGARRPGTYKYIF	1	1.77167e-05	LB4177P	GBM.rec.PBMC	P2_CD8+GZMK+
CAIRDQETQYF	1	1.77167e-05	LB4177P	GBM.rec.PBMC	P5_CD4+LTB+IL7R+
CAISESGNTKETQYF	1	1.77167e-05	LB4177P	GBM.rec.PBMC	P8_CD8+Naive
CAISESGQRTEAFF	1	1.77167e-05	LB4177P	GBM.rec.PBMC	P5_CD4+LTB+IL7R+
CAISGREGTDTQYF	1	1.77167e-05	LB4177P	GBM.rec.PBMC	P2_CD8+GZMK+
CAISRLAGTTYEQYF	1	1.77167e-05	LB4177P	GBM.rec.PBMC	P2_CD8+GZMK+
CAISSLAAGETQYF	1	1.77167e-05	LB4177P	GBM.rec.PBMC	P5_CD4+LTB+IL7R+
CARLPRKHQETQYF	1	1.77167e-05	LB4177P	GBM.rec.PBMC	P5_CD4+LTB+IL7R+
CASAFGIGNQPQHF	1	1.77167e-05	LB4177P	GBM.rec.PBMC	P2_CD8+GZMK+
CASALDTDTQYF	1	1.77167e-05	LB4177P	GBM.rec.PBMC	P1_CD8+GZMB+GZMH+
CASAPLPSSYNEQFF	1	1.77167e-05	LB4177P	GBM.rec.PBMC	P10_CD4+CD8+Naive
CASARTEQETQYF	1	1.77167e-05	LB4177P	GBM.rec.PBMC	P5_CD4+LTB+IL7R+
CASASGRDEQFF	1	1.77167e-05	LB4177P	GBM.rec.PBMC	P2_CD8+GZMK+
CASCVGQMYGYTF	1	1.77167e-05	LB4177P	GBM.rec.PBMC	P5_CD4+LTB+IL7R+
CASEGTSGAYEQYF	1	1.77167e-05	LB4177P	GBM.rec.PBMC	P2_CD8+GZMK+
CASERSRGKETQYF	1	1.77167e-05	LB4177P	GBM.rec.PBMC	P5_CD4+LTB+IL7R+
CASETGDGGETQYF	1	1.77167e-05	LB4177P	GBM.rec.PBMC	P5_CD4+LTB+IL7R+
CASEVPNSYEQYF	1	1.77167e-05	LB4177P	GBM.rec.PBMC	P5_CD4+LTB+IL7R+
CASGGGYEQYF	1	1.77167e-05	LB4177P	GBM.rec.PBMC	P2_CD8+GZMK+
CASGLDRGLNTEAFF	1	1.77167e-05	LB4177P	GBM.rec.PBMC	P6_Treg
CASGLEIAGIGELFF	1	1.77167e-05	LB4177P	GBM.rec.PBMC	P11_CD4-CD8-LTB+IL7R+
CASGPRGPQHF	1	1.77167e-05	LB4177P	GBM.rec.PBMC	P3_CTL
CASGRPFQETQYF	1	1.77167e-05	LB4177P	GBM.rec.PBMC	P4_Proliferating
CASGSRDRGYTF	1	1.77167e-05	LB4177P	GBM.rec.PBMC	P5_CD4+LTB+IL7R+
CASGWGDRATEAFF	1	1.77167e-05	LB4177P	GBM.rec.PBMC	P5_CD4+LTB+IL7R+
CASGYRDSGRHF	1	1.77167e-05	LB4177P	GBM.rec.PBMC	P5_CD4+LTB+IL7R+
CASHRSGLSYEQYF	1	1.77167e-05	LB4177P	GBM.rec.PBMC	P5_CD4+LTB+IL7R+
CASIPTAGPYEQFF	1	1.77167e-05	LB4177P	GBM.rec.PBMC	P5_CD4+LTB+IL7R+
CASKGQGASSSYEQYF	1	1.77167e-05	LB4177P	GBM.rec.PBMC	L/M doublet
CASKGQGYTGELFF	1	1.77167e-05	LB4177P	GBM.rec.PBMC	P9_CD4-CD8-_GZMK+
CASKNTGAGANVLTF	1	1.77167e-05	LB4177P	GBM.rec.PBMC	P5_CD4+LTB+IL7R+
CASKPYPGLTNEQFF	1	1.77167e-05	LB4177P	GBM.rec.PBMC	P7_CD4+Naive
CASKSNSAHNEQFF	1	1.77167e-05	LB4177P	GBM.rec.PBMC	P5_CD4+LTB+IL7R+
CASKSTPSGGSGANVLTF	1	1.77167e-05	LB4177P	GBM.rec.PBMC	P7_CD4+Naive
CASLPPGLQETQYF	1	1.77167e-05	LB4177P	GBM.rec.PBMC	P6_Treg
CASLTNTEAFF	1	1.77167e-05	LB4177P	GBM.rec.PBMC	P5_CD4+LTB+IL7R+
CASNLGTGAYNEQFF	1	1.77167e-05	LB4177P	GBM.rec.PBMC	P5_CD4+LTB+IL7R+
CASNNRIPYYGYTF	1	1.77167e-05	LB4177P	GBM.rec.PBMC	P5_CD4+LTB+IL7R+
CASNPGTGGLKTQYF	1	1.77167e-05	LB4177P	GBM.rec.PBMC	P5_CD4+LTB+IL7R+
CASNQPTDSPTDTQYF	1	1.77167e-05	LB4177P	GBM.rec.PBMC	P11_CD4-CD8-LTB+IL7R+
CASNWKGAFF	1	1.77167e-05	LB4177P	GBM.rec.PBMC	P8_CD8+Naive
CASRAALSTDTQYF	1	1.77167e-05	LB4177P	GBM.rec.PBMC	P6_Treg
CASRAGTGALYGYTF	1	1.77167e-05	LB4177P	GBM.rec.PBMC	P5_CD4+LTB+IL7R+
CASRAGTLGGSGANVLTF	1	1.77167e-05	LB4177P	GBM.rec.PBMC	P5_CD4+LTB+IL7R+
CASRASGSGTGELFF	1	1.77167e-05	LB4177P	GBM.rec.PBMC	P5_CD4+LTB+IL7R+
CASRGSAGSNEQFF	1	1.77167e-05	LB4177P	GBM.rec.PBMC	P5_CD4+LTB+IL7R+
CASRGTGSYEQYF	1	1.77167e-05	LB4177P	GBM.rec.PBMC	L/M doublet
CASRGVGGGRTDTQYF	1	1.77167e-05	LB4177P	GBM.rec.PBMC	P5_CD4+LTB+IL7R+
CASRPGGGVYGYTF	1	1.77167e-05	LB4177P	GBM.rec.PBMC	P5_CD4+LTB+IL7R+
CASRPRPLDYEQYF	1	1.77167e-05	LB4177P	GBM.rec.PBMC	P4_Proliferating
CASRPSGVSTDTQYF	1	1.77167e-05	LB4177P	GBM.rec.PBMC	P5_CD4+LTB+IL7R+
CASRRQGAPYEQYF	1	1.77167e-05	LB4177P	GBM.rec.PBMC	P8_CD8+Naive
CASRRSGGAVTQYF	1	1.77167e-05	LB4177P	GBM.rec.PBMC	P5_CD4+LTB+IL7R+
CASRSGGTGDVYYF	1	1.77167e-05	LB4177P	GBM.rec.PBMC	P6_Treg
CASRTPGQLYEQYF	1	1.77167e-05	LB4177P	GBM.rec.PBMC	P8_CD8+Naive
CASSAEAGPLGETQYF	1	1.77167e-05	LB4177P	GBM.rec.PBMC	P7_CD4+Naive
CASSAGFEQFF	1	1.77167e-05	LB4177P	GBM.rec.PBMC	P3_CTL
CASSAGRSYEQYF	1	1.77167e-05	LB4177P	GBM.rec.PBMC	Platelet
CASSAGTSGGLSSYEQYF	1	1.77167e-05	LB4177P	GBM.rec.PBMC	P5_CD4+LTB+IL7R+
CASSALGSGTGELFF	1	1.77167e-05	LB4177P	GBM.rec.PBMC	P5_CD4+LTB+IL7R+
CASSALPLAGGPGTDTQYF	1	1.77167e-05	LB4177P	GBM.rec.PBMC	P5_CD4+LTB+IL7R+
CASSAPGATNEKLFF	1	1.77167e-05	LB4177P	GBM.rec.PBMC	P2_CD8+GZMK+
CASSAQPGPAPSRNGYTF	1	1.77167e-05	LB4177P	GBM.rec.PBMC	P5_CD4+LTB+IL7R+
CASSARTGLGGYTF	1	1.77167e-05	LB4177P	GBM.rec.PBMC	P5_CD4+LTB+IL7R+
CASSARTGNTEAFF	1	1.77167e-05	LB4177P	GBM.rec.PBMC	P5_CD4+LTB+IL7R+
CASSASQGYEQYF	1	1.77167e-05	LB4177P	GBM.rec.PBMC	P6_Treg
CASSASSYEQYF	1	1.77167e-05	LB4177P	GBM.rec.PBMC	P6_Treg
CASSATSSGANVLTF	1	1.77167e-05	LB4177P	GBM.rec.PBMC	P5_CD4+LTB+IL7R+
CASSDGDTDTQYF	1	1.77167e-05	LB4177P	GBM.rec.PBMC	P11_CD4-CD8-LTB+IL7R+
CASSDGLSGNNEQFF	1	1.77167e-05	LB4177P	GBM.rec.PBMC	P11_CD4-CD8-LTB+IL7R+
CASSDHRTGRETQYF	1	1.77167e-05	LB4177P	GBM.rec.PBMC	P7_CD4+Naive
CASSDPYQETQYF	1	1.77167e-05	LB4177P	GBM.rec.PBMC	P2_CD8+GZMK+
CASSDRDRRLAGTYEQYF	1	1.77167e-05	LB4177P	GBM.rec.PBMC	P7_CD4+Naive
CASSDRGQRGYTF	1	1.77167e-05	LB4177P	GBM.rec.PBMC	P3_CTL
CASSDRQNFNEKLFF	1	1.77167e-05	LB4177P	GBM.rec.PBMC	P6_Treg
CASSDRVVSGNYGYTF	1	1.77167e-05	LB4177P	GBM.rec.PBMC	P8_CD8+Naive
CASSDSSGGANEQFF	1	1.77167e-05	LB4177P	GBM.rec.PBMC	P11_CD4-CD8-LTB+IL7R+
CASSDTGTSGIAGELFF	1	1.77167e-05	LB4177P	GBM.rec.PBMC	P1_CD8+GZMB+GZMH+
CASSEAGRGELFF	1	1.77167e-05	LB4177P	GBM.rec.PBMC	P5_CD4+LTB+IL7R+
CASSEAPATPGAHFF	1	1.77167e-05	LB4177P	GBM.rec.PBMC	P5_CD4+LTB+IL7R+
CASSEARQILYNEQFF	1	1.77167e-05	LB4177P	GBM.rec.PBMC	P5_CD4+LTB+IL7R+
CASSEEVSDTQYF	1	1.77167e-05	LB4177P	GBM.rec.PBMC	P2_CD8+GZMK+
CASSEGASGANVLTF	1	1.77167e-05	LB4177P	GBM.rec.PBMC	P11_CD4-CD8-LTB+IL7R+
CASSEGYRGWDSPLHF	1	1.77167e-05	LB4177P	GBM.rec.PBMC	P5_CD4+LTB+IL7R+
CASSEKDRGAGNTIYF	1	1.77167e-05	LB4177P	GBM.rec.PBMC	P5_CD4+LTB+IL7R+
CASSERGGTDTQYF	1	1.77167e-05	LB4177P	GBM.rec.PBMC	P1_CD8+GZMB+GZMH+
CASSERLAGAYTDTQYF	1	1.77167e-05	LB4177P	GBM.rec.PBMC	P8_CD8+Naive
CASSETLPWRDRPSEQYF	1	1.77167e-05	LB4177P	GBM.rec.PBMC	P7_CD4+Naive
CASSETTDGNTGELFF	1	1.77167e-05	LB4177P	GBM.rec.PBMC	P2_CD8+GZMK+
CASSEVASGKYNEQFF	1	1.77167e-05	LB4177P	GBM.rec.PBMC	P5_CD4+LTB+IL7R+
CASSEYAETQYF	1	1.77167e-05	LB4177P	GBM.rec.PBMC	P6_Treg
CASSFDRQETQYF	1	1.77167e-05	LB4177P	GBM.rec.PBMC	P1_CD8+GZMB+GZMH+
CASSFEPARVLTSSYEQYF	1	1.77167e-05	LB4177P	GBM.rec.PBMC	P5_CD4+LTB+IL7R+
CASSFGDRVYEQYF	1	1.77167e-05	LB4177P	GBM.rec.PBMC	P8_CD8+Naive
CASSFGGGSYEQYF	1	1.77167e-05	LB4177P	GBM.rec.PBMC	P5_CD4+LTB+IL7R+
CASSFGHRPRGTPYEQYF	1	1.77167e-05	LB4177P	GBM.rec.PBMC	L/M doublet
CASSFGLGASGNTIYF	1	1.77167e-05	LB4177P	GBM.rec.PBMC	P1_CD8+GZMB+GZMH+
CASSFLAGGGRSDTQYF	1	1.77167e-05	LB4177P	GBM.rec.PBMC	P5_CD4+LTB+IL7R+
CASSFLDREYNEQFF	1	1.77167e-05	LB4177P	GBM.rec.PBMC	P2_CD8+GZMK+
CASSFLGDTDTGELFF	1	1.77167e-05	LB4177P	GBM.rec.PBMC	P1_CD8+GZMB+GZMH+
CASSFLGGRSSYEQYF	1	1.77167e-05	LB4177P	GBM.rec.PBMC	P2_CD8+GZMK+
CASSFMASSYNSPLHF	1	1.77167e-05	LB4177P	GBM.rec.PBMC	P5_CD4+LTB+IL7R+
CASSFQGAYEQYF	1	1.77167e-05	LB4177P	GBM.rec.PBMC	L/M doublet
CASSFRGLAGVLAAKNIQYF	1	1.77167e-05	LB4177P	GBM.rec.PBMC	P5_CD4+LTB+IL7R+
CASSFRGSNQPQHF	1	1.77167e-05	LB4177P	GBM.rec.PBMC	P11_CD4-CD8-LTB+IL7R+
CASSFSGEETQYF	1	1.77167e-05	LB4177P	GBM.rec.PBMC	P5_CD4+LTB+IL7R+
CASSFSGGGKGGYTF	1	1.77167e-05	LB4177P	GBM.rec.PBMC	P1_CD8+GZMB+GZMH+
CASSFSGGTGELFF	1	1.77167e-05	LB4177P	GBM.rec.PBMC	P5_CD4+LTB+IL7R+
CASSFVEGFGSYNEQFF	1	1.77167e-05	LB4177P	GBM.rec.PBMC	P2_CD8+GZMK+
CASSFYKGPTRNQPQHF	1	1.77167e-05	LB4177P	GBM.rec.PBMC	P5_CD4+LTB+IL7R+
CASSGGLAGDEQFF	1	1.77167e-05	LB4177P	GBM.rec.PBMC	P1_CD8+GZMB+GZMH+
CASSGGYEQFF	1	1.77167e-05	LB4177P	GBM.rec.PBMC	P5_CD4+LTB+IL7R+
CASSGLDSEKAYEQYF	1	1.77167e-05	LB4177P	GBM.rec.PBMC	P2_CD8+GZMK+
CASSGRNANTGELFF	1	1.77167e-05	LB4177P	GBM.rec.PBMC	P5_CD4+LTB+IL7R+
CASSGTGGGMGSNQPQHF	1	1.77167e-05	LB4177P	GBM.rec.PBMC	P7_CD4+Naive
CASSGTGVSPLHF	1	1.77167e-05	LB4177P	GBM.rec.PBMC	P5_CD4+LTB+IL7R+
CASSGTRGDEQYF	1	1.77167e-05	LB4177P	GBM.rec.PBMC	P6_Treg
CASSGWGGNEQFF	1	1.77167e-05	LB4177P	GBM.rec.PBMC	P5_CD4+LTB+IL7R+
CASSHGQAVGELFF	1	1.77167e-05	LB4177P	GBM.rec.PBMC	P5_CD4+LTB+IL7R+
CASSHGTSGINTDTQYF	1	1.77167e-05	LB4177P	GBM.rec.PBMC	L/M doublet
CASSHNMRTDRNTGELFF	1	1.77167e-05	LB4177P	GBM.rec.PBMC	P5_CD4+LTB+IL7R+
CASSHRSYGYTF	1	1.77167e-05	LB4177P	GBM.rec.PBMC	P2_CD8+GZMK+
CASSHVLSSGANVLTF	1	1.77167e-05	LB4177P	GBM.rec.PBMC	P2_CD8+GZMK+
CASSHWQRTQYF	1	1.77167e-05	LB4177P	GBM.rec.PBMC	P6_Treg
CASSIAGAPSYEQYF	1	1.77167e-05	LB4177P	GBM.rec.PBMC	P11_CD4-CD8-LTB+IL7R+
CASSIAGGGTGELFF	1	1.77167e-05	LB4177P	GBM.rec.PBMC	L/M doublet
CASSIGQGAPNEQYF	1	1.77167e-05	LB4177P	GBM.rec.PBMC	P2_CD8+GZMK+
CASSKNRDNTEAFF	1	1.77167e-05	LB4177P	GBM.rec.PBMC	P2_CD8+GZMK+
CASSKQESNSPLHF	1	1.77167e-05	LB4177P	GBM.rec.PBMC	P5_CD4+LTB+IL7R+
CASSKSRGDNYGYTF	1	1.77167e-05	LB4177P	GBM.rec.PBMC	P11_CD4-CD8-LTB+IL7R+
CASSLAAHEQFF	1	1.77167e-05	LB4177P	GBM.rec.PBMC	P2_CD8+GZMK+
CASSLAFQRGGTGELFF	1	1.77167e-05	LB4177P	GBM.rec.PBMC	Platelet
CASSLAPGATYGYTF	1	1.77167e-05	LB4177P	GBM.rec.PBMC	P8_CD8+Naive
CASSLAPSGLRGDYEQYF	1	1.77167e-05	LB4177P	GBM.rec.PBMC	P5_CD4+LTB+IL7R+
CASSLASTIAKNIQYF	1	1.77167e-05	LB4177P	GBM.rec.PBMC	P5_CD4+LTB+IL7R+
CASSLDAGQGKEKLFF	1	1.77167e-05	LB4177P	GBM.rec.PBMC	P5_CD4+LTB+IL7R+
CASSLDGGAVRNEQFF	1	1.77167e-05	LB4177P	GBM.rec.PBMC	P5_CD4+LTB+IL7R+
CASSLDPRETYEQYF	1	1.77167e-05	LB4177P	GBM.rec.PBMC	P2_CD8+GZMK+
CASSLDRAYNEQFF	1	1.77167e-05	LB4177P	GBM.rec.PBMC	P5_CD4+LTB+IL7R+
CASSLDRDKNIQYF	1	1.77167e-05	LB4177P	GBM.rec.PBMC	LowRead
CASSLDRDYEQYF	1	1.77167e-05	LB4177P	GBM.rec.PBMC	P2_CD8+GZMK+
CASSLDRTGELFF	1	1.77167e-05	LB4177P	GBM.rec.PBMC	P5_CD4+LTB+IL7R+
CASSLDRTGGNYGYTF	1	1.77167e-05	LB4177P	GBM.rec.PBMC	P2_CD8+GZMK+
CASSLEAGGKPQHF	1	1.77167e-05	LB4177P	GBM.rec.PBMC	P7_CD4+Naive
CASSLEEETQYF	1	1.77167e-05	LB4177P	GBM.rec.PBMC	P7_CD4+Naive
CASSLELKGGRTGELFF	1	1.77167e-05	LB4177P	GBM.rec.PBMC	P5_CD4+LTB+IL7R+
CASSLERTNYGYTF	1	1.77167e-05	LB4177P	GBM.rec.PBMC	P7_CD4+Naive
CASSLETSGNNEQFF	1	1.77167e-05	LB4177P	GBM.rec.PBMC	P5_CD4+LTB+IL7R+
CASSLFLTSGPYNEQFF	1	1.77167e-05	LB4177P	GBM.rec.PBMC	P5_CD4+LTB+IL7R+
CASSLFPRTSGTLKDEQFF	1	1.77167e-05	LB4177P	GBM.rec.PBMC	P2_CD8+GZMK+
CASSLGARGGPGELFF	1	1.77167e-05	LB4177P	GBM.rec.PBMC	P8_CD8+Naive
CASSLGAVSYEQYF	1	1.77167e-05	LB4177P	GBM.rec.PBMC	P2_CD8+GZMK+
CASSLGDTNTGELFF	1	1.77167e-05	LB4177P	GBM.rec.PBMC	P6_Treg
CASSLGGQPQHF	1	1.77167e-05	LB4177P	GBM.rec.PBMC	P7_CD4+Naive
CASSLGGVEETQYF	1	1.77167e-05	LB4177P	GBM.rec.PBMC	P5_CD4+LTB+IL7R+
CASSLGKRNTEAFF	1	1.77167e-05	LB4177P	GBM.rec.PBMC	P5_CD4+LTB+IL7R+
CASSLGPQYQPQHF	1	1.77167e-05	LB4177P	GBM.rec.PBMC	Platelet
CASSLGPVKDF	1	1.77167e-05	LB4177P	GBM.rec.PBMC	P8_CD8+Naive
CASSLGREAFF	1	1.77167e-05	LB4177P	GBM.rec.PBMC	P6_Treg
CASSLGRSSYNSPLHF	1	1.77167e-05	LB4177P	GBM.rec.PBMC	P5_CD4+LTB+IL7R+
CASSLGSNYGYTF	1	1.77167e-05	LB4177P	GBM.rec.PBMC	P5_CD4+LTB+IL7R+
CASSLGSSGVKFF	1	1.77167e-05	LB4177P	GBM.rec.PBMC	P5_CD4+LTB+IL7R+
CASSLGTGGYNEQFF	1	1.77167e-05	LB4177P	GBM.rec.PBMC	P2_CD8+GZMK+
CASSLGTNQPQHF	1	1.77167e-05	LB4177P	GBM.rec.PBMC	P3_CTL
CASSLGTQGSVYGYTF	1	1.77167e-05	LB4177P	GBM.rec.PBMC	P3_CTL
CASSLGTSGILRETQYF	1	1.77167e-05	LB4177P	GBM.rec.PBMC	P5_CD4+LTB+IL7R+
CASSLGTSGRANTQYF	1	1.77167e-05	LB4177P	GBM.rec.PBMC	P5_CD4+LTB+IL7R+
CASSLIGGAYNEQFF	1	1.77167e-05	LB4177P	GBM.rec.PBMC	P8_CD8+Naive
CASSLIGPPGGYTF	1	1.77167e-05	LB4177P	GBM.rec.PBMC	P5_CD4+LTB+IL7R+
CASSLIQRGGHEQFF	1	1.77167e-05	LB4177P	GBM.rec.PBMC	P5_CD4+LTB+IL7R+
CASSLKDSGYTF	1	1.77167e-05	LB4177P	GBM.rec.PBMC	P7_CD4+Naive
CASSLKNASASTDTQYF	1	1.77167e-05	LB4177P	GBM.rec.PBMC	P1_CD8+GZMB+GZMH+
CASSLKRTRGDRNGYTF	1	1.77167e-05	LB4177P	GBM.rec.PBMC	P4_Proliferating
CASSLLAGGLYEQYF	1	1.77167e-05	LB4177P	GBM.rec.PBMC	P7_CD4+Naive
CASSLLAGQTNEQYF	1	1.77167e-05	LB4177P	GBM.rec.PBMC	P8_CD8+Naive
CASSLLDYTEAFF	1	1.77167e-05	LB4177P	GBM.rec.PBMC	P5_CD4+LTB+IL7R+
CASSLLGGSTEAFF	1	1.77167e-05	LB4177P	GBM.rec.PBMC	P2_CD8+GZMK+
CASSLLSLAGVEGETQYF	1	1.77167e-05	LB4177P	GBM.rec.PBMC	P6_Treg
CASSLMGGQETQYF	1	1.77167e-05	LB4177P	GBM.rec.PBMC	P5_CD4+LTB+IL7R+
CASSLNGAGGGTEAFF	1	1.77167e-05	LB4177P	GBM.rec.PBMC	P8_CD8+Naive
CASSLNRVATKNIQYF	1	1.77167e-05	LB4177P	GBM.rec.PBMC	P1_CD8+GZMB+GZMH+
CASSLPGQGGETQYF	1	1.77167e-05	LB4177P	GBM.rec.PBMC	P5_CD4+LTB+IL7R+
CASSLPPGKGDYEQYF	1	1.77167e-05	LB4177P	GBM.rec.PBMC	P7_CD4+Naive
CASSLQGAMNTEAFF	1	1.77167e-05	LB4177P	GBM.rec.PBMC	P1_CD8+GZMB+GZMH+
CASSLQGPDTQYF	1	1.77167e-05	LB4177P	GBM.rec.PBMC	P5_CD4+LTB+IL7R+
CASSLQGRTSGRNNEQFF	1	1.77167e-05	LB4177P	GBM.rec.PBMC	P5_CD4+LTB+IL7R+
CASSLRANTDTQYF	1	1.77167e-05	LB4177P	GBM.rec.PBMC	Platelet
CASSLRGTEGMDGYTF	1	1.77167e-05	LB4177P	GBM.rec.PBMC	P5_CD4+LTB+IL7R+
CASSLSDSYNEQFF	1	1.77167e-05	LB4177P	GBM.rec.PBMC	P5_CD4+LTB+IL7R+
CASSLSGTASGNTIYF	1	1.77167e-05	LB4177P	GBM.rec.PBMC	P10_CD4+CD8+Naive
CASSLSPRQTYGYTF	1	1.77167e-05	LB4177P	GBM.rec.PBMC	P5_CD4+LTB+IL7R+
CASSLSREGLNEQFF	1	1.77167e-05	LB4177P	GBM.rec.PBMC	P2_CD8+GZMK+
CASSLSRRQETQYF	1	1.77167e-05	LB4177P	GBM.rec.PBMC	P6_Treg
CASSLTFSGGTTDTQYF	1	1.77167e-05	LB4177P	GBM.rec.PBMC	P11_CD4-CD8-LTB+IL7R+
CASSLTGGNQPQHF	1	1.77167e-05	LB4177P	GBM.rec.PBMC	P1_CD8+GZMB+GZMH+
CASSLTGSCFF	1	1.77167e-05	LB4177P	GBM.rec.PBMC	P11_CD4-CD8-LTB+IL7R+
CASSLTRTSGSMGEQYF	1	1.77167e-05	LB4177P	GBM.rec.PBMC	P5_CD4+LTB+IL7R+
CASSLVDRAQETQYF	1	1.77167e-05	LB4177P	GBM.rec.PBMC	P5_CD4+LTB+IL7R+
CASSLVKGTGYNEQFF	1	1.77167e-05	LB4177P	GBM.rec.PBMC	P2_CD8+GZMK+
CASSLVNTGELFF	1	1.77167e-05	LB4177P	GBM.rec.PBMC	P11_CD4-CD8-LTB+IL7R+
CASSLVPRDYTGELFF	1	1.77167e-05	LB4177P	GBM.rec.PBMC	P8_CD8+Naive
CASSLVQGPTNTEAFF	1	1.77167e-05	LB4177P	GBM.rec.PBMC	P5_CD4+LTB+IL7R+
CASSLVRQELGSPLHF	1	1.77167e-05	LB4177P	GBM.rec.PBMC	L/M doublet
CASSLVSRGGETQYF	1	1.77167e-05	LB4177P	GBM.rec.PBMC	P5_CD4+LTB+IL7R+
CASSLVTSGIRSSYEQYF	1	1.77167e-05	LB4177P	GBM.rec.PBMC	P5_CD4+LTB+IL7R+
CASSLWGGSYNEQFF	1	1.77167e-05	LB4177P	GBM.rec.PBMC	P7_CD4+Naive
CASSLWQGSTDTQYF	1	1.77167e-05	LB4177P	GBM.rec.PBMC	P5_CD4+LTB+IL7R+
CASSLWVQSSNQPQHF	1	1.77167e-05	LB4177P	GBM.rec.PBMC	P6_Treg
CASSLYQGLAGGIYNEQFF	1	1.77167e-05	LB4177P	GBM.rec.PBMC	P6_Treg
CASSNRGQGKETQYF	1	1.77167e-05	LB4177P	GBM.rec.PBMC	P7_CD4+Naive
CASSPDGLAGRYEQYF	1	1.77167e-05	LB4177P	GBM.rec.PBMC	P8_CD8+Naive
CASSPEGTLAGMEQYF	1	1.77167e-05	LB4177P	GBM.rec.PBMC	P5_CD4+LTB+IL7R+
CASSPFESNEKLFF	1	1.77167e-05	LB4177P	GBM.rec.PBMC	P6_Treg
CASSPGGPSNQPQHF	1	1.77167e-05	LB4177P	GBM.rec.PBMC	P2_CD8+GZMK+
CASSPGQQETQYF	1	1.77167e-05	LB4177P	GBM.rec.PBMC	P5_CD4+LTB+IL7R+
CASSPGRATNEKLFF	1	1.77167e-05	LB4177P	GBM.rec.PBMC	P2_CD8+GZMK+
CASSPGTRRVWDTQYF	1	1.77167e-05	LB4177P	GBM.rec.PBMC	P9_CD4-CD8-_GZMK+
CASSPGTSRRETQYF	1	1.77167e-05	LB4177P	GBM.rec.PBMC	P7_CD4+Naive
CASSPGWNEQFF	1	1.77167e-05	LB4177P	GBM.rec.PBMC	P8_CD8+Naive
CASSPKGEQFF	1	1.77167e-05	LB4177P	GBM.rec.PBMC	P6_Treg
CASSPNKDNGYTF	1	1.77167e-05	LB4177P	GBM.rec.PBMC	P5_CD4+LTB+IL7R+
CASSPPGGMNQPQHF	1	1.77167e-05	LB4177P	GBM.rec.PBMC	P6_Treg
CASSPQEVYEQYF	1	1.77167e-05	LB4177P	GBM.rec.PBMC	P2_CD8+GZMK+
CASSPQGQPQHF	1	1.77167e-05	LB4177P	GBM.rec.PBMC	P10_CD4+CD8+Naive
CASSPQVGPTNTEAFF	1	1.77167e-05	LB4177P	GBM.rec.PBMC	P2_CD8+GZMK+
CASSPRAGIQSWFF	1	1.77167e-05	LB4177P	GBM.rec.PBMC	P5_CD4+LTB+IL7R+
CASSPRDRAGQETQYF	1	1.77167e-05	LB4177P	GBM.rec.PBMC	P2_CD8+GZMK+
CASSPREGGTYNEQFF	1	1.77167e-05	LB4177P	GBM.rec.PBMC	P5_CD4+LTB+IL7R+
CASSPRGGRNNSPLHF	1	1.77167e-05	LB4177P	GBM.rec.PBMC	P5_CD4+LTB+IL7R+
CASSPRGPDTQYF	1	1.77167e-05	LB4177P	GBM.rec.PBMC	P5_CD4+LTB+IL7R+
CASSPRPFEAYMNTEAFF	1	1.77167e-05	LB4177P	GBM.rec.PBMC	P5_CD4+LTB+IL7R+
CASSPRSEIQETQYF	1	1.77167e-05	LB4177P	GBM.rec.PBMC	L/M doublet
CASSPRTYTEACF	1	1.77167e-05	LB4177P	GBM.rec.PBMC	LowRead
CASSPRVAGLRLNTEAFF	1	1.77167e-05	LB4177P	GBM.rec.PBMC	P5_CD4+LTB+IL7R+
CASSPSGRATDTQYF	1	1.77167e-05	LB4177P	GBM.rec.PBMC	P11_CD4-CD8-LTB+IL7R+
CASSPSTGGNTEAFF	1	1.77167e-05	LB4177P	GBM.rec.PBMC	P13_gdT
CASSPTFKVGETQYF	1	1.77167e-05	LB4177P	GBM.rec.PBMC	P2_CD8+GZMK+
CASSPTGLAGVNNEQFF	1	1.77167e-05	LB4177P	GBM.rec.PBMC	P8_CD8+Naive
CASSPTGVQPQHF	1	1.77167e-05	LB4177P	GBM.rec.PBMC	P5_CD4+LTB+IL7R+
CASSPTKKSPNSPLHF	1	1.77167e-05	LB4177P	GBM.rec.PBMC	P5_CD4+LTB+IL7R+
CASSPTRTGDGTDTQYF	1	1.77167e-05	LB4177P	GBM.rec.PBMC	P5_CD4+LTB+IL7R+
CASSPTVGTKGAGANVLTF	1	1.77167e-05	LB4177P	GBM.rec.PBMC	P11_CD4-CD8-LTB+IL7R+
CASSPTWGGGNQPQHF	1	1.77167e-05	LB4177P	GBM.rec.PBMC	P8_CD8+Naive
CASSPVARGQPQHF	1	1.77167e-05	LB4177P	GBM.rec.PBMC	P8_CD8+Naive
CASSPWARRLTYEQYF	1	1.77167e-05	LB4177P	GBM.rec.PBMC	P5_CD4+LTB+IL7R+
CASSPWGGANTGELFF	1	1.77167e-05	LB4177P	GBM.rec.PBMC	P10_CD4+CD8+Naive
CASSPWGGQYF	1	1.77167e-05	LB4177P	GBM.rec.PBMC	P5_CD4+LTB+IL7R+
CASSPYGRGFTDTQYF	1	1.77167e-05	LB4177P	GBM.rec.PBMC	P8_CD8+Naive
CASSQAGGSTDTQYF	1	1.77167e-05	LB4177P	GBM.rec.PBMC	P2_CD8+GZMK+
CASSQAIDRAANTIYF	1	1.77167e-05	LB4177P	GBM.rec.PBMC	P6_Treg
CASSQAYPPDTQYF	1	1.77167e-05	LB4177P	GBM.rec.PBMC	P6_Treg
CASSQDAGRTGLSGAKVLTF	1	1.77167e-05	LB4177P	GBM.rec.PBMC	P5_CD4+LTB+IL7R+
CASSQDFAPNEKLFF	1	1.77167e-05	LB4177P	GBM.rec.PBMC	P6_Treg
CASSQDFRELGYEQYF	1	1.77167e-05	LB4177P	GBM.rec.PBMC	P8_CD8+Naive
CASSQDLGTSGGSYYEQYF	1	1.77167e-05	LB4177P	GBM.rec.PBMC	P5_CD4+LTB+IL7R+
CASSQDSADLTYEQYF	1	1.77167e-05	LB4177P	GBM.rec.PBMC	P8_CD8+Naive
CASSQDSISYYEQYF	1	1.77167e-05	LB4177P	GBM.rec.PBMC	P5_CD4+LTB+IL7R+
CASSQDSTSGGFQQYF	1	1.77167e-05	LB4177P	GBM.rec.PBMC	P11_CD4-CD8-LTB+IL7R+
CASSQDVAGLARTDTQYF	1	1.77167e-05	LB4177P	GBM.rec.PBMC	P5_CD4+LTB+IL7R+
CASSQDWQGARYEQYF	1	1.77167e-05	LB4177P	GBM.rec.PBMC	P8_CD8+Naive
CASSQEMIGTSKRDGYTF	1	1.77167e-05	LB4177P	GBM.rec.PBMC	P1_CD8+GZMB+GZMH+
CASSQERGADKTYEQYF	1	1.77167e-05	LB4177P	GBM.rec.PBMC	P7_CD4+Naive
CASSQERLAGSTDTQYF	1	1.77167e-05	LB4177P	GBM.rec.PBMC	P10_CD4+CD8+Naive
CASSQESSGGASLEQYF	1	1.77167e-05	LB4177P	GBM.rec.PBMC	P11_CD4-CD8-LTB+IL7R+
CASSQEWGKEADTQYF	1	1.77167e-05	LB4177P	GBM.rec.PBMC	P11_CD4-CD8-LTB+IL7R+
CASSQGEQGLSGANVLTF	1	1.77167e-05	LB4177P	GBM.rec.PBMC	P11_CD4-CD8-LTB+IL7R+
CASSQGFLAGGRSQDTQYF	1	1.77167e-05	LB4177P	GBM.rec.PBMC	P5_CD4+LTB+IL7R+
CASSQGGAGGETQYF	1	1.77167e-05	LB4177P	GBM.rec.PBMC	L/M doublet
CASSQGGGFRSYNEQFF	1	1.77167e-05	LB4177P	GBM.rec.PBMC	P5_CD4+LTB+IL7R+
CASSQGLIGYSNQPQHF	1	1.77167e-05	LB4177P	GBM.rec.PBMC	P5_CD4+LTB+IL7R+
CASSQGPLDGDTQYF	1	1.77167e-05	LB4177P	GBM.rec.PBMC	P5_CD4+LTB+IL7R+
CASSQHGQGLDTQYF	1	1.77167e-05	LB4177P	GBM.rec.PBMC	P5_CD4+LTB+IL7R+
CASSQLEAGRAPFF	1	1.77167e-05	LB4177P	GBM.rec.PBMC	P5_CD4+LTB+IL7R+
CASSQQDHQPQHF	1	1.77167e-05	LB4177P	GBM.rec.PBMC	P2_CD8+GZMK+
CASSQRLYGYTF	1	1.77167e-05	LB4177P	GBM.rec.PBMC	P5_CD4+LTB+IL7R+
CASSQRTGGSPDTQYF	1	1.77167e-05	LB4177P	GBM.rec.PBMC	P5_CD4+LTB+IL7R+
CASSQSGLAIQYF	1	1.77167e-05	LB4177P	GBM.rec.PBMC	P6_Treg
CASSQTGGGSYEQYF	1	1.77167e-05	LB4177P	GBM.rec.PBMC	P5_CD4+LTB+IL7R+
CASSQTLLAGGDYEQYF	1	1.77167e-05	LB4177P	GBM.rec.PBMC	P2_CD8+GZMK+
CASSQVDLGFTLEKLFF	1	1.77167e-05	LB4177P	GBM.rec.PBMC	P5_CD4+LTB+IL7R+
CASSQVDMGLASAEQFF	1	1.77167e-05	LB4177P	GBM.rec.PBMC	P5_CD4+LTB+IL7R+
CASSQVGGGGSEQYF	1	1.77167e-05	LB4177P	GBM.rec.PBMC	P5_CD4+LTB+IL7R+
CASSQVPPPREPQHF	1	1.77167e-05	LB4177P	GBM.rec.PBMC	P2_CD8+GZMK+
CASSRAGGDTGELFF	1	1.77167e-05	LB4177P	GBM.rec.PBMC	P9_CD4-CD8-_GZMK+
CASSRDFGQPQHF	1	1.77167e-05	LB4177P	GBM.rec.PBMC	P1_CD8+GZMB+GZMH+
CASSRDRANEKLFF	1	1.77167e-05	LB4177P	GBM.rec.PBMC	P6_Treg
CASSRDRVGETQYF	1	1.77167e-05	LB4177P	GBM.rec.PBMC	P5_CD4+LTB+IL7R+
CASSRGAGGTDTQYF	1	1.77167e-05	LB4177P	GBM.rec.PBMC	P5_CD4+LTB+IL7R+
CASSRGGRSYNEQFF	1	1.77167e-05	LB4177P	GBM.rec.PBMC	P5_CD4+LTB+IL7R+
CASSRGQNHEQYF	1	1.77167e-05	LB4177P	GBM.rec.PBMC	P5_CD4+LTB+IL7R+
CASSRHGGTGETQYF	1	1.77167e-05	LB4177P	GBM.rec.PBMC	P5_CD4+LTB+IL7R+
CASSRKGQGFEETQYF	1	1.77167e-05	LB4177P	GBM.rec.PBMC	P5_CD4+LTB+IL7R+
CASSRLAGNNEQFF	1	1.77167e-05	LB4177P	GBM.rec.PBMC	P5_CD4+LTB+IL7R+
CASSRLGAGGGNEQFF	1	1.77167e-05	LB4177P	GBM.rec.PBMC	P5_CD4+LTB+IL7R+
CASSRMSGGARETQYF	1	1.77167e-05	LB4177P	GBM.rec.PBMC	P5_CD4+LTB+IL7R+
CASSRPVGGPDYEQYF	1	1.77167e-05	LB4177P	GBM.rec.PBMC	P5_CD4+LTB+IL7R+
CASSRQGGYEQYF	1	1.77167e-05	LB4177P	GBM.rec.PBMC	P5_CD4+LTB+IL7R+
CASSRQGITEAFF	1	1.77167e-05	LB4177P	GBM.rec.PBMC	P5_CD4+LTB+IL7R+
CASSRQGQGAGELFF	1	1.77167e-05	LB4177P	GBM.rec.PBMC	P6_Treg
CASSRQGQGYEQYF	1	1.77167e-05	LB4177P	GBM.rec.PBMC	P5_CD4+LTB+IL7R+
CASSRRGDDTGELFF	1	1.77167e-05	LB4177P	GBM.rec.PBMC	P5_CD4+LTB+IL7R+
CASSRRTGVSDTQYF	1	1.77167e-05	LB4177P	GBM.rec.PBMC	P2_CD8+GZMK+
CASSRTGLAYEQYF	1	1.77167e-05	LB4177P	GBM.rec.PBMC	P10_CD4+CD8+Naive
CASSRTLNEQFF	1	1.77167e-05	LB4177P	GBM.rec.PBMC	P8_CD8+Naive
CASSRTSGGRDYEQYF	1	1.77167e-05	LB4177P	GBM.rec.PBMC	P6_Treg
CASSRTSGWGDEQFF	1	1.77167e-05	LB4177P	GBM.rec.PBMC	P5_CD4+LTB+IL7R+
CASSRWTSSTDTQYF	1	1.77167e-05	LB4177P	GBM.rec.PBMC	P5_CD4+LTB+IL7R+
CASSSDTGQETQYF	1	1.77167e-05	LB4177P	GBM.rec.PBMC	P5_CD4+LTB+IL7R+
CASSSEQGAGETQYF	1	1.77167e-05	LB4177P	GBM.rec.PBMC	P5_CD4+LTB+IL7R+
CASSSGGASTDTQYF	1	1.77167e-05	LB4177P	GBM.rec.PBMC	P5_CD4+LTB+IL7R+
CASSSGLAGVLGELFF	1	1.77167e-05	LB4177P	GBM.rec.PBMC	P5_CD4+LTB+IL7R+
CASSSGLEGYIQYF	1	1.77167e-05	LB4177P	GBM.rec.PBMC	P2_CD8+GZMK+
CASSSGQTNQPQHF	1	1.77167e-05	LB4177P	GBM.rec.PBMC	P2_CD8+GZMK+
CASSSGRTNPTSSYEQYF	1	1.77167e-05	LB4177P	GBM.rec.PBMC	P5_CD4+LTB+IL7R+
CASSSLAGGRTGELFF	1	1.77167e-05	LB4177P	GBM.rec.PBMC	P6_Treg
CASSSLGTADEKLFF	1	1.77167e-05	LB4177P	GBM.rec.PBMC	P2_CD8+GZMK+
CASSSLRLAGGGGELFF	1	1.77167e-05	LB4177P	GBM.rec.PBMC	P5_CD4+LTB+IL7R+
CASSSMGREYSNQPQHF	1	1.77167e-05	LB4177P	GBM.rec.PBMC	P5_CD4+LTB+IL7R+
CASSSQQGSEQFF	1	1.77167e-05	LB4177P	GBM.rec.PBMC	P7_CD4+Naive
CASSSRDGRLGEQFF	1	1.77167e-05	LB4177P	GBM.rec.PBMC	P5_CD4+LTB+IL7R+
CASSSRDRGRTEAFF	1	1.77167e-05	LB4177P	GBM.rec.PBMC	P6_Treg
CASSSRLGVGEQYF	1	1.77167e-05	LB4177P	GBM.rec.PBMC	P2_CD8+GZMK+
CASSSRLSTQYF	1	1.77167e-05	LB4177P	GBM.rec.PBMC	P5_CD4+LTB+IL7R+
CASSSSILNTDTQYF	1	1.77167e-05	LB4177P	GBM.rec.PBMC	P3_CTL
CASSSSQGQGTQYF	1	1.77167e-05	LB4177P	GBM.rec.PBMC	P5_CD4+LTB+IL7R+
CASSSTFSRQETQYF	1	1.77167e-05	LB4177P	GBM.rec.PBMC	P2_CD8+GZMK+
CASSSVDRSYEQYF	1	1.77167e-05	LB4177P	GBM.rec.PBMC	P2_CD8+GZMK+
CASSSWASGRDTGELFF	1	1.77167e-05	LB4177P	GBM.rec.PBMC	P5_CD4+LTB+IL7R+
CASSSWTGTSYNEQFF	1	1.77167e-05	LB4177P	GBM.rec.PBMC	P6_Treg
CASSTDRAYEQYF	1	1.77167e-05	LB4177P	GBM.rec.PBMC	P8_CD8+Naive
CASSTGQGNYGYTF	1	1.77167e-05	LB4177P	GBM.rec.PBMC	P5_CD4+LTB+IL7R+
CASSTNYPTDTQYF	1	1.77167e-05	LB4177P	GBM.rec.PBMC	P10_CD4+CD8+Naive
CASSVDLRDWNTEAFF	1	1.77167e-05	LB4177P	GBM.rec.PBMC	P8_CD8+Naive
CASSVGGHEQFF	1	1.77167e-05	LB4177P	GBM.rec.PBMC	P5_CD4+LTB+IL7R+
CASSVGKDAYGYTF	1	1.77167e-05	LB4177P	GBM.rec.PBMC	P8_CD8+Naive
CASSVGQGSGNTIYF	1	1.77167e-05	LB4177P	GBM.rec.PBMC	P5_CD4+LTB+IL7R+
CASSVLDRGNTGELFF	1	1.77167e-05	LB4177P	GBM.rec.PBMC	P10_CD4+CD8+Naive
CASSVLGGLDEQYF	1	1.77167e-05	LB4177P	GBM.rec.PBMC	P1_CD8+GZMB+GZMH+
CASSVTGQGPMNTEAFF	1	1.77167e-05	LB4177P	GBM.rec.PBMC	P5_CD4+LTB+IL7R+
CASSVTGYTDTQYF	1	1.77167e-05	LB4177P	GBM.rec.PBMC	P5_CD4+LTB+IL7R+
CASSVTSEQETQYF	1	1.77167e-05	LB4177P	GBM.rec.PBMC	P2_CD8+GZMK+
CASSVVRNEKLFF	1	1.77167e-05	LB4177P	GBM.rec.PBMC	P5_CD4+LTB+IL7R+
CASSWDREYEQYF	1	1.77167e-05	LB4177P	GBM.rec.PBMC	P9_CD4-CD8-_GZMK+
CASSWEGRNEQFF	1	1.77167e-05	LB4177P	GBM.rec.PBMC	P3_CTL
CASSWNFQSRNPEAFF	1	1.77167e-05	LB4177P	GBM.rec.PBMC	P5_CD4+LTB+IL7R+
CASSWTGGQDQPQHF	1	1.77167e-05	LB4177P	GBM.rec.PBMC	P5_CD4+LTB+IL7R+
CASSWTKGATNEKLFF	1	1.77167e-05	LB4177P	GBM.rec.PBMC	P2_CD8+GZMK+
CASSYDGLDYGYTF	1	1.77167e-05	LB4177P	GBM.rec.PBMC	P5_CD4+LTB+IL7R+
CASSYEGDYSPLHF	1	1.77167e-05	LB4177P	GBM.rec.PBMC	P5_CD4+LTB+IL7R+
CASSYFGFGYEQYF	1	1.77167e-05	LB4177P	GBM.rec.PBMC	P1_CD8+GZMB+GZMH+
CASSYGNTEAFF	1	1.77167e-05	LB4177P	GBM.rec.PBMC	L/M doublet
CASSYGPNTEAFF	1	1.77167e-05	LB4177P	GBM.rec.PBMC	P2_CD8+GZMK+
CASSYGSASTDTQYF	1	1.77167e-05	LB4177P	GBM.rec.PBMC	P11_CD4-CD8-LTB+IL7R+
CASSYGVGNEQFF	1	1.77167e-05	LB4177P	GBM.rec.PBMC	P5_CD4+LTB+IL7R+
CASSYNWWDNNQPQHF	1	1.77167e-05	LB4177P	GBM.rec.PBMC	P5_CD4+LTB+IL7R+
CASSYPIGTPSTNEKLFF	1	1.77167e-05	LB4177P	GBM.rec.PBMC	P3_CTL
CASSYPWTSGRVTDTQYF	1	1.77167e-05	LB4177P	GBM.rec.PBMC	P2_CD8+GZMK+
CASSYQGLYEQYF	1	1.77167e-05	LB4177P	GBM.rec.PBMC	L/M doublet
CASSYQKYNEQFF	1	1.77167e-05	LB4177P	GBM.rec.PBMC	P5_CD4+LTB+IL7R+
CASSYQLQETQYF	1	1.77167e-05	LB4177P	GBM.rec.PBMC	P5_CD4+LTB+IL7R+
CASSYQTGASGNTIYF	1	1.77167e-05	LB4177P	GBM.rec.PBMC	P5_CD4+LTB+IL7R+
CASSYSADRPYEQYF	1	1.77167e-05	LB4177P	GBM.rec.PBMC	P11_CD4-CD8-LTB+IL7R+
CASSYSENQPQHF	1	1.77167e-05	LB4177P	GBM.rec.PBMC	P11_CD4-CD8-LTB+IL7R+
CASSYSGLAGIYNEQFF	1	1.77167e-05	LB4177P	GBM.rec.PBMC	P5_CD4+LTB+IL7R+
CASSYSIAGGWNGELFF	1	1.77167e-05	LB4177P	GBM.rec.PBMC	P5_CD4+LTB+IL7R+
CASSYSNTEAFF	1	1.77167e-05	LB4177P	GBM.rec.PBMC	L/M doublet
CASSYSRQFEGEKLFF	1	1.77167e-05	LB4177P	GBM.rec.PBMC	P5_CD4+LTB+IL7R+
CASSYSRTEQETQYF	1	1.77167e-05	LB4177P	GBM.rec.PBMC	P5_CD4+LTB+IL7R+
CASSYSTSSYEQYF	1	1.77167e-05	LB4177P	GBM.rec.PBMC	P11_CD4-CD8-LTB+IL7R+
CASSYTPSGGGGNEQFF	1	1.77167e-05	LB4177P	GBM.rec.PBMC	P5_CD4+LTB+IL7R+
CASTDLGGNQPQHF	1	1.77167e-05	LB4177P	GBM.rec.PBMC	P5_CD4+LTB+IL7R+
CASTEYGSETQYF	1	1.77167e-05	LB4177P	GBM.rec.PBMC	P5_CD4+LTB+IL7R+
CASTGGSLVEQYF	1	1.77167e-05	LB4177P	GBM.rec.PBMC	P5_CD4+LTB+IL7R+
CASTGQGSQPQHF	1	1.77167e-05	LB4177P	GBM.rec.PBMC	P5_CD4+LTB+IL7R+
CASTGRGREQFF	1	1.77167e-05	LB4177P	GBM.rec.PBMC	Platelet
CASTGRTTSPSTDTQYF	1	1.77167e-05	LB4177P	GBM.rec.PBMC	P5_CD4+LTB+IL7R+
CASTIRETQYF	1	1.77167e-05	LB4177P	GBM.rec.PBMC	P5_CD4+LTB+IL7R+
CASTLFRSSTGELFF	1	1.77167e-05	LB4177P	GBM.rec.PBMC	P5_CD4+LTB+IL7R+
CASTMGTVNTEAFF	1	1.77167e-05	LB4177P	GBM.rec.PBMC	P4_Proliferating
CASTMVEGTGELFF	1	1.77167e-05	LB4177P	GBM.rec.PBMC	P4_Proliferating
CASTQETGGYEQYF	1	1.77167e-05	LB4177P	GBM.rec.PBMC	P11_CD4-CD8-LTB+IL7R+
CASTSGGRDTGELFF	1	1.77167e-05	LB4177P	GBM.rec.PBMC	P8_CD8+Naive
CASTSPGQGILYGYTF	1	1.77167e-05	LB4177P	GBM.rec.PBMC	P6_Treg
CASTTGVTEAFF	1	1.77167e-05	LB4177P	GBM.rec.PBMC	P5_CD4+LTB+IL7R+
CASTYGLSYEQYF	1	1.77167e-05	LB4177P	GBM.rec.PBMC	P5_CD4+LTB+IL7R+
CATSRDGIGTGGSYEKYF	1	1.77167e-05	LB4177P	GBM.rec.PBMC	P7_CD4+Naive
CATSRDPRERSNQPQHF	1	1.77167e-05	LB4177P	GBM.rec.PBMC	P5_CD4+LTB+IL7R+
CATSRDRIETQYF	1	1.77167e-05	LB4177P	GBM.rec.PBMC	P2_CD8+GZMK+
CATSREQGDVSPLHF	1	1.77167e-05	LB4177P	GBM.rec.PBMC	P11_CD4-CD8-LTB+IL7R+
CATSRGDRGSYNEQFF	1	1.77167e-05	LB4177P	GBM.rec.PBMC	P2_CD8+GZMK+
CATSRGVAGDTEAFF	1	1.77167e-05	LB4177P	GBM.rec.PBMC	P5_CD4+LTB+IL7R+
CATSRRDLTQGWGEQFF	1	1.77167e-05	LB4177P	GBM.rec.PBMC	P2_CD8+GZMK+
CATSRVEGLASSYEQYF	1	1.77167e-05	LB4177P	GBM.rec.PBMC	P11_CD4-CD8-LTB+IL7R+
CATTGASYEQYF	1	1.77167e-05	LB4177P	GBM.rec.PBMC	P5_CD4+LTB+IL7R+
CATTTGGTGELFF	1	1.77167e-05	LB4177P	GBM.rec.PBMC	L/M doublet
CAWKWGPGGYTEAFF	1	1.77167e-05	LB4177P	GBM.rec.PBMC	P5_CD4+LTB+IL7R+
CAWRHKGLAGGDEQFF	1	1.77167e-05	LB4177P	GBM.rec.PBMC	P5_CD4+LTB+IL7R+
CAWRIEDSEQYF	1	1.77167e-05	LB4177P	GBM.rec.PBMC	P5_CD4+LTB+IL7R+
CAWRSAGANVLTF	1	1.77167e-05	LB4177P	GBM.rec.PBMC	P5_CD4+LTB+IL7R+
CAWSDPYEQYF	1	1.77167e-05	LB4177P	GBM.rec.PBMC	P8_CD8+Naive
CAWSGTATNEKLFF	1	1.77167e-05	LB4177P	GBM.rec.PBMC	P5_CD4+LTB+IL7R+
CAWSVGGSNNSPLHF	1	1.77167e-05	LB4177P	GBM.rec.PBMC	P6_Treg
CAWSVLAGGPNEQFF	1	1.77167e-05	LB4177P	GBM.rec.PBMC	P11_CD4-CD8-LTB+IL7R+
CAWSVQGANIQYF	1	1.77167e-05	LB4177P	GBM.rec.PBMC	P5_CD4+LTB+IL7R+
CSADRGTEAFF	1	1.77167e-05	LB4177P	GBM.rec.PBMC	P6_Treg
CSAERRTSGRWNEQFF	1	1.77167e-05	LB4177P	GBM.rec.PBMC	LowRead
CSAGGGEASSYNEQFF	1	1.77167e-05	LB4177P	GBM.rec.PBMC	P5_CD4+LTB+IL7R+
CSAGGQGGKTEAFF	1	1.77167e-05	LB4177P	GBM.rec.PBMC	P5_CD4+LTB+IL7R+
CSAGSGQGKNEQFF	1	1.77167e-05	LB4177P	GBM.rec.PBMC	P5_CD4+LTB+IL7R+
CSAGTAQYF	1	1.77167e-05	LB4177P	GBM.rec.PBMC	P5_CD4+LTB+IL7R+
CSAIQTNYGYTF	1	1.77167e-05	LB4177P	GBM.rec.PBMC	P5_CD4+LTB+IL7R+
CSAKPSGQVNTGELFF	1	1.77167e-05	LB4177P	GBM.rec.PBMC	L/M doublet
CSALRRGGNNEQFF	1	1.77167e-05	LB4177P	GBM.rec.PBMC	P5_CD4+LTB+IL7R+
CSALRTSGGRETQYF	1	1.77167e-05	LB4177P	GBM.rec.PBMC	P8_CD8+Naive
CSAPGNTDTQYF	1	1.77167e-05	LB4177P	GBM.rec.PBMC	P5_CD4+LTB+IL7R+
CSARARTSTDTQYF	1	1.77167e-05	LB4177P	GBM.rec.PBMC	P6_Treg
CSARASGANVLTF	1	1.77167e-05	LB4177P	GBM.rec.PBMC	P5_CD4+LTB+IL7R+
CSARDMGTRTSGTYEQYF	1	1.77167e-05	LB4177P	GBM.rec.PBMC	P2_CD8+GZMK+
CSARDPQGPNSPLHF	1	1.77167e-05	LB4177P	GBM.rec.PBMC	P5_CD4+LTB+IL7R+
CSARDRGSGRIGELFF	1	1.77167e-05	LB4177P	GBM.rec.PBMC	Platelet
CSARDRPSSYEQYF	1	1.77167e-05	LB4177P	GBM.rec.PBMC	P5_CD4+LTB+IL7R+
CSARDSEGKNSFGYTF	1	1.77167e-05	LB4177P	GBM.rec.PBMC	P10_CD4+CD8+Naive
CSARDTGDITDTQYF	1	1.77167e-05	LB4177P	GBM.rec.PBMC	P1_CD8+GZMB+GZMH+
CSARGSSNQPQHF	1	1.77167e-05	LB4177P	GBM.rec.PBMC	P6_Treg
CSARLAGGPYNEQFF	1	1.77167e-05	LB4177P	GBM.rec.PBMC	P6_Treg
CSARPGSGVTEAFF	1	1.77167e-05	LB4177P	GBM.rec.PBMC	L/M doublet
CSARRGEPYEQYF	1	1.77167e-05	LB4177P	GBM.rec.PBMC	P13_gdT
CSARRGLAGQGEQYF	1	1.77167e-05	LB4177P	GBM.rec.PBMC	P5_CD4+LTB+IL7R+
CSARTGTGSEQYF	1	1.77167e-05	LB4177P	GBM.rec.PBMC	P8_CD8+Naive
CSARVHRGLGANVLTF	1	1.77167e-05	LB4177P	GBM.rec.PBMC	P6_Treg
CSASDATGIKNIQYF	1	1.77167e-05	LB4177P	GBM.rec.PBMC	P2_CD8+GZMK+
CSASGLAGGLSYEQYF	1	1.77167e-05	LB4177P	GBM.rec.PBMC	P6_Treg
CSASIRGTYEQYF	1	1.77167e-05	LB4177P	GBM.rec.PBMC	P6_Treg
CSASQSAVYAQYF	1	1.77167e-05	LB4177P	GBM.rec.PBMC	P5_CD4+LTB+IL7R+
CSASRSGGNSNQPQHF	1	1.77167e-05	LB4177P	GBM.rec.PBMC	P5_CD4+LTB+IL7R+
CSASVGSTEAFF	1	1.77167e-05	LB4177P	GBM.rec.PBMC	P5_CD4+LTB+IL7R+
CSATGGADTQYF	1	1.77167e-05	LB4177P	GBM.rec.PBMC	P6_Treg
CSATHEGMNTEAFF	1	1.77167e-05	LB4177P	GBM.rec.PBMC	P5_CD4+LTB+IL7R+
CSATLDRDTEAFF	1	1.77167e-05	LB4177P	GBM.rec.PBMC	P11_CD4-CD8-LTB+IL7R+
CSGERQANSPLHF	1	1.77167e-05	LB4177P	GBM.rec.PBMC	P5_CD4+LTB+IL7R+
CSGLTNTEAFF	1	1.77167e-05	LB4177P	GBM.rec.PBMC	P2_CD8+GZMK+
CSGRDGLNYGYTF	1	1.77167e-05	LB4177P	GBM.rec.PBMC	P1_CD8+GZMB+GZMH+
CSVDREGMNTEAFF	1	1.77167e-05	LB4177P	GBM.rec.PBMC	P8_CD8+Naive
CSVITGGGETQYF	1	1.77167e-05	LB4177P	GBM.rec.PBMC	P5_CD4+LTB+IL7R+
CSVRFGVQETQYF	1	1.77167e-05	LB4177P	GBM.rec.PBMC	P10_CD4+CD8+Naive
CSVRTSGSTDTQYF	1	1.77167e-05	LB4177P	GBM.rec.PBMC	P5_CD4+LTB+IL7R+
CSVVRGSSNYGYTF	1	1.77167e-05	LB4177P	GBM.rec.PBMC	P5_CD4+LTB+IL7R+
CSVWVSYEQYF	1	1.77167e-05	LB4177P	GBM.rec.PBMC	P5_CD4+LTB+IL7R+
CASSLGSTEAFF	5	8.85834e-05	LB4025P	GBM.pembro.PBMC	P1_CD8+GZMB+GZMH+,L/M doublet,P2_CD8+GZMK+
CASSLGSYEQYF	4	7.08667e-05	LB3667P	GBM.pembro.PBMC	P2_CD8+GZMK+
CASSALSGPYTQYF	3	5.315e-05	LB4006P	GBM.pembro.PBMC	P1_CD8+GZMB+GZMH+
CASSLQIGQPQHF	2	3.54333e-05	LB3667P	GBM.pembro.PBMC	P10_CD4+CD8+Naive,P5_CD4+LTB+IL7R+
CASSTTSGDYNEQFF	2	3.54333e-05	LB3667P	GBM.pembro.PBMC	P4_Proliferating,P1_CD8+GZMB+GZMH+
CASGGAGTGELFF	2	3.54333e-05	LB3853P	GBM.pembro.PBMC	P5_CD4+LTB+IL7R+,P1_CD8+GZMB+GZMH+
CASSLVEGIGEQFF	2	3.54333e-05	LB3853P	GBM.pembro.PBMC	P4_Proliferating,P3_CTL
CASGATGNTIYF	2	3.54333e-05	LB4006P	GBM.pembro.PBMC	P2_CD8+GZMK+
CASSIGGGLNQPQHF	2	3.54333e-05	LB4006P	GBM.pembro.PBMC	P2_CD8+GZMK+,P1_CD8+GZMB+GZMH+
CASSLEQLARTDTQYF	2	3.54333e-05	LB4006P	GBM.pembro.PBMC	P1_CD8+GZMB+GZMH+
CASSLGPADNEQFF	2	3.54333e-05	LB4006P	GBM.pembro.PBMC	P1_CD8+GZMB+GZMH+
CATSYFGGETQYF	2	3.54333e-05	LB4006P	GBM.pembro.PBMC	P1_CD8+GZMB+GZMH+
CASSPGPDSYGYTF	2	3.54333e-05	LB4075P	GBM.pembro.PBMC	P10_CD4+CD8+Naive,P1_CD8+GZMB+GZMH+
CASSYTGGDQYF	2	3.54333e-05	LB4075P	GBM.pembro.PBMC	P3_CTL,P9_CD4-CD8-_GZMK+
CAAETTGSDTQYF	1	1.77167e-05	LB3667P	GBM.pembro.PBMC	P2_CD8+GZMK+
CALGEGALDF	1	1.77167e-05	LB3667P	GBM.pembro.PBMC	P10_CD4+CD8+Naive
CALGELIFLLVLQGVGSARQLTF	1	1.77167e-05	LB3667P	GBM.pembro.PBMC	P7_CD4+Naive
CALRTNNNARLMF	1	1.77167e-05	LB3667P	GBM.pembro.PBMC	P2_CD8+GZMK+
CASAPSGMNIQYF	1	1.77167e-05	LB3667P	GBM.pembro.PBMC	P1_CD8+GZMB+GZMH+
CASILGLVNTGELFF	1	1.77167e-05	LB3667P	GBM.pembro.PBMC	P5_CD4+LTB+IL7R+
CASIPGDRQETQYF	1	1.77167e-05	LB3667P	GBM.pembro.PBMC	P5_CD4+LTB+IL7R+
CASNGGADTQYF	1	1.77167e-05	LB3667P	GBM.pembro.PBMC	P7_CD4+Naive
CASNLKVRGNYGYTF	1	1.77167e-05	LB3667P	GBM.pembro.PBMC	P11_CD4-CD8-LTB+IL7R+
CASPYSITNNEQFF	1	1.77167e-05	LB3667P	GBM.pembro.PBMC	P2_CD8+GZMK+
CASQGGAGQPQHF	1	1.77167e-05	LB3667P	GBM.pembro.PBMC	P11_CD4-CD8-LTB+IL7R+
CASRGTPSYEQYF	1	1.77167e-05	LB3667P	GBM.pembro.PBMC	P8_CD8+Naive
CASRIFRGARTEAFF	1	1.77167e-05	LB3667P	GBM.pembro.PBMC	P5_CD4+LTB+IL7R+
CASRSGTGLYNEQFF	1	1.77167e-05	LB3667P	GBM.pembro.PBMC	P5_CD4+LTB+IL7R+
CASSASGDKNEKLFF	1	1.77167e-05	LB3667P	GBM.pembro.PBMC	P2_CD8+GZMK+
CASSENHRGRGGYTF	1	1.77167e-05	LB3667P	GBM.pembro.PBMC	P2_CD8+GZMK+
CASSESAGGQETQYF	1	1.77167e-05	LB3667P	GBM.pembro.PBMC	P5_CD4+LTB+IL7R+
CASSESGLLKEGQYF	1	1.77167e-05	LB3667P	GBM.pembro.PBMC	P2_CD8+GZMK+
CASSESGLMNTEAFF	1	1.77167e-05	LB3667P	GBM.pembro.PBMC	P1_CD8+GZMB+GZMH+
CASSESTRLSENTEAFF	1	1.77167e-05	LB3667P	GBM.pembro.PBMC	P2_CD8+GZMK+
CASSFANGVQPQHF	1	1.77167e-05	LB3667P	GBM.pembro.PBMC	P5_CD4+LTB+IL7R+
CASSFGDRYTGELFF	1	1.77167e-05	LB3667P	GBM.pembro.PBMC	P5_CD4+LTB+IL7R+
CASSFGETYEQYF	1	1.77167e-05	LB3667P	GBM.pembro.PBMC	P2_CD8+GZMK+
CASSFSGNTEAFF	1	1.77167e-05	LB3667P	GBM.pembro.PBMC	P10_CD4+CD8+Naive
CASSFTGRSSGSLGYNEQFF	1	1.77167e-05	LB3667P	GBM.pembro.PBMC	P7_CD4+Naive
CASSGTSGNTIYF	1	1.77167e-05	LB3667P	GBM.pembro.PBMC	P5_CD4+LTB+IL7R+
CASSHLQGSYNEQFF	1	1.77167e-05	LB3667P	GBM.pembro.PBMC	P7_CD4+Naive
CASSHSGSGDEQYF	1	1.77167e-05	LB3667P	GBM.pembro.PBMC	P5_CD4+LTB+IL7R+
CASSIGGLQGLHEQFF	1	1.77167e-05	LB3667P	GBM.pembro.PBMC	P7_CD4+Naive
CASSIRLAGERADTQYF	1	1.77167e-05	LB3667P	GBM.pembro.PBMC	P2_CD8+GZMK+
CASSISYNEQFF	1	1.77167e-05	LB3667P	GBM.pembro.PBMC	P5_CD4+LTB+IL7R+
CASSKAQRINEKLFF	1	1.77167e-05	LB3667P	GBM.pembro.PBMC	P7_CD4+Naive
CASSKDRAGANVLTF	1	1.77167e-05	LB3667P	GBM.pembro.PBMC	P2_CD8+GZMK+
CASSKRAVDEQYF	1	1.77167e-05	LB3667P	GBM.pembro.PBMC	P8_CD8+Naive
CASSLAIGTSFDEQYF	1	1.77167e-05	LB3667P	GBM.pembro.PBMC	P2_CD8+GZMK+
CASSLDGGRDDTQYF	1	1.77167e-05	LB3667P	GBM.pembro.PBMC	P5_CD4+LTB+IL7R+
CASSLGGLVAGEQFF	1	1.77167e-05	LB3667P	GBM.pembro.PBMC	P8_CD8+Naive
CASSLGQGPYEQYF	1	1.77167e-05	LB3667P	GBM.pembro.PBMC	P11_CD4-CD8-LTB+IL7R+
CASSLGRGYNEQFF	1	1.77167e-05	LB3667P	GBM.pembro.PBMC	P5_CD4+LTB+IL7R+
CASSLGTGSNEKLFF	1	1.77167e-05	LB3667P	GBM.pembro.PBMC	P5_CD4+LTB+IL7R+
CASSLIRKNYGYTF	1	1.77167e-05	LB3667P	GBM.pembro.PBMC	P6_Treg
CASSLLTNQPQHF	1	1.77167e-05	LB3667P	GBM.pembro.PBMC	P5_CD4+LTB+IL7R+
CASSLPPNSNQPQHF	1	1.77167e-05	LB3667P	GBM.pembro.PBMC	P2_CD8+GZMK+
CASSLPVGGEQYF	1	1.77167e-05	LB3667P	GBM.pembro.PBMC	P5_CD4+LTB+IL7R+
CASSLRGTVYNEQFF	1	1.77167e-05	LB3667P	GBM.pembro.PBMC	P8_CD8+Naive
CASSLRNPQNYGYTF	1	1.77167e-05	LB3667P	GBM.pembro.PBMC	P6_Treg
CASSLSGGWREKLFF	1	1.77167e-05	LB3667P	GBM.pembro.PBMC	P5_CD4+LTB+IL7R+
CASSLSPGNTIYF	1	1.77167e-05	LB3667P	GBM.pembro.PBMC	P5_CD4+LTB+IL7R+
CASSLVPKIQGPMNTEAFF	1	1.77167e-05	LB3667P	GBM.pembro.PBMC	P7_CD4+Naive
CASSLVTGQAETQYF	1	1.77167e-05	LB3667P	GBM.pembro.PBMC	P5_CD4+LTB+IL7R+
CASSLYEQFF	1	1.77167e-05	LB3667P	GBM.pembro.PBMC	P7_CD4+Naive
CASSNRDRGYEQYF	1	1.77167e-05	LB3667P	GBM.pembro.PBMC	P5_CD4+LTB+IL7R+
CASSPEGVYGYTF	1	1.77167e-05	LB3667P	GBM.pembro.PBMC	P5_CD4+LTB+IL7R+
CASSPRGSNTGELFF	1	1.77167e-05	LB3667P	GBM.pembro.PBMC	P5_CD4+LTB+IL7R+
CASSPTGSPNEKLFF	1	1.77167e-05	LB3667P	GBM.pembro.PBMC	P2_CD8+GZMK+
CASSQDLGESTYEQYF	1	1.77167e-05	LB3667P	GBM.pembro.PBMC	P5_CD4+LTB+IL7R+
CASSQGTGGSYEQYF	1	1.77167e-05	LB3667P	GBM.pembro.PBMC	P1_CD8+GZMB+GZMH+
CASSQLAGVRTDTQYF	1	1.77167e-05	LB3667P	GBM.pembro.PBMC	P6_Treg
CASSQPAEGDTEAFF	1	1.77167e-05	LB3667P	GBM.pembro.PBMC	P5_CD4+LTB+IL7R+
CASSQTRQDNEQFF	1	1.77167e-05	LB3667P	GBM.pembro.PBMC	P2_CD8+GZMK+
CASSRDRIYEQYF	1	1.77167e-05	LB3667P	GBM.pembro.PBMC	P5_CD4+LTB+IL7R+
CASSRGGEETQYF	1	1.77167e-05	LB3667P	GBM.pembro.PBMC	P5_CD4+LTB+IL7R+
CASSRGQGRQETQYF	1	1.77167e-05	LB3667P	GBM.pembro.PBMC	P5_CD4+LTB+IL7R+
CASSRKLNTEAFF	1	1.77167e-05	LB3667P	GBM.pembro.PBMC	P6_Treg
CASSRTSGSFNEQFF	1	1.77167e-05	LB3667P	GBM.pembro.PBMC	P2_CD8+GZMK+
CASSSAGGVQVTQYF	1	1.77167e-05	LB3667P	GBM.pembro.PBMC	P1_CD8+GZMB+GZMH+
CASSSAGTGSYEQYF	1	1.77167e-05	LB3667P	GBM.pembro.PBMC	P7_CD4+Naive
CASSSGELFF	1	1.77167e-05	LB3667P	GBM.pembro.PBMC	P11_CD4-CD8-LTB+IL7R+
CASSSNRGQGNEPLHF	1	1.77167e-05	LB3667P	GBM.pembro.PBMC	P5_CD4+LTB+IL7R+
CASSSRPHGYTF	1	1.77167e-05	LB3667P	GBM.pembro.PBMC	P5_CD4+LTB+IL7R+
CASSSRSGGGETQYF	1	1.77167e-05	LB3667P	GBM.pembro.PBMC	P5_CD4+LTB+IL7R+
CASSSTGTNGYTF	1	1.77167e-05	LB3667P	GBM.pembro.PBMC	P5_CD4+LTB+IL7R+
CASSTDTGTGGYEQYF	1	1.77167e-05	LB3667P	GBM.pembro.PBMC	P2_CD8+GZMK+
CASSVGPPDTQYF	1	1.77167e-05	LB3667P	GBM.pembro.PBMC	P5_CD4+LTB+IL7R+
CASSYGQGPNEQYF	1	1.77167e-05	LB3667P	GBM.pembro.PBMC	P8_CD8+Naive
CASSYSRGGSGANVLTF	1	1.77167e-05	LB3667P	GBM.pembro.PBMC	P5_CD4+LTB+IL7R+
CASTPGGARNEQFF	1	1.77167e-05	LB3667P	GBM.pembro.PBMC	P5_CD4+LTB+IL7R+
CATPASGATQRVADTQYF	1	1.77167e-05	LB3667P	GBM.pembro.PBMC	P5_CD4+LTB+IL7R+
CATSVGTAHEQYF	1	1.77167e-05	LB3667P	GBM.pembro.PBMC	P5_CD4+LTB+IL7R+
CGSAVDRNTGELFF	1	1.77167e-05	LB3667P	GBM.pembro.PBMC	P5_CD4+LTB+IL7R+
CSAGGLRDTEAFF	1	1.77167e-05	LB3667P	GBM.pembro.PBMC	P5_CD4+LTB+IL7R+
CSARGGGNTGELFF	1	1.77167e-05	LB3667P	GBM.pembro.PBMC	P5_CD4+LTB+IL7R+
CSARGGVKSNQPQHF	1	1.77167e-05	LB3667P	GBM.pembro.PBMC	P6_Treg
CSARPGDRGDRNQPQHF	1	1.77167e-05	LB3667P	GBM.pembro.PBMC	P2_CD8+GZMK+
CSAVLGQGYEQYF	1	1.77167e-05	LB3667P	GBM.pembro.PBMC	P5_CD4+LTB+IL7R+
CSVALRTVPYEQYF	1	1.77167e-05	LB3667P	GBM.pembro.PBMC	P5_CD4+LTB+IL7R+
CSVDGTSSTDTQYF	1	1.77167e-05	LB3667P	GBM.pembro.PBMC	P7_CD4+Naive
CSVLTGQNTEAFF	1	1.77167e-05	LB3667P	GBM.pembro.PBMC	P5_CD4+LTB+IL7R+
CSVSKGQFF	1	1.77167e-05	LB3667P	GBM.pembro.PBMC	P5_CD4+LTB+IL7R+
CSVTPGLAYNEQFF	1	1.77167e-05	LB3667P	GBM.pembro.PBMC	P5_CD4+LTB+IL7R+
CAAGGLVVQETQYF	1	1.77167e-05	LB3853P	GBM.pembro.PBMC	P1_CD8+GZMB+GZMH+
CANSLVSGANVLTF	1	1.77167e-05	LB3853P	GBM.pembro.PBMC	P5_CD4+LTB+IL7R+
CASKGLSTDTQYF	1	1.77167e-05	LB3853P	GBM.pembro.PBMC	P3_CTL
CASRETGATGELFF	1	1.77167e-05	LB3853P	GBM.pembro.PBMC	P4_Proliferating
CASRPIWTSLSYEQYF	1	1.77167e-05	LB3853P	GBM.pembro.PBMC	P5_CD4+LTB+IL7R+
CASRRGGDTGELFF	1	1.77167e-05	LB3853P	GBM.pembro.PBMC	L/M doublet
CASRYSHGGARNEQYF	1	1.77167e-05	LB3853P	GBM.pembro.PBMC	Platelet
CASSFAVAGIGDTQYF	1	1.77167e-05	LB3853P	GBM.pembro.PBMC	P9_CD4-CD8-_GZMK+
CASSFGRGQGNQPQHF	1	1.77167e-05	LB3853P	GBM.pembro.PBMC	P3_CTL
CASSFSWTGITEAFF	1	1.77167e-05	LB3853P	GBM.pembro.PBMC	P9_CD4-CD8-_GZMK+
CASSFVGNYGYTF	1	1.77167e-05	LB3853P	GBM.pembro.PBMC	P3_CTL
CASSLERGGDTQYI	1	1.77167e-05	LB3853P	GBM.pembro.PBMC	P3_CTL
CASSLGSLGTEAFF	1	1.77167e-05	LB3853P	GBM.pembro.PBMC	P4_Proliferating
CASSLQGPQETQYF	1	1.77167e-05	LB3853P	GBM.pembro.PBMC	P3_CTL
CASSPIRIGRTQEKLFF	1	1.77167e-05	LB3853P	GBM.pembro.PBMC	P2_CD8+GZMK+
CASSPLGTTDTQYF	1	1.77167e-05	LB3853P	GBM.pembro.PBMC	Platelet
CASSPRRHEETQYF	1	1.77167e-05	LB3853P	GBM.pembro.PBMC	P3_CTL
CASSPTRSYEQYF	1	1.77167e-05	LB3853P	GBM.pembro.PBMC	P5_CD4+LTB+IL7R+
CASSPVQSTGELFF	1	1.77167e-05	LB3853P	GBM.pembro.PBMC	P9_CD4-CD8-_GZMK+
CASSQGRYTGELFF	1	1.77167e-05	LB3853P	GBM.pembro.PBMC	P3_CTL
CASSQSLPPGELFF	1	1.77167e-05	LB3853P	GBM.pembro.PBMC	P2_CD8+GZMK+
CASSQVIQGSQPQHF	1	1.77167e-05	LB3853P	GBM.pembro.PBMC	P2_CD8+GZMK+
CASSRYNEQFF	1	1.77167e-05	LB3853P	GBM.pembro.PBMC	P4_Proliferating
CASSSGPRHGELFF	1	1.77167e-05	LB3853P	GBM.pembro.PBMC	P5_CD4+LTB+IL7R+
CASSSGQGNTEAFF	1	1.77167e-05	LB3853P	GBM.pembro.PBMC	P3_CTL
CASSSPIGDTDGYEQYF	1	1.77167e-05	LB3853P	GBM.pembro.PBMC	P1_CD8+GZMB+GZMH+
CASSYRDSYEQYF	1	1.77167e-05	LB3853P	GBM.pembro.PBMC	P5_CD4+LTB+IL7R+
CASSYSDNTGELFF	1	1.77167e-05	LB3853P	GBM.pembro.PBMC	P5_CD4+LTB+IL7R+
CASSYSPGRRSHEQYF	1	1.77167e-05	LB3853P	GBM.pembro.PBMC	P5_CD4+LTB+IL7R+
CDSSDGTQETQYF	1	1.77167e-05	LB3853P	GBM.pembro.PBMC	P1_CD8+GZMB+GZMH+
CSAGHTGNTEAFF	1	1.77167e-05	LB3853P	GBM.pembro.PBMC	P6_Treg
CSAQRQTDTQYF	1	1.77167e-05	LB3853P	GBM.pembro.PBMC	P2_CD8+GZMK+
CSARAGGQGRGYTF	1	1.77167e-05	LB3853P	GBM.pembro.PBMC	P2_CD8+GZMK+
CSARFRFGAVTQYF	1	1.77167e-05	LB3853P	GBM.pembro.PBMC	P3_CTL
CSAVHTNYGYTF	1	1.77167e-05	LB3853P	GBM.pembro.PBMC	P1_CD8+GZMB+GZMH+
CSVEIRDRGKTGELFF	1	1.77167e-05	LB3853P	GBM.pembro.PBMC	P4_Proliferating
CSVEREAGGAEAFF	1	1.77167e-05	LB3853P	GBM.pembro.PBMC	P4_Proliferating
CANGTSGSYEQYF	1	1.77167e-05	LB3864P	GBM.pembro.PBMC	P3_CTL
CASHGQERSEQYF	1	1.77167e-05	LB3864P	GBM.pembro.PBMC	P3_CTL
CASSDLSSYNEQFF	1	1.77167e-05	LB3864P	GBM.pembro.PBMC	P13_gdT
CASSERNSPVSALHF	1	1.77167e-05	LB3864P	GBM.pembro.PBMC	LowRead
CASSEVFAPLNEQYF	1	1.77167e-05	LB3864P	GBM.pembro.PBMC	P1_CD8+GZMB+GZMH+
CASSFGLQYF	1	1.77167e-05	LB3864P	GBM.pembro.PBMC	P4_Proliferating
CASSFTQDRQYF	1	1.77167e-05	LB3864P	GBM.pembro.PBMC	P3_CTL
CASSHTRTGPYEQYF	1	1.77167e-05	LB3864P	GBM.pembro.PBMC	LowRead
CASSKYDQETQYF	1	1.77167e-05	LB3864P	GBM.pembro.PBMC	P3_CTL
CASSLAGQETQYF	1	1.77167e-05	LB3864P	GBM.pembro.PBMC	P3_CTL
CASSLGTSGIDTQYF	1	1.77167e-05	LB3864P	GBM.pembro.PBMC	P3_CTL
CASSLLAGTPYEQYF	1	1.77167e-05	LB3864P	GBM.pembro.PBMC	P4_Proliferating
CASSLQGASPLHF	1	1.77167e-05	LB3864P	GBM.pembro.PBMC	P3_CTL
CASSPDGNQPQHF	1	1.77167e-05	LB3864P	GBM.pembro.PBMC	P13_gdT
CASSPGPTTSGNTIYF	1	1.77167e-05	LB3864P	GBM.pembro.PBMC	P3_CTL
CASSPSTGTSGLGYYEQYF	1	1.77167e-05	LB3864P	GBM.pembro.PBMC	P4_Proliferating
CASSQVTGSTGELFF	1	1.77167e-05	LB3864P	GBM.pembro.PBMC	P3_CTL
CASSRSQYYEQYF	1	1.77167e-05	LB3864P	GBM.pembro.PBMC	P3_CTL
CASSSRWRGPTDTQYF	1	1.77167e-05	LB3864P	GBM.pembro.PBMC	P5_CD4+LTB+IL7R+
CASSWTGGSTDTQYF	1	1.77167e-05	LB3864P	GBM.pembro.PBMC	P3_CTL
CATRGGNNQPQHF	1	1.77167e-05	LB3864P	GBM.pembro.PBMC	P6_Treg
CSAPGGLAGTYNEQFF	1	1.77167e-05	LB3864P	GBM.pembro.PBMC	P3_CTL
CSDGGNEQFF	1	1.77167e-05	LB3864P	GBM.pembro.PBMC	P3_CTL
GASSPQGTGETQYF	1	1.77167e-05	LB3864P	GBM.pembro.PBMC	P5_CD4+LTB+IL7R+
CAAQRQGGAISNQPQHF	1	1.77167e-05	LB3914P	GBM.pembro.PBMC	P5_CD4+LTB+IL7R+
CAISESRHGESYEQYF	1	1.77167e-05	LB3914P	GBM.pembro.PBMC	P5_CD4+LTB+IL7R+
CANSLGSSGTPSTDTQYF	1	1.77167e-05	LB3914P	GBM.pembro.PBMC	P5_CD4+LTB+IL7R+
CASCPNGFVGNEQFF	1	1.77167e-05	LB3914P	GBM.pembro.PBMC	P5_CD4+LTB+IL7R+
CASGTGGAGTDTQYF	1	1.77167e-05	LB3914P	GBM.pembro.PBMC	P1_CD8+GZMB+GZMH+
CASMGGGGVDTQYF	1	1.77167e-05	LB3914P	GBM.pembro.PBMC	P5_CD4+LTB+IL7R+
CASRDTRPHTDTQYF	1	1.77167e-05	LB3914P	GBM.pembro.PBMC	P5_CD4+LTB+IL7R+
CASRGENAEAFF	1	1.77167e-05	LB3914P	GBM.pembro.PBMC	P2_CD8+GZMK+
CASRKHSQETQYF	1	1.77167e-05	LB3914P	GBM.pembro.PBMC	P5_CD4+LTB+IL7R+
CASRPRTGISNQPQHF	1	1.77167e-05	LB3914P	GBM.pembro.PBMC	Platelet
CASRQTGTNEQFF	1	1.77167e-05	LB3914P	GBM.pembro.PBMC	P5_CD4+LTB+IL7R+
CASRRGNGNTIYF	1	1.77167e-05	LB3914P	GBM.pembro.PBMC	P7_CD4+Naive
CASRYPVSQETQYF	1	1.77167e-05	LB3914P	GBM.pembro.PBMC	P5_CD4+LTB+IL7R+
CASSALAGGSTDTQYF	1	1.77167e-05	LB3914P	GBM.pembro.PBMC	P5_CD4+LTB+IL7R+
CASSASDSYLETQYF	1	1.77167e-05	LB3914P	GBM.pembro.PBMC	P5_CD4+LTB+IL7R+
CASSAWTGTGDSPLHF	1	1.77167e-05	LB3914P	GBM.pembro.PBMC	P7_CD4+Naive
CASSDRGYEQYF	1	1.77167e-05	LB3914P	GBM.pembro.PBMC	P10_CD4+CD8+Naive
CASSESSRLASEQFF	1	1.77167e-05	LB3914P	GBM.pembro.PBMC	P5_CD4+LTB+IL7R+
CASSFDRDRGYGYTF	1	1.77167e-05	LB3914P	GBM.pembro.PBMC	P3_CTL
CASSFGGQDTQYF	1	1.77167e-05	LB3914P	GBM.pembro.PBMC	P5_CD4+LTB+IL7R+
CASSFLGSGGTSYNEQFF	1	1.77167e-05	LB3914P	GBM.pembro.PBMC	P5_CD4+LTB+IL7R+
CASSFLPGAPNTEAFF	1	1.77167e-05	LB3914P	GBM.pembro.PBMC	P11_CD4-CD8-LTB+IL7R+
CASSFPGRNTGELFF	1	1.77167e-05	LB3914P	GBM.pembro.PBMC	P9_CD4-CD8-_GZMK+
CASSFRSGGVDTQYF	1	1.77167e-05	LB3914P	GBM.pembro.PBMC	P5_CD4+LTB+IL7R+
CASSFTGGGEQFF	1	1.77167e-05	LB3914P	GBM.pembro.PBMC	P8_CD8+Naive
CASSFVETQYF	1	1.77167e-05	LB3914P	GBM.pembro.PBMC	P5_CD4+LTB+IL7R+
CASSGVETGAWIDTQYF	1	1.77167e-05	LB3914P	GBM.pembro.PBMC	P5_CD4+LTB+IL7R+
CASSHTSGGTDTQYF	1	1.77167e-05	LB3914P	GBM.pembro.PBMC	P8_CD8+Naive
CASSIDWDTEAFF	1	1.77167e-05	LB3914P	GBM.pembro.PBMC	P6_Treg
CASSILAGVKETQYF	1	1.77167e-05	LB3914P	GBM.pembro.PBMC	P9_CD4-CD8-_GZMK+
CASSISGGTSYEQYF	1	1.77167e-05	LB3914P	GBM.pembro.PBMC	P5_CD4+LTB+IL7R+
CASSLATGVGYTF	1	1.77167e-05	LB3914P	GBM.pembro.PBMC	P5_CD4+LTB+IL7R+
CASSLEQGARNEQFF	1	1.77167e-05	LB3914P	GBM.pembro.PBMC	P5_CD4+LTB+IL7R+
CASSLESPDRNSYEQYF	1	1.77167e-05	LB3914P	GBM.pembro.PBMC	P5_CD4+LTB+IL7R+
CASSLGAGVLFPYF	1	1.77167e-05	LB3914P	GBM.pembro.PBMC	P11_CD4-CD8-LTB+IL7R+
CASSLGGPSTDTQYF	1	1.77167e-05	LB3914P	GBM.pembro.PBMC	P8_CD8+Naive
CASSLGLAGGRTKELFF	1	1.77167e-05	LB3914P	GBM.pembro.PBMC	P5_CD4+LTB+IL7R+
CASSLGPGALQETQYF	1	1.77167e-05	LB3914P	GBM.pembro.PBMC	P8_CD8+Naive
CASSLMGGREQYF	1	1.77167e-05	LB3914P	GBM.pembro.PBMC	P5_CD4+LTB+IL7R+
CASSLMSLTSGGLSNEQFF	1	1.77167e-05	LB3914P	GBM.pembro.PBMC	P5_CD4+LTB+IL7R+
CASSLSGSPLHF	1	1.77167e-05	LB3914P	GBM.pembro.PBMC	P5_CD4+LTB+IL7R+
CASSLVAGGLNEQFF	1	1.77167e-05	LB3914P	GBM.pembro.PBMC	P2_CD8+GZMK+
CASSLVAGGNEQFF	1	1.77167e-05	LB3914P	GBM.pembro.PBMC	P7_CD4+Naive
CASSLVQGGTGSGFNEQFF	1	1.77167e-05	LB3914P	GBM.pembro.PBMC	P8_CD8+Naive
CASSLYQGQETQYF	1	1.77167e-05	LB3914P	GBM.pembro.PBMC	P5_CD4+LTB+IL7R+
CASSNSIGQGNIQYF	1	1.77167e-05	LB3914P	GBM.pembro.PBMC	P7_CD4+Naive
CASSPDGSYNEQFF	1	1.77167e-05	LB3914P	GBM.pembro.PBMC	P5_CD4+LTB+IL7R+
CASSPDRGPGEKLFF	1	1.77167e-05	LB3914P	GBM.pembro.PBMC	P5_CD4+LTB+IL7R+
CASSPFPRGNTGELFF	1	1.77167e-05	LB3914P	GBM.pembro.PBMC	P5_CD4+LTB+IL7R+
CASSPGTGDGDTEAFF	1	1.77167e-05	LB3914P	GBM.pembro.PBMC	P8_CD8+Naive
CASSPGTWAEAFF	1	1.77167e-05	LB3914P	GBM.pembro.PBMC	P8_CD8+Naive
CASSPIHPGEQYF	1	1.77167e-05	LB3914P	GBM.pembro.PBMC	Platelet
CASSPLAGKNTEAFF	1	1.77167e-05	LB3914P	GBM.pembro.PBMC	P6_Treg
CASSPLVGTGWGASHEKLFF	1	1.77167e-05	LB3914P	GBM.pembro.PBMC	P2_CD8+GZMK+
CASSPNMGLAGLTGELFF	1	1.77167e-05	LB3914P	GBM.pembro.PBMC	P7_CD4+Naive
CASSPRGPSNQPQHF	1	1.77167e-05	LB3914P	GBM.pembro.PBMC	P7_CD4+Naive
CASSPTGNYGYTF	1	1.77167e-05	LB3914P	GBM.pembro.PBMC	P8_CD8+Naive
CASSQDKGTYEQYF	1	1.77167e-05	LB3914P	GBM.pembro.PBMC	P5_CD4+LTB+IL7R+
CASSQDRGQVGRHAEAFF	1	1.77167e-05	LB3914P	GBM.pembro.PBMC	P5_CD4+LTB+IL7R+
CASSQGARTRAYNEQFF	1	1.77167e-05	LB3914P	GBM.pembro.PBMC	P5_CD4+LTB+IL7R+
CASSQPARKPGNQPQHF	1	1.77167e-05	LB3914P	GBM.pembro.PBMC	P5_CD4+LTB+IL7R+
CASSQQGGQSYEQYF	1	1.77167e-05	LB3914P	GBM.pembro.PBMC	P11_CD4-CD8-LTB+IL7R+
CASSQVWRDRASYEQYF	1	1.77167e-05	LB3914P	GBM.pembro.PBMC	P2_CD8+GZMK+
CASSRGPTGSSEPLHF	1	1.77167e-05	LB3914P	GBM.pembro.PBMC	P5_CD4+LTB+IL7R+
CASSRHYGYTF	1	1.77167e-05	LB3914P	GBM.pembro.PBMC	P7_CD4+Naive
CASSSHSGLGTIYF	1	1.77167e-05	LB3914P	GBM.pembro.PBMC	P5_CD4+LTB+IL7R+
CASSSLRQGGNRYTF	1	1.77167e-05	LB3914P	GBM.pembro.PBMC	P5_CD4+LTB+IL7R+
[truncated: 279 more rows]
