# Supplementary material for: Neoadjuvant PD-1 blockade induces T cell and cDC1 activation but fails to overcome the immunosuppressive tumor associated macrophages in recurrent glioblastoma
Source: Research Square preprint supplement (doi:10.21203/rs.3.rs-793187/v1), 2021-08-13
Supplement: Supplementary file 6 [file SuppTable6-scRNAseq-Myeloid.xlsx]

## Sheet: Markers
Gene	p_val	avg_logFC	pct.1	pct.2	p_val_adj	cluster	gene	diffPct
AREG1	0	1.65946	0.655	0.246	0	DC	AREG	0.409
FCER1A	0	1.41477	0.311	0.023	0	DC	FCER1A	0.288
HLA-DQA12	0	1.14255	0.842	0.669	0	DC	HLA-DQA1	0.173
HLA-DPB11	0	1.01922	0.904	0.829	0	DC	HLA-DPB1	0.075
PPA11	0	0.993025	0.628	0.344	0	DC	PPA1	0.284
HLA-DPA11	0	0.898924	0.92	0.85	0	DC	HLA-DPA1	0.07
HLA-DQB11	0	0.870341	0.865	0.752	0	DC	HLA-DQB1	0.113
C15orf482	6.04618e-231	0.867892	0.358	0.147	9.05537e-227	DC	C15orf48	0.211
LSP12	3.44056e-303	0.816893	0.637	0.36	5.15292e-299	DC	LSP1	0.277
BIRC3	1.39216e-143	0.764304	0.295	0.135	2.08504e-139	DC	BIRC3	0.16
JAML1	0	0.713228	0.402	0.121	0	DC	JAML	0.281
CNN21	0	0.706679	0.416	0.11	0	DC	CNN2	0.306
HLA-DRB12	0	0.705616	0.915	0.865	0	DC	HLA-DRB1	0.05
HLA-DRA1	0	0.704836	0.968	0.934	0	DC	HLA-DRA	0.034
STK17B1	4.78379e-299	0.694202	0.595	0.321	7.16469e-295	DC	STK17B	0.274
PLAC81	1.59404e-193	0.662578	0.352	0.157	2.38739e-189	DC	PLAC8	0.195
CRYBG1	0	0.660997	0.382	0.129	0	DC	CRYBG1	0.253
CST7	0	0.645184	0.294	0.075	0	DC	CST7	0.219
TXN3	3.92963e-46	0.643595	0.561	0.436	5.8854e-42	DC	TXN	0.125
CST3	5.56687e-217	0.642926	0.894	0.843	8.3375e-213	DC	CST3	0.051
INSIG1	3.20859e-144	0.631376	0.407	0.22	4.80551e-140	DC	INSIG1	0.187
HLA-DQA2	1.6923e-75	0.616147	0.258	0.141	2.53456e-71	DC	HLA-DQA2	0.117
ISG201	0	0.604245	0.492	0.209	0	DC	ISG20	0.283
DUSP4	2.21333e-202	0.592988	0.379	0.172	3.3149e-198	DC	DUSP4	0.207
ACTG11	4.07212e-183	0.57681	0.851	0.773	6.09881e-179	DC	ACTG1	0.078
RAB11FIP1	2.80391e-153	0.544933	0.281	0.124	4.19942e-149	DC	RAB11FIP1	0.157
LCP11	2.33052e-145	0.541984	0.612	0.423	3.49042e-141	DC	LCP1	0.189
CD481	8.21488e-294	0.541358	0.494	0.225	1.23034e-289	DC	CD48	0.269
CD742	1.33823e-203	0.541168	0.963	0.951	2.00426e-199	DC	CD74	0.012
EEF1G	4.07816e-46	0.536606	0.274	0.179	6.10786e-42	DC	EEF1G	0.095
GSTP11	5.25885e-156	0.521313	0.743	0.596	7.87618e-152	DC	GSTP1	0.147
DUSP5	0	0.520169	0.259	0.073	0	DC	DUSP5	0.186
EEF1A1	8.74773e-275	0.51957	0.949	0.934	1.31015e-270	DC	EEF1A1	0.015
PTPN1	2.83384e-174	0.511268	0.565	0.348	4.24424e-170	DC	PTPN1	0.217
EEF1B2	1.31403e-192	0.50379	0.803	0.705	1.96803e-188	DC	EEF1B2	0.098
LITAF1	2.79564e-178	0.502184	0.723	0.548	4.18703e-174	DC	LITAF	0.175
VIM2	9.19644e-206	0.49614	0.861	0.692	1.37735e-201	DC	VIM	0.169
PKIB	9.04363e-240	0.487799	0.338	0.13	1.35446e-235	DC	PKIB	0.208
COTL11	1.46806e-110	0.485863	0.76	0.658	2.19872e-106	DC	COTL1	0.102
FILIP1L	3.22769e-100	0.485845	0.422	0.257	4.83411e-96	DC	FILIP1L	0.165
TUBA1A	2.63051e-124	0.47692	0.565	0.385	3.93971e-120	DC	TUBA1A	0.18
CPNE3	5.9722e-56	0.468265	0.301	0.195	8.94457e-52	DC	CPNE3	0.106
GAPT	3.70722e-191	0.466427	0.337	0.15	5.5523e-187	DC	GAPT	0.187
SUB11	4.48011e-153	0.452818	0.73	0.57	6.70986e-149	DC	SUB1	0.16
HLA-DRB51	1.00269e-40	0.451208	0.609	0.574	1.50173e-36	DC	HLA-DRB5	0.035
GPR1831	2.28287e-104	0.448724	0.73	0.579	3.41906e-100	DC	GPR183	0.151
ICAM31	0	0.444269	0.328	0.101	0	DC	ICAM3	0.227
CD521	1.56537e-93	0.443648	0.272	0.139	2.34446e-89	DC	CD52	0.133
SERPINB11	7.49342e-79	0.437859	0.641	0.502	1.12229e-74	DC	SERPINB1	0.139
PSME22	1.95775e-100	0.435917	0.655	0.495	2.93213e-96	DC	PSME2	0.16
CALHM61	1.1102e-101	0.43319	0.501	0.328	1.66275e-97	DC	CALHM6	0.173
LYZ1	1.46336e-178	0.432373	0.679	0.45	2.19167e-174	DC	LYZ	0.229
HERPUD11	1.07068e-85	0.427146	0.799	0.718	1.60356e-81	DC	HERPUD1	0.081
TNFAIP8	1.73123e-135	0.426679	0.358	0.186	2.59286e-131	DC	TNFAIP8	0.172
FGL2	1.80095e-120	0.424173	0.642	0.464	2.69728e-116	DC	FGL2	0.178
FCGR2B1	1.28031e-116	0.419831	0.436	0.251	1.91752e-112	DC	FCGR2B	0.185
SLC25A5	4.67983e-133	0.414028	0.718	0.555	7.00898e-129	DC	SLC25A5	0.163
PAK1	1.17321e-167	0.411601	0.475	0.276	1.75711e-163	DC	PAK1	0.199
AHNAK1	6.36624e-163	0.40996	0.412	0.206	9.53472e-159	DC	AHNAK	0.206
SPINT2	1.05806e-137	0.408538	0.552	0.365	1.58466e-133	DC	SPINT2	0.187
SNX3	3.61121e-59	0.408467	0.682	0.564	5.40852e-55	DC	SNX3	0.118
CIITA	8.146e-166	0.405477	0.44	0.235	1.22003e-161	DC	CIITA	0.205
ARPC21	1.22962e-136	0.400631	0.785	0.672	1.84159e-132	DC	ARPC2	0.113
TAP11	5.92379e-108	0.399563	0.385	0.228	8.87206e-104	DC	TAP1	0.157
WARS2	2.56476e-70	0.398862	0.331	0.205	3.84124e-66	DC	WARS	0.126
MYL12A1	7.42835e-124	0.398309	0.741	0.611	1.11254e-119	DC	MYL12A	0.13
PSMB92	5.47406e-112	0.396302	0.561	0.387	8.1985e-108	DC	PSMB9	0.174
DAPP1	7.03105e-187	0.394445	0.255	0.096	1.05304e-182	DC	DAPP1	0.159
CPVL	2.49947e-19	0.394297	0.57	0.509	3.74345e-15	DC	CPVL	0.061
EIF3L	1.39037e-137	0.393979	0.646	0.462	2.08235e-133	DC	EIF3L	0.184
CYTIP1	1.75006e-156	0.388421	0.485	0.28	2.62106e-152	DC	CYTIP	0.205
LIMD21	2.00395e-141	0.384612	0.479	0.282	3.00131e-137	DC	LIMD2	0.197
C1orf1621	6.30154e-103	0.383941	0.721	0.608	9.43781e-99	DC	C1orf162	0.113
GDI2	6.23825e-116	0.383807	0.614	0.454	9.34302e-112	DC	GDI2	0.16
SEPT6	4.17665e-152	0.382573	0.495	0.297	6.25536e-148	DC	SEPT6	0.198
EIF3F	1.94904e-125	0.380219	0.679	0.513	2.91908e-121	DC	EIF3F	0.166
NFKB11	9.15907e-78	0.379527	0.488	0.332	1.37175e-73	DC	NFKB1	0.156
EZR	1.56161e-83	0.37738	0.536	0.376	2.33883e-79	DC	EZR	0.16
C12orf45	4.90299e-186	0.375618	0.313	0.134	7.3432e-182	DC	C12orf45	0.179
GBP12	1.88309e-36	0.371356	0.266	0.18	2.82031e-32	DC	GBP1	0.086
BASP1	1.45159e-79	0.370165	0.626	0.471	2.17404e-75	DC	BASP1	0.155
RACK1	5.62231e-142	0.367439	0.846	0.792	8.42054e-138	DC	RACK1	0.054
BTF3	4.48955e-128	0.3673	0.794	0.699	6.72399e-124	DC	BTF3	0.095
PRELID11	1.06609e-99	0.367161	0.616	0.457	1.59668e-95	DC	PRELID1	0.159
TAGLN22	1.01373e-94	0.366872	0.585	0.427	1.51827e-90	DC	TAGLN2	0.158
PSME12	8.99265e-117	0.366449	0.665	0.507	1.34683e-112	DC	PSME1	0.158
ALDH2	1.00251e-108	0.364694	0.642	0.482	1.50146e-104	DC	ALDH2	0.16
PSTPIP2	2.42674e-162	0.364476	0.369	0.182	3.63453e-158	DC	PSTPIP2	0.187
ACTR3	2.29596e-84	0.362967	0.605	0.46	3.43866e-80	DC	ACTR3	0.145
RALA1	9.23967e-149	0.361249	0.41	0.219	1.38382e-144	DC	RALA	0.191
TMSB101	1.72766e-130	0.360677	0.937	0.924	2.58751e-126	DC	TMSB10	0.013
CD551	1.9422e-126	0.358303	0.52	0.327	2.90883e-122	DC	CD55	0.193
REL1	6.23344e-58	0.353288	0.767	0.659	9.33582e-54	DC	REL	0.108
AHR	1.25491e-112	0.352296	0.315	0.162	1.87948e-108	DC	AHR	0.153
ARF6	2.06125e-124	0.352012	0.564	0.379	3.08713e-120	DC	ARF6	0.185
IRF11	1.40328e-47	0.351087	0.39	0.276	2.10169e-43	DC	IRF1	0.114
HINT1	1.30951e-95	0.350446	0.696	0.552	1.96125e-91	DC	HINT1	0.144
DUSP2	2.04534e-67	0.350305	0.475	0.327	3.0633e-63	DC	DUSP2	0.148
FNBP1	7.42684e-90	0.348227	0.493	0.338	1.11232e-85	DC	FNBP1	0.155
CYTOR1	1.51351e-128	0.344325	0.356	0.186	2.26679e-124	DC	CYTOR	0.17
SERPINB91	1.29159e-60	0.341325	0.623	0.492	1.93441e-56	DC	SERPINB9	0.131
ACTB1	1.31059e-89	0.334876	0.937	0.931	1.96286e-85	DC	ACTB	0.006
OSBPL8	1.87396e-99	0.331275	0.483	0.314	2.80663e-95	DC	OSBPL8	0.169
MAP3K81	1.66245e-73	0.331102	0.634	0.496	2.48986e-69	DC	MAP3K8	0.138
SATB1	7.74265e-121	0.331037	0.278	0.131	1.15962e-116	DC	SATB1	0.147
EEF2	6.62398e-94	0.330851	0.781	0.692	9.92073e-90	DC	EEF2	0.089
MALT1	3.42853e-83	0.329727	0.354	0.214	5.13492e-79	DC	MALT1	0.14
BID	8.04472e-88	0.329696	0.499	0.342	1.20486e-83	DC	BID	0.157
CCNI	1.12882e-106	0.329675	0.726	0.59	1.69064e-102	DC	CCNI	0.136
IFITM32	5.33363e-38	0.329599	0.632	0.54	7.98818e-34	DC	IFITM3	0.092
TES1	8.0588e-176	0.327826	0.384	0.185	1.20697e-171	DC	TES	0.199
NDRG2	1.4555e-188	0.327247	0.369	0.166	2.17991e-184	DC	NDRG2	0.203
CKLF	4.71211e-62	0.324296	0.587	0.453	7.05733e-58	DC	CKLF	0.134
CCL5	0	1.60677	0.641	0.132	0	L+M	CCL5	0.509
IL32	0	1.43698	0.623	0.066	0	L+M	IL32	0.557
NKG7	0	1.31336	0.508	0.083	0	L+M	NKG7	0.425
IL7R	0	1.17554	0.462	0.085	0	L+M	IL7R	0.377
CD3D	0	1.10668	0.572	0.038	0	L+M	CD3D	0.534
GZMA	0	1.033	0.494	0.029	0	L+M	GZMA	0.465
CD522	0	1.03155	0.614	0.125	0	L+M	CD52	0.489
FYN	0	0.987606	0.5	0.048	0	L+M	FYN	0.452
GZMK	0	0.958786	0.423	0.025	0	L+M	GZMK	0.398
CD3E	0	0.914499	0.536	0.032	0	L+M	CD3E	0.504
CD2	0	0.909175	0.543	0.037	0	L+M	CD2	0.506
TRBC2	0	0.888829	0.493	0.033	0	L+M	TRBC2	0.46
CST71	0	0.792839	0.492	0.067	0	L+M	CST7	0.425
RUNX3	0	0.790184	0.503	0.124	0	L+M	RUNX3	0.379
TRAC	0	0.777622	0.447	0.028	0	L+M	TRAC	0.419
TRBC1	0	0.7693	0.389	0.026	0	L+M	TRBC1	0.363
ETS1	0	0.750611	0.481	0.069	0	L+M	ETS1	0.412
ISG202	0	0.742085	0.605	0.204	0	L+M	ISG20	0.401
LTB	0	0.729366	0.39	0.058	0	L+M	LTB	0.332
SYNE2	0	0.728994	0.402	0.036	0	L+M	SYNE2	0.366
CD8A	0	0.708318	0.357	0.02	0	L+M	CD8A	0.337
GZMH	0	0.697337	0.356	0.019	0	L+M	GZMH	0.337
TUBA4A	0	0.693403	0.484	0.054	0	L+M	TUBA4A	0.43
RNF19A	0	0.687143	0.473	0.151	0	L+M	RNF19A	0.322
ACAP1	0	0.677428	0.482	0.075	0	L+M	ACAP1	0.407
CD7	0	0.649165	0.47	0.11	0	L+M	CD7	0.36
PPP2R5C	0	0.608008	0.554	0.258	0	L+M	PPP2R5C	0.296
GZMB	0	0.599365	0.266	0.019	0	L+M	GZMB	0.247
CNOT6L	0	0.580554	0.459	0.134	0	L+M	CNOT6L	0.325
LCK	0	0.574751	0.434	0.023	0	L+M	LCK	0.411
SPOCK2	0	0.560463	0.412	0.025	0	L+M	SPOCK2	0.387
SMCHD11	1.65928e-281	0.5553	0.532	0.255	2.4851e-277	L+M	SMCHD1	0.277
CTSW	0	0.548479	0.363	0.034	0	L+M	CTSW	0.329
KIAA1551	1.32127e-266	0.543807	0.499	0.232	1.97887e-262	L+M	KIAA1551	0.267
CYTIP2	0	0.542662	0.599	0.275	0	L+M	CYTIP	0.324
CD3G	0	0.538949	0.404	0.021	0	L+M	CD3G	0.383
CRYBG11	0	0.535161	0.426	0.128	0	L+M	CRYBG1	0.298
IRF12	1.02151e-254	0.526975	0.562	0.269	1.52992e-250	L+M	IRF1	0.293
ARL4C1	2.15899e-225	0.522491	0.579	0.298	3.23351e-221	L+M	ARL4C	0.281
DUSP21	8.0524e-273	0.519667	0.637	0.32	1.20601e-268	L+M	DUSP2	0.317
CD482	0	0.517096	0.533	0.223	0	L+M	CD48	0.31
STK17B2	4.64568e-254	0.510518	0.599	0.321	6.95784e-250	L+M	STK17B	0.278
RAC22	0	0.50997	0.575	0.261	0	L+M	RAC2	0.314
DUSP41	0	0.509331	0.473	0.168	0	L+M	DUSP4	0.305
TOB1	1.84153e-283	0.504302	0.437	0.174	2.75806e-279	L+M	TOB1	0.263
PRF1	0	0.501064	0.304	0.017	0	L+M	PRF1	0.287
AKNA	0	0.49149	0.514	0.215	0	L+M	AKNA	0.299
SYTL3	8.19978e-291	0.483965	0.487	0.205	1.22808e-286	L+M	SYTL3	0.282
LEPROTL1	5.70119e-248	0.476754	0.584	0.314	8.53867e-244	L+M	LEPROTL1	0.27
TXNIP1	1.87659e-164	0.473173	0.72	0.518	2.81057e-160	L+M	TXNIP	0.202
ADGRE51	1.1235e-288	0.469573	0.537	0.24	1.68266e-284	L+M	ADGRE5	0.297
RARRES31	7.3126e-267	0.45334	0.57	0.281	1.09521e-262	L+M	RARRES3	0.289
CEMIP2	0	0.452272	0.409	0.124	0	L+M	CEMIP2	0.285
ITM2A	0	0.452215	0.347	0.019	0	L+M	ITM2A	0.328
SYNE1	0	0.451189	0.338	0.082	0	L+M	SYNE1	0.256
GZMM	0	0.448693	0.375	0.017	0	L+M	GZMM	0.358
CD8B	0	0.441123	0.287	0.012	0	L+M	CD8B	0.275
IKZF3	0	0.438999	0.343	0.022	0	L+M	IKZF3	0.321
IFITM1	9.31172e-291	0.438659	0.259	0.071	1.39462e-286	L+M	IFITM1	0.188
BTG11	9.78092e-175	0.438587	0.83	0.757	1.46489e-170	L+M	BTG1	0.073
IL2RG	0	0.435053	0.42	0.091	0	L+M	IL2RG	0.329
FAM107B1	4.16331e-203	0.434711	0.408	0.181	6.2354e-199	L+M	FAM107B	0.227
CD27	0	0.430917	0.32	0.017	0	L+M	CD27	0.303
SLC38A1	0	0.427749	0.35	0.029	0	L+M	SLC38A1	0.321
PDCD4	9.63264e-224	0.424866	0.51	0.253	1.44268e-219	L+M	PDCD4	0.257
PTPRC	5.0131e-118	0.423856	0.701	0.569	7.50813e-114	L+M	PTPRC	0.132
CBLB	0	0.422341	0.372	0.091	0	L+M	CBLB	0.281
FLNA2	2.52279e-284	0.42013	0.456	0.177	3.77839e-280	L+M	FLNA	0.279
CLEC2D	0	0.419436	0.417	0.087	0	L+M	CLEC2D	0.33
SEPT91	0	0.414758	0.467	0.182	0	L+M	SEPT9	0.285
ZFP36L21	5.69297e-123	0.413637	0.79	0.691	8.52637e-119	L+M	ZFP36L2	0.099
STK17A	4.30696e-304	0.413328	0.522	0.228	6.45054e-300	L+M	STK17A	0.294
RORA	0	0.413226	0.308	0.021	0	L+M	RORA	0.287
CD442	2.80314e-179	0.411072	0.651	0.383	4.19827e-175	L+M	CD44	0.268
ITK	0	0.408124	0.31	0.017	0	L+M	ITK	0.293
ANXA6	0	0.405421	0.341	0.076	0	L+M	ANXA6	0.265
CD96	0	0.405154	0.357	0.02	0	L+M	CD96	0.337
TSC22D3	3.78494e-122	0.404359	0.784	0.67	5.6687e-118	L+M	TSC22D3	0.114
TNFAIP3	3.6336e-136	0.399762	0.769	0.571	5.44204e-132	L+M	TNFAIP3	0.198
LCP12	2.17671e-139	0.397597	0.632	0.422	3.26006e-135	L+M	LCP1	0.21
PARP8	0	0.395062	0.438	0.131	0	L+M	PARP8	0.307
ARAP2	0	0.388836	0.348	0.098	0	L+M	ARAP2	0.25
GIMAP7	0	0.387263	0.44	0.151	0	L+M	GIMAP7	0.289
CD247	0	0.383143	0.362	0.018	0	L+M	CD247	0.344
ITGA4	1.17506e-254	0.382129	0.388	0.151	1.75989e-250	L+M	ITGA4	0.237
CYTOR2	0	0.378487	0.472	0.181	0	L+M	CYTOR	0.291
RNF2132	2.40799e-103	0.377455	0.641	0.467	3.60645e-99	L+M	RNF213	0.174
IKZF1	1.80597e-167	0.374388	0.553	0.318	2.70481e-163	L+M	IKZF1	0.235
EMB	2.01651e-213	0.372679	0.506	0.249	3.02012e-209	L+M	EMB	0.257
AHNAK2	6.00933e-263	0.364683	0.481	0.204	9.00017e-259	L+M	AHNAK	0.277
TENT5C	0	0.364638	0.294	0.023	0	L+M	TENT5C	0.271
PSMB93	3.5715e-140	0.363126	0.612	0.385	5.34904e-136	L+M	PSMB9	0.227
AES	1.11665e-236	0.361721	0.52	0.25	1.6724e-232	L+M	AES	0.27
SH2D2A	0	0.358896	0.295	0.025	0	L+M	SH2D2A	0.27
ZC3HAV1	5.48439e-166	0.358011	0.561	0.311	8.21396e-162	L+M	ZC3HAV1	0.25
CD6	0	0.356725	0.309	0.024	0	L+M	CD6	0.285
ICAM32	0	0.355913	0.399	0.098	0	L+M	ICAM3	0.301
RIPOR21	0	0.355465	0.294	0.043	0	L+M	RIPOR2	0.251
KMT2A	1.99147e-192	0.354328	0.404	0.184	2.98262e-188	L+M	KMT2A	0.22
CNN22	0	0.350642	0.386	0.112	0	L+M	CNN2	0.274
DOK21	1.87225e-299	0.345303	0.405	0.144	2.80408e-295	L+M	DOK2	0.261
FAM177A1	3.65226e-182	0.34484	0.532	0.283	5.47e-178	L+M	FAM177A1	0.249
PCSK7	3.28214e-224	0.344396	0.435	0.191	4.91566e-220	L+M	PCSK7	0.244
TSPYL2	5.46346e-298	0.340238	0.42	0.155	8.18263e-294	L+M	TSPYL2	0.265
S100A43	1.34403e-122	0.336992	0.728	0.544	2.01296e-118	L+M	S100A4	0.184
SLFN5	0	0.336975	0.341	0.097	0	L+M	SLFN5	0.244
PRDM1	1.70639e-168	0.336639	0.524	0.276	2.55566e-164	L+M	PRDM1	0.248
LBH	0	0.336219	0.324	0.034	0	L+M	LBH	0.29
BCL11B	0	0.335612	0.295	0.016	0	L+M	BCL11B	0.279
OCIAD2	0	0.332508	0.362	0.077	0	L+M	OCIAD2	0.285
PTPN7	1.1249e-284	0.330918	0.455	0.181	1.68477e-280	L+M	PTPN7	0.274
TBC1D10C	0	0.330748	0.359	0.061	0	L+M	TBC1D10C	0.298
CDC42SE2	5.80766e-237	0.329866	0.489	0.225	8.69814e-233	L+M	CDC42SE2	0.264
RASGRP1	0	0.328894	0.258	0.016	0	L+M	RASGRP1	0.242
GBP5	0	0.327609	0.352	0.094	0	L+M	GBP5	0.258
LAT	0	0.326421	0.314	0.033	0	L+M	LAT	0.281
TERF2IP	3.94132e-171	0.322598	0.557	0.318	5.90291e-167	L+M	TERF2IP	0.239
S100A81	2.02435e-40	0.589233	0.157	0.331	3.03187e-36	LowRead1	S100A8	-0.174
IFITM22	2.17955e-115	0.540308	0.189	0.533	3.26431e-111	LowRead1	IFITM2	-0.344
S100A91	4.38009e-32	0.492506	0.218	0.406	6.56006e-28	LowRead1	S100A9	-0.188
DDIT3	4.27512e-57	0.490392	0.091	0.269	6.40285e-53	LowRead1	DDIT3	-0.178
BCL2A12	3.6391e-56	0.454704	0.248	0.526	5.45029e-52	LowRead1	BCL2A1	-0.278
TSC22D31	6.28404e-30	0.349643	0.377	0.683	9.4116e-26	LowRead1	TSC22D3	-0.306
RGCC1	2.29776e-40	0.338653	0.19	0.388	3.44136e-36	LowRead1	RGCC	-0.198
CCL4L2	0	1.05758	0.69	0.47	0	M1-CCL3-4-IL1B	CCL4L2	0.22
CCL3L1	0	0.971906	0.635	0.428	0	M1-CCL3-4-IL1B	CCL3L1	0.207
CCL4	0	0.971674	0.828	0.641	0	M1-CCL3-4-IL1B	CCL4	0.187
CCL3	0	0.89959	0.847	0.686	0	M1-CCL3-4-IL1B	CCL3	0.161
CH25H	0	0.745303	0.536	0.326	0	M1-CCL3-4-IL1B	CH25H	0.21
IL1B	0	0.741924	0.719	0.548	0	M1-CCL3-4-IL1B	IL1B	0.171
NLRP3	0	0.684463	0.542	0.38	0	M1-CCL3-4-IL1B	NLRP3	0.162
CD83	0	0.615808	0.784	0.636	0	M1-CCL3-4-IL1B	CD83	0.148
OLR1	0	0.604019	0.764	0.624	0	M1-CCL3-4-IL1B	OLR1	0.14
CCL20	6.04766e-94	0.56335	0.257	0.19	9.05758e-90	M1-CCL3-4-IL1B	CCL20	0.067
BHLHE41	0	0.530902	0.525	0.382	0	M1-CCL3-4-IL1B	BHLHE41	0.143
KLF2	1.97888e-237	0.527858	0.538	0.442	2.96376e-233	M1-CCL3-4-IL1B	KLF2	0.096
NFKBID	0	0.515623	0.498	0.33	0	M1-CCL3-4-IL1B	NFKBID	0.168
KDM6B	0	0.513468	0.561	0.422	0	M1-CCL3-4-IL1B	KDM6B	0.139
REL	0	0.499773	0.706	0.65	0	M1-CCL3-4-IL1B	REL	0.056
SGK1	0	0.496829	0.804	0.717	0	M1-CCL3-4-IL1B	SGK1	0.087
PDGFB	0	0.49023	0.408	0.232	0	M1-CCL3-4-IL1B	PDGFB	0.176
SERPINB9	0	0.471002	0.591	0.47	0	M1-CCL3-4-IL1B	SERPINB9	0.121
NR4A3	0	0.469519	0.533	0.401	0	M1-CCL3-4-IL1B	NR4A3	0.132
CD69	0	0.45116	0.524	0.375	0	M1-CCL3-4-IL1B	CD69	0.149
KLF6	0	0.448556	0.805	0.756	0	M1-CCL3-4-IL1B	KLF6	0.049
B3GNT5	6.0742e-220	0.446958	0.393	0.295	9.09733e-216	M1-CCL3-4-IL1B	B3GNT5	0.098
GRASP	1.15047e-265	0.44666	0.435	0.323	1.72305e-261	M1-CCL3-4-IL1B	GRASP	0.112
EGR3	1.72822e-297	0.431621	0.275	0.157	2.58835e-293	M1-CCL3-4-IL1B	EGR3	0.118
NR4A1	0	0.424741	0.749	0.628	0	M1-CCL3-4-IL1B	NR4A1	0.121
NFKB1	7.75429e-208	0.424127	0.411	0.316	1.16136e-203	M1-CCL3-4-IL1B	NFKB1	0.095
ARID5B	1.01218e-203	0.422645	0.411	0.32	1.51594e-199	M1-CCL3-4-IL1B	ARID5B	0.091
PADI2	0	0.421202	0.431	0.3	0	M1-CCL3-4-IL1B	PADI2	0.131
ID2	0	0.418467	0.764	0.699	0	M1-CCL3-4-IL1B	ID2	0.065
RHOB	0	0.410224	0.741	0.669	0	M1-CCL3-4-IL1B	RHOB	0.072
RGS1	0	0.407802	0.884	0.826	0	M1-CCL3-4-IL1B	RGS1	0.058
NEDD9	4.41315e-279	0.406944	0.346	0.23	6.60957e-275	M1-CCL3-4-IL1B	NEDD9	0.116
BTG2	8.37551e-277	0.404734	0.643	0.56	1.2544e-272	M1-CCL3-4-IL1B	BTG2	0.083
TRIB1	0	0.404468	0.454	0.326	0	M1-CCL3-4-IL1B	TRIB1	0.128
RGS16	4.87925e-294	0.397864	0.371	0.237	7.30765e-290	M1-CCL3-4-IL1B	RGS16	0.134
DBI	1.41035e-164	0.397364	0.685	0.661	2.11228e-160	M1-CCL3-4-IL1B	DBI	0.024
ICAM1	5.98995e-182	0.395922	0.448	0.364	8.97115e-178	M1-CCL3-4-IL1B	ICAM1	0.084
ST6GAL1	1.84428e-98	0.391589	0.385	0.324	2.76218e-94	M1-CCL3-4-IL1B	ST6GAL1	0.061
PLEK	2.65787e-191	0.388507	0.581	0.518	3.98069e-187	M1-CCL3-4-IL1B	PLEK	0.063
BCL2A1	1.10374e-216	0.387482	0.589	0.497	1.65306e-212	M1-CCL3-4-IL1B	BCL2A1	0.092
PLK3	4.24546e-289	0.379832	0.531	0.426	6.35843e-285	M1-CCL3-4-IL1B	PLK3	0.105
SRGN	0	0.377644	0.893	0.891	0	M1-CCL3-4-IL1B	SRGN	0.002
GPR183	1.04319e-234	0.376594	0.652	0.565	1.56238e-230	M1-CCL3-4-IL1B	GPR183	0.087
NFKBIA	0	0.372646	0.818	0.782	0	M1-CCL3-4-IL1B	NFKBIA	0.036
EIF4E	3.27568e-97	0.357467	0.416	0.361	4.90599e-93	M1-CCL3-4-IL1B	EIF4E	0.055
CXCR4	2.60715e-198	0.355507	0.703	0.649	3.90473e-194	M1-CCL3-4-IL1B	CXCR4	0.054
ABL2	2.56329e-197	0.353122	0.431	0.336	3.83905e-193	M1-CCL3-4-IL1B	ABL2	0.095
RASGEF1B	7.50818e-208	0.350344	0.499	0.404	1.1245e-203	M1-CCL3-4-IL1B	RASGEF1B	0.095
SPTLC2	7.97003e-153	0.349512	0.492	0.431	1.19367e-148	M1-CCL3-4-IL1B	SPTLC2	0.061
OTUD1	1.10874e-153	0.345383	0.386	0.299	1.66056e-149	M1-CCL3-4-IL1B	OTUD1	0.087
ELL2	1.28168e-245	0.343769	0.627	0.544	1.91958e-241	M1-CCL3-4-IL1B	ELL2	0.083
HBEGF	9.27948e-89	0.341899	0.463	0.403	1.38979e-84	M1-CCL3-4-IL1B	HBEGF	0.06
RILPL2	2.95462e-207	0.340063	0.578	0.508	4.42513e-203	M1-CCL3-4-IL1B	RILPL2	0.07
IRF8	3.97582e-164	0.340047	0.475	0.402	5.95459e-160	M1-CCL3-4-IL1B	IRF8	0.073
FGD4	2.71358e-128	0.339193	0.438	0.376	4.06413e-124	M1-CCL3-4-IL1B	FGD4	0.062
TFRC	4.8162e-79	0.329553	0.407	0.349	7.21322e-75	M1-CCL3-4-IL1B	TFRC	0.058
ITGAX	8.61159e-107	0.323417	0.46	0.399	1.28976e-102	M1-CCL3-4-IL1B	ITGAX	0.061
SELENOP	0	0.686411	0.362	0.205	0	M2-CXCR4-ZFP36-MHC2Hi	SELENOP	0.157
CXCR41	0	0.536351	0.826	0.633	0	M2-CXCR4-ZFP36-MHC2Hi	CXCR4	0.193
HERPUD1	0	0.475571	0.88	0.693	0	M2-CXCR4-ZFP36-MHC2Hi	HERPUD1	0.187
ABHD5	3.38054e-227	0.465006	0.336	0.209	5.06303e-223	M2-CXCR4-ZFP36-MHC2Hi	ABHD5	0.127
CHMP1B	0	0.451411	0.629	0.446	0	M2-CXCR4-ZFP36-MHC2Hi	CHMP1B	0.183
HLA-DQA1	0	0.431415	0.839	0.646	0	M2-CXCR4-ZFP36-MHC2Hi	HLA-DQA1	0.193
ZFP36	0	0.429995	0.917	0.774	0	M2-CXCR4-ZFP36-MHC2Hi	ZFP36	0.143
HLA-DRB5	1.52007e-234	0.426312	0.687	0.556	2.27661e-230	M2-CXCR4-ZFP36-MHC2Hi	HLA-DRB5	0.131
JUNB	0	0.426067	0.932	0.792	0	M2-CXCR4-ZFP36-MHC2Hi	JUNB	0.14
CFD	0	0.421371	0.563	0.387	0	M2-CXCR4-ZFP36-MHC2Hi	CFD	0.176
HLA-DRB1	0	0.416569	0.952	0.852	0	M2-CXCR4-ZFP36-MHC2Hi	HLA-DRB1	0.1
CD74	0	0.41059	0.984	0.946	0	M2-CXCR4-ZFP36-MHC2Hi	CD74	0.038
HLA-DRA	0	0.408961	0.982	0.927	0	M2-CXCR4-ZFP36-MHC2Hi	HLA-DRA	0.055
RHOB1	0	0.408718	0.847	0.657	0	M2-CXCR4-ZFP36-MHC2Hi	RHOB	0.19
PLTP	1.14225e-246	0.398995	0.625	0.465	1.71074e-242	M2-CXCR4-ZFP36-MHC2Hi	PLTP	0.16
NR4A2	0	0.394968	0.797	0.566	0	M2-CXCR4-ZFP36-MHC2Hi	NR4A2	0.231
HLA-DPB1	0	0.393651	0.936	0.813	0	M2-CXCR4-ZFP36-MHC2Hi	HLA-DPB1	0.123
C1QC	0	0.392494	0.921	0.785	0	M2-CXCR4-ZFP36-MHC2Hi	C1QC	0.136
KLF4	0	0.384271	0.7	0.477	0	M2-CXCR4-ZFP36-MHC2Hi	KLF4	0.223
HLA-DPA1	0	0.383452	0.95	0.835	0	M2-CXCR4-ZFP36-MHC2Hi	HLA-DPA1	0.115
ZFAND5	0	0.380367	0.746	0.576	0	M2-CXCR4-ZFP36-MHC2Hi	ZFAND5	0.17
C1QB	0	0.379248	0.95	0.852	0	M2-CXCR4-ZFP36-MHC2Hi	C1QB	0.098
ZFP36L2	0	0.377261	0.834	0.67	0	M2-CXCR4-ZFP36-MHC2Hi	ZFP36L2	0.164
ATF3	0	0.374322	0.688	0.488	0	M2-CXCR4-ZFP36-MHC2Hi	ATF3	0.2
C1QA	0	0.372581	0.942	0.848	0	M2-CXCR4-ZFP36-MHC2Hi	C1QA	0.094
FOS	0	0.370402	0.958	0.857	0	M2-CXCR4-ZFP36-MHC2Hi	FOS	0.101
MAFB	0	0.364323	0.807	0.637	0	M2-CXCR4-ZFP36-MHC2Hi	MAFB	0.17
HLA-DQB1	0	0.357239	0.893	0.733	0	M2-CXCR4-ZFP36-MHC2Hi	HLA-DQB1	0.16
TMEM176B	0	0.354765	0.654	0.465	0	M2-CXCR4-ZFP36-MHC2Hi	TMEM176B	0.189
C5AR1	0	0.351248	0.746	0.544	0	M2-CXCR4-ZFP36-MHC2Hi	C5AR1	0.202
AZI2	1.58399e-260	0.347397	0.393	0.254	2.37234e-256	M2-CXCR4-ZFP36-MHC2Hi	AZI2	0.139
PDK4	5.90247e-202	0.34212	0.571	0.419	8.84013e-198	M2-CXCR4-ZFP36-MHC2Hi	PDK4	0.152
JUN	1.2355e-170	0.333143	0.872	0.756	1.85041e-166	M2-CXCR4-ZFP36-MHC2Hi	JUN	0.116
HLA-DMA	0	0.332189	0.858	0.687	0	M2-CXCR4-ZFP36-MHC2Hi	HLA-DMA	0.171
APOE	0	0.326619	0.977	0.916	0	M2-CXCR4-ZFP36-MHC2Hi	APOE	0.061
ZNF331	0	0.326162	0.746	0.56	0	M2-CXCR4-ZFP36-MHC2Hi	ZNF331	0.186
EIF4A3	1.46372e-237	0.326026	0.588	0.449	2.19221e-233	M2-CXCR4-ZFP36-MHC2Hi	EIF4A3	0.139
CXCL10	0	2.02749	0.408	0.092	0	M3-ISGhi	CXCL10	0.316
ISG15	0	1.82972	0.795	0.359	0	M3-ISGhi	ISG15	0.436
MX1	0	1.41087	0.716	0.281	0	M3-ISGhi	MX1	0.435
IFIT1	0	1.40683	0.472	0.105	0	M3-ISGhi	IFIT1	0.367
IFI6	0	1.37714	0.792	0.401	0	M3-ISGhi	IFI6	0.391
IFIT3	0	1.30625	0.561	0.158	0	M3-ISGhi	IFIT3	0.403
LY6E	0	1.22157	0.761	0.356	0	M3-ISGhi	LY6E	0.405
IFITM3	0	1.20057	0.833	0.536	0	M3-ISGhi	IFITM3	0.297
GBP1	0	1.17142	0.504	0.174	0	M3-ISGhi	GBP1	0.33
IFIT2	0	1.08605	0.464	0.148	0	M3-ISGhi	IFIT2	0.316
IFI27	1.10381e-108	1.05369	0.409	0.223	1.65318e-104	M3-ISGhi	IFI27	0.186
TNFSF10	6.91104e-229	0.957632	0.467	0.209	1.03507e-224	M3-ISGhi	TNFSF10	0.258
RSAD2	0	0.952847	0.409	0.076	0	M3-ISGhi	RSAD2	0.333
IFI44L	0	0.921269	0.683	0.3	0	M3-ISGhi	IFI44L	0.383
ISG20	3.18509e-230	0.899828	0.485	0.213	4.77031e-226	M3-ISGhi	ISG20	0.272
CALHM6	2.28558e-142	0.893892	0.544	0.329	3.42312e-138	M3-ISGhi	CALHM6	0.215
STAT1	0	0.891485	0.623	0.285	0	M3-ISGhi	STAT1	0.338
EPSTI1	0	0.828735	0.632	0.317	0	M3-ISGhi	EPSTI1	0.315
PARP14	1.92248e-199	0.825228	0.634	0.365	2.8793e-195	M3-ISGhi	PARP14	0.269
OAS1	1.0353e-303	0.798872	0.539	0.224	1.55056e-299	M3-ISGhi	OAS1	0.315
UBE2L6	1.18337e-256	0.778244	0.634	0.338	1.77234e-252	M3-ISGhi	UBE2L6	0.296
WARS	8.57686e-174	0.769899	0.437	0.204	1.28456e-169	M3-ISGhi	WARS	0.233
IRF7	1.33101e-288	0.767712	0.596	0.275	1.99346e-284	M3-ISGhi	IRF7	0.321
LAP3	2.46786e-218	0.761249	0.706	0.478	3.69612e-214	M3-ISGhi	LAP3	0.228
PSME2	2.11736e-203	0.753371	0.727	0.495	3.17116e-199	M3-ISGhi	PSME2	0.232
VAMP5	2.8817e-142	0.733074	0.528	0.308	4.31592e-138	M3-ISGhi	VAMP5	0.22
MX2	4.84705e-276	0.726668	0.521	0.223	7.25943e-272	M3-ISGhi	MX2	0.298
TNFSF13B	2.72034e-214	0.721928	0.681	0.442	4.07425e-210	M3-ISGhi	TNFSF13B	0.239
SAMD9L	3.45739e-289	0.716571	0.532	0.223	5.17814e-285	M3-ISGhi	SAMD9L	0.309
PSMB9	5.27807e-181	0.714183	0.63	0.387	7.90497e-177	M3-ISGhi	PSMB9	0.243
LGALS3BP	4.00924e-159	0.697879	0.603	0.357	6.00464e-155	M3-ISGhi	LGALS3BP	0.246
IFI35	5.54213e-258	0.688434	0.525	0.238	8.30045e-254	M3-ISGhi	IFI35	0.287
GBP4	1.14982e-206	0.666236	0.389	0.152	1.72208e-202	M3-ISGhi	GBP4	0.237
TAP1	1.17362e-193	0.656484	0.48	0.227	1.75774e-189	M3-ISGhi	TAP1	0.253
SERPING1	1.69398e-175	0.652627	0.53	0.276	2.53707e-171	M3-ISGhi	SERPING1	0.254
BST2	3.72439e-185	0.62859	0.747	0.585	5.57802e-181	M3-ISGhi	BST2	0.162
RARRES3	6.707e-132	0.611346	0.505	0.287	1.00451e-127	M3-ISGhi	RARRES3	0.218
IFI44	6.90746e-209	0.597082	0.534	0.258	1.03453e-204	M3-ISGhi	IFI44	0.276
NT5C3A	1.20853e-167	0.596555	0.339	0.137	1.81002e-163	M3-ISGhi	NT5C3A	0.202
HERC5	2.13401e-241	0.59427	0.346	0.114	3.19611e-237	M3-ISGhi	HERC5	0.232
EIF2AK2	9.43649e-201	0.592954	0.53	0.264	1.4133e-196	M3-ISGhi	EIF2AK2	0.266
RNF213	1.2107e-132	0.587941	0.681	0.468	1.81327e-128	M3-ISGhi	RNF213	0.213
IL4I1	3.37355e-151	0.583534	0.369	0.162	5.05257e-147	M3-ISGhi	IL4I1	0.207
XAF1	1.95277e-224	0.582405	0.541	0.255	2.92467e-220	M3-ISGhi	XAF1	0.286
SP110	3.88689e-181	0.566656	0.607	0.354	5.82139e-177	M3-ISGhi	SP110	0.253
OAS2	0	0.564306	0.429	0.137	0	M3-ISGhi	OAS2	0.292
OAS3	0	0.561816	0.381	0.103	0	M3-ISGhi	OAS3	0.278
IFITM2	2.83393e-125	0.521426	0.72	0.518	4.24437e-121	M3-ISGhi	IFITM2	0.202
OLFML3	3.97052e-68	0.4961	0.579	0.423	5.94664e-64	M3-ISGhi	OLFML3	0.156
C1QC1	8.70035e-99	0.494073	0.882	0.803	1.30305e-94	M3-ISGhi	C1QC	0.079
PARP9	2.23998e-190	0.492395	0.463	0.21	3.35481e-186	M3-ISGhi	PARP9	0.253
TYMP	2.92445e-130	0.486514	0.816	0.689	4.37995e-126	M3-ISGhi	TYMP	0.127
CMPK2	0	0.484149	0.35	0.08	0	M3-ISGhi	CMPK2	0.27
USP18	0	0.457451	0.276	0.057	0	M3-ISGhi	USP18	0.219
HLA-DQA11	4.13748e-71	0.45443	0.791	0.672	6.1967e-67	M3-ISGhi	HLA-DQA1	0.119
RABGAP1L	3.57882e-137	0.451278	0.442	0.225	5.36e-133	M3-ISGhi	RABGAP1L	0.217
OASL	2.2419e-270	0.446012	0.314	0.088	3.35769e-266	M3-ISGhi	OASL	0.226
IFIH1	3.97145e-202	0.444381	0.313	0.106	5.94804e-198	M3-ISGhi	IFIH1	0.207
C1QB1	2.27346e-103	0.422715	0.919	0.865	3.40496e-99	M3-ISGhi	C1QB	0.054
B2M	6.93089e-189	0.422215	0.982	0.97	1.03804e-184	M3-ISGhi	B2M	0.012
TRIM22	5.1946e-122	0.412812	0.567	0.352	7.77995e-118	M3-ISGhi	TRIM22	0.215
HLA-C	5.88748e-98	0.409973	0.881	0.798	8.81767e-94	M3-ISGhi	HLA-C	0.083
HLA-A	3.8894e-80	0.407494	0.902	0.854	5.82515e-76	M3-ISGhi	HLA-A	0.048
GIMAP4	1.32511e-83	0.403269	0.543	0.354	1.98462e-79	M3-ISGhi	GIMAP4	0.189
C1QA1	6.1846e-97	0.401408	0.919	0.861	9.26268e-93	M3-ISGhi	C1QA	0.058
PPA1	1.45658e-67	0.392624	0.513	0.351	2.18151e-63	M3-ISGhi	PPA1	0.162
SSB	2.84459e-85	0.390026	0.579	0.409	4.26035e-81	M3-ISGhi	SSB	0.17
NUB1	3.19867e-70	0.390007	0.405	0.246	4.79065e-66	M3-ISGhi	NUB1	0.159
DDX60L	9.60496e-105	0.384616	0.327	0.156	1.43854e-100	M3-ISGhi	DDX60L	0.171
SAMD9	8.8304e-105	0.363964	0.337	0.163	1.32253e-100	M3-ISGhi	SAMD9	0.174
MNDA	3.00617e-58	0.363084	0.583	0.427	4.50234e-54	M3-ISGhi	MNDA	0.156
STAT2	7.25956e-120	0.360111	0.394	0.194	1.08726e-115	M3-ISGhi	STAT2	0.2
DRAP1	2.83908e-88	0.352068	0.706	0.55	4.25209e-84	M3-ISGhi	DRAP1	0.156
APOL6	6.09106e-104	0.350724	0.391	0.205	9.12258e-100	M3-ISGhi	APOL6	0.186
SIGLEC1	3.11303e-176	0.348291	0.337	0.125	4.66238e-172	M3-ISGhi	SIGLEC1	0.212
NMI	1.45735e-117	0.347183	0.402	0.206	2.18267e-113	M3-ISGhi	NMI	0.196
SPATS2L	9.36257e-78	0.34561	0.475	0.297	1.40223e-73	M3-ISGhi	SPATS2L	0.178
ANKRD22	2.34621e-61	0.343393	0.414	0.259	3.51393e-57	M3-ISGhi	ANKRD22	0.155
EBI3	4.05456e-65	0.342568	0.374	0.219	6.07252e-61	M3-ISGhi	EBI3	0.155
PSMB8	6.19598e-82	0.336486	0.576	0.401	9.27972e-78	M3-ISGhi	PSMB8	0.175
CD741	4.97192e-62	0.331136	0.971	0.951	7.44644e-58	M3-ISGhi	CD74	0.02
HLA-DRB11	3.18529e-66	0.327677	0.916	0.866	4.77061e-62	M3-ISGhi	HLA-DRB1	0.05
PSMA4	1.16267e-64	0.324355	0.566	0.412	1.74133e-60	M3-ISGhi	PSMA4	0.154
PSME1	1.42532e-59	0.322667	0.645	0.509	2.1347e-55	M3-ISGhi	PSME1	0.136
BAG3	0	1.42046	0.634	0.253	0	M4-HSPhi	BAG3	0.381
ZFAND2A	0	1.32654	0.549	0.235	0	M4-HSPhi	ZFAND2A	0.314
DNAJB1	0	1.31275	0.882	0.615	0	M4-HSPhi	DNAJB1	0.267
HSP90AA1	0	1.11552	0.953	0.861	0	M4-HSPhi	HSP90AA1	0.092
DNAJA4	0	1.0648	0.479	0.173	0	M4-HSPhi	DNAJA4	0.306
IER5	0	0.966282	0.662	0.429	0	M4-HSPhi	IER5	0.233
SERPINH1	0	0.889719	0.278	0.098	0	M4-HSPhi	SERPINH1	0.18
DNAJB4	0	0.804783	0.369	0.152	0	M4-HSPhi	DNAJB4	0.217
HSP90AB1	0	0.766057	0.877	0.772	0	M4-HSPhi	HSP90AB1	0.105
DNAJA1	0	0.744644	0.701	0.574	0	M4-HSPhi	DNAJA1	0.127
CACYBP	0	0.717872	0.523	0.345	0	M4-HSPhi	CACYBP	0.178
CHORDC1	0	0.689875	0.438	0.258	0	M4-HSPhi	CHORDC1	0.18
JUN1	0	0.686475	0.871	0.764	0	M4-HSPhi	JUN	0.107
UBC	0	0.6408	0.927	0.903	0	M4-HSPhi	UBC	0.024
PPP1R15A	0	0.618834	0.789	0.686	0	M4-HSPhi	PPP1R15A	0.103
UBB	4.01788e-275	0.568171	0.804	0.74	6.01758e-271	M4-HSPhi	UBB	0.064
FKBP4	6.72294e-235	0.563869	0.298	0.157	1.00689e-230	M4-HSPhi	FKBP4	0.141
RGS161	8.31386e-69	0.55694	0.342	0.261	1.24517e-64	M4-HSPhi	RGS16	0.081
DNAJB6	2.36925e-183	0.550462	0.632	0.544	3.54843e-179	M4-HSPhi	DNAJB6	0.088
EGR1	1.79081e-178	0.508854	0.59	0.451	2.68209e-174	M4-HSPhi	EGR1	0.139
MRPL18	1.56055e-139	0.477735	0.401	0.293	2.33723e-135	M4-HSPhi	MRPL18	0.108
TRA2B	9.58987e-132	0.472599	0.637	0.56	1.43628e-127	M4-HSPhi	TRA2B	0.077
TCP1	3.82618e-140	0.471002	0.444	0.338	5.73048e-136	M4-HSPhi	TCP1	0.106
GADD45B	2.59179e-156	0.457483	0.75	0.685	3.88173e-152	M4-HSPhi	GADD45B	0.065
NR4A11	1.23069e-212	0.440146	0.756	0.646	1.8432e-208	M4-HSPhi	NR4A1	0.11
CCL31	3.01717e-110	0.403046	0.784	0.718	4.51881e-106	M4-HSPhi	CCL3	0.066
IER3	3.13174e-126	0.396969	0.748	0.684	4.69041e-122	M4-HSPhi	IER3	0.064
CLK1	3.71075e-122	0.395736	0.556	0.472	5.55759e-118	M4-HSPhi	CLK1	0.084
IER2	5.72726e-100	0.393896	0.722	0.67	8.57772e-96	M4-HSPhi	IER2	0.052
G0S2	2.32627e-13	0.369622	0.35	0.322	3.48405e-09	M4-HSPhi	G0S2	0.028
CKS2	5.23408e-22	0.362007	0.332	0.297	7.83908e-18	M4-HSPhi	CKS2	0.035
RGS2	9.71708e-81	0.359406	0.691	0.635	1.45533e-76	M4-HSPhi	RGS2	0.056
CCL3L11	4.15462e-48	0.359382	0.533	0.471	6.22238e-44	M4-HSPhi	CCL3L1	0.062
CCL41	2.77554e-92	0.356827	0.747	0.678	4.15692e-88	M4-HSPhi	CCL4	0.069
IFRD1	4.0544e-38	0.344292	0.491	0.453	6.07227e-34	M4-HSPhi	IFRD1	0.038
CXCL8	5.10332e-59	0.342358	0.529	0.45	7.64325e-55	M4-HSPhi	CXCL8	0.079
BCAS2	3.05852e-22	0.322135	0.368	0.339	4.58075e-18	M4-HSPhi	BCAS2	0.029
PLCG2	4.37163e-172	1.04688	0.398	0.29	6.5474e-168	M5-CX3CR1-TMEM119-ADORA3	PLCG2	0.108
FCGBP	1.96716e-171	0.546446	0.606	0.482	2.94622e-167	M5-CX3CR1-TMEM119-ADORA3	FCGBP	0.124
SORL1	0	0.523696	0.628	0.471	0	M5-CX3CR1-TMEM119-ADORA3	SORL1	0.157
GPR34	0	0.475462	0.666	0.526	0	M5-CX3CR1-TMEM119-ADORA3	GPR34	0.14
MEF2C	0	0.475035	0.673	0.546	0	M5-CX3CR1-TMEM119-ADORA3	MEF2C	0.127
CX3CR1	7.88617e-281	0.471084	0.425	0.263	1.18111e-276	M5-CX3CR1-TMEM119-ADORA3	CX3CR1	0.162
N4BP2L2	1.3081e-141	0.432844	0.555	0.47	1.95914e-137	M5-CX3CR1-TMEM119-ADORA3	N4BP2L2	0.085
LPAR6	1.99143e-200	0.431055	0.529	0.407	2.98256e-196	M5-CX3CR1-TMEM119-ADORA3	LPAR6	0.122
TGFBR1	3.85849e-221	0.427154	0.421	0.288	5.77886e-217	M5-CX3CR1-TMEM119-ADORA3	TGFBR1	0.133
CSF1R	0	0.422787	0.757	0.653	0	M5-CX3CR1-TMEM119-ADORA3	CSF1R	0.104
IFNGR1	2.17744e-195	0.422068	0.654	0.575	3.26116e-191	M5-CX3CR1-TMEM119-ADORA3	IFNGR1	0.079
A2M	0	0.415266	0.745	0.616	0	M5-CX3CR1-TMEM119-ADORA3	A2M	0.129
FCGR1A	2.09656e-211	0.410803	0.672	0.58	3.14002e-207	M5-CX3CR1-TMEM119-ADORA3	FCGR1A	0.092
LUC7L3	7.36043e-154	0.407705	0.48	0.375	1.10237e-149	M5-CX3CR1-TMEM119-ADORA3	LUC7L3	0.105
PALD1	6.66432e-153	0.403381	0.409	0.297	9.98116e-149	M5-CX3CR1-TMEM119-ADORA3	PALD1	0.112
C3	0	0.402687	0.837	0.704	0	M5-CX3CR1-TMEM119-ADORA3	C3	0.133
HTRA1	6.38122e-197	0.400798	0.535	0.41	9.55715e-193	M5-CX3CR1-TMEM119-ADORA3	HTRA1	0.125
BIN1	4.65053e-169	0.400622	0.607	0.511	6.96509e-165	M5-CX3CR1-TMEM119-ADORA3	BIN1	0.096
MARCH1	1.43176e-162	0.393283	0.43	0.321	2.14434e-158	M5-CX3CR1-TMEM119-ADORA3	MARCH1	0.109
ARHGAP24	6.4372e-118	0.386824	0.425	0.328	9.64099e-114	M5-CX3CR1-TMEM119-ADORA3	ARHGAP24	0.097
PNISR	2.54308e-148	0.380017	0.595	0.511	3.80877e-144	M5-CX3CR1-TMEM119-ADORA3	PNISR	0.084
ADORA3	1.17605e-190	0.378937	0.459	0.331	1.76137e-186	M5-CX3CR1-TMEM119-ADORA3	ADORA3	0.128
APMAP	3.20947e-155	0.377657	0.481	0.381	4.80682e-151	M5-CX3CR1-TMEM119-ADORA3	APMAP	0.1
MEF2A	7.33929e-164	0.374826	0.592	0.503	1.09921e-159	M5-CX3CR1-TMEM119-ADORA3	MEF2A	0.089
SLCO2B1	5.76426e-241	0.371829	0.645	0.527	8.63313e-237	M5-CX3CR1-TMEM119-ADORA3	SLCO2B1	0.118
GLDN	3.85938e-107	0.3694	0.313	0.219	5.78019e-103	M5-CX3CR1-TMEM119-ADORA3	GLDN	0.094
SLC1A3	8.50795e-179	0.364427	0.706	0.607	1.27424e-174	M5-CX3CR1-TMEM119-ADORA3	SLC1A3	0.099
PLD4	3.92737e-157	0.364345	0.542	0.428	5.88202e-153	M5-CX3CR1-TMEM119-ADORA3	PLD4	0.114
FRMD4A	6.41696e-100	0.357342	0.447	0.36	9.61069e-96	M5-CX3CR1-TMEM119-ADORA3	FRMD4A	0.087
LTC4S	1.66827e-149	0.355138	0.576	0.471	2.49857e-145	M5-CX3CR1-TMEM119-ADORA3	LTC4S	0.105
FEZ2	3.17385e-152	0.354003	0.474	0.376	4.75347e-148	M5-CX3CR1-TMEM119-ADORA3	FEZ2	0.098
TREM2	1.0019e-234	0.353866	0.767	0.667	1.50055e-230	M5-CX3CR1-TMEM119-ADORA3	TREM2	0.1
FCGR3A	9.42882e-239	0.352594	0.761	0.679	1.41215e-234	M5-CX3CR1-TMEM119-ADORA3	FCGR3A	0.082
FSCN1	1.97962e-129	0.352376	0.397	0.296	2.96487e-125	M5-CX3CR1-TMEM119-ADORA3	FSCN1	0.101
TMEM119	4.1328e-193	0.352264	0.38	0.247	6.18969e-189	M5-CX3CR1-TMEM119-ADORA3	TMEM119	0.133
OLFML31	2.02951e-138	0.350079	0.519	0.416	3.0396e-134	M5-CX3CR1-TMEM119-ADORA3	OLFML3	0.103
WASF2	2.81438e-181	0.349217	0.601	0.518	4.2151e-177	M5-CX3CR1-TMEM119-ADORA3	WASF2	0.083
ITPR2	3.04598e-90	0.346807	0.422	0.347	4.56196e-86	M5-CX3CR1-TMEM119-ADORA3	ITPR2	0.075
GIMAP41	7.72852e-175	0.346773	0.463	0.346	1.1575e-170	M5-CX3CR1-TMEM119-ADORA3	GIMAP4	0.117
IL6ST	3.57487e-108	0.346573	0.396	0.305	5.35409e-104	M5-CX3CR1-TMEM119-ADORA3	IL6ST	0.091
IFI44L1	3.04103e-53	0.346185	0.364	0.304	4.55456e-49	M5-CX3CR1-TMEM119-ADORA3	IFI44L	0.06
MAF	1.88871e-103	0.344743	0.405	0.321	2.82871e-99	M5-CX3CR1-TMEM119-ADORA3	MAF	0.084
ATM	3.65063e-122	0.344665	0.392	0.298	5.46755e-118	M5-CX3CR1-TMEM119-ADORA3	ATM	0.094
PLXDC2	2.3501e-174	0.342899	0.67	0.588	3.51974e-170	M5-CX3CR1-TMEM119-ADORA3	PLXDC2	0.082
INPP5D	5.64846e-101	0.342341	0.452	0.37	8.45971e-97	M5-CX3CR1-TMEM119-ADORA3	INPP5D	0.082
CHD9	1.82808e-119	0.33835	0.473	0.389	2.73792e-115	M5-CX3CR1-TMEM119-ADORA3	CHD9	0.084
POU2F2	3.00412e-107	0.338298	0.427	0.338	4.49927e-103	M5-CX3CR1-TMEM119-ADORA3	POU2F2	0.089
ENTPD1	6.33986e-127	0.337924	0.464	0.37	9.49521e-123	M5-CX3CR1-TMEM119-ADORA3	ENTPD1	0.094
RNF2131	9.53536e-80	0.335897	0.532	0.466	1.42811e-75	M5-CX3CR1-TMEM119-ADORA3	RNF213	0.066
SELPLG	3.59728e-87	0.33493	0.429	0.353	5.38765e-83	M5-CX3CR1-TMEM119-ADORA3	SELPLG	0.076
RASSF4	2.0154e-122	0.334223	0.56	0.487	3.01847e-118	M5-CX3CR1-TMEM119-ADORA3	RASSF4	0.073
FGD2	2.5995e-97	0.329607	0.329	0.244	3.89327e-93	M5-CX3CR1-TMEM119-ADORA3	FGD2	0.085
NUDT3	5.39366e-127	0.328919	0.367	0.271	8.07809e-123	M5-CX3CR1-TMEM119-ADORA3	NUDT3	0.096
EVL	6.09316e-141	0.328122	0.534	0.436	9.12572e-137	M5-CX3CR1-TMEM119-ADORA3	EVL	0.098
MS4A6A	5.30965e-181	0.328103	0.748	0.667	7.95226e-177	M5-CX3CR1-TMEM119-ADORA3	MS4A6A	0.081
ADGRG1	1.64497e-111	0.328103	0.327	0.23	2.46368e-107	M5-CX3CR1-TMEM119-ADORA3	ADGRG1	0.097
ITM2B	0	0.327713	0.874	0.822	0	M5-CX3CR1-TMEM119-ADORA3	ITM2B	0.052
ST6GAL11	2.50548e-164	0.326103	0.44	0.325	3.75246e-160	M5-CX3CR1-TMEM119-ADORA3	ST6GAL1	0.115
SOCS6	3.11321e-102	0.324987	0.362	0.273	4.66266e-98	M5-CX3CR1-TMEM119-ADORA3	SOCS6	0.089
TMIGD3	2.2316e-78	0.324527	0.485	0.423	3.34227e-74	M5-CX3CR1-TMEM119-ADORA3	TMIGD3	0.062
CD84	1.34717e-104	0.323597	0.52	0.443	2.01766e-100	M5-CX3CR1-TMEM119-ADORA3	CD84	0.077
ADAP2	3.53306e-122	0.323417	0.57	0.497	5.29147e-118	M5-CX3CR1-TMEM119-ADORA3	ADAP2	0.073
LGALS3	0	1.26509	0.708	0.341	0	M6-GPNMB-APOE-CD68-Mphage	LGALS3	0.367
GPNMB	0	1.16186	0.762	0.397	0	M6-GPNMB-APOE-CD68-Mphage	GPNMB	0.365
CTSD	0	0.963144	0.875	0.731	0	M6-GPNMB-APOE-CD68-Mphage	CTSD	0.144
LGMN	0	0.903614	0.703	0.488	0	M6-GPNMB-APOE-CD68-Mphage	LGMN	0.215
ACP5	0	0.894215	0.366	0.133	0	M6-GPNMB-APOE-CD68-Mphage	ACP5	0.233
CD9	0	0.774163	0.663	0.389	0	M6-GPNMB-APOE-CD68-Mphage	CD9	0.274
LIPA	0	0.764836	0.696	0.449	0	M6-GPNMB-APOE-CD68-Mphage	LIPA	0.247
APOC1	0	0.750108	0.918	0.828	0	M6-GPNMB-APOE-CD68-Mphage	APOC1	0.09
GCHFR	5.78704e-300	0.744971	0.329	0.126	8.66724e-296	M6-GPNMB-APOE-CD68-Mphage	GCHFR	0.203
FTL	0	0.740494	1	0.995	0	M6-GPNMB-APOE-CD68-Mphage	FTL	0.005
NUPR1	0	0.701778	0.604	0.321	0	M6-GPNMB-APOE-CD68-Mphage	NUPR1	0.283
FABP5	1.96566e-194	0.602762	0.595	0.38	2.94397e-190	M6-GPNMB-APOE-CD68-Mphage	FABP5	0.215
CD68	1.21183e-302	0.578994	0.807	0.707	1.81496e-298	M6-GPNMB-APOE-CD68-Mphage	CD68	0.1
CAPG	2.24937e-295	0.577947	0.794	0.648	3.36888e-291	M6-GPNMB-APOE-CD68-Mphage	CAPG	0.146
OTOA	0	0.564852	0.345	0.073	0	M6-GPNMB-APOE-CD68-Mphage	OTOA	0.272
APOE1	4.04829e-292	0.557046	0.97	0.923	6.06313e-288	M6-GPNMB-APOE-CD68-Mphage	APOE	0.047
CFD1	1.33265e-129	0.553782	0.573	0.405	1.99592e-125	M6-GPNMB-APOE-CD68-Mphage	CFD	0.168
CTSL	1.11653e-208	0.548772	0.76	0.576	1.67223e-204	M6-GPNMB-APOE-CD68-Mphage	CTSL	0.184
CD63	4.79117e-307	0.546646	0.855	0.796	7.17573e-303	M6-GPNMB-APOE-CD68-Mphage	CD63	0.059
LGALS1	1.18876e-297	0.541536	0.834	0.644	1.78041e-293	M6-GPNMB-APOE-CD68-Mphage	LGALS1	0.19
GM2A	8.05986e-245	0.536561	0.547	0.316	1.20713e-240	M6-GPNMB-APOE-CD68-Mphage	GM2A	0.231
ASAH1	1.9309e-286	0.522521	0.792	0.676	2.89191e-282	M6-GPNMB-APOE-CD68-Mphage	ASAH1	0.116
DNASE2	1.88674e-251	0.521875	0.641	0.423	2.82577e-247	M6-GPNMB-APOE-CD68-Mphage	DNASE2	0.218
ALDH1A1	4.28444e-288	0.512254	0.35	0.138	6.41681e-284	M6-GPNMB-APOE-CD68-Mphage	ALDH1A1	0.212
SDS	2.47996e-211	0.509011	0.346	0.153	3.71423e-207	M6-GPNMB-APOE-CD68-Mphage	SDS	0.193
PSAP	8.56671e-292	0.5056	0.91	0.851	1.28304e-287	M6-GPNMB-APOE-CD68-Mphage	PSAP	0.059
PRDX1	2.10004e-252	0.502337	0.781	0.629	3.14522e-248	M6-GPNMB-APOE-CD68-Mphage	PRDX1	0.152
GRN	1.11395e-223	0.49921	0.818	0.71	1.66837e-219	M6-GPNMB-APOE-CD68-Mphage	GRN	0.108
PLA2G7	0	0.496448	0.342	0.107	0	M6-GPNMB-APOE-CD68-Mphage	PLA2G7	0.235
VAT1	0	0.486724	0.405	0.145	0	M6-GPNMB-APOE-CD68-Mphage	VAT1	0.26
CSTB	1.31663e-257	0.48507	0.79	0.636	1.97191e-253	M6-GPNMB-APOE-CD68-Mphage	CSTB	0.154
ANXA2	1.75804e-220	0.466851	0.674	0.447	2.63302e-216	M6-GPNMB-APOE-CD68-Mphage	ANXA2	0.227
CYP27A1	1.02022e-281	0.460914	0.265	0.088	1.52798e-277	M6-GPNMB-APOE-CD68-Mphage	CYP27A1	0.177
PLD3	4.41814e-155	0.459997	0.642	0.465	6.61706e-151	M6-GPNMB-APOE-CD68-Mphage	PLD3	0.177
CPM	8.30596e-155	0.458263	0.628	0.438	1.24398e-150	M6-GPNMB-APOE-CD68-Mphage	CPM	0.19
LPL	4.06545e-162	0.430493	0.341	0.168	6.08883e-158	M6-GPNMB-APOE-CD68-Mphage	LPL	0.173
IGSF6	2.80859e-100	0.415099	0.617	0.478	4.20642e-96	M6-GPNMB-APOE-CD68-Mphage	IGSF6	0.139
UCP2	2.33071e-152	0.413804	0.657	0.473	3.4907e-148	M6-GPNMB-APOE-CD68-Mphage	UCP2	0.184
CTSZ	1.64055e-77	0.412778	0.726	0.628	2.45705e-73	M6-GPNMB-APOE-CD68-Mphage	CTSZ	0.098
NPL	4.4973e-213	0.412499	0.556	0.334	6.73561e-209	M6-GPNMB-APOE-CD68-Mphage	NPL	0.222
BLVRB	1.17064e-150	0.402473	0.537	0.349	1.75326e-146	M6-GPNMB-APOE-CD68-Mphage	BLVRB	0.188
CTSA	4.14117e-143	0.393058	0.584	0.415	6.20223e-139	M6-GPNMB-APOE-CD68-Mphage	CTSA	0.169
BRI3	4.4912e-105	0.392327	0.618	0.463	6.72647e-101	M6-GPNMB-APOE-CD68-Mphage	BRI3	0.155
MGST3	6.01992e-181	0.388839	0.66	0.483	9.01603e-177	M6-GPNMB-APOE-CD68-Mphage	MGST3	0.177
FUCA1	5.66062e-110	0.379663	0.427	0.271	8.47792e-106	M6-GPNMB-APOE-CD68-Mphage	FUCA1	0.156
AKR1B1	5.26294e-118	0.37913	0.68	0.535	7.88231e-114	M6-GPNMB-APOE-CD68-Mphage	AKR1B1	0.145
IQGAP2	8.92391e-139	0.37064	0.362	0.193	1.33653e-134	M6-GPNMB-APOE-CD68-Mphage	IQGAP2	0.169
DAB2	2.71297e-141	0.366308	0.64	0.455	4.06322e-137	M6-GPNMB-APOE-CD68-Mphage	DAB2	0.185
CTSB	1.38458e-164	0.366298	0.905	0.851	2.07368e-160	M6-GPNMB-APOE-CD68-Mphage	CTSB	0.054
TSPAN4	1.65571e-180	0.356728	0.318	0.148	2.47976e-176	M6-GPNMB-APOE-CD68-Mphage	TSPAN4	0.17
TREM21	7.07368e-96	0.354577	0.772	0.673	1.05942e-91	M6-GPNMB-APOE-CD68-Mphage	TREM2	0.099
S100A11	1.86769e-214	0.348849	0.887	0.841	2.79724e-210	M6-GPNMB-APOE-CD68-Mphage	S100A11	0.046
TXN	4.48331e-159	0.346292	0.622	0.431	6.71466e-155	M6-GPNMB-APOE-CD68-Mphage	TXN	0.191
MGLL	1.28986e-281	0.338301	0.332	0.125	1.93183e-277	M6-GPNMB-APOE-CD68-Mphage	MGLL	0.207
GYPC	7.53498e-95	0.337122	0.663	0.514	1.12851e-90	M6-GPNMB-APOE-CD68-Mphage	GYPC	0.149
RNASE1	0	1.38854	0.587	0.252	0	M7-VCAN-GPNMB-ANGPTL4-GlycoHi	RNASE1	0.335
CSTB1	0	1.3464	0.815	0.625	0	M7-VCAN-GPNMB-ANGPTL4-GlycoHi	CSTB	0.19
NUPR11	0	1.25999	0.568	0.31	0	M7-VCAN-GPNMB-ANGPTL4-GlycoHi	NUPR1	0.258
S100A10	0	1.17332	0.787	0.436	0	M7-VCAN-GPNMB-ANGPTL4-GlycoHi	S100A10	0.351
MIF	0	1.16595	0.673	0.404	0	M7-VCAN-GPNMB-ANGPTL4-GlycoHi	MIF	0.269
VCAN	0	1.15919	0.439	0.124	0	M7-VCAN-GPNMB-ANGPTL4-GlycoHi	VCAN	0.315
LGALS11	0	1.07193	0.852	0.632	0	M7-VCAN-GPNMB-ANGPTL4-GlycoHi	LGALS1	0.22
FN1	8.07179e-229	1.07151	0.294	0.152	1.20891e-224	M7-VCAN-GPNMB-ANGPTL4-GlycoHi	FN1	0.142
ADM	0	1.01058	0.499	0.219	0	M7-VCAN-GPNMB-ANGPTL4-GlycoHi	ADM	0.28
HMOX1	7.02951e-299	0.976678	0.715	0.605	1.05281e-294	M7-VCAN-GPNMB-ANGPTL4-GlycoHi	HMOX1	0.11
ANGPTL4	0	0.969835	0.29	0.043	0	M7-VCAN-GPNMB-ANGPTL4-GlycoHi	ANGPTL4	0.247
VIM	0	0.966062	0.899	0.677	0	M7-VCAN-GPNMB-ANGPTL4-GlycoHi	VIM	0.222
GAPDH	0	0.955375	0.934	0.848	0	M7-VCAN-GPNMB-ANGPTL4-GlycoHi	GAPDH	0.086
GPNMB1	0	0.919348	0.703	0.384	0	M7-VCAN-GPNMB-ANGPTL4-GlycoHi	GPNMB	0.319
ERO1A	0	0.858319	0.461	0.169	0	M7-VCAN-GPNMB-ANGPTL4-GlycoHi	ERO1A	0.292
BNIP3	0	0.850594	0.392	0.078	0	M7-VCAN-GPNMB-ANGPTL4-GlycoHi	BNIP3	0.314
CXCL3	1.42111e-307	0.821967	0.279	0.121	2.12839e-303	M7-VCAN-GPNMB-ANGPTL4-GlycoHi	CXCL3	0.158
SNHG12	4.50181e-188	0.797556	0.404	0.266	6.74237e-184	M7-VCAN-GPNMB-ANGPTL4-GlycoHi	SNHG12	0.138
S100A6	0	0.790525	0.745	0.489	0	M7-VCAN-GPNMB-ANGPTL4-GlycoHi	S100A6	0.256
ADAM8	0	0.75306	0.362	0.085	0	M7-VCAN-GPNMB-ANGPTL4-GlycoHi	ADAM8	0.277
ENO1	0	0.750189	0.787	0.621	0	M7-VCAN-GPNMB-ANGPTL4-GlycoHi	ENO1	0.166
LGALS31	0	0.746087	0.579	0.335	0	M7-VCAN-GPNMB-ANGPTL4-GlycoHi	LGALS3	0.244
HK2	0	0.726622	0.398	0.167	0	M7-VCAN-GPNMB-ANGPTL4-GlycoHi	HK2	0.231
PLIN2	0	0.722602	0.747	0.572	0	M7-VCAN-GPNMB-ANGPTL4-GlycoHi	PLIN2	0.175
SCD	0	0.718859	0.378	0.138	0	M7-VCAN-GPNMB-ANGPTL4-GlycoHi	SCD	0.24
TGFBI	0	0.718428	0.622	0.425	0	M7-VCAN-GPNMB-ANGPTL4-GlycoHi	TGFBI	0.197
FTL1	0	0.707816	0.998	0.995	0	M7-VCAN-GPNMB-ANGPTL4-GlycoHi	FTL	0.003
C15orf48	0	0.705643	0.341	0.136	0	M7-VCAN-GPNMB-ANGPTL4-GlycoHi	C15orf48	0.205
NDRG1	0	0.704582	0.387	0.152	0	M7-VCAN-GPNMB-ANGPTL4-GlycoHi	NDRG1	0.235
LDHA	0	0.692938	0.767	0.6	0	M7-VCAN-GPNMB-ANGPTL4-GlycoHi	LDHA	0.167
SLC16A10	0	0.686932	0.401	0.146	0	M7-VCAN-GPNMB-ANGPTL4-GlycoHi	SLC16A10	0.255
CTSL1	1.80586e-292	0.680085	0.682	0.575	2.70464e-288	M7-VCAN-GPNMB-ANGPTL4-GlycoHi	CTSL	0.107
FABP51	3.44315e-214	0.648306	0.526	0.376	5.15681e-210	M7-VCAN-GPNMB-ANGPTL4-GlycoHi	FABP5	0.15
PPDPF	0	0.648053	0.645	0.458	0	M7-VCAN-GPNMB-ANGPTL4-GlycoHi	PPDPF	0.187
ALDOA	4.66326e-215	0.645818	0.421	0.26	6.98416e-211	M7-VCAN-GPNMB-ANGPTL4-GlycoHi	ALDOA	0.161
ATF5	0	0.642289	0.458	0.242	0	M7-VCAN-GPNMB-ANGPTL4-GlycoHi	ATF5	0.216
P4HB	0	0.641867	0.657	0.494	0	M7-VCAN-GPNMB-ANGPTL4-GlycoHi	P4HB	0.163
FCGR2B	0	0.634194	0.452	0.239	0	M7-VCAN-GPNMB-ANGPTL4-GlycoHi	FCGR2B	0.213
ANXA21	0	0.624289	0.672	0.436	0	M7-VCAN-GPNMB-ANGPTL4-GlycoHi	ANXA2	0.236
PKM	0	0.615283	0.757	0.577	0	M7-VCAN-GPNMB-ANGPTL4-GlycoHi	PKM	0.18
SEC61G	4.45449e-284	0.605937	0.637	0.479	6.67149e-280	M7-VCAN-GPNMB-ANGPTL4-GlycoHi	SEC61G	0.158
BNIP3L	0	0.60136	0.611	0.425	0	M7-VCAN-GPNMB-ANGPTL4-GlycoHi	BNIP3L	0.186
GPI	0	0.598701	0.503	0.269	0	M7-VCAN-GPNMB-ANGPTL4-GlycoHi	GPI	0.234
TPI1	0	0.592271	0.775	0.636	0	M7-VCAN-GPNMB-ANGPTL4-GlycoHi	TPI1	0.139
CTSD1	0	0.588425	0.832	0.728	0	M7-VCAN-GPNMB-ANGPTL4-GlycoHi	CTSD	0.104
PGK1	0	0.583323	0.705	0.552	0	M7-VCAN-GPNMB-ANGPTL4-GlycoHi	PGK1	0.153
TIMP1	0	0.578975	0.645	0.463	0	M7-VCAN-GPNMB-ANGPTL4-GlycoHi	TIMP1	0.182
CXCL81	2.23859e-144	0.577417	0.577	0.445	3.35274e-140	M7-VCAN-GPNMB-ANGPTL4-GlycoHi	CXCL8	0.132
SPP1	1.0186e-279	0.569037	0.941	0.914	1.52556e-275	M7-VCAN-GPNMB-ANGPTL4-GlycoHi	SPP1	0.027
MRC1	3.51615e-208	0.555351	0.329	0.183	5.26614e-204	M7-VCAN-GPNMB-ANGPTL4-GlycoHi	MRC1	0.146
BCAT1	0	0.554354	0.403	0.168	0	M7-VCAN-GPNMB-ANGPTL4-GlycoHi	BCAT1	0.235
PMP22	0	0.553509	0.431	0.21	0	M7-VCAN-GPNMB-ANGPTL4-GlycoHi	PMP22	0.221
RALA	0	0.550549	0.398	0.208	0	M7-VCAN-GPNMB-ANGPTL4-GlycoHi	RALA	0.19
P4HA1	0	0.548628	0.464	0.26	0	M7-VCAN-GPNMB-ANGPTL4-GlycoHi	P4HA1	0.204
SLC2A3	1.36667e-264	0.545473	0.608	0.444	2.04686e-260	M7-VCAN-GPNMB-ANGPTL4-GlycoHi	SLC2A3	0.164
FAM162A	1.38216e-239	0.54354	0.454	0.3	2.07006e-235	M7-VCAN-GPNMB-ANGPTL4-GlycoHi	FAM162A	0.154
ABCA1	0	0.536453	0.542	0.353	0	M7-VCAN-GPNMB-ANGPTL4-GlycoHi	ABCA1	0.189
PLP2	0	0.531132	0.421	0.211	0	M7-VCAN-GPNMB-ANGPTL4-GlycoHi	PLP2	0.21
NRP1	0	0.525418	0.38	0.18	0	M7-VCAN-GPNMB-ANGPTL4-GlycoHi	NRP1	0.2
EIF4EBP1	1.29101e-236	0.524605	0.492	0.33	1.93355e-232	M7-VCAN-GPNMB-ANGPTL4-GlycoHi	EIF4EBP1	0.162
MMP19	5.63485e-227	0.521858	0.311	0.162	8.43931e-223	M7-VCAN-GPNMB-ANGPTL4-GlycoHi	MMP19	0.149
LSP1	0	0.516203	0.548	0.352	0	M7-VCAN-GPNMB-ANGPTL4-GlycoHi	LSP1	0.196
HSP90B1	3.74363e-107	0.516185	0.665	0.601	5.60684e-103	M7-VCAN-GPNMB-ANGPTL4-GlycoHi	HSP90B1	0.064
CXCL2	3.20147e-191	0.503399	0.309	0.169	4.79484e-187	M7-VCAN-GPNMB-ANGPTL4-GlycoHi	CXCL2	0.14
TXN1	1.0221e-286	0.502729	0.601	0.424	1.5308e-282	M7-VCAN-GPNMB-ANGPTL4-GlycoHi	TXN	0.177
EMP3	0	0.502595	0.648	0.431	0	M7-VCAN-GPNMB-ANGPTL4-GlycoHi	EMP3	0.217
CTSB1	1.29448e-303	0.4978	0.88	0.85	1.93874e-299	M7-VCAN-GPNMB-ANGPTL4-GlycoHi	CTSB	0.03
FTH1	9.73401e-226	0.485917	0.993	0.978	1.45786e-221	M7-VCAN-GPNMB-ANGPTL4-GlycoHi	FTH1	0.015
ANXA1	3.38965e-203	0.467618	0.61	0.458	5.07668e-199	M7-VCAN-GPNMB-ANGPTL4-GlycoHi	ANXA1	0.152
VKORC1	1.65246e-181	0.463031	0.456	0.315	2.47489e-177	M7-VCAN-GPNMB-ANGPTL4-GlycoHi	VKORC1	0.141
CD44	0	0.46125	0.591	0.373	0	M7-VCAN-GPNMB-ANGPTL4-GlycoHi	CD44	0.218
SH3BGRL3	2.54004e-269	0.451928	0.817	0.723	3.80423e-265	M7-VCAN-GPNMB-ANGPTL4-GlycoHi	SH3BGRL3	0.094
C4orf3	3.74875e-213	0.45145	0.602	0.472	5.6145e-209	M7-VCAN-GPNMB-ANGPTL4-GlycoHi	C4orf3	0.13
GLUL	6.12768e-244	0.447984	0.832	0.77	9.17743e-240	M7-VCAN-GPNMB-ANGPTL4-GlycoHi	GLUL	0.062
FLNA	0	0.443968	0.369	0.169	0	M7-VCAN-GPNMB-ANGPTL4-GlycoHi	FLNA	0.2
RAB13	1.33845e-264	0.442705	0.435	0.263	2.0046e-260	M7-VCAN-GPNMB-ANGPTL4-GlycoHi	RAB13	0.172
F13A1	5.81144e-71	0.43857	0.329	0.247	8.7038e-67	M7-VCAN-GPNMB-ANGPTL4-GlycoHi	F13A1	0.082
ARL4C	4.10771e-243	0.436591	0.467	0.292	6.15212e-239	M7-VCAN-GPNMB-ANGPTL4-GlycoHi	ARL4C	0.175
FBP1	1.1165e-159	0.435418	0.383	0.253	1.67219e-155	M7-VCAN-GPNMB-ANGPTL4-GlycoHi	FBP1	0.13
GSTO1	6.35718e-264	0.431887	0.657	0.524	9.52115e-260	M7-VCAN-GPNMB-ANGPTL4-GlycoHi	GSTO1	0.133
UPP1	5.99263e-301	0.42291	0.485	0.297	8.97516e-297	M7-VCAN-GPNMB-ANGPTL4-GlycoHi	UPP1	0.188
FNDC3B	0	0.420551	0.411	0.217	0	M7-VCAN-GPNMB-ANGPTL4-GlycoHi	FNDC3B	0.194
GBE1	0	0.415856	0.277	0.101	0	M7-VCAN-GPNMB-ANGPTL4-GlycoHi	GBE1	0.176
METRNL	0	0.41298	0.533	0.326	0	M7-VCAN-GPNMB-ANGPTL4-GlycoHi	METRNL	0.207
MANF	4.1925e-40	0.407589	0.308	0.25	6.2791e-36	M7-VCAN-GPNMB-ANGPTL4-GlycoHi	MANF	0.058
RGCC	2.64406e-132	0.407322	0.512	0.369	3.96001e-128	M7-VCAN-GPNMB-ANGPTL4-GlycoHi	RGCC	0.143
THBD	4.96114e-180	0.405008	0.321	0.186	7.4303e-176	M7-VCAN-GPNMB-ANGPTL4-GlycoHi	THBD	0.135
CYSTM1	8.64841e-256	0.400365	0.321	0.165	1.29527e-251	M7-VCAN-GPNMB-ANGPTL4-GlycoHi	CYSTM1	0.156
BRI31	4.79247e-214	0.395256	0.607	0.456	7.17769e-210	M7-VCAN-GPNMB-ANGPTL4-GlycoHi	BRI3	0.151
PDIA4	3.40023e-106	0.393607	0.378	0.273	5.09252e-102	M7-VCAN-GPNMB-ANGPTL4-GlycoHi	PDIA4	0.105
HPCAL1	7.35369e-269	0.392898	0.356	0.192	1.10136e-264	M7-VCAN-GPNMB-ANGPTL4-GlycoHi	HPCAL1	0.164
APLP2	1.23724e-227	0.391292	0.682	0.581	1.85301e-223	M7-VCAN-GPNMB-ANGPTL4-GlycoHi	APLP2	0.101
VAT11	0	0.389542	0.316	0.141	0	M7-VCAN-GPNMB-ANGPTL4-GlycoHi	VAT1	0.175
ASPH	1.429e-241	0.379731	0.348	0.192	2.14021e-237	M7-VCAN-GPNMB-ANGPTL4-GlycoHi	ASPH	0.156
CLEC5A	1.76377e-237	0.377224	0.358	0.198	2.6416e-233	M7-VCAN-GPNMB-ANGPTL4-GlycoHi	CLEC5A	0.16
SDC2	0	0.373841	0.264	0.107	0	M7-VCAN-GPNMB-ANGPTL4-GlycoHi	SDC2	0.157
THBS1	1.95596e-105	0.366582	0.294	0.187	2.92944e-101	M7-VCAN-GPNMB-ANGPTL4-GlycoHi	THBS1	0.107
SSR4	1.83492e-48	0.365694	0.659	0.604	2.74816e-44	M7-VCAN-GPNMB-ANGPTL4-GlycoHi	SSR4	0.055
BLVRB1	1.05811e-127	0.359889	0.465	0.347	1.58473e-123	M7-VCAN-GPNMB-ANGPTL4-GlycoHi	BLVRB	0.118
HCFC1R1	5.27453e-194	0.359857	0.361	0.217	7.89966e-190	M7-VCAN-GPNMB-ANGPTL4-GlycoHi	HCFC1R1	0.144
ANKH	1.91446e-233	0.358165	0.345	0.191	2.86729e-229	M7-VCAN-GPNMB-ANGPTL4-GlycoHi	ANKH	0.154
S100A4	2.02965e-172	0.355902	0.684	0.537	3.03981e-168	M7-VCAN-GPNMB-ANGPTL4-GlycoHi	S100A4	0.147
ZNF385A	7.29477e-147	0.351669	0.399	0.275	1.09254e-142	M7-VCAN-GPNMB-ANGPTL4-GlycoHi	ZNF385A	0.124
LMAN1	2.53333e-118	0.349936	0.414	0.3	3.79417e-114	M7-VCAN-GPNMB-ANGPTL4-GlycoHi	LMAN1	0.114
PGAM1	9.40355e-155	0.342854	0.527	0.393	1.40837e-150	M7-VCAN-GPNMB-ANGPTL4-GlycoHi	PGAM1	0.134
FAM20C	1.5768e-225	0.34125	0.329	0.181	2.36157e-221	M7-VCAN-GPNMB-ANGPTL4-GlycoHi	FAM20C	0.148
TAGLN2	1.98875e-195	0.327018	0.573	0.419	2.97855e-191	M7-VCAN-GPNMB-ANGPTL4-GlycoHi	TAGLN2	0.154
PLD31	4.39609e-122	0.324731	0.57	0.464	6.58402e-118	M7-VCAN-GPNMB-ANGPTL4-GlycoHi	PLD3	0.106
S100A8	0	2.88752	0.807	0.308	0	Mono-FCN1-S100A8-9-VCAN	S100A8	0.499
S100A9	0	2.76054	0.854	0.383	0	Mono-FCN1-S100A8-9-VCAN	S100A9	0.471
FCN1	0	2.17105	0.612	0.031	0	Mono-FCN1-S100A8-9-VCAN	FCN1	0.581
TIMP11	0	1.99668	0.815	0.467	0	Mono-FCN1-S100A8-9-VCAN	TIMP1	0.348
S100A12	0	1.93458	0.388	0.015	0	Mono-FCN1-S100A8-9-VCAN	S100A12	0.373
LYZ	0	1.85602	0.858	0.444	0	Mono-FCN1-S100A8-9-VCAN	LYZ	0.414
S100A61	0	1.76685	0.896	0.499	0	Mono-FCN1-S100A8-9-VCAN	S100A6	0.397
VCAN1	0	1.74057	0.685	0.134	0	Mono-FCN1-S100A8-9-VCAN	VCAN	0.551
THBS11	0	1.63625	0.606	0.182	0	Mono-FCN1-S100A8-9-VCAN	THBS1	0.424
S100A41	0	1.51194	0.867	0.539	0	Mono-FCN1-S100A8-9-VCAN	S100A4	0.328
RETN	0	1.44227	0.375	0.064	0	Mono-FCN1-S100A8-9-VCAN	RETN	0.311
IL1R2	0	1.38923	0.347	0.059	0	Mono-FCN1-S100A8-9-VCAN	IL1R2	0.288
CD52	0	1.37964	0.598	0.127	0	Mono-FCN1-S100A8-9-VCAN	CD52	0.471
EREG	0	1.35587	0.431	0.071	0	Mono-FCN1-S100A8-9-VCAN	EREG	0.36
AREG	0	1.31808	0.626	0.248	0	Mono-FCN1-S100A8-9-VCAN	AREG	0.378
SMIM25	0	1.1603	0.542	0.105	0	Mono-FCN1-S100A8-9-VCAN	SMIM25	0.437
S100A101	0	1.14361	0.844	0.455	0	Mono-FCN1-S100A8-9-VCAN	S100A10	0.389
APOBEC3A	0	1.12792	0.283	0.021	0	Mono-FCN1-S100A8-9-VCAN	APOBEC3A	0.262
MCEMP1	0	1.06125	0.386	0.035	0	Mono-FCN1-S100A8-9-VCAN	MCEMP1	0.351
CXCL21	6.72912e-243	1.0538	0.415	0.173	1.00782e-238	Mono-FCN1-S100A8-9-VCAN	CXCL2	0.242
FLNA1	0	1.04228	0.605	0.172	0	Mono-FCN1-S100A8-9-VCAN	FLNA	0.433
CXCL31	2.85613e-142	1.03802	0.297	0.13	4.27762e-138	Mono-FCN1-S100A8-9-VCAN	CXCL3	0.167
CFP	0	1.01904	0.391	0.026	0	Mono-FCN1-S100A8-9-VCAN	CFP	0.365
UPP11	0	0.988186	0.693	0.301	0	Mono-FCN1-S100A8-9-VCAN	UPP1	0.392
CSTA	0	0.919343	0.65	0.325	0	Mono-FCN1-S100A8-9-VCAN	CSTA	0.325
CD300E	0	0.91455	0.348	0.036	0	Mono-FCN1-S100A8-9-VCAN	CD300E	0.312
SH3BGRL31	0	0.914355	0.882	0.726	0	Mono-FCN1-S100A8-9-VCAN	SH3BGRL3	0.156
STXBP2	0	0.905182	0.656	0.342	0	Mono-FCN1-S100A8-9-VCAN	STXBP2	0.314
CD441	0	0.889929	0.739	0.381	0	Mono-FCN1-S100A8-9-VCAN	CD44	0.358
IFITM21	2.28901e-168	0.867482	0.702	0.517	3.42825e-164	Mono-FCN1-S100A8-9-VCAN	IFITM2	0.185
NCF2	0	0.856196	0.621	0.27	0	Mono-FCN1-S100A8-9-VCAN	NCF2	0.351
TKT	0	0.852118	0.696	0.459	0	Mono-FCN1-S100A8-9-VCAN	TKT	0.237
CD55	0	0.848364	0.638	0.323	0	Mono-FCN1-S100A8-9-VCAN	CD55	0.315
MARCO	0	0.838753	0.325	0.066	0	Mono-FCN1-S100A8-9-VCAN	MARCO	0.259
SERPINA1	2.25697e-292	0.832771	0.76	0.533	3.38027e-288	Mono-FCN1-S100A8-9-VCAN	SERPINA1	0.227
FBP11	6.03836e-193	0.832722	0.473	0.258	9.04365e-189	Mono-FCN1-S100A8-9-VCAN	FBP1	0.215
EMP31	0	0.831715	0.784	0.439	0	Mono-FCN1-S100A8-9-VCAN	EMP3	0.345
LCP1	0	0.81777	0.706	0.42	0	Mono-FCN1-S100A8-9-VCAN	LCP1	0.286
CLEC4E	0	0.809779	0.466	0.167	0	Mono-FCN1-S100A8-9-VCAN	CLEC4E	0.299
RIPOR2	0	0.79088	0.306	0.044	0	Mono-FCN1-S100A8-9-VCAN	RIPOR2	0.262
CTSS	5.86587e-300	0.785619	0.825	0.682	8.78532e-296	Mono-FCN1-S100A8-9-VCAN	CTSS	0.143
ANXA11	5.87457e-293	0.783576	0.731	0.462	8.79834e-289	Mono-FCN1-S100A8-9-VCAN	ANXA1	0.269
FGR	0	0.780844	0.594	0.235	0	Mono-FCN1-S100A8-9-VCAN	FGR	0.359
JAML	0	0.78002	0.432	0.121	0	Mono-FCN1-S100A8-9-VCAN	JAML	0.311
AQP9	0	0.770323	0.381	0.073	0	Mono-FCN1-S100A8-9-VCAN	AQP9	0.308
PPIF	2.32056e-189	0.764598	0.549	0.327	3.4755e-185	Mono-FCN1-S100A8-9-VCAN	PPIF	0.222
ANPEP	0	0.761805	0.337	0.051	0	Mono-FCN1-S100A8-9-VCAN	ANPEP	0.286
TREM1	0	0.759918	0.573	0.271	0	Mono-FCN1-S100A8-9-VCAN	TREM1	0.302
LILRA5	0	0.745734	0.333	0.038	0	Mono-FCN1-S100A8-9-VCAN	LILRA5	0.295
THBD1	1.03813e-254	0.745274	0.44	0.19	1.55481e-250	Mono-FCN1-S100A8-9-VCAN	THBD	0.25
C15orf481	1.36308e-148	0.73785	0.325	0.149	2.04148e-144	Mono-FCN1-S100A8-9-VCAN	C15orf48	0.176
EHD1	0	0.725575	0.331	0.091	0	Mono-FCN1-S100A8-9-VCAN	EHD1	0.24
PLBD1	2.01226e-243	0.720158	0.456	0.223	3.01377e-239	Mono-FCN1-S100A8-9-VCAN	PLBD1	0.233
LILRB2	0	0.718843	0.461	0.179	0	Mono-FCN1-S100A8-9-VCAN	LILRB2	0.282
CD48	0	0.713485	0.52	0.225	0	Mono-FCN1-S100A8-9-VCAN	CD48	0.295
WARS1	1.68713e-221	0.710414	0.432	0.202	2.52682e-217	Mono-FCN1-S100A8-9-VCAN	WARS	0.23
FPR2	0	0.698743	0.309	0.052	0	Mono-FCN1-S100A8-9-VCAN	FPR2	0.257
LSP11	0	0.698492	0.692	0.359	0	Mono-FCN1-S100A8-9-VCAN	LSP1	0.333
RBP7	0	0.696629	0.306	0.076	0	Mono-FCN1-S100A8-9-VCAN	RBP7	0.23
GLIPR2	0	0.689242	0.516	0.193	0	Mono-FCN1-S100A8-9-VCAN	GLIPR2	0.323
VIM1	0	0.688728	0.924	0.69	0	Mono-FCN1-S100A8-9-VCAN	VIM	0.234
CXCL82	5.03589e-34	0.68819	0.543	0.454	7.54226e-30	Mono-FCN1-S100A8-9-VCAN	CXCL8	0.089
AHNAK	3.19186e-301	0.680755	0.48	0.205	4.78045e-297	Mono-FCN1-S100A8-9-VCAN	AHNAK	0.275
SERPINB1	1.07103e-231	0.680212	0.709	0.5	1.60409e-227	Mono-FCN1-S100A8-9-VCAN	SERPINB1	0.209
MNDA1	7.79967e-155	0.661009	0.606	0.425	1.16816e-150	Mono-FCN1-S100A8-9-VCAN	MNDA	0.181
CD93	2.58491e-292	0.660578	0.508	0.232	3.87142e-288	Mono-FCN1-S100A8-9-VCAN	CD93	0.276
ICAM3	0	0.654916	0.396	0.099	0	Mono-FCN1-S100A8-9-VCAN	ICAM3	0.297
G0S21	1.2239e-115	0.649673	0.509	0.317	1.83303e-111	Mono-FCN1-S100A8-9-VCAN	G0S2	0.192
AGTRAP	1.90612e-294	0.645247	0.51	0.239	2.8548e-290	Mono-FCN1-S100A8-9-VCAN	AGTRAP	0.271
MYO1G	0	0.643537	0.472	0.16	0	Mono-FCN1-S100A8-9-VCAN	MYO1G	0.312
PRELID1	1.2376e-247	0.640139	0.688	0.455	1.85355e-243	Mono-FCN1-S100A8-9-VCAN	PRELID1	0.233
NAMPT	1.42808e-245	0.639466	0.838	0.651	2.13884e-241	Mono-FCN1-S100A8-9-VCAN	NAMPT	0.187
SLC2A31	3.04534e-169	0.630624	0.656	0.452	4.561e-165	Mono-FCN1-S100A8-9-VCAN	SLC2A3	0.204
SLC25A37	1.86272e-188	0.63051	0.667	0.447	2.7898e-184	Mono-FCN1-S100A8-9-VCAN	SLC25A37	0.22
MPEG1	0	0.629407	0.44	0.173	0	Mono-FCN1-S100A8-9-VCAN	MPEG1	0.267
VAMP51	2.94463e-115	0.620218	0.479	0.308	4.41017e-111	Mono-FCN1-S100A8-9-VCAN	VAMP5	0.171
LST1	4.94142e-158	0.618896	0.779	0.643	7.40077e-154	Mono-FCN1-S100A8-9-VCAN	LST1	0.136
COTL1	1.11554e-245	0.617526	0.812	0.656	1.67075e-241	Mono-FCN1-S100A8-9-VCAN	COTL1	0.156
LTA4H	3.5465e-271	0.616316	0.517	0.259	5.3116e-267	Mono-FCN1-S100A8-9-VCAN	LTA4H	0.258
CFD2	6.53673e-177	0.603914	0.641	0.405	9.79006e-173	Mono-FCN1-S100A8-9-VCAN	CFD	0.236
GBP11	4.48306e-37	0.59954	0.265	0.18	6.71428e-33	Mono-FCN1-S100A8-9-VCAN	GBP1	0.085
CD36	0	0.59384	0.3	0.041	0	Mono-FCN1-S100A8-9-VCAN	CD36	0.259
ZEB2	3.80562e-158	0.593041	0.683	0.509	5.69967e-154	Mono-FCN1-S100A8-9-VCAN	ZEB2	0.174
PLP21	4.39563e-253	0.59246	0.478	0.222	6.58334e-249	Mono-FCN1-S100A8-9-VCAN	PLP2	0.256
EMILIN2	1.03707e-302	0.588016	0.437	0.177	1.55322e-298	Mono-FCN1-S100A8-9-VCAN	EMILIN2	0.26
IRF1	9.17758e-90	0.585895	0.427	0.275	1.37453e-85	Mono-FCN1-S100A8-9-VCAN	IRF1	0.152
ANXA22	0	0.58333	0.74	0.448	0	Mono-FCN1-S100A8-9-VCAN	ANXA2	0.292
TAGLN21	1.60986e-229	0.582511	0.67	0.425	2.41109e-225	Mono-FCN1-S100A8-9-VCAN	TAGLN2	0.245
PLAC8	1.67563e-142	0.580761	0.333	0.158	2.50959e-138	Mono-FCN1-S100A8-9-VCAN	PLAC8	0.175
PGD	4.4502e-228	0.579797	0.496	0.255	6.66506e-224	Mono-FCN1-S100A8-9-VCAN	PGD	0.241
SOD2	1.76191e-166	0.575396	0.769	0.58	2.63881e-162	Mono-FCN1-S100A8-9-VCAN	SOD2	0.189
FN11	7.84679e-87	0.57533	0.298	0.161	1.17521e-82	Mono-FCN1-S100A8-9-VCAN	FN1	0.137
MXD1	1.65098e-280	0.568936	0.549	0.267	2.47267e-276	Mono-FCN1-S100A8-9-VCAN	MXD1	0.282
H3F3A	0	0.567476	0.899	0.807	0	Mono-FCN1-S100A8-9-VCAN	H3F3A	0.092
IFITM31	1.35192e-59	0.565152	0.647	0.54	2.02477e-55	Mono-FCN1-S100A8-9-VCAN	IFITM3	0.107
CYTOR	2.49514e-226	0.559517	0.415	0.185	3.73697e-222	Mono-FCN1-S100A8-9-VCAN	CYTOR	0.23
BLVRB2	2.7156e-193	0.558208	0.579	0.35	4.06715e-189	Mono-FCN1-S100A8-9-VCAN	BLVRB	0.229
GK	2.82325e-123	0.554585	0.536	0.353	4.22838e-119	Mono-FCN1-S100A8-9-VCAN	GK	0.183
PLAUR	2.84303e-146	0.552102	0.823	0.673	4.258e-142	Mono-FCN1-S100A8-9-VCAN	PLAUR	0.15
ARL4A	3.6067e-142	0.549484	0.477	0.289	5.40175e-138	Mono-FCN1-S100A8-9-VCAN	ARL4A	0.188
CARD16	6.40244e-181	0.543762	0.551	0.334	9.58894e-177	Mono-FCN1-S100A8-9-VCAN	CARD16	0.217
GCA	6.52917e-164	0.543152	0.521	0.316	9.77873e-160	Mono-FCN1-S100A8-9-VCAN	GCA	0.205
GMFG	4.29259e-199	0.539942	0.754	0.569	6.42901e-195	Mono-FCN1-S100A8-9-VCAN	GMFG	0.185
ALDOA1	3.08464e-86	0.539864	0.425	0.27	4.61987e-82	Mono-FCN1-S100A8-9-VCAN	ALDOA	0.155
TALDO1	7.20034e-189	0.539631	0.676	0.464	1.07839e-184	Mono-FCN1-S100A8-9-VCAN	TALDO1	0.212
LILRB3	8.34841e-302	0.533721	0.464	0.195	1.25034e-297	Mono-FCN1-S100A8-9-VCAN	LILRB3	0.269
GABARAP	2.06976e-20	0.527807	0.513	0.457	3.09989e-16	Mono-FCN1-S100A8-9-VCAN	GABARAP	0.056
C19orf38	5.36404e-257	0.521405	0.371	0.146	8.03373e-253	Mono-FCN1-S100A8-9-VCAN	C19orf38	0.225
GSTP1	2.88606e-179	0.515679	0.75	0.596	4.32245e-175	Mono-FCN1-S100A8-9-VCAN	GSTP1	0.154
BCL2A11	2.25647e-191	0.513872	0.746	0.51	3.37951e-187	Mono-FCN1-S100A8-9-VCAN	BCL2A1	0.236
SELL	9.75266e-192	0.510585	0.288	0.112	1.46066e-187	Mono-FCN1-S100A8-9-VCAN	SELL	0.176
TSPO	2.53489e-146	0.51014	0.804	0.672	3.79651e-142	Mono-FCN1-S100A8-9-VCAN	TSPO	0.132
EFHD2	2.69271e-176	0.510085	0.607	0.401	4.03288e-172	Mono-FCN1-S100A8-9-VCAN	EFHD2	0.206
POLE4	3.89288e-199	0.504332	0.451	0.227	5.83037e-195	Mono-FCN1-S100A8-9-VCAN	POLE4	0.224
SNX10	1.85643e-196	0.501797	0.513	0.284	2.78037e-192	Mono-FCN1-S100A8-9-VCAN	SNX10	0.229
ASGR1	0	0.498852	0.346	0.095	0	Mono-FCN1-S100A8-9-VCAN	ASGR1	0.251
GSTO11	3.40349e-186	0.498658	0.721	0.529	5.0974e-182	Mono-FCN1-S100A8-9-VCAN	GSTO1	0.192
ACTN1	5.72843e-252	0.496115	0.39	0.158	8.57947e-248	Mono-FCN1-S100A8-9-VCAN	ACTN1	0.232
CLEC12A	0	0.495127	0.331	0.102	0	Mono-FCN1-S100A8-9-VCAN	CLEC12A	0.229
UBE2D1	7.11697e-179	0.494755	0.421	0.215	1.06591e-174	Mono-FCN1-S100A8-9-VCAN	UBE2D1	0.206
ADGRE5	1.13695e-159	0.490293	0.451	0.245	1.70281e-155	Mono-FCN1-S100A8-9-VCAN	ADGRE5	0.206
STK17B	1.86268e-182	0.488756	0.551	0.324	2.78974e-178	Mono-FCN1-S100A8-9-VCAN	STK17B	0.227
CCL201	2.57002e-32	0.4885	0.29	0.202	3.84912e-28	Mono-FCN1-S100A8-9-VCAN	CCL20	0.088
RAC2	2.01919e-214	0.48499	0.512	0.264	3.02414e-210	Mono-FCN1-S100A8-9-VCAN	RAC2	0.248
ELOB	2.88787e-171	0.483564	0.771	0.592	4.32516e-167	Mono-FCN1-S100A8-9-VCAN	ELOB	0.179
GPCPD1	1.27298e-198	0.482733	0.523	0.291	1.90655e-194	Mono-FCN1-S100A8-9-VCAN	GPCPD1	0.232
VASP	1.67759e-166	0.480145	0.581	0.381	2.51252e-162	Mono-FCN1-S100A8-9-VCAN	VASP	0.2
SH3BP5	2.86762e-203	0.478883	0.427	0.203	4.29483e-199	Mono-FCN1-S100A8-9-VCAN	SH3BP5	0.224
PTPRE	4.18422e-163	0.478226	0.618	0.414	6.2667e-159	Mono-FCN1-S100A8-9-VCAN	PTPRE	0.204
LGALS32	2.6974e-218	0.476209	0.628	0.348	4.03989e-214	Mono-FCN1-S100A8-9-VCAN	LGALS3	0.28
JARID2	6.78512e-154	0.469779	0.369	0.184	1.01621e-149	Mono-FCN1-S100A8-9-VCAN	JARID2	0.185
CSGALNACT2	2.09075e-252	0.469177	0.383	0.155	3.13132e-248	Mono-FCN1-S100A8-9-VCAN	CSGALNACT2	0.228
TXNIP	4.36316e-81	0.46901	0.659	0.521	6.53471e-77	Mono-FCN1-S100A8-9-VCAN	TXNIP	0.138
FTH11	4.68849e-228	0.46638	0.996	0.979	7.02196e-224	Mono-FCN1-S100A8-9-VCAN	FTH1	0.017
PNP	3.5017e-142	0.460118	0.379	0.198	5.2445e-138	Mono-FCN1-S100A8-9-VCAN	PNP	0.181
AGFG1	1.07811e-201	0.457547	0.397	0.186	1.61468e-197	Mono-FCN1-S100A8-9-VCAN	AGFG1	0.211
IL1RN	3.14559e-74	0.454406	0.302	0.17	4.71115e-70	Mono-FCN1-S100A8-9-VCAN	IL1RN	0.132
MYL6	2.67927e-215	0.453928	0.886	0.791	4.01274e-211	Mono-FCN1-S100A8-9-VCAN	MYL6	0.095
DOK2	5.21583e-301	0.4493	0.395	0.145	7.81175e-297	Mono-FCN1-S100A8-9-VCAN	DOK2	0.25
IVNS1ABP	8.73566e-128	0.448797	0.522	0.331	1.30834e-123	Mono-FCN1-S100A8-9-VCAN	IVNS1ABP	0.191
IRAK3	2.98178e-175	0.445562	0.534	0.31	4.46581e-171	Mono-FCN1-S100A8-9-VCAN	IRAK3	0.224
BTG1	1.15709e-134	0.442426	0.852	0.756	1.73297e-130	Mono-FCN1-S100A8-9-VCAN	BTG1	0.096
FKBP1A	3.68564e-152	0.442126	0.669	0.481	5.51998e-148	Mono-FCN1-S100A8-9-VCAN	FKBP1A	0.188
CLIC1	5.59356e-174	0.441735	0.818	0.688	8.37747e-170	Mono-FCN1-S100A8-9-VCAN	CLIC1	0.13
CCDC69	2.08893e-305	0.441361	0.333	0.109	3.12858e-301	Mono-FCN1-S100A8-9-VCAN	CCDC69	0.224
MYD88	2.33482e-207	0.438907	0.406	0.188	3.49686e-203	Mono-FCN1-S100A8-9-VCAN	MYD88	0.218
CNN2	2.13372e-281	0.43863	0.339	0.114	3.19567e-277	Mono-FCN1-S100A8-9-VCAN	CNN2	0.225
C1orf162	8.66379e-126	0.436973	0.747	0.608	1.29758e-121	Mono-FCN1-S100A8-9-VCAN	C1orf162	0.139
AP1S2	3.43017e-140	0.436062	0.556	0.361	5.13737e-136	Mono-FCN1-S100A8-9-VCAN	AP1S2	0.195
DDX21	5.32911e-112	0.435505	0.609	0.445	7.98141e-108	Mono-FCN1-S100A8-9-VCAN	DDX21	0.164
OAZ1	4.2617e-252	0.435114	0.897	0.818	6.38275e-248	Mono-FCN1-S100A8-9-VCAN	OAZ1	0.079
PLIN21	1.63828e-48	0.432543	0.709	0.585	2.45365e-44	Mono-FCN1-S100A8-9-VCAN	PLIN2	0.124
PFDN5	3.57446e-195	0.429737	0.865	0.759	5.35346e-191	Mono-FCN1-S100A8-9-VCAN	PFDN5	0.106
BRI32	2.93241e-112	0.429184	0.631	0.465	4.39187e-108	Mono-FCN1-S100A8-9-VCAN	BRI3	0.166
SMCHD1	1.45075e-103	0.429156	0.425	0.26	2.17279e-99	Mono-FCN1-S100A8-9-VCAN	SMCHD1	0.165
TYMP1	4.66187e-139	0.429087	0.821	0.687	6.98208e-135	Mono-FCN1-S100A8-9-VCAN	TYMP	0.134
MBD2	4.30049e-162	0.429015	0.411	0.213	6.44085e-158	Mono-FCN1-S100A8-9-VCAN	MBD2	0.198
RILPL21	5.91607e-121	0.428792	0.696	0.518	8.86049e-117	Mono-FCN1-S100A8-9-VCAN	RILPL2	0.178
TPM4	3.4447e-105	0.427945	0.612	0.456	5.15913e-101	Mono-FCN1-S100A8-9-VCAN	TPM4	0.156
SERP1	1.59337e-153	0.426988	0.788	0.651	2.38639e-149	Mono-FCN1-S100A8-9-VCAN	SERP1	0.137
IQGAP1	1.17512e-153	0.426024	0.598	0.397	1.75998e-149	Mono-FCN1-S100A8-9-VCAN	IQGAP1	0.201
SLC43A2	6.7234e-109	0.425391	0.535	0.362	1.00696e-104	Mono-FCN1-S100A8-9-VCAN	SLC43A2	0.173
RARA	2.6568e-273	0.421436	0.328	0.112	3.97909e-269	Mono-FCN1-S100A8-9-VCAN	RARA	0.216
EIF3K	5.27226e-132	0.421204	0.746	0.595	7.89626e-128	Mono-FCN1-S100A8-9-VCAN	EIF3K	0.151
GPSM3	6.22428e-102	0.417376	0.675	0.521	9.32211e-98	Mono-FCN1-S100A8-9-VCAN	GPSM3	0.154
C4orf31	1.25834e-115	0.415209	0.662	0.478	1.88461e-111	Mono-FCN1-S100A8-9-VCAN	C4orf3	0.184
ACSL3	6.79327e-82	0.414736	0.44	0.291	1.01743e-77	Mono-FCN1-S100A8-9-VCAN	ACSL3	0.149
MYL12A	1.7831e-155	0.412098	0.762	0.61	2.67056e-151	Mono-FCN1-S100A8-9-VCAN	MYL12A	0.152
CPD	2.04464e-214	0.411137	0.285	0.102	3.06225e-210	Mono-FCN1-S100A8-9-VCAN	CPD	0.183
PRKCB	9.01293e-181	0.410003	0.326	0.14	1.34987e-176	Mono-FCN1-S100A8-9-VCAN	PRKCB	0.186
CNIH4	2.283e-111	0.409468	0.407	0.239	3.41926e-107	Mono-FCN1-S100A8-9-VCAN	CNIH4	0.168
KCNE1	1.34613e-252	0.409303	0.254	0.075	2.01609e-248	Mono-FCN1-S100A8-9-VCAN	KCNE1	0.179
TNFRSF1B	3.81534e-110	0.407774	0.645	0.482	5.71424e-106	Mono-FCN1-S100A8-9-VCAN	TNFRSF1B	0.163
PFN1	3.3011e-113	0.403633	0.865	0.764	4.94406e-109	Mono-FCN1-S100A8-9-VCAN	PFN1	0.101
APLP21	2.35234e-108	0.40017	0.721	0.586	3.52311e-104	Mono-FCN1-S100A8-9-VCAN	APLP2	0.135
DUSP6	1.81461e-70	0.399557	0.425	0.285	2.71774e-66	Mono-FCN1-S100A8-9-VCAN	DUSP6	0.14
PSME21	1.70682e-66	0.399432	0.62	0.497	2.5563e-62	Mono-FCN1-S100A8-9-VCAN	PSME2	0.123
PSMB91	2.77469e-79	0.399141	0.531	0.388	4.15565e-75	Mono-FCN1-S100A8-9-VCAN	PSMB9	0.143
TXN2	8.97634e-141	0.392945	0.639	0.433	1.34439e-136	Mono-FCN1-S100A8-9-VCAN	TXN	0.206
SLC25A6	7.90851e-86	0.390347	0.786	0.689	1.18446e-81	Mono-FCN1-S100A8-9-VCAN	SLC25A6	0.097
METRNL1	3.03788e-126	0.389799	0.535	0.339	4.54983e-122	Mono-FCN1-S100A8-9-VCAN	METRNL	0.196
CASP4	7.01356e-140	0.389038	0.516	0.321	1.05042e-135	Mono-FCN1-S100A8-9-VCAN	CASP4	0.195
KYNU	3.22658e-134	0.386629	0.406	0.224	4.83245e-130	Mono-FCN1-S100A8-9-VCAN	KYNU	0.182
CPPED1	3.0413e-155	0.386472	0.324	0.15	4.55496e-151	Mono-FCN1-S100A8-9-VCAN	CPPED1	0.174
LGALS12	1.26938e-168	0.385861	0.847	0.646	1.90116e-164	Mono-FCN1-S100A8-9-VCAN	LGALS1	0.201
LRRK2	6.19404e-111	0.385847	0.318	0.166	9.27682e-107	Mono-FCN1-S100A8-9-VCAN	LRRK2	0.152
CAPN2	1.81263e-272	0.385219	0.29	0.091	2.71478e-268	Mono-FCN1-S100A8-9-VCAN	CAPN2	0.199
PYCARD	2.82281e-93	0.381661	0.713	0.574	4.22772e-89	Mono-FCN1-S100A8-9-VCAN	PYCARD	0.139
LYST	1.0346e-105	0.381086	0.326	0.173	1.54952e-101	Mono-FCN1-S100A8-9-VCAN	LYST	0.153
MIF1	6.31564e-55	0.381061	0.561	0.424	9.45893e-51	Mono-FCN1-S100A8-9-VCAN	MIF	0.137
SERF2	9.74917e-173	0.380486	0.895	0.807	1.46013e-168	Mono-FCN1-S100A8-9-VCAN	SERF2	0.088
TMSB10	2.48052e-200	0.378476	0.956	0.924	3.71507e-196	Mono-FCN1-S100A8-9-VCAN	TMSB10	0.032
FOSL2	1.89077e-148	0.37782	0.552	0.335	2.8318e-144	Mono-FCN1-S100A8-9-VCAN	FOSL2	0.217
ASPH1	7.62355e-90	0.376476	0.348	0.202	1.14178e-85	Mono-FCN1-S100A8-9-VCAN	ASPH	0.146
LRRFIP1	1.10472e-105	0.376206	0.691	0.542	1.65453e-101	Mono-FCN1-S100A8-9-VCAN	LRRFIP1	0.149
PSME11	7.46602e-100	0.374207	0.661	0.507	1.11819e-95	Mono-FCN1-S100A8-9-VCAN	PSME1	0.154
MAP1LC3B	1.30481e-97	0.374186	0.641	0.478	1.95421e-93	Mono-FCN1-S100A8-9-VCAN	MAP1LC3B	0.163
S100A111	1.43096e-156	0.373477	0.909	0.841	2.14314e-152	Mono-FCN1-S100A8-9-VCAN	S100A11	0.068
FPR1	2.16006e-96	0.371925	0.721	0.567	3.23513e-92	Mono-FCN1-S100A8-9-VCAN	FPR1	0.154
ZDHHC20	1.66184e-205	0.371171	0.314	0.123	2.48893e-201	Mono-FCN1-S100A8-9-VCAN	ZDHHC20	0.191
ABHD51	1.02015e-81	0.371094	0.371	0.223	1.52788e-77	Mono-FCN1-S100A8-9-VCAN	ABHD5	0.148
C5AR11	9.22288e-84	0.368152	0.708	0.569	1.38131e-79	Mono-FCN1-S100A8-9-VCAN	C5AR1	0.139
ARPC1B	5.32805e-90	0.3681	0.749	0.623	7.97981e-86	Mono-FCN1-S100A8-9-VCAN	ARPC1B	0.126
PHC2	1.75381e-108	0.362454	0.523	0.345	2.62669e-104	Mono-FCN1-S100A8-9-VCAN	PHC2	0.178
NDRG11	5.64664e-134	0.358046	0.342	0.168	8.45697e-130	Mono-FCN1-S100A8-9-VCAN	NDRG1	0.174
FAM107B	3.30547e-129	0.357054	0.358	0.183	4.9506e-125	Mono-FCN1-S100A8-9-VCAN	FAM107B	0.175
MAP3K8	1.92999e-79	0.356721	0.641	0.497	2.89055e-75	Mono-FCN1-S100A8-9-VCAN	MAP3K8	0.144
PGK11	2.2029e-127	0.35654	0.728	0.56	3.29929e-123	Mono-FCN1-S100A8-9-VCAN	PGK1	0.168
TPI11	3.91302e-86	0.354862	0.772	0.645	5.86053e-82	Mono-FCN1-S100A8-9-VCAN	TPI1	0.127
PSMB10	1.73272e-65	0.354768	0.396	0.264	2.59509e-61	Mono-FCN1-S100A8-9-VCAN	PSMB10	0.132
BACH1	8.17495e-78	0.353633	0.384	0.247	1.22436e-73	Mono-FCN1-S100A8-9-VCAN	BACH1	0.137
TES	3.03247e-129	0.35247	0.361	0.187	4.54174e-125	Mono-FCN1-S100A8-9-VCAN	TES	0.174
ARF5	2.58126e-89	0.351946	0.435	0.273	3.86595e-85	Mono-FCN1-S100A8-9-VCAN	ARF5	0.162
ZYX	1.75395e-93	0.351441	0.571	0.403	2.62689e-89	Mono-FCN1-S100A8-9-VCAN	ZYX	0.168
ARPC5	8.67088e-128	0.35037	0.719	0.567	1.29864e-123	Mono-FCN1-S100A8-9-VCAN	ARPC5	0.152
PIM3	1.14417e-92	0.349174	0.453	0.289	1.71362e-88	Mono-FCN1-S100A8-9-VCAN	PIM3	0.164
SOCS3	5.02561e-105	0.34864	0.603	0.414	7.52686e-101	Mono-FCN1-S100A8-9-VCAN	SOCS3	0.189
SHKBP1	3.27477e-129	0.346987	0.437	0.249	4.90462e-125	Mono-FCN1-S100A8-9-VCAN	SHKBP1	0.188
DIAPH1	6.5606e-186	0.345741	0.346	0.152	9.82582e-182	Mono-FCN1-S100A8-9-VCAN	DIAPH1	0.194
BZW1	9.0372e-77	0.344385	0.53	0.392	1.3535e-72	Mono-FCN1-S100A8-9-VCAN	BZW1	0.138
LIMD2	1.18365e-96	0.341951	0.447	0.284	1.77276e-92	Mono-FCN1-S100A8-9-VCAN	LIMD2	0.163
ABRACL	1.07717e-123	0.340445	0.464	0.274	1.61327e-119	Mono-FCN1-S100A8-9-VCAN	ABRACL	0.19
CASP1	1.41353e-80	0.33939	0.475	0.326	2.11705e-76	Mono-FCN1-S100A8-9-VCAN	CASP1	0.149
JMJD1C	6.43581e-68	0.339166	0.544	0.407	9.63891e-64	Mono-FCN1-S100A8-9-VCAN	JMJD1C	0.137
ACTG1	3.41369e-118	0.338697	0.861	0.773	5.11269e-114	Mono-FCN1-S100A8-9-VCAN	ACTG1	0.088
NOP10	4.07263e-68	0.337461	0.682	0.543	6.09958e-64	Mono-FCN1-S100A8-9-VCAN	NOP10	0.139
GAPDH1	1.71288e-108	0.3374	0.917	0.854	2.56539e-104	Mono-FCN1-S100A8-9-VCAN	GAPDH	0.063
PHACTR1	1.99893e-82	0.336469	0.495	0.331	2.99379e-78	Mono-FCN1-S100A8-9-VCAN	PHACTR1	0.164
EEF1D	6.7646e-100	0.334304	0.832	0.717	1.01313e-95	Mono-FCN1-S100A8-9-VCAN	EEF1D	0.115
HEBP2	8.97262e-123	0.333584	0.336	0.173	1.34383e-118	Mono-FCN1-S100A8-9-VCAN	HEBP2	0.163
ENO11	4.09504e-132	0.333154	0.785	0.632	6.13314e-128	Mono-FCN1-S100A8-9-VCAN	ENO1	0.153
EVI2B	4.32026e-52	0.333011	0.582	0.472	6.47045e-48	Mono-FCN1-S100A8-9-VCAN	EVI2B	0.11
SLC11A1	3.13617e-78	0.332956	0.769	0.656	4.69705e-74	Mono-FCN1-S100A8-9-VCAN	SLC11A1	0.113
RNASEK	3.75772e-17	0.332673	0.284	0.223	5.62793e-13	Mono-FCN1-S100A8-9-VCAN	RNASEK	0.061
SEPT9	3.07099e-151	0.332446	0.375	0.187	4.59942e-147	Mono-FCN1-S100A8-9-VCAN	SEPT9	0.188
UBALD2	1.67102e-97	0.33226	0.437	0.274	2.50268e-93	Mono-FCN1-S100A8-9-VCAN	UBALD2	0.163
ACTB	8.96319e-109	0.331985	0.951	0.931	1.34242e-104	Mono-FCN1-S100A8-9-VCAN	ACTB	0.02
CAPNS1	1.2649e-137	0.331339	0.52	0.325	1.89445e-133	Mono-FCN1-S100A8-9-VCAN	CAPNS1	0.195
CYTIP	2.29371e-68	0.330724	0.422	0.283	3.43528e-64	Mono-FCN1-S100A8-9-VCAN	CYTIP	0.139
AP2S1	3.16845e-106	0.330677	0.709	0.546	4.74538e-102	Mono-FCN1-S100A8-9-VCAN	AP2S1	0.163
IFI30	2.51129e-86	0.329899	0.551	0.39	3.76115e-82	Mono-FCN1-S100A8-9-VCAN	IFI30	0.161
ITGAX1	1.93444e-47	0.329189	0.527	0.409	2.89721e-43	Mono-FCN1-S100A8-9-VCAN	ITGAX	0.118
MMP191	8.11522e-41	0.329189	0.268	0.172	1.21542e-36	Mono-FCN1-S100A8-9-VCAN	MMP19	0.096
PTP4A2	5.18022e-75	0.329073	0.499	0.363	7.75841e-71	Mono-FCN1-S100A8-9-VCAN	PTP4A2	0.136
ARPC2	8.28657e-122	0.328721	0.792	0.672	1.24108e-117	Mono-FCN1-S100A8-9-VCAN	ARPC2	0.12
HIGD2A	2.82484e-70	0.328244	0.669	0.543	4.23076e-66	Mono-FCN1-S100A8-9-VCAN	HIGD2A	0.126
HRH2	8.77309e-114	0.327377	0.321	0.165	1.31395e-109	Mono-FCN1-S100A8-9-VCAN	HRH2	0.156
PTEN	3.30084e-110	0.326873	0.436	0.266	4.94367e-106	Mono-FCN1-S100A8-9-VCAN	PTEN	0.17
CTNNB1	1.99821e-68	0.325975	0.564	0.433	2.99272e-64	Mono-FCN1-S100A8-9-VCAN	CTNNB1	0.131
SLC7A7	7.45306e-72	0.325738	0.522	0.385	1.11624e-67	Mono-FCN1-S100A8-9-VCAN	SLC7A7	0.137
AIF1	1.09284e-107	0.325235	0.863	0.783	1.63674e-103	Mono-FCN1-S100A8-9-VCAN	AIF1	0.08
SUB1	5.01045e-115	0.325136	0.719	0.571	7.50415e-111	Mono-FCN1-S100A8-9-VCAN	SUB1	0.148
NUP214	1.00997e-72	0.324916	0.424	0.283	1.51263e-68	Mono-FCN1-S100A8-9-VCAN	NUP214	0.141
KCNAB2	4.69077e-169	0.324771	0.374	0.177	7.02536e-165	Mono-FCN1-S100A8-9-VCAN	KCNAB2	0.197
LITAF	1.95468e-60	0.324307	0.667	0.551	2.92753e-56	Mono-FCN1-S100A8-9-VCAN	LITAF	0.116
PSMA7	8.10561e-123	0.323698	0.737	0.58	1.21398e-118	Mono-FCN1-S100A8-9-VCAN	PSMA7	0.157
TMEM167A	1.19182e-106	0.323619	0.482	0.312	1.78498e-102	Mono-FCN1-S100A8-9-VCAN	TMEM167A	0.17
SERTAD1	2.25087e-75	0.323441	0.462	0.311	3.37113e-71	Mono-FCN1-S100A8-9-VCAN	SERTAD1	0.151
PECAM1	6.6723e-75	0.322506	0.411	0.272	9.9931e-71	Mono-FCN1-S100A8-9-VCAN	PECAM1	0.139
ARPC3	7.64846e-127	0.322242	0.846	0.744	1.14551e-122	Mono-FCN1-S100A8-9-VCAN	ARPC3	0.102
STMN1	0	1.37223	0.501	0.231	0	Proliferating	STMN1	0.27
HIST1H4C	6.04891e-188	1.20304	0.455	0.315	9.05945e-184	Proliferating	HIST1H4C	0.14
H2AFZ	0	1.1654	0.66	0.514	0	Proliferating	H2AFZ	0.146
TUBB	0	1.06181	0.657	0.526	0	Proliferating	TUBB	0.131
HMGN2	0	0.946205	0.657	0.541	0	Proliferating	HMGN2	0.116
TUBA1B	0	0.926776	0.765	0.731	0	Proliferating	TUBA1B	0.034
FN12	1.23868e-204	0.912494	0.294	0.153	1.85517e-200	Proliferating	FN1	0.141
TYMS	0	0.893932	0.303	0.019	0	Proliferating	TYMS	0.284
PTTG1	0	0.878451	0.335	0.105	0	Proliferating	PTTG1	0.23
PCLAF	0	0.874602	0.321	0.025	0	Proliferating	PCLAF	0.296
MKI67	0	0.868273	0.262	0.016	0	Proliferating	MKI67	0.246
PCNA	0	0.839371	0.373	0.135	0	Proliferating	PCNA	0.238
CENPF	0	0.820395	0.255	0.035	0	Proliferating	CENPF	0.22
TK1	0	0.802596	0.316	0.027	0	Proliferating	TK1	0.289
HMGB1	2.24643e-279	0.715904	0.726	0.717	3.36448e-275	Proliferating	HMGB1	0.009
NUSAP1	0	0.71162	0.27	0.042	0	Proliferating	NUSAP1	0.228
HMGB2	3.2922e-155	0.709633	0.557	0.457	4.93073e-151	Proliferating	HMGB2	0.1
TGFBI1	2.39739e-242	0.703382	0.588	0.429	3.59058e-238	Proliferating	TGFBI	0.159
CKS1B	0	0.688825	0.362	0.1	0	Proliferating	CKS1B	0.262
ENO12	0	0.671555	0.71	0.63	0	Proliferating	ENO1	0.08
DUT	8.42877e-247	0.663761	0.472	0.308	1.26238e-242	Proliferating	DUT	0.164
TUBA1C	0	0.660262	0.514	0.32	0	Proliferating	TUBA1C	0.194
H2AFV	0	0.654662	0.568	0.405	0	Proliferating	H2AFV	0.163
RANBP1	0	0.654378	0.535	0.328	0	Proliferating	RANBP1	0.207
RAN	0	0.637076	0.629	0.508	0	Proliferating	RAN	0.121
CDK1	0	0.609198	0.261	0.048	0	Proliferating	CDK1	0.213
LDHA1	1.3123e-254	0.607684	0.696	0.608	1.96544e-250	Proliferating	LDHA	0.088
PKM1	1.78161e-270	0.606345	0.671	0.586	2.66831e-266	Proliferating	PKM	0.085
S100A42	2.74889e-190	0.602273	0.651	0.541	4.11702e-186	Proliferating	S100A4	0.11
BIRC5	0	0.588201	0.257	0.015	0	Proliferating	BIRC5	0.242
LGALS13	3.55662e-161	0.586921	0.7	0.649	5.32675e-157	Proliferating	LGALS1	0.051
LSM4	0	0.582496	0.538	0.33	0	Proliferating	LSM4	0.208
NME1	0	0.575925	0.462	0.222	0	Proliferating	NME1	0.24
DEK	3.37562e-199	0.567502	0.58	0.474	5.05566e-195	Proliferating	DEK	0.106
ANXA23	9.79285e-158	0.561662	0.563	0.448	1.46667e-153	Proliferating	ANXA2	0.115
CENPX	0	0.559908	0.446	0.199	0	Proliferating	CENPX	0.247
AP2S11	1.62399e-252	0.553721	0.64	0.543	2.43224e-248	Proliferating	AP2S1	0.097
NASP	1.45416e-176	0.552399	0.496	0.353	2.17789e-172	Proliferating	NASP	0.143
SMC4	0	0.542623	0.344	0.147	0	Proliferating	SMC4	0.197
RPA3	0	0.529377	0.407	0.174	0	Proliferating	RPA3	0.233
NUCKS1	7.45112e-152	0.52674	0.602	0.515	1.11595e-147	Proliferating	NUCKS1	0.087
PGAM11	1.38268e-263	0.524063	0.556	0.391	2.07084e-259	Proliferating	PGAM1	0.165
S100A102	7.44055e-138	0.517125	0.582	0.458	1.11437e-133	Proliferating	S100A10	0.124
TPI12	2.03132e-208	0.516072	0.694	0.645	3.04232e-204	Proliferating	TPI1	0.049
PFN11	9.30344e-212	0.511737	0.728	0.772	1.39338e-207	Proliferating	PFN1	-0.044
DNMT1	7.72624e-282	0.509538	0.425	0.239	1.15716e-277	Proliferating	DNMT1	0.186
UBE2S	2.31339e-156	0.507068	0.323	0.19	3.46476e-152	Proliferating	UBE2S	0.133
H2AFX	0	0.504293	0.327	0.148	0	Proliferating	H2AFX	0.179
CENPM	0	0.501167	0.254	0.016	0	Proliferating	CENPM	0.238
DTYMK	0	0.49855	0.339	0.098	0	Proliferating	DTYMK	0.241
IDH2	6.13567e-284	0.496453	0.511	0.332	9.18939e-280	Proliferating	IDH2	0.179
CALM3	3.87777e-220	0.49577	0.564	0.412	5.80774e-216	Proliferating	CALM3	0.152
PARP1	3.68961e-237	0.486617	0.493	0.318	5.52593e-233	Proliferating	PARP1	0.175
TAGLN23	3.04709e-181	0.48608	0.559	0.421	4.56363e-177	Proliferating	TAGLN2	0.138
ANP32B	1.16293e-187	0.483733	0.584	0.466	1.74172e-183	Proliferating	ANP32B	0.118
VIM3	4.36649e-249	0.483548	0.786	0.69	6.53969e-245	Proliferating	VIM	0.096
ANAPC11	2.63591e-243	0.483499	0.59	0.457	3.9478e-239	Proliferating	ANAPC11	0.133
GAPDH2	0	0.482304	0.834	0.858	0	Proliferating	GAPDH	-0.024
MZT2B	1.67373e-157	0.482057	0.58	0.476	2.50675e-153	Proliferating	MZT2B	0.104
PTMA	0	0.480554	0.842	0.877	0	Proliferating	PTMA	-0.035
SNRPB	2.21933e-190	0.480381	0.589	0.48	3.32389e-186	Proliferating	SNRPB	0.109
SNRPG	1.44477e-190	0.478157	0.567	0.439	2.16384e-186	Proliferating	SNRPG	0.128
PA2G4	7.47197e-224	0.477044	0.538	0.388	1.11908e-219	Proliferating	PA2G4	0.15
KPNA2	2.47534e-219	0.474064	0.371	0.209	3.70732e-215	Proliferating	KPNA2	0.162
CARHSP1	0	0.462713	0.347	0.14	0	Proliferating	CARHSP1	0.207
COX8A	2.48652e-185	0.46271	0.652	0.61	3.72406e-181	Proliferating	COX8A	0.042
SNRPD1	1.48239e-270	0.460982	0.511	0.328	2.22017e-266	Proliferating	SNRPD1	0.183
ZWINT	0	0.457905	0.271	0.028	0	Proliferating	ZWINT	0.243
MIF2	2.26592e-91	0.456256	0.523	0.42	3.39367e-87	Proliferating	MIF	0.103
MCM5	1.7236e-246	0.454269	0.359	0.194	2.58144e-242	Proliferating	MCM5	0.165
ALOX5AP	6.06848e-105	0.45241	0.689	0.691	9.08876e-101	Proliferating	ALOX5AP	-0.002
UQCRQ	9.96354e-147	0.452123	0.615	0.542	1.49224e-142	Proliferating	UQCRQ	0.073
SMC1A	2.19446e-193	0.450447	0.388	0.231	3.28665e-189	Proliferating	SMC1A	0.157
EIF5A	2.542e-155	0.45004	0.562	0.447	3.80715e-151	Proliferating	EIF5A	0.115
TMEM106C	0	0.449078	0.286	0.061	0	Proliferating	TMEM106C	0.225
LDHB	3.89183e-143	0.447652	0.565	0.45	5.82879e-139	Proliferating	LDHB	0.115
TXNDC17	2.64779e-254	0.446237	0.507	0.325	3.9656e-250	Proliferating	TXNDC17	0.182
PSME23	8.0476e-160	0.445982	0.605	0.492	1.20529e-155	Proliferating	PSME2	0.113
PDIA6	1.86709e-184	0.44436	0.548	0.409	2.79634e-180	Proliferating	PDIA6	0.139
PGK12	5.45805e-133	0.442199	0.635	0.56	8.17453e-129	Proliferating	PGK1	0.075
SMC2	0	0.4395	0.315	0.114	0	Proliferating	SMC2	0.201
SDF2L1	1.1724e-275	0.438854	0.479	0.286	1.75591e-271	Proliferating	SDF2L1	0.193
ACTB2	0	0.438837	0.908	0.934	0	Proliferating	ACTB	-0.026
HMGB3	0	0.43632	0.271	0.061	0	Proliferating	HMGB3	0.21
PLAU	4.28101e-81	0.432595	0.328	0.219	6.41168e-77	Proliferating	PLAU	0.109
PPP1R14B	1.36779e-130	0.430294	0.36	0.23	2.04854e-126	Proliferating	PPP1R14B	0.13
MCM7	0	0.425923	0.264	0.061	0	Proliferating	MCM7	0.203
PPIA	1.72221e-193	0.425849	0.73	0.76	2.57936e-189	Proliferating	PPIA	-0.03
SNRPE	6.81594e-208	0.424088	0.489	0.323	1.02082e-203	Proliferating	SNRPE	0.166
LSM5	0	0.421782	0.467	0.265	0	Proliferating	LSM5	0.202
CHCHD2	2.68627e-161	0.420089	0.666	0.647	4.02323e-157	Proliferating	CHCHD2	0.019
POLR2L	1.7914e-141	0.419371	0.566	0.452	2.68298e-137	Proliferating	POLR2L	0.114
SIVA1	6.36524e-165	0.418923	0.513	0.38	9.53323e-161	Proliferating	SIVA1	0.133
TMPO	4.14038e-176	0.417615	0.391	0.24	6.20104e-172	Proliferating	TMPO	0.151
PHF19	0	0.416949	0.272	0.066	0	Proliferating	PHF19	0.206
PSMC3	5.8298e-273	0.414597	0.466	0.277	8.7313e-269	Proliferating	PSMC3	0.189
CALR	5.31137e-123	0.414301	0.659	0.614	7.95484e-119	Proliferating	CALR	0.045
SLC25A51	1.83554e-139	0.414236	0.63	0.555	2.74908e-135	Proliferating	SLC25A5	0.075
COX5A	2.13411e-143	0.407668	0.599	0.507	3.19625e-139	Proliferating	COX5A	0.092
UQCC2	1.22416e-291	0.404701	0.489	0.292	1.83343e-287	Proliferating	UQCC2	0.197
BANF1	3.64029e-194	0.403884	0.561	0.411	5.45206e-190	Proliferating	BANF1	0.15
PARK7	3.61895e-159	0.403881	0.608	0.518	5.4201e-155	Proliferating	PARK7	0.09
NDUFS6	1.98468e-170	0.40155	0.558	0.428	2.97246e-166	Proliferating	NDUFS6	0.13
TACC3	0	0.399117	0.289	0.095	0	Proliferating	TACC3	0.194
RNASE2	2.22496e-206	0.396079	0.452	0.278	3.33232e-202	Proliferating	RNASE2	0.174
SKA2	0	0.394424	0.32	0.112	0	Proliferating	SKA2	0.208
ANP32E	7.22657e-205	0.394182	0.377	0.219	1.08232e-200	Proliferating	ANP32E	0.158
SNRPF	3.3629e-170	0.393868	0.508	0.364	5.03661e-166	Proliferating	SNRPF	0.144
NHP2	5.1632e-279	0.393592	0.482	0.288	7.73292e-275	Proliferating	NHP2	0.194
MRPL51	1.92829e-200	0.393059	0.509	0.349	2.888e-196	Proliferating	MRPL51	0.16
SNRNP25	0	0.391346	0.359	0.149	0	Proliferating	SNRNP25	0.21
TIMM8B	1.80374e-200	0.391129	0.493	0.327	2.70146e-196	Proliferating	TIMM8B	0.166
SEC61G1	7.57038e-96	0.390079	0.585	0.485	1.13382e-91	Proliferating	SEC61G	0.1
SET	7.30239e-78	0.389173	0.557	0.468	1.09368e-73	Proliferating	SET	0.089
CENPW	0	0.385199	0.293	0.07	0	Proliferating	CENPW	0.223
HSP90B11	5.29331e-113	0.377885	0.665	0.601	7.92779e-109	Proliferating	HSP90B1	0.064
YBX1	1.55346e-148	0.377406	0.715	0.717	2.32661e-144	Proliferating	YBX1	-0.002
C1QBP	7.82149e-187	0.376921	0.492	0.333	1.17142e-182	Proliferating	C1QBP	0.159
MZT2A	3.4799e-244	0.375395	0.439	0.257	5.21185e-240	Proliferating	MZT2A	0.182
LSM7	2.91709e-141	0.37485	0.526	0.388	4.36892e-137	Proliferating	LSM7	0.138
HINT11	1.30945e-121	0.374485	0.623	0.551	1.96116e-117	Proliferating	HINT1	0.072
NDUFB2	1.4436e-126	0.374354	0.625	0.556	2.16208e-122	Proliferating	NDUFB2	0.069
P4HB1	3.19821e-164	0.372827	0.611	0.5	4.78996e-160	Proliferating	P4HB	0.111
CFL1	4.43088e-212	0.371886	0.739	0.788	6.63613e-208	Proliferating	CFL1	-0.049
FKBP1A1	6.44121e-139	0.368338	0.584	0.479	9.647e-135	Proliferating	FKBP1A	0.105
NUDT1	3.27511e-273	0.368296	0.444	0.253	4.90513e-269	Proliferating	NUDT1	0.191
LMNB1	0	0.366836	0.27	0.074	0	Proliferating	LMNB1	0.196
PDIA41	9.69355e-186	0.360831	0.435	0.268	1.4518e-181	Proliferating	PDIA4	0.167
DDX39A	8.08534e-226	0.360369	0.436	0.259	1.21094e-221	Proliferating	DDX39A	0.177
PRELID12	3.73026e-103	0.359192	0.559	0.454	5.58681e-99	Proliferating	PRELID1	0.105
SLIRP	3.25904e-136	0.359061	0.516	0.39	4.88107e-132	Proliferating	SLIRP	0.126
DCTPP1	0	0.357839	0.328	0.134	0	Proliferating	DCTPP1	0.194
FNDC3B1	7.7512e-73	0.357787	0.332	0.226	1.1609e-68	Proliferating	FNDC3B	0.106
FABP52	2.0624e-141	0.357211	0.527	0.377	3.08885e-137	Proliferating	FABP5	0.15
NDUFAB1	1.31323e-184	0.354682	0.49	0.33	1.96682e-180	Proliferating	NDUFAB1	0.16
CCT5	2.41899e-198	0.352159	0.46	0.301	3.62292e-194	Proliferating	CCT5	0.159
PSMA71	8.74504e-114	0.351205	0.634	0.581	1.30974e-109	Proliferating	PSMA7	0.053
NCL	3.89785e-58	0.350686	0.611	0.556	5.83781e-54	Proliferating	NCL	0.055
SRSF9	2.77857e-109	0.349636	0.498	0.378	4.16147e-105	Proliferating	SRSF9	0.12
RAD21	6.96465e-120	0.348297	0.411	0.281	1.0431e-115	Proliferating	RAD21	0.13
RAC21	2.13369e-222	0.348228	0.437	0.258	3.19563e-218	Proliferating	RAC2	0.179
HMGA1	1.8689e-162	0.347396	0.444	0.29	2.79906e-158	Proliferating	HMGA1	0.154
ECHS1	2.35899e-142	0.347179	0.485	0.343	3.53305e-138	Proliferating	ECHS1	0.142
FBP12	6.61248e-41	0.346986	0.337	0.259	9.9035e-37	Proliferating	FBP1	0.078
DYNLL1	1.87605e-94	0.344454	0.607	0.527	2.80977e-90	Proliferating	DYNLL1	0.08
SRM	2.1871e-228	0.343552	0.312	0.155	3.27562e-224	Proliferating	SRM	0.157
PSMB2	5.07862e-174	0.343444	0.498	0.34	7.60625e-170	Proliferating	PSMB2	0.158
ERH	7.39301e-153	0.342803	0.55	0.42	1.10725e-148	Proliferating	ERH	0.13
NME4	1.02407e-229	0.3427	0.387	0.213	1.53376e-225	Proliferating	NME4	0.174
PDCD5	3.89245e-207	0.342207	0.456	0.287	5.82972e-203	Proliferating	PDCD5	0.169
SNRPD3	6.27567e-176	0.341249	0.503	0.347	9.39907e-172	Proliferating	SNRPD3	0.156
PPM1G	1.63002e-164	0.341177	0.44	0.287	2.44129e-160	Proliferating	PPM1G	0.153
PRDX2	4.77466e-155	0.340662	0.441	0.29	7.151e-151	Proliferating	PRDX2	0.151
MYL61	7.29081e-169	0.339509	0.764	0.798	1.09194e-164	Proliferating	MYL6	-0.034
GSTO12	4.84533e-87	0.339328	0.6	0.53	7.25685e-83	Proliferating	GSTO1	0.07
COX7B	4.29235e-88	0.337929	0.619	0.569	6.42866e-84	Proliferating	COX7B	0.05
YWHAE	1.10829e-80	0.337748	0.605	0.54	1.65989e-76	Proliferating	YWHAE	0.065
VPS29	1.2342e-124	0.337433	0.551	0.437	1.84846e-120	Proliferating	VPS29	0.114
MRPL52	4.81226e-155	0.335127	0.505	0.362	7.20732e-151	Proliferating	MRPL52	0.143
USP1	2.63239e-254	0.334078	0.254	0.11	3.94253e-250	Proliferating	USP1	0.144
NDUFB3	3.64338e-164	0.333688	0.509	0.365	5.45669e-160	Proliferating	NDUFB3	0.144
KIF22	0	0.333521	0.286	0.102	0	Proliferating	KIF22	0.184
SLBP	1.07392e-142	0.333078	0.326	0.194	1.60841e-138	Proliferating	SLBP	0.132
PRDX3	2.28225e-170	0.332484	0.506	0.35	3.41813e-166	Proliferating	PRDX3	0.156
TUBB4B	1.9306e-67	0.330926	0.489	0.405	2.89146e-63	Proliferating	TUBB4B	0.084
MINOS1	6.73404e-109	0.330039	0.602	0.527	1.00856e-104	Proliferating	MINOS1	0.075
PLP22	1.01724e-181	0.329857	0.371	0.218	1.52351e-177	Proliferating	PLP2	0.153
CLEC5A1	9.14234e-172	0.32984	0.353	0.2	1.36925e-167	Proliferating	CLEC5A	0.153
ZDHHC12	2.58931e-230	0.328551	0.405	0.232	3.87801e-226	Proliferating	ZDHHC12	0.173
CCDC167	0	0.327396	0.317	0.117	0	Proliferating	CCDC167	0.2
PPP1CA	5.0791e-114	0.326665	0.561	0.455	7.60697e-110	Proliferating	PPP1CA	0.106
PSMB3	2.07609e-114	0.326584	0.588	0.5	3.10936e-110	Proliferating	PSMB3	0.088
ARL6IP1	4.32807e-15	0.325698	0.564	0.534	6.48215e-11	Proliferating	ARL6IP1	0.03
PHB	2.52607e-180	0.32567	0.474	0.314	3.78329e-176	Proliferating	PHB	0.16
COX6C	2.66492e-89	0.324757	0.646	0.624	3.99126e-85	Proliferating	COX6C	0.022
SRP9	6.31989e-165	0.324129	0.483	0.327	9.46529e-161	Proliferating	SRP9	0.156
LSM3	2.78424e-192	0.32356	0.501	0.342	4.16996e-188	Proliferating	LSM3	0.159

## Sheet: Fractions
SampleID	Condition	IDH_status	MGMT	M1-CCL3-4-IL1B	M2-CXCR4-ZFP36-MHC2Hi	M3-ISGhi	M4-HSPhi	M5-CX3CR1-TMEM119-ADORA3	M6-GPNMB-APOE-CD68-Mphage	M7-VCAN-GPNMB-ANGPTL4-GlycoHi	Mono-FCN1-S100A8-9-VCAN	DC	Proliferating	L+M	LowRead1	Total	Myeloid
LB3018T	GBM.rec	WT	Un	159	26	1	51	39	19	7	23	29	17	5	2	378	371
LB3579T	GBM.rec	WT	Un	348	374	35	138	234	99	326	248	90	234	65	246	2437	2126
LB3612T	GBM.new	WT	Un	1334	210	30	190	121	102	124	56	89	126	60	2	2445	2383
LB3667T	GBM.PD1	WT	Meth	1264	409	101	190	231	190	68	40	198	163	114	32	3000	2854
LB3771T	GBM.new	WT	Meth	162	30	3	41	31	26	26	21	46	81	16	0	483	467
LB3836T	GBM.new	WT	Un	349	84	16	78	76	85	111	140	63	108	44	0	1154	1110
LB3851T	GBM.new	WT	Un	1424	162	48	382	268	163	98	25	81	259	85	5	3000	2910
LB3853T	GBM.PD1	WT	Meth	1450	489	60	323	181	104	69	67	118	65	66	7	2999	2926
LB3854T	GBM.new	WT	Un	855	298	19	230	254	84	126	54	51	158	11	68	2208	2129
LB3864T	GBM.PD1	WT	Un	958	486	64	310	271	167	163	50	107	133	105	10	2824	2709
LB3865T	GBM.new	WT	Un	296	462	88	128	211	96	294	74	47	210	107	24	2037	1906
LB3869T	GBM.PD1	WT	Un	191	102	22	79	49	30	67	26	53	75	32	2	728	694
LB3871T	GBM.rec	WT	Un	1083	402	173	277	290	142	149	49	152	231	45	6	3000	2949
LB3872T	GBM.PD1	WT	Meth	507	747	197	314	443	133	69	63	106	150	140	130	3000	2730
LB3914T	GBM.PD1	WT	Un	189	287	81	138	266	137	213	67	118	73	172	160	1901	1569
LB3915T	GBM.new	WT	Meth	138	402	62	380	884	108	551	64	34	260	46	71	3000	2883
LB3931T	GBM.new	WT	Meth	106	103	13	62	133	35	322	44	27	179	32	23	1079	1024
LB3933T	GBM.new	WT	Un	747	610	53	226	432	123	272	26	53	193	40	225	3000	2735
LB3941T	GBM.new	WT	Un	684	676	93	474	468	168	78	24	23	130	41	141	3000	2818
LB3944T	GBM.PD1	WT	Un	161	267	42	94	200	70	238	43	55	87	122	28	1407	1257
LB3958T	GBM.rec	Mut	Meth	695	134	24	129	76	40	52	79	114	82	56	9	1491	1426
LB3963T	GBM.new	WT	Meth	485	162	42	406	163	172	293	127	114	725	254	57	3000	2689
LB3964T	GBM.rec	Mut	Un	181	16	1	32	26	20	36	40	41	43	15	0	451	436
LB4003T	GBM.PD1	WT	Un	142	196	48	158	302	67	213	53	59	113	52	103	1506	1351
LB4006T	GBM.PD1	WT	Un	33	41	10	28	43	9	74	25	25	30	25	31	374	318
LB4015T	GBM.rec	WT	Meth	65	27	1	24	26	9	15	16	17	29	6	0	235	229
LB4024T	GBM.PD1	WT	Un	30	42	6	28	18	5	49	20	20	37	17	21	293	255
LB4025T	GBM.PD1	Mut	Meth	137	259	98	190	267	163	268	222	218	401	263	79	2565	2223
LB4034T	GBM.new	WT	Un	321	451	38	186	253	24	393	89	56	164	124	154	2253	1975
LB4038T	GBM.new	WT	Un	500	459	82	113	184	198	357	93	96	644	234	40	3000	2726
LB4059T	GBM.rec	WT	Un	319	365	61	234	270	226	277	133	97	85	103	27	2197	2067
LB4075T	GBM.PD1	WT	Meth	429	530	81	232	288	90	388	58	75	258	191	47	2667	2429
LB4101T	GBM.rec	WT	Un	393	404	73	183	352	201	378	57	68	184	30	21	2344	2293
LB4102T	GBM.rec	Mut	Un	152	182	62	212	543	86	205	58	161	189	123	45	2018	1850
LB4112T	GBM.PD1	WT	Un	159	481	95	102	136	59	185	235	146	163	33	50	1844	1761
LB4117T	GBM.PD1	WT	Un	157	189	14	48	75	29	47	26	13	76	10	45	729	674
LB4130T	GBM.rec	WT	Meth	20	33	4	13	35	9	52	20	14	58	9	21	288	258
LB4143T	GBM.rec	WT	Meth	37	81	11	25	27	18	116	80	38	98	7	58	596	531
LB4177T	GBM.rec	Mut	Un	215	275	45	94	147	45	152	29	35	152	12	74	1276	1190
LB4180T	GBM.new	WT	Un	38	48	8	23	42	22	31	13	13	22	13	12	285	260

## Sheet: Fraction.p.val
	Type	new.vs.PD1.wilcox	rec.vs.PD1.wilcox
1	M1-CCL3-4-IL1B	0.328667	0.704507
2	M2-CXCR4-ZFP36-MHC2Hi	0.125092	0.0269764
3	M3-ISGhi	0.000646216	0.0310434
4	M4-HSPhi	0.945946	0.494013
5	M5-CX3CR1-TMEM119-ADORA3	0.634669	0.704507
6	M6-GPNMB-APOE-CD68-Mphage	0.540927	0.93959
7	M7-VCAN-GPNMB-ANGPTL4-GlycoHi	0.981969	1
8	Mono-FCN1-S100A8-9-VCAN	0.634669	0.297233
9	DC	0.0106002	0.704507
10	Proliferating	0.401263	0.431892

## Sheet: DEG
Gene	p_val	avg_logFC	pct.1	pct.2	p_val_adj	cluster	gene	diff	celltype
SPP1	0	0.649167	0.987	0.961	0	GBM.new	SPP1	0.026	M1-CCL3-4-IL1B
G0S2	5.20712e-47	0.891324	0.375	0.306	7.79871e-43	GBM.new	G0S2	0.069	M1-CCL3-4-IL1B
VIM	2.31759e-27	0.661441	0.56	0.605	3.47105e-23	GBM.new	VIM	-0.045	M1-CCL3-4-IL1B
S100A8	1.49234e-20	0.953162	0.255	0.22	2.23508e-16	GBM.new	S100A8	0.035	M1-CCL3-4-IL1B
HAMP	1.40247e-19	1.14947	0.372	0.372	2.10048e-15	GBM.new	HAMP	0	M1-CCL3-4-IL1B
PLTP	7.72959e-13	0.729528	0.359	0.502	1.15766e-08	GBM.new	PLTP	-0.143	M1-CCL3-4-IL1B
IFITM3	1.06702e-239	1.06641	0.655	0.407	1.59807e-235	GBM.rec	IFITM3	0.248	M1-CCL3-4-IL1B
LY6E	3.00213e-188	1.1106	0.44	0.232	4.4963e-184	GBM.rec	LY6E	0.208	M1-CCL3-4-IL1B
IFI6	8.32022e-173	1.31395	0.488	0.289	1.24612e-168	GBM.rec	IFI6	0.199	M1-CCL3-4-IL1B
ISG15	1.08666e-157	1.5914	0.433	0.25	1.62749e-153	GBM.rec	ISG15	0.183	M1-CCL3-4-IL1B
IFIT3	8.29182e-155	0.728599	0.261	0.102	1.24187e-150	GBM.rec	IFIT3	0.159	M1-CCL3-4-IL1B
LGALS3BP	3.02192e-139	0.865882	0.461	0.278	4.52593e-135	GBM.rec	LGALS3BP	0.183	M1-CCL3-4-IL1B
IFI27	9.29896e-124	1.82419	0.363	0.221	1.39271e-119	GBM.rec	IFI27	0.142	M1-CCL3-4-IL1B
GABARAP	2.35728e-101	0.701195	0.508	0.345	3.53049e-97	GBM.rec	GABARAP	0.163	M1-CCL3-4-IL1B
PDK4	0	0.885837	0.756	0.361	0	GBM.PD1	PDK4	0.395	M1-CCL3-4-IL1B
NLRP3	0	0.852054	0.8	0.407	0	GBM.PD1	NLRP3	0.393	M1-CCL3-4-IL1B
ZFAND5	0	0.827446	0.865	0.486	0	GBM.PD1	ZFAND5	0.379	M1-CCL3-4-IL1B
CCL3L1	0	0.803255	0.829	0.534	0	GBM.PD1	CCL3L1	0.295	M1-CCL3-4-IL1B
CH25H	0	0.685869	0.779	0.409	0	GBM.PD1	CH25H	0.37	M1-CCL3-4-IL1B
CXCR4	0	0.615733	0.925	0.588	0	GBM.PD1	CXCR4	0.337	M1-CCL3-4-IL1B
DNAAF1	8.52677e-298	0.957646	0.315	0.097	1.27705e-293	GBM.PD1	DNAAF1	0.218	M1-CCL3-4-IL1B
CCL4L2	1.30159e-275	0.725832	0.863	0.599	1.9494e-271	GBM.PD1	CCL4L2	0.264	M1-CCL3-4-IL1B
CCL3	2.33763e-182	0.703084	0.954	0.791	3.50107e-178	GBM.PD1	CCL3	0.163	M1-CCL3-4-IL1B
SPP1	1.29031e-302	0.766488	0.969	0.86	1.9325e-298	GBM.new	SPP1	0.109	M2-CXCR4-ZFP36-MHC2Hi
G0S2	2.09208e-117	1.03981	0.401	0.216	3.1333e-113	GBM.new	G0S2	0.185	M2-CXCR4-ZFP36-MHC2Hi
HAMP	6.37398e-103	0.965411	0.476	0.326	9.5463e-99	GBM.new	HAMP	0.15	M2-CXCR4-ZFP36-MHC2Hi
S100A8	1.2232e-62	0.776516	0.38	0.262	1.83198e-58	GBM.new	S100A8	0.118	M2-CXCR4-ZFP36-MHC2Hi
CCL20	4.63093e-28	0.68561	0.257	0.176	6.93574e-24	GBM.new	CCL20	0.081	M2-CXCR4-ZFP36-MHC2Hi
PLTP	6.03005e-26	0.639682	0.606	0.636	9.0312e-22	GBM.new	PLTP	-0.03	M2-CXCR4-ZFP36-MHC2Hi
MRC1	7.7156e-157	0.840671	0.442	0.195	1.15556e-152	GBM.rec	MRC1	0.247	M2-CXCR4-ZFP36-MHC2Hi
NME2	1.15216e-140	0.703484	0.348	0.131	1.72559e-136	GBM.rec	NME2	0.217	M2-CXCR4-ZFP36-MHC2Hi
TFRC	2.97684e-78	0.595626	0.599	0.437	4.45841e-74	GBM.rec	TFRC	0.162	M2-CXCR4-ZFP36-MHC2Hi
GABARAP	1.43931e-67	0.697974	0.629	0.488	2.15566e-63	GBM.rec	GABARAP	0.141	M2-CXCR4-ZFP36-MHC2Hi
SELENOP	1.75504e-51	0.815844	0.474	0.332	2.62853e-47	GBM.rec	SELENOP	0.142	M2-CXCR4-ZFP36-MHC2Hi
CFD	3.9728e-28	0.751802	0.611	0.551	5.95007e-24	GBM.rec	CFD	0.06	M2-CXCR4-ZFP36-MHC2Hi
LYZ	1.00376e-21	1.55543	0.586	0.524	1.50334e-17	GBM.rec	LYZ	0.062	M2-CXCR4-ZFP36-MHC2Hi
ISG15	4.83868e-06	0.763259	0.43	0.393	0.072469	GBM.rec	ISG15	0.037	M2-CXCR4-ZFP36-MHC2Hi
IFI27	6.35843e-06	1.07045	0.284	0.266	0.0952302	GBM.rec	IFI27	0.018	M2-CXCR4-ZFP36-MHC2Hi
ZFAND5	0	0.723944	0.878	0.655	0	GBM.PD1	ZFAND5	0.223	M2-CXCR4-ZFP36-MHC2Hi
HLA-DQA1	2.20836e-307	0.707381	0.91	0.79	3.30745e-303	GBM.PD1	HLA-DQA1	0.12	M2-CXCR4-ZFP36-MHC2Hi
PDK4	3.91443e-250	0.861285	0.739	0.454	5.86264e-246	GBM.PD1	PDK4	0.285	M2-CXCR4-ZFP36-MHC2Hi
CLEC4E	4.94314e-242	0.697856	0.441	0.164	7.40334e-238	GBM.PD1	CLEC4E	0.277	M2-CXCR4-ZFP36-MHC2Hi
STAT1	6.01231e-216	0.60623	0.452	0.198	9.00463e-212	GBM.PD1	STAT1	0.254	M2-CXCR4-ZFP36-MHC2Hi
DNAAF1	1.32794e-156	0.734903	0.293	0.101	1.98885e-152	GBM.PD1	DNAAF1	0.192	M2-CXCR4-ZFP36-MHC2Hi
SERPING1	9.92121e-134	0.607573	0.519	0.318	1.4859e-129	GBM.PD1	SERPING1	0.201	M2-CXCR4-ZFP36-MHC2Hi
CH25H	1.46391e-115	0.585329	0.602	0.394	2.1925e-111	GBM.PD1	CH25H	0.208	M2-CXCR4-ZFP36-MHC2Hi
CALHM6	1.92551e-109	0.58696	0.512	0.337	2.88384e-105	GBM.PD1	CALHM6	0.175	M2-CXCR4-ZFP36-MHC2Hi
G0S2	3.61115e-15	1.05183	0.38	0.23	5.40841e-11	GBM.new	G0S2	0.15	M3-ISGhi
HAMP	6.32519e-13	0.942382	0.42	0.298	9.47324e-09	GBM.new	HAMP	0.122	M3-ISGhi
CXCL8	8.19432e-06	0.690434	0.382	0.311	0.122726	GBM.new	CXCL8	0.071	M3-ISGhi
S100A4	0.000339534	0.614406	0.558	0.589	1	GBM.new	S100A4	-0.031	M3-ISGhi
NAP1L1	0.000646526	0.652	0.576	0.653	1	GBM.new	NAP1L1	-0.077	M3-ISGhi
WTAP	0.00136575	0.600753	0.296	0.414	1	GBM.new	WTAP	-0.118	M3-ISGhi
EMP3	0.0028639	0.612948	0.434	0.441	1	GBM.new	EMP3	-0.007	M3-ISGhi
S100A6	0.00617858	0.595305	0.499	0.523	1	GBM.new	S100A6	-0.024	M3-ISGhi
NME2	5.32716e-37	0.815345	0.389	0.137	7.97849e-33	GBM.rec	NME2	0.252	M3-ISGhi
FOLR2	3.35261e-29	0.681163	0.609	0.369	5.02121e-25	GBM.rec	FOLR2	0.24	M3-ISGhi
GABARAP	1.1325e-21	0.700717	0.697	0.531	1.69615e-17	GBM.rec	GABARAP	0.166	M3-ISGhi
IFI27	1.0038e-14	1.21477	0.489	0.383	1.5034e-10	GBM.rec	IFI27	0.106	M3-ISGhi
ISG15	1.83961e-14	0.665756	0.886	0.765	2.75518e-10	GBM.rec	ISG15	0.121	M3-ISGhi
IFIT1	5.1974e-14	0.691445	0.576	0.438	7.78415e-10	GBM.rec	IFIT1	0.138	M3-ISGhi
EEF1G	6.15155e-08	0.619503	0.316	0.217	0.000921318	GBM.rec	EEF1G	0.099	M3-ISGhi
HLA-DQA1	5.76364e-74	0.808473	0.894	0.703	8.6322e-70	GBM.PD1	HLA-DQA1	0.191	M3-ISGhi
ANKRD22	5.22993e-52	0.625964	0.584	0.27	7.83287e-48	GBM.PD1	ANKRD22	0.314	M3-ISGhi
GBP4	3.23361e-50	0.813186	0.55	0.253	4.84298e-46	GBM.PD1	GBP4	0.297	M3-ISGhi
CXCL9	1.73345e-48	1.92345	0.283	0.048	2.59619e-44	GBM.PD1	CXCL9	0.235	M3-ISGhi
IDO1	8.97215e-48	0.951143	0.26	0.036	1.34376e-43	GBM.PD1	IDO1	0.224	M3-ISGhi
GBP1	4.708e-47	0.868871	0.649	0.381	7.05117e-43	GBM.PD1	GBP1	0.268	M3-ISGhi
GBP5	5.60984e-47	0.890742	0.384	0.117	8.40185e-43	GBM.PD1	GBP5	0.267	M3-ISGhi
DNAAF1	2.3327e-38	0.605915	0.287	0.07	3.49368e-34	GBM.PD1	DNAAF1	0.217	M3-ISGhi
CXCL11	1.61461e-36	0.807746	0.279	0.066	2.4182e-32	GBM.PD1	CXCL11	0.213	M3-ISGhi
CXCL10	4.06729e-34	0.752754	0.551	0.287	6.09158e-30	GBM.PD1	CXCL10	0.264	M3-ISGhi
PDK4	1.01413e-24	0.614874	0.563	0.343	1.51887e-20	GBM.PD1	PDK4	0.22	M3-ISGhi
CALHM6	1.13539e-24	0.602405	0.646	0.457	1.70047e-20	GBM.PD1	CALHM6	0.189	M3-ISGhi
IFITM1	0.00222827	0.761494	0.27	0.222	1	GBM.PD1	IFITM1	0.048	M3-ISGhi
SPP1	1.42731e-182	0.742811	0.982	0.893	2.13768e-178	GBM.new	SPP1	0.089	M4-HSPhi
G0S2	8.85894e-35	0.641221	0.419	0.296	1.3268e-30	GBM.new	G0S2	0.123	M4-HSPhi
HAMP	3.41736e-25	0.997558	0.4	0.333	5.11818e-21	GBM.new	HAMP	0.067	M4-HSPhi
DNAJA4	1.30577e-05	0.612483	0.464	0.491	0.195565	GBM.new	DNAJA4	-0.027	M4-HSPhi
NME2	1.37944e-170	0.970503	0.342	0.069	2.06599e-166	GBM.rec	NME2	0.273	M4-HSPhi
RNASEK	2.28156e-104	0.629157	0.403	0.151	3.4171e-100	GBM.rec	RNASEK	0.252	M4-HSPhi
ALDOA	2.73399e-103	0.691104	0.392	0.146	4.0947e-99	GBM.rec	ALDOA	0.246	M4-HSPhi
GABARAP	5.73057e-99	0.990217	0.626	0.367	8.58267e-95	GBM.rec	GABARAP	0.259	M4-HSPhi
IFITM3	1.13798e-63	0.587625	0.701	0.446	1.70435e-59	GBM.rec	IFITM3	0.255	M4-HSPhi
EEF1G	1.32808e-53	0.839406	0.282	0.127	1.98906e-49	GBM.rec	EEF1G	0.155	M4-HSPhi
LY6E	2.21424e-51	0.662746	0.46	0.261	3.31626e-47	GBM.rec	LY6E	0.199	M4-HSPhi
IFI6	5.26682e-43	0.715605	0.51	0.32	7.88812e-39	GBM.rec	IFI6	0.19	M4-HSPhi
ISG15	9.24191e-33	0.763329	0.46	0.297	1.38416e-28	GBM.rec	ISG15	0.163	M4-HSPhi
SELENOP	8.73766e-30	0.72129	0.359	0.218	1.30864e-25	GBM.rec	SELENOP	0.141	M4-HSPhi
CFD	1.483e-27	0.73609	0.492	0.357	2.22109e-23	GBM.rec	CFD	0.135	M4-HSPhi
IFI27	3.98559e-20	1.38151	0.29	0.202	5.96923e-16	GBM.rec	IFI27	0.088	M4-HSPhi
LYZ	2.26617e-19	1.35464	0.467	0.352	3.39404e-15	GBM.rec	LYZ	0.115	M4-HSPhi
ZFAND5	8.71709e-150	0.679736	0.758	0.487	1.30556e-145	GBM.PD1	ZFAND5	0.271	M4-HSPhi
PDK4	5.01418e-146	0.829225	0.634	0.318	7.50973e-142	GBM.PD1	PDK4	0.316	M4-HSPhi
CXCR4	5.35786e-122	0.663085	0.806	0.545	8.02446e-118	GBM.PD1	CXCR4	0.261	M4-HSPhi
HLA-DQA1	4.63727e-104	0.641998	0.8	0.624	6.94523e-100	GBM.PD1	HLA-DQA1	0.176	M4-HSPhi
CH25H	4.72886e-102	0.767545	0.535	0.276	7.08241e-98	GBM.PD1	CH25H	0.259	M4-HSPhi
CCL4L2	1.11991e-85	0.833753	0.708	0.481	1.67729e-81	GBM.PD1	CCL4L2	0.227	M4-HSPhi
NLRP3	1.12898e-78	0.632911	0.475	0.258	1.69088e-74	GBM.PD1	NLRP3	0.217	M4-HSPhi
CCL3L1	9.18976e-73	0.78991	0.674	0.46	1.37635e-68	GBM.PD1	CCL3L1	0.214	M4-HSPhi
CCL3	1.54868e-28	0.623604	0.838	0.756	2.31946e-24	GBM.PD1	CCL3	0.082	M4-HSPhi
HAMP	3.65803e-70	1.08907	0.476	0.358	5.47863e-66	GBM.new	HAMP	0.118	M5-CX3CR1-TMEM119-ADORA3
S100A8	1.72399e-35	0.864433	0.337	0.246	2.58202e-31	GBM.new	S100A8	0.091	M5-CX3CR1-TMEM119-ADORA3
CXCL8	2.01802e-26	0.691336	0.304	0.217	3.02238e-22	GBM.new	CXCL8	0.087	M5-CX3CR1-TMEM119-ADORA3
S100A9	1.86946e-21	0.694333	0.377	0.32	2.79989e-17	GBM.new	S100A9	0.057	M5-CX3CR1-TMEM119-ADORA3
IL1B	2.00104e-16	0.817863	0.392	0.35	2.99696e-12	GBM.new	IL1B	0.042	M5-CX3CR1-TMEM119-ADORA3
GPR183	2.12326e-15	0.596711	0.394	0.352	3.18001e-11	GBM.new	GPR183	0.042	M5-CX3CR1-TMEM119-ADORA3
NME2	0	1.13628	0.426	0.08	0	GBM.rec	NME2	0.346	M5-CX3CR1-TMEM119-ADORA3
RNASEK	1.87054e-204	0.799598	0.452	0.152	2.80151e-200	GBM.rec	RNASEK	0.3	M5-CX3CR1-TMEM119-ADORA3
GABARAP	2.87814e-196	1.10299	0.691	0.414	4.31059e-192	GBM.rec	GABARAP	0.277	M5-CX3CR1-TMEM119-ADORA3
MAN2B1	8.8237e-194	0.661524	0.412	0.125	1.32153e-189	GBM.rec	MAN2B1	0.287	M5-CX3CR1-TMEM119-ADORA3
EEF1G	4.265e-152	0.991825	0.372	0.135	6.38769e-148	GBM.rec	EEF1G	0.237	M5-CX3CR1-TMEM119-ADORA3
ALDOA	1.15111e-150	0.724732	0.43	0.171	1.72402e-146	GBM.rec	ALDOA	0.259	M5-CX3CR1-TMEM119-ADORA3
P2RY12	1.8237e-136	0.713988	0.434	0.184	2.73136e-132	GBM.rec	P2RY12	0.25	M5-CX3CR1-TMEM119-ADORA3
MRC1	1.71313e-90	0.712301	0.303	0.118	2.56576e-86	GBM.rec	MRC1	0.185	M5-CX3CR1-TMEM119-ADORA3
LYZ	3.13803e-11	1.31993	0.421	0.349	4.69982e-07	GBM.rec	LYZ	0.072	M5-CX3CR1-TMEM119-ADORA3
ISG15	1.49067e-10	0.684158	0.374	0.305	2.23257e-06	GBM.rec	ISG15	0.069	M5-CX3CR1-TMEM119-ADORA3
STAT1	6.76277e-121	0.689337	0.439	0.212	1.01286e-116	GBM.PD1	STAT1	0.227	M5-CX3CR1-TMEM119-ADORA3
GBP1	9.09218e-102	0.704585	0.274	0.099	1.36174e-97	GBM.PD1	GBP1	0.175	M5-CX3CR1-TMEM119-ADORA3
CXCR4	6.05926e-94	0.631145	0.681	0.467	9.07496e-90	GBM.PD1	CXCR4	0.214	M5-CX3CR1-TMEM119-ADORA3
HLA-DQA1	1.70362e-89	0.586744	0.783	0.666	2.5515e-85	GBM.PD1	HLA-DQA1	0.117	M5-CX3CR1-TMEM119-ADORA3
SPP1	7.29346e-134	0.846623	0.988	0.882	1.09234e-129	GBM.new	SPP1	0.106	M6-GPNMB-APOE-CD68-Mphage
G0S2	4.09678e-30	1.06617	0.42	0.272	6.13574e-26	GBM.new	G0S2	0.148	M6-GPNMB-APOE-CD68-Mphage
CLK1	1.43948e-08	0.63764	0.376	0.548	0.000215592	GBM.new	CLK1	-0.172	M6-GPNMB-APOE-CD68-Mphage
ABL2	2.00658e-05	0.59674	0.267	0.365	0.300525	GBM.new	ABL2	-0.098	M6-GPNMB-APOE-CD68-Mphage
S100A8	2.95591e-05	1.09326	0.39	0.389	0.442707	GBM.new	S100A8	0.001	M6-GPNMB-APOE-CD68-Mphage
PLAU	3.55975e-05	0.667862	0.257	0.352	0.533143	GBM.new	PLAU	-0.095	M6-GPNMB-APOE-CD68-Mphage
NAMPT	5.53895e-05	0.648861	0.568	0.75	0.829569	GBM.new	NAMPT	-0.182	M6-GPNMB-APOE-CD68-Mphage
HAMP	0.00900931	0.774361	0.391	0.4	1	GBM.new	HAMP	-0.009	M6-GPNMB-APOE-CD68-Mphage
NME2	4.98357e-93	1.02105	0.411	0.117	7.46389e-89	GBM.rec	NME2	0.294	M6-GPNMB-APOE-CD68-Mphage
RETN	2.1355e-79	1.01425	0.305	0.068	3.19834e-75	GBM.rec	RETN	0.237	M6-GPNMB-APOE-CD68-Mphage
RNASEK	1.30686e-70	0.720061	0.446	0.176	1.95728e-66	GBM.rec	RNASEK	0.27	M6-GPNMB-APOE-CD68-Mphage
GABARAP	6.79422e-49	0.922673	0.705	0.49	1.01757e-44	GBM.rec	GABARAP	0.215	M6-GPNMB-APOE-CD68-Mphage
ALDOA	1.26434e-45	0.730177	0.5	0.276	1.89361e-41	GBM.rec	ALDOA	0.224	M6-GPNMB-APOE-CD68-Mphage
EEF1G	5.78012e-43	0.855254	0.349	0.164	8.65689e-39	GBM.rec	EEF1G	0.185	M6-GPNMB-APOE-CD68-Mphage
MRC1	5.10784e-38	0.622434	0.4	0.187	7.65001e-34	GBM.rec	MRC1	0.213	M6-GPNMB-APOE-CD68-Mphage
IFI6	5.36234e-35	0.626638	0.691	0.477	8.03118e-31	GBM.rec	IFI6	0.214	M6-GPNMB-APOE-CD68-Mphage
LYZ	5.00048e-20	1.19797	0.671	0.54	7.48922e-16	GBM.rec	LYZ	0.131	M6-GPNMB-APOE-CD68-Mphage
CFD	1.0201e-15	0.608028	0.63	0.553	1.5278e-11	GBM.rec	CFD	0.077	M6-GPNMB-APOE-CD68-Mphage
ISG15	1.28281e-14	0.82887	0.556	0.409	1.92126e-10	GBM.rec	ISG15	0.147	M6-GPNMB-APOE-CD68-Mphage
IFI27	5.36947e-05	0.995134	0.272	0.225	0.804185	GBM.rec	IFI27	0.047	M6-GPNMB-APOE-CD68-Mphage
HLA-DQA1	1.78263e-146	0.947306	0.885	0.598	2.66985e-142	GBM.PD1	HLA-DQA1	0.287	M6-GPNMB-APOE-CD68-Mphage
HLA-DRB1	1.74294e-122	0.670111	0.964	0.85	2.61041e-118	GBM.PD1	HLA-DRB1	0.114	M6-GPNMB-APOE-CD68-Mphage
PDK4	5.83015e-73	0.622005	0.651	0.354	8.73181e-69	GBM.PD1	PDK4	0.297	M6-GPNMB-APOE-CD68-Mphage
GBP4	1.71981e-70	0.585497	0.285	0.071	2.57576e-66	GBM.PD1	GBP4	0.214	M6-GPNMB-APOE-CD68-Mphage
STAT1	3.21103e-67	0.730765	0.51	0.261	4.80916e-63	GBM.PD1	STAT1	0.249	M6-GPNMB-APOE-CD68-Mphage
SERPING1	6.413e-67	0.653726	0.493	0.234	9.60475e-63	GBM.PD1	SERPING1	0.259	M6-GPNMB-APOE-CD68-Mphage
VAMP5	6.50287e-41	0.606797	0.434	0.242	9.73934e-37	GBM.PD1	VAMP5	0.192	M6-GPNMB-APOE-CD68-Mphage
GBP1	1.28199e-37	0.715692	0.283	0.125	1.92004e-33	GBM.PD1	GBP1	0.158	M6-GPNMB-APOE-CD68-Mphage
CXCL8	2.32696e-64	0.80593	0.649	0.52	3.48509e-60	GBM.new	CXCL8	0.129	M7-VCAN-GPNMB-ANGPTL4-GlycoHi
G0S2	1.02546e-59	0.822555	0.488	0.32	1.53582e-55	GBM.new	G0S2	0.168	M7-VCAN-GPNMB-ANGPTL4-GlycoHi
CXCL3	1.16158e-41	0.901498	0.35	0.223	1.7397e-37	GBM.new	CXCL3	0.127	M7-VCAN-GPNMB-ANGPTL4-GlycoHi
CCL20	5.10334e-34	0.895815	0.299	0.188	7.64328e-30	GBM.new	CCL20	0.111	M7-VCAN-GPNMB-ANGPTL4-GlycoHi
FN1	6.22441e-34	1.02074	0.357	0.244	9.32231e-30	GBM.new	FN1	0.113	M7-VCAN-GPNMB-ANGPTL4-GlycoHi
VCAN	1.57286e-25	0.718293	0.476	0.41	2.35567e-21	GBM.new	VCAN	0.066	M7-VCAN-GPNMB-ANGPTL4-GlycoHi
CXCL2	5.88228e-23	0.676842	0.356	0.272	8.80989e-19	GBM.new	CXCL2	0.084	M7-VCAN-GPNMB-ANGPTL4-GlycoHi
IL1B	5.5022e-20	0.628883	0.496	0.439	8.24065e-16	GBM.new	IL1B	0.057	M7-VCAN-GPNMB-ANGPTL4-GlycoHi
NME2	1.32822e-190	0.889411	0.392	0.094	1.98927e-186	GBM.rec	NME2	0.298	M7-VCAN-GPNMB-ANGPTL4-GlycoHi
RNASEK	1.26529e-129	0.74988	0.425	0.164	1.89503e-125	GBM.rec	RNASEK	0.261	M7-VCAN-GPNMB-ANGPTL4-GlycoHi
GABARAP	7.37638e-105	0.872733	0.65	0.421	1.10476e-100	GBM.rec	GABARAP	0.229	M7-VCAN-GPNMB-ANGPTL4-GlycoHi
RETN	7.25815e-100	0.893607	0.263	0.075	1.08705e-95	GBM.rec	RETN	0.188	M7-VCAN-GPNMB-ANGPTL4-GlycoHi
ALDOA	1.7585e-82	0.92589	0.575	0.369	2.63371e-78	GBM.rec	ALDOA	0.206	M7-VCAN-GPNMB-ANGPTL4-GlycoHi
MIF	1.59765e-65	0.663792	0.81	0.627	2.3928e-61	GBM.rec	MIF	0.183	M7-VCAN-GPNMB-ANGPTL4-GlycoHi
MRC1	2.04084e-44	0.690633	0.44	0.291	3.05656e-40	GBM.rec	MRC1	0.149	M7-VCAN-GPNMB-ANGPTL4-GlycoHi
CFD	2.14184e-35	0.59398	0.517	0.402	3.20783e-31	GBM.rec	CFD	0.115	M7-VCAN-GPNMB-ANGPTL4-GlycoHi
MMP19	5.99238e-26	0.703108	0.4	0.281	8.97479e-22	GBM.rec	MMP19	0.119	M7-VCAN-GPNMB-ANGPTL4-GlycoHi
LYZ	5.85224e-19	0.84117	0.608	0.551	8.76491e-15	GBM.rec	LYZ	0.057	M7-VCAN-GPNMB-ANGPTL4-GlycoHi
GBP5	2.80179e-126	0.680915	0.256	0.058	4.19623e-122	GBM.PD1	GBP5	0.198	M7-VCAN-GPNMB-ANGPTL4-GlycoHi
STAT1	3.0847e-119	0.749239	0.469	0.223	4.61996e-115	GBM.PD1	STAT1	0.246	M7-VCAN-GPNMB-ANGPTL4-GlycoHi
HLA-C	9.3902e-110	0.58657	0.883	0.765	1.40637e-105	GBM.PD1	HLA-C	0.118	M7-VCAN-GPNMB-ANGPTL4-GlycoHi
RARRES3	1.22399e-92	0.617391	0.359	0.151	1.83317e-88	GBM.PD1	RARRES3	0.208	M7-VCAN-GPNMB-ANGPTL4-GlycoHi
FGL2	7.51427e-86	0.62841	0.511	0.301	1.12541e-81	GBM.PD1	FGL2	0.21	M7-VCAN-GPNMB-ANGPTL4-GlycoHi
GBP1	6.47813e-81	0.711383	0.29	0.114	9.70229e-77	GBM.PD1	GBP1	0.176	M7-VCAN-GPNMB-ANGPTL4-GlycoHi
SLC40A1	1.38314e-76	0.680772	0.272	0.102	2.07153e-72	GBM.PD1	SLC40A1	0.17	M7-VCAN-GPNMB-ANGPTL4-GlycoHi
HLA-DQA1	6.83389e-75	0.64794	0.65	0.462	1.02351e-70	GBM.PD1	HLA-DQA1	0.188	M7-VCAN-GPNMB-ANGPTL4-GlycoHi
PDK4	1.79536e-51	0.591779	0.48	0.298	2.68892e-47	GBM.PD1	PDK4	0.182	M7-VCAN-GPNMB-ANGPTL4-GlycoHi
CCL4L2	1.49861e-24	0.667766	0.463	0.347	2.24447e-20	GBM.PD1	CCL4L2	0.116	M7-VCAN-GPNMB-ANGPTL4-GlycoHi
SPP1	1.5848e-134	1.47305	0.891	0.604	2.37356e-130	GBM.new	SPP1	0.287	Mono-FCN1-S100A8-9-VCAN
G0S2	5.13751e-51	1.10872	0.659	0.439	7.69445e-47	GBM.new	G0S2	0.22	Mono-FCN1-S100A8-9-VCAN
CXCL8	4.92957e-48	1.08328	0.688	0.476	7.38301e-44	GBM.new	CXCL8	0.212	Mono-FCN1-S100A8-9-VCAN
CXCL3	5.73093e-40	1.32803	0.446	0.227	8.58322e-36	GBM.new	CXCL3	0.219	Mono-FCN1-S100A8-9-VCAN
CCL20	9.10628e-33	1.15942	0.424	0.227	1.36385e-28	GBM.new	CCL20	0.197	Mono-FCN1-S100A8-9-VCAN
CXCL2	1.14405e-26	0.933491	0.525	0.365	1.71345e-22	GBM.new	CXCL2	0.16	Mono-FCN1-S100A8-9-VCAN
CCL3	1.36912e-21	0.616355	0.651	0.527	2.05053e-17	GBM.new	CCL3	0.124	Mono-FCN1-S100A8-9-VCAN
PLIN2	1.79711e-19	0.966191	0.691	0.718	2.69153e-15	GBM.new	PLIN2	-0.027	Mono-FCN1-S100A8-9-VCAN
ALOX5AP	6.28877e-19	0.959521	0.636	0.597	9.41869e-15	GBM.new	ALOX5AP	0.039	Mono-FCN1-S100A8-9-VCAN
FCGBP	7.35713e-16	1.08109	0.268	0.152	1.10188e-11	GBM.new	FCGBP	0.116	Mono-FCN1-S100A8-9-VCAN
SLC16A10	3.69795e-15	0.743586	0.276	0.159	5.53842e-11	GBM.new	SLC16A10	0.117	Mono-FCN1-S100A8-9-VCAN
SEC61G	1.00818e-12	0.816802	0.614	0.656	1.50996e-08	GBM.new	SEC61G	-0.042	Mono-FCN1-S100A8-9-VCAN
TIMP1	7.78196e-10	0.683121	0.726	0.857	1.1655e-05	GBM.new	TIMP1	-0.131	Mono-FCN1-S100A8-9-VCAN
BAG3	7.55098e-07	0.695581	0.286	0.221	0.0113091	GBM.new	BAG3	0.065	Mono-FCN1-S100A8-9-VCAN
CTSL	9.83976e-06	0.749857	0.547	0.583	0.14737	GBM.new	CTSL	-0.036	Mono-FCN1-S100A8-9-VCAN
LDHA	2.97671e-05	0.625503	0.642	0.76	0.445822	GBM.new	LDHA	-0.118	Mono-FCN1-S100A8-9-VCAN
IL1RN	0.000749628	0.623124	0.326	0.291	1	GBM.new	IL1RN	0.035	Mono-FCN1-S100A8-9-VCAN
ERO1A	0.00238487	0.587614	0.295	0.273	1	GBM.new	ERO1A	0.022	Mono-FCN1-S100A8-9-VCAN
IL10	0.00961468	0.632505	0.286	0.261	1	GBM.new	IL10	0.025	Mono-FCN1-S100A8-9-VCAN
CFD	4.10898e-46	0.881654	0.754	0.591	6.15402e-42	GBM.rec	CFD	0.163	Mono-FCN1-S100A8-9-VCAN
LYZ	1.19402e-34	0.799182	0.907	0.835	1.78828e-30	GBM.rec	LYZ	0.072	Mono-FCN1-S100A8-9-VCAN
THBS1	3.20423e-27	0.682259	0.69	0.567	4.79897e-23	GBM.rec	THBS1	0.123	Mono-FCN1-S100A8-9-VCAN
MRC1	5.33992e-23	0.813469	0.358	0.211	7.99759e-19	GBM.rec	MRC1	0.147	Mono-FCN1-S100A8-9-VCAN
RETN	2.40463e-17	0.922507	0.468	0.333	3.60142e-13	GBM.rec	RETN	0.135	Mono-FCN1-S100A8-9-VCAN
IL1R2	0.00108738	0.601659	0.379	0.333	1	GBM.rec	IL1R2	0.046	Mono-FCN1-S100A8-9-VCAN
RARRES3	1.24284e-126	0.962705	0.6	0.187	1.8614e-122	GBM.PD1	RARRES3	0.413	Mono-FCN1-S100A8-9-VCAN
VAMP5	2.13781e-120	1.07618	0.719	0.337	3.2018e-116	GBM.PD1	VAMP5	0.382	Mono-FCN1-S100A8-9-VCAN
SERPING1	4.64481e-113	0.985187	0.468	0.1	6.95653e-109	GBM.PD1	SERPING1	0.368	Mono-FCN1-S100A8-9-VCAN
GBP5	2.98892e-110	1.17875	0.453	0.098	4.47651e-106	GBM.PD1	GBP5	0.355	Mono-FCN1-S100A8-9-VCAN
HLA-DQA1	2.91309e-108	1.09893	0.755	0.408	4.36294e-104	GBM.PD1	HLA-DQA1	0.347	Mono-FCN1-S100A8-9-VCAN
HLA-DRB1	4.76887e-105	0.771547	0.955	0.779	7.14233e-101	GBM.PD1	HLA-DRB1	0.176	Mono-FCN1-S100A8-9-VCAN
STAT1	3.52197e-103	1.0399	0.608	0.253	5.27485e-99	GBM.PD1	STAT1	0.355	Mono-FCN1-S100A8-9-VCAN
HLA-DPA1	2.23844e-100	0.804578	0.925	0.715	3.35251e-96	GBM.PD1	HLA-DPA1	0.21	Mono-FCN1-S100A8-9-VCAN
CXCL9	2.42504e-99	1.82426	0.261	0.006	3.63198e-95	GBM.PD1	CXCL9	0.255	Mono-FCN1-S100A8-9-VCAN
PSME2	5.1898e-96	0.905328	0.786	0.522	7.77276e-92	GBM.PD1	PSME2	0.264	Mono-FCN1-S100A8-9-VCAN
GBP1	3.80217e-94	1.41315	0.476	0.14	5.69451e-90	GBM.PD1	GBP1	0.336	Mono-FCN1-S100A8-9-VCAN
EPSTI1	2.80347e-91	0.689113	0.555	0.199	4.19876e-87	GBM.PD1	EPSTI1	0.356	Mono-FCN1-S100A8-9-VCAN
PSMB9	3.95916e-91	0.707646	0.729	0.414	5.92963e-87	GBM.PD1	PSMB9	0.315	Mono-FCN1-S100A8-9-VCAN
HLA-DQB1	4.7164e-88	0.688494	0.855	0.574	7.06375e-84	GBM.PD1	HLA-DQB1	0.281	Mono-FCN1-S100A8-9-VCAN
UBE2L6	2.14865e-86	0.71045	0.629	0.292	3.21803e-82	GBM.PD1	UBE2L6	0.337	Mono-FCN1-S100A8-9-VCAN
TAP1	1.03752e-84	0.732811	0.514	0.183	1.55389e-80	GBM.PD1	TAP1	0.331	Mono-FCN1-S100A8-9-VCAN
CALHM6	2.75715e-83	0.87107	0.619	0.285	4.12939e-79	GBM.PD1	CALHM6	0.334	Mono-FCN1-S100A8-9-VCAN
HLA-DPB1	3.44301e-83	0.762588	0.903	0.716	5.1566e-79	GBM.PD1	HLA-DPB1	0.187	Mono-FCN1-S100A8-9-VCAN
IRF1	3.60887e-83	0.97633	0.634	0.304	5.405e-79	GBM.PD1	IRF1	0.33	Mono-FCN1-S100A8-9-VCAN
CXCL10	7.0687e-81	2.05841	0.267	0.025	1.05868e-76	GBM.PD1	CXCL10	0.242	Mono-FCN1-S100A8-9-VCAN
IFITM1	5.15751e-80	1.20099	0.323	0.053	7.7244e-76	GBM.PD1	IFITM1	0.27	Mono-FCN1-S100A8-9-VCAN
LAP3	4.29011e-79	0.71527	0.692	0.402	6.4253e-75	GBM.PD1	LAP3	0.29	Mono-FCN1-S100A8-9-VCAN
LY6E	2.55398e-78	0.66986	0.674	0.335	3.82509e-74	GBM.PD1	LY6E	0.339	Mono-FCN1-S100A8-9-VCAN
GBP4	1.52903e-76	0.825376	0.384	0.1	2.29003e-72	GBM.PD1	GBP4	0.284	Mono-FCN1-S100A8-9-VCAN
CXCR4	6.51733e-76	0.639224	0.812	0.501	9.761e-72	GBM.PD1	CXCR4	0.311	Mono-FCN1-S100A8-9-VCAN
CD74	6.56301e-73	0.926721	0.975	0.91	9.82942e-69	GBM.PD1	CD74	0.065	Mono-FCN1-S100A8-9-VCAN
ANKRD22	4.6224e-71	0.603745	0.361	0.093	6.92296e-67	GBM.PD1	ANKRD22	0.268	Mono-FCN1-S100A8-9-VCAN
IFITM3	1.0107e-63	0.846732	0.793	0.56	1.51372e-59	GBM.PD1	IFITM3	0.233	Mono-FCN1-S100A8-9-VCAN
FGL2	3.0739e-60	0.631809	0.743	0.468	4.60378e-56	GBM.PD1	FGL2	0.275	Mono-FCN1-S100A8-9-VCAN
PPA1	2.35437e-56	0.606342	0.58	0.306	3.52614e-52	GBM.PD1	PPA1	0.274	Mono-FCN1-S100A8-9-VCAN
WARS	1.18504e-50	0.749275	0.595	0.336	1.77484e-46	GBM.PD1	WARS	0.259	Mono-FCN1-S100A8-9-VCAN
RNASEK	2.15879e-41	0.664749	0.425	0.2	3.23322e-37	GBM.PD1	RNASEK	0.225	Mono-FCN1-S100A8-9-VCAN
NME2	1.84189e-30	0.656744	0.312	0.139	2.75861e-26	GBM.PD1	NME2	0.173	Mono-FCN1-S100A8-9-VCAN
GABARAP	3.22447e-30	0.654872	0.634	0.441	4.82929e-26	GBM.PD1	GABARAP	0.193	Mono-FCN1-S100A8-9-VCAN
SPP1	6.89515e-126	1.64989	0.897	0.71	1.03269e-121	GBM.new	SPP1	0.187	DC
G0S2	2.40404e-20	1.13493	0.412	0.277	3.60053e-16	GBM.new	G0S2	0.135	DC
FCGBP	1.60934e-11	1.08437	0.325	0.23	2.41031e-07	GBM.new	FCGBP	0.095	DC
ACSL1	1.13463e-06	0.660457	0.398	0.587	0.0169933	GBM.new	ACSL1	-0.189	DC
SORL1	0.000368259	0.624973	0.317	0.445	1	GBM.new	SORL1	-0.128	DC
CD163	0.000563973	0.691969	0.426	0.605	1	GBM.new	CD163	-0.179	DC
S100A9	0.000762677	0.791447	0.272	0.237	1	GBM.new	S100A9	0.035	DC
GABARAP	7.13914e-26	0.691511	0.629	0.474	1.06923e-21	GBM.rec	GABARAP	0.155	DC
EEF1G	3.52613e-20	0.928197	0.371	0.235	5.28108e-16	GBM.rec	EEF1G	0.136	DC
IFI6	9.41633e-15	0.719391	0.536	0.409	1.41028e-10	GBM.rec	IFI6	0.127	DC
ISG15	4.3194e-05	0.828016	0.471	0.419	0.646917	GBM.rec	ISG15	0.052	DC
VAMP5	6.10242e-85	0.842359	0.606	0.309	9.13959e-81	GBM.PD1	VAMP5	0.297	DC
STAT1	1.88843e-83	0.726019	0.556	0.249	2.8283e-79	GBM.PD1	STAT1	0.307	DC
CXCL9	1.8474e-82	1.6413	0.251	0.019	2.76685e-78	GBM.PD1	CXCL9	0.232	DC
IDO1	3.31739e-79	1.39777	0.301	0.049	4.96845e-75	GBM.PD1	IDO1	0.252	DC
GBP5	1.26218e-73	0.673733	0.301	0.057	1.89036e-69	GBM.PD1	GBP5	0.244	DC
PSME2	1.28938e-66	0.708306	0.786	0.551	1.9311e-62	GBM.PD1	PSME2	0.235	DC
GBP4	5.19342e-56	0.604731	0.375	0.142	7.77818e-52	GBM.PD1	GBP4	0.233	DC
RARRES3	6.14945e-56	0.61347	0.525	0.281	9.21004e-52	GBM.PD1	RARRES3	0.244	DC
GBP1	8.39866e-54	1.01974	0.393	0.165	1.25787e-49	GBM.PD1	GBP1	0.228	DC
IRF1	1.74069e-43	0.595953	0.513	0.292	2.60704e-39	GBM.PD1	IRF1	0.221	DC
WARS	3.34352e-43	0.768789	0.445	0.24	5.0076e-39	GBM.PD1	WARS	0.205	DC
TXN	8.02436e-35	0.761839	0.68	0.466	1.20181e-30	GBM.PD1	TXN	0.214	DC
G0S2	1.15677e-99	1.20731	0.506	0.298	1.73249e-95	GBM.new	G0S2	0.208	Proliferating
CXCL8	9.04163e-47	1.05024	0.453	0.334	1.35417e-42	GBM.new	CXCL8	0.119	Proliferating
GRASP	6.57177e-37	0.594759	0.212	0.373	9.84253e-33	GBM.new	GRASP	-0.161	Proliferating
CCL20	1.39271e-28	1.08206	0.261	0.163	2.08587e-24	GBM.new	CCL20	0.098	Proliferating
ELL2	5.64655e-24	0.738177	0.391	0.565	8.45683e-20	GBM.new	ELL2	-0.174	Proliferating
DNAJB6	1.5683e-22	0.591177	0.43	0.629	2.34884e-18	GBM.new	DNAJB6	-0.199	Proliferating
SERPINB9	5.04229e-21	0.708883	0.384	0.551	7.55184e-17	GBM.new	SERPINB9	-0.167	Proliferating
ACSL1	1.06563e-20	0.934141	0.424	0.608	1.59599e-16	GBM.new	ACSL1	-0.184	Proliferating
IL1B	8.41287e-19	0.737015	0.531	0.509	1.26e-14	GBM.new	IL1B	0.022	Proliferating
FN1	2.66099e-15	0.906518	0.326	0.262	3.98537e-11	GBM.new	FN1	0.064	Proliferating
WTAP	2.06534e-11	0.728222	0.332	0.461	3.09326e-07	GBM.new	WTAP	-0.129	Proliferating
CLK1	2.4105e-11	0.647349	0.387	0.524	3.6102e-07	GBM.new	CLK1	-0.137	Proliferating
ICAM1	3.32162e-11	0.589074	0.287	0.396	4.9748e-07	GBM.new	ICAM1	-0.109	Proliferating
VCAN	1.2263e-09	0.849092	0.259	0.218	1.83662e-05	GBM.new	VCAN	0.041	Proliferating
PFKFB3	3.58976e-08	0.863155	0.34	0.452	0.000537639	GBM.new	PFKFB3	-0.112	Proliferating
TNFAIP3	1.39306e-06	0.6084	0.428	0.561	0.0208639	GBM.new	TNFAIP3	-0.133	Proliferating
CD83	4.1341e-06	0.594118	0.484	0.629	0.0619165	GBM.new	CD83	-0.145	Proliferating
NAMPT	5.36911e-06	1.04862	0.591	0.675	0.0804131	GBM.new	NAMPT	-0.084	Proliferating
HIF1A	6.99851e-06	0.644586	0.524	0.686	0.104817	GBM.new	HIF1A	-0.162	Proliferating
ABL2	3.64704e-05	0.712177	0.286	0.369	0.546217	GBM.new	ABL2	-0.083	Proliferating
OLR1	4.53436e-05	0.622	0.492	0.634	0.679111	GBM.new	OLR1	-0.142	Proliferating
PLAUR	0.000784048	0.85322	0.596	0.71	1	GBM.new	PLAUR	-0.114	Proliferating
LMNA	0.000935402	0.829565	0.381	0.412	1	GBM.new	LMNA	-0.031	Proliferating
VEGFA	0.00115862	0.618265	0.305	0.361	1	GBM.new	VEGFA	-0.056	Proliferating
BCL2A1	0.00551951	0.730817	0.437	0.556	1	GBM.new	BCL2A1	-0.119	Proliferating
NME2	1.06801e-194	1.14507	0.467	0.129	1.59956e-190	GBM.rec	NME2	0.338	Proliferating
GABARAP	2.68755e-128	1.04647	0.686	0.419	4.02514e-124	GBM.rec	GABARAP	0.267	Proliferating
C1QC	1.18005e-105	0.622174	0.892	0.688	1.76737e-101	GBM.rec	C1QC	0.204	Proliferating
ALDOA	7.66843e-102	0.844294	0.594	0.324	1.1485e-97	GBM.rec	ALDOA	0.27	Proliferating
RNASEK	1.40255e-96	0.617185	0.423	0.18	2.10059e-92	GBM.rec	RNASEK	0.243	Proliferating
MIF	1.97683e-88	0.881206	0.73	0.466	2.9607e-84	GBM.rec	MIF	0.264	Proliferating
IFITM3	2.86033e-71	0.616006	0.751	0.511	4.28392e-67	GBM.rec	IFITM3	0.24	Proliferating
LY6E	3.65402e-56	0.759167	0.586	0.378	5.47263e-52	GBM.rec	LY6E	0.208	Proliferating
EEF1G	1.32527e-55	0.705904	0.36	0.182	1.98486e-51	GBM.rec	EEF1G	0.178	Proliferating
IFI6	3.64212e-44	0.86881	0.611	0.427	5.4548e-40	GBM.rec	IFI6	0.184	Proliferating
ISG15	1.56132e-18	1.07657	0.511	0.407	2.3384e-14	GBM.rec	ISG15	0.104	Proliferating
LYZ	4.10915e-14	1.26413	0.6	0.489	6.15427e-10	GBM.rec	LYZ	0.111	Proliferating
CFD	2.71123e-13	0.752032	0.384	0.302	4.06061e-09	GBM.rec	CFD	0.082	Proliferating
STAT1	2.35113e-200	1.03393	0.59	0.239	3.52128e-196	GBM.PD1	STAT1	0.351	Proliferating
GBP4	3.3861e-176	0.685501	0.367	0.086	5.07136e-172	GBM.PD1	GBP4	0.281	Proliferating
GBP5	4.21033e-175	0.849337	0.296	0.049	6.30581e-171	GBM.PD1	GBP5	0.247	Proliferating
HLA-DQA1	8.34855e-162	0.803619	0.789	0.484	1.25036e-157	GBM.PD1	HLA-DQA1	0.305	Proliferating
FGL2	1.91477e-151	0.681317	0.663	0.359	2.86775e-147	GBM.PD1	FGL2	0.304	Proliferating
RARRES3	7.81683e-149	0.796198	0.536	0.234	1.17073e-144	GBM.PD1	RARRES3	0.302	Proliferating
GBP1	3.06291e-144	1.09145	0.427	0.151	4.58732e-140	GBM.PD1	GBP1	0.276	Proliferating
IRF1	2.49188e-127	0.626149	0.489	0.211	3.73209e-123	GBM.PD1	IRF1	0.278	Proliferating
SERPING1	4.79093e-124	0.659786	0.425	0.157	7.17538e-120	GBM.PD1	SERPING1	0.268	Proliferating
TAP1	1.6414e-121	0.585169	0.468	0.2	2.45833e-117	GBM.PD1	TAP1	0.268	Proliferating
ISG20	5.77183e-111	0.623678	0.367	0.127	8.64447e-107	GBM.PD1	ISG20	0.24	Proliferating
PSME2	1.72865e-96	0.628142	0.777	0.537	2.58899e-92	GBM.PD1	PSME2	0.24	Proliferating
VAMP5	4.28202e-89	0.854578	0.512	0.283	6.41318e-85	GBM.PD1	VAMP5	0.229	Proliferating
WARS	1.66377e-73	0.616456	0.385	0.187	2.49183e-69	GBM.PD1	WARS	0.198	Proliferating
CCL5	3.78842e-48	0.590789	0.279	0.129	5.67392e-44	GBM.PD1	CCL5	0.15	Proliferating
