# Supplementary material for: Neoadjuvant PD-1 blockade induces T cell and cDC1 activation but fails to overcome the immunosuppressive tumor associated macrophages in recurrent glioblastoma
Source: Research Square preprint supplement (doi:10.21203/rs.3.rs-793187/v1), 2021-08-13
Supplement: Supplementary file 7 [file SuppTable7-CyTOF-myeloid-DiffMarkersinClusters.xlsx]

## Sheet: Data_transformed_TIL_myeloid
Supplementary Table 7 CyTOF myeloid compartment Differential Markers in Clusters between GBM.rec and GBM.pembro
Marker	Cluster	GBM.rec	GBM.pembro	pVal	pVal.Adj	changes	fold change
CD14	1	0.499284	0.598994	0.00636708	0.0891391	increase in pembro	1.1997
CD274	1	0.0707714	0.451892	0.00161366	0.0242049	increase in pembro	6.38523
CD56	1	0.0157979	0.163519	0.042149	0.192138	increase in pembro	10.3507
CD14	2	0.353229	0.573907	0.042149	0.192138	increase in pembro	1.62474
CD14	3	0.0234643	0.207647	0.042149	0.192138	increase in pembro	8.84947
CD39	3	0.545995	0.485631	0.0240173	0.192138	decrease in pembro	0.889442
CD45RO	3	0.00202535	0.125528	0.0196516	0.176865	increase in pembro	61.9785
CD14	4	0.0123185	0.234242	0.0291772	0.192138	increase in pembro	19.0154
CD39	4	0.534842	0.452086	0.00636708	0.0891391	decrease in pembro	0.84527
CD45RO	4	0.00189868	0.111023	0.0128467	0.128467	increase in pembro	58.4737
CD14	5	0.00142896	0.114536	0.00636708	0.0891391	increase in pembro	80.153
CD45RO	5	0.0926247	0.232152	0.0240173	0.192138	increase in pembro	2.50637
CD14	7	0.0912473	0.233477	0.0240173	0.192138	increase in pembro	2.55872
CD274	7	0.243333	0.462261	0.00812459	0.0893705	increase in pembro	1.89971
CD39	7	0.709684	0.639117	0.042149	0.192138	decrease in pembro	0.900564
