# Supplementary material for: Neoadjuvant PD-1 blockade induces T cell and cDC1 activation but fails to overcome the immunosuppressive tumor associated macrophages in recurrent glioblastoma
Source: Research Square preprint supplement (doi:10.21203/rs.3.rs-793187/v1), 2021-08-13
Supplement: Supplementary file 8 [file SuppTable8-scRNAseq-monocyte.xlsx]

## Sheet: Markers
Gene	p_val	avg_logFC	pct.1	pct.2	p_val_adj	cluster	gene
S100A9	2.22514e-101	1.18805	0.978	0.818	2.79055e-97	FCN1-SELL-S100A8-9-Mono1	S100A9
S100A12	5.95625e-95	1.3424	0.694	0.302	7.46973e-91	FCN1-SELL-S100A8-9-Mono1	S100A12
S100A8	1.23159e-94	1.05064	0.958	0.765	1.54453e-90	FCN1-SELL-S100A8-9-Mono1	S100A8
FCN1	9.28376e-79	0.813784	0.851	0.544	1.16428e-74	FCN1-SELL-S100A8-9-Mono1	FCN1
S100A4	2.40521e-74	0.576333	0.978	0.835	3.01637e-70	FCN1-SELL-S100A8-9-Mono1	S100A4
S100A6	1.05671e-63	0.522392	0.985	0.871	1.32522e-59	FCN1-SELL-S100A8-9-Mono1	S100A6
LYZ	7.2804e-58	0.46084	0.969	0.826	9.13034e-54	FCN1-SELL-S100A8-9-Mono1	LYZ
CFP	1.53187e-52	0.685608	0.615	0.328	1.92112e-48	FCN1-SELL-S100A8-9-Mono1	CFP
CSTA	3.86038e-44	0.584955	0.788	0.611	4.8413e-40	FCN1-SELL-S100A8-9-Mono1	CSTA
TSPO	1.1339e-42	0.490377	0.919	0.772	1.42203e-38	FCN1-SELL-S100A8-9-Mono1	TSPO
RBP7	1.46206e-39	0.695756	0.494	0.253	1.83357e-35	FCN1-SELL-S100A8-9-Mono1	RBP7
SELL	1.60767e-36	0.581672	0.467	0.238	2.01618e-32	FCN1-SELL-S100A8-9-Mono1	SELL
CD55	1.95267e-36	0.607948	0.754	0.605	2.44884e-32	FCN1-SELL-S100A8-9-Mono1	CD55
CTSS	2.49315e-36	0.484536	0.913	0.8	3.12665e-32	FCN1-SELL-S100A8-9-Mono1	CTSS
TKT	2.57609e-36	0.462283	0.817	0.662	3.23067e-32	FCN1-SELL-S100A8-9-Mono1	TKT
SERPINB1	2.72878e-36	0.506205	0.823	0.676	3.42216e-32	FCN1-SELL-S100A8-9-Mono1	SERPINB1
TALDO1	3.16971e-36	0.488061	0.791	0.644	3.97513e-32	FCN1-SELL-S100A8-9-Mono1	TALDO1
GMFG	6.61956e-31	0.353224	0.871	0.721	8.30159e-27	FCN1-SELL-S100A8-9-Mono1	GMFG
IL1R2	7.87278e-31	0.871075	0.511	0.301	9.87325e-27	FCN1-SELL-S100A8-9-Mono1	IL1R2
METTL9	9.34106e-30	0.476991	0.557	0.377	1.17146e-25	FCN1-SELL-S100A8-9-Mono1	METTL9
AHNAK	4.23315e-29	0.543303	0.623	0.44	5.30879e-25	FCN1-SELL-S100A8-9-Mono1	AHNAK
MNDA	7.57555e-29	0.536324	0.718	0.575	9.5005e-25	FCN1-SELL-S100A8-9-Mono1	MNDA
THBS1	1.37749e-28	0.638478	0.752	0.564	1.72751e-24	FCN1-SELL-S100A8-9-Mono1	THBS1
MGST1	3.98816e-28	0.393615	0.321	0.134	5.00155e-24	FCN1-SELL-S100A8-9-Mono1	MGST1
FGR	1.68166e-26	0.375596	0.713	0.56	2.10897e-22	FCN1-SELL-S100A8-9-Mono1	FGR
ICAM3	1.13037e-24	0.454696	0.542	0.355	1.41759e-20	FCN1-SELL-S100A8-9-Mono1	ICAM3
EMP3	1.48917e-24	0.335595	0.871	0.76	1.86756e-20	FCN1-SELL-S100A8-9-Mono1	EMP3
PLBD1	1.95015e-24	0.580229	0.587	0.419	2.44568e-20	FCN1-SELL-S100A8-9-Mono1	PLBD1
EVI2B	2.15899e-24	0.37506	0.684	0.553	2.70759e-20	FCN1-SELL-S100A8-9-Mono1	EVI2B
RIPOR2	3.93102e-23	0.47592	0.455	0.263	4.92989e-19	FCN1-SELL-S100A8-9-Mono1	RIPOR2
PPIF	1.01093e-22	0.551996	0.66	0.517	1.2678e-18	FCN1-SELL-S100A8-9-Mono1	PPIF
CLEC4E	7.17492e-22	0.378199	0.608	0.426	8.99806e-18	FCN1-SELL-S100A8-9-Mono1	CLEC4E
NUP214	1.33223e-21	0.371987	0.553	0.388	1.67075e-17	FCN1-SELL-S100A8-9-Mono1	NUP214
GCA	1.33408e-20	0.376569	0.635	0.489	1.67307e-16	FCN1-SELL-S100A8-9-Mono1	GCA
EHD1	9.60233e-19	0.38622	0.453	0.297	1.20423e-14	FCN1-SELL-S100A8-9-Mono1	EHD1
AP1S2	1.54412e-18	0.357283	0.64	0.533	1.93648e-14	FCN1-SELL-S100A8-9-Mono1	AP1S2
AGTRAP	1.69881e-18	0.415398	0.604	0.484	2.13048e-14	FCN1-SELL-S100A8-9-Mono1	AGTRAP
SULT1A1	5.81346e-18	0.371933	0.334	0.184	7.29066e-14	FCN1-SELL-S100A8-9-Mono1	SULT1A1
CD93	1.37628e-17	0.359536	0.606	0.48	1.72599e-13	FCN1-SELL-S100A8-9-Mono1	CD93
LILRA5	7.38301e-17	0.393396	0.452	0.299	9.25903e-13	FCN1-SELL-S100A8-9-Mono1	LILRA5
CKAP4	1.40302e-16	0.341749	0.311	0.172	1.75952e-12	FCN1-SELL-S100A8-9-Mono1	CKAP4
PLP2	1.62534e-16	0.416571	0.577	0.45	2.03833e-12	FCN1-SELL-S100A8-9-Mono1	PLP2
CCDC69	8.56372e-15	0.366824	0.431	0.305	1.07398e-10	FCN1-SELL-S100A8-9-Mono1	CCDC69
MPEG1	1.88531e-14	0.374203	0.538	0.412	2.36437e-10	FCN1-SELL-S100A8-9-Mono1	MPEG1
SMAP2	3.30371e-14	0.327183	0.659	0.573	4.14318e-10	FCN1-SELL-S100A8-9-Mono1	SMAP2
C19orf38	3.43158e-14	0.340713	0.48	0.341	4.30354e-10	FCN1-SELL-S100A8-9-Mono1	C19orf38
PNP	8.73189e-14	0.391642	0.472	0.353	1.09507e-09	FCN1-SELL-S100A8-9-Mono1	PNP
CLEC12A	2.36862e-13	0.323942	0.428	0.303	2.97048e-09	FCN1-SELL-S100A8-9-Mono1	CLEC12A
DUSP6	3.21234e-13	0.439424	0.523	0.398	4.0286e-09	FCN1-SELL-S100A8-9-Mono1	DUSP6
MAP2K3	6.92906e-13	0.32852	0.475	0.358	8.68974e-09	FCN1-SELL-S100A8-9-Mono1	MAP2K3
MIDN	2.04075e-12	0.341213	0.576	0.481	2.5593e-08	FCN1-SELL-S100A8-9-Mono1	MIDN
SNHG25	1.29881e-11	0.329475	0.314	0.201	1.62884e-07	FCN1-SELL-S100A8-9-Mono1	SNHG25
CAST	2.15197e-11	0.350864	0.643	0.58	2.69878e-07	FCN1-SELL-S100A8-9-Mono1	CAST
LGALS2	3.59158e-11	0.373262	0.277	0.165	4.5042e-07	FCN1-SELL-S100A8-9-Mono1	LGALS2
PGD	4.34903e-11	0.34281	0.577	0.473	5.45411e-07	FCN1-SELL-S100A8-9-Mono1	PGD
LRG1	1.04685e-09	0.336083	0.263	0.162	1.31285e-05	FCN1-SELL-S100A8-9-Mono1	LRG1
CD300E	1.37744e-09	0.416854	0.431	0.325	1.72745e-05	FCN1-SELL-S100A8-9-Mono1	CD300E
TLR2	4.25673e-09	0.32914	0.611	0.553	5.33837e-05	FCN1-SELL-S100A8-9-Mono1	TLR2
ITGAX	4.4379e-09	0.330169	0.587	0.511	5.56558e-05	FCN1-SELL-S100A8-9-Mono1	ITGAX
POLE4	1.41897e-08	0.338642	0.504	0.436	0.000177953	FCN1-SELL-S100A8-9-Mono1	POLE4
TRMT6	4.48228e-07	0.362917	0.265	0.19	0.00562122	FCN1-SELL-S100A8-9-Mono1	TRMT6
ASPH	1.04859e-06	0.334908	0.402	0.332	0.0131504	FCN1-SELL-S100A8-9-Mono1	ASPH
CRIP1	5.30294e-06	0.401898	0.289	0.217	0.0665041	FCN1-SELL-S100A8-9-Mono1	CRIP1
CD48	2.03707e-25	0.653117	0.691	0.49	2.55469e-21	LILRB2-CD48-ITGAL-Mono2	CD48
POU2F2	5.5663e-24	0.508069	0.521	0.282	6.9807e-20	LILRB2-CD48-ITGAL-Mono2	POU2F2
CYTIP	2.60192e-23	0.707435	0.599	0.391	3.26307e-19	LILRB2-CD48-ITGAL-Mono2	CYTIP
LILRB2	6.89568e-22	0.732394	0.611	0.435	8.64787e-18	LILRB2-CD48-ITGAL-Mono2	LILRB2
LST1	1.81538e-21	0.673533	0.823	0.771	2.27667e-17	LILRB2-CD48-ITGAL-Mono2	LST1
ITGAL	3.94433e-20	0.36763	0.369	0.177	4.94659e-16	LILRB2-CD48-ITGAL-Mono2	ITGAL
ABI3	5.96626e-19	0.426205	0.491	0.292	7.48228e-15	LILRB2-CD48-ITGAL-Mono2	ABI3
NAP1L1	5.1049e-18	0.533816	0.738	0.61	6.40206e-14	LILRB2-CD48-ITGAL-Mono2	NAP1L1
TESC	7.33973e-18	0.343463	0.284	0.126	9.20476e-14	LILRB2-CD48-ITGAL-Mono2	TESC
BIRC3	8.27295e-17	0.431873	0.389	0.207	1.03751e-12	LILRB2-CD48-ITGAL-Mono2	BIRC3
EVL	1.22474e-16	0.412217	0.464	0.273	1.53595e-12	LILRB2-CD48-ITGAL-Mono2	EVL
LILRA1	1.38976e-16	0.348858	0.302	0.144	1.7429e-12	LILRB2-CD48-ITGAL-Mono2	LILRA1
CFP1	1.42113e-16	0.341701	0.569	0.359	1.78224e-12	LILRB2-CD48-ITGAL-Mono2	CFP
2020-09-09	1.89187e-16	0.463927	0.524	0.349	2.37259e-12	LILRB2-CD48-ITGAL-Mono2	2020-09-09
TCF7L2	3.51055e-16	0.374972	0.297	0.144	4.40258e-12	LILRB2-CD48-ITGAL-Mono2	TCF7L2
LYST	4.57767e-16	0.398383	0.484	0.298	5.74086e-12	LILRB2-CD48-ITGAL-Mono2	LYST
SLC2A6	8.93041e-16	0.35732	0.282	0.133	1.11996e-11	LILRB2-CD48-ITGAL-Mono2	SLC2A6
LIMD2	1.08048e-15	0.429272	0.608	0.419	1.35503e-11	LILRB2-CD48-ITGAL-Mono2	LIMD2
ITGA4	1.48985e-15	0.466599	0.367	0.2	1.86842e-11	LILRB2-CD48-ITGAL-Mono2	ITGA4
IFITM2	6.17789e-15	0.467604	0.791	0.686	7.74769e-11	LILRB2-CD48-ITGAL-Mono2	IFITM2
LRRC25	8.45734e-15	0.445424	0.474	0.312	1.06064e-10	LILRB2-CD48-ITGAL-Mono2	LRRC25
WARS	1.37289e-14	0.57385	0.566	0.409	1.72174e-10	LILRB2-CD48-ITGAL-Mono2	WARS
ITM2B	2.41859e-14	0.345706	0.848	0.828	3.03315e-10	LILRB2-CD48-ITGAL-Mono2	ITM2B
LILRA51	9.64967e-14	0.447924	0.461	0.31	1.21017e-09	LILRB2-CD48-ITGAL-Mono2	LILRA5
RHOC	2.12519e-13	0.448906	0.419	0.266	2.6652e-09	LILRB2-CD48-ITGAL-Mono2	RHOC
ADGRE5	2.32383e-13	0.36303	0.596	0.426	2.91432e-09	LILRB2-CD48-ITGAL-Mono2	ADGRE5
IFITM3	3.03594e-13	0.457778	0.761	0.627	3.80737e-09	LILRB2-CD48-ITGAL-Mono2	IFITM3
SELPLG	4.8837e-13	0.322925	0.439	0.282	6.12464e-09	LILRB2-CD48-ITGAL-Mono2	SELPLG
PAG1	5.51144e-13	0.487376	0.534	0.377	6.91189e-09	LILRB2-CD48-ITGAL-Mono2	PAG1
NAAA	1.04189e-12	0.330273	0.426	0.268	1.30664e-08	LILRB2-CD48-ITGAL-Mono2	NAAA
RNF144B	2.03658e-12	0.506036	0.576	0.443	2.55408e-08	LILRB2-CD48-ITGAL-Mono2	RNF144B
BIN2	3.17009e-12	0.326225	0.529	0.363	3.97561e-08	LILRB2-CD48-ITGAL-Mono2	BIN2
SPN	4.55165e-12	0.377954	0.327	0.189	5.70822e-08	LILRB2-CD48-ITGAL-Mono2	SPN
TNFSF10	1.0491e-11	0.524643	0.421	0.267	1.31568e-07	LILRB2-CD48-ITGAL-Mono2	TNFSF10
TSC22D3	3.23953e-11	0.390972	0.771	0.697	4.0627e-07	LILRB2-CD48-ITGAL-Mono2	TSC22D3
PILRA	3.4101e-11	0.409812	0.618	0.475	4.2766e-07	LILRB2-CD48-ITGAL-Mono2	PILRA
KLF2	4.42874e-11	0.412044	0.521	0.363	5.55408e-07	LILRB2-CD48-ITGAL-Mono2	KLF2
APOBEC3A	4.49983e-11	0.611241	0.409	0.261	5.64324e-07	LILRB2-CD48-ITGAL-Mono2	APOBEC3A
COTL1	6.20293e-11	0.388087	0.823	0.811	7.77909e-07	LILRB2-CD48-ITGAL-Mono2	COTL1
PECAM1	1.28411e-10	0.374143	0.534	0.389	1.6104e-06	LILRB2-CD48-ITGAL-Mono2	PECAM1
LYN	6.06008e-10	0.366771	0.643	0.544	7.59995e-06	LILRB2-CD48-ITGAL-Mono2	LYN
NOP53	1.32343e-09	0.357682	0.733	0.635	1.65972e-05	LILRB2-CD48-ITGAL-Mono2	NOP53
MAPKAPK3	1.5107e-09	0.398938	0.451	0.324	1.89457e-05	LILRB2-CD48-ITGAL-Mono2	MAPKAPK3
PTPRC	1.62841e-09	0.398432	0.743	0.652	2.04219e-05	LILRB2-CD48-ITGAL-Mono2	PTPRC
MS4A7	1.7511e-09	0.389556	0.723	0.645	2.19605e-05	LILRB2-CD48-ITGAL-Mono2	MS4A7
CASP1	2.15391e-09	0.339305	0.591	0.454	2.70122e-05	LILRB2-CD48-ITGAL-Mono2	CASP1
DNAJB1	2.26619e-09	0.386919	0.711	0.583	2.84203e-05	LILRB2-CD48-ITGAL-Mono2	DNAJB1
CSK	2.56736e-09	0.442245	0.429	0.294	3.21973e-05	LILRB2-CD48-ITGAL-Mono2	CSK
SOD1	3.87219e-09	0.323852	0.551	0.435	4.85611e-05	LILRB2-CD48-ITGAL-Mono2	SOD1
CD52	1.47461e-08	0.474856	0.686	0.582	0.00018493	LILRB2-CD48-ITGAL-Mono2	CD52
FCGR3A	3.44742e-08	0.5274	0.638	0.56	0.000432341	LILRB2-CD48-ITGAL-Mono2	FCGR3A
RGS19	1.33766e-07	0.384127	0.576	0.452	0.00167756	LILRB2-CD48-ITGAL-Mono2	RGS19
LILRB1	1.46665e-07	0.341888	0.456	0.339	0.00183932	LILRB2-CD48-ITGAL-Mono2	LILRB1
ADD3	3.35739e-07	0.405461	0.322	0.207	0.0042105	LILRB2-CD48-ITGAL-Mono2	ADD3
CDC42EP3	4.34437e-07	0.351344	0.304	0.193	0.00544827	LILRB2-CD48-ITGAL-Mono2	CDC42EP3
GBP2	7.8644e-07	0.330949	0.529	0.414	0.00986275	LILRB2-CD48-ITGAL-Mono2	GBP2
IER5	2.31577e-06	0.369952	0.546	0.446	0.0290421	LILRB2-CD48-ITGAL-Mono2	IER5
PELI1	2.89553e-06	0.349866	0.476	0.364	0.0363129	LILRB2-CD48-ITGAL-Mono2	PELI1
CXCR4	3.14095e-06	0.337432	0.696	0.602	0.0393907	LILRB2-CD48-ITGAL-Mono2	CXCR4
ISG15	5.61979e-06	0.529401	0.504	0.398	0.0704778	LILRB2-CD48-ITGAL-Mono2	ISG15
HSP90AA1	1.31534e-05	0.355447	0.873	0.863	0.164957	LILRB2-CD48-ITGAL-Mono2	HSP90AA1
FPR2	2.57703e-05	0.323108	0.394	0.294	0.323186	LILRB2-CD48-ITGAL-Mono2	FPR2
SMIM25	4.11687e-05	0.368864	0.586	0.534	0.516297	LILRB2-CD48-ITGAL-Mono2	SMIM25
PDK4	5.18499e-05	0.382731	0.294	0.216	0.650249	LILRB2-CD48-ITGAL-Mono2	PDK4
CORO1B	0.000134201	0.443646	0.469	0.388	1	LILRB2-CD48-ITGAL-Mono2	CORO1B
ZFAND5	0.000206364	0.373411	0.706	0.669	1	LILRB2-CD48-ITGAL-Mono2	ZFAND5
TBL1XR1	0.000465156	0.323563	0.282	0.206	1	LILRB2-CD48-ITGAL-Mono2	TBL1XR1
ARRDC3	0.000706603	0.410124	0.332	0.259	1	LILRB2-CD48-ITGAL-Mono2	ARRDC3
CCL4	0.000751263	0.342505	0.566	0.493	1	LILRB2-CD48-ITGAL-Mono2	CCL4
RAD21	0.00086137	0.328251	0.409	0.333	1	LILRB2-CD48-ITGAL-Mono2	RAD21
CH25H	0.000972519	0.348942	0.252	0.185	1	LILRB2-CD48-ITGAL-Mono2	CH25H
KDM6B	2.28254e-19	0.554722	0.78	0.551	2.86254e-15	CCL3-4-IL1B-MRC1-Mphage-like1	KDM6B
TNFAIP3	6.80445e-18	0.568469	0.848	0.672	8.53346e-14	CCL3-4-IL1B-MRC1-Mphage-like1	TNFAIP3
THBS11	7.81435e-17	0.631928	0.773	0.586	9.79998e-13	CCL3-4-IL1B-MRC1-Mphage-like1	THBS1
ICAM1	1.34554e-16	0.596191	0.639	0.427	1.68744e-12	CCL3-4-IL1B-MRC1-Mphage-like1	ICAM1
IL1B	1.45205e-16	0.628261	0.801	0.613	1.82101e-12	CCL3-4-IL1B-MRC1-Mphage-like1	IL1B
PDE4B	4.42968e-14	0.422761	0.693	0.506	5.55527e-10	CCL3-4-IL1B-MRC1-Mphage-like1	PDE4B
GADD45B	2.71899e-13	0.43424	0.852	0.687	3.40989e-09	CCL3-4-IL1B-MRC1-Mphage-like1	GADD45B
SOCS3	4.13768e-13	0.504724	0.769	0.584	5.18907e-09	CCL3-4-IL1B-MRC1-Mphage-like1	SOCS3
PLAUR	3.22016e-12	0.469998	0.924	0.811	4.0384e-08	CCL3-4-IL1B-MRC1-Mphage-like1	PLAUR
NLRP3	4.79359e-12	0.48421	0.715	0.536	6.01164e-08	CCL3-4-IL1B-MRC1-Mphage-like1	NLRP3
IER3	2.75694e-11	0.345767	0.866	0.74	3.45748e-07	CCL3-4-IL1B-MRC1-Mphage-like1	IER3
SOD2	3.13425e-11	0.356943	0.877	0.757	3.93066e-07	CCL3-4-IL1B-MRC1-Mphage-like1	SOD2
DUSP2	5.09907e-11	0.454707	0.599	0.414	6.39475e-07	CCL3-4-IL1B-MRC1-Mphage-like1	DUSP2
PELI11	1.30071e-10	0.364022	0.545	0.362	1.63122e-06	CCL3-4-IL1B-MRC1-Mphage-like1	PELI1
LCP2	1.73966e-10	0.327105	0.736	0.59	2.18171e-06	CCL3-4-IL1B-MRC1-Mphage-like1	LCP2
NFKB1	1.88785e-10	0.339659	0.545	0.368	2.36755e-06	CCL3-4-IL1B-MRC1-Mphage-like1	NFKB1
ETS2	2.05691e-10	0.388805	0.769	0.604	2.57958e-06	CCL3-4-IL1B-MRC1-Mphage-like1	ETS2
AREG	8.56963e-10	0.406478	0.78	0.609	1.07472e-05	CCL3-4-IL1B-MRC1-Mphage-like1	AREG
TNFAIP2	9.12688e-10	0.542856	0.596	0.436	1.1446e-05	CCL3-4-IL1B-MRC1-Mphage-like1	TNFAIP2
CSF3R	2.90264e-09	0.349386	0.733	0.558	3.6402e-05	CCL3-4-IL1B-MRC1-Mphage-like1	CSF3R
PLEK	4.14237e-09	0.409094	0.733	0.604	5.19494e-05	CCL3-4-IL1B-MRC1-Mphage-like1	PLEK
MAFF	4.93076e-09	0.355556	0.437	0.291	6.18367e-05	CCL3-4-IL1B-MRC1-Mphage-like1	MAFF
ARL5B	5.39705e-09	0.367252	0.39	0.234	6.76843e-05	CCL3-4-IL1B-MRC1-Mphage-like1	ARL5B
FOSB	1.08399e-08	0.410081	0.819	0.701	0.000135944	CCL3-4-IL1B-MRC1-Mphage-like1	FOSB
CD83	1.15271e-08	0.341671	0.736	0.575	0.000144561	CCL3-4-IL1B-MRC1-Mphage-like1	CD83
CXCL2	1.36451e-08	0.50339	0.578	0.397	0.000171123	CCL3-4-IL1B-MRC1-Mphage-like1	CXCL2
GPR183	1.49449e-08	0.344436	0.693	0.518	0.000187424	CCL3-4-IL1B-MRC1-Mphage-like1	GPR183
RNF19B	2.09198e-08	0.329222	0.35	0.211	0.000262355	CCL3-4-IL1B-MRC1-Mphage-like1	RNF19B
CCL4L2	2.72016e-08	0.924465	0.484	0.327	0.000341135	CCL3-4-IL1B-MRC1-Mphage-like1	CCL4L2
LUCAT1	3.4185e-08	0.405512	0.336	0.197	0.000428714	CCL3-4-IL1B-MRC1-Mphage-like1	LUCAT1
PRDM1	6.95061e-08	0.392138	0.343	0.203	0.000871676	CCL3-4-IL1B-MRC1-Mphage-like1	PRDM1
ITGAX1	8.07306e-08	0.343357	0.671	0.511	0.00101244	CCL3-4-IL1B-MRC1-Mphage-like1	ITGAX
GPR84	2.12568e-07	0.360005	0.282	0.16	0.00266581	CCL3-4-IL1B-MRC1-Mphage-like1	GPR84
EGR1	7.32219e-07	0.338081	0.628	0.458	0.00918276	CCL3-4-IL1B-MRC1-Mphage-like1	EGR1
CCL41	9.95064e-07	0.752455	0.639	0.488	0.0124791	CCL3-4-IL1B-MRC1-Mphage-like1	CCL4
NFKBIZ	1.41246e-06	0.339986	0.61	0.465	0.0177137	CCL3-4-IL1B-MRC1-Mphage-like1	NFKBIZ
IL1R21	1.9034e-06	0.397247	0.473	0.333	0.0238706	CCL3-4-IL1B-MRC1-Mphage-like1	IL1R2
EREG	2.21517e-06	0.391568	0.552	0.417	0.0277805	CCL3-4-IL1B-MRC1-Mphage-like1	EREG
CCL3L1	4.42868e-06	0.683716	0.43	0.309	0.0555401	CCL3-4-IL1B-MRC1-Mphage-like1	CCL3L1
CCL3	5.52435e-06	0.562599	0.679	0.553	0.0692809	CCL3-4-IL1B-MRC1-Mphage-like1	CCL3
MMP19	7.35681e-06	0.4011	0.375	0.256	0.0922617	CCL3-4-IL1B-MRC1-Mphage-like1	MMP19
EIF4E	8.48912e-06	0.328031	0.495	0.373	0.106462	CCL3-4-IL1B-MRC1-Mphage-like1	EIF4E
MRC1	1.05335e-05	0.390915	0.357	0.245	0.132101	CCL3-4-IL1B-MRC1-Mphage-like1	MRC1
GLS	1.56208e-05	0.408364	0.379	0.262	0.1959	CCL3-4-IL1B-MRC1-Mphage-like1	GLS
RB1	3.4302e-05	0.344862	0.469	0.35	0.430182	CCL3-4-IL1B-MRC1-Mphage-like1	RB1
CCL20	5.6216e-05	0.599767	0.386	0.278	0.705005	CCL3-4-IL1B-MRC1-Mphage-like1	CCL20
IL10	8.49404e-05	0.388482	0.361	0.258	1	CCL3-4-IL1B-MRC1-Mphage-like1	IL10
SPHK1	0.000112498	0.354838	0.314	0.218	1	CCL3-4-IL1B-MRC1-Mphage-like1	SPHK1
G0S2	0.000140952	0.33668	0.61	0.497	1	CCL3-4-IL1B-MRC1-Mphage-like1	G0S2
CXCL3	0.000252446	0.55675	0.386	0.286	1	CCL3-4-IL1B-MRC1-Mphage-like1	CXCL3
APOBEC3A1	0.000477105	0.349616	0.368	0.273	1	CCL3-4-IL1B-MRC1-Mphage-like1	APOBEC3A
PHACTR1	0.00111314	0.365596	0.574	0.485	1	CCL3-4-IL1B-MRC1-Mphage-like1	PHACTR1
ANGPTL4	1.03352e-54	1.08462	0.404	0.101	1.29614e-50	GPNMB-ANGPTL4-CXCL8-Mphage-like2	ANGPTL4
GPNMB	1.18772e-50	1.16118	0.556	0.218	1.48952e-46	GPNMB-ANGPTL4-CXCL8-Mphage-like2	GPNMB
SLC16A10	2.93037e-46	0.758528	0.472	0.154	3.67497e-42	GPNMB-ANGPTL4-CXCL8-Mphage-like2	SLC16A10
ABCA1	7.5151e-40	0.722572	0.621	0.316	9.42469e-36	GPNMB-ANGPTL4-CXCL8-Mphage-like2	ABCA1
ERO1A	8.18801e-40	0.801941	0.537	0.24	1.02686e-35	GPNMB-ANGPTL4-CXCL8-Mphage-like2	ERO1A
C15orf48	9.97821e-40	1.02938	0.593	0.284	1.25137e-35	GPNMB-ANGPTL4-CXCL8-Mphage-like2	C15orf48
CDCP1	8.26106e-33	0.411259	0.292	0.085	1.03602e-28	GPNMB-ANGPTL4-CXCL8-Mphage-like2	CDCP1
CXCL31	9.83328e-33	1.11489	0.534	0.26	1.23319e-28	GPNMB-ANGPTL4-CXCL8-Mphage-like2	CXCL3
CSTB	4.52299e-32	1.04527	0.843	0.701	5.67228e-28	GPNMB-ANGPTL4-CXCL8-Mphage-like2	CSTB
PHLDA1	6.05213e-31	0.647635	0.5	0.228	7.58998e-27	GPNMB-ANGPTL4-CXCL8-Mphage-like2	PHLDA1
MMP191	1.27836e-30	0.717254	0.506	0.232	1.60319e-26	GPNMB-ANGPTL4-CXCL8-Mphage-like2	MMP19
GBE1	1.60378e-28	0.544818	0.32	0.111	2.0113e-24	GPNMB-ANGPTL4-CXCL8-Mphage-like2	GBE1
ERRFI1	1.91087e-28	0.530425	0.337	0.118	2.39642e-24	GPNMB-ANGPTL4-CXCL8-Mphage-like2	ERRFI1
CTSL	2.19584e-28	1.05652	0.728	0.548	2.75381e-24	GPNMB-ANGPTL4-CXCL8-Mphage-like2	CTSL
CCL201	2.98818e-28	1.01017	0.514	0.255	3.74748e-24	GPNMB-ANGPTL4-CXCL8-Mphage-like2	CCL20
P4HA1	6.00421e-28	0.602425	0.475	0.228	7.52988e-24	GPNMB-ANGPTL4-CXCL8-Mphage-like2	P4HA1
PDE4DIP	6.2238e-28	0.449685	0.463	0.207	7.80526e-24	GPNMB-ANGPTL4-CXCL8-Mphage-like2	PDE4DIP
PLIN2	1.16232e-26	0.959832	0.831	0.69	1.45766e-22	GPNMB-ANGPTL4-CXCL8-Mphage-like2	PLIN2
CXCL8	2.80515e-26	1.27566	0.728	0.515	3.51794e-22	GPNMB-ANGPTL4-CXCL8-Mphage-like2	CXCL8
DOCK4	2.31133e-23	0.386015	0.416	0.192	2.89864e-19	GPNMB-ANGPTL4-CXCL8-Mphage-like2	DOCK4
BNIP3	2.71219e-23	0.508137	0.326	0.129	3.40136e-19	GPNMB-ANGPTL4-CXCL8-Mphage-like2	BNIP3
CLEC5A	4.594e-23	0.614354	0.522	0.288	5.76134e-19	GPNMB-ANGPTL4-CXCL8-Mphage-like2	CLEC5A
ARHGAP18	7.69271e-23	0.487467	0.601	0.37	9.64742e-19	GPNMB-ANGPTL4-CXCL8-Mphage-like2	ARHGAP18
IL1R1	8.78622e-23	0.43744	0.253	0.084	1.10188e-18	GPNMB-ANGPTL4-CXCL8-Mphage-like2	IL1R1
CD109	1.38086e-22	0.414276	0.253	0.086	1.73174e-18	GPNMB-ANGPTL4-CXCL8-Mphage-like2	CD109
NRP1	1.63316e-22	0.356656	0.261	0.09	2.04815e-18	GPNMB-ANGPTL4-CXCL8-Mphage-like2	NRP1
MIF	1.84849e-22	0.682166	0.77	0.529	2.31819e-18	GPNMB-ANGPTL4-CXCL8-Mphage-like2	MIF
BCAT1	7.01903e-21	0.525877	0.478	0.257	8.80257e-17	GPNMB-ANGPTL4-CXCL8-Mphage-like2	BCAT1
SNAPC1	2.48937e-20	0.498925	0.32	0.137	3.12192e-16	GPNMB-ANGPTL4-CXCL8-Mphage-like2	SNAPC1
ALOX5AP	1.95481e-19	0.341505	0.817	0.577	2.45152e-15	GPNMB-ANGPTL4-CXCL8-Mphage-like2	ALOX5AP
FNDC3B	3.99648e-19	0.388776	0.565	0.346	5.01199e-15	GPNMB-ANGPTL4-CXCL8-Mphage-like2	FNDC3B
RALA	4.14184e-19	0.393225	0.458	0.251	5.19428e-15	GPNMB-ANGPTL4-CXCL8-Mphage-like2	RALA
SDC2	4.87145e-19	0.479984	0.351	0.164	6.10929e-15	GPNMB-ANGPTL4-CXCL8-Mphage-like2	SDC2
SQSTM1	6.92998e-19	0.444194	0.73	0.557	8.69089e-15	GPNMB-ANGPTL4-CXCL8-Mphage-like2	SQSTM1
NDRG1	9.86475e-19	0.536719	0.534	0.313	1.23714e-14	GPNMB-ANGPTL4-CXCL8-Mphage-like2	NDRG1
DUSP4	1.30738e-18	0.481914	0.368	0.171	1.63959e-14	GPNMB-ANGPTL4-CXCL8-Mphage-like2	DUSP4
ELL2	1.43669e-18	0.342248	0.736	0.533	1.80175e-14	GPNMB-ANGPTL4-CXCL8-Mphage-like2	ELL2
ADAM28	2.07668e-18	0.468029	0.39	0.194	2.60436e-14	GPNMB-ANGPTL4-CXCL8-Mphage-like2	ADAM28
ZFYVE16	5.92961e-18	0.424511	0.511	0.307	7.43633e-14	GPNMB-ANGPTL4-CXCL8-Mphage-like2	ZFYVE16
BNIP3L	6.14329e-18	0.551527	0.699	0.529	7.7043e-14	GPNMB-ANGPTL4-CXCL8-Mphage-like2	BNIP3L
FAM162A	3.10036e-17	0.480166	0.506	0.3	3.88816e-13	GPNMB-ANGPTL4-CXCL8-Mphage-like2	FAM162A
MMP14	5.10745e-17	0.401254	0.272	0.114	6.40525e-13	GPNMB-ANGPTL4-CXCL8-Mphage-like2	MMP14
AFF4	1.92498e-16	0.455826	0.587	0.387	2.41412e-12	GPNMB-ANGPTL4-CXCL8-Mphage-like2	AFF4
PIK3CB	2.03194e-16	0.327169	0.323	0.155	2.54826e-12	GPNMB-ANGPTL4-CXCL8-Mphage-like2	PIK3CB
CD9	2.78312e-16	0.420743	0.41	0.212	3.49031e-12	GPNMB-ANGPTL4-CXCL8-Mphage-like2	CD9
VEGFA	2.81334e-16	0.37773	0.683	0.448	3.52821e-12	GPNMB-ANGPTL4-CXCL8-Mphage-like2	VEGFA
CD82	4.07875e-16	0.382375	0.472	0.267	5.11515e-12	GPNMB-ANGPTL4-CXCL8-Mphage-like2	CD82
CYP27A1	4.20401e-16	0.365718	0.298	0.132	5.27225e-12	GPNMB-ANGPTL4-CXCL8-Mphage-like2	CYP27A1
HK2	8.19358e-16	0.462692	0.371	0.193	1.02756e-11	GPNMB-ANGPTL4-CXCL8-Mphage-like2	HK2
FTL	2.00758e-15	0.327136	0.997	0.997	2.5177e-11	GPNMB-ANGPTL4-CXCL8-Mphage-like2	FTL
ABL2	2.00979e-15	0.579595	0.452	0.268	2.52048e-11	GPNMB-ANGPTL4-CXCL8-Mphage-like2	ABL2
CXCL21	3.71224e-15	0.617604	0.587	0.389	4.65552e-11	GPNMB-ANGPTL4-CXCL8-Mphage-like2	CXCL2
RHOH	7.18482e-15	0.427363	0.368	0.188	9.01048e-11	GPNMB-ANGPTL4-CXCL8-Mphage-like2	RHOH
SDC4	1.02643e-14	0.334938	0.382	0.2	1.28724e-10	GPNMB-ANGPTL4-CXCL8-Mphage-like2	SDC4
SMS	1.93876e-14	0.344062	0.553	0.368	2.4314e-10	GPNMB-ANGPTL4-CXCL8-Mphage-like2	SMS
ANXA5	2.07727e-14	0.330075	0.84	0.719	2.60511e-10	GPNMB-ANGPTL4-CXCL8-Mphage-like2	ANXA5
CD831	2.11749e-14	0.346696	0.764	0.565	2.65555e-10	GPNMB-ANGPTL4-CXCL8-Mphage-like2	CD83
BTG1	2.78713e-14	0.34659	0.927	0.84	3.49535e-10	GPNMB-ANGPTL4-CXCL8-Mphage-like2	BTG1
IL1RN	3.50449e-14	0.753675	0.455	0.279	4.39498e-10	GPNMB-ANGPTL4-CXCL8-Mphage-like2	IL1RN
LMAN1	1.78188e-13	0.420933	0.385	0.233	2.23465e-09	GPNMB-ANGPTL4-CXCL8-Mphage-like2	LMAN1
RNASE1	2.30156e-13	0.7559	0.351	0.19	2.88639e-09	GPNMB-ANGPTL4-CXCL8-Mphage-like2	RNASE1
SPP1	4.13617e-13	0.772938	0.772	0.683	5.18717e-09	GPNMB-ANGPTL4-CXCL8-Mphage-like2	SPP1
BASP1	4.61941e-13	0.342164	0.674	0.512	5.7932e-09	GPNMB-ANGPTL4-CXCL8-Mphage-like2	BASP1
PMP22	5.36702e-13	0.363379	0.323	0.169	6.73077e-09	GPNMB-ANGPTL4-CXCL8-Mphage-like2	PMP22
ETS21	7.10356e-13	0.365937	0.742	0.603	8.90857e-09	GPNMB-ANGPTL4-CXCL8-Mphage-like2	ETS2
G0S21	1.09588e-12	0.608904	0.643	0.488	1.37435e-08	GPNMB-ANGPTL4-CXCL8-Mphage-like2	G0S2
BZW1	1.75162e-12	0.419252	0.64	0.513	2.19671e-08	GPNMB-ANGPTL4-CXCL8-Mphage-like2	BZW1
OSBPL8	1.76175e-12	0.492735	0.548	0.38	2.20942e-08	GPNMB-ANGPTL4-CXCL8-Mphage-like2	OSBPL8
MAPK6	1.77943e-12	0.345507	0.354	0.195	2.23159e-08	GPNMB-ANGPTL4-CXCL8-Mphage-like2	MAPK6
OLR1	2.10548e-12	0.347646	0.728	0.548	2.64048e-08	GPNMB-ANGPTL4-CXCL8-Mphage-like2	OLR1
MRC11	2.53195e-12	0.428027	0.41	0.233	3.17531e-08	GPNMB-ANGPTL4-CXCL8-Mphage-like2	MRC1
FNIP2	3.86107e-12	0.416457	0.441	0.286	4.84216e-08	GPNMB-ANGPTL4-CXCL8-Mphage-like2	FNIP2
FABP5	4.02765e-12	0.531061	0.489	0.328	5.05108e-08	GPNMB-ANGPTL4-CXCL8-Mphage-like2	FABP5
HSP90B1	4.53449e-12	0.478511	0.753	0.627	5.6867e-08	GPNMB-ANGPTL4-CXCL8-Mphage-like2	HSP90B1
FBP1	5.58824e-12	0.455186	0.612	0.451	7.00822e-08	GPNMB-ANGPTL4-CXCL8-Mphage-like2	FBP1
PTPN12	6.50845e-12	0.347552	0.537	0.363	8.16225e-08	GPNMB-ANGPTL4-CXCL8-Mphage-like2	PTPN12
P4HB	8.26784e-12	0.367958	0.744	0.595	1.03687e-07	GPNMB-ANGPTL4-CXCL8-Mphage-like2	P4HB
TGM2	1.15396e-11	0.482973	0.312	0.167	1.44718e-07	GPNMB-ANGPTL4-CXCL8-Mphage-like2	TGM2
LGMN	1.24201e-11	0.46772	0.385	0.224	1.5576e-07	GPNMB-ANGPTL4-CXCL8-Mphage-like2	LGMN
FCGR2B	1.31179e-11	0.408629	0.365	0.21	1.64512e-07	GPNMB-ANGPTL4-CXCL8-Mphage-like2	FCGR2B
CTSD	2.03692e-11	0.532022	0.815	0.754	2.5545e-07	GPNMB-ANGPTL4-CXCL8-Mphage-like2	CTSD
GPI	2.08819e-11	0.413069	0.531	0.372	2.61879e-07	GPNMB-ANGPTL4-CXCL8-Mphage-like2	GPI
ITGB1	4.94112e-11	0.370364	0.624	0.485	6.19666e-07	GPNMB-ANGPTL4-CXCL8-Mphage-like2	ITGB1
CCDC71L	6.71982e-11	0.360982	0.264	0.136	8.42733e-07	GPNMB-ANGPTL4-CXCL8-Mphage-like2	CCDC71L
CANX	1.59255e-10	0.366656	0.654	0.541	1.99721e-06	GPNMB-ANGPTL4-CXCL8-Mphage-like2	CANX
IL1RAP	2.54975e-10	0.442614	0.407	0.259	3.19765e-06	GPNMB-ANGPTL4-CXCL8-Mphage-like2	IL1RAP
FNDC3A	4.38416e-10	0.353817	0.404	0.261	5.49818e-06	GPNMB-ANGPTL4-CXCL8-Mphage-like2	FNDC3A
RALGDS	7.74411e-10	0.420451	0.351	0.208	9.71189e-06	GPNMB-ANGPTL4-CXCL8-Mphage-like2	RALGDS
CHST15	9.79144e-10	0.364206	0.365	0.232	1.22794e-05	GPNMB-ANGPTL4-CXCL8-Mphage-like2	CHST15
RGCC	1.18282e-09	0.390745	0.565	0.411	1.48337e-05	GPNMB-ANGPTL4-CXCL8-Mphage-like2	RGCC
IER31	1.22747e-09	0.33199	0.854	0.738	1.53937e-05	GPNMB-ANGPTL4-CXCL8-Mphage-like2	IER3
MALAT1	1.2787e-09	0.329855	0.997	0.994	1.60362e-05	GPNMB-ANGPTL4-CXCL8-Mphage-like2	MALAT1
PLTP	1.77968e-09	0.429554	0.368	0.23	2.2319e-05	GPNMB-ANGPTL4-CXCL8-Mphage-like2	PLTP
TNFAIP31	8.0478e-09	0.327583	0.789	0.675	0.000100927	GPNMB-ANGPTL4-CXCL8-Mphage-like2	TNFAIP3
SDS	8.96451e-09	0.557656	0.312	0.19	0.000112424	GPNMB-ANGPTL4-CXCL8-Mphage-like2	SDS
ENO1	1.06119e-08	0.344749	0.868	0.773	0.000133084	GPNMB-ANGPTL4-CXCL8-Mphage-like2	ENO1
HMOX1	1.21146e-08	0.522647	0.674	0.554	0.000151929	GPNMB-ANGPTL4-CXCL8-Mphage-like2	HMOX1
APOC1	6.18268e-08	0.52708	0.626	0.485	0.00077537	GPNMB-ANGPTL4-CXCL8-Mphage-like2	APOC1
MSR1	2.88617e-07	0.332022	0.449	0.335	0.00361955	GPNMB-ANGPTL4-CXCL8-Mphage-like2	MSR1
ADM	6.96328e-07	0.351765	0.469	0.347	0.00873265	GPNMB-ANGPTL4-CXCL8-Mphage-like2	ADM
LGALS3	8.32814e-07	0.552361	0.705	0.616	0.0104443	GPNMB-ANGPTL4-CXCL8-Mphage-like2	LGALS3
PTGS2	2.07231e-06	0.332599	0.32	0.216	0.0259889	GPNMB-ANGPTL4-CXCL8-Mphage-like2	PTGS2
C1QC	2.2073e-06	0.332307	0.542	0.425	0.0276817	GPNMB-ANGPTL4-CXCL8-Mphage-like2	C1QC
ATF5	2.87131e-06	0.327319	0.368	0.267	0.0360091	GPNMB-ANGPTL4-CXCL8-Mphage-like2	ATF5
IL1B1	1.04289e-05	0.425698	0.697	0.623	0.130788	GPNMB-ANGPTL4-CXCL8-Mphage-like2	IL1B
APOE	3.5656e-05	0.627728	0.728	0.651	0.447161	GPNMB-ANGPTL4-CXCL8-Mphage-like2	APOE
FBP11	1.47352e-21	0.432511	0.696	0.437	1.84795e-17	FN1-TREM2-IL10-Mphage-like3	FBP1
ALOX5AP1	1.86064e-20	0.620098	0.791	0.58	2.33343e-16	FN1-TREM2-IL10-Mphage-like3	ALOX5AP
TGFBI	1.98298e-20	0.519118	0.778	0.564	2.48686e-16	FN1-TREM2-IL10-Mphage-like3	TGFBI
FN1	2.8865e-17	0.780494	0.469	0.271	3.61996e-13	FN1-TREM2-IL10-Mphage-like3	FN1
CLEC5A1	8.4225e-17	0.405461	0.507	0.289	1.05627e-12	FN1-TREM2-IL10-Mphage-like3	CLEC5A
SLC16A3	1.95673e-16	0.37025	0.778	0.575	2.45393e-12	FN1-TREM2-IL10-Mphage-like3	SLC16A3
PKM	3.73427e-16	0.368434	0.881	0.722	4.68314e-12	FN1-TREM2-IL10-Mphage-like3	PKM
MARCO	5.42372e-14	0.521287	0.488	0.299	6.80189e-10	FN1-TREM2-IL10-Mphage-like3	MARCO
SDS1	2.57646e-13	0.529477	0.344	0.184	3.23114e-09	FN1-TREM2-IL10-Mphage-like3	SDS
MIF1	2.96165e-12	0.344802	0.724	0.535	3.7142e-08	FN1-TREM2-IL10-Mphage-like3	MIF
DHRS3	5.59376e-12	0.342796	0.355	0.201	7.01513e-08	FN1-TREM2-IL10-Mphage-like3	DHRS3
RETN	2.14805e-11	0.636007	0.518	0.352	2.69387e-07	FN1-TREM2-IL10-Mphage-like3	RETN
NME1	3.9965e-11	0.334961	0.366	0.216	5.01201e-07	FN1-TREM2-IL10-Mphage-like3	NME1
IL101	7.39483e-05	0.388986	0.35	0.256	0.927386	FN1-TREM2-IL10-Mphage-like3	IL10
FN11	9.14371e-27	0.782199	0.482	0.257	1.14671e-22	FN1-TREM2-RETN-VSIG4-Mphage-like4	FN1
CD81	3.00919e-16	0.678407	0.654	0.497	3.77383e-12	FN1-TREM2-RETN-VSIG4-Mphage-like4	CD81
CALR	2.24361e-14	0.443119	0.705	0.617	2.81371e-10	FN1-TREM2-RETN-VSIG4-Mphage-like4	CALR
VSIG4	3.85064e-14	0.506571	0.62	0.461	4.82909e-10	FN1-TREM2-RETN-VSIG4-Mphage-like4	VSIG4
TUBA1B	4.57397e-13	0.431713	0.717	0.648	5.73622e-09	FN1-TREM2-RETN-VSIG4-Mphage-like4	TUBA1B
MARCO1	1.52487e-12	0.457792	0.455	0.295	1.91233e-08	FN1-TREM2-RETN-VSIG4-Mphage-like4	MARCO
ENG	2.41429e-12	0.418618	0.423	0.267	3.02776e-08	FN1-TREM2-RETN-VSIG4-Mphage-like4	ENG
FCGR3A1	9.87174e-12	0.352748	0.683	0.547	1.23802e-07	FN1-TREM2-RETN-VSIG4-Mphage-like4	FCGR3A
SERPING1	1.69978e-11	0.409916	0.343	0.213	2.1317e-07	FN1-TREM2-RETN-VSIG4-Mphage-like4	SERPING1
YWHAH	6.53592e-11	0.361682	0.575	0.446	8.1967e-07	FN1-TREM2-RETN-VSIG4-Mphage-like4	YWHAH
CAPG	3.05005e-10	0.371348	0.705	0.649	3.82507e-06	FN1-TREM2-RETN-VSIG4-Mphage-like4	CAPG
C1QA	3.06887e-10	0.537327	0.638	0.548	3.84867e-06	FN1-TREM2-RETN-VSIG4-Mphage-like4	C1QA
HLA-DPA1	4.01382e-10	0.356268	0.803	0.791	5.03374e-06	FN1-TREM2-RETN-VSIG4-Mphage-like4	HLA-DPA1
HLA-DQA1	4.30306e-10	0.435691	0.62	0.519	5.39646e-06	FN1-TREM2-RETN-VSIG4-Mphage-like4	HLA-DQA1
FBP12	5.85119e-10	0.436493	0.571	0.45	7.33798e-06	FN1-TREM2-RETN-VSIG4-Mphage-like4	FBP1
CD74	6.30118e-10	0.41543	0.921	0.937	7.90231e-06	FN1-TREM2-RETN-VSIG4-Mphage-like4	CD74
MS4A4A	1.04164e-09	0.344922	0.539	0.398	1.30632e-05	FN1-TREM2-RETN-VSIG4-Mphage-like4	MS4A4A
FPR3	1.66831e-09	0.36025	0.285	0.164	2.09223e-05	FN1-TREM2-RETN-VSIG4-Mphage-like4	FPR3
RGS1	3.67272e-09	0.369465	0.667	0.531	4.60596e-05	FN1-TREM2-RETN-VSIG4-Mphage-like4	RGS1
SIGLEC10	3.83153e-09	0.346894	0.463	0.331	4.80512e-05	FN1-TREM2-RETN-VSIG4-Mphage-like4	SIGLEC10
CTSC	6.48006e-09	0.355197	0.669	0.579	8.12664e-05	FN1-TREM2-RETN-VSIG4-Mphage-like4	CTSC
GLUL	7.70599e-09	0.338958	0.795	0.791	9.66408e-05	FN1-TREM2-RETN-VSIG4-Mphage-like4	GLUL
C1QBP	1.15539e-08	0.344617	0.486	0.347	0.000144897	FN1-TREM2-RETN-VSIG4-Mphage-like4	C1QBP
PDIA3	1.88169e-08	0.338921	0.679	0.595	0.000235982	FN1-TREM2-RETN-VSIG4-Mphage-like4	PDIA3
PRDX1	2.59101e-08	0.335803	0.687	0.616	0.000324939	FN1-TREM2-RETN-VSIG4-Mphage-like4	PRDX1
HLA-DRB5	4.48978e-08	0.485482	0.612	0.54	0.000563063	FN1-TREM2-RETN-VSIG4-Mphage-like4	HLA-DRB5
SPP11	6.06657e-08	0.665299	0.72	0.69	0.000760808	FN1-TREM2-RETN-VSIG4-Mphage-like4	SPP1
HSP90AB1	6.93871e-08	0.362386	0.801	0.767	0.000870183	FN1-TREM2-RETN-VSIG4-Mphage-like4	HSP90AB1
TREM2	7.3293e-08	0.454971	0.394	0.27	0.000919168	FN1-TREM2-RETN-VSIG4-Mphage-like4	TREM2
SLCO2B1	1.01174e-07	0.42992	0.341	0.227	0.00126883	FN1-TREM2-RETN-VSIG4-Mphage-like4	SLCO2B1
C1QC1	3.00924e-07	0.328755	0.537	0.419	0.00377389	FN1-TREM2-RETN-VSIG4-Mphage-like4	C1QC
APBB1IP	3.74655e-07	0.418845	0.591	0.478	0.00469855	FN1-TREM2-RETN-VSIG4-Mphage-like4	APBB1IP
C3	9.24141e-07	0.444471	0.463	0.35	0.0115896	FN1-TREM2-RETN-VSIG4-Mphage-like4	C3
EIF5B	3.5022e-06	0.336101	0.47	0.351	0.0439211	FN1-TREM2-RETN-VSIG4-Mphage-like4	EIF5B
TGFBI1	7.07416e-06	0.358461	0.661	0.578	0.088717	FN1-TREM2-RETN-VSIG4-Mphage-like4	TGFBI
HSP90AA11	7.41493e-06	0.364952	0.866	0.864	0.0929906	FN1-TREM2-RETN-VSIG4-Mphage-like4	HSP90AA1
LGALS9	7.45934e-06	0.466682	0.628	0.527	0.0935476	FN1-TREM2-RETN-VSIG4-Mphage-like4	LGALS9
CD163	1.27115e-05	0.362835	0.774	0.706	0.159415	FN1-TREM2-RETN-VSIG4-Mphage-like4	CD163
STAB1	1.84306e-05	0.349146	0.431	0.327	0.231139	FN1-TREM2-RETN-VSIG4-Mphage-like4	STAB1
USP14	2.2144e-05	0.34529	0.26	0.173	0.277707	FN1-TREM2-RETN-VSIG4-Mphage-like4	USP14
FABP51	2.39978e-05	0.38927	0.429	0.331	0.300956	FN1-TREM2-RETN-VSIG4-Mphage-like4	FABP5
PSME2	3.2804e-05	0.358295	0.646	0.614	0.411395	FN1-TREM2-RETN-VSIG4-Mphage-like4	PSME2
C1QB	0.000124511	0.445789	0.589	0.545	1	FN1-TREM2-RETN-VSIG4-Mphage-like4	C1QB
CTSZ	0.000157304	0.374552	0.648	0.624	1	FN1-TREM2-RETN-VSIG4-Mphage-like4	CTSZ
LMNA	0.000323277	0.697431	0.307	0.244	1	FN1-TREM2-RETN-VSIG4-Mphage-like4	LMNA
APOC11	0.00122801	0.337265	0.553	0.493	1	FN1-TREM2-RETN-VSIG4-Mphage-like4	APOC1
RETN1	0.0016392	0.449343	0.417	0.365	1	FN1-TREM2-RETN-VSIG4-Mphage-like4	RETN
IFI6	0.00175629	0.340002	0.484	0.41	1	FN1-TREM2-RETN-VSIG4-Mphage-like4	IFI6
STOM	0.00317083	0.331473	0.364	0.283	1	FN1-TREM2-RETN-VSIG4-Mphage-like4	STOM
ATF3	0.00529334	0.350036	0.526	0.475	1	FN1-TREM2-RETN-VSIG4-Mphage-like4	ATF3
S100A81	1.16842e-11	1.1581	0.808	0.807	1.46532e-07	LowRead	S100A8
AURKAIP1	4.16535e-11	0.390788	0.228	0.585	5.22376e-07	LowRead	AURKAIP1
CSNK1D	5.62565e-11	0.380033	0.161	0.463	7.05513e-07	LowRead	CSNK1D
DCTN3	2.13646e-10	0.392951	0.13	0.401	2.67934e-06	LowRead	DCTN3
GNAI3	3.01997e-10	0.330401	0.176	0.479	3.78734e-06	LowRead	GNAI3
MRPL20	7.67684e-10	0.370849	0.192	0.5	9.62753e-06	LowRead	MRPL20
STMP1	3.13373e-09	0.334601	0.187	0.482	3.93001e-05	LowRead	STMP1
AUP1	1.19463e-08	0.396581	0.171	0.431	0.000149819	LowRead	AUP1
NDUFB9	1.94792e-08	0.390642	0.249	0.566	0.000244288	LowRead	NDUFB9
PET100	3.10265e-08	0.334428	0.233	0.541	0.000389104	LowRead	PET100
RRP7A	8.94839e-08	0.368081	0.124	0.34	0.00112222	LowRead	RRP7A
S100A41	1.1736e-07	0.554511	0.813	0.871	0.00147181	LowRead	S100A4
ETFA	2.65479e-07	0.34357	0.119	0.315	0.00332938	LowRead	ETFA
KIAA0930	3.15478e-07	0.334194	0.104	0.298	0.0039564	LowRead	KIAA0930
ISCU	3.3859e-07	0.387927	0.176	0.418	0.00424625	LowRead	ISCU
MX2	4.97259e-07	0.410063	0.15	0.371	0.00623612	LowRead	MX2
S100A61	5.07167e-07	0.463786	0.86	0.899	0.00636038	LowRead	S100A6
S100A91	7.01895e-07	0.788538	0.803	0.857	0.00880247	LowRead	S100A9
GCA1	1.36675e-06	0.362883	0.259	0.541	0.0171404	LowRead	GCA
MED15	1.93394e-06	0.402349	0.088	0.254	0.0242535	LowRead	MED15
TMEM248	2.1451e-06	0.343693	0.093	0.258	0.0269017	LowRead	TMEM248
TDG	3.1438e-06	0.370135	0.093	0.259	0.0394264	LowRead	TDG
EVI2B1	3.34074e-06	0.328659	0.295	0.604	0.0418963	LowRead	EVI2B
INPP5D	4.06324e-06	0.333368	0.135	0.32	0.0509571	LowRead	INPP5D
WASHC4	4.75885e-06	0.325085	0.13	0.314	0.0596808	LowRead	WASHC4
FEZ2	5.53181e-06	0.329431	0.109	0.281	0.0693744	LowRead	FEZ2
CKLF	7.04076e-06	0.610256	0.233	0.493	0.0882982	LowRead	CKLF
ADD1	7.78364e-06	0.3724	0.098	0.262	0.0976147	LowRead	ADD1
PIP4K2A	8.21992e-06	0.341353	0.109	0.275	0.103086	LowRead	PIP4K2A
PRDX2	9.10765e-06	0.376611	0.098	0.256	0.114219	LowRead	PRDX2
PLCG2	1.15293e-05	0.467224	0.15	0.347	0.144589	LowRead	PLCG2
NDUFB1	1.16666e-05	0.444687	0.295	0.587	0.146311	LowRead	NDUFB1
MBP	1.49174e-05	0.559546	0.161	0.353	0.187079	LowRead	MBP
CSF3R1	2.68519e-05	0.334422	0.311	0.596	0.33675	LowRead	CSF3R
CSTA1	3.40272e-05	0.380905	0.358	0.672	0.426735	LowRead	CSTA
TMF1	3.57823e-05	0.439376	0.13	0.293	0.448745	LowRead	TMF1
PRKCB	3.68644e-05	0.389696	0.155	0.34	0.462316	LowRead	PRKCB
STAB11	3.83551e-05	0.362228	0.171	0.36	0.481011	LowRead	STAB1
PRPF38B	4.80966e-05	0.372364	0.223	0.444	0.603179	LowRead	PRPF38B
PRAM1	5.44377e-05	0.465968	0.14	0.31	0.682703	LowRead	PRAM1
TMEM173	6.49335e-05	0.354932	0.135	0.287	0.814331	LowRead	TMEM173
ANP32A	7.17569e-05	0.694119	0.264	0.52	0.899903	LowRead	ANP32A
MDM4	9.421e-05	0.447032	0.135	0.296	1	LowRead	MDM4
ETV6	0.000103378	0.409866	0.171	0.348	1	LowRead	ETV6
CLEC4E1	0.000157815	0.477521	0.259	0.482	1	LowRead	CLEC4E
VPS37B	0.000159628	0.478996	0.155	0.31	1	LowRead	VPS37B
C4orf48	0.000167924	0.433491	0.301	0.555	1	LowRead	C4orf48
UQCR11	0.000189262	0.399479	0.425	0.769	1	LowRead	UQCR11
ZNF638	0.000204475	0.332818	0.119	0.261	1	LowRead	ZNF638
ARHGAP9	0.000295186	0.339657	0.124	0.262	1	LowRead	ARHGAP9
RALB	0.000303857	0.380894	0.135	0.272	1	LowRead	RALB
GPSM3	0.000307678	0.444646	0.383	0.698	1	LowRead	GPSM3
RPAIN	0.000490044	0.374279	0.124	0.253	1	LowRead	RPAIN
RBP71	0.000498087	0.429456	0.161	0.317	1	LowRead	RBP7
MYO1F	0.000614603	0.391385	0.311	0.579	1	LowRead	MYO1F
MSRB1	0.000644261	0.560327	0.13	0.262	1	LowRead	MSRB1
SELL1	0.000677433	0.520272	0.15	0.299	1	LowRead	SELL
USP4	0.00153159	0.553312	0.14	0.267	1	LowRead	USP4
RGS2	0.00201622	0.342231	0.43	0.712	1	LowRead	RGS2
DGKZ	0.00262852	0.410193	0.135	0.256	1	LowRead	DGKZ
ELOB	0.00354056	0.356923	0.466	0.795	1	LowRead	ELOB
JAML	0.00444788	0.420913	0.254	0.446	1	LowRead	JAML
CDA	0.00766454	0.591458	0.14	0.251	1	LowRead	CDA

## Sheet: Fractions
SampleID	Condition	IDH_status	MGMT	FCN1-SELL-S100A8-9-Mono1	LILRB2-CD48-ITGAL-Mono2	CCL3-4-IL1B-MRC1-Mphage-like1	GPNMB-ANGPTL4-CXCL8-Mphage-like2	FN1-TREM2-IL10-Mphage-like3	FN1-TREM2-RETN-VSIG4-Mphage-like4	LowRead	Total
LB3018T	GBM.rec	WT	Un	8	12	0	0	1	1	1	23
LB3579T	GBM.rec	WT	Un	53	17	46	42	31	47	12	248
LB3612T	GBM.new	WT	Un	13	5	5	11	13	7	2	56
LB3667T	GBM.PD1	WT	Meth	14	10	8	0	7	0	1	40
LB3771T	GBM.new	WT	Meth	5	10	0	0	4	2	0	21
LB3836T	GBM.new	WT	Un	35	18	14	8	37	23	5	140
LB3851T	GBM.new	WT	Un	7	4	1	0	8	4	1	25
LB3853T	GBM.PD1	WT	Meth	24	20	6	3	5	5	4	67
LB3854T	GBM.new	WT	Un	30	7	4	0	3	1	9	54
LB3864T	GBM.PD1	WT	Un	17	12	2	6	5	4	4	50
LB3865T	GBM.new	WT	Un	28	7	4	6	13	12	4	74
LB3869T	GBM.PD1	WT	Un	9	5	3	3	2	3	1	26
LB3871T	GBM.rec	WT	Un	11	11	6	1	5	7	8	49
LB3872T	GBM.PD1	WT	Meth	18	14	4	0	14	13	0	63
LB3914T	GBM.PD1	WT	Un	14	19	4	2	16	9	3	67
LB3915T	GBM.new	WT	Meth	14	8	7	1	2	10	22	64
LB3931T	GBM.new	WT	Meth	8	5	8	7	3	6	7	44
LB3933T	GBM.new	WT	Un	7	0	3	3	6	6	1	26
LB3941T	GBM.new	WT	Un	13	9	0	0	0	1	1	24
LB3944T	GBM.PD1	WT	Un	19	10	4	3	2	2	3	43
LB3958T	GBM.rec	Mut	Meth	31	15	6	3	3	6	15	79
LB3963T	GBM.new	WT	Meth	1	18	17	24	16	49	2	127
LB3964T	GBM.rec	Mut	Un	12	11	1	0	8	6	2	40
LB4003T	GBM.PD1	WT	Un	13	4	4	5	6	7	14	53
LB4006T	GBM.PD1	WT	Un	10	4	1	1	1	2	6	25
LB4015T	GBM.rec	WT	Meth	5	3	2	3	3	0	0	16
LB4024T	GBM.PD1	WT	Un	7	4	1	3	3	2	0	20
LB4025T	GBM.PD1	Mut	Meth	33	26	36	15	45	59	8	222
LB4034T	GBM.new	WT	Un	3	6	9	46	6	19	0	89
LB4038T	GBM.new	WT	Un	1	19	5	9	9	44	6	93
LB4059T	GBM.rec	WT	Un	37	29	13	21	11	16	6	133
LB4075T	GBM.PD1	WT	Meth	7	5	5	24	6	8	3	58
LB4101T	GBM.rec	WT	Un	28	8	1	4	2	3	11	57
LB4102T	GBM.rec	Mut	Un	13	4	3	11	7	7	13	58
LB4112T	GBM.PD1	WT	Un	8	15	20	56	48	78	10	235
LB4117T	GBM.PD1	WT	Un	9	4	2	1	8	0	2	26
LB4130T	GBM.rec	WT	Meth	1	2	3	7	2	5	0	20
LB4143T	GBM.rec	WT	Meth	9	14	16	16	6	15	4	80
LB4177T	GBM.rec	Mut	Un	9	6	3	7	2	1	1	29
LB4180T	GBM.new	WT	Un	5	1	0	4	0	2	1	13

## Sheet: Fraction.p.val
	Type	new.vs.PD1.wilcox	rec.vs.PD1.wilcox
1	FCN1-SELL-S100A8-9-Mono1	0.476227	0.554053
2	LILRB2-CD48-ITGAL-Mono2	0.198195	0.78101
3	CCL3-4-IL1B-MRC1-Mphage-like1	0.74743	0.643315
4	GPNMB-ANGPTL4-CXCL8-Mphage-like2	0.889824	0.395257
5	FN1-TREM2-IL10-Mphage-like3	0.597173	0.0997259
6	FN1-TREM2-RETN-VSIG4-Mphage-like4	0.0934351	1
7	LowRead	0.729927	0.897493

## Sheet: DEG
Gene	p_val	avg_logFC	pct.1	pct.2	p_val_adj	cluster	gene	diff	celltype
CXCL10	1.34836e-21	3.4896	0.49	0.023	1.69097e-17	GBM.PD1	CXCL10	0.467	CCL3-4-IL1B-MRC1-Mphage-like1
GBP1	6.86064e-17	2.30706	0.58	0.153	8.60393e-13	GBM.PD1	GBP1	0.427	CCL3-4-IL1B-MRC1-Mphage-like1
CXCL9	1.5853e-16	2.05296	0.36	0.006	1.98813e-12	GBM.PD1	CXCL9	0.354	CCL3-4-IL1B-MRC1-Mphage-like1
CXCL1	2.22233e-06	1.99163	0.273	0.07	0.0278702	GBM.new	CXCL1	0.203	CCL3-4-IL1B-MRC1-Mphage-like1
SPP1	6.94825e-18	1.97567	0.909	0.62	8.7138e-14	GBM.new	SPP1	0.289	CCL3-4-IL1B-MRC1-Mphage-like1
GBP5	1.32993e-24	1.90531	0.6	0.062	1.66786e-20	GBM.PD1	GBP5	0.538	CCL3-4-IL1B-MRC1-Mphage-like1
GBP4	3.18869e-16	1.50584	0.49	0.085	3.99894e-12	GBM.PD1	GBP4	0.405	CCL3-4-IL1B-MRC1-Mphage-like1
STAT1	7.97216e-20	1.40786	0.71	0.243	9.99788e-16	GBM.PD1	STAT1	0.467	CCL3-4-IL1B-MRC1-Mphage-like1
CCL20	1.32843e-06	1.32408	0.558	0.32	0.0166598	GBM.new	CCL20	0.238	CCL3-4-IL1B-MRC1-Mphage-like1
IDO1	2.58372e-14	1.32165	0.31	0.006	3.24025e-10	GBM.PD1	IDO1	0.304	CCL3-4-IL1B-MRC1-Mphage-like1
VAMP5	1.49593e-15	1.31687	0.73	0.356	1.87604e-11	GBM.PD1	VAMP5	0.374	CCL3-4-IL1B-MRC1-Mphage-like1
IRF1	2.01199e-12	1.31342	0.69	0.356	2.52323e-08	GBM.PD1	IRF1	0.334	CCL3-4-IL1B-MRC1-Mphage-like1
WARS	1.49829e-07	1.29635	0.62	0.379	0.001879	GBM.PD1	WARS	0.241	CCL3-4-IL1B-MRC1-Mphage-like1
CXCL8	1.22793e-10	1.28498	0.844	0.62	1.53994e-06	GBM.new	CXCL8	0.224	CCL3-4-IL1B-MRC1-Mphage-like1
TAP1	5.05837e-24	1.20585	0.72	0.164	6.34371e-20	GBM.PD1	TAP1	0.556	CCL3-4-IL1B-MRC1-Mphage-like1
MRC1	4.93288e-09	1.15068	0.54	0.254	6.18632e-05	GBM.rec	MRC1	0.286	CCL3-4-IL1B-MRC1-Mphage-like1
SERPING1	8.10465e-18	1.13044	0.56	0.102	1.0164e-13	GBM.PD1	SERPING1	0.458	CCL3-4-IL1B-MRC1-Mphage-like1
IFIT2	2.71279e-14	1.11505	0.4	0.045	3.40211e-10	GBM.PD1	IFIT2	0.355	CCL3-4-IL1B-MRC1-Mphage-like1
FCGBP	0.000218823	1.72329	0.253	0.144	1	GBM.new	FCGBP	0.109	FN1-TREM2-RETN-VSIG4-Mphage-like4
G0S2	2.18679e-07	1.11489	0.779	0.545	0.00274245	GBM.new	G0S2	0.234	CCL3-4-IL1B-MRC1-Mphage-like1
RARRES3	8.39047e-18	1.06161	0.68	0.209	1.05225e-13	GBM.PD1	RARRES3	0.471	CCL3-4-IL1B-MRC1-Mphage-like1
CALHM6	4.73922e-12	1.04158	0.66	0.288	5.94346e-08	GBM.PD1	CALHM6	0.372	CCL3-4-IL1B-MRC1-Mphage-like1
SLC16A10	5.57317e-07	1.00162	0.416	0.15	0.00698932	GBM.new	SLC16A10	0.266	CCL3-4-IL1B-MRC1-Mphage-like1
GBP2	1.57018e-11	0.98705	0.7	0.367	1.96916e-07	GBM.PD1	GBP2	0.333	CCL3-4-IL1B-MRC1-Mphage-like1
LAP3	9.31349e-16	0.983389	0.81	0.429	1.168e-11	GBM.PD1	LAP3	0.381	CCL3-4-IL1B-MRC1-Mphage-like1
PARP14	1.82066e-10	0.981474	0.67	0.362	2.28328e-06	GBM.PD1	PARP14	0.308	CCL3-4-IL1B-MRC1-Mphage-like1
PSME2	4.10528e-12	0.932837	0.82	0.559	5.14843e-08	GBM.PD1	PSME2	0.261	CCL3-4-IL1B-MRC1-Mphage-like1
IFIT3	3.76157e-14	0.914027	0.43	0.056	4.71739e-10	GBM.PD1	IFIT3	0.374	CCL3-4-IL1B-MRC1-Mphage-like1
CFD	4.31433e-11	0.912267	0.84	0.644	5.4106e-07	GBM.rec	CFD	0.196	CCL3-4-IL1B-MRC1-Mphage-like1
HLA-DQA1	3.97035e-14	0.911938	0.87	0.514	4.97921e-10	GBM.PD1	HLA-DQA1	0.356	CCL3-4-IL1B-MRC1-Mphage-like1
CXCL3	4.00538e-06	1.60075	0.545	0.325	0.0502315	GBM.new	CXCL3	0.22	CCL3-4-IL1B-MRC1-Mphage-like1
PSMB9	8.50619e-15	0.911894	0.76	0.418	1.06676e-10	GBM.PD1	PSMB9	0.342	CCL3-4-IL1B-MRC1-Mphage-like1
FCGR1A	4.45091e-14	0.896023	0.76	0.333	5.58189e-10	GBM.PD1	FCGR1A	0.427	CCL3-4-IL1B-MRC1-Mphage-like1
PLEKHO1	3.10178e-10	0.883479	0.63	0.316	3.88994e-06	GBM.PD1	PLEKHO1	0.314	CCL3-4-IL1B-MRC1-Mphage-like1
LYZ	5.42593e-11	0.88188	0.95	0.864	6.80466e-07	GBM.rec	LYZ	0.086	CCL3-4-IL1B-MRC1-Mphage-like1
FKBP5	6.76263e-13	0.874297	0.83	0.571	8.48101e-09	GBM.PD1	FKBP5	0.259	CCL3-4-IL1B-MRC1-Mphage-like1
ANGPTL4	3.16875e-06	0.874153	0.273	0.07	0.0397394	GBM.new	ANGPTL4	0.203	CCL3-4-IL1B-MRC1-Mphage-like1
APOL6	1.87129e-11	0.86741	0.49	0.153	2.34678e-07	GBM.PD1	APOL6	0.337	CCL3-4-IL1B-MRC1-Mphage-like1
ISG20	8.83217e-13	0.838636	0.69	0.277	1.10764e-08	GBM.PD1	ISG20	0.413	CCL3-4-IL1B-MRC1-Mphage-like1
SLAMF7	9.8987e-13	0.838264	0.32	0.023	1.2414e-08	GBM.PD1	SLAMF7	0.297	CCL3-4-IL1B-MRC1-Mphage-like1
ANKRD22	3.77606e-14	0.828815	0.5	0.113	4.73556e-10	GBM.PD1	ANKRD22	0.387	CCL3-4-IL1B-MRC1-Mphage-like1
TNFSF10	4.93266e-07	0.791729	0.53	0.266	0.00618605	GBM.PD1	TNFSF10	0.264	CCL3-4-IL1B-MRC1-Mphage-like1
CD74	2.10043e-06	0.769827	1	0.966	0.0263415	GBM.PD1	CD74	0.034	CCL3-4-IL1B-MRC1-Mphage-like1
PLAU	0.000114532	1.45264	0.338	0.145	1	GBM.new	PLAU	0.193	CCL3-4-IL1B-MRC1-Mphage-like1
HLA-DPB1	4.47633e-12	0.740007	0.97	0.853	5.61376e-08	GBM.PD1	HLA-DPB1	0.117	CCL3-4-IL1B-MRC1-Mphage-like1
VMP1	1.02179e-08	0.739739	0.83	0.689	0.000128142	GBM.rec	VMP1	0.141	CCL3-4-IL1B-MRC1-Mphage-like1
FGL2	6.21437e-10	0.735942	0.83	0.588	7.79344e-06	GBM.PD1	FGL2	0.242	CCL3-4-IL1B-MRC1-Mphage-like1
C1QA	8.42806e-06	1.41689	0.679	0.573	0.105696	GBM.rec	C1QA	0.106	FN1-TREM2-IL10-Mphage-like3
UBE2L6	6.4596e-16	0.724491	0.74	0.288	8.10098e-12	GBM.PD1	UBE2L6	0.452	CCL3-4-IL1B-MRC1-Mphage-like1
ARL4A	1.04145e-07	0.724179	0.71	0.452	0.00130608	GBM.rec	ARL4A	0.258	CCL3-4-IL1B-MRC1-Mphage-like1
EPSTI1	7.64463e-12	0.718349	0.64	0.254	9.58713e-08	GBM.PD1	EPSTI1	0.386	CCL3-4-IL1B-MRC1-Mphage-like1
S100A8	0.000422633	1.40641	0.658	0.736	1	GBM.new	S100A8	-0.078	LILRB2-CD48-ITGAL-Mono2
BIRC3	9.45817e-10	0.710131	0.57	0.215	1.18615e-05	GBM.PD1	BIRC3	0.355	CCL3-4-IL1B-MRC1-Mphage-like1
DNTTIP2	2.50215e-07	0.709866	0.71	0.412	0.00313795	GBM.rec	DNTTIP2	0.298	CCL3-4-IL1B-MRC1-Mphage-like1
FYB1	3.50661e-10	0.699654	0.84	0.616	4.39764e-06	GBM.PD1	FYB1	0.224	CCL3-4-IL1B-MRC1-Mphage-like1
C1QB	2.07173e-05	1.37718	0.654	0.573	0.259815	GBM.rec	C1QB	0.081	FN1-TREM2-IL10-Mphage-like3
ANXA1	2.38232e-07	0.695226	0.88	0.734	0.00298767	GBM.rec	ANXA1	0.146	CCL3-4-IL1B-MRC1-Mphage-like1
HLA-DPA1	6.27168e-13	0.67219	0.97	0.785	7.86532e-09	GBM.PD1	HLA-DPA1	0.185	CCL3-4-IL1B-MRC1-Mphage-like1
RNASEK	1.12858e-06	0.667479	0.4	0.153	0.0141535	GBM.PD1	RNASEK	0.247	CCL3-4-IL1B-MRC1-Mphage-like1
PPA1	1.79835e-11	0.659072	0.71	0.333	2.25531e-07	GBM.PD1	PPA1	0.377	CCL3-4-IL1B-MRC1-Mphage-like1
LY6E	8.41155e-09	0.63713	0.69	0.373	0.000105489	GBM.PD1	LY6E	0.317	CCL3-4-IL1B-MRC1-Mphage-like1
FCGR1B	3.59331e-12	0.634268	0.57	0.181	4.50637e-08	GBM.PD1	FCGR1B	0.389	CCL3-4-IL1B-MRC1-Mphage-like1
TRIM22	3.14732e-10	0.632225	0.65	0.311	3.94705e-06	GBM.PD1	TRIM22	0.339	CCL3-4-IL1B-MRC1-Mphage-like1
SLAMF8	2.87223e-12	0.631704	0.44	0.09	3.60207e-08	GBM.PD1	SLAMF8	0.35	CCL3-4-IL1B-MRC1-Mphage-like1
RNF213	1.40218e-07	0.629226	0.72	0.492	0.00175847	GBM.PD1	RNF213	0.228	CCL3-4-IL1B-MRC1-Mphage-like1
CXCR4	2.56988e-08	0.626681	0.78	0.514	0.000322288	GBM.PD1	CXCR4	0.266	CCL3-4-IL1B-MRC1-Mphage-like1
LUCAT1	1.71035e-08	0.622694	0.53	0.226	0.000214495	GBM.rec	LUCAT1	0.304	CCL3-4-IL1B-MRC1-Mphage-like1
IFI6	2.08685e-08	0.619282	0.63	0.288	0.000261711	GBM.PD1	IFI6	0.342	CCL3-4-IL1B-MRC1-Mphage-like1
JAML	4.85018e-09	0.609283	0.71	0.39	6.08261e-05	GBM.rec	JAML	0.32	CCL3-4-IL1B-MRC1-Mphage-like1
JUND	7.60104e-07	0.594301	0.88	0.808	0.00953247	GBM.rec	JUND	0.072	CCL3-4-IL1B-MRC1-Mphage-like1
ALOX5AP	0.0013786	1.2892	0.47	0.391	1	GBM.new	ALOX5AP	0.079	LILRB2-CD48-ITGAL-Mono2
DICER1	3.60605e-07	0.588188	0.55	0.271	0.00452235	GBM.PD1	DICER1	0.279	CCL3-4-IL1B-MRC1-Mphage-like1
LRRK2	5.68885e-11	0.586255	0.62	0.232	7.13438e-07	GBM.PD1	LRRK2	0.388	CCL3-4-IL1B-MRC1-Mphage-like1
CYP27A1	3.34454e-09	0.585398	0.33	0.062	4.19438e-05	GBM.rec	CYP27A1	0.268	CCL3-4-IL1B-MRC1-Mphage-like1
IFITM1	9.79353e-06	1.28036	0.27	0.079	0.122821	GBM.PD1	IFITM1	0.191	CCL3-4-IL1B-MRC1-Mphage-like1
ALOX5AP	1.11992e-14	1.51927	0.712	0.511	1.4045e-10	GBM.new	ALOX5AP	0.201	FCN1-SELL-S100A8-9-Mono1
SPP1	0.0016417	1.26783	0.59	0.439	1	GBM.new	SPP1	0.151	LowRead
SPP1	1.90656e-15	1.418	0.812	0.594	2.39101e-11	GBM.new	SPP1	0.218	FCN1-SELL-S100A8-9-Mono1
IL1RN	0.00268218	1.25805	0.328	0.255	1	GBM.new	IL1RN	0.073	FN1-TREM2-RETN-VSIG4-Mphage-like4
LYZ	2.24584e-05	1.25639	0.817	0.759	0.281651	GBM.rec	LYZ	0.058	GPNMB-ANGPTL4-CXCL8-Mphage-like2
IRF1	2.10587e-12	1.20905	0.525	0.292	2.64097e-08	GBM.PD1	IRF1	0.233	FCN1-SELL-S100A8-9-Mono1
GBP1	1.86964e-11	1.14593	0.327	0.119	2.34472e-07	GBM.PD1	GBP1	0.208	FCN1-SELL-S100A8-9-Mono1
FCGBP	0.000551724	1.24595	0.325	0.16	1	GBM.new	FCGBP	0.165	CCL3-4-IL1B-MRC1-Mphage-like1
IL1B	3.11423e-05	1.24428	0.538	0.477	0.390555	GBM.new	IL1B	0.061	FN1-TREM2-RETN-VSIG4-Mphage-like4
G0S2	2.38359e-09	0.984777	0.688	0.525	2.98926e-05	GBM.new	G0S2	0.163	FCN1-SELL-S100A8-9-Mono1
TIMP1	8.79428e-15	0.957315	0.906	0.897	1.10289e-10	GBM.new	TIMP1	0.009	FCN1-SELL-S100A8-9-Mono1
GBP5	1.0898e-11	0.956387	0.272	0.078	1.36672e-07	GBM.PD1	GBP5	0.194	FCN1-SELL-S100A8-9-Mono1
S100A8	9.76644e-21	0.836981	0.982	0.947	1.22481e-16	GBM.new	S100A8	0.035	FCN1-SELL-S100A8-9-Mono1
S100A9	6.51017e-19	0.819198	0.994	0.971	8.1644e-15	GBM.new	S100A9	0.023	FCN1-SELL-S100A8-9-Mono1
HLA-DQA1	6.06197e-08	0.800055	0.48	0.302	0.000760232	GBM.PD1	HLA-DQA1	0.178	FCN1-SELL-S100A8-9-Mono1
LMNA	0.0051034	1.21209	0.355	0.278	1	GBM.new	LMNA	0.077	FN1-TREM2-RETN-VSIG4-Mphage-like4
CXCL3	1.07111e-09	0.778527	0.435	0.208	1.34328e-05	GBM.new	CXCL3	0.227	FCN1-SELL-S100A8-9-Mono1
CD300E	1.32502e-08	0.753501	0.553	0.36	0.000166171	GBM.rec	CD300E	0.193	FCN1-SELL-S100A8-9-Mono1
CXCL3	1.03927e-05	1.18288	0.333	0.18	0.130335	GBM.new	CXCL3	0.153	FN1-TREM2-RETN-VSIG4-Mphage-like4
CXCR4	3.15857e-16	0.717774	0.762	0.506	3.96116e-12	GBM.PD1	CXCR4	0.256	FCN1-SELL-S100A8-9-Mono1
CXCL2	6.71146e-14	0.706419	0.741	0.437	8.41685e-10	GBM.new	CXCL2	0.304	FCN1-SELL-S100A8-9-Mono1
S100A9	0.00316317	1.17506	0.684	0.873	1	GBM.new	S100A9	-0.189	LILRB2-CD48-ITGAL-Mono2
ADGRE5	3.57123e-05	1.17105	0.373	0.119	0.447868	GBM.PD1	ADGRE5	0.254	LowRead
LGALS1	3.88921e-17	0.674838	0.912	0.907	4.87746e-13	GBM.new	LGALS1	0.005	FCN1-SELL-S100A8-9-Mono1
POLR2L	5.24099e-11	0.649304	0.753	0.611	6.57272e-07	GBM.new	POLR2L	0.142	FCN1-SELL-S100A8-9-Mono1
APOC1	2.25145e-09	0.628799	0.635	0.379	2.82355e-05	GBM.new	APOC1	0.256	FCN1-SELL-S100A8-9-Mono1
THBS1	1.92367e-06	0.624148	0.774	0.739	0.0241247	GBM.rec	THBS1	0.035	FCN1-SELL-S100A8-9-Mono1
BAG3	0.000184963	1.16145	0.402	0.261	1	GBM.new	BAG3	0.141	LILRB2-CD48-ITGAL-Mono2
ALOX5AP	4.87693e-05	1.15904	0.662	0.555	0.611616	GBM.new	ALOX5AP	0.107	CCL3-4-IL1B-MRC1-Mphage-like1
ITGAX	1.10408e-07	0.622195	0.668	0.54	0.00138463	GBM.rec	ITGAX	0.128	FCN1-SELL-S100A8-9-Mono1
IL10	0.000510316	1.15098	0.442	0.305	1	GBM.new	IL10	0.137	FN1-TREM2-IL10-Mphage-like3
SEC61G	9.09707e-12	0.615766	0.747	0.57	1.14086e-07	GBM.new	SEC61G	0.177	FCN1-SELL-S100A8-9-Mono1
SPAG9	1.20074e-07	0.599945	0.558	0.379	0.00150585	GBM.rec	SPAG9	0.179	FCN1-SELL-S100A8-9-Mono1
RARRES3	1.02134e-08	0.597654	0.411	0.212	0.000128086	GBM.PD1	RARRES3	0.199	FCN1-SELL-S100A8-9-Mono1
CD63	2.08427e-17	0.588537	0.9	0.823	2.61389e-13	GBM.new	CD63	0.077	FCN1-SELL-S100A8-9-Mono1
HLA-DRB1	9.22591e-18	0.588464	0.941	0.837	1.15702e-13	GBM.PD1	HLA-DRB1	0.104	FCN1-SELL-S100A8-9-Mono1
CXCL3	6.41573e-16	2.02099	0.608	0.229	8.04596e-12	GBM.new	CXCL3	0.379	FN1-TREM2-IL10-Mphage-like3
SPP1	8.29996e-30	1.97906	0.958	0.594	1.0409e-25	GBM.new	SPP1	0.364	FN1-TREM2-IL10-Mphage-like3
CXCL9	3.04396e-15	1.88835	0.286	0.005	3.81743e-11	GBM.PD1	CXCL9	0.281	FN1-TREM2-IL10-Mphage-like3
CCL20	3.26235e-14	1.80339	0.558	0.213	4.09132e-10	GBM.new	CCL20	0.345	FN1-TREM2-IL10-Mphage-like3
CXCL10	1.23381e-11	1.63996	0.256	0.02	1.54733e-07	GBM.PD1	CXCL10	0.236	FN1-TREM2-IL10-Mphage-like3
GBP1	1.19687e-21	1.62929	0.53	0.09	1.50099e-17	GBM.PD1	GBP1	0.44	FN1-TREM2-IL10-Mphage-like3
IFITM1	1.4042e-17	1.49885	0.351	0.015	1.76101e-13	GBM.PD1	IFITM1	0.336	FN1-TREM2-IL10-Mphage-like3
RETN	3.3414e-08	1.49035	0.691	0.469	0.000419045	GBM.rec	RETN	0.222	FN1-TREM2-IL10-Mphage-like3
CXCL2	1.20223e-08	1.45222	0.608	0.369	0.000150771	GBM.new	CXCL2	0.239	FN1-TREM2-IL10-Mphage-like3
CFD	9.24759e-11	1.38998	0.815	0.611	1.15974e-06	GBM.rec	CFD	0.204	FN1-TREM2-IL10-Mphage-like3
STAT1	3.50563e-25	1.35848	0.667	0.199	4.39641e-21	GBM.PD1	STAT1	0.468	FN1-TREM2-IL10-Mphage-like3
CCL4	2.75046e-08	1.35352	0.6	0.386	0.000344935	GBM.new	CCL4	0.214	FN1-TREM2-IL10-Mphage-like3
HLA-DQA1	1.17348e-25	1.34427	0.845	0.438	1.47166e-21	GBM.PD1	HLA-DQA1	0.407	FN1-TREM2-IL10-Mphage-like3
S100A8	4.07575e-06	1.11002	0.836	0.795	0.051114	GBM.new	S100A8	0.041	LowRead
G0S2	7.43452e-14	1.32832	0.725	0.398	9.32363e-10	GBM.new	G0S2	0.327	FN1-TREM2-IL10-Mphage-like3
GABARAP	0.000110329	1.10158	0.466	0.225	1	GBM.rec	GABARAP	0.241	LowRead
IRF1	8.22441e-22	1.29465	0.69	0.254	1.03142e-17	GBM.PD1	IRF1	0.436	FN1-TREM2-IL10-Mphage-like3
IFITM3	5.7432e-18	1.2841	0.839	0.602	7.20254e-14	GBM.PD1	IFITM3	0.237	FN1-TREM2-IL10-Mphage-like3
VAMP5	1.67264e-27	1.24298	0.821	0.368	2.09766e-23	GBM.PD1	VAMP5	0.453	FN1-TREM2-IL10-Mphage-like3
CXCL2	0.000602855	1.09541	0.339	0.235	1	GBM.new	CXCL2	0.104	FN1-TREM2-RETN-VSIG4-Mphage-like4
ALOX5AP	9.14651e-09	1.23296	0.842	0.767	0.000114706	GBM.new	ALOX5AP	0.075	FN1-TREM2-IL10-Mphage-like3
SERPING1	2.06265e-25	1.22562	0.583	0.1	2.58677e-21	GBM.PD1	SERPING1	0.483	FN1-TREM2-IL10-Mphage-like3
S100A9	2.21947e-05	1.08931	0.852	0.78	0.278344	GBM.new	S100A9	0.072	LowRead
WARS	4.41607e-12	1.17751	0.595	0.308	5.5382e-08	GBM.PD1	WARS	0.287	FN1-TREM2-IL10-Mphage-like3
GRASP	0.00649428	1.08721	0.214	0.391	1	GBM.new	GRASP	-0.177	LILRB2-CD48-ITGAL-Mono2
CALHM6	3.64396e-22	1.16484	0.72	0.289	4.56989e-18	GBM.PD1	CALHM6	0.431	FN1-TREM2-IL10-Mphage-like3
CXCL8	1.3092e-14	1.16238	0.733	0.378	1.64187e-10	GBM.new	CXCL8	0.355	FN1-TREM2-IL10-Mphage-like3
LYZ	2.54463e-07	1.1324	0.926	0.924	0.00319122	GBM.rec	LYZ	0.002	FN1-TREM2-IL10-Mphage-like3
ANGPTL4	4.91843e-08	1.12904	0.358	0.133	0.000616821	GBM.new	ANGPTL4	0.225	FN1-TREM2-IL10-Mphage-like3
NME2	9.71423e-12	1.12898	0.387	0.109	1.21826e-07	GBM.PD1	NME2	0.278	FN1-TREM2-IL10-Mphage-like3
CCL3	8.62699e-09	1.11981	0.692	0.462	0.000108191	GBM.new	CCL3	0.23	FN1-TREM2-IL10-Mphage-like3
SRSF4	3.05776e-05	1.07001	0.288	0.067	0.383474	GBM.PD1	SRSF4	0.221	LowRead
TIMP1	7.16025e-09	1.10195	0.833	0.867	8.97967e-05	GBM.new	TIMP1	-0.034	FN1-TREM2-IL10-Mphage-like3
PSME2	3.10937e-22	1.0967	0.851	0.632	3.89946e-18	GBM.PD1	PSME2	0.219	FN1-TREM2-IL10-Mphage-like3
LY6E	5.05244e-19	1.09506	0.75	0.348	6.33627e-15	GBM.PD1	LY6E	0.402	FN1-TREM2-IL10-Mphage-like3
IL2RA	3.43033e-15	1.0841	0.358	0.045	4.30197e-11	GBM.rec	IL2RA	0.313	FN1-TREM2-IL10-Mphage-like3
PSMB9	1.65344e-27	1.06877	0.815	0.388	2.07358e-23	GBM.PD1	PSMB9	0.427	FN1-TREM2-IL10-Mphage-like3
GBP5	4.8999e-16	1.05425	0.476	0.119	6.14496e-12	GBM.PD1	GBP5	0.357	FN1-TREM2-IL10-Mphage-like3
PLIN2	4.36022e-09	1.03304	0.817	0.787	5.46815e-05	GBM.new	PLIN2	0.03	FN1-TREM2-IL10-Mphage-like3
CD74	2.2703e-16	1.01656	0.988	0.95	2.84719e-12	GBM.PD1	CD74	0.038	FN1-TREM2-IL10-Mphage-like3
GABARAP	2.54375e-08	1.01227	0.685	0.522	0.000319011	GBM.PD1	GABARAP	0.163	FN1-TREM2-IL10-Mphage-like3
ARHGAP18	0.000245421	1.04229	0.254	0.067	1	GBM.PD1	ARHGAP18	0.187	LowRead
RNASEK	5.03766e-16	1.00521	0.536	0.159	6.31772e-12	GBM.PD1	RNASEK	0.377	FN1-TREM2-IL10-Mphage-like3
IFITM2	4.1113e-15	0.989298	0.851	0.597	5.15598e-11	GBM.PD1	IFITM2	0.254	FN1-TREM2-IL10-Mphage-like3
WARS	0.00292752	1.0407	0.254	0.097	1	GBM.PD1	WARS	0.157	LowRead
C1QC	1.36932e-06	0.986005	0.654	0.417	0.0171727	GBM.rec	C1QC	0.237	FN1-TREM2-IL10-Mphage-like3
FGL2	1.10376e-17	0.983708	0.798	0.463	1.38423e-13	GBM.PD1	FGL2	0.335	FN1-TREM2-IL10-Mphage-like3
ISG20	2.85442e-24	0.975908	0.613	0.114	3.57973e-20	GBM.PD1	ISG20	0.499	FN1-TREM2-IL10-Mphage-like3
BAG3	1.4055e-06	0.971476	0.4	0.189	0.0176264	GBM.new	BAG3	0.211	FN1-TREM2-IL10-Mphage-like3
S100A9	1.08957e-05	1.02819	0.843	0.751	0.136643	GBM.rec	S100A9	0.092	GPNMB-ANGPTL4-CXCL8-Mphage-like2
EPSTI1	1.41957e-24	0.950778	0.685	0.194	1.78028e-20	GBM.PD1	EPSTI1	0.491	FN1-TREM2-IL10-Mphage-like3
RNF213	0.00245548	1.02125	0.322	0.149	1	GBM.PD1	RNF213	0.173	LowRead
HLA-DRB5	0.000127854	1.02069	0.631	0.628	1	GBM.PD1	HLA-DRB5	0.003	GPNMB-ANGPTL4-CXCL8-Mphage-like2
GBP4	4.98488e-16	0.950351	0.417	0.075	6.25154e-12	GBM.PD1	GBP4	0.342	FN1-TREM2-IL10-Mphage-like3
CXCR4	3.29531e-23	0.927755	0.905	0.478	4.13265e-19	GBM.PD1	CXCR4	0.427	FN1-TREM2-IL10-Mphage-like3
PLIN2	9.73937e-06	1.01166	0.753	0.73	0.122141	GBM.new	PLIN2	0.023	CCL3-4-IL1B-MRC1-Mphage-like1
S100A12	0.000539903	1.01118	0.376	0.232	1	GBM.new	S100A12	0.144	LILRB2-CD48-ITGAL-Mono2
HLA-DPA1	6.3871e-24	0.918592	0.958	0.796	8.01006e-20	GBM.PD1	HLA-DPA1	0.162	FN1-TREM2-IL10-Mphage-like3
IFITM2	5.9438e-05	1.00395	0.685	0.408	0.745412	GBM.rec	IFITM2	0.277	LowRead
UBE2L6	2.86019e-19	0.91515	0.708	0.323	3.58696e-15	GBM.PD1	UBE2L6	0.385	FN1-TREM2-IL10-Mphage-like3
IL1B	1.58788e-06	0.91274	0.692	0.554	0.0199137	GBM.new	IL1B	0.138	FN1-TREM2-IL10-Mphage-like3
APOE	0.00258289	1.00008	0.791	0.697	1	GBM.rec	APOE	0.094	GPNMB-ANGPTL4-CXCL8-Mphage-like2
MRC1	9.0458e-05	0.996595	0.432	0.278	1	GBM.rec	MRC1	0.154	FN1-TREM2-IL10-Mphage-like3
HLA-DPB1	1.1702e-20	0.90188	0.964	0.781	1.46755e-16	GBM.PD1	HLA-DPB1	0.183	FN1-TREM2-IL10-Mphage-like3
RARRES3	7.87208e-26	0.87296	0.69	0.194	9.87237e-22	GBM.PD1	RARRES3	0.496	FN1-TREM2-IL10-Mphage-like3
SEC61G	5.06464e-08	0.863428	0.775	0.787	0.000635156	GBM.new	SEC61G	-0.012	FN1-TREM2-IL10-Mphage-like3
LAP3	3.94488e-19	0.849491	0.792	0.468	4.94728e-15	GBM.PD1	LAP3	0.324	FN1-TREM2-IL10-Mphage-like3
AZU1	3.97776e-14	0.849186	0.272	0.021	4.98851e-10	GBM.rec	AZU1	0.251	FN1-TREM2-IL10-Mphage-like3
PARP14	4.90505e-11	0.848329	0.536	0.249	6.15143e-07	GBM.PD1	PARP14	0.287	FN1-TREM2-IL10-Mphage-like3
RIPOR2	6.17026e-13	0.834312	0.44	0.119	7.73812e-09	GBM.PD1	RIPOR2	0.321	FN1-TREM2-IL10-Mphage-like3
ZFP36L2	9.48851e-14	0.814645	0.839	0.582	1.18995e-09	GBM.PD1	ZFP36L2	0.257	FN1-TREM2-IL10-Mphage-like3
TNFSF10	4.73035e-12	0.809771	0.44	0.149	5.93233e-08	GBM.PD1	TNFSF10	0.291	FN1-TREM2-IL10-Mphage-like3
SYAP1	0.000941934	0.982169	0.356	0.15	1	GBM.rec	SYAP1	0.206	LowRead
ERRFI1	3.34281e-09	0.807772	0.407	0.132	4.19222e-05	GBM.rec	ERRFI1	0.275	FN1-TREM2-IL10-Mphage-like3
MARCO	0.00613153	0.980413	0.533	0.466	1	GBM.new	MARCO	0.067	FN1-TREM2-IL10-Mphage-like3
AREG	8.69583e-10	0.792643	0.827	0.602	1.09054e-05	GBM.PD1	AREG	0.225	FN1-TREM2-IL10-Mphage-like3
HLA-DRB1	2.82209e-21	0.784128	0.97	0.816	3.53918e-17	GBM.PD1	HLA-DRB1	0.154	FN1-TREM2-IL10-Mphage-like3
JUND	3.82463e-10	0.780251	0.852	0.712	4.79647e-06	GBM.rec	JUND	0.14	FN1-TREM2-IL10-Mphage-like3
PHACTR1	0.000844467	0.97586	0.301	0.117	1	GBM.rec	PHACTR1	0.184	LowRead
BNIP3	6.28067e-08	0.771707	0.375	0.141	0.000787659	GBM.new	BNIP3	0.234	FN1-TREM2-IL10-Mphage-like3
LGALS1	2.01025e-12	0.764389	0.867	0.956	2.52105e-08	GBM.new	LGALS1	-0.089	FN1-TREM2-IL10-Mphage-like3
SLC16A3	8.39289e-08	0.764166	0.775	0.779	0.00105255	GBM.new	SLC16A3	-0.004	FN1-TREM2-IL10-Mphage-like3
LRRK2	1.83858e-16	0.762888	0.565	0.174	2.30576e-12	GBM.PD1	LRRK2	0.391	FN1-TREM2-IL10-Mphage-like3
FCGBP	0.000882268	0.970381	0.299	0.165	1	GBM.new	FCGBP	0.134	LILRB2-CD48-ITGAL-Mono2
SET	0.00142189	0.969772	0.322	0.134	1	GBM.PD1	SET	0.188	LowRead
LDHA	9.44859e-05	0.967121	0.714	0.775	1	GBM.new	LDHA	-0.061	CCL3-4-IL1B-MRC1-Mphage-like1
EEF1G	4.99807e-12	0.75571	0.44	0.124	6.26808e-08	GBM.PD1	EEF1G	0.316	FN1-TREM2-IL10-Mphage-like3
ABL2	0.00228759	0.962804	0.513	0.422	1	GBM.new	ABL2	0.091	GPNMB-ANGPTL4-CXCL8-Mphage-like2
DUSP2	2.32854e-11	0.750453	0.69	0.363	2.92022e-07	GBM.PD1	DUSP2	0.327	FN1-TREM2-IL10-Mphage-like3
LYAR	2.62685e-07	0.740639	0.556	0.292	0.00329433	GBM.rec	LYAR	0.264	FN1-TREM2-IL10-Mphage-like3
LIMD2	7.31665e-17	0.739926	0.649	0.259	9.17581e-13	GBM.PD1	LIMD2	0.39	FN1-TREM2-IL10-Mphage-like3
PSME1	5.72565e-20	0.732136	0.911	0.642	7.18053e-16	GBM.PD1	PSME1	0.269	FN1-TREM2-IL10-Mphage-like3
RGS19	0.00341939	0.954852	0.26	0.108	1	GBM.rec	RGS19	0.152	LowRead
APOBEC3A	1.12081e-07	0.727613	0.375	0.134	0.00140561	GBM.PD1	APOBEC3A	0.241	FN1-TREM2-IL10-Mphage-like3
HLA-DMB	4.27899e-17	0.727426	0.815	0.468	5.36628e-13	GBM.PD1	HLA-DMB	0.347	FN1-TREM2-IL10-Mphage-like3
STOM	4.63973e-05	0.949475	0.254	0.052	0.581869	GBM.PD1	STOM	0.202	LowRead
IFI6	1.31907e-15	0.72601	0.762	0.383	1.65424e-11	GBM.PD1	IFI6	0.379	FN1-TREM2-IL10-Mphage-like3
IFNGR1	0.000566235	0.94723	0.301	0.117	1	GBM.rec	IFNGR1	0.184	LowRead
LGALS1	6.37275e-06	0.944402	0.721	0.561	0.0799206	GBM.new	LGALS1	0.16	LowRead
HLA-DQB1	2.85283e-19	0.721956	0.929	0.612	3.57774e-15	GBM.PD1	HLA-DQB1	0.317	FN1-TREM2-IL10-Mphage-like3
TRIM22	6.64514e-17	0.719556	0.625	0.234	8.33367e-13	GBM.PD1	TRIM22	0.391	FN1-TREM2-IL10-Mphage-like3
CD14	2.39485e-07	0.717105	0.833	0.884	0.00300338	GBM.new	CD14	-0.051	FN1-TREM2-IL10-Mphage-like3
TAP1	9.7918e-14	0.710032	0.512	0.174	1.22799e-09	GBM.PD1	TAP1	0.338	FN1-TREM2-IL10-Mphage-like3
GBP2	5.08468e-18	0.703186	0.667	0.264	6.37669e-14	GBM.PD1	GBP2	0.403	FN1-TREM2-IL10-Mphage-like3
CTSD	2.70107e-07	0.699958	0.808	0.815	0.00338741	GBM.new	CTSD	-0.007	FN1-TREM2-IL10-Mphage-like3
C3	1.4711e-08	0.694114	0.571	0.333	0.000184491	GBM.PD1	C3	0.238	FN1-TREM2-IL10-Mphage-like3
DNAJB1	0.00166854	0.927846	0.675	0.625	1	GBM.new	DNAJB1	0.05	CCL3-4-IL1B-MRC1-Mphage-like1
IRF7	1.59883e-12	0.691431	0.56	0.244	2.00509e-08	GBM.PD1	IRF7	0.316	FN1-TREM2-IL10-Mphage-like3
CTSL	2.9922e-05	0.926035	0.717	0.683	0.375252	GBM.new	CTSL	0.034	FN1-TREM2-IL10-Mphage-like3
C1QB	0.000174625	0.924926	0.678	0.577	1	GBM.rec	C1QB	0.101	GPNMB-ANGPTL4-CXCL8-Mphage-like2
SP110	2.16322e-13	0.685878	0.56	0.224	2.7129e-09	GBM.PD1	SP110	0.336	FN1-TREM2-IL10-Mphage-like3
MAN2B1	6.27625e-10	0.685511	0.381	0.124	7.87105e-06	GBM.PD1	MAN2B1	0.257	FN1-TREM2-IL10-Mphage-like3
IFIT3	2.49499e-17	0.680833	0.423	0.055	3.12897e-13	GBM.PD1	IFIT3	0.368	FN1-TREM2-IL10-Mphage-like3
CD37	5.91622e-11	0.677959	0.833	0.602	7.41954e-07	GBM.PD1	CD37	0.231	FN1-TREM2-IL10-Mphage-like3
ANKRD22	2.58743e-13	0.665001	0.417	0.104	3.24489e-09	GBM.PD1	ANKRD22	0.313	FN1-TREM2-IL10-Mphage-like3
FCGR1B	2.98525e-15	0.654055	0.482	0.124	3.7438e-11	GBM.PD1	FCGR1B	0.358	FN1-TREM2-IL10-Mphage-like3
ZBTB16	1.80497e-17	0.646223	0.53	0.129	2.26362e-13	GBM.PD1	ZBTB16	0.401	FN1-TREM2-IL10-Mphage-like3
AOAH	3.04379e-15	0.645276	0.696	0.343	3.81722e-11	GBM.PD1	AOAH	0.353	FN1-TREM2-IL10-Mphage-like3
GSTK1	5.96175e-16	0.641976	0.833	0.512	7.47663e-12	GBM.PD1	GSTK1	0.321	FN1-TREM2-IL10-Mphage-like3
HLA-C	6.03383e-20	0.639957	0.976	0.831	7.56703e-16	GBM.PD1	HLA-C	0.145	FN1-TREM2-IL10-Mphage-like3
RETN	0.00556923	0.908255	0.44	0.311	1	GBM.rec	RETN	0.129	CCL3-4-IL1B-MRC1-Mphage-like1
SYNGR2	1.01877e-15	0.63323	0.786	0.453	1.27764e-11	GBM.PD1	SYNGR2	0.333	FN1-TREM2-IL10-Mphage-like3
FKBP5	1.68662e-14	0.632543	0.851	0.552	2.11519e-10	GBM.PD1	FKBP5	0.299	FN1-TREM2-IL10-Mphage-like3
ALCAM	2.09838e-06	0.630222	0.506	0.274	0.0263158	GBM.rec	ALCAM	0.232	FN1-TREM2-IL10-Mphage-like3
FOLR2	5.71705e-10	0.617396	0.37	0.097	7.16975e-06	GBM.rec	FOLR2	0.273	FN1-TREM2-IL10-Mphage-like3
HMOX1	0.000898476	0.902672	0.672	0.675	1	GBM.new	HMOX1	-0.003	GPNMB-ANGPTL4-CXCL8-Mphage-like2
CST3	5.95983e-12	0.614825	0.994	0.891	7.47422e-08	GBM.PD1	CST3	0.103	FN1-TREM2-IL10-Mphage-like3
LDHB	0.00243174	0.901263	0.322	0.142	1	GBM.PD1	LDHB	0.18	LowRead
LGALS3BP	1.49386e-07	0.607858	0.44	0.224	0.00187345	GBM.PD1	LGALS3BP	0.216	FN1-TREM2-IL10-Mphage-like3
ANXA1	3.11204e-06	0.606522	0.84	0.806	0.0390281	GBM.rec	ANXA1	0.034	FN1-TREM2-IL10-Mphage-like3
C1orf162	8.1175e-14	0.596368	0.976	0.746	1.01802e-09	GBM.PD1	C1orf162	0.23	FN1-TREM2-IL10-Mphage-like3
STAT1	3.15504e-05	0.889694	0.339	0.097	0.395674	GBM.PD1	STAT1	0.242	LowRead
CXCL9	1.27619e-31	2.38583	0.417	0.01	1.60047e-27	GBM.PD1	CXCL9	0.407	FN1-TREM2-RETN-VSIG4-Mphage-like4
CCL20	2.23144e-06	2.04549	0.306	0.157	0.0279845	GBM.new	CCL20	0.149	FN1-TREM2-RETN-VSIG4-Mphage-like4
RETN	6.14388e-15	1.86677	0.632	0.352	7.70504e-11	GBM.rec	RETN	0.28	FN1-TREM2-RETN-VSIG4-Mphage-like4
CXCL10	1.56497e-23	1.75027	0.385	0.033	1.96263e-19	GBM.PD1	CXCL10	0.352	FN1-TREM2-RETN-VSIG4-Mphage-like4
APOC1	0.000234696	0.881547	0.591	0.529	1	GBM.new	APOC1	0.062	FN1-TREM2-RETN-VSIG4-Mphage-like4
SERPINB9	7.35746e-05	0.88105	0.317	0.578	0.922699	GBM.new	SERPINB9	-0.261	FN1-TREM2-RETN-VSIG4-Mphage-like4
VAMP5	1.0299e-49	1.73185	0.854	0.29	1.2916e-45	GBM.PD1	VAMP5	0.564	FN1-TREM2-RETN-VSIG4-Mphage-like4
IFITM1	2.2887e-37	1.69227	0.505	0.023	2.87025e-33	GBM.PD1	IFITM1	0.482	FN1-TREM2-RETN-VSIG4-Mphage-like4
FCGBP	1.84076e-05	0.877177	0.275	0.108	0.230849	GBM.new	FCGBP	0.167	FN1-TREM2-IL10-Mphage-like3
ADM	1.08665e-05	0.874864	0.567	0.386	0.136277	GBM.new	ADM	0.181	FN1-TREM2-IL10-Mphage-like3
SPP1	4.48861e-48	1.67843	0.968	0.569	5.62916e-44	GBM.new	SPP1	0.399	FN1-TREM2-RETN-VSIG4-Mphage-like4
IFITM3	1.03932e-37	1.65806	0.87	0.427	1.30341e-33	GBM.PD1	IFITM3	0.443	FN1-TREM2-RETN-VSIG4-Mphage-like4
GBP1	6.60143e-36	1.60385	0.646	0.127	8.27885e-32	GBM.PD1	GBP1	0.519	FN1-TREM2-RETN-VSIG4-Mphage-like4
NFKBIA	4.11488e-06	0.8706	0.742	0.908	0.0516047	GBM.new	NFKBIA	-0.166	FN1-TREM2-RETN-VSIG4-Mphage-like4
G0S2	1.19025e-15	1.60259	0.597	0.317	1.49269e-11	GBM.new	G0S2	0.28	FN1-TREM2-RETN-VSIG4-Mphage-like4
CFD	6.53553e-14	1.54741	0.746	0.519	8.19621e-10	GBM.rec	CFD	0.227	FN1-TREM2-RETN-VSIG4-Mphage-like4
LYZ	5.12871e-14	1.52589	0.895	0.738	6.43191e-10	GBM.rec	LYZ	0.157	FN1-TREM2-RETN-VSIG4-Mphage-like4
RARRES3	6.89699e-59	1.51136	0.818	0.127	8.64951e-55	GBM.PD1	RARRES3	0.691	FN1-TREM2-RETN-VSIG4-Mphage-like4
SERPING1	2.38363e-52	1.49347	0.74	0.09	2.98931e-48	GBM.PD1	SERPING1	0.65	FN1-TREM2-RETN-VSIG4-Mphage-like4
LGALS9	0.00931841	0.863424	0.322	0.157	1	GBM.PD1	LGALS9	0.165	LowRead
RNASE1	0.00590926	0.862129	0.299	0.17	1	GBM.new	RNASE1	0.129	CCL3-4-IL1B-MRC1-Mphage-like1
C1QA	8.92473e-05	0.862028	0.722	0.589	1	GBM.rec	C1QA	0.133	GPNMB-ANGPTL4-CXCL8-Mphage-like2
STAT1	2.0058e-41	1.41944	0.75	0.217	2.51547e-37	GBM.PD1	STAT1	0.533	FN1-TREM2-RETN-VSIG4-Mphage-like4
ACSL1	1.87006e-05	0.850726	0.398	0.709	0.234524	GBM.new	ACSL1	-0.311	FN1-TREM2-RETN-VSIG4-Mphage-like4
NME2	0.00014438	0.850218	0.26	0.102	1	GBM.PD1	NME2	0.158	CCL3-4-IL1B-MRC1-Mphage-like1
GABARAP	2.30613e-20	1.41282	0.693	0.343	2.89211e-16	GBM.PD1	GABARAP	0.35	FN1-TREM2-RETN-VSIG4-Mphage-like4
HLA-DQA1	1.90798e-42	1.40739	0.906	0.437	2.3928e-38	GBM.PD1	HLA-DQA1	0.469	FN1-TREM2-RETN-VSIG4-Mphage-like4
IDO1	7.79312e-22	1.36295	0.276	0	9.77335e-18	GBM.PD1	IDO1	0.276	FN1-TREM2-RETN-VSIG4-Mphage-like4
GBP5	1.73235e-43	1.3384	0.635	0.073	2.17254e-39	GBM.PD1	GBP5	0.562	FN1-TREM2-RETN-VSIG4-Mphage-like4
PLAC8	0.000219985	0.847662	0.509	0.357	1	GBM.rec	PLAC8	0.152	FN1-TREM2-RETN-VSIG4-Mphage-like4
CD74	2.68798e-27	1.28065	0.995	0.873	3.37099e-23	GBM.PD1	CD74	0.122	FN1-TREM2-RETN-VSIG4-Mphage-like4
CALHM6	8.63609e-42	1.27195	0.802	0.247	1.08305e-37	GBM.PD1	CALHM6	0.555	FN1-TREM2-RETN-VSIG4-Mphage-like4
S100A12	0.000692652	0.845338	0.525	0.341	1	GBM.new	S100A12	0.184	LowRead
CCL4	2.66665e-09	1.26264	0.543	0.363	3.34425e-05	GBM.new	CCL4	0.18	FN1-TREM2-RETN-VSIG4-Mphage-like4
PSME2	3.08699e-44	1.24082	0.906	0.48	3.87139e-40	GBM.PD1	PSME2	0.426	FN1-TREM2-RETN-VSIG4-Mphage-like4
PLIN2	0.00103991	0.843776	0.667	0.784	1	GBM.new	PLIN2	-0.117	FN1-TREM2-RETN-VSIG4-Mphage-like4
RNASEK	1.17894e-20	1.18188	0.542	0.183	1.47851e-16	GBM.PD1	RNASEK	0.359	FN1-TREM2-RETN-VSIG4-Mphage-like4
JAML	3.08861e-05	0.842004	0.411	0.158	0.387342	GBM.rec	JAML	0.253	LowRead
HAVCR2	0.00067477	0.841796	0.271	0.082	1	GBM.PD1	HAVCR2	0.189	LowRead
RNASE1	0.00875968	0.840784	0.29	0.219	1	GBM.new	RNASE1	0.071	FN1-TREM2-RETN-VSIG4-Mphage-like4
PSMB9	1.46195e-40	1.13616	0.844	0.357	1.83344e-36	GBM.PD1	PSMB9	0.487	FN1-TREM2-RETN-VSIG4-Mphage-like4
AZU1	3.22347e-17	1.12296	0.272	0.026	4.04255e-13	GBM.rec	AZU1	0.246	FN1-TREM2-RETN-VSIG4-Mphage-like4
SEC61G	3.26552e-05	0.838111	0.697	0.709	0.409529	GBM.new	SEC61G	-0.012	GPNMB-ANGPTL4-CXCL8-Mphage-like2
CELF2	0.000822906	0.837968	0.441	0.209	1	GBM.PD1	CELF2	0.232	LowRead
CCL3	9.29034e-07	1.09941	0.57	0.454	0.011651	GBM.new	CCL3	0.116	FN1-TREM2-RETN-VSIG4-Mphage-like4
ALDOA	1.7964e-13	1.07965	0.594	0.34	2.25286e-09	GBM.PD1	ALDOA	0.254	FN1-TREM2-RETN-VSIG4-Mphage-like4
FBP1	0.000314005	0.836614	0.412	0.303	1	GBM.new	FBP1	0.109	FCN1-SELL-S100A8-9-Mono1
LAMTOR4	0.00618392	0.83641	0.525	0.447	1	GBM.new	LAMTOR4	0.078	LowRead
CXCL8	2.42266e-09	1.07602	0.5	0.297	3.03826e-05	GBM.new	CXCL8	0.203	FN1-TREM2-RETN-VSIG4-Mphage-like4
NME2	6.12531e-16	1.07597	0.453	0.15	7.68176e-12	GBM.PD1	NME2	0.303	FN1-TREM2-RETN-VSIG4-Mphage-like4
BNIP3	3.99497e-06	0.833068	0.273	0.075	0.0501009	GBM.new	BNIP3	0.198	CCL3-4-IL1B-MRC1-Mphage-like1
RAC2	0.00341371	0.832713	0.315	0.142	1	GBM.rec	RAC2	0.173	LowRead
HLA-DPA1	7.65886e-37	1.06962	0.974	0.693	9.60498e-33	GBM.PD1	HLA-DPA1	0.281	FN1-TREM2-RETN-VSIG4-Mphage-like4
MARCO	0.00674119	0.830822	0.282	0.205	1	GBM.new	MARCO	0.077	FCN1-SELL-S100A8-9-Mono1
PARP14	0.00329577	0.82993	0.254	0.097	1	GBM.PD1	PARP14	0.157	LowRead
THBS1	2.02402e-12	1.06595	0.711	0.458	2.53833e-08	GBM.rec	THBS1	0.253	FN1-TREM2-RETN-VSIG4-Mphage-like4
TIMP1	0.00460904	0.829052	0.93	0.846	1	GBM.rec	TIMP1	0.084	GPNMB-ANGPTL4-CXCL8-Mphage-like2
MRC1	2.37104e-15	1.04516	0.605	0.257	2.97352e-11	GBM.rec	MRC1	0.348	FN1-TREM2-RETN-VSIG4-Mphage-like4
EEF1G	1.6129e-25	1.04484	0.51	0.093	2.02274e-21	GBM.PD1	EEF1G	0.417	FN1-TREM2-RETN-VSIG4-Mphage-like4
LY6E	2.30841e-35	1.04123	0.823	0.307	2.89498e-31	GBM.PD1	LY6E	0.516	FN1-TREM2-RETN-VSIG4-Mphage-like4
FGL2	2.27068e-29	1.03601	0.833	0.383	2.84766e-25	GBM.PD1	FGL2	0.45	FN1-TREM2-RETN-VSIG4-Mphage-like4
UBE2L6	1.12926e-41	1.02926	0.797	0.257	1.41621e-37	GBM.PD1	UBE2L6	0.54	FN1-TREM2-RETN-VSIG4-Mphage-like4
LAPTM4A	8.47068e-05	0.819289	0.288	0.075	1	GBM.PD1	LAPTM4A	0.213	LowRead
ISG20	1.30188e-37	1.02475	0.646	0.097	1.63269e-33	GBM.PD1	ISG20	0.549	FN1-TREM2-RETN-VSIG4-Mphage-like4
EPSTI1	9.36863e-43	1.00249	0.745	0.163	1.17492e-38	GBM.PD1	EPSTI1	0.582	FN1-TREM2-RETN-VSIG4-Mphage-like4
CCL5	8.26852e-05	0.816852	0.276	0.124	1	GBM.PD1	CCL5	0.152	LILRB2-CD48-ITGAL-Mono2
SGK1	0.00899291	0.816702	0.462	0.729	1	GBM.new	SGK1	-0.267	FN1-TREM2-RETN-VSIG4-Mphage-like4
GBE1	4.09546e-06	0.815694	0.454	0.253	0.0513611	GBM.new	GBE1	0.201	GPNMB-ANGPTL4-CXCL8-Mphage-like2
CST3	2.1741e-29	0.996279	0.979	0.713	2.72654e-25	GBM.PD1	CST3	0.266	FN1-TREM2-RETN-VSIG4-Mphage-like4
HLA-DRB1	8.99998e-36	0.984588	0.979	0.74	1.12869e-31	GBM.PD1	HLA-DRB1	0.239	FN1-TREM2-RETN-VSIG4-Mphage-like4
IL2RA	3.01833e-19	0.966889	0.421	0.082	3.78529e-15	GBM.rec	IL2RA	0.339	FN1-TREM2-RETN-VSIG4-Mphage-like4
PSME1	2.32939e-37	0.960582	0.896	0.497	2.92129e-33	GBM.PD1	PSME1	0.399	FN1-TREM2-RETN-VSIG4-Mphage-like4
THBS1	0.000735829	0.808855	0.553	0.431	1	GBM.rec	THBS1	0.122	LILRB2-CD48-ITGAL-Mono2
ARF5	0.000222585	0.808687	0.301	0.1	1	GBM.rec	ARF5	0.201	LowRead
APOBEC3A	0.00291177	0.808578	0.47	0.311	1	GBM.PD1	APOBEC3A	0.159	CCL3-4-IL1B-MRC1-Mphage-like1
AREG	5.12241e-13	0.955478	0.76	0.463	6.42402e-09	GBM.PD1	AREG	0.297	FN1-TREM2-RETN-VSIG4-Mphage-like4
CTSD	0.000704649	0.80516	0.651	0.791	1	GBM.new	CTSD	-0.14	FN1-TREM2-RETN-VSIG4-Mphage-like4
WARS	2.60895e-26	0.941305	0.698	0.277	3.27188e-22	GBM.PD1	WARS	0.421	FN1-TREM2-RETN-VSIG4-Mphage-like4
P4HA1	0.000604272	0.801202	0.521	0.451	1	GBM.new	P4HA1	0.07	GPNMB-ANGPTL4-CXCL8-Mphage-like2
VASP	0.00101757	0.80092	0.356	0.15	1	GBM.rec	VASP	0.206	LowRead
ARL4A	3.60707e-11	0.934359	0.605	0.349	4.52363e-07	GBM.rec	ARL4A	0.256	FN1-TREM2-RETN-VSIG4-Mphage-like4
TMED10	4.72532e-05	0.79846	0.288	0.075	0.592603	GBM.rec	TMED10	0.213	LowRead
IRF1	7.45307e-34	0.921687	0.734	0.213	9.34689e-30	GBM.PD1	IRF1	0.521	FN1-TREM2-RETN-VSIG4-Mphage-like4
MDM4	0.00157539	0.795323	0.254	0.082	1	GBM.PD1	MDM4	0.172	LowRead
ZFP36L1	0.000105978	0.793101	0.75	0.767	1	GBM.new	ZFP36L1	-0.017	FN1-TREM2-IL10-Mphage-like3
LAP3	9.10485e-41	0.907052	0.87	0.403	1.14184e-36	GBM.PD1	LAP3	0.467	FN1-TREM2-RETN-VSIG4-Mphage-like4
SERPINA1	3.64444e-17	0.898789	0.906	0.597	4.57049e-13	GBM.PD1	SERPINA1	0.309	FN1-TREM2-RETN-VSIG4-Mphage-like4
IFI6	8.20576e-32	0.886543	0.792	0.287	1.02908e-27	GBM.PD1	IFI6	0.505	FN1-TREM2-RETN-VSIG4-Mphage-like4
GABARAP	0.000746557	0.791006	0.63	0.418	1	GBM.PD1	GABARAP	0.212	CCL3-4-IL1B-MRC1-Mphage-like1
HLA-DQB1	2.0451e-32	0.885451	0.943	0.557	2.56476e-28	GBM.PD1	HLA-DQB1	0.386	FN1-TREM2-RETN-VSIG4-Mphage-like4
SLC38A2	1.38794e-05	0.788539	0.622	0.489	0.174062	GBM.new	SLC38A2	0.133	GPNMB-ANGPTL4-CXCL8-Mphage-like2
CYTH1	0.00446697	0.788114	0.237	0.408	1	GBM.new	CYTH1	-0.171	FN1-TREM2-RETN-VSIG4-Mphage-like4
C1QB	0.00165946	0.786864	0.649	0.571	1	GBM.rec	C1QB	0.078	FN1-TREM2-RETN-VSIG4-Mphage-like4
MAN2B1	6.81863e-23	0.879943	0.521	0.14	8.55124e-19	GBM.PD1	MAN2B1	0.381	FN1-TREM2-RETN-VSIG4-Mphage-like4
HLA-DPB1	6.23577e-29	0.864921	0.953	0.7	7.82027e-25	GBM.PD1	HLA-DPB1	0.253	FN1-TREM2-RETN-VSIG4-Mphage-like4
FCGR1A	1.943e-32	0.860978	0.839	0.34	2.43672e-28	GBM.PD1	FCGR1A	0.499	FN1-TREM2-RETN-VSIG4-Mphage-like4
GBP1	4.16615e-06	0.784872	0.487	0.309	0.0522477	GBM.PD1	GBP1	0.178	LILRB2-CD48-ITGAL-Mono2
FCN1	8.77582e-08	0.847569	0.632	0.413	0.00110058	GBM.rec	FCN1	0.219	FN1-TREM2-RETN-VSIG4-Mphage-like4
LDHA	2.39676e-05	0.783128	0.808	0.884	0.300577	GBM.new	LDHA	-0.076	FN1-TREM2-IL10-Mphage-like3
SNX10	2.12101e-31	0.844969	0.833	0.353	2.65996e-27	GBM.PD1	SNX10	0.48	FN1-TREM2-RETN-VSIG4-Mphage-like4
TNFSF10	2.0716e-30	0.842147	0.615	0.14	2.598e-26	GBM.PD1	TNFSF10	0.475	FN1-TREM2-RETN-VSIG4-Mphage-like4
SNAPC1	1.84507e-05	0.782447	0.437	0.262	0.231391	GBM.new	SNAPC1	0.175	GPNMB-ANGPTL4-CXCL8-Mphage-like2
VSIR	8.69643e-31	0.831002	0.859	0.46	1.09062e-26	GBM.PD1	VSIR	0.399	FN1-TREM2-RETN-VSIG4-Mphage-like4
LYAR	5.82771e-12	0.829703	0.535	0.265	7.30853e-08	GBM.rec	LYAR	0.27	FN1-TREM2-RETN-VSIG4-Mphage-like4
DHRS3	2.0849e-05	0.776258	0.475	0.297	0.261467	GBM.new	DHRS3	0.178	FN1-TREM2-IL10-Mphage-like3
BNIP3	7.74339e-05	0.775647	0.429	0.274	0.971099	GBM.new	BNIP3	0.155	GPNMB-ANGPTL4-CXCL8-Mphage-like2
IFITM3	2.24969e-05	0.773078	0.83	0.65	0.282134	GBM.PD1	IFITM3	0.18	CCL3-4-IL1B-MRC1-Mphage-like1
TAP1	3.76105e-34	0.826245	0.672	0.173	4.71673e-30	GBM.PD1	TAP1	0.499	FN1-TREM2-RETN-VSIG4-Mphage-like4
APOBEC3A	9.93785e-17	0.824134	0.339	0.053	1.24631e-12	GBM.PD1	APOBEC3A	0.286	FN1-TREM2-RETN-VSIG4-Mphage-like4
CCL2	0.00236453	0.771963	0.313	0.162	1	GBM.rec	CCL2	0.151	GPNMB-ANGPTL4-CXCL8-Mphage-like2
ZYX	5.4315e-19	0.819884	0.792	0.447	6.81165e-15	GBM.PD1	ZYX	0.345	FN1-TREM2-RETN-VSIG4-Mphage-like4
UBE2D1	0.00140336	0.770834	0.274	0.1	1	GBM.rec	UBE2D1	0.174	LowRead
IER3	0.00203447	0.770581	0.641	0.658	1	GBM.new	IER3	-0.017	LILRB2-CD48-ITGAL-Mono2
HSP90B1	2.0447e-05	0.770068	0.807	0.726	0.256426	GBM.new	HSP90B1	0.081	GPNMB-ANGPTL4-CXCL8-Mphage-like2
FCGR1B	1.38624e-33	0.819281	0.661	0.133	1.73848e-29	GBM.PD1	FCGR1B	0.528	FN1-TREM2-RETN-VSIG4-Mphage-like4
LRPAP1	3.99862e-13	0.811156	0.746	0.5	5.01467e-09	GBM.rec	LRPAP1	0.246	FN1-TREM2-RETN-VSIG4-Mphage-like4
PSMB10	5.15721e-25	0.79758	0.714	0.3	6.46766e-21	GBM.PD1	PSMB10	0.414	FN1-TREM2-RETN-VSIG4-Mphage-like4
MCEMP1	1.29801e-11	0.792388	0.614	0.307	1.62784e-07	GBM.rec	MCEMP1	0.307	FN1-TREM2-RETN-VSIG4-Mphage-like4
PPA1	8.08899e-27	0.790039	0.812	0.353	1.01444e-22	GBM.PD1	PPA1	0.459	FN1-TREM2-RETN-VSIG4-Mphage-like4
CD93	0.00133198	0.762117	0.588	0.523	1	GBM.new	CD93	0.065	GPNMB-ANGPTL4-CXCL8-Mphage-like2
ITGB2	0.000446622	0.760207	0.593	0.351	1	GBM.PD1	ITGB2	0.242	LowRead
TNFSF13	3.53195e-21	0.7862	0.401	0.063	4.42941e-17	GBM.PD1	TNFSF13	0.338	FN1-TREM2-RETN-VSIG4-Mphage-like4
IFITM2	1.008e-23	0.786136	0.844	0.453	1.26414e-19	GBM.PD1	IFITM2	0.391	FN1-TREM2-RETN-VSIG4-Mphage-like4
THBD	0.000168498	0.757175	0.622	0.494	1	GBM.new	THBD	0.128	GPNMB-ANGPTL4-CXCL8-Mphage-like2
LGALS1	0.000334513	0.757136	0.727	0.89	1	GBM.new	LGALS1	-0.163	CCL3-4-IL1B-MRC1-Mphage-like1
TRIM22	1.27349e-29	0.782623	0.677	0.217	1.59708e-25	GBM.PD1	TRIM22	0.46	FN1-TREM2-RETN-VSIG4-Mphage-like4
WDR83OS	0.00151739	0.753889	0.425	0.208	1	GBM.rec	WDR83OS	0.217	LowRead
POLD4	3.06486e-17	0.764183	0.542	0.203	3.84364e-13	GBM.PD1	POLD4	0.339	FN1-TREM2-RETN-VSIG4-Mphage-like4
FCN1	0.000466229	0.753186	0.461	0.311	1	GBM.rec	FCN1	0.15	GPNMB-ANGPTL4-CXCL8-Mphage-like2
ZBTB16	5.87706e-34	0.760185	0.615	0.097	7.37043e-30	GBM.PD1	ZBTB16	0.518	FN1-TREM2-RETN-VSIG4-Mphage-like4
GBP4	8.11911e-26	0.757469	0.516	0.103	1.01822e-21	GBM.PD1	GBP4	0.413	FN1-TREM2-RETN-VSIG4-Mphage-like4
APLP2	7.30517e-15	0.747459	0.816	0.63	9.16142e-11	GBM.rec	APLP2	0.186	FN1-TREM2-RETN-VSIG4-Mphage-like4
TMF1	0.000562226	0.750233	0.254	0.075	1	GBM.PD1	TMF1	0.179	LowRead
CD37	6.62807e-24	0.746694	0.885	0.5	8.31226e-20	GBM.PD1	CD37	0.385	FN1-TREM2-RETN-VSIG4-Mphage-like4
FBP1	2.18003e-10	0.745371	0.763	0.513	2.73398e-06	GBM.rec	FBP1	0.25	FN1-TREM2-RETN-VSIG4-Mphage-like4
PSMA6	9.39261e-18	0.732603	0.568	0.22	1.17793e-13	GBM.PD1	PSMA6	0.348	FN1-TREM2-RETN-VSIG4-Mphage-like4
CD37	0.000134881	0.744634	0.521	0.25	1	GBM.rec	CD37	0.271	LowRead
MX1	4.89806e-34	0.715038	0.63	0.113	6.14265e-30	GBM.PD1	MX1	0.517	FN1-TREM2-RETN-VSIG4-Mphage-like4
C1orf162	4.92378e-25	0.709058	0.927	0.567	6.17491e-21	GBM.PD1	C1orf162	0.36	FN1-TREM2-RETN-VSIG4-Mphage-like4
OLFML3	6.93586e-21	0.708208	0.406	0.063	8.69827e-17	GBM.PD1	OLFML3	0.343	FN1-TREM2-RETN-VSIG4-Mphage-like4
JAML	2.3831e-07	0.70797	0.518	0.328	0.00298864	GBM.rec	JAML	0.19	FN1-TREM2-RETN-VSIG4-Mphage-like4
APOE	1.39753e-07	0.704517	0.715	0.621	0.00175264	GBM.new	APOE	0.094	FN1-TREM2-RETN-VSIG4-Mphage-like4
SLAMF7	4.60386e-23	0.693037	0.318	0.01	5.77371e-19	GBM.PD1	SLAMF7	0.308	FN1-TREM2-RETN-VSIG4-Mphage-like4
CXCL8	2.01563e-05	0.73887	0.564	0.38	0.25278	GBM.new	CXCL8	0.184	LILRB2-CD48-ITGAL-Mono2
SLAMF8	9.90535e-27	0.691905	0.578	0.137	1.24223e-22	GBM.PD1	SLAMF8	0.441	FN1-TREM2-RETN-VSIG4-Mphage-like4
B2M	7.22044e-37	0.688921	0.99	0.947	9.05515e-33	GBM.PD1	B2M	0.043	FN1-TREM2-RETN-VSIG4-Mphage-like4
BOD1L1	0.0026915	0.736919	0.271	0.104	1	GBM.PD1	BOD1L1	0.167	LowRead
FYB1	6.95939e-29	0.679701	0.891	0.493	8.72778e-25	GBM.PD1	FYB1	0.398	FN1-TREM2-RETN-VSIG4-Mphage-like4
LGALS2	8.00547e-15	0.674021	0.328	0.06	1.00397e-10	GBM.PD1	LGALS2	0.268	FN1-TREM2-RETN-VSIG4-Mphage-like4
ITGAX	4.73725e-05	0.73338	0.78	0.61	0.594098	GBM.rec	ITGAX	0.17	CCL3-4-IL1B-MRC1-Mphage-like1
IL2RA	1.55533e-05	0.732932	0.27	0.085	0.195054	GBM.rec	IL2RA	0.185	CCL3-4-IL1B-MRC1-Mphage-like1
UBA52	9.1671e-06	0.732861	0.787	0.72	0.114965	GBM.new	UBA52	0.067	LowRead
HK2	0.000357257	0.732654	0.462	0.325	1	GBM.new	HK2	0.137	GPNMB-ANGPTL4-CXCL8-Mphage-like2
TNFSF13B	8.5897e-29	0.667931	0.812	0.347	1.07723e-24	GBM.PD1	TNFSF13B	0.465	FN1-TREM2-RETN-VSIG4-Mphage-like4
ARPC1B	1.5575e-18	0.664625	0.896	0.56	1.95327e-14	GBM.PD1	ARPC1B	0.336	FN1-TREM2-RETN-VSIG4-Mphage-like4
EREG	5.29639e-05	0.729113	0.613	0.435	0.66422	GBM.new	EREG	0.178	GPNMB-ANGPTL4-CXCL8-Mphage-like2
GSTK1	5.62504e-25	0.65964	0.844	0.453	7.05436e-21	GBM.PD1	GSTK1	0.391	FN1-TREM2-RETN-VSIG4-Mphage-like4
APOL6	2.67569e-20	0.657402	0.521	0.167	3.35558e-16	GBM.PD1	APOL6	0.354	FN1-TREM2-RETN-VSIG4-Mphage-like4
LGALS3BP	1.70112e-22	0.656802	0.599	0.187	2.13338e-18	GBM.PD1	LGALS3BP	0.412	FN1-TREM2-RETN-VSIG4-Mphage-like4
CTSS	7.62486e-20	0.65598	0.922	0.597	9.56234e-16	GBM.PD1	CTSS	0.325	FN1-TREM2-RETN-VSIG4-Mphage-like4
HLA-C	1.17036e-24	0.651123	0.969	0.71	1.46775e-20	GBM.PD1	HLA-C	0.259	FN1-TREM2-RETN-VSIG4-Mphage-like4
SPTLC2	0.000306202	0.725774	0.305	0.097	1	GBM.PD1	SPTLC2	0.208	LowRead
SYNGR2	3.67805e-22	0.647708	0.812	0.41	4.61264e-18	GBM.PD1	SYNGR2	0.402	FN1-TREM2-RETN-VSIG4-Mphage-like4
IL1R2	0.00544133	0.724318	0.333	0.232	1	GBM.new	IL1R2	0.101	LILRB2-CD48-ITGAL-Mono2
CYP27A1	6.66574e-22	0.645251	0.395	0.05	8.3595e-18	GBM.rec	CYP27A1	0.345	FN1-TREM2-RETN-VSIG4-Mphage-like4
CD163	0.00288303	0.724138	0.725	0.851	1	GBM.new	CD163	-0.126	FN1-TREM2-IL10-Mphage-like3
ANKRD22	3.78192e-20	0.637655	0.516	0.153	4.7429e-16	GBM.PD1	ANKRD22	0.363	FN1-TREM2-RETN-VSIG4-Mphage-like4
SEC14L1	1.52584e-08	0.63331	0.22	0.507	0.000191356	GBM.new	SEC14L1	-0.287	FN1-TREM2-RETN-VSIG4-Mphage-like4
C19orf38	2.17861e-19	0.628095	0.536	0.183	2.73219e-15	GBM.PD1	C19orf38	0.353	FN1-TREM2-RETN-VSIG4-Mphage-like4
HLA-DRA	1.04527e-22	0.625922	0.979	0.833	1.31087e-18	GBM.PD1	HLA-DRA	0.146	FN1-TREM2-RETN-VSIG4-Mphage-like4
GBP2	1.52983e-35	0.624037	0.771	0.253	1.91856e-31	GBM.PD1	GBP2	0.518	FN1-TREM2-RETN-VSIG4-Mphage-like4
C1QC	2.0537e-05	0.718795	0.652	0.49	0.257554	GBM.rec	C1QC	0.162	GPNMB-ANGPTL4-CXCL8-Mphage-like2
IGFLR1	6.33141e-25	0.615841	0.448	0.063	7.94022e-21	GBM.PD1	IGFLR1	0.385	FN1-TREM2-RETN-VSIG4-Mphage-like4
SLC1A3	1.46414e-05	0.717923	0.263	0.516	0.183618	GBM.new	SLC1A3	-0.253	FN1-TREM2-RETN-VSIG4-Mphage-like4
CLEC4E	1.02897e-23	0.61328	0.677	0.223	1.29043e-19	GBM.PD1	CLEC4E	0.454	FN1-TREM2-RETN-VSIG4-Mphage-like4
TOMM20	0.000344104	0.717169	0.288	0.092	1	GBM.rec	TOMM20	0.196	LowRead
SMIM25	1.11101e-10	0.613112	0.693	0.418	1.39332e-06	GBM.rec	SMIM25	0.275	FN1-TREM2-RETN-VSIG4-Mphage-like4
C1QA	0.0034411	0.717095	0.658	0.632	1	GBM.rec	C1QA	0.026	FN1-TREM2-RETN-VSIG4-Mphage-like4
LIMD2	3.14004e-26	0.609883	0.734	0.267	3.93792e-22	GBM.PD1	LIMD2	0.467	FN1-TREM2-RETN-VSIG4-Mphage-like4
PTPRC	1.16354e-05	0.714188	0.81	0.684	0.14592	GBM.PD1	PTPRC	0.126	CCL3-4-IL1B-MRC1-Mphage-like1
FTH1	0.00617517	0.713908	0.986	1	1	GBM.rec	FTH1	-0.014	LowRead
PHC2	1.33137e-06	0.605319	0.684	0.479	0.0166968	GBM.rec	PHC2	0.205	FN1-TREM2-RETN-VSIG4-Mphage-like4
IFI35	1.14352e-20	0.599371	0.625	0.237	1.43409e-16	GBM.PD1	IFI35	0.388	FN1-TREM2-RETN-VSIG4-Mphage-like4
GIMAP4	1.81344e-23	0.592967	0.682	0.25	2.27424e-19	GBM.PD1	GIMAP4	0.432	FN1-TREM2-RETN-VSIG4-Mphage-like4
SEPT7	0.00409753	0.709059	0.322	0.142	1	GBM.PD1	SEPT7	0.18	LowRead
PDE4B	1.37667e-06	0.591079	0.296	0.572	0.0172648	GBM.new	PDE4B	-0.276	FN1-TREM2-RETN-VSIG4-Mphage-like4
CASP4	3.6581e-23	0.587813	0.729	0.343	4.58762e-19	GBM.PD1	CASP4	0.386	FN1-TREM2-RETN-VSIG4-Mphage-like4
CYBA	3.34882e-05	0.708388	0.803	0.697	0.419976	GBM.new	CYBA	0.106	LowRead
NDRG1	0.00182728	0.708243	0.494	0.355	1	GBM.new	NDRG1	0.139	CCL3-4-IL1B-MRC1-Mphage-like1
NCF1	8.29e-25	0.586268	0.75	0.3	1.03965e-20	GBM.PD1	NCF1	0.45	FN1-TREM2-RETN-VSIG4-Mphage-like4
CXCL9	7.40813e-15	1.80137	0.254	0.004	9.29053e-11	GBM.PD1	CXCL9	0.25	GPNMB-ANGPTL4-CXCL8-Mphage-like2
IFITM3	3.34084e-15	1.77571	0.746	0.496	4.18975e-11	GBM.PD1	IFITM3	0.25	GPNMB-ANGPTL4-CXCL8-Mphage-like2
CXCL5	5.31686e-14	1.7167	0.37	0.059	6.66787e-10	GBM.new	CXCL5	0.311	GPNMB-ANGPTL4-CXCL8-Mphage-like2
SLC2A3	8.15404e-06	0.705554	0.659	0.468	0.10226	GBM.rec	SLC2A3	0.191	LILRB2-CD48-ITGAL-Mono2
IFITM1	1.12259e-24	1.66312	0.467	0.03	1.40784e-20	GBM.PD1	IFITM1	0.437	GPNMB-ANGPTL4-CXCL8-Mphage-like2
TFRC	0.000362081	0.705091	0.617	0.507	1	GBM.rec	TFRC	0.11	FN1-TREM2-IL10-Mphage-like3
CXCL8	3.80638e-18	1.61819	0.908	0.637	4.77358e-14	GBM.new	CXCL8	0.271	GPNMB-ANGPTL4-CXCL8-Mphage-like2
VAMP5	3.16763e-28	1.59841	0.68	0.158	3.97252e-24	GBM.PD1	VAMP5	0.522	GPNMB-ANGPTL4-CXCL8-Mphage-like2
IVNS1ABP	0.00054598	0.702779	0.681	0.662	1	GBM.new	IVNS1ABP	0.019	GPNMB-ANGPTL4-CXCL8-Mphage-like2
HLA-DPA1	0.000151964	0.701926	0.678	0.403	1	GBM.PD1	HLA-DPA1	0.275	LowRead
SERPINB2	7.67268e-13	1.58428	0.303	0.038	9.62231e-09	GBM.new	SERPINB2	0.265	GPNMB-ANGPTL4-CXCL8-Mphage-like2
RETN	4.25124e-10	1.56059	0.583	0.303	5.33148e-06	GBM.rec	RETN	0.28	GPNMB-ANGPTL4-CXCL8-Mphage-like2
SEC61G	0.00778021	0.698664	0.649	0.695	1	GBM.new	SEC61G	-0.046	CCL3-4-IL1B-MRC1-Mphage-like1
PFKFB3	0.0033809	0.697873	0.316	0.542	1	GBM.new	PFKFB3	-0.226	LILRB2-CD48-ITGAL-Mono2
HMOX1	0.00963079	0.697114	0.414	0.716	1	GBM.new	HMOX1	-0.302	FN1-TREM2-RETN-VSIG4-Mphage-like4
WTAP	0.000164344	0.696978	0.296	0.539	1	GBM.new	WTAP	-0.243	FN1-TREM2-RETN-VSIG4-Mphage-like4
NME1	0.00161037	0.696946	0.442	0.329	1	GBM.new	NME1	0.113	FN1-TREM2-IL10-Mphage-like3
ERO1A	0.0010282	0.696933	0.4	0.269	1	GBM.new	ERO1A	0.131	FN1-TREM2-IL10-Mphage-like3
GBP1	4.37521e-16	1.54989	0.451	0.103	5.48695e-12	GBM.PD1	GBP1	0.348	GPNMB-ANGPTL4-CXCL8-Mphage-like2
CXCL1	1.11084e-08	1.38165	0.345	0.105	0.00013931	GBM.new	CXCL1	0.24	GPNMB-ANGPTL4-CXCL8-Mphage-like2
YPEL3	0.000699702	0.695172	0.301	0.108	1	GBM.rec	YPEL3	0.193	LowRead
CFD	6.09145e-10	1.37756	0.67	0.469	7.63929e-06	GBM.rec	CFD	0.201	GPNMB-ANGPTL4-CXCL8-Mphage-like2
PSMB8	0.00250625	0.693971	0.305	0.119	1	GBM.PD1	PSMB8	0.186	LowRead
GSTK1	0.00485102	0.693274	0.356	0.164	1	GBM.PD1	GSTK1	0.192	LowRead
PSME2	3.58637e-18	1.32236	0.77	0.444	4.49767e-14	GBM.PD1	PSME2	0.326	GPNMB-ANGPTL4-CXCL8-Mphage-like2
CALHM6	4.01042e-17	1.29642	0.615	0.214	5.02947e-13	GBM.PD1	CALHM6	0.401	GPNMB-ANGPTL4-CXCL8-Mphage-like2
CXCL3	1.90682e-14	1.24977	0.756	0.422	2.39135e-10	GBM.new	CXCL3	0.334	GPNMB-ANGPTL4-CXCL8-Mphage-like2
JAML	4.49521e-05	0.690337	0.58	0.406	0.563744	GBM.rec	JAML	0.174	FN1-TREM2-IL10-Mphage-like3
GABARAP	1.17514e-12	1.24856	0.746	0.444	1.47374e-08	GBM.PD1	GABARAP	0.302	GPNMB-ANGPTL4-CXCL8-Mphage-like2
TMEM176B	0.00485374	0.688196	0.288	0.119	1	GBM.PD1	TMEM176B	0.169	LowRead
CLEC5A	0.00814657	0.686699	0.403	0.285	1	GBM.new	CLEC5A	0.118	CCL3-4-IL1B-MRC1-Mphage-like1
PLIN2	1.49209e-13	1.23699	0.849	0.823	1.87123e-09	GBM.new	PLIN2	0.026	GPNMB-ANGPTL4-CXCL8-Mphage-like2
PSMB9	1.00139e-16	1.23457	0.656	0.312	1.25584e-12	GBM.PD1	PSMB9	0.344	GPNMB-ANGPTL4-CXCL8-Mphage-like2
ERO1A	1.09598e-10	1.16534	0.655	0.477	1.37447e-06	GBM.new	ERO1A	0.178	GPNMB-ANGPTL4-CXCL8-Mphage-like2
IRAK1	0.000129151	0.684035	0.563	0.426	1	GBM.new	IRAK1	0.137	GPNMB-ANGPTL4-CXCL8-Mphage-like2
VEGFA	1.13571e-05	0.683504	0.765	0.641	0.14243	GBM.new	VEGFA	0.124	GPNMB-ANGPTL4-CXCL8-Mphage-like2
SERPING1	1.0972e-22	1.16458	0.598	0.132	1.376e-18	GBM.PD1	SERPING1	0.466	GPNMB-ANGPTL4-CXCL8-Mphage-like2
DDX60L	0.000183156	0.681225	0.479	0.329	1	GBM.new	DDX60L	0.15	GPNMB-ANGPTL4-CXCL8-Mphage-like2
IL1R2	0.00384768	0.680988	0.57	0.418	1	GBM.rec	IL1R2	0.152	CCL3-4-IL1B-MRC1-Mphage-like1
CCL20	7.53941e-10	1.15723	0.681	0.43	9.45517e-06	GBM.new	CCL20	0.251	GPNMB-ANGPTL4-CXCL8-Mphage-like2
H1FX	4.27234e-05	0.679867	0.508	0.309	0.535794	GBM.rec	H1FX	0.199	LILRB2-CD48-ITGAL-Mono2
CD74	1.02226e-17	1.14899	0.992	0.902	1.28202e-13	GBM.PD1	CD74	0.09	GPNMB-ANGPTL4-CXCL8-Mphage-like2
STAT1	9.22156e-18	1.14446	0.639	0.252	1.15648e-13	GBM.PD1	STAT1	0.387	GPNMB-ANGPTL4-CXCL8-Mphage-like2
NME2	8.52811e-11	1.14169	0.467	0.179	1.06951e-06	GBM.PD1	NME2	0.288	GPNMB-ANGPTL4-CXCL8-Mphage-like2
CCL3L1	0.000192222	0.677727	0.4	0.229	1	GBM.new	CCL3L1	0.171	FN1-TREM2-IL10-Mphage-like3
FCGR1A	8.42584e-19	1.14142	0.705	0.325	1.05668e-14	GBM.PD1	FCGR1A	0.38	GPNMB-ANGPTL4-CXCL8-Mphage-like2
CRIP1	0.00212469	0.675877	0.356	0.253	1	GBM.PD1	CRIP1	0.103	FCN1-SELL-S100A8-9-Mono1
CXCL2	3.95092e-10	1.13902	0.731	0.515	4.95485e-06	GBM.new	CXCL2	0.216	GPNMB-ANGPTL4-CXCL8-Mphage-like2
UBE2L6	5.41893e-21	1.12703	0.639	0.209	6.79587e-17	GBM.PD1	UBE2L6	0.43	GPNMB-ANGPTL4-CXCL8-Mphage-like2
CST3	1.12533e-15	1.119	0.967	0.816	1.41127e-11	GBM.PD1	CST3	0.151	GPNMB-ANGPTL4-CXCL8-Mphage-like2
IFI6	1.10433e-14	1.10097	0.656	0.295	1.38494e-10	GBM.PD1	IFI6	0.361	GPNMB-ANGPTL4-CXCL8-Mphage-like2
LY6E	3.04218e-16	1.09296	0.672	0.291	3.81519e-12	GBM.PD1	LY6E	0.381	GPNMB-ANGPTL4-CXCL8-Mphage-like2
RARRES3	3.13509e-16	1.08747	0.508	0.141	3.93172e-12	GBM.PD1	RARRES3	0.367	GPNMB-ANGPTL4-CXCL8-Mphage-like2
MAPK6	8.83522e-05	0.671762	0.462	0.3	1	GBM.new	MAPK6	0.162	GPNMB-ANGPTL4-CXCL8-Mphage-like2
RHOB	0.000107423	0.670941	0.68	0.475	1	GBM.PD1	RHOB	0.205	CCL3-4-IL1B-MRC1-Mphage-like1
SERPINA1	2.94433e-11	1.08718	0.828	0.645	3.69248e-07	GBM.PD1	SERPINA1	0.183	GPNMB-ANGPTL4-CXCL8-Mphage-like2
APOE	0.0031837	0.668706	0.658	0.662	1	GBM.new	APOE	-0.004	LILRB2-CD48-ITGAL-Mono2
RNASEK	1.43527e-13	1.07622	0.582	0.239	1.79998e-09	GBM.PD1	RNASEK	0.343	GPNMB-ANGPTL4-CXCL8-Mphage-like2
IRF1	2.88477e-14	1.04707	0.689	0.329	3.61779e-10	GBM.PD1	IRF1	0.36	GPNMB-ANGPTL4-CXCL8-Mphage-like2
MRC1	4.23896e-11	1.04428	0.617	0.311	5.31608e-07	GBM.rec	MRC1	0.306	GPNMB-ANGPTL4-CXCL8-Mphage-like2
XIST	7.75108e-12	1.03728	0.445	0.135	9.72063e-08	GBM.new	XIST	0.31	GPNMB-ANGPTL4-CXCL8-Mphage-like2
MIF	0.000731783	0.666647	0.535	0.437	1	GBM.new	MIF	0.098	FCN1-SELL-S100A8-9-Mono1
HLA-DRB5	0.00142603	0.666387	0.609	0.613	1	GBM.PD1	HLA-DRB5	-0.004	FN1-TREM2-RETN-VSIG4-Mphage-like4
GBP5	1.89746e-12	0.989958	0.443	0.132	2.3796e-08	GBM.PD1	GBP5	0.311	GPNMB-ANGPTL4-CXCL8-Mphage-like2
ISG20	7.40219e-13	0.976026	0.475	0.154	9.28309e-09	GBM.PD1	ISG20	0.321	GPNMB-ANGPTL4-CXCL8-Mphage-like2
HLA-DPB1	4.082e-18	0.975929	0.934	0.722	5.11923e-14	GBM.PD1	HLA-DPB1	0.212	GPNMB-ANGPTL4-CXCL8-Mphage-like2
HLA-DQA1	2.49509e-18	0.971971	0.861	0.449	3.1291e-14	GBM.PD1	HLA-DQA1	0.412	GPNMB-ANGPTL4-CXCL8-Mphage-like2
AREG	3.16647e-08	0.971174	0.721	0.581	0.000397107	GBM.PD1	AREG	0.14	GPNMB-ANGPTL4-CXCL8-Mphage-like2
ARHGDIA	0.000587593	0.663034	0.37	0.15	1	GBM.rec	ARHGDIA	0.22	LowRead
NDRG1	2.19035e-06	0.949302	0.63	0.485	0.0274692	GBM.new	NDRG1	0.145	GPNMB-ANGPTL4-CXCL8-Mphage-like2
PTGS2	7.65594e-07	0.941789	0.471	0.245	0.00960131	GBM.new	PTGS2	0.226	GPNMB-ANGPTL4-CXCL8-Mphage-like2
EHD1	0.0045914	0.662456	0.479	0.363	1	GBM.new	EHD1	0.116	GPNMB-ANGPTL4-CXCL8-Mphage-like2
HSP90AA1	5.82612e-05	0.661975	0.935	0.895	0.730654	GBM.new	HSP90AA1	0.04	CCL3-4-IL1B-MRC1-Mphage-like1
VCAN	4.71927e-06	0.661493	0.8	0.779	0.0591843	GBM.new	VCAN	0.021	FN1-TREM2-IL10-Mphage-like3
HLA-DPA1	5.42997e-20	0.940698	0.959	0.697	6.80972e-16	GBM.PD1	HLA-DPA1	0.262	GPNMB-ANGPTL4-CXCL8-Mphage-like2
PET100	6.02322e-05	0.659081	0.633	0.582	0.755372	GBM.new	PET100	0.051	FN1-TREM2-IL10-Mphage-like3
HLA-DQB1	1.23951e-19	0.930248	0.918	0.543	1.55447e-15	GBM.PD1	HLA-DQB1	0.375	GPNMB-ANGPTL4-CXCL8-Mphage-like2
LAP3	4.07023e-15	0.929815	0.705	0.359	5.10448e-11	GBM.PD1	LAP3	0.346	GPNMB-ANGPTL4-CXCL8-Mphage-like2
METRNL	0.00203182	0.658468	0.312	0.556	1	GBM.new	METRNL	-0.244	FN1-TREM2-RETN-VSIG4-Mphage-like4
ANGPTL4	4.23039e-09	0.920674	0.588	0.312	5.30533e-05	GBM.new	ANGPTL4	0.276	GPNMB-ANGPTL4-CXCL8-Mphage-like2
EPSTI1	6.14661e-18	0.918709	0.623	0.205	7.70847e-14	GBM.PD1	EPSTI1	0.418	GPNMB-ANGPTL4-CXCL8-Mphage-like2
TMEM158	3.19816e-12	0.907332	0.345	0.068	4.01081e-08	GBM.new	TMEM158	0.277	GPNMB-ANGPTL4-CXCL8-Mphage-like2
IL32	4.89881e-09	0.906573	0.262	0.051	6.1436e-05	GBM.PD1	IL32	0.211	GPNMB-ANGPTL4-CXCL8-Mphage-like2
IFITM2	4.14996e-11	0.90333	0.713	0.479	5.20446e-07	GBM.PD1	IFITM2	0.234	GPNMB-ANGPTL4-CXCL8-Mphage-like2
IL2RA	4.09088e-12	0.894738	0.339	0.066	5.13037e-08	GBM.rec	IL2RA	0.273	GPNMB-ANGPTL4-CXCL8-Mphage-like2
PSMB10	3.42097e-11	0.878663	0.549	0.244	4.29024e-07	GBM.PD1	PSMB10	0.305	GPNMB-ANGPTL4-CXCL8-Mphage-like2
RALGDS	0.00909373	0.653548	0.42	0.316	1	GBM.new	RALGDS	0.104	GPNMB-ANGPTL4-CXCL8-Mphage-like2
CTSL	7.53751e-08	0.868201	0.782	0.7	0.00094528	GBM.new	CTSL	0.082	GPNMB-ANGPTL4-CXCL8-Mphage-like2
HLA-DRB1	8.7368e-20	0.86563	0.992	0.739	1.09568e-15	GBM.PD1	HLA-DRB1	0.253	GPNMB-ANGPTL4-CXCL8-Mphage-like2
NAMPT	4.40181e-13	0.84966	0.933	0.886	5.52032e-09	GBM.new	NAMPT	0.047	GPNMB-ANGPTL4-CXCL8-Mphage-like2
NR4A1	0.00525811	0.649696	0.468	0.739	1	GBM.new	NR4A1	-0.271	FN1-TREM2-RETN-VSIG4-Mphage-like4
EEF1G	4.29857e-15	0.847041	0.434	0.077	5.39084e-11	GBM.PD1	EEF1G	0.357	GPNMB-ANGPTL4-CXCL8-Mphage-like2
LGALS9	0.000334137	0.648442	0.435	0.745	1	GBM.new	LGALS9	-0.31	FN1-TREM2-RETN-VSIG4-Mphage-like4
LRPAP1	3.82974e-05	0.647824	0.66	0.537	0.480288	GBM.rec	LRPAP1	0.123	CCL3-4-IL1B-MRC1-Mphage-like1
JAML	1.01172e-06	0.836982	0.487	0.249	0.012688	GBM.rec	JAML	0.238	GPNMB-ANGPTL4-CXCL8-Mphage-like2
BCL2A1	0.0016209	0.646742	0.75	0.795	1	GBM.new	BCL2A1	-0.045	FN1-TREM2-IL10-Mphage-like3
ACIN1	0.00591171	0.646532	0.197	0.352	1	GBM.new	ACIN1	-0.155	LILRB2-CD48-ITGAL-Mono2
GGA2	0.00197638	0.646388	0.145	0.299	1	GBM.new	GGA2	-0.154	LILRB2-CD48-ITGAL-Mono2
IL1RN	4.48656e-07	0.835194	0.605	0.38	0.0056266	GBM.new	IL1RN	0.225	GPNMB-ANGPTL4-CXCL8-Mphage-like2
YBX1	0.000401182	0.645831	0.521	0.275	1	GBM.rec	YBX1	0.246	LowRead
ZBTB16	2.51736e-20	0.820978	0.5	0.077	3.15703e-16	GBM.PD1	ZBTB16	0.423	GPNMB-ANGPTL4-CXCL8-Mphage-like2
LGALS3BP	5.98608e-12	0.812202	0.484	0.179	7.50714e-08	GBM.PD1	LGALS3BP	0.305	GPNMB-ANGPTL4-CXCL8-Mphage-like2
VCAN	9.39455e-06	0.645089	0.739	0.696	0.117817	GBM.new	VCAN	0.043	GPNMB-ANGPTL4-CXCL8-Mphage-like2
C1orf162	5.08052e-11	0.80234	0.844	0.628	6.37148e-07	GBM.PD1	C1orf162	0.216	GPNMB-ANGPTL4-CXCL8-Mphage-like2
CSTB	4.24384e-06	0.643871	0.815	0.857	0.053222	GBM.new	CSTB	-0.042	GPNMB-ANGPTL4-CXCL8-Mphage-like2
ATF4	5.88115e-05	0.643162	0.706	0.591	0.737555	GBM.new	ATF4	0.115	GPNMB-ANGPTL4-CXCL8-Mphage-like2
TAP1	6.17958e-13	0.785826	0.475	0.15	7.74981e-09	GBM.PD1	TAP1	0.325	GPNMB-ANGPTL4-CXCL8-Mphage-like2
GBP4	1.29868e-12	0.782494	0.369	0.081	1.62868e-08	GBM.PD1	GBP4	0.288	GPNMB-ANGPTL4-CXCL8-Mphage-like2
CHST15	0.00408514	0.640382	0.429	0.333	1	GBM.new	CHST15	0.096	GPNMB-ANGPTL4-CXCL8-Mphage-like2
FOLR2	6.99039e-11	0.773058	0.435	0.133	8.76665e-07	GBM.rec	FOLR2	0.302	GPNMB-ANGPTL4-CXCL8-Mphage-like2
PPA1	5.42176e-07	0.772317	0.508	0.299	0.00679943	GBM.PD1	PPA1	0.209	GPNMB-ANGPTL4-CXCL8-Mphage-like2
SLC11A2	0.00205343	0.639765	0.387	0.257	1	GBM.new	SLC11A2	0.13	GPNMB-ANGPTL4-CXCL8-Mphage-like2
SLC2A1	3.41997e-05	0.639375	0.269	0.11	0.428899	GBM.new	SLC2A1	0.159	GPNMB-ANGPTL4-CXCL8-Mphage-like2
G0S2	1.25608e-09	0.752381	0.807	0.561	1.57525e-05	GBM.new	G0S2	0.246	GPNMB-ANGPTL4-CXCL8-Mphage-like2
GBP4	2.63489e-05	0.63718	0.401	0.233	0.330441	GBM.PD1	GBP4	0.168	LILRB2-CD48-ITGAL-Mono2
SLC16A10	2.63994e-06	0.75159	0.605	0.405	0.0331075	GBM.new	SLC16A10	0.2	GPNMB-ANGPTL4-CXCL8-Mphage-like2
IL1B	1.07667e-07	0.7407	0.824	0.633	0.00135025	GBM.new	IL1B	0.191	GPNMB-ANGPTL4-CXCL8-Mphage-like2
IFIT2	0.000385068	0.635526	0.303	0.153	1	GBM.PD1	IFIT2	0.15	LILRB2-CD48-ITGAL-Mono2
TNFSF13	2.6776e-09	0.739132	0.32	0.081	3.35798e-05	GBM.PD1	TNFSF13	0.239	GPNMB-ANGPTL4-CXCL8-Mphage-like2
ISG15	1.60908e-10	0.73866	0.59	0.282	2.01794e-06	GBM.PD1	ISG15	0.308	GPNMB-ANGPTL4-CXCL8-Mphage-like2
SERPINE1	0.000664668	0.633931	0.269	0.127	1	GBM.new	SERPINE1	0.142	GPNMB-ANGPTL4-CXCL8-Mphage-like2
SDC2	4.27987e-08	0.737494	0.513	0.27	0.000536739	GBM.new	SDC2	0.243	GPNMB-ANGPTL4-CXCL8-Mphage-like2
GBP2	1.28674e-13	0.727757	0.648	0.295	1.6137e-09	GBM.PD1	GBP2	0.353	GPNMB-ANGPTL4-CXCL8-Mphage-like2
CLEC4E	2.6678e-11	0.721118	0.59	0.269	3.34569e-07	GBM.PD1	CLEC4E	0.321	GPNMB-ANGPTL4-CXCL8-Mphage-like2
NR4A3	3.35004e-05	0.632725	0.274	0.523	0.420129	GBM.new	NR4A3	-0.249	FN1-TREM2-RETN-VSIG4-Mphage-like4
ENO2	5.18011e-08	0.719745	0.311	0.084	0.000649638	GBM.new	ENO2	0.227	GPNMB-ANGPTL4-CXCL8-Mphage-like2
CD37	1.93306e-09	0.7196	0.779	0.577	2.42425e-05	GBM.PD1	CD37	0.202	GPNMB-ANGPTL4-CXCL8-Mphage-like2
LYAR	1.5129e-06	0.708403	0.391	0.191	0.0189733	GBM.rec	LYAR	0.2	GPNMB-ANGPTL4-CXCL8-Mphage-like2
MX1	2.03811e-12	0.707663	0.434	0.124	2.556e-08	GBM.PD1	MX1	0.31	GPNMB-ANGPTL4-CXCL8-Mphage-like2
IFIT3	4.72009e-11	0.705182	0.303	0.056	5.91946e-07	GBM.PD1	IFIT3	0.247	GPNMB-ANGPTL4-CXCL8-Mphage-like2
JPT1	6.79584e-11	0.696295	0.762	0.427	8.52267e-07	GBM.PD1	JPT1	0.335	GPNMB-ANGPTL4-CXCL8-Mphage-like2
CCL3	0.00205694	0.628149	0.624	0.539	1	GBM.new	CCL3	0.085	LILRB2-CD48-ITGAL-Mono2
TNFSF13B	1.04264e-13	0.686247	0.656	0.312	1.30757e-09	GBM.PD1	TNFSF13B	0.344	GPNMB-ANGPTL4-CXCL8-Mphage-like2
APOBEC3A	0.00440702	0.627972	0.492	0.368	1	GBM.rec	APOBEC3A	0.124	LILRB2-CD48-ITGAL-Mono2
ENO1	1.52477e-07	0.68297	0.84	0.882	0.00191222	GBM.new	ENO1	-0.042	GPNMB-ANGPTL4-CXCL8-Mphage-like2
CCDC71L	0.00110981	0.625979	0.353	0.219	1	GBM.new	CCDC71L	0.134	GPNMB-ANGPTL4-CXCL8-Mphage-like2
ARF5	1.21409e-07	0.679684	0.59	0.359	0.00152259	GBM.PD1	ARF5	0.231	GPNMB-ANGPTL4-CXCL8-Mphage-like2
MIS18BP1	0.000125315	0.624773	0.49	0.288	1	GBM.PD1	MIS18BP1	0.202	CCL3-4-IL1B-MRC1-Mphage-like1
MARCKS	0.00218802	0.62431	0.328	0.572	1	GBM.new	MARCKS	-0.244	FN1-TREM2-RETN-VSIG4-Mphage-like4
TRAPPC5	1.5372e-10	0.677142	0.32	0.068	1.9278e-06	GBM.PD1	TRAPPC5	0.252	GPNMB-ANGPTL4-CXCL8-Mphage-like2
ADA2	7.12566e-12	0.673892	0.59	0.295	8.93629e-08	GBM.PD1	ADA2	0.295	GPNMB-ANGPTL4-CXCL8-Mphage-like2
ACTB	1.29772e-11	0.673767	0.967	0.932	1.62747e-07	GBM.PD1	ACTB	0.035	GPNMB-ANGPTL4-CXCL8-Mphage-like2
MICAL1	0.00721555	0.622983	0.168	0.312	1	GBM.new	MICAL1	-0.144	GPNMB-ANGPTL4-CXCL8-Mphage-like2
MS4A6A	2.16815e-09	0.673666	0.787	0.513	2.71907e-05	GBM.PD1	MS4A6A	0.274	GPNMB-ANGPTL4-CXCL8-Mphage-like2
LIMD2	4.93373e-10	0.670266	0.434	0.167	6.18739e-06	GBM.PD1	LIMD2	0.267	GPNMB-ANGPTL4-CXCL8-Mphage-like2
TFPI	1.12425e-07	0.668162	0.336	0.122	0.00140992	GBM.new	TFPI	0.214	GPNMB-ANGPTL4-CXCL8-Mphage-like2
FXYD5	0.00728185	0.621805	0.466	0.275	1	GBM.rec	FXYD5	0.191	LowRead
CCL4L2	0.000342676	0.621112	0.425	0.249	1	GBM.new	CCL4L2	0.176	FN1-TREM2-IL10-Mphage-like3
CYP27A1	0.00011811	0.620846	0.417	0.241	1	GBM.rec	CYP27A1	0.176	GPNMB-ANGPTL4-CXCL8-Mphage-like2
RGS10	9.14897e-13	0.666273	0.836	0.556	1.14737e-08	GBM.PD1	RGS10	0.28	GPNMB-ANGPTL4-CXCL8-Mphage-like2
CHCHD10	2.74108e-07	0.665844	0.705	0.479	0.00343759	GBM.PD1	CHCHD10	0.226	GPNMB-ANGPTL4-CXCL8-Mphage-like2
FYB1	5.63343e-11	0.663672	0.754	0.556	7.06488e-07	GBM.PD1	FYB1	0.198	GPNMB-ANGPTL4-CXCL8-Mphage-like2
NFKBIZ	0.00845079	0.617578	0.588	0.544	1	GBM.new	NFKBIZ	0.044	GPNMB-ANGPTL4-CXCL8-Mphage-like2
PHLDA1	1.11121e-06	0.658547	0.639	0.43	0.0139356	GBM.new	PHLDA1	0.209	GPNMB-ANGPTL4-CXCL8-Mphage-like2
SPI1	0.000685922	0.617332	0.562	0.3	1	GBM.rec	SPI1	0.262	LowRead
TNFSF10	1.5026e-11	0.657479	0.377	0.098	1.88441e-07	GBM.PD1	TNFSF10	0.279	GPNMB-ANGPTL4-CXCL8-Mphage-like2
MCEMP1	1.97796e-05	0.616945	0.496	0.299	0.248056	GBM.rec	MCEMP1	0.197	GPNMB-ANGPTL4-CXCL8-Mphage-like2
POLD4	3.12626e-09	0.65539	0.475	0.201	3.92064e-05	GBM.PD1	POLD4	0.274	GPNMB-ANGPTL4-CXCL8-Mphage-like2
CD48	3.63736e-09	0.654214	0.574	0.282	4.56161e-05	GBM.PD1	CD48	0.292	GPNMB-ANGPTL4-CXCL8-Mphage-like2
CORO1A	3.94998e-14	0.651109	0.762	0.419	4.95367e-10	GBM.PD1	CORO1A	0.343	GPNMB-ANGPTL4-CXCL8-Mphage-like2
ZYX	4.70325e-07	0.644026	0.705	0.517	0.00589835	GBM.PD1	ZYX	0.188	GPNMB-ANGPTL4-CXCL8-Mphage-like2
HLA-DMA	1.0669e-11	0.639814	0.828	0.509	1.33799e-07	GBM.PD1	HLA-DMA	0.319	GPNMB-ANGPTL4-CXCL8-Mphage-like2
SDCBP	2.24424e-06	0.635886	0.807	0.789	0.028145	GBM.new	SDCBP	0.018	GPNMB-ANGPTL4-CXCL8-Mphage-like2
CANX	0.00573009	0.614706	0.622	0.671	1	GBM.new	CANX	-0.049	GPNMB-ANGPTL4-CXCL8-Mphage-like2
MAN2B1	7.32247e-09	0.633349	0.344	0.107	9.18311e-05	GBM.PD1	MAN2B1	0.237	GPNMB-ANGPTL4-CXCL8-Mphage-like2
ABHD5	4.43328e-05	0.613494	0.568	0.323	0.555977	GBM.rec	ABHD5	0.245	FN1-TREM2-IL10-Mphage-like3
FCGR1B	3.62197e-13	0.623011	0.402	0.094	4.54231e-09	GBM.PD1	FCGR1B	0.308	GPNMB-ANGPTL4-CXCL8-Mphage-like2
NUS1	4.33361e-05	0.613206	0.462	0.274	0.543477	GBM.new	NUS1	0.188	GPNMB-ANGPTL4-CXCL8-Mphage-like2
ARPC1B	6.17389e-10	0.620673	0.869	0.679	7.74267e-06	GBM.PD1	ARPC1B	0.19	GPNMB-ANGPTL4-CXCL8-Mphage-like2
TGFBI	0.00214194	0.612948	0.419	0.807	1	GBM.new	TGFBI	-0.388	FN1-TREM2-RETN-VSIG4-Mphage-like4
GIMAP4	4.30465e-07	0.619944	0.393	0.171	0.00539846	GBM.PD1	GIMAP4	0.222	GPNMB-ANGPTL4-CXCL8-Mphage-like2
VSIR	2.0742e-12	0.61697	0.787	0.436	2.60125e-08	GBM.PD1	VSIR	0.351	GPNMB-ANGPTL4-CXCL8-Mphage-like2
KCNMA1	1.77055e-10	0.616558	0.484	0.175	2.22044e-06	GBM.PD1	KCNMA1	0.309	GPNMB-ANGPTL4-CXCL8-Mphage-like2
CXCR4	4.37497e-11	0.616389	0.828	0.556	5.48665e-07	GBM.PD1	CXCR4	0.272	GPNMB-ANGPTL4-CXCL8-Mphage-like2
HIGD2A	1.47788e-09	0.614942	0.836	0.577	1.8534e-05	GBM.PD1	HIGD2A	0.259	GPNMB-ANGPTL4-CXCL8-Mphage-like2
ITGAX	0.00310164	0.607689	0.593	0.514	1	GBM.rec	ITGAX	0.079	FN1-TREM2-IL10-Mphage-like3
XIST	0.00114249	0.607289	0.311	0.171	1	GBM.rec	XIST	0.14	LILRB2-CD48-ITGAL-Mono2
IFI27	4.28841e-10	0.613851	0.27	0.043	5.37809e-06	GBM.PD1	IFI27	0.227	GPNMB-ANGPTL4-CXCL8-Mphage-like2
TMEM179B	1.27524e-08	0.609426	0.549	0.299	0.000159928	GBM.PD1	TMEM179B	0.25	GPNMB-ANGPTL4-CXCL8-Mphage-like2
GLIPR1	0.00942619	0.605254	0.322	0.157	1	GBM.PD1	GLIPR1	0.165	LowRead
FGL2	1.28049e-11	0.60396	0.672	0.359	1.60586e-07	GBM.PD1	FGL2	0.313	GPNMB-ANGPTL4-CXCL8-Mphage-like2
ELL2	0.00265678	0.603695	0.773	0.717	1	GBM.new	ELL2	0.056	GPNMB-ANGPTL4-CXCL8-Mphage-like2
LILRB1	6.71428e-05	0.603592	0.583	0.394	0.842038	GBM.rec	LILRB1	0.189	LILRB2-CD48-ITGAL-Mono2
FXYD5	1.20406e-10	0.603457	0.877	0.714	1.51001e-06	GBM.PD1	FXYD5	0.163	GPNMB-ANGPTL4-CXCL8-Mphage-like2
NPL	0.000873188	0.603233	0.188	0.343	1	GBM.new	NPL	-0.155	FN1-TREM2-RETN-VSIG4-Mphage-like4
APOC1	0.00322464	0.60151	0.564	0.493	1	GBM.new	APOC1	0.071	LILRB2-CD48-ITGAL-Mono2
TMEM219	1.95314e-08	0.595245	0.705	0.466	0.000244943	GBM.PD1	TMEM219	0.239	GPNMB-ANGPTL4-CXCL8-Mphage-like2
ICAM3	1.98656e-07	0.59309	0.402	0.175	0.00249135	GBM.PD1	ICAM3	0.227	GPNMB-ANGPTL4-CXCL8-Mphage-like2
PSME1	1.13599e-11	0.592142	0.787	0.543	1.42465e-07	GBM.PD1	PSME1	0.244	GPNMB-ANGPTL4-CXCL8-Mphage-like2
PSMB8	5.99784e-07	0.591829	0.582	0.393	0.00752189	GBM.PD1	PSMB8	0.189	GPNMB-ANGPTL4-CXCL8-Mphage-like2
HLA-DRA	1.09334e-11	0.589097	0.992	0.889	1.37116e-07	GBM.PD1	HLA-DRA	0.103	GPNMB-ANGPTL4-CXCL8-Mphage-like2
WDR26	0.00733394	0.595422	0.504	0.371	1	GBM.new	WDR26	0.133	GPNMB-ANGPTL4-CXCL8-Mphage-like2
SPI1	6.20773e-11	0.587874	0.877	0.607	7.78511e-07	GBM.PD1	SPI1	0.27	GPNMB-ANGPTL4-CXCL8-Mphage-like2
EIF4A2	0.00870168	0.594978	0.271	0.119	1	GBM.PD1	EIF4A2	0.152	LowRead
AQP9	1.90793e-06	0.587615	0.63	0.481	0.0239274	GBM.new	AQP9	0.149	GPNMB-ANGPTL4-CXCL8-Mphage-like2
SAMD9L	2.06326e-09	0.585404	0.311	0.073	2.58754e-05	GBM.PD1	SAMD9L	0.238	GPNMB-ANGPTL4-CXCL8-Mphage-like2
SPP1	1.31844e-16	1.86716	0.855	0.683	1.65346e-12	GBM.new	SPP1	0.172	LILRB2-CD48-ITGAL-Mono2
NAMPT	0.000917159	0.59287	0.658	0.458	1	GBM.rec	NAMPT	0.2	LowRead
G0S2	2.27652e-07	1.60814	0.573	0.387	0.00285499	GBM.new	G0S2	0.186	LILRB2-CD48-ITGAL-Mono2
HLA-DQA1	3.30683e-16	0.974531	0.809	0.498	4.1471e-12	GBM.PD1	HLA-DQA1	0.311	LILRB2-CD48-ITGAL-Mono2
GNB4	0.0012322	0.591229	0.205	0.405	1	GBM.new	GNB4	-0.2	LILRB2-CD48-ITGAL-Mono2
GBP5	1.58122e-10	0.844948	0.441	0.169	1.983e-06	GBM.PD1	GBP5	0.272	LILRB2-CD48-ITGAL-Mono2
JMJD1C	4.25265e-05	0.590753	0.73	0.548	0.533325	GBM.rec	JMJD1C	0.182	CCL3-4-IL1B-MRC1-Mphage-like1
CEBPB	0.00480623	0.589913	0.603	0.433	1	GBM.rec	CEBPB	0.17	LowRead
CXCR4	1.63238e-14	0.736683	0.882	0.582	2.04717e-10	GBM.PD1	CXCR4	0.3	LILRB2-CD48-ITGAL-Mono2
RARRES3	8.3255e-15	0.726908	0.658	0.309	1.0441e-10	GBM.PD1	RARRES3	0.349	LILRB2-CD48-ITGAL-Mono2
ANKH	0.000466807	0.588471	0.272	0.14	1	GBM.rec	ANKH	0.132	FN1-TREM2-RETN-VSIG4-Mphage-like4
VAMP5	9.19136e-13	0.666867	0.763	0.502	1.15269e-08	GBM.PD1	VAMP5	0.261	LILRB2-CD48-ITGAL-Mono2
ANKRD22	3.9684e-11	0.662722	0.362	0.104	4.97677e-07	GBM.PD1	ANKRD22	0.258	LILRB2-CD48-ITGAL-Mono2
LRPAP1	8.76604e-05	0.588105	0.691	0.622	1	GBM.rec	LRPAP1	0.069	FN1-TREM2-IL10-Mphage-like3
ZEB2	2.01096e-11	0.662668	0.841	0.572	2.52194e-07	GBM.rec	ZEB2	0.269	LILRB2-CD48-ITGAL-Mono2
HLA-DRB1	2.73682e-11	0.651829	0.967	0.823	3.43224e-07	GBM.PD1	HLA-DRB1	0.144	LILRB2-CD48-ITGAL-Mono2
CD74	4.56971e-08	0.641849	0.974	0.916	0.000573087	GBM.PD1	CD74	0.058	LILRB2-CD48-ITGAL-Mono2
UTRN	0.00430978	0.586624	0.271	0.104	1	GBM.PD1	UTRN	0.167	LowRead
ALDH2	0.0078231	0.586406	0.315	0.158	1	GBM.rec	ALDH2	0.157	LowRead
SERPING1	2.29703e-06	0.635126	0.316	0.133	0.0288071	GBM.PD1	SERPING1	0.183	LILRB2-CD48-ITGAL-Mono2
CALHM6	3.78981e-07	0.622847	0.671	0.462	0.0047528	GBM.PD1	CALHM6	0.209	LILRB2-CD48-ITGAL-Mono2
STAT1	3.99971e-07	0.609954	0.618	0.398	0.00501603	GBM.PD1	STAT1	0.22	LILRB2-CD48-ITGAL-Mono2
PNPLA8	8.01856e-08	0.598283	0.591	0.331	0.00100561	GBM.rec	PNPLA8	0.26	LILRB2-CD48-ITGAL-Mono2

## Sheet: IL10.p.val
	Type	rec.vs.PD1.wilcox.IL10
1	FCN1-SELL-S100A8-9-Mono1	0.825171
2	LILRB2-CD48-ITGAL-Mono2	0.886339
3	CCL3-4-IL1B-MRC1-Mphage-like1	0.0626062
4	GPNMB-ANGPTL4-CXCL8-Mphage-like2	0.0259345
5	FN1-TREM2-IL10-Mphage-like3	0.0105952
6	FN1-TREM2-RETN-VSIG4-Mphage-like4	0.517434
