# Supplementary material for: Neoadjuvant PD-1 blockade induces T cell and cDC1 activation but fails to overcome the immunosuppressive tumor associated macrophages in recurrent glioblastoma
Source: Research Square preprint supplement (doi:10.21203/rs.3.rs-793187/v1), 2021-08-13
Supplement: Supplementary file 9 [file SuppTable9-scRNAseq-DC.xlsx]

## Sheet: Markers
Gene	p_val	avg_logFC	pct.1	pct.2	p_val_adj	cluster	gene
LTB	2.90526e-65	1.403	0.51	0.133	3.73965e-61	cDC2-CD1C-CLEC10A-FCER1A	LTB
PPP1R14A	5.65948e-60	0.945492	0.436	0.106	7.28489e-56	cDC2-CD1C-CLEC10A-FCER1A	PPP1R14A
RAB11FIP1	7.24971e-44	0.67293	0.607	0.244	9.33182e-40	cDC2-CD1C-CLEC10A-FCER1A	RAB11FIP1
CD52	1.6382e-41	0.937307	0.581	0.238	2.10869e-37	cDC2-CD1C-CLEC10A-FCER1A	CD52
CFP	1.14173e-40	0.419144	0.379	0.103	1.46964e-36	cDC2-CD1C-CLEC10A-FCER1A	CFP
ACAP1	1.62174e-33	0.517709	0.547	0.232	2.0875e-29	cDC2-CD1C-CLEC10A-FCER1A	ACAP1
SLC38A1	5.50461e-33	0.423907	0.47	0.177	7.08553e-29	cDC2-CD1C-CLEC10A-FCER1A	SLC38A1
SMCO4	2.86292e-32	0.550649	0.621	0.31	3.68515e-28	cDC2-CD1C-CLEC10A-FCER1A	SMCO4
TMSB10	1.49693e-31	0.460789	0.977	0.932	1.92685e-27	cDC2-CD1C-CLEC10A-FCER1A	TMSB10
SEPT6	2.03456e-31	0.625808	0.738	0.467	2.61889e-27	cDC2-CD1C-CLEC10A-FCER1A	SEPT6
CD1C	2.8083e-29	0.954863	0.352	0.121	3.61485e-25	cDC2-CD1C-CLEC10A-FCER1A	CD1C
CNN2	3.90958e-29	0.447728	0.695	0.385	5.03241e-25	cDC2-CD1C-CLEC10A-FCER1A	CNN2
AFF3	6.62616e-28	0.333072	0.356	0.123	8.52919e-24	cDC2-CD1C-CLEC10A-FCER1A	AFF3
JAML	2.23525e-27	0.722209	0.628	0.377	2.87722e-23	cDC2-CD1C-CLEC10A-FCER1A	JAML
DUSP5	3.60514e-27	0.474242	0.51	0.231	4.64053e-23	cDC2-CD1C-CLEC10A-FCER1A	DUSP5
RIPOR2	1.81316e-26	0.458294	0.356	0.128	2.3339e-22	cDC2-CD1C-CLEC10A-FCER1A	RIPOR2
CRYBG1	1.25581e-25	0.479372	0.654	0.351	1.61648e-21	cDC2-CD1C-CLEC10A-FCER1A	CRYBG1
COTL1	2.68375e-25	0.663078	0.869	0.748	3.45452e-21	cDC2-CD1C-CLEC10A-FCER1A	COTL1
PAK1	2.36424e-24	0.46367	0.688	0.452	3.04325e-20	cDC2-CD1C-CLEC10A-FCER1A	PAK1
FAM89B	7.23455e-24	0.33923	0.423	0.186	9.31231e-20	cDC2-CD1C-CLEC10A-FCER1A	FAM89B
MYL12A	1.00197e-22	0.406768	0.859	0.728	1.28974e-18	cDC2-CD1C-CLEC10A-FCER1A	MYL12A
HIC1	2.24476e-22	0.394111	0.326	0.123	2.88945e-18	cDC2-CD1C-CLEC10A-FCER1A	HIC1
CD2	4.0336e-22	0.325438	0.265	0.086	5.19205e-18	cDC2-CD1C-CLEC10A-FCER1A	CD2
LSP1	1.36296e-21	0.412252	0.836	0.615	1.7544e-17	cDC2-CD1C-CLEC10A-FCER1A	LSP1
ACTR3	2.23218e-21	0.44574	0.779	0.586	2.87326e-17	cDC2-CD1C-CLEC10A-FCER1A	ACTR3
IRF4	2.38146e-21	0.483577	0.326	0.125	3.06541e-17	cDC2-CD1C-CLEC10A-FCER1A	IRF4
UCP2	4.30547e-21	0.401273	0.772	0.539	5.542e-17	cDC2-CD1C-CLEC10A-FCER1A	UCP2
TAP1	4.56017e-21	0.436844	0.611	0.36	5.86985e-17	cDC2-CD1C-CLEC10A-FCER1A	TAP1
GDI2	8.36956e-21	0.386713	0.768	0.597	1.07733e-16	cDC2-CD1C-CLEC10A-FCER1A	GDI2
PLAC8	8.61718e-21	0.584169	0.577	0.327	1.1092e-16	cDC2-CD1C-CLEC10A-FCER1A	PLAC8
ADGRE5	8.60789e-20	0.327015	0.56	0.322	1.10801e-15	cDC2-CD1C-CLEC10A-FCER1A	ADGRE5
ACTG1	1.01235e-19	0.455553	0.943	0.841	1.3031e-15	cDC2-CD1C-CLEC10A-FCER1A	ACTG1
RAC2	1.20155e-19	0.508938	0.597	0.366	1.54664e-15	cDC2-CD1C-CLEC10A-FCER1A	RAC2
HINT1	1.48674e-19	0.355639	0.829	0.681	1.91373e-15	cDC2-CD1C-CLEC10A-FCER1A	HINT1
DENND1B	1.66094e-19	0.365726	0.483	0.244	2.13797e-15	cDC2-CD1C-CLEC10A-FCER1A	DENND1B
LCP1	2.04744e-19	0.418365	0.775	0.594	2.63547e-15	cDC2-CD1C-CLEC10A-FCER1A	LCP1
SPINT2	1.09688e-18	0.473462	0.721	0.533	1.4119e-14	cDC2-CD1C-CLEC10A-FCER1A	SPINT2
CCND3	1.20513e-18	0.354312	0.648	0.392	1.55124e-14	cDC2-CD1C-CLEC10A-FCER1A	CCND3
PHACTR2	1.44396e-18	0.414904	0.436	0.21	1.85866e-14	cDC2-CD1C-CLEC10A-FCER1A	PHACTR2
CST7	1.60591e-18	0.362509	0.52	0.269	2.06712e-14	cDC2-CD1C-CLEC10A-FCER1A	CST7
MYD88	1.787e-18	0.423568	0.56	0.316	2.30022e-14	cDC2-CD1C-CLEC10A-FCER1A	MYD88
HSH2D	2.58395e-18	0.32501	0.295	0.117	3.32606e-14	cDC2-CD1C-CLEC10A-FCER1A	HSH2D
PPA1	3.15578e-18	0.462978	0.802	0.609	4.06212e-14	cDC2-CD1C-CLEC10A-FCER1A	PPA1
SAMHD1	5.18739e-18	0.413414	0.748	0.568	6.67721e-14	cDC2-CD1C-CLEC10A-FCER1A	SAMHD1
SPIB	6.55321e-18	0.538985	0.43	0.22	8.43529e-14	cDC2-CD1C-CLEC10A-FCER1A	SPIB
ARPC2	6.88512e-18	0.344998	0.896	0.773	8.86253e-14	cDC2-CD1C-CLEC10A-FCER1A	ARPC2
PLEKHO1	7.66992e-18	0.496725	0.678	0.459	9.87273e-14	cDC2-CD1C-CLEC10A-FCER1A	PLEKHO1
VASP	8.61309e-18	0.384051	0.705	0.508	1.10868e-13	cDC2-CD1C-CLEC10A-FCER1A	VASP
KCNK6	1.40496e-17	0.373335	0.443	0.229	1.80847e-13	cDC2-CD1C-CLEC10A-FCER1A	KCNK6
PTP4A2	1.49551e-17	0.371775	0.674	0.457	1.92502e-13	cDC2-CD1C-CLEC10A-FCER1A	PTP4A2
HPS5	1.68784e-17	0.342408	0.507	0.283	2.17259e-13	cDC2-CD1C-CLEC10A-FCER1A	HPS5
ITM2C	1.83541e-17	0.394383	0.409	0.202	2.36254e-13	cDC2-CD1C-CLEC10A-FCER1A	ITM2C
FAM118A	2.58252e-16	0.376471	0.409	0.211	3.32422e-12	cDC2-CD1C-CLEC10A-FCER1A	FAM118A
TPM4	1.93467e-15	0.360087	0.779	0.579	2.4903e-11	cDC2-CD1C-CLEC10A-FCER1A	TPM4
NAAA	6.44307e-15	0.356122	0.523	0.299	8.29352e-11	cDC2-CD1C-CLEC10A-FCER1A	NAAA
TCOF1	8.29623e-15	0.52284	0.456	0.255	1.06789e-10	cDC2-CD1C-CLEC10A-FCER1A	TCOF1
H2AFY	8.56712e-15	0.500523	0.795	0.669	1.10276e-10	cDC2-CD1C-CLEC10A-FCER1A	H2AFY
EIF4G3	2.46413e-14	0.344417	0.436	0.232	3.17183e-10	cDC2-CD1C-CLEC10A-FCER1A	EIF4G3
PTPRC	2.88606e-14	0.34609	0.815	0.658	3.71493e-10	cDC2-CD1C-CLEC10A-FCER1A	PTPRC
CORO1A	1.24075e-13	0.339479	0.829	0.668	1.59709e-09	cDC2-CD1C-CLEC10A-FCER1A	CORO1A
YPEL5	2.20577e-13	0.341256	0.728	0.532	2.83926e-09	cDC2-CD1C-CLEC10A-FCER1A	YPEL5
PARK7	2.72864e-13	0.32515	0.802	0.639	3.51231e-09	cDC2-CD1C-CLEC10A-FCER1A	PARK7
CSNK1G2	4.82564e-13	0.328801	0.477	0.272	6.21157e-09	cDC2-CD1C-CLEC10A-FCER1A	CSNK1G2
SIRT7	7.74065e-13	0.340465	0.332	0.164	9.96377e-09	cDC2-CD1C-CLEC10A-FCER1A	SIRT7
LGALS2	1.06004e-12	0.534541	0.329	0.164	1.36449e-08	cDC2-CD1C-CLEC10A-FCER1A	LGALS2
ERP29	1.32794e-12	0.3649	0.762	0.591	1.70932e-08	cDC2-CD1C-CLEC10A-FCER1A	ERP29
KDM5A	1.40532e-12	0.333258	0.497	0.296	1.80893e-08	cDC2-CD1C-CLEC10A-FCER1A	KDM5A
SNRPF	2.0098e-12	0.357314	0.664	0.474	2.58702e-08	cDC2-CD1C-CLEC10A-FCER1A	SNRPF
CCNB1IP1	3.75718e-12	0.379341	0.326	0.162	4.83624e-08	cDC2-CD1C-CLEC10A-FCER1A	CCNB1IP1
GMFG	3.84874e-12	0.349793	0.809	0.651	4.95409e-08	cDC2-CD1C-CLEC10A-FCER1A	GMFG
ENTPD1	4.42808e-12	0.398276	0.617	0.447	5.69983e-08	cDC2-CD1C-CLEC10A-FCER1A	ENTPD1
C12orf75	5.01552e-12	0.372701	0.329	0.17	6.45597e-08	cDC2-CD1C-CLEC10A-FCER1A	C12orf75
G3BP2	6.25387e-12	0.335371	0.507	0.326	8.04998e-08	cDC2-CD1C-CLEC10A-FCER1A	G3BP2
PSME2	1.02991e-11	0.333451	0.805	0.638	1.3257e-07	cDC2-CD1C-CLEC10A-FCER1A	PSME2
PSMB8	1.04183e-11	0.324185	0.681	0.507	1.34104e-07	cDC2-CD1C-CLEC10A-FCER1A	PSMB8
WARS	1.23793e-11	0.422886	0.5	0.312	1.59347e-07	cDC2-CD1C-CLEC10A-FCER1A	WARS
TRAPPC1	1.75482e-11	0.37399	0.732	0.548	2.25881e-07	cDC2-CD1C-CLEC10A-FCER1A	TRAPPC1
ABI3	4.23202e-11	0.400916	0.574	0.393	5.44746e-07	cDC2-CD1C-CLEC10A-FCER1A	ABI3
CPNE3	7.90552e-11	0.354522	0.473	0.281	1.0176e-06	cDC2-CD1C-CLEC10A-FCER1A	CPNE3
STK17A	8.67584e-11	0.327777	0.544	0.364	1.11675e-06	cDC2-CD1C-CLEC10A-FCER1A	STK17A
LDLRAD4	9.34899e-11	0.356521	0.564	0.389	1.2034e-06	cDC2-CD1C-CLEC10A-FCER1A	LDLRAD4
DDT	1.48362e-10	0.359654	0.688	0.502	1.90972e-06	cDC2-CD1C-CLEC10A-FCER1A	DDT
SP110	1.66796e-10	0.449934	0.654	0.456	2.147e-06	cDC2-CD1C-CLEC10A-FCER1A	SP110
CCDC6	4.0586e-10	0.334548	0.463	0.278	5.22423e-06	cDC2-CD1C-CLEC10A-FCER1A	CCDC6
ICAM3	6.18485e-10	0.360636	0.493	0.31	7.96114e-06	cDC2-CD1C-CLEC10A-FCER1A	ICAM3
ZNF292	8.99554e-10	0.327469	0.403	0.239	1.15791e-05	cDC2-CD1C-CLEC10A-FCER1A	ZNF292
PITPNA	1.14325e-09	0.370485	0.389	0.23	1.4716e-05	cDC2-CD1C-CLEC10A-FCER1A	PITPNA
TXN	2.89808e-09	0.409954	0.721	0.543	3.7304e-05	cDC2-CD1C-CLEC10A-FCER1A	TXN
COX20	2.9959e-09	0.398345	0.5	0.327	3.85633e-05	cDC2-CD1C-CLEC10A-FCER1A	COX20
FCER1A	6.23582e-09	0.707602	0.433	0.297	8.02674e-05	cDC2-CD1C-CLEC10A-FCER1A	FCER1A
HLA-DQB2	1.15589e-08	0.339848	0.279	0.154	0.000148786	cDC2-CD1C-CLEC10A-FCER1A	HLA-DQB2
IL1R2	1.89551e-08	0.395715	0.326	0.188	0.00024399	cDC2-CD1C-CLEC10A-FCER1A	IL1R2
HAX1	6.36982e-08	0.389361	0.517	0.347	0.000819924	cDC2-CD1C-CLEC10A-FCER1A	HAX1
SOX4	6.61772e-08	0.505684	0.282	0.16	0.000851832	cDC2-CD1C-CLEC10A-FCER1A	SOX4
NUCB2	1.48113e-07	0.381816	0.285	0.173	0.00190651	cDC2-CD1C-CLEC10A-FCER1A	NUCB2
KHDRBS1	1.56373e-07	0.325799	0.638	0.488	0.00201283	cDC2-CD1C-CLEC10A-FCER1A	KHDRBS1
IDO1	2.07801e-07	0.453168	0.265	0.149	0.00267482	cDC2-CD1C-CLEC10A-FCER1A	IDO1
PDCD6	2.7507e-07	0.394383	0.584	0.414	0.0035407	cDC2-CD1C-CLEC10A-FCER1A	PDCD6
TNFAIP8L2	1.06811e-06	0.325343	0.312	0.194	0.0137487	cDC2-CD1C-CLEC10A-FCER1A	TNFAIP8L2
ATF5	4.78408e-06	0.465852	0.416	0.292	0.0615807	cDC2-CD1C-CLEC10A-FCER1A	ATF5
C9orf78	8.49687e-06	0.338561	0.53	0.386	0.109372	cDC2-CD1C-CLEC10A-FCER1A	C9orf78
PKIB	2.5757e-05	0.324331	0.436	0.327	0.331544	cDC2-CD1C-CLEC10A-FCER1A	PKIB
S100B	3.85041e-05	0.640613	0.332	0.233	0.495625	cDC2-CD1C-CLEC10A-FCER1A	S100B
UPF3A	0.000136384	0.32288	0.319	0.212	1	cDC2-CD1C-CLEC10A-FCER1A	UPF3A
METAP2	0.00138858	0.347144	0.466	0.362	1	cDC2-CD1C-CLEC10A-FCER1A	METAP2
TIMP1	0.0023191	0.337541	0.678	0.562	1	cDC2-CD1C-CLEC10A-FCER1A	TIMP1
CLNK	1.01751e-129	1.20629	0.441	0.031	1.30974e-125	cDC1-CLEC9A-XCR1-BATF3	CLNK
C1orf21	5.55375e-122	0.639807	0.48	0.042	7.14879e-118	cDC1-CLEC9A-XCR1-BATF3	C1orf21
DBN1	9.75472e-119	0.518486	0.356	0.019	1.25563e-114	cDC1-CLEC9A-XCR1-BATF3	DBN1
SNX22	2.1138e-113	0.558418	0.332	0.016	2.72088e-109	cDC1-CLEC9A-XCR1-BATF3	SNX22
RAB7B	1.01386e-102	1.01561	0.535	0.07	1.30504e-98	cDC1-CLEC9A-XCR1-BATF3	RAB7B
CLEC9A	1.55346e-98	1.4223	0.683	0.145	1.99961e-94	cDC1-CLEC9A-XCR1-BATF3	CLEC9A
VAC14	3.24358e-95	1.04602	0.614	0.113	4.17513e-91	cDC1-CLEC9A-XCR1-BATF3	VAC14
EGLN3	2.28912e-94	0.476397	0.386	0.034	2.94655e-90	cDC1-CLEC9A-XCR1-BATF3	EGLN3
TACSTD2	2.17802e-92	1.0179	0.287	0.016	2.80355e-88	cDC1-CLEC9A-XCR1-BATF3	TACSTD2
ANPEP	1.90307e-91	0.752822	0.52	0.075	2.44964e-87	cDC1-CLEC9A-XCR1-BATF3	ANPEP
WDFY4	2.55823e-89	1.42243	0.723	0.2	3.29295e-85	cDC1-CLEC9A-XCR1-BATF3	WDFY4
DYSF	7.62158e-89	0.336433	0.317	0.023	9.8105e-85	cDC1-CLEC9A-XCR1-BATF3	DYSF
SLC24A4	4.00214e-85	0.832288	0.347	0.031	5.15155e-81	cDC1-CLEC9A-XCR1-BATF3	SLC24A4
MPEG1	1.39938e-83	1.24127	0.718	0.194	1.80128e-79	cDC1-CLEC9A-XCR1-BATF3	MPEG1
TMEM14A	1.17608e-81	0.652949	0.49	0.076	1.51385e-77	cDC1-CLEC9A-XCR1-BATF3	TMEM14A
SLAMF7	9.47307e-81	0.966065	0.604	0.124	1.21937e-76	cDC1-CLEC9A-XCR1-BATF3	SLAMF7
PTK2	2.1604e-79	0.420017	0.416	0.05	2.78086e-75	cDC1-CLEC9A-XCR1-BATF3	PTK2
CPNE31	1.13088e-76	1.55584	0.743	0.268	1.45567e-72	cDC1-CLEC9A-XCR1-BATF3	CPNE3
HLA-DOB	2.1461e-76	0.81494	0.564	0.115	2.76246e-72	cDC1-CLEC9A-XCR1-BATF3	HLA-DOB
LGALS21	5.52317e-76	1.44305	0.629	0.148	7.10942e-72	cDC1-CLEC9A-XCR1-BATF3	LGALS2
ASB2	3.1939e-75	0.659065	0.45	0.067	4.11119e-71	cDC1-CLEC9A-XCR1-BATF3	ASB2
TSPAN13	7.80798e-75	0.484228	0.361	0.04	1.00504e-70	cDC1-CLEC9A-XCR1-BATF3	TSPAN13
RUBCNL	9.22767e-75	0.585259	0.455	0.07	1.18779e-70	cDC1-CLEC9A-XCR1-BATF3	RUBCNL
BTLA	5.5954e-73	0.381447	0.337	0.035	7.2024e-69	cDC1-CLEC9A-XCR1-BATF3	BTLA
DNASE1L3	2.51071e-69	1.21804	0.252	0.019	3.23178e-65	cDC1-CLEC9A-XCR1-BATF3	DNASE1L3
C1orf54	2.26797e-67	1.5058	0.802	0.393	2.91933e-63	cDC1-CLEC9A-XCR1-BATF3	C1orf54
CADM1	9.38632e-67	0.996705	0.653	0.182	1.20821e-62	cDC1-CLEC9A-XCR1-BATF3	CADM1
IDO11	4.83999e-65	0.918725	0.594	0.129	6.23003e-61	cDC1-CLEC9A-XCR1-BATF3	IDO1
CCDC126	1.46187e-62	0.479668	0.361	0.05	1.88172e-58	cDC1-CLEC9A-XCR1-BATF3	CCDC126
FKBP1B	1.87368e-62	0.455145	0.337	0.043	2.41181e-58	cDC1-CLEC9A-XCR1-BATF3	FKBP1B
CCND1	5.368e-60	1.21712	0.678	0.234	6.90969e-56	cDC1-CLEC9A-XCR1-BATF3	CCND1
CAMK2D	1.01516e-57	0.895889	0.619	0.183	1.30672e-53	cDC1-CLEC9A-XCR1-BATF3	CAMK2D
BATF3	2.12473e-57	0.740914	0.579	0.15	2.73495e-53	cDC1-CLEC9A-XCR1-BATF3	BATF3
SNX3	4.4011e-56	1.44002	0.851	0.67	5.66509e-52	cDC1-CLEC9A-XCR1-BATF3	SNX3
PLCD1	4.3056e-55	0.442276	0.391	0.068	5.54217e-51	cDC1-CLEC9A-XCR1-BATF3	PLCD1
IRF8	1.25352e-54	1.27894	0.822	0.475	1.61353e-50	cDC1-CLEC9A-XCR1-BATF3	IRF8
CPVL	7.7329e-53	1.5185	0.832	0.551	9.95379e-49	cDC1-CLEC9A-XCR1-BATF3	CPVL
NAAA1	2.95825e-52	1.05097	0.693	0.294	3.80786e-48	cDC1-CLEC9A-XCR1-BATF3	NAAA
SERPINF2	1.9332e-50	0.922269	0.515	0.133	2.48842e-46	cDC1-CLEC9A-XCR1-BATF3	SERPINF2
TMSB4X	2.48365e-49	0.715879	0.995	0.972	3.19696e-45	cDC1-CLEC9A-XCR1-BATF3	TMSB4X
CCSER1	1.10444e-48	0.672479	0.347	0.062	1.42164e-44	cDC1-CLEC9A-XCR1-BATF3	CCSER1
CST3	5.51724e-48	1.08169	0.975	0.888	7.1018e-44	cDC1-CLEC9A-XCR1-BATF3	CST3
PNMA1	1.64517e-47	0.327527	0.312	0.049	2.11766e-43	cDC1-CLEC9A-XCR1-BATF3	PNMA1
NET1	6.94998e-47	0.785153	0.579	0.179	8.94602e-43	cDC1-CLEC9A-XCR1-BATF3	NET1
AIM2	2.87698e-46	0.401056	0.371	0.071	3.70325e-42	cDC1-CLEC9A-XCR1-BATF3	AIM2
LRRCC1	9.79493e-46	0.480109	0.381	0.077	1.2608e-41	cDC1-CLEC9A-XCR1-BATF3	LRRCC1
SEMA7A	1.27218e-45	0.451702	0.401	0.086	1.63755e-41	cDC1-CLEC9A-XCR1-BATF3	SEMA7A
ZNF366	1.46667e-45	0.663446	0.282	0.042	1.8879e-41	cDC1-CLEC9A-XCR1-BATF3	ZNF366
ENPP1	1.74343e-45	0.449943	0.297	0.046	2.24414e-41	cDC1-CLEC9A-XCR1-BATF3	ENPP1
CD226	1.57427e-43	0.629648	0.475	0.128	2.02641e-39	cDC1-CLEC9A-XCR1-BATF3	CD226
NLRC5	2.7316e-43	0.467676	0.446	0.108	3.51611e-39	cDC1-CLEC9A-XCR1-BATF3	NLRC5
KCNK61	3.34103e-42	0.742625	0.619	0.224	4.30057e-38	cDC1-CLEC9A-XCR1-BATF3	KCNK6
LSP11	1.20161e-40	1.09567	0.856	0.621	1.54671e-36	cDC1-CLEC9A-XCR1-BATF3	LSP1
UCP21	1.21848e-40	1.00053	0.812	0.544	1.56842e-36	cDC1-CLEC9A-XCR1-BATF3	UCP2
KIF16B	1.943e-39	0.437451	0.535	0.165	2.50103e-35	cDC1-CLEC9A-XCR1-BATF3	KIF16B
ACTG11	1.00884e-38	0.799617	0.941	0.845	1.29858e-34	cDC1-CLEC9A-XCR1-BATF3	ACTG1
SULF2	1.68122e-38	0.620385	0.51	0.158	2.16407e-34	cDC1-CLEC9A-XCR1-BATF3	SULF2
DAPP1	6.55736e-38	0.517727	0.624	0.228	8.44063e-34	cDC1-CLEC9A-XCR1-BATF3	DAPP1
DENND1B1	3.14046e-37	0.732463	0.629	0.241	4.0424e-33	cDC1-CLEC9A-XCR1-BATF3	DENND1B
LIMA1	8.90956e-37	0.433535	0.361	0.083	1.14684e-32	cDC1-CLEC9A-XCR1-BATF3	LIMA1
RAB11FIP11	5.27212e-36	0.90867	0.624	0.256	6.78628e-32	cDC1-CLEC9A-XCR1-BATF3	RAB11FIP1
ASAP1	8.919e-36	0.674565	0.649	0.293	1.14805e-31	cDC1-CLEC9A-XCR1-BATF3	ASAP1
RAB29	4.93063e-35	0.647902	0.564	0.206	6.34671e-31	cDC1-CLEC9A-XCR1-BATF3	RAB29
TAP11	8.75302e-34	0.783077	0.708	0.362	1.12669e-29	cDC1-CLEC9A-XCR1-BATF3	TAP1
TAGLN2	1.02376e-33	0.807861	0.797	0.569	1.31778e-29	cDC1-CLEC9A-XCR1-BATF3	TAGLN2
SELPLG	1.46857e-33	0.565318	0.604	0.25	1.89034e-29	cDC1-CLEC9A-XCR1-BATF3	SELPLG
PDLIM1	1.17892e-32	0.360569	0.262	0.049	1.51751e-28	cDC1-CLEC9A-XCR1-BATF3	PDLIM1
ACTN1	2.77024e-32	0.477885	0.594	0.242	3.56585e-28	cDC1-CLEC9A-XCR1-BATF3	ACTN1
FLT3	4.03884e-32	0.622212	0.47	0.159	5.19879e-28	cDC1-CLEC9A-XCR1-BATF3	FLT3
GSTP1	4.25915e-31	0.781031	0.847	0.735	5.48238e-27	cDC1-CLEC9A-XCR1-BATF3	GSTP1
SHTN1	4.81171e-31	0.879096	0.698	0.398	6.19363e-27	cDC1-CLEC9A-XCR1-BATF3	SHTN1
S100A10	4.27895e-30	0.880434	0.832	0.638	5.50786e-26	cDC1-CLEC9A-XCR1-BATF3	S100A10
MYO9A	9.16147e-30	0.418126	0.371	0.102	1.17926e-25	cDC1-CLEC9A-XCR1-BATF3	MYO9A
CNN21	3.74396e-29	0.663229	0.708	0.395	4.81923e-25	cDC1-CLEC9A-XCR1-BATF3	CNN2
ANXA6	3.95763e-29	0.571857	0.52	0.199	5.09427e-25	cDC1-CLEC9A-XCR1-BATF3	ANXA6
P2RY6	4.35896e-29	0.467699	0.381	0.112	5.61085e-25	cDC1-CLEC9A-XCR1-BATF3	P2RY6
NCOA7	4.57507e-29	0.507653	0.525	0.201	5.88903e-25	cDC1-CLEC9A-XCR1-BATF3	NCOA7
HSH2D1	6.0992e-29	0.323929	0.396	0.116	7.85089e-25	cDC1-CLEC9A-XCR1-BATF3	HSH2D
SLC46A3	6.33783e-28	0.374404	0.421	0.134	8.15806e-24	cDC1-CLEC9A-XCR1-BATF3	SLC46A3
SLAMF8	8.54907e-28	0.41338	0.559	0.23	1.10044e-23	cDC1-CLEC9A-XCR1-BATF3	SLAMF8
ACTB	1.67799e-27	0.573542	0.995	0.933	2.15991e-23	cDC1-CLEC9A-XCR1-BATF3	ACTB
MCOLN2	6.14084e-27	0.493594	0.446	0.157	7.90448e-23	cDC1-CLEC9A-XCR1-BATF3	MCOLN2
APOL3	2.14202e-26	0.433697	0.441	0.151	2.75721e-22	cDC1-CLEC9A-XCR1-BATF3	APOL3
MZT2A	3.55567e-26	0.599561	0.688	0.384	4.57686e-22	cDC1-CLEC9A-XCR1-BATF3	MZT2A
LIMD2	5.40543e-26	0.784688	0.738	0.46	6.95787e-22	cDC1-CLEC9A-XCR1-BATF3	LIMD2
VAV3	6.0006e-26	0.567234	0.436	0.15	7.72398e-22	cDC1-CLEC9A-XCR1-BATF3	VAV3
LYRM4	7.03826e-26	0.604722	0.505	0.195	9.05965e-22	cDC1-CLEC9A-XCR1-BATF3	LYRM4
CYB5R3	7.50648e-26	0.690417	0.649	0.371	9.66234e-22	cDC1-CLEC9A-XCR1-BATF3	CYB5R3
ACSL5	1.03774e-25	0.528417	0.421	0.14	1.33578e-21	cDC1-CLEC9A-XCR1-BATF3	ACSL5
BCL2L11	1.41797e-25	0.573931	0.52	0.224	1.82521e-21	cDC1-CLEC9A-XCR1-BATF3	BCL2L11
ICAM31	1.64804e-25	0.575444	0.609	0.307	2.12135e-21	cDC1-CLEC9A-XCR1-BATF3	ICAM3
TXN1	1.74003e-25	1.26836	0.743	0.547	2.23977e-21	cDC1-CLEC9A-XCR1-BATF3	TXN
LSM6	2.69435e-25	0.634848	0.604	0.315	3.46817e-21	cDC1-CLEC9A-XCR1-BATF3	LSM6
RGCC	5.62905e-25	0.680936	0.772	0.498	7.24572e-21	cDC1-CLEC9A-XCR1-BATF3	RGCC
CLIC2	1.20013e-24	0.404518	0.495	0.191	1.54481e-20	cDC1-CLEC9A-XCR1-BATF3	CLIC2
LDLRAD3	1.95174e-24	0.363285	0.267	0.065	2.51228e-20	cDC1-CLEC9A-XCR1-BATF3	LDLRAD3
ABL1	3.53609e-24	0.471898	0.297	0.08	4.55165e-20	cDC1-CLEC9A-XCR1-BATF3	ABL1
PPM1M	4.16837e-24	0.323958	0.475	0.183	5.36553e-20	cDC1-CLEC9A-XCR1-BATF3	PPM1M
CDKN2D	1.11839e-23	0.363583	0.332	0.097	1.43959e-19	cDC1-CLEC9A-XCR1-BATF3	CDKN2D
CD59	2.29704e-23	0.412501	0.564	0.246	2.95675e-19	cDC1-CLEC9A-XCR1-BATF3	CD59
RHOF	2.44929e-23	0.366145	0.485	0.194	3.15273e-19	cDC1-CLEC9A-XCR1-BATF3	RHOF
ADAM19	2.7803e-23	0.409123	0.381	0.124	3.57881e-19	cDC1-CLEC9A-XCR1-BATF3	ADAM19
PSMB9	3.33728e-23	0.665602	0.767	0.546	4.29574e-19	cDC1-CLEC9A-XCR1-BATF3	PSMB9
CSRP1	3.40159e-23	0.619839	0.525	0.24	4.37853e-19	cDC1-CLEC9A-XCR1-BATF3	CSRP1
GPR157	4.28559e-23	0.373576	0.327	0.098	5.51641e-19	cDC1-CLEC9A-XCR1-BATF3	GPR157
ITGB7	1.42487e-22	0.365312	0.366	0.119	1.83409e-18	cDC1-CLEC9A-XCR1-BATF3	ITGB7
TMSB101	2.32614e-22	0.434105	0.975	0.934	2.99421e-18	cDC1-CLEC9A-XCR1-BATF3	TMSB10
ENSA	2.9649e-22	0.595227	0.738	0.563	3.81641e-18	cDC1-CLEC9A-XCR1-BATF3	ENSA
S100B1	3.84249e-22	0.960524	0.5	0.224	4.94606e-18	cDC1-CLEC9A-XCR1-BATF3	S100B
REPIN1	4.90961e-22	0.43206	0.46	0.181	6.31965e-18	cDC1-CLEC9A-XCR1-BATF3	REPIN1
SFT2D2	5.3906e-22	0.660328	0.554	0.269	6.93878e-18	cDC1-CLEC9A-XCR1-BATF3	SFT2D2
ERAP2	8.80417e-22	0.348656	0.45	0.175	1.13327e-17	cDC1-CLEC9A-XCR1-BATF3	ERAP2
BIRC3	1.15161e-21	0.554373	0.564	0.275	1.48235e-17	cDC1-CLEC9A-XCR1-BATF3	BIRC3
RAB11FIP4	1.44148e-21	0.457144	0.302	0.09	1.85547e-17	cDC1-CLEC9A-XCR1-BATF3	RAB11FIP4
NAP1L1	2.76014e-21	0.51833	0.856	0.711	3.55285e-17	cDC1-CLEC9A-XCR1-BATF3	NAP1L1
CCDC61	3.19036e-21	0.5639	0.559	0.278	4.10663e-17	cDC1-CLEC9A-XCR1-BATF3	CCDC6
LPP	7.37985e-21	0.533038	0.525	0.239	9.49934e-17	cDC1-CLEC9A-XCR1-BATF3	LPP
CD48	8.24275e-21	0.613958	0.723	0.478	1.06101e-16	cDC1-CLEC9A-XCR1-BATF3	CD48
CYTOR	8.77488e-21	0.633973	0.644	0.335	1.1295e-16	cDC1-CLEC9A-XCR1-BATF3	CYTOR
AGPAT1	1.3181e-20	0.350746	0.51	0.225	1.69666e-16	cDC1-CLEC9A-XCR1-BATF3	AGPAT1
SRP19	1.39492e-20	0.691511	0.599	0.333	1.79554e-16	cDC1-CLEC9A-XCR1-BATF3	SRP19
WARS1	2.00677e-20	0.56953	0.609	0.31	2.58311e-16	cDC1-CLEC9A-XCR1-BATF3	WARS
NME4	2.80753e-20	0.40982	0.505	0.23	3.61385e-16	cDC1-CLEC9A-XCR1-BATF3	NME4
TPMT	3.78284e-20	0.416136	0.53	0.249	4.86927e-16	cDC1-CLEC9A-XCR1-BATF3	TPMT
PSTPIP1	7.97616e-20	0.363968	0.426	0.173	1.02669e-15	cDC1-CLEC9A-XCR1-BATF3	PSTPIP1
TAP2	9.7767e-20	0.385651	0.5	0.232	1.25846e-15	cDC1-CLEC9A-XCR1-BATF3	TAP2
CBX6	1.15853e-19	0.542553	0.426	0.169	1.49126e-15	cDC1-CLEC9A-XCR1-BATF3	CBX6
FNBP1	1.33862e-19	0.627603	0.698	0.478	1.72307e-15	cDC1-CLEC9A-XCR1-BATF3	FNBP1
PIK3CB	1.36421e-19	0.417692	0.361	0.129	1.75601e-15	cDC1-CLEC9A-XCR1-BATF3	PIK3CB
HLA-DPB1	2.46829e-19	0.442728	0.96	0.9	3.17719e-15	cDC1-CLEC9A-XCR1-BATF3	HLA-DPB1
OXSR1	2.61412e-19	0.539936	0.5	0.223	3.3649e-15	cDC1-CLEC9A-XCR1-BATF3	OXSR1
GAS7	3.48582e-19	0.475663	0.351	0.124	4.48695e-15	cDC1-CLEC9A-XCR1-BATF3	GAS7
HLA-B	4.04886e-19	0.425461	0.941	0.879	5.21169e-15	cDC1-CLEC9A-XCR1-BATF3	HLA-B
FLOT2	5.94526e-19	0.402529	0.55	0.274	7.65274e-15	cDC1-CLEC9A-XCR1-BATF3	FLOT2
RAB32	6.95562e-19	0.579937	0.644	0.41	8.95327e-15	cDC1-CLEC9A-XCR1-BATF3	RAB32
TMEM50B	1.51589e-18	0.365044	0.465	0.201	1.95126e-14	cDC1-CLEC9A-XCR1-BATF3	TMEM50B
DSTN	1.64539e-18	0.43257	0.574	0.322	2.11795e-14	cDC1-CLEC9A-XCR1-BATF3	DSTN
SEPHS2	1.74784e-18	0.587599	0.455	0.205	2.24982e-14	cDC1-CLEC9A-XCR1-BATF3	SEPHS2
SMCO41	2.36497e-18	0.384499	0.614	0.321	3.04419e-14	cDC1-CLEC9A-XCR1-BATF3	SMCO4
SLCO3A1	6.94027e-18	0.355219	0.282	0.091	8.93352e-14	cDC1-CLEC9A-XCR1-BATF3	SLCO3A1
G3BP21	8.62285e-18	0.501	0.564	0.328	1.10993e-13	cDC1-CLEC9A-XCR1-BATF3	G3BP2
SMIM14	1.13487e-17	0.466183	0.545	0.27	1.4608e-13	cDC1-CLEC9A-XCR1-BATF3	SMIM14
VIM	1.28279e-17	0.470341	0.936	0.856	1.65121e-13	cDC1-CLEC9A-XCR1-BATF3	VIM
HDAC9	1.706e-17	0.492695	0.554	0.273	2.19597e-13	cDC1-CLEC9A-XCR1-BATF3	HDAC9
EHD4	2.44927e-17	0.369326	0.431	0.184	3.15271e-13	cDC1-CLEC9A-XCR1-BATF3	EHD4
CD38	2.59904e-17	0.382703	0.426	0.172	3.34548e-13	cDC1-CLEC9A-XCR1-BATF3	CD38
ST3GAL5	5.82296e-17	0.342841	0.361	0.146	7.49531e-13	cDC1-CLEC9A-XCR1-BATF3	ST3GAL5
RGS10	1.06233e-16	0.549395	0.837	0.741	1.36743e-12	cDC1-CLEC9A-XCR1-BATF3	RGS10
LYZ	1.13914e-16	0.4943	0.822	0.669	1.4663e-12	cDC1-CLEC9A-XCR1-BATF3	LYZ
CHN2	2.00409e-16	0.3405	0.297	0.102	2.57967e-12	cDC1-CLEC9A-XCR1-BATF3	CHN2
HLA-DQB1	2.04749e-16	0.390525	0.941	0.859	2.63553e-12	cDC1-CLEC9A-XCR1-BATF3	HLA-DQB1
PPA11	3.92091e-16	0.375457	0.782	0.617	5.04699e-12	cDC1-CLEC9A-XCR1-BATF3	PPA1
LCP11	3.93073e-16	0.556854	0.777	0.6	5.05964e-12	cDC1-CLEC9A-XCR1-BATF3	LCP1
FAM135A	4.86424e-16	0.462243	0.342	0.132	6.26125e-12	cDC1-CLEC9A-XCR1-BATF3	FAM135A
CYP2S1	6.66656e-16	0.41167	0.391	0.175	8.5812e-12	cDC1-CLEC9A-XCR1-BATF3	CYP2S1
MYL6	1.0086e-15	0.33729	0.886	0.834	1.29827e-11	cDC1-CLEC9A-XCR1-BATF3	MYL6
1961-09-01	1.04858e-15	0.416575	0.688	0.48	1.34974e-11	cDC1-CLEC9A-XCR1-BATF3	2021-09-06
ABRACL	1.4622e-15	0.354204	0.594	0.349	1.88214e-11	cDC1-CLEC9A-XCR1-BATF3	ABRACL
UPF2	1.47413e-15	0.36559	0.54	0.292	1.8975e-11	cDC1-CLEC9A-XCR1-BATF3	UPF2
SERPINB1	1.48224e-15	0.635553	0.792	0.63	1.90794e-11	cDC1-CLEC9A-XCR1-BATF3	SERPINB1
SERPINF1	1.69574e-15	0.714553	0.683	0.44	2.18276e-11	cDC1-CLEC9A-XCR1-BATF3	SERPINF1
PPT1	2.42792e-15	0.5529	0.748	0.65	3.12522e-11	cDC1-CLEC9A-XCR1-BATF3	PPT1
ATG3	2.46429e-15	0.425893	0.678	0.488	3.17204e-11	cDC1-CLEC9A-XCR1-BATF3	ATG3
HLA-F	2.92735e-15	0.4798	0.688	0.468	3.76808e-11	cDC1-CLEC9A-XCR1-BATF3	HLA-F
FUCA1	3.84391e-15	0.376195	0.411	0.187	4.94788e-11	cDC1-CLEC9A-XCR1-BATF3	FUCA1
TLR10	5.84203e-15	0.476919	0.337	0.131	7.51986e-11	cDC1-CLEC9A-XCR1-BATF3	TLR10
MARCH1	1.06163e-14	0.516047	0.649	0.391	1.36653e-10	cDC1-CLEC9A-XCR1-BATF3	MARCH1
SUB1	2.77822e-14	0.459589	0.807	0.724	3.57612e-10	cDC1-CLEC9A-XCR1-BATF3	SUB1
PTMS	3.03303e-14	0.439149	0.683	0.446	3.90411e-10	cDC1-CLEC9A-XCR1-BATF3	PTMS
TPM3	3.06746e-14	0.427425	0.817	0.733	3.94843e-10	cDC1-CLEC9A-XCR1-BATF3	TPM3
VDR	3.83442e-14	0.336897	0.351	0.155	4.93567e-10	cDC1-CLEC9A-XCR1-BATF3	VDR
SEMA4A	4.45843e-14	0.347218	0.441	0.21	5.73889e-10	cDC1-CLEC9A-XCR1-BATF3	SEMA4A
LARP4B	4.79803e-14	0.390736	0.401	0.178	6.17603e-10	cDC1-CLEC9A-XCR1-BATF3	LARP4B
ATF7IP	8.67677e-14	0.36142	0.46	0.228	1.11687e-09	cDC1-CLEC9A-XCR1-BATF3	ATF7IP
PACS1	1.19698e-13	0.481515	0.391	0.178	1.54076e-09	cDC1-CLEC9A-XCR1-BATF3	PACS1
TAPBP	1.30208e-13	0.457921	0.698	0.544	1.67604e-09	cDC1-CLEC9A-XCR1-BATF3	TAPBP
AHNAK	1.49417e-13	0.453125	0.619	0.397	1.92329e-09	cDC1-CLEC9A-XCR1-BATF3	AHNAK
SYMPK	1.53531e-13	0.36906	0.421	0.197	1.97625e-09	cDC1-CLEC9A-XCR1-BATF3	SYMPK
HLA-DQA2	1.63449e-13	0.703507	0.465	0.243	2.10391e-09	cDC1-CLEC9A-XCR1-BATF3	HLA-DQA2
DUSP4	2.17302e-13	0.489521	0.584	0.364	2.79711e-09	cDC1-CLEC9A-XCR1-BATF3	DUSP4
PPP1R14B	2.54864e-13	0.46282	0.49	0.264	3.28061e-09	cDC1-CLEC9A-XCR1-BATF3	PPP1R14B
GALNT7	2.71522e-13	0.445663	0.252	0.09	3.49503e-09	cDC1-CLEC9A-XCR1-BATF3	GALNT7
EFHD2	4.61025e-13	0.499279	0.723	0.495	5.93431e-09	cDC1-CLEC9A-XCR1-BATF3	EFHD2
NAV1	5.38472e-13	0.404442	0.386	0.181	6.93122e-09	cDC1-CLEC9A-XCR1-BATF3	NAV1
CD40	6.12529e-13	0.329116	0.455	0.224	7.88447e-09	cDC1-CLEC9A-XCR1-BATF3	CD40
EEF1B2	8.18499e-13	0.432712	0.861	0.799	1.05357e-08	cDC1-CLEC9A-XCR1-BATF3	EEF1B2
ARPC21	8.85131e-13	0.386691	0.866	0.779	1.13934e-08	cDC1-CLEC9A-XCR1-BATF3	ARPC2
ETV6	1.19272e-12	0.456854	0.604	0.387	1.53526e-08	cDC1-CLEC9A-XCR1-BATF3	ETV6
HMGA1	1.35334e-12	0.347357	0.668	0.471	1.74202e-08	cDC1-CLEC9A-XCR1-BATF3	HMGA1
C12orf45	1.43132e-12	0.335684	0.545	0.296	1.84239e-08	cDC1-CLEC9A-XCR1-BATF3	C12orf45
PTPRE	2.08096e-12	0.496874	0.713	0.548	2.67862e-08	cDC1-CLEC9A-XCR1-BATF3	PTPRE
TRMT112	2.12083e-12	0.377036	0.743	0.583	2.72993e-08	cDC1-CLEC9A-XCR1-BATF3	TRMT112
BOD1L1	2.25933e-12	0.56272	0.574	0.34	2.90821e-08	cDC1-CLEC9A-XCR1-BATF3	BOD1L1
HLA-C	2.40979e-12	0.375928	0.916	0.841	3.10188e-08	cDC1-CLEC9A-XCR1-BATF3	HLA-C
PTP4A21	4.09278e-12	0.520544	0.668	0.465	5.26823e-08	cDC1-CLEC9A-XCR1-BATF3	PTP4A2
ADA2	6.03898e-12	0.514917	0.604	0.385	7.77337e-08	cDC1-CLEC9A-XCR1-BATF3	ADA2
BID	8.82455e-12	0.429805	0.673	0.486	1.1359e-07	cDC1-CLEC9A-XCR1-BATF3	BID
HLA-DPA1	1.20745e-11	0.329094	0.97	0.916	1.55423e-07	cDC1-CLEC9A-XCR1-BATF3	HLA-DPA1
PRKAR1A	2.05126e-11	0.337286	0.629	0.445	2.64038e-07	cDC1-CLEC9A-XCR1-BATF3	PRKAR1A
STX12	3.8223e-11	0.32749	0.569	0.363	4.92007e-07	cDC1-CLEC9A-XCR1-BATF3	STX12
DCUN1D1	6.78337e-11	0.340464	0.391	0.193	8.73156e-07	cDC1-CLEC9A-XCR1-BATF3	DCUN1D1
CST71	1.00706e-10	0.402445	0.495	0.279	1.29629e-06	cDC1-CLEC9A-XCR1-BATF3	CST7
COX5A	1.20649e-10	0.40014	0.762	0.627	1.55299e-06	cDC1-CLEC9A-XCR1-BATF3	COX5A
RAB8B	1.2816e-10	0.333323	0.51	0.296	1.64967e-06	cDC1-CLEC9A-XCR1-BATF3	RAB8B
SAMHD11	1.38791e-10	0.408209	0.733	0.575	1.78652e-06	cDC1-CLEC9A-XCR1-BATF3	SAMHD1
LRRK2	1.43346e-10	0.401685	0.436	0.24	1.84514e-06	cDC1-CLEC9A-XCR1-BATF3	LRRK2
CKLF	1.43696e-10	0.422851	0.728	0.577	1.84965e-06	cDC1-CLEC9A-XCR1-BATF3	CKLF
PFN1	1.67917e-10	0.351443	0.896	0.813	2.16143e-06	cDC1-CLEC9A-XCR1-BATF3	PFN1
KDM5A1	2.9692e-10	0.411935	0.51	0.302	3.82196e-06	cDC1-CLEC9A-XCR1-BATF3	KDM5A
MAP3K13	2.97342e-10	0.366988	0.515	0.3	3.82739e-06	cDC1-CLEC9A-XCR1-BATF3	MAP3K13
CMIP	3.66749e-10	0.393452	0.53	0.321	4.72079e-06	cDC1-CLEC9A-XCR1-BATF3	CMIP
ARHGAP5	4.98571e-10	0.380349	0.431	0.241	6.4176e-06	cDC1-CLEC9A-XCR1-BATF3	ARHGAP5
CCDC69	5.23012e-10	0.32944	0.361	0.182	6.73221e-06	cDC1-CLEC9A-XCR1-BATF3	CCDC69
STMP1	6.08423e-10	0.339826	0.594	0.4	7.83162e-06	cDC1-CLEC9A-XCR1-BATF3	STMP1
MSRB1	7.39439e-10	0.355835	0.322	0.157	9.51806e-06	cDC1-CLEC9A-XCR1-BATF3	MSRB1
COTL11	1.08651e-09	0.343127	0.851	0.753	1.39855e-05	cDC1-CLEC9A-XCR1-BATF3	COTL1
FGL2	1.0938e-09	0.420733	0.782	0.632	1.40794e-05	cDC1-CLEC9A-XCR1-BATF3	FGL2
HINT11	1.57105e-09	0.381802	0.772	0.69	2.02226e-05	cDC1-CLEC9A-XCR1-BATF3	HINT1
CAPNS1	2.14047e-09	0.391858	0.609	0.416	2.75521e-05	cDC1-CLEC9A-XCR1-BATF3	CAPNS1
CIITA	2.33187e-09	0.467816	0.629	0.426	3.00158e-05	cDC1-CLEC9A-XCR1-BATF3	CIITA
INPP5D	2.86259e-09	0.396699	0.589	0.396	3.68472e-05	cDC1-CLEC9A-XCR1-BATF3	INPP5D
FGD2	3.06941e-09	0.566398	0.515	0.326	3.95094e-05	cDC1-CLEC9A-XCR1-BATF3	FGD2
PTRHD1	3.23885e-09	0.378776	0.584	0.371	4.16905e-05	cDC1-CLEC9A-XCR1-BATF3	PTRHD1
CDV3	5.14931e-09	0.353249	0.594	0.421	6.62819e-05	cDC1-CLEC9A-XCR1-BATF3	CDV3
BTN2A2	5.64034e-09	0.421117	0.376	0.198	7.26025e-05	cDC1-CLEC9A-XCR1-BATF3	BTN2A2
AES	6.00768e-09	0.344995	0.574	0.386	7.73308e-05	cDC1-CLEC9A-XCR1-BATF3	AES
YWHAZ	1.02507e-08	0.326549	0.782	0.644	0.000131947	cDC1-CLEC9A-XCR1-BATF3	YWHAZ
PARP1	1.16978e-08	0.487191	0.545	0.361	0.000150574	cDC1-CLEC9A-XCR1-BATF3	PARP1
ANKRD12	1.49596e-08	0.328838	0.658	0.478	0.00019256	cDC1-CLEC9A-XCR1-BATF3	ANKRD12
CD74	1.75143e-08	0.359282	0.98	0.962	0.000225445	cDC1-CLEC9A-XCR1-BATF3	CD74
SRM	2.76802e-08	0.364498	0.351	0.189	0.0003563	cDC1-CLEC9A-XCR1-BATF3	SRM
MAP4	3.15486e-08	0.328657	0.475	0.286	0.000406094	cDC1-CLEC9A-XCR1-BATF3	MAP4
PSMC6	3.84982e-08	0.323878	0.485	0.287	0.000495549	cDC1-CLEC9A-XCR1-BATF3	PSMC6
IRF1	4.78756e-08	0.559491	0.554	0.378	0.000616255	cDC1-CLEC9A-XCR1-BATF3	IRF1
TMED3	6.56742e-08	0.385071	0.48	0.303	0.000845358	cDC1-CLEC9A-XCR1-BATF3	TMED3
DYNC1LI1	1.28827e-07	0.389935	0.48	0.3	0.00165826	cDC1-CLEC9A-XCR1-BATF3	DYNC1LI1
NSMAF	1.64936e-07	0.344897	0.366	0.204	0.00212306	cDC1-CLEC9A-XCR1-BATF3	NSMAF
CCDC88A	2.07835e-07	0.464271	0.678	0.542	0.00267526	cDC1-CLEC9A-XCR1-BATF3	CCDC88A
BTG2	2.17698e-07	0.34285	0.708	0.575	0.00280221	cDC1-CLEC9A-XCR1-BATF3	BTG2
ID2	2.45248e-07	0.390918	0.812	0.726	0.00315683	cDC1-CLEC9A-XCR1-BATF3	ID2
MZT2B	3.13126e-07	0.375166	0.688	0.563	0.00403056	cDC1-CLEC9A-XCR1-BATF3	MZT2B
XIST	4.37945e-07	0.570543	0.287	0.158	0.00563723	cDC1-CLEC9A-XCR1-BATF3	XIST
EXOC5	7.30162e-07	0.39001	0.277	0.142	0.00939864	cDC1-CLEC9A-XCR1-BATF3	EXOC5
ELOVL1	1.84382e-06	0.331218	0.49	0.303	0.0237337	cDC1-CLEC9A-XCR1-BATF3	ELOVL1
SNRPF1	1.86559e-06	0.365839	0.653	0.482	0.0240139	cDC1-CLEC9A-XCR1-BATF3	SNRPF
ADSS	2.10198e-06	0.343148	0.391	0.23	0.0270567	cDC1-CLEC9A-XCR1-BATF3	ADSS
OFD1	2.76458e-06	0.393256	0.505	0.339	0.0355857	cDC1-CLEC9A-XCR1-BATF3	OFD1
SETX	2.85728e-06	0.461612	0.426	0.274	0.036779	cDC1-CLEC9A-XCR1-BATF3	SETX
CARHSP1	3.61837e-06	0.379487	0.322	0.189	0.0465757	cDC1-CLEC9A-XCR1-BATF3	CARHSP1
CALM3	4.00328e-06	0.327828	0.604	0.448	0.0515302	cDC1-CLEC9A-XCR1-BATF3	CALM3
KIAA0930	4.6976e-06	0.335552	0.426	0.269	0.0604675	cDC1-CLEC9A-XCR1-BATF3	KIAA0930
NABP1	5.64887e-06	0.516883	0.53	0.397	0.0727123	cDC1-CLEC9A-XCR1-BATF3	NABP1
NKTR	6.34569e-06	0.466291	0.49	0.334	0.0816817	cDC1-CLEC9A-XCR1-BATF3	NKTR
SPN	7.86589e-06	0.400479	0.431	0.265	0.10125	cDC1-CLEC9A-XCR1-BATF3	SPN
SRSF7	8.65448e-06	0.328551	0.703	0.606	0.1114	cDC1-CLEC9A-XCR1-BATF3	SRSF7
PLCG2	9.07576e-06	0.861858	0.45	0.318	0.116823	cDC1-CLEC9A-XCR1-BATF3	PLCG2
PPM1G	9.56767e-06	0.329664	0.559	0.399	0.123155	cDC1-CLEC9A-XCR1-BATF3	PPM1G
TTC37	2.41911e-05	0.415135	0.312	0.178	0.311387	cDC1-CLEC9A-XCR1-BATF3	TTC37
ZYX	4.15469e-05	0.329083	0.658	0.529	0.534792	cDC1-CLEC9A-XCR1-BATF3	ZYX
CYB561A3	0.000158806	0.323528	0.302	0.181	1	cDC1-CLEC9A-XCR1-BATF3	CYB561A3
SMIM10L1	0.000176617	0.354489	0.322	0.208	1	cDC1-CLEC9A-XCR1-BATF3	SMIM10L1
PPP1CA	0.000205225	0.380372	0.708	0.58	1	cDC1-CLEC9A-XCR1-BATF3	PPP1CA
IER5	0.000213692	0.568295	0.579	0.472	1	cDC1-CLEC9A-XCR1-BATF3	IER5
CPSF3	0.000358297	0.322599	0.252	0.151	1	cDC1-CLEC9A-XCR1-BATF3	CPSF3
VMO1	0.000504046	0.396414	0.45	0.345	1	cDC1-CLEC9A-XCR1-BATF3	VMO1
TRA2A	0.000969142	0.336633	0.49	0.359	1	cDC1-CLEC9A-XCR1-BATF3	TRA2A
CHFR	0.000989774	0.360305	0.272	0.174	1	cDC1-CLEC9A-XCR1-BATF3	CHFR
PABPN1	0.00334411	0.326643	0.49	0.358	1	cDC1-CLEC9A-XCR1-BATF3	PABPN1
LAMP3	9.13195e-99	1.70663	0.465	0.045	1.17546e-94	mDC-LAMP3-CCR7-CD80	LAMP3
CCR7	1.15203e-65	1.93468	0.51	0.091	1.4829e-61	mDC-LAMP3-CCR7-CD80	CCR7
UBD	2.20094e-63	1.48957	0.28	0.023	2.83305e-59	mDC-LAMP3-CCR7-CD80	UBD
BCL2L14	5.25819e-61	0.69894	0.395	0.054	6.76834e-57	mDC-LAMP3-CCR7-CD80	BCL2L14
CD274	8.89236e-56	0.475058	0.287	0.029	1.14462e-51	mDC-LAMP3-CCR7-CD80	CD274
CXCL9	1.06194e-54	1.98419	0.497	0.101	1.36693e-50	mDC-LAMP3-CCR7-CD80	CXCL9
IDO12	2.71247e-53	1.59861	0.567	0.138	3.49149e-49	mDC-LAMP3-CCR7-CD80	IDO1
MREG	7.49479e-52	0.398597	0.274	0.029	9.6473e-48	mDC-LAMP3-CCR7-CD80	MREG
MGLL	1.2504e-48	0.979066	0.395	0.069	1.60951e-44	mDC-LAMP3-CCR7-CD80	MGLL
CXCL11	3.79595e-46	1.43844	0.287	0.037	4.88615e-42	mDC-LAMP3-CCR7-CD80	CXCL11
IL7R	9.84479e-42	1.61833	0.478	0.119	1.26722e-37	mDC-LAMP3-CCR7-CD80	IL7R
FSCN1	2.75848e-41	1.35957	0.554	0.168	3.55071e-37	mDC-LAMP3-CCR7-CD80	FSCN1
NUB1	3.29699e-40	1.47519	0.701	0.317	4.24388e-36	mDC-LAMP3-CCR7-CD80	NUB1
GBP1	6.5382e-40	1.61237	0.65	0.244	8.41597e-36	mDC-LAMP3-CCR7-CD80	GBP1
MARCKSL1	7.03662e-40	1.8056	0.58	0.203	9.05754e-36	mDC-LAMP3-CCR7-CD80	MARCKSL1
IL32	3.30331e-39	1.1004	0.452	0.108	4.25202e-35	mDC-LAMP3-CCR7-CD80	IL32
HAPLN3	1.57123e-37	0.557167	0.452	0.112	2.02248e-33	mDC-LAMP3-CCR7-CD80	HAPLN3
ARHGAP10	1.78053e-37	0.593467	0.312	0.055	2.2919e-33	mDC-LAMP3-CCR7-CD80	ARHGAP10
TXN2	7.8894e-36	1.74709	0.809	0.547	1.01552e-31	mDC-LAMP3-CCR7-CD80	TXN
TNFAIP2	8.57808e-36	1.29708	0.675	0.289	1.10417e-31	mDC-LAMP3-CCR7-CD80	TNFAIP2
TRAF1	1.45306e-35	0.798099	0.503	0.142	1.87038e-31	mDC-LAMP3-CCR7-CD80	TRAF1
CXCL10	2.22667e-35	2.19167	0.427	0.106	2.86617e-31	mDC-LAMP3-CCR7-CD80	CXCL10
RELB	9.17223e-34	0.817377	0.592	0.215	1.18065e-29	mDC-LAMP3-CCR7-CD80	RELB
BIRC31	9.56784e-34	2.19409	0.624	0.276	1.23157e-29	mDC-LAMP3-CCR7-CD80	BIRC3
ARAP2	1.50875e-33	0.635075	0.439	0.121	1.94206e-29	mDC-LAMP3-CCR7-CD80	ARAP2
TBC1D8	9.30529e-31	0.727383	0.484	0.157	1.19778e-26	mDC-LAMP3-CCR7-CD80	TBC1D8
IL15	8.85793e-30	0.596763	0.465	0.139	1.14019e-25	mDC-LAMP3-CCR7-CD80	IL15
ANTXR2	2.2696e-28	0.473425	0.344	0.086	2.92143e-24	mDC-LAMP3-CCR7-CD80	ANTXR2
DAPP11	1.00644e-26	1.18678	0.561	0.238	1.29549e-22	mDC-LAMP3-CCR7-CD80	DAPP1
GPR1571	3.22063e-26	0.77528	0.363	0.1	4.14559e-22	mDC-LAMP3-CCR7-CD80	GPR157
IL4I1	4.10949e-26	0.610759	0.484	0.168	5.28973e-22	mDC-LAMP3-CCR7-CD80	IL4I1
CD401	4.69026e-26	0.910803	0.548	0.223	6.0373e-22	mDC-LAMP3-CCR7-CD80	CD40
SLAMF71	3.02608e-24	0.768069	0.439	0.141	3.89517e-20	mDC-LAMP3-CCR7-CD80	SLAMF7
IRF11	6.91195e-24	1.01069	0.688	0.373	8.89706e-20	mDC-LAMP3-CCR7-CD80	IRF1
DHX58	7.82359e-24	0.372794	0.325	0.086	1.00705e-19	mDC-LAMP3-CCR7-CD80	DHX58
TNIP2	1.15187e-23	0.628867	0.51	0.209	1.48268e-19	mDC-LAMP3-CCR7-CD80	TNIP2
TRAFD1	1.60534e-23	0.436819	0.389	0.122	2.06639e-19	mDC-LAMP3-CCR7-CD80	TRAFD1
DUSP51	3.10155e-23	1.10671	0.548	0.243	3.99232e-19	mDC-LAMP3-CCR7-CD80	DUSP5
WARS2	9.49102e-23	1.03038	0.624	0.314	1.22168e-18	mDC-LAMP3-CCR7-CD80	WARS
POGLUT1	2.24401e-22	0.513802	0.395	0.129	2.88848e-18	mDC-LAMP3-CCR7-CD80	POGLUT1
GBP4	6.98441e-22	1.05441	0.503	0.231	8.99033e-18	mDC-LAMP3-CCR7-CD80	GBP4
TRADD	8.22924e-22	0.52234	0.529	0.232	1.05927e-17	mDC-LAMP3-CCR7-CD80	TRADD
ST3GAL51	3.59373e-21	0.761106	0.414	0.146	4.62585e-17	mDC-LAMP3-CCR7-CD80	ST3GAL5
KIF2A	1.51426e-20	0.989849	0.49	0.207	1.94915e-16	mDC-LAMP3-CCR7-CD80	KIF2A
RFTN1	4.88134e-20	0.652655	0.471	0.204	6.28327e-16	mDC-LAMP3-CCR7-CD80	RFTN1
PARP14	5.59015e-20	0.909238	0.656	0.377	7.19565e-16	mDC-LAMP3-CCR7-CD80	PARP14
UVRAG	1.57959e-19	0.694044	0.586	0.293	2.03325e-15	mDC-LAMP3-CCR7-CD80	UVRAG
GBP5	1.87422e-19	1.06803	0.395	0.152	2.41249e-15	mDC-LAMP3-CCR7-CD80	GBP5
TAP12	6.21438e-19	0.876579	0.65	0.371	7.99916e-15	mDC-LAMP3-CCR7-CD80	TAP1
LY75	7.18823e-19	0.708089	0.338	0.116	9.25269e-15	mDC-LAMP3-CCR7-CD80	LY75
CERS6	9.02236e-19	0.572153	0.433	0.18	1.16136e-14	mDC-LAMP3-CCR7-CD80	CERS6
SOCS1	1.68425e-18	0.57122	0.497	0.209	2.16796e-14	mDC-LAMP3-CCR7-CD80	SOCS1
CLIC21	1.98604e-18	0.593958	0.465	0.198	2.55643e-14	mDC-LAMP3-CCR7-CD80	CLIC2
TMSB102	1.14002e-17	0.480328	0.955	0.936	1.46744e-13	mDC-LAMP3-CCR7-CD80	TMSB10
NFKB2	1.47414e-17	0.526453	0.561	0.261	1.89751e-13	mDC-LAMP3-CCR7-CD80	NFKB2
RAB9A	1.81285e-17	0.654942	0.446	0.192	2.33351e-13	mDC-LAMP3-CCR7-CD80	RAB9A
H6PD	2.3016e-17	0.345009	0.331	0.108	2.96262e-13	mDC-LAMP3-CCR7-CD80	H6PD
MCOLN21	2.41579e-17	0.496727	0.42	0.163	3.1096e-13	mDC-LAMP3-CCR7-CD80	MCOLN2
STAT1	2.72232e-17	0.73741	0.637	0.371	3.50417e-13	mDC-LAMP3-CCR7-CD80	STAT1
ZC3H7A	5.68617e-17	0.596978	0.465	0.208	7.31924e-13	mDC-LAMP3-CCR7-CD80	ZC3H7A
RASSF4	5.89112e-17	0.893844	0.662	0.473	7.58305e-13	mDC-LAMP3-CCR7-CD80	RASSF4
MED13L	7.39503e-17	0.436528	0.573	0.29	9.51888e-13	mDC-LAMP3-CCR7-CD80	MED13L
PPM1K	7.97421e-17	0.70328	0.408	0.168	1.02644e-12	mDC-LAMP3-CCR7-CD80	PPM1K
TUBB6	1.08026e-16	0.557265	0.376	0.143	1.39051e-12	mDC-LAMP3-CCR7-CD80	TUBB6
EBI3	2.01524e-16	1.34217	0.503	0.254	2.59402e-12	mDC-LAMP3-CCR7-CD80	EBI3
PTPN1	2.31585e-16	0.642183	0.758	0.554	2.98097e-12	mDC-LAMP3-CCR7-CD80	PTPN1
PPA12	2.3924e-16	1.05226	0.745	0.621	3.0795e-12	mDC-LAMP3-CCR7-CD80	PPA1
VOPP1	2.57371e-16	0.588892	0.662	0.44	3.31287e-12	mDC-LAMP3-CCR7-CD80	VOPP1
NRP2	3.98885e-16	0.482598	0.369	0.137	5.13445e-12	mDC-LAMP3-CCR7-CD80	NRP2
TMEM176A	7.44606e-16	0.988632	0.465	0.227	9.58456e-12	mDC-LAMP3-CCR7-CD80	TMEM176A
KDM2B	7.91237e-16	0.551189	0.389	0.157	1.01848e-11	mDC-LAMP3-CCR7-CD80	KDM2B
SLC41A2	1.13208e-15	0.33689	0.318	0.11	1.45722e-11	mDC-LAMP3-CCR7-CD80	SLC41A2
TBC1D4	1.93725e-15	0.491488	0.331	0.123	2.49363e-11	mDC-LAMP3-CCR7-CD80	TBC1D4
FAM49A	2.23691e-15	0.608983	0.631	0.37	2.87935e-11	mDC-LAMP3-CCR7-CD80	FAM49A
SPPL2A	2.71642e-15	0.578595	0.554	0.307	3.49658e-11	mDC-LAMP3-CCR7-CD80	SPPL2A
IL2RG	2.96473e-15	0.385116	0.497	0.244	3.8162e-11	mDC-LAMP3-CCR7-CD80	IL2RG
MYO1G	4.11902e-15	0.393066	0.522	0.265	5.30201e-11	mDC-LAMP3-CCR7-CD80	MYO1G
RAP2B	4.29147e-15	0.742036	0.529	0.293	5.52398e-11	mDC-LAMP3-CCR7-CD80	RAP2B
EPSTI1	1.45764e-14	0.835683	0.643	0.398	1.87628e-10	mDC-LAMP3-CCR7-CD80	EPSTI1
AUTS2	1.93e-14	0.384018	0.261	0.085	2.48429e-10	mDC-LAMP3-CCR7-CD80	AUTS2
CFLAR	2.26489e-14	0.726722	0.745	0.611	2.91537e-10	mDC-LAMP3-CCR7-CD80	CFLAR
STAT5A	4.47024e-14	0.333055	0.427	0.181	5.75409e-10	mDC-LAMP3-CCR7-CD80	STAT5A
ATF51	5.23831e-14	0.531817	0.529	0.292	6.74276e-10	mDC-LAMP3-CCR7-CD80	ATF5
CBLB	6.4977e-14	0.535106	0.299	0.109	8.36384e-10	mDC-LAMP3-CCR7-CD80	CBLB
LAP3	8.0403e-14	0.759881	0.72	0.585	1.03495e-09	mDC-LAMP3-CCR7-CD80	LAP3
PTGES2	1.08132e-13	0.424742	0.484	0.245	1.39188e-09	mDC-LAMP3-CCR7-CD80	PTGES2
LMNB1	1.17402e-13	0.408788	0.395	0.169	1.5112e-09	mDC-LAMP3-CCR7-CD80	LMNB1
KYNU	1.37777e-13	0.469736	0.58	0.343	1.77347e-09	mDC-LAMP3-CCR7-CD80	KYNU
REPIN11	1.40381e-13	0.501888	0.408	0.189	1.80699e-09	mDC-LAMP3-CCR7-CD80	REPIN1
CCNG2	1.81657e-13	0.427846	0.331	0.129	2.33829e-09	mDC-LAMP3-CCR7-CD80	CCNG2
CHD3	3.09245e-13	0.388833	0.408	0.185	3.9806e-09	mDC-LAMP3-CCR7-CD80	CHD3
ATOX1	3.14798e-13	0.701868	0.662	0.454	4.05208e-09	mDC-LAMP3-CCR7-CD80	ATOX1
BTN2A21	3.86405e-13	0.410734	0.427	0.198	4.9738e-09	mDC-LAMP3-CCR7-CD80	BTN2A2
ST8SIA4	7.72778e-13	0.441546	0.561	0.312	9.94719e-09	mDC-LAMP3-CCR7-CD80	ST8SIA4
CD381	2.08749e-12	0.544388	0.395	0.178	2.68701e-08	mDC-LAMP3-CCR7-CD80	CD38
TAPBP1	2.25788e-12	0.490732	0.72	0.545	2.90634e-08	mDC-LAMP3-CCR7-CD80	TAPBP
NECAP2	4.06521e-12	0.529349	0.522	0.298	5.23273e-08	mDC-LAMP3-CCR7-CD80	NECAP2
FNBP11	4.25165e-12	0.708832	0.669	0.483	5.47272e-08	mDC-LAMP3-CCR7-CD80	FNBP1
MAPK8	4.46817e-12	0.34208	0.287	0.109	5.75142e-08	mDC-LAMP3-CCR7-CD80	MAPK8
BLVRA	4.47599e-12	0.402696	0.459	0.242	5.76149e-08	mDC-LAMP3-CCR7-CD80	BLVRA
ZBTB10	5.28832e-12	0.322507	0.28	0.107	6.80712e-08	mDC-LAMP3-CCR7-CD80	ZBTB10
CYB5A	6.0594e-12	0.329534	0.363	0.161	7.79966e-08	mDC-LAMP3-CCR7-CD80	CYB5A
RUFY3	8.636e-12	0.596334	0.414	0.212	1.11163e-07	mDC-LAMP3-CCR7-CD80	RUFY3
APOBEC3G	8.92253e-12	0.513888	0.452	0.234	1.14851e-07	mDC-LAMP3-CCR7-CD80	APOBEC3G
GBP2	1.04532e-11	0.517498	0.611	0.396	1.34553e-07	mDC-LAMP3-CCR7-CD80	GBP2
TMEM131	1.18037e-11	0.506727	0.427	0.222	1.51937e-07	mDC-LAMP3-CCR7-CD80	TMEM131
ZMIZ2	5.15972e-11	0.422931	0.318	0.13	6.64159e-07	mDC-LAMP3-CCR7-CD80	ZMIZ2
SINHCAF	5.38087e-11	0.454871	0.427	0.221	6.92625e-07	mDC-LAMP3-CCR7-CD80	SINHCAF
CD80	7.72805e-11	0.365434	0.312	0.132	9.94754e-07	mDC-LAMP3-CCR7-CD80	CD80
GPR137B	8.18595e-11	0.40471	0.471	0.261	1.0537e-06	mDC-LAMP3-CCR7-CD80	GPR137B
TTYH2	8.92498e-11	0.358392	0.268	0.104	1.14882e-06	mDC-LAMP3-CCR7-CD80	TTYH2
ETV61	1.14901e-10	0.422206	0.592	0.391	1.47901e-06	mDC-LAMP3-CCR7-CD80	ETV6
DNAJB14	2.02109e-10	0.339588	0.452	0.234	2.60155e-06	mDC-LAMP3-CCR7-CD80	DNAJB14
ACTB1	2.52399e-10	0.476912	0.962	0.936	3.24888e-06	mDC-LAMP3-CCR7-CD80	ACTB
GLIPR2	3.25159e-10	0.501158	0.529	0.332	4.18545e-06	mDC-LAMP3-CCR7-CD80	GLIPR2
TSPAN33	3.31415e-10	0.395171	0.401	0.205	4.26598e-06	mDC-LAMP3-CCR7-CD80	TSPAN33
SAMD9L	6.80007e-10	0.341449	0.465	0.256	8.75305e-06	mDC-LAMP3-CCR7-CD80	SAMD9L
MVP	7.40541e-10	0.367834	0.58	0.349	9.53225e-06	mDC-LAMP3-CCR7-CD80	MVP
SMG1	7.43739e-10	0.469207	0.516	0.321	9.57341e-06	mDC-LAMP3-CCR7-CD80	SMG1
USP12	8.62144e-10	0.333478	0.363	0.172	1.10975e-05	mDC-LAMP3-CCR7-CD80	USP12
ARHGAP22	1.1449e-09	0.410179	0.389	0.191	1.47372e-05	mDC-LAMP3-CCR7-CD80	ARHGAP22
TYMP	1.33361e-09	0.491087	0.809	0.745	1.71663e-05	mDC-LAMP3-CCR7-CD80	TYMP
SELENOS	1.39745e-09	0.371805	0.618	0.41	1.7988e-05	mDC-LAMP3-CCR7-CD80	SELENOS
CBX61	1.5153e-09	0.333951	0.363	0.176	1.9505e-05	mDC-LAMP3-CCR7-CD80	CBX6
PSME21	1.63469e-09	0.667102	0.707	0.652	2.10418e-05	mDC-LAMP3-CCR7-CD80	PSME2
IL10RA	1.70761e-09	0.398136	0.618	0.438	2.19804e-05	mDC-LAMP3-CCR7-CD80	IL10RA
WDR33	2.06755e-09	0.385362	0.522	0.31	2.66135e-05	mDC-LAMP3-CCR7-CD80	WDR33
SEC61B	2.35204e-09	0.553238	0.745	0.676	3.02755e-05	mDC-LAMP3-CCR7-CD80	SEC61B
TMEM176B	3.00473e-09	0.720107	0.522	0.345	3.86768e-05	mDC-LAMP3-CCR7-CD80	TMEM176B
TUBB	3.04868e-09	0.663707	0.752	0.606	3.92426e-05	mDC-LAMP3-CCR7-CD80	TUBB
FAM129A	3.3421e-09	0.450966	0.561	0.348	4.30195e-05	mDC-LAMP3-CCR7-CD80	FAM129A
CRIP1	3.83813e-09	0.769007	0.318	0.156	4.94044e-05	mDC-LAMP3-CCR7-CD80	CRIP1
ANKRD22	3.87303e-09	0.504521	0.471	0.279	4.98536e-05	mDC-LAMP3-CCR7-CD80	ANKRD22
GADD45A	4.78935e-09	0.938475	0.268	0.123	6.16486e-05	mDC-LAMP3-CCR7-CD80	GADD45A
PCNX1	4.79527e-09	0.362301	0.369	0.184	6.17247e-05	mDC-LAMP3-CCR7-CD80	PCNX1
RNF213	4.8574e-09	0.481781	0.605	0.465	6.25244e-05	mDC-LAMP3-CCR7-CD80	RNF213
MAP3K131	5.44805e-09	0.543458	0.51	0.304	7.01273e-05	mDC-LAMP3-CCR7-CD80	MAP3K13
GRSF1	5.71366e-09	0.696357	0.478	0.296	7.35462e-05	mDC-LAMP3-CCR7-CD80	GRSF1
LYST	5.83358e-09	0.544666	0.414	0.243	7.50898e-05	mDC-LAMP3-CCR7-CD80	LYST
PITPNA1	6.82705e-09	0.367304	0.427	0.236	8.78778e-05	mDC-LAMP3-CCR7-CD80	PITPNA
SUB11	7.00359e-09	0.366165	0.783	0.727	9.01503e-05	mDC-LAMP3-CCR7-CD80	SUB1
EHD1	7.63918e-09	0.5323	0.325	0.151	9.83316e-05	mDC-LAMP3-CCR7-CD80	EHD1
GABARAPL2	1.14213e-08	0.575452	0.713	0.607	0.000147016	mDC-LAMP3-CCR7-CD80	GABARAPL2
HLA-F1	1.24004e-08	0.420583	0.624	0.475	0.000159618	mDC-LAMP3-CCR7-CD80	HLA-F
ACTG12	1.4904e-08	0.374257	0.892	0.849	0.000191844	mDC-LAMP3-CCR7-CD80	ACTG1
JAK1	1.55515e-08	0.588569	0.631	0.488	0.000200178	mDC-LAMP3-CCR7-CD80	JAK1
VAMP5	2.15303e-08	0.582938	0.586	0.433	0.000277138	mDC-LAMP3-CCR7-CD80	VAMP5
LSP12	2.36516e-08	0.551465	0.739	0.631	0.000304444	mDC-LAMP3-CCR7-CD80	LSP1
MLLT6	2.418e-08	0.374988	0.338	0.168	0.000311245	mDC-LAMP3-CCR7-CD80	MLLT6
ANKRD121	2.88221e-08	0.448356	0.624	0.483	0.000370998	mDC-LAMP3-CCR7-CD80	ANKRD12
ANXA7	2.96804e-08	0.493979	0.573	0.416	0.000382046	mDC-LAMP3-CCR7-CD80	ANXA7
SOD2	3.02581e-08	0.655791	0.694	0.561	0.000389483	mDC-LAMP3-CCR7-CD80	SOD2
NABP11	3.91832e-08	0.829443	0.561	0.398	0.000504366	mDC-LAMP3-CCR7-CD80	NABP1
UGCG	4.61413e-08	0.593415	0.433	0.267	0.00059393	mDC-LAMP3-CCR7-CD80	UGCG
SYNGR2	4.75293e-08	0.633639	0.752	0.636	0.000611797	mDC-LAMP3-CCR7-CD80	SYNGR2
COMMD1	5.52429e-08	0.549647	0.49	0.31	0.000711087	mDC-LAMP3-CCR7-CD80	COMMD1
BCL2L111	6.7152e-08	0.377049	0.414	0.234	0.000864381	mDC-LAMP3-CCR7-CD80	BCL2L11
ARID1B	7.59087e-08	0.43692	0.465	0.294	0.000977097	mDC-LAMP3-CCR7-CD80	ARID1B
RAB8B1	8.46827e-08	0.484606	0.465	0.302	0.00109004	mDC-LAMP3-CCR7-CD80	RAB8B
TUBA1C	9.45598e-08	0.674949	0.58	0.421	0.00121717	mDC-LAMP3-CCR7-CD80	TUBA1C
CFP1	9.80777e-08	0.38862	0.268	0.123	0.00126246	mDC-LAMP3-CCR7-CD80	CFP
PLAGL1	9.81056e-08	0.334261	0.344	0.179	0.00126282	mDC-LAMP3-CCR7-CD80	PLAGL1
TNFAIP8	1.01399e-07	0.460514	0.51	0.35	0.00130521	mDC-LAMP3-CCR7-CD80	TNFAIP8
GSTP11	1.13466e-07	0.672915	0.815	0.739	0.00146053	mDC-LAMP3-CCR7-CD80	GSTP1
PSMB91	1.14569e-07	0.527191	0.701	0.554	0.00147474	mDC-LAMP3-CCR7-CD80	PSMB9
ISCU	1.28623e-07	0.43052	0.643	0.488	0.00165564	mDC-LAMP3-CCR7-CD80	ISCU
STK4	1.29976e-07	0.561917	0.65	0.557	0.00167306	mDC-LAMP3-CCR7-CD80	STK4
LCP12	1.60116e-07	0.480654	0.694	0.607	0.00206102	mDC-LAMP3-CCR7-CD80	LCP1
RHOF1	1.7602e-07	0.360948	0.369	0.205	0.00226573	mDC-LAMP3-CCR7-CD80	RHOF
TNIP1	2.19112e-07	0.65605	0.471	0.299	0.00282041	mDC-LAMP3-CCR7-CD80	TNIP1
CDKN1A	2.45963e-07	0.523472	0.701	0.578	0.00316603	mDC-LAMP3-CCR7-CD80	CDKN1A
ADAM8	2.90732e-07	0.403325	0.382	0.213	0.0037423	mDC-LAMP3-CCR7-CD80	ADAM8
C12orf451	2.91336e-07	0.54342	0.471	0.304	0.00375008	mDC-LAMP3-CCR7-CD80	C12orf45
PITPNB	3.27056e-07	0.37438	0.382	0.215	0.00420987	mDC-LAMP3-CCR7-CD80	PITPNB
CST72	3.70126e-07	0.504715	0.446	0.285	0.00476426	mDC-LAMP3-CCR7-CD80	CST7
EFHD21	3.75551e-07	0.584394	0.643	0.503	0.00483409	mDC-LAMP3-CCR7-CD80	EFHD2
ERICH1	4.00858e-07	0.426388	0.516	0.358	0.00515984	mDC-LAMP3-CCR7-CD80	ERICH1
MARCKS	5.48166e-07	0.378271	0.707	0.554	0.00705599	mDC-LAMP3-CCR7-CD80	MARCKS
ASMTL	5.58292e-07	0.471345	0.306	0.161	0.00718634	mDC-LAMP3-CCR7-CD80	ASMTL
NET11	6.02845e-07	0.335967	0.357	0.198	0.00775983	mDC-LAMP3-CCR7-CD80	NET1
CCL5	6.07402e-07	0.462421	0.287	0.142	0.00781848	mDC-LAMP3-CCR7-CD80	CCL5
CDC42SE2	6.30021e-07	0.367915	0.529	0.384	0.00810963	mDC-LAMP3-CCR7-CD80	CDC42SE2
PHKB	6.41054e-07	0.359897	0.338	0.186	0.00825165	mDC-LAMP3-CCR7-CD80	PHKB
GCH1	6.57749e-07	0.328072	0.255	0.121	0.00846655	mDC-LAMP3-CCR7-CD80	GCH1
RAB10	7.64028e-07	0.356479	0.548	0.396	0.00983456	mDC-LAMP3-CCR7-CD80	RAB10
LPP1	8.30741e-07	0.422864	0.408	0.25	0.0106933	mDC-LAMP3-CCR7-CD80	LPP
GPX4	9.78148e-07	0.433758	0.783	0.758	0.0125907	mDC-LAMP3-CCR7-CD80	GPX4
GPBP1	1.09086e-06	0.396598	0.58	0.451	0.0140415	mDC-LAMP3-CCR7-CD80	GPBP1
PMAIP1	1.16938e-06	0.791731	0.471	0.333	0.0150523	mDC-LAMP3-CCR7-CD80	PMAIP1
TANK	1.2108e-06	0.341222	0.529	0.365	0.0155855	mDC-LAMP3-CCR7-CD80	TANK
NECTIN2	1.31327e-06	0.484718	0.516	0.357	0.0169044	mDC-LAMP3-CCR7-CD80	NECTIN2
RARRES3	1.33689e-06	0.535493	0.51	0.382	0.0172084	mDC-LAMP3-CCR7-CD80	RARRES3
DRAM1	1.33746e-06	0.371381	0.293	0.153	0.0172157	mDC-LAMP3-CCR7-CD80	DRAM1
CYTH1	1.36118e-06	0.324576	0.516	0.363	0.0175211	mDC-LAMP3-CCR7-CD80	CYTH1
KDM2A	1.58766e-06	0.329841	0.446	0.289	0.0204364	mDC-LAMP3-CCR7-CD80	KDM2A
LRRK1	1.75998e-06	0.473679	0.389	0.232	0.0226545	mDC-LAMP3-CCR7-CD80	LRRK1
FAM107B	1.76353e-06	0.335268	0.433	0.276	0.0227001	mDC-LAMP3-CCR7-CD80	FAM107B
RAP1B	2.0867e-06	0.33512	0.669	0.565	0.02686	mDC-LAMP3-CCR7-CD80	RAP1B
TIMM17A	2.23683e-06	0.428766	0.459	0.288	0.0287925	mDC-LAMP3-CCR7-CD80	TIMM17A
STAT3	2.7709e-06	0.344545	0.65	0.505	0.0356671	mDC-LAMP3-CCR7-CD80	STAT3
TAP21	3.11305e-06	0.361785	0.389	0.243	0.0400712	mDC-LAMP3-CCR7-CD80	TAP2
ARL6IP5	4.04433e-06	0.384146	0.701	0.613	0.0520586	mDC-LAMP3-CCR7-CD80	ARL6IP5
KLHL6	4.74529e-06	0.554727	0.503	0.341	0.0610814	mDC-LAMP3-CCR7-CD80	KLHL6
BZW1	5.41248e-06	0.528308	0.605	0.498	0.0696694	mDC-LAMP3-CCR7-CD80	BZW1
CCDC32	5.64561e-06	0.363553	0.312	0.171	0.0726703	mDC-LAMP3-CCR7-CD80	CCDC32
CTSH	6.9882e-06	0.405541	0.764	0.697	0.0899521	mDC-LAMP3-CCR7-CD80	CTSH
SMARCA5	7.22955e-06	0.373784	0.529	0.388	0.0930588	mDC-LAMP3-CCR7-CD80	SMARCA5
PML	7.36402e-06	0.340866	0.338	0.197	0.0947897	mDC-LAMP3-CCR7-CD80	PML
KLF7	8.45051e-06	0.532481	0.299	0.171	0.108775	mDC-LAMP3-CCR7-CD80	KLF7
PHPT1	1.02644e-05	0.349482	0.586	0.471	0.132124	mDC-LAMP3-CCR7-CD80	PHPT1
CTSZ	1.09404e-05	0.322964	0.732	0.663	0.140824	mDC-LAMP3-CCR7-CD80	CTSZ
CEP350	1.31768e-05	0.396181	0.497	0.355	0.169612	mDC-LAMP3-CCR7-CD80	CEP350
MALT1	1.33817e-05	0.583332	0.49	0.346	0.172249	mDC-LAMP3-CCR7-CD80	MALT1
ANXA61	1.48554e-05	0.528545	0.331	0.215	0.191218	mDC-LAMP3-CCR7-CD80	ANXA6
SPPL3	1.56444e-05	0.349082	0.287	0.165	0.201374	mDC-LAMP3-CCR7-CD80	SPPL3
H2AFZ	1.64574e-05	0.474628	0.707	0.633	0.21184	mDC-LAMP3-CCR7-CD80	H2AFZ
SRSF11	1.67782e-05	0.392077	0.675	0.545	0.215968	mDC-LAMP3-CCR7-CD80	SRSF11
KCNMA1	1.67875e-05	0.463126	0.274	0.153	0.216088	mDC-LAMP3-CCR7-CD80	KCNMA1
SMCO42	1.72653e-05	0.358901	0.497	0.332	0.222239	mDC-LAMP3-CCR7-CD80	SMCO4
SLC38A11	1.83823e-05	0.333648	0.325	0.199	0.236617	mDC-LAMP3-CCR7-CD80	SLC38A1
IRF41	1.86681e-05	0.352701	0.255	0.139	0.240295	mDC-LAMP3-CCR7-CD80	IRF4
PSMB4	1.92417e-05	0.33451	0.567	0.425	0.247679	mDC-LAMP3-CCR7-CD80	PSMB4
PSMB81	2.32506e-05	0.339395	0.618	0.519	0.299282	mDC-LAMP3-CCR7-CD80	PSMB8
PDIA3	2.33501e-05	0.361906	0.707	0.682	0.300562	mDC-LAMP3-CCR7-CD80	PDIA3
PFN11	2.76537e-05	0.350056	0.885	0.815	0.355959	mDC-LAMP3-CCR7-CD80	PFN1
NADK	3.11414e-05	0.352313	0.274	0.148	0.400852	mDC-LAMP3-CCR7-CD80	NADK
NDUFV2	5.24729e-05	0.331077	0.675	0.577	0.675431	mDC-LAMP3-CCR7-CD80	NDUFV2
MDM2	5.50424e-05	0.32767	0.382	0.248	0.708506	mDC-LAMP3-CCR7-CD80	MDM2
GRINA	8.84272e-05	0.351331	0.65	0.566	1	mDC-LAMP3-CCR7-CD80	GRINA
GLS	0.000101012	0.475874	0.503	0.384	1	mDC-LAMP3-CCR7-CD80	GLS
FOXP1	0.000142908	0.400904	0.497	0.374	1	mDC-LAMP3-CCR7-CD80	FOXP1
F11R	0.000146804	0.339296	0.268	0.153	1	mDC-LAMP3-CCR7-CD80	F11R
HLA-A	0.000182227	0.329531	0.841	0.882	1	mDC-LAMP3-CCR7-CD80	HLA-A
C15orf48	0.000199566	0.521989	0.471	0.352	1	mDC-LAMP3-CCR7-CD80	C15orf48
SMC4	0.000203402	0.325168	0.306	0.188	1	mDC-LAMP3-CCR7-CD80	SMC4
DUSP41	0.000208131	0.436601	0.497	0.373	1	mDC-LAMP3-CCR7-CD80	DUSP4
SMARCA2	0.000225521	0.35177	0.503	0.387	1	mDC-LAMP3-CCR7-CD80	SMARCA2
YTHDC2	0.000244585	0.342053	0.306	0.184	1	mDC-LAMP3-CCR7-CD80	YTHDC2
MALAT1	0.000250956	0.383675	0.994	0.992	1	mDC-LAMP3-CCR7-CD80	MALAT1
TRIP12	0.000262828	0.333267	0.484	0.344	1	mDC-LAMP3-CCR7-CD80	TRIP12
PUM3	0.000272175	0.378243	0.268	0.161	1	mDC-LAMP3-CCR7-CD80	PUM3
ACTR10	0.000342304	0.482972	0.338	0.212	1	mDC-LAMP3-CCR7-CD80	ACTR10
AFF1	0.000408878	0.331639	0.325	0.215	1	mDC-LAMP3-CCR7-CD80	AFF1
CSF2RA	0.000416476	0.37207	0.656	0.649	1	mDC-LAMP3-CCR7-CD80	CSF2RA
PSMA7	0.000441468	0.389598	0.745	0.684	1	mDC-LAMP3-CCR7-CD80	PSMA7
WDR1	0.000446707	0.467395	0.599	0.504	1	mDC-LAMP3-CCR7-CD80	WDR1
MYH9	0.000526469	0.36499	0.65	0.535	1	mDC-LAMP3-CCR7-CD80	MYH9
NSD1	0.000607636	0.387572	0.363	0.249	1	mDC-LAMP3-CCR7-CD80	NSD1
MDH1	0.000769918	0.385707	0.535	0.399	1	mDC-LAMP3-CCR7-CD80	MDH1
CCDC186	0.00107732	0.445042	0.255	0.159	1	mDC-LAMP3-CCR7-CD80	CCDC186
PHIP	0.00130245	0.329942	0.452	0.355	1	mDC-LAMP3-CCR7-CD80	PHIP
TUBGCP2	0.00138786	0.356478	0.471	0.341	1	mDC-LAMP3-CCR7-CD80	TUBGCP2
RNASEH2B	0.00208806	0.324869	0.433	0.32	1	mDC-LAMP3-CCR7-CD80	RNASEH2B
UBE2F	0.00217825	0.361194	0.446	0.332	1	mDC-LAMP3-CCR7-CD80	UBE2F
SRGAP2	0.00226664	0.397133	0.554	0.433	1	mDC-LAMP3-CCR7-CD80	SRGAP2
WBP4	0.00259797	0.331243	0.338	0.235	1	mDC-LAMP3-CCR7-CD80	WBP4
SERPINB11	0.00330142	0.676819	0.662	0.64	1	mDC-LAMP3-CCR7-CD80	SERPINB1
NEMF	0.00686843	0.361712	0.446	0.364	1	mDC-LAMP3-CCR7-CD80	NEMF
PPIL4	0.0077131	0.48854	0.325	0.23	1	mDC-LAMP3-CCR7-CD80	PPIL4
NSFL1C	0.00850332	0.468101	0.369	0.268	1	mDC-LAMP3-CCR7-CD80	NSFL1C
FCER1A1	2.34126e-45	0.628924	0.567	0.253	3.01367e-41	Mo-DC1-CD14-FCER1A-CD1C-CLEC10A	FCER1A
AREG	3.73147e-43	0.620898	0.86	0.61	4.80315e-39	Mo-DC1-CD14-FCER1A-CD1C-CLEC10A	AREG
S100A4	5.24093e-37	0.456521	0.848	0.624	6.74612e-33	Mo-DC1-CD14-FCER1A-CD1C-CLEC10A	S100A4
SRGN	7.34646e-34	0.396119	0.976	0.89	9.45636e-30	Mo-DC1-CD14-FCER1A-CD1C-CLEC10A	SRGN
S100A6	9.6058e-32	0.376887	0.858	0.665	1.23646e-27	Mo-DC1-CD14-FCER1A-CD1C-CLEC10A	S100A6
LST1	2.44079e-31	0.392919	0.872	0.667	3.14178e-27	Mo-DC1-CD14-FCER1A-CD1C-CLEC10A	LST1
CLEC10A	2.54876e-31	0.500863	0.436	0.204	3.28076e-27	Mo-DC1-CD14-FCER1A-CD1C-CLEC10A	CLEC10A
GPR183	1.6375e-30	0.367292	0.9	0.692	2.10779e-26	Mo-DC1-CD14-FCER1A-CD1C-CLEC10A	GPR183
SELENOK	7.30688e-29	0.505897	0.797	0.606	9.40542e-25	Mo-DC1-CD14-FCER1A-CD1C-CLEC10A	SELENOK
HCST	3.25594e-28	0.379768	0.823	0.606	4.19105e-24	Mo-DC1-CD14-FCER1A-CD1C-CLEC10A	HCST
PLAC81	6.22217e-28	0.504113	0.54	0.31	8.00917e-24	Mo-DC1-CD14-FCER1A-CD1C-CLEC10A	PLAC8
RILPL2	3.88678e-26	0.323391	0.806	0.604	5.00306e-22	Mo-DC1-CD14-FCER1A-CD1C-CLEC10A	RILPL2
HERPUD1	1.2967e-25	0.384258	0.919	0.772	1.66911e-21	Mo-DC1-CD14-FCER1A-CD1C-CLEC10A	HERPUD1
NLRP3	3.1455e-25	0.458982	0.701	0.479	4.04889e-21	Mo-DC1-CD14-FCER1A-CD1C-CLEC10A	NLRP3
IL1R21	8.44913e-25	0.628649	0.357	0.167	1.08757e-20	Mo-DC1-CD14-FCER1A-CD1C-CLEC10A	IL1R2
JAML1	7.25094e-22	0.325251	0.59	0.36	9.33341e-18	Mo-DC1-CD14-FCER1A-CD1C-CLEC10A	JAML
CXCR4	1.4478e-21	0.353513	0.904	0.751	1.86361e-17	Mo-DC1-CD14-FCER1A-CD1C-CLEC10A	CXCR4
CYTIP	4.63452e-21	0.375804	0.656	0.447	5.96556e-17	Mo-DC1-CD14-FCER1A-CD1C-CLEC10A	CYTIP
OGFRL1	7.55475e-21	0.400351	0.745	0.535	9.72448e-17	Mo-DC1-CD14-FCER1A-CD1C-CLEC10A	OGFRL1
SYAP1	1.52643e-20	0.324347	0.739	0.551	1.96482e-16	Mo-DC1-CD14-FCER1A-CD1C-CLEC10A	SYAP1
ALOX5AP	8.75329e-20	0.33612	0.845	0.624	1.12672e-15	Mo-DC1-CD14-FCER1A-CD1C-CLEC10A	ALOX5AP
TIMP11	1.83972e-19	0.492659	0.725	0.539	2.36809e-15	Mo-DC1-CD14-FCER1A-CD1C-CLEC10A	TIMP1
EZR	1.31875e-17	0.35153	0.686	0.503	1.6975e-13	Mo-DC1-CD14-FCER1A-CD1C-CLEC10A	EZR
INSIG1	2.84007e-16	0.347221	0.549	0.376	3.65574e-12	Mo-DC1-CD14-FCER1A-CD1C-CLEC10A	INSIG1
CD1C1	9.05841e-16	0.330646	0.255	0.12	1.166e-11	Mo-DC1-CD14-FCER1A-CD1C-CLEC10A	CD1C
PMAIP11	3.65398e-15	0.326825	0.481	0.309	4.7034e-11	Mo-DC1-CD14-FCER1A-CD1C-CLEC10A	PMAIP1
CST73	3.57581e-13	0.362358	0.423	0.265	4.60278e-09	Mo-DC1-CD14-FCER1A-CD1C-CLEC10A	CST7
BID1	4.18193e-13	0.329684	0.64	0.468	5.38298e-09	Mo-DC1-CD14-FCER1A-CD1C-CLEC10A	BID
C15orf481	2.47015e-12	0.411422	0.481	0.331	3.17958e-08	Mo-DC1-CD14-FCER1A-CD1C-CLEC10A	C15orf48
BCL2A1	9.509e-12	0.325532	0.702	0.546	1.224e-07	Mo-DC1-CD14-FCER1A-CD1C-CLEC10A	BCL2A1
CXCL8	3.97176e-11	0.449512	0.508	0.361	5.11244e-07	Mo-DC1-CD14-FCER1A-CD1C-CLEC10A	CXCL8
G0S2	0.000181053	0.325471	0.381	0.298	1	Mo-DC1-CD14-FCER1A-CD1C-CLEC10A	G0S2
C5AR1	1.14041e-79	0.831539	0.776	0.339	1.46793e-75	Mo-DC2-CD14-C1QA-CD141	C5AR1
SAT1	1.95895e-56	0.496048	0.986	0.953	2.52156e-52	Mo-DC2-CD14-C1QA-CD141	SAT1
OLR1	1.07807e-53	0.71186	0.839	0.528	1.38769e-49	Mo-DC2-CD14-C1QA-CD141	OLR1
ELL2	5.40745e-52	0.446317	0.764	0.42	6.96047e-48	Mo-DC2-CD14-C1QA-CD141	ELL2
VEGFA	4.72719e-51	0.637718	0.709	0.336	6.08485e-47	Mo-DC2-CD14-C1QA-CD141	VEGFA
PLAUR	2.27233e-49	0.557132	0.916	0.658	2.92495e-45	Mo-DC2-CD14-C1QA-CD141	PLAUR
CREM	5.41332e-49	0.64482	0.839	0.555	6.96803e-45	Mo-DC2-CD14-C1QA-CD141	CREM
PHLDA1	1.00774e-47	0.499235	0.49	0.182	1.29716e-43	Mo-DC2-CD14-C1QA-CD141	PHLDA1
CD14	1.11082e-47	0.705216	0.839	0.52	1.42985e-43	Mo-DC2-CD14-C1QA-CD141	CD14
MSR1	3.40232e-47	0.523878	0.726	0.385	4.37947e-43	Mo-DC2-CD14-C1QA-CD141	MSR1
SLC11A1	9.83375e-45	0.413609	0.764	0.429	1.2658e-40	Mo-DC2-CD14-C1QA-CD141	SLC11A1
SRGN1	6.37549e-44	0.475543	0.983	0.893	8.20652e-40	Mo-DC2-CD14-C1QA-CD141	SRGN
THBS1	1.49134e-39	1.12145	0.471	0.199	1.91966e-35	Mo-DC2-CD14-C1QA-CD141	THBS1
TREM1	1.75985e-38	0.428759	0.538	0.243	2.26528e-34	Mo-DC2-CD14-C1QA-CD141	TREM1
RAB20	1.53227e-37	0.401308	0.724	0.428	1.97234e-33	Mo-DC2-CD14-C1QA-CD141	RAB20
TNFRSF12A	3.36895e-37	0.41237	0.341	0.111	4.33651e-33	Mo-DC2-CD14-C1QA-CD141	TNFRSF12A
FTH1	3.92001e-37	0.41944	0.998	0.979	5.04583e-33	Mo-DC2-CD14-C1QA-CD141	FTH1
CTSL	1.19745e-36	0.564578	0.63	0.359	1.54136e-32	Mo-DC2-CD14-C1QA-CD141	CTSL
SLC16A10	2.01291e-36	0.535752	0.317	0.097	2.59101e-32	Mo-DC2-CD14-C1QA-CD141	SLC16A10
ACSL1	5.93119e-36	0.336607	0.76	0.5	7.63463e-32	Mo-DC2-CD14-C1QA-CD141	ACSL1
APOE	1.27619e-35	0.808375	0.906	0.744	1.64271e-31	Mo-DC2-CD14-C1QA-CD141	APOE
HBEGF	1.33213e-35	0.485564	0.695	0.39	1.71472e-31	Mo-DC2-CD14-C1QA-CD141	HBEGF
NINJ1	7.90077e-35	0.443811	0.748	0.488	1.01699e-30	Mo-DC2-CD14-C1QA-CD141	NINJ1
CD163	1.15669e-34	0.344985	0.796	0.518	1.48889e-30	Mo-DC2-CD14-C1QA-CD141	CD163
SDS	1.26112e-34	0.950811	0.399	0.16	1.62331e-30	Mo-DC2-CD14-C1QA-CD141	SDS
MAP2K3	1.40061e-34	0.399032	0.577	0.305	1.80287e-30	Mo-DC2-CD14-C1QA-CD141	MAP2K3
KDM6B	3.3947e-34	0.443466	0.793	0.543	4.36966e-30	Mo-DC2-CD14-C1QA-CD141	KDM6B
SMIM3	1.31268e-33	0.435224	0.505	0.238	1.68969e-29	Mo-DC2-CD14-C1QA-CD141	SMIM3
MMP19	2.57414e-32	0.365928	0.281	0.085	3.31343e-28	Mo-DC2-CD14-C1QA-CD141	MMP19
PDE4B	7.88933e-32	0.425804	0.752	0.496	1.01551e-27	Mo-DC2-CD14-C1QA-CD141	PDE4B
THBD	3.36547e-31	0.496948	0.498	0.241	4.33203e-27	Mo-DC2-CD14-C1QA-CD141	THBD
HIF1A	8.52698e-31	0.335592	0.812	0.578	1.09759e-26	Mo-DC2-CD14-C1QA-CD141	HIF1A
APOC1	1.30545e-30	0.76305	0.832	0.62	1.68037e-26	Mo-DC2-CD14-C1QA-CD141	APOC1
CD63	6.77192e-30	0.363928	0.911	0.776	8.71682e-26	Mo-DC2-CD14-C1QA-CD141	CD63
REL	7.67126e-30	0.571609	0.904	0.744	9.87444e-26	Mo-DC2-CD14-C1QA-CD141	REL
C1QC	1.43267e-29	0.460887	0.868	0.601	1.84413e-25	Mo-DC2-CD14-C1QA-CD141	C1QC
CFD	2.43171e-29	0.647699	0.522	0.275	3.1301e-25	Mo-DC2-CD14-C1QA-CD141	CFD
TNFRSF1B	3.70975e-29	0.393723	0.736	0.503	4.77519e-25	Mo-DC2-CD14-C1QA-CD141	TNFRSF1B
A2M	4.24465e-29	0.450571	0.719	0.443	5.46372e-25	Mo-DC2-CD14-C1QA-CD141	A2M
CD9	4.7936e-29	0.41265	0.656	0.375	6.17033e-25	Mo-DC2-CD14-C1QA-CD141	CD9
FCER1G	3.0329e-28	0.383009	0.94	0.767	3.90395e-24	Mo-DC2-CD14-C1QA-CD141	FCER1G
TREM2	5.27266e-28	0.412238	0.743	0.452	6.78697e-24	Mo-DC2-CD14-C1QA-CD141	TREM2
STX4	6.02378e-28	0.405546	0.608	0.384	7.75381e-24	Mo-DC2-CD14-C1QA-CD141	STX4
CXCL2	2.02268e-27	0.665552	0.365	0.153	2.6036e-23	Mo-DC2-CD14-C1QA-CD141	CXCL2
NFKB1	3.10211e-27	0.484803	0.692	0.454	3.99304e-23	Mo-DC2-CD14-C1QA-CD141	NFKB1
ASAH1	3.7732e-27	0.365662	0.793	0.6	4.85686e-23	Mo-DC2-CD14-C1QA-CD141	ASAH1
CXCL16	7.24244e-27	0.358064	0.885	0.707	9.32247e-23	Mo-DC2-CD14-C1QA-CD141	CXCL16
PDE4DIP	8.608e-27	0.603263	0.435	0.217	1.10802e-22	Mo-DC2-CD14-C1QA-CD141	PDE4DIP
RILPL21	9.13664e-27	0.412721	0.815	0.612	1.17607e-22	Mo-DC2-CD14-C1QA-CD141	RILPL2
PLIN2	1.42506e-26	0.39435	0.745	0.524	1.83434e-22	Mo-DC2-CD14-C1QA-CD141	PLIN2
RASGEF1B	1.53515e-26	0.413524	0.649	0.396	1.97604e-22	Mo-DC2-CD14-C1QA-CD141	RASGEF1B
TGIF1	1.5394e-26	0.373204	0.63	0.387	1.98151e-22	Mo-DC2-CD14-C1QA-CD141	TGIF1
CTNNB1	7.98235e-26	0.468966	0.675	0.467	1.02749e-21	Mo-DC2-CD14-C1QA-CD141	CTNNB1
IER3	2.50243e-25	0.400126	0.849	0.614	3.22112e-21	Mo-DC2-CD14-C1QA-CD141	IER3
SNX9	3.29954e-25	0.410068	0.562	0.339	4.24716e-21	Mo-DC2-CD14-C1QA-CD141	SNX9
CTSB	3.65822e-25	0.328666	0.913	0.776	4.70886e-21	Mo-DC2-CD14-C1QA-CD141	CTSB
SLC3A2	3.87994e-25	0.36507	0.675	0.461	4.99426e-21	Mo-DC2-CD14-C1QA-CD141	SLC3A2
ACSL3	6.33662e-25	0.536113	0.529	0.312	8.1565e-21	Mo-DC2-CD14-C1QA-CD141	ACSL3
AVPI1	8.8806e-25	0.355112	0.413	0.198	1.14311e-20	Mo-DC2-CD14-C1QA-CD141	AVPI1
C3	1.13794e-24	0.442455	0.81	0.565	1.46476e-20	Mo-DC2-CD14-C1QA-CD141	C3
C1QB	1.70493e-24	0.427572	0.892	0.702	2.19458e-20	Mo-DC2-CD14-C1QA-CD141	C1QB
C1QA	2.43609e-24	0.433471	0.897	0.719	3.13574e-20	Mo-DC2-CD14-C1QA-CD141	C1QA
LMNA	2.89397e-24	0.343235	0.591	0.341	3.72512e-20	Mo-DC2-CD14-C1QA-CD141	LMNA
TLR2	1.53944e-23	0.34634	0.678	0.456	1.98156e-19	Mo-DC2-CD14-C1QA-CD141	TLR2
EPB41L3	2.98065e-23	0.331736	0.526	0.302	3.83669e-19	Mo-DC2-CD14-C1QA-CD141	EPB41L3
EIF4E	3.98272e-23	0.497622	0.623	0.41	5.12656e-19	Mo-DC2-CD14-C1QA-CD141	EIF4E
CEBPB	4.26302e-23	0.429999	0.791	0.595	5.48736e-19	Mo-DC2-CD14-C1QA-CD141	CEBPB
NRP21	5.5955e-23	0.444405	0.305	0.124	7.20253e-19	Mo-DC2-CD14-C1QA-CD141	NRP2
SLC43A2	1.03091e-22	0.410783	0.579	0.369	1.32698e-18	Mo-DC2-CD14-C1QA-CD141	SLC43A2
CPM	1.91753e-22	0.408573	0.567	0.346	2.46825e-18	Mo-DC2-CD14-C1QA-CD141	CPM
PSAP	2.57079e-22	0.339717	0.928	0.801	3.30913e-18	Mo-DC2-CD14-C1QA-CD141	PSAP
VMO11	3.24678e-22	0.431798	0.555	0.319	4.17925e-18	Mo-DC2-CD14-C1QA-CD141	VMO1
FPR1	4.03131e-22	0.359289	0.764	0.542	5.1891e-18	Mo-DC2-CD14-C1QA-CD141	FPR1
TFRC	5.65402e-22	0.534088	0.512	0.307	7.27785e-18	Mo-DC2-CD14-C1QA-CD141	TFRC
SLC1A3	7.09891e-22	0.358541	0.649	0.433	9.13771e-18	Mo-DC2-CD14-C1QA-CD141	SLC1A3
ITGAX	7.81958e-22	0.485643	0.651	0.442	1.00654e-17	Mo-DC2-CD14-C1QA-CD141	ITGAX
PPARD	1.44677e-21	0.357346	0.365	0.171	1.86229e-17	Mo-DC2-CD14-C1QA-CD141	PPARD
ZNF331	1.6366e-21	0.35981	0.81	0.593	2.10663e-17	Mo-DC2-CD14-C1QA-CD141	ZNF331
GADD45G	1.73171e-21	0.414287	0.296	0.123	2.22906e-17	Mo-DC2-CD14-C1QA-CD141	GADD45G
FTL	2.84287e-21	0.348489	0.993	0.98	3.65934e-17	Mo-DC2-CD14-C1QA-CD141	FTL
INSIG11	4.37303e-21	0.600412	0.577	0.38	5.62896e-17	Mo-DC2-CD14-C1QA-CD141	INSIG1
NLRP31	7.992e-21	0.425163	0.709	0.489	1.02873e-16	Mo-DC2-CD14-C1QA-CD141	NLRP3
ARL4A	3.19558e-20	0.37995	0.517	0.313	4.11335e-16	Mo-DC2-CD14-C1QA-CD141	ARL4A
ETS2	4.22091e-20	0.325265	0.757	0.56	5.43315e-16	Mo-DC2-CD14-C1QA-CD141	ETS2
IL10	6.87227e-20	0.418506	0.296	0.126	8.84598e-16	Mo-DC2-CD14-C1QA-CD141	IL10
RGCC1	8.09882e-20	0.384527	0.702	0.486	1.04248e-15	Mo-DC2-CD14-C1QA-CD141	RGCC
MALT11	2.53453e-19	0.375402	0.529	0.325	3.26245e-15	Mo-DC2-CD14-C1QA-CD141	MALT1
ICAM1	3.08461e-19	0.344544	0.57	0.369	3.97051e-15	Mo-DC2-CD14-C1QA-CD141	ICAM1
ARRDC3	1.50983e-18	0.342173	0.459	0.256	1.94345e-14	Mo-DC2-CD14-C1QA-CD141	ARRDC3
SLC25A37	2.29927e-18	0.395145	0.558	0.363	2.95962e-14	Mo-DC2-CD14-C1QA-CD141	SLC25A37
BTG1	4.38798e-18	0.340565	0.935	0.797	5.64821e-14	Mo-DC2-CD14-C1QA-CD141	BTG1
PLTP	6.63415e-18	0.379047	0.433	0.237	8.53948e-14	Mo-DC2-CD14-C1QA-CD141	PLTP
IL1B	6.83577e-18	0.448207	0.786	0.574	8.79901e-14	Mo-DC2-CD14-C1QA-CD141	IL1B
CCDC107	8.58658e-18	0.390692	0.572	0.389	1.10526e-13	Mo-DC2-CD14-C1QA-CD141	CCDC107
PPIF	9.06248e-18	0.323919	0.582	0.386	1.16652e-13	Mo-DC2-CD14-C1QA-CD141	PPIF
ADGRE2	1.07108e-17	0.366549	0.474	0.29	1.3787e-13	Mo-DC2-CD14-C1QA-CD141	ADGRE2
SYAP11	1.45542e-17	0.340155	0.731	0.561	1.87341e-13	Mo-DC2-CD14-C1QA-CD141	SYAP1
SERTAD1	3.42294e-15	0.336192	0.51	0.336	4.40601e-11	Mo-DC2-CD14-C1QA-CD141	SERTAD1
ADAM17	1.01725e-14	0.32238	0.524	0.35	1.3094e-10	Mo-DC2-CD14-C1QA-CD141	ADAM17
HMOX1	1.61115e-14	0.499909	0.635	0.469	2.07387e-10	Mo-DC2-CD14-C1QA-CD141	HMOX1
SATB1	8.04871e-14	0.467162	0.406	0.257	1.03603e-09	Mo-DC2-CD14-C1QA-CD141	SATB1
CCL20	8.79357e-14	1.13386	0.262	0.129	1.13191e-09	Mo-DC2-CD14-C1QA-CD141	CCL20
EREG	1.06625e-13	0.583252	0.317	0.165	1.37248e-09	Mo-DC2-CD14-C1QA-CD141	EREG
CCL4L2	9.52491e-09	0.398467	0.584	0.437	0.000122605	Mo-DC2-CD14-C1QA-CD141	CCL4L2
CXCL81	9.15161e-07	0.549579	0.493	0.371	0.0117799	Mo-DC2-CD14-C1QA-CD141	CXCL8
FABP5	2.35842e-06	0.326608	0.512	0.408	0.0303576	Mo-DC2-CD14-C1QA-CD141	FABP5
TDG	4.53809e-06	0.32523	0.349	0.261	0.0584143	Mo-DC2-CD14-C1QA-CD141	TDG
OLFML3	1.29311e-40	0.591613	0.586	0.277	1.66449e-36	Mo-DC3-CD14-C1QA-IL1B	OLFML3
C1QB1	2.05583e-40	0.661081	0.914	0.698	2.64626e-36	Mo-DC3-CD14-C1QA-IL1B	C1QB
C1QC1	6.42439e-39	0.662113	0.884	0.597	8.26948e-35	Mo-DC3-CD14-C1QA-IL1B	C1QC
TREM21	2.21512e-37	0.480014	0.774	0.445	2.85131e-33	Mo-DC3-CD14-C1QA-IL1B	TREM2
C31	2.98578e-37	0.501174	0.853	0.556	3.8433e-33	Mo-DC3-CD14-C1QA-IL1B	C3
RGS1	3.91047e-36	0.635017	0.96	0.828	5.03355e-32	Mo-DC3-CD14-C1QA-IL1B	RGS1
C1QA1	2.82651e-33	0.592194	0.909	0.716	3.63828e-29	Mo-DC3-CD14-C1QA-IL1B	C1QA
RHOB	9.0452e-33	0.508379	0.809	0.558	1.1643e-28	Mo-DC3-CD14-C1QA-IL1B	RHOB
MS4A7	3.09934e-31	0.410502	0.865	0.638	3.98947e-27	Mo-DC3-CD14-C1QA-IL1B	MS4A7
GPR34	1.59586e-29	0.52472	0.605	0.353	2.05419e-25	Mo-DC3-CD14-C1QA-IL1B	GPR34
CCL3	1.65933e-29	0.945831	0.8	0.557	2.13589e-25	Mo-DC3-CD14-C1QA-IL1B	CCL3
CLEC4E	3.52162e-29	0.45553	0.5	0.246	4.53302e-25	Mo-DC3-CD14-C1QA-IL1B	CLEC4E
IER31	9.93917e-29	0.482851	0.835	0.615	1.27937e-24	Mo-DC3-CD14-C1QA-IL1B	IER3
CXCR41	1.23798e-28	0.579247	0.912	0.757	1.59353e-24	Mo-DC3-CD14-C1QA-IL1B	CXCR4
ITM2B	1.7237e-28	0.348377	0.919	0.806	2.21875e-24	Mo-DC3-CD14-C1QA-IL1B	ITM2B
CCL3L1	1.23502e-27	0.980756	0.602	0.351	1.58972e-23	Mo-DC3-CD14-C1QA-IL1B	CCL3L1
IL1B1	1.24708e-27	0.68051	0.798	0.571	1.60524e-23	Mo-DC3-CD14-C1QA-IL1B	IL1B
APOE1	7.22855e-27	0.549136	0.881	0.748	9.30459e-23	Mo-DC3-CD14-C1QA-IL1B	APOE
HERPUD11	1.98652e-26	0.416403	0.921	0.778	2.55705e-22	Mo-DC3-CD14-C1QA-IL1B	HERPUD1
FCGR3A	3.10601e-26	0.401284	0.763	0.521	3.99806e-22	Mo-DC3-CD14-C1QA-IL1B	FCGR3A
ZNF3311	2.39111e-25	0.435747	0.816	0.591	3.07784e-21	Mo-DC3-CD14-C1QA-IL1B	ZNF331
ZFP36	4.90415e-25	0.411301	0.933	0.806	6.31263e-21	Mo-DC3-CD14-C1QA-IL1B	ZFP36
SGK1	9.01499e-25	0.402839	0.902	0.722	1.16041e-20	Mo-DC3-CD14-C1QA-IL1B	SGK1
NR4A2	1.95436e-24	0.368212	0.83	0.633	2.51565e-20	Mo-DC3-CD14-C1QA-IL1B	NR4A2
APOC11	4.26477e-24	0.433219	0.828	0.62	5.48961e-20	Mo-DC3-CD14-C1QA-IL1B	APOC1
FILIP1L	2.16277e-23	0.508324	0.616	0.389	2.78392e-19	Mo-DC3-CD14-C1QA-IL1B	FILIP1L
SLC1A31	3.48926e-23	0.35666	0.665	0.429	4.49137e-19	Mo-DC3-CD14-C1QA-IL1B	SLC1A3
FCGR2A	7.74352e-23	0.328125	0.833	0.628	9.96746e-19	Mo-DC3-CD14-C1QA-IL1B	FCGR2A
FOS	1.21577e-22	0.367446	0.942	0.834	1.56494e-18	Mo-DC3-CD14-C1QA-IL1B	FOS
IER2	4.93697e-22	0.415837	0.851	0.669	6.35487e-18	Mo-DC3-CD14-C1QA-IL1B	IER2
PLD4	6.9593e-22	0.352335	0.74	0.518	8.95801e-18	Mo-DC3-CD14-C1QA-IL1B	PLD4
LILRB4	2.37867e-21	0.329252	0.698	0.462	3.06182e-17	Mo-DC3-CD14-C1QA-IL1B	LILRB4
CCL4L21	2.69671e-21	0.784733	0.647	0.425	3.47121e-17	Mo-DC3-CD14-C1QA-IL1B	CCL4L2
LPAR6	1.39583e-20	0.357789	0.507	0.3	1.79671e-16	Mo-DC3-CD14-C1QA-IL1B	LPAR6
FCGR1A	1.48901e-19	0.340878	0.642	0.427	1.91666e-15	Mo-DC3-CD14-C1QA-IL1B	FCGR1A
USP53	1.68136e-19	0.395798	0.533	0.336	2.16424e-15	Mo-DC3-CD14-C1QA-IL1B	USP53
CH25H	2.02651e-19	0.670694	0.405	0.213	2.60852e-15	Mo-DC3-CD14-C1QA-IL1B	CH25H
ZFAND5	4.63188e-19	0.373472	0.837	0.678	5.96216e-15	Mo-DC3-CD14-C1QA-IL1B	ZFAND5
OSM	6.26754e-19	0.351293	0.407	0.213	8.06757e-15	Mo-DC3-CD14-C1QA-IL1B	OSM
CNPY3	1.32842e-18	0.334139	0.77	0.596	1.70994e-14	Mo-DC3-CD14-C1QA-IL1B	CNPY3
ATF3	1.24755e-17	0.380935	0.677	0.499	1.60584e-13	Mo-DC3-CD14-C1QA-IL1B	ATF3
JUNB	1.47128e-17	0.326981	0.937	0.826	1.89384e-13	Mo-DC3-CD14-C1QA-IL1B	JUNB
PTGER4	2.85442e-17	0.356233	0.591	0.413	3.67422e-13	Mo-DC3-CD14-C1QA-IL1B	PTGER4
VSIG4	1.5353e-16	0.332294	0.602	0.398	1.97624e-12	Mo-DC3-CD14-C1QA-IL1B	VSIG4
NLRP32	1.35177e-15	0.385692	0.686	0.491	1.74e-11	Mo-DC3-CD14-C1QA-IL1B	NLRP3
RGS2	1.48911e-15	0.370955	0.86	0.728	1.91679e-11	Mo-DC3-CD14-C1QA-IL1B	RGS2
CD69	2.57509e-15	0.330472	0.577	0.4	3.31465e-11	Mo-DC3-CD14-C1QA-IL1B	CD69
CD91	5.2742e-15	0.338826	0.584	0.386	6.78894e-11	Mo-DC3-CD14-C1QA-IL1B	CD9
CCL4	1.53543e-14	0.621828	0.728	0.559	1.9764e-10	Mo-DC3-CD14-C1QA-IL1B	CCL4
SAP30	1.00125e-12	0.370248	0.458	0.309	1.28881e-08	Mo-DC3-CD14-C1QA-IL1B	SAP30
IFI44L	1.80796e-12	0.333937	0.426	0.272	2.32721e-08	Mo-DC3-CD14-C1QA-IL1B	IFI44L
LGALS3BP	1.80876e-12	0.440744	0.447	0.294	2.32823e-08	Mo-DC3-CD14-C1QA-IL1B	LGALS3BP
PADI2	2.62549e-12	0.333652	0.435	0.278	3.37953e-08	Mo-DC3-CD14-C1QA-IL1B	PADI2
IFI6	9.29928e-09	0.504044	0.542	0.429	0.0001197	Mo-DC3-CD14-C1QA-IL1B	IFI6
IFI27	4.81854e-07	0.658825	0.253	0.16	0.00620243	Mo-DC3-CD14-C1QA-IL1B	IFI27
TXNIP	2.93889e-25	0.765966	0.709	0.574	3.78294e-21	Mo-DC4-CD14-C1QA-CLEC10A	TXNIP
NPC2	5.08965e-16	0.366454	0.85	0.824	6.5514e-12	Mo-DC4-CD14-C1QA-CLEC10A	NPC2
FCGR3A1	6.89142e-14	0.491681	0.664	0.539	8.87063e-10	Mo-DC4-CD14-C1QA-CLEC10A	FCGR3A
VSIR	1.03656e-13	0.385145	0.697	0.64	1.33427e-09	Mo-DC4-CD14-C1QA-CLEC10A	VSIR
GIMAP1	3.15412e-13	0.381474	0.271	0.138	4.05999e-09	Mo-DC4-CD14-C1QA-CLEC10A	GIMAP1
SERPINA1	2.39433e-12	0.486826	0.654	0.566	3.08198e-08	Mo-DC4-CD14-C1QA-CLEC10A	SERPINA1
CD741	2.68191e-12	0.394964	0.962	0.963	3.45216e-08	Mo-DC4-CD14-C1QA-CLEC10A	CD74
CSF1R	8.32542e-12	0.34371	0.709	0.603	1.07165e-07	Mo-DC4-CD14-C1QA-CLEC10A	CSF1R
GIMAP7	1.04396e-11	0.406203	0.261	0.138	1.34379e-07	Mo-DC4-CD14-C1QA-CLEC10A	GIMAP7
MS4A6A	1.11023e-11	0.384689	0.737	0.71	1.42909e-07	Mo-DC4-CD14-C1QA-CLEC10A	MS4A6A
JUN	1.82246e-11	0.442097	0.779	0.711	2.34587e-07	Mo-DC4-CD14-C1QA-CLEC10A	JUN
NME2	5.35004e-11	0.52079	0.346	0.212	6.88658e-07	Mo-DC4-CD14-C1QA-CLEC10A	NME2
SLC7A7	8.05855e-11	0.419162	0.449	0.319	1.0373e-06	Mo-DC4-CD14-C1QA-CLEC10A	SLC7A7
EEF1G	1.5656e-10	0.689458	0.378	0.258	2.01524e-06	Mo-DC4-CD14-C1QA-CLEC10A	EEF1G
POLD4	2.68311e-10	0.343019	0.449	0.318	3.4537e-06	Mo-DC4-CD14-C1QA-CLEC10A	POLD4
IRF5	3.762e-10	0.401694	0.288	0.173	4.84245e-06	Mo-DC4-CD14-C1QA-CLEC10A	IRF5
RNASEK	1.16229e-09	0.455193	0.371	0.259	1.49609e-05	Mo-DC4-CD14-C1QA-CLEC10A	RNASEK
GABARAP	1.33242e-09	0.654833	0.574	0.51	1.71509e-05	Mo-DC4-CD14-C1QA-CLEC10A	GABARAP
RCSD1	1.73694e-09	0.449078	0.461	0.359	2.23579e-05	Mo-DC4-CD14-C1QA-CLEC10A	RCSD1
MAFB	9.62836e-09	0.48649	0.604	0.501	0.000123936	Mo-DC4-CD14-C1QA-CLEC10A	MAFB
DPYD	1.14637e-08	0.440957	0.401	0.294	0.000147561	Mo-DC4-CD14-C1QA-CLEC10A	DPYD
FCGR2B	2.6721e-08	0.507326	0.514	0.424	0.000343953	Mo-DC4-CD14-C1QA-CLEC10A	FCGR2B
SCAMP2	4.09027e-08	0.344497	0.559	0.479	0.0005265	Mo-DC4-CD14-C1QA-CLEC10A	SCAMP2
MAN2B1	4.20511e-08	0.446577	0.356	0.254	0.000541282	Mo-DC4-CD14-C1QA-CLEC10A	MAN2B1
AOAH	8.03901e-08	0.404447	0.491	0.399	0.00103478	Mo-DC4-CD14-C1QA-CLEC10A	AOAH
INTS10	1.61424e-07	0.451617	0.419	0.32	0.00207785	Mo-DC4-CD14-C1QA-CLEC10A	INTS10
FXYD5	2.11575e-07	0.373132	0.717	0.697	0.00272339	Mo-DC4-CD14-C1QA-CLEC10A	FXYD5
RNF130	2.16482e-07	0.344109	0.649	0.59	0.00278656	Mo-DC4-CD14-C1QA-CLEC10A	RNF130
ZFP36L1	2.33922e-07	0.376875	0.707	0.671	0.00301104	Mo-DC4-CD14-C1QA-CLEC10A	ZFP36L1
F13A1	4.11317e-07	0.328797	0.311	0.212	0.00529448	Mo-DC4-CD14-C1QA-CLEC10A	F13A1
PLD41	7.90472e-07	0.332071	0.609	0.541	0.010175	Mo-DC4-CD14-C1QA-CLEC10A	PLD4
EGR1	2.43223e-06	0.409725	0.431	0.335	0.0313076	Mo-DC4-CD14-C1QA-CLEC10A	EGR1
REEP4	4.27443e-06	0.406788	0.281	0.191	0.0550205	Mo-DC4-CD14-C1QA-CLEC10A	REEP4
CASP1	7.00228e-06	0.335656	0.491	0.404	0.0901333	Mo-DC4-CD14-C1QA-CLEC10A	CASP1
CALHM6	8.39649e-06	0.322966	0.544	0.494	0.10808	Mo-DC4-CD14-C1QA-CLEC10A	CALHM6
FCGR1A1	1.11679e-05	0.384937	0.519	0.449	0.143753	Mo-DC4-CD14-C1QA-CLEC10A	FCGR1A
AZI2	2.64949e-05	0.329477	0.336	0.259	0.341042	Mo-DC4-CD14-C1QA-CLEC10A	AZI2
CHCHD10	0.000131111	0.344184	0.604	0.572	1	Mo-DC4-CD14-C1QA-CLEC10A	CHCHD10
PDK4	0.000306546	0.390977	0.316	0.246	1	Mo-DC4-CD14-C1QA-CLEC10A	PDK4
NCF1	0.00185687	0.343608	0.454	0.415	1	Mo-DC4-CD14-C1QA-CLEC10A	NCF1
HRH2	0.00400878	0.381588	0.256	0.207	1	Mo-DC4-CD14-C1QA-CLEC10A	HRH2
ATF6B	0.00406951	0.358008	0.333	0.294	1	Mo-DC4-CD14-C1QA-CLEC10A	ATF6B
MGAT4A	0.00602263	0.331171	0.444	0.399	1	Mo-DC4-CD14-C1QA-CLEC10A	MGAT4A
SPP1	1.76114e-26	1.12666	0.772	0.758	2.26695e-22	LowReads	SPP1
CLK1	2.5714e-14	0.502232	0.333	0.573	3.3099e-10	LowReads	CLK1
ROMO1	3.72665e-14	0.349706	0.269	0.486	4.79694e-10	LowReads	ROMO1
EPB41L2	5.94103e-14	0.326962	0.275	0.494	7.6473e-10	LowReads	EPB41L2
FOSL2	7.97186e-13	0.491828	0.263	0.467	1.02614e-08	LowReads	FOSL2
KCTD12	1.63265e-12	0.378371	0.36	0.592	2.10154e-08	LowReads	KCTD12
PER1	5.78677e-12	0.410354	0.347	0.554	7.44872e-08	LowReads	PER1
MARCKS1	1.53718e-11	0.404644	0.366	0.601	1.97865e-07	LowReads	MARCKS
PDXK	2.47156e-11	0.503507	0.222	0.396	3.18139e-07	LowReads	PDXK
WTAP	2.47493e-11	0.660772	0.293	0.484	3.18573e-07	LowReads	WTAP
PIM3	1.06941e-10	0.326794	0.263	0.443	1.37654e-06	LowReads	PIM3
IQGAP1	1.12697e-10	0.371014	0.337	0.544	1.45064e-06	LowReads	IQGAP1
GRASP	1.23059e-10	0.335714	0.333	0.527	1.58401e-06	LowReads	GRASP
ARL8B	1.38502e-10	0.330283	0.212	0.376	1.78279e-06	LowReads	ARL8B
H2AFZ1	1.38971e-10	0.389675	0.414	0.682	1.78883e-06	LowReads	H2AFZ
GSTO1	2.0938e-10	0.357799	0.384	0.621	2.69514e-06	LowReads	GSTO1
ACSL11	2.5912e-10	0.469197	0.358	0.572	3.33539e-06	LowReads	ACSL1
SLC7A5	2.61747e-10	0.477249	0.236	0.406	3.3692e-06	LowReads	SLC7A5
SORL1	3.43743e-10	0.398588	0.255	0.442	4.42466e-06	LowReads	SORL1
TIMP2	4.45962e-10	0.345004	0.214	0.379	5.74042e-06	LowReads	TIMP2
MSR11	4.49836e-10	0.403732	0.271	0.465	5.79029e-06	LowReads	MSR1
SOD21	1.00759e-09	0.462274	0.394	0.603	1.29697e-05	LowReads	SOD2
PFKFB3	1.42272e-09	0.412395	0.323	0.502	1.83133e-05	LowReads	PFKFB3
CYTH11	2.90553e-09	0.431426	0.238	0.398	3.74e-05	LowReads	CYTH1
SEC61G	4.40955e-09	0.33085	0.378	0.606	5.67597e-05	LowReads	SEC61G
NUDC	5.41792e-09	0.322003	0.281	0.452	6.97395e-05	LowReads	NUDC
METRNL	5.99365e-09	0.361504	0.303	0.482	7.71502e-05	LowReads	METRNL
CTSL1	1.14519e-08	0.326517	0.259	0.425	0.000147409	LowReads	CTSL
NASP	2.40939e-08	0.475234	0.297	0.469	0.000310137	LowReads	NASP
TGFBI	3.62146e-08	0.435127	0.38	0.583	0.000466155	LowReads	TGFBI
GPCPD1	4.96228e-08	0.517717	0.178	0.309	0.000638744	LowReads	GPCPD1
YWHAG	5.37005e-08	0.34764	0.198	0.338	0.000691233	LowReads	YWHAG
ELL21	5.66174e-08	0.574241	0.313	0.499	0.000728779	LowReads	ELL2
CANX	7.75189e-08	0.388129	0.398	0.611	0.000997824	LowReads	CANX
MAPKAPK2	7.76297e-08	0.358002	0.176	0.303	0.000999249	LowReads	MAPKAPK2
ACTR31	8.50112e-08	0.334981	0.404	0.645	0.00109426	LowReads	ACTR3
MXD1	1.10789e-07	0.331552	0.257	0.405	0.00142608	LowReads	MXD1
FMNL2	1.27353e-07	0.357786	0.141	0.264	0.00163929	LowReads	FMNL2
EDEM1	3.32089e-07	0.367096	0.204	0.318	0.00427465	LowReads	EDEM1
ST6GAL1	3.45637e-07	0.349909	0.166	0.282	0.00444904	LowReads	ST6GAL1
RCC2	4.47023e-07	0.402773	0.24	0.371	0.00575408	LowReads	RCC2
ABL2	1.00903e-06	0.496751	0.206	0.33	0.0129882	LowReads	ABL2
LGMN	1.04777e-06	0.363181	0.232	0.366	0.013487	LowReads	LGMN
CYLD	1.23218e-06	0.322454	0.257	0.382	0.0158606	LowReads	CYLD
JDP2	2.90876e-06	0.447428	0.196	0.31	0.0374416	LowReads	JDP2
HDLBP	3.17322e-06	0.36911	0.251	0.387	0.0408457	LowReads	HDLBP
ABCA1	3.71882e-06	0.325566	0.152	0.256	0.0478687	LowReads	ABCA1
AES1	3.7461e-06	0.33481	0.281	0.422	0.0482198	LowReads	AES
VDAC3	4.67816e-06	0.409553	0.216	0.338	0.0602173	LowReads	VDAC3
ZFAND2A	4.81056e-06	0.325828	0.188	0.298	0.0619216	LowReads	ZFAND2A
TUBA1A	5.05396e-06	0.398052	0.412	0.595	0.0650545	LowReads	TUBA1A
TRIM28	5.14145e-06	0.333939	0.149	0.253	0.0661807	LowReads	TRIM28
OTUD1	6.14919e-06	0.369261	0.19	0.305	0.0791523	LowReads	OTUD1
PLEC	6.50906e-06	0.33166	0.238	0.363	0.0837847	LowReads	PLEC
SLC11A11	9.49077e-06	0.436348	0.331	0.505	0.122165	LowReads	SLC11A1
EGR11	1.17123e-05	0.406056	0.242	0.37	0.150761	LowReads	EGR1
CTSD	1.24987e-05	0.429957	0.436	0.613	0.160883	LowReads	CTSD
PGK1	1.61201e-05	0.435163	0.448	0.707	0.207497	LowReads	PGK1
SLCO2B1	1.9523e-05	0.533857	0.21	0.33	0.2513	LowReads	SLCO2B1
ANXA1	2.85658e-05	0.33538	0.446	0.644	0.367699	LowReads	ANXA1
SLC38A2	2.97968e-05	0.569781	0.295	0.437	0.383544	LowReads	SLC38A2
IST1	3.01809e-05	0.478571	0.194	0.296	0.388488	LowReads	IST1
CYFIP1	5.03229e-05	0.361734	0.279	0.391	0.647756	LowReads	CYFIP1
SNHG12	5.63133e-05	0.416333	0.172	0.268	0.724865	LowReads	SNHG12
PGAM1	5.66783e-05	0.434181	0.384	0.565	0.729563	LowReads	PGAM1
ANXA2	6.88223e-05	0.446694	0.418	0.628	0.885881	LowReads	ANXA2
DDA1	8.12364e-05	0.422429	0.172	0.26	1	LowReads	DDA1
KLF2	8.42852e-05	0.354984	0.224	0.334	1	LowReads	KLF2
CAPRIN1	9.94832e-05	0.338888	0.246	0.346	1	LowReads	CAPRIN1
EHBP1L1	0.000119993	0.510739	0.214	0.314	1	LowReads	EHBP1L1
FOSB	0.000144942	0.364649	0.541	0.745	1	LowReads	FOSB
STMN1	0.000154076	0.557786	0.158	0.257	1	LowReads	STMN1
PHC2	0.000172114	0.364009	0.242	0.344	1	LowReads	PHC2
HSP90B1	0.000182391	0.432501	0.479	0.703	1	LowReads	HSP90B1
AP3D1	0.000228708	0.391726	0.204	0.297	1	LowReads	AP3D1
PLIN21	0.000234087	0.512172	0.424	0.581	1	LowReads	PLIN2
NAPRT	0.000289695	0.368186	0.172	0.257	1	LowReads	NAPRT
CD1631	0.000301345	0.472531	0.43	0.583	1	LowReads	CD163
NR4A1	0.000670012	0.427775	0.533	0.751	1	LowReads	NR4A1
AHR	0.000674591	0.325188	0.234	0.331	1	LowReads	AHR
IER51	0.000929912	0.432328	0.358	0.503	1	LowReads	IER5
HIF1A1	0.00109195	0.463281	0.467	0.64	1	LowReads	HIF1A
SLBP	0.00139375	0.345092	0.184	0.26	1	LowReads	SLBP
LDHA	0.00147598	0.439655	0.509	0.767	1	LowReads	LDHA
ADGRE51	0.00147926	0.39136	0.265	0.362	1	LowReads	ADGRE5
SIRPA	0.00456198	0.63575	0.281	0.368	1	LowReads	SIRPA
OXSR11	0.00812639	0.426168	0.188	0.253	1	LowReads	OXSR1
LMNA1	0.00964441	0.579615	0.285	0.395	1	LowReads	LMNA
SPP11	1.63261e-12	1.68685	1	0.758	2.1015e-08	HSPHi-Dying	SPP1
UBC	1.40292e-07	0.74008	0.955	0.92	0.00180583	HSPHi-Dying	UBC
HSP90AA1	1.91914e-07	1.14063	0.909	0.879	0.00247032	HSPHi-Dying	HSP90AA1
NEAT1	6.12613e-07	0.798675	0.955	0.889	0.00788555	HSPHi-Dying	NEAT1
PCBP2	6.04727e-05	0.340542	0.136	0.724	0.778404	HSPHi-Dying	PCBP2
NAMPT	6.1331e-05	1.66042	0.727	0.723	0.789452	HSPHi-Dying	NAMPT
YWHAE	7.25422e-05	0.498673	0.091	0.624	0.933764	HSPHi-Dying	YWHAE
SOD22	7.48979e-05	1.70678	0.682	0.567	0.964086	HSPHi-Dying	SOD2
CIB1	8.97375e-05	0.329788	0.091	0.616	1	HSPHi-Dying	CIB1
CDC42	9.19205e-05	0.385528	0.136	0.708	1	HSPHi-Dying	CDC42
G0S21	9.36599e-05	1.52391	0.591	0.311	1	HSPHi-Dying	G0S2
SET	0.000100206	0.346262	0.091	0.612	1	HSPHi-Dying	SET
TAX1BP1	0.00011071	0.60938	0.045	0.519	1	HSPHi-Dying	TAX1BP1
DEK	0.000124879	0.34129	0.091	0.604	1	HSPHi-Dying	DEK
NUCKS1	0.000170607	0.372291	0.091	0.592	1	HSPHi-Dying	NUCKS1
ITGB1	0.00020026	0.652073	0.045	0.497	1	HSPHi-Dying	ITGB1
GNB2	0.0002253	0.419148	0.091	0.582	1	HSPHi-Dying	GNB2
HAVCR2	0.000253475	0.41762	0.091	0.577	1	HSPHi-Dying	HAVCR2
EIF4B	0.000273453	0.601366	0.091	0.574	1	HSPHi-Dying	EIF4B
CCL41	0.000343337	1.01158	0.727	0.582	1	HSPHi-Dying	CCL4
XRCC6	0.000372536	0.501298	0.091	0.562	1	HSPHi-Dying	XRCC6
CNDP2	0.000375727	0.430411	0.091	0.561	1	HSPHi-Dying	CNDP2
CSF2RA1	0.000377684	0.325239	0.136	0.654	1	HSPHi-Dying	CSF2RA
SMIM26	0.000410378	0.832936	0.045	0.469	1	HSPHi-Dying	SMIM26
TAPBP2	0.000415483	0.515473	0.091	0.558	1	HSPHi-Dying	TAPBP
COX7B	0.000416407	0.340311	0.136	0.647	1	HSPHi-Dying	COX7B
SRSF111	0.000434011	0.47595	0.091	0.555	1	HSPHi-Dying	SRSF11
SPINT21	0.000442679	0.444116	0.091	0.555	1	HSPHi-Dying	SPINT2
SEC62	0.000452622	0.448478	0.091	0.554	1	HSPHi-Dying	SEC62
REX1BD	0.000475005	0.62199	0.091	0.552	1	HSPHi-Dying	REX1BD
BRD2	0.000486328	0.470465	0.091	0.551	1	HSPHi-Dying	BRD2
DAZAP2	0.000529154	0.521459	0.136	0.641	1	HSPHi-Dying	DAZAP2
UBE2D3	0.000544204	0.56477	0.182	0.737	1	HSPHi-Dying	UBE2D3
REEP5	0.000567371	0.515948	0.091	0.545	1	HSPHi-Dying	REEP5
HSD17B11	0.000599067	0.406371	0.045	0.453	1	HSPHi-Dying	HSD17B11
EIF3A	0.000655959	0.345668	0.091	0.538	1	HSPHi-Dying	EIF3A
RNPS1	0.000658523	0.352029	0.045	0.449	1	HSPHi-Dying	RNPS1
KPNB1	0.000671475	0.362391	0.045	0.449	1	HSPHi-Dying	KPNB1
HM13	0.000676678	0.341969	0.045	0.448	1	HSPHi-Dying	HM13
ARRB2	0.000767122	0.381608	0.136	0.623	1	HSPHi-Dying	ARRB2
ARPC4	0.000791702	0.390161	0.091	0.53	1	HSPHi-Dying	ARPC4
SNRPE	0.000803685	0.384802	0.045	0.441	1	HSPHi-Dying	SNRPE
CSF1R1	0.000826384	0.325629	0.136	0.621	1	HSPHi-Dying	CSF1R
SFPQ	0.000847264	0.654621	0.136	0.619	1	HSPHi-Dying	SFPQ
NINJ11	0.000853849	0.482318	0.091	0.528	1	HSPHi-Dying	NINJ1
DBNL	0.000871736	0.560612	0.091	0.527	1	HSPHi-Dying	DBNL
CLTB	0.000908581	0.63703	0.045	0.436	1	HSPHi-Dying	CLTB
SCAF11	0.000929811	0.493349	0.091	0.524	1	HSPHi-Dying	SCAF11
RGS19	0.000931364	0.672405	0.091	0.525	1	HSPHi-Dying	RGS19
PER11	0.00094847	0.497353	0.091	0.522	1	HSPHi-Dying	PER1
PRPF38B	0.000958984	0.753891	0.091	0.523	1	HSPHi-Dying	PRPF38B
FIS1	0.000994967	1.03137	0.091	0.521	1	HSPHi-Dying	FIS1
TXN21	0.00101948	0.368526	0.045	0.431	1	HSPHi-Dying	TXN2
FAM96A	0.00102452	0.439711	0.045	0.431	1	HSPHi-Dying	FAM96A
ZFAND51	0.00102674	0.408047	0.182	0.705	1	HSPHi-Dying	ZFAND5
ARL6IP1	0.00109435	0.757795	0.091	0.517	1	HSPHi-Dying	ARL6IP1
PYURF	0.00109511	0.344761	0.045	0.428	1	HSPHi-Dying	PYURF
CACYBP	0.00116202	0.34757	0.045	0.425	1	HSPHi-Dying	CACYBP
IQGAP11	0.0011847	0.336959	0.091	0.512	1	HSPHi-Dying	IQGAP1
CD84	0.00118985	0.56248	0.045	0.424	1	HSPHi-Dying	CD84
IDS	0.00131492	0.604491	0.091	0.509	1	HSPHi-Dying	IDS
GPR65	0.00134894	0.373378	0.045	0.419	1	HSPHi-Dying	GPR65
KHDRBS11	0.00139049	0.44858	0.091	0.506	1	HSPHi-Dying	KHDRBS1
LDHB	0.00148633	0.679874	0.136	0.595	1	HSPHi-Dying	LDHB
ARID4B	0.00150548	0.432245	0.045	0.414	1	HSPHi-Dying	ARID4B
RB1	0.00151718	0.578739	0.045	0.414	1	HSPHi-Dying	RB1
BAZ1A	0.00152846	0.536098	0.091	0.503	1	HSPHi-Dying	BAZ1A
IRF81	0.00153529	0.499313	0.091	0.502	1	HSPHi-Dying	IRF8
UNC93B1	0.00154977	0.382373	0.045	0.413	1	HSPHi-Dying	UNC93B1
RALY	0.00155521	0.605105	0.091	0.502	1	HSPHi-Dying	RALY
METTL9	0.00156782	0.364664	0.045	0.412	1	HSPHi-Dying	METTL9
TMEM9B	0.0015754	0.544816	0.045	0.412	1	HSPHi-Dying	TMEM9B
CTSA	0.00158454	0.381783	0.045	0.412	1	HSPHi-Dying	CTSA
CKLF1	0.0016184	0.39808	0.136	0.59	1	HSPHi-Dying	CKLF
TGOLN2	0.0016211	0.632094	0.091	0.5	1	HSPHi-Dying	TGOLN2
TIMM13	0.00165304	0.388495	0.045	0.41	1	HSPHi-Dying	TIMM13
IFNGR2	0.00169111	0.522929	0.136	0.589	1	HSPHi-Dying	IFNGR2
LRRFIP1	0.00172563	0.465294	0.182	0.685	1	HSPHi-Dying	LRRFIP1
TMEM59	0.00174107	0.74844	0.136	0.588	1	HSPHi-Dying	TMEM59
CHST11	0.00177448	0.356242	0.045	0.407	1	HSPHi-Dying	CHST11
SNHG15	0.00179495	0.372593	0.045	0.406	1	HSPHi-Dying	SNHG15
STUB1	0.00182081	0.500563	0.045	0.406	1	HSPHi-Dying	STUB1
ARHGDIA	0.00187181	0.67976	0.136	0.584	1	HSPHi-Dying	ARHGDIA
C1QBP	0.00193373	0.866033	0.091	0.492	1	HSPHi-Dying	C1QBP
FIBP	0.00197398	0.381199	0.045	0.402	1	HSPHi-Dying	FIBP
TLR21	0.00199368	0.372795	0.091	0.49	1	HSPHi-Dying	TLR2
GUK1	0.00199973	0.403364	0.182	0.675	1	HSPHi-Dying	GUK1
SERPINE1	0.00201121	1.83925	0.273	0.097	1	HSPHi-Dying	SERPINE1
ZFAND6	0.00207439	0.376909	0.045	0.4	1	HSPHi-Dying	ZFAND6
CUTA	0.0021497	0.757257	0.091	0.487	1	HSPHi-Dying	CUTA
CCT6A	0.00216625	1.10814	0.091	0.487	1	HSPHi-Dying	CCT6A
B4GALT1	0.00217308	0.342431	0.091	0.485	1	HSPHi-Dying	B4GALT1
EPN1	0.00222104	0.930201	0.045	0.397	1	HSPHi-Dying	EPN1
STXBP2	0.00225873	0.376474	0.045	0.396	1	HSPHi-Dying	STXBP2
HMGN2	0.00226303	0.587001	0.182	0.672	1	HSPHi-Dying	HMGN2
SPG21	0.0022673	0.501676	0.045	0.396	1	HSPHi-Dying	SPG21
NME3	0.00227358	0.370478	0.045	0.396	1	HSPHi-Dying	NME3
GRINA1	0.00230882	0.47089	0.136	0.574	1	HSPHi-Dying	GRINA
PCM1	0.00240032	0.332054	0.045	0.393	1	HSPHi-Dying	PCM1
P4HB	0.00248446	0.652369	0.136	0.571	1	HSPHi-Dying	P4HB
PHPT11	0.00250391	0.665127	0.091	0.48	1	HSPHi-Dying	PHPT1
MCRIP1	0.00250533	0.334961	0.045	0.391	1	HSPHi-Dying	MCRIP1
DDX3X	0.00255559	0.717375	0.136	0.57	1	HSPHi-Dying	DDX3X
ZNF385A	0.00255725	0.488238	0.045	0.39	1	HSPHi-Dying	ZNF385A
FAM177A1	0.00261236	0.410981	0.045	0.389	1	HSPHi-Dying	FAM177A1
IRF2BP2	0.0026475	0.60099	0.091	0.477	1	HSPHi-Dying	IRF2BP2
CELF2	0.0027235	0.370016	0.182	0.659	1	HSPHi-Dying	CELF2
TES	0.00275123	0.466683	0.045	0.387	1	HSPHi-Dying	TES
PLEKHB2	0.00277162	0.476603	0.045	0.387	1	HSPHi-Dying	PLEKHB2
ETF1	0.00277918	0.503772	0.091	0.474	1	HSPHi-Dying	ETF1
DEGS1	0.00287027	0.461135	0.045	0.385	1	HSPHi-Dying	DEGS1
STK17A1	0.00288067	0.364255	0.045	0.385	1	HSPHi-Dying	STK17A
NDUFS4	0.00289417	0.396561	0.045	0.385	1	HSPHi-Dying	NDUFS4
PFKL	0.00290229	0.9053	0.045	0.385	1	HSPHi-Dying	PFKL
EMC10	0.0029128	0.506005	0.045	0.384	1	HSPHi-Dying	EMC10
SWAP70	0.00293702	0.401947	0.045	0.384	1	HSPHi-Dying	SWAP70
CUX1	0.00294764	0.344915	0.045	0.384	1	HSPHi-Dying	CUX1
MYO1F	0.00301415	0.578849	0.091	0.471	1	HSPHi-Dying	MYO1F
RBCK1	0.00302168	0.448534	0.045	0.383	1	HSPHi-Dying	RBCK1
SPAG7	0.00304673	0.476658	0.045	0.382	1	HSPHi-Dying	SPAG7
GTF2I	0.00309311	0.445061	0.045	0.382	1	HSPHi-Dying	GTF2I
TMCO1	0.00311726	0.498509	0.045	0.381	1	HSPHi-Dying	TMCO1
TCIRG1	0.00316564	0.355107	0.045	0.38	1	HSPHi-Dying	TCIRG1
PUF60	0.00324471	0.389833	0.045	0.379	1	HSPHi-Dying	PUF60
BNIP3L	0.0032911	0.606113	0.091	0.467	1	HSPHi-Dying	BNIP3L
CTNNA1	0.00331482	0.4006	0.045	0.378	1	HSPHi-Dying	CTNNA1
GK	0.00337611	0.509488	0.091	0.465	1	HSPHi-Dying	GK
PTBP1	0.00347312	0.333482	0.045	0.376	1	HSPHi-Dying	PTBP1
OTUB1	0.00348333	0.558238	0.045	0.376	1	HSPHi-Dying	OTUB1
TMEM123	0.00352773	0.630637	0.091	0.464	1	HSPHi-Dying	TMEM123
METAP21	0.00354013	0.39432	0.045	0.375	1	HSPHi-Dying	METAP2
DCTN3	0.00354668	0.482458	0.045	0.375	1	HSPHi-Dying	DCTN3
LSM10	0.0035516	0.535388	0.045	0.375	1	HSPHi-Dying	LSM10
NDUFS2	0.0036144	0.379008	0.045	0.374	1	HSPHi-Dying	NDUFS2
TAOK3	0.00364098	0.831681	0.136	0.554	1	HSPHi-Dying	TAOK3
TMED10	0.00365478	1.00667	0.136	0.553	1	HSPHi-Dying	TMED10
SRP9	0.00366755	0.76612	0.091	0.462	1	HSPHi-Dying	SRP9
EPB41L21	0.00371494	0.418806	0.091	0.46	1	HSPHi-Dying	EPB41L2
CALM31	0.00371703	0.70849	0.091	0.461	1	HSPHi-Dying	CALM3
FCGR1A2	0.0037304	0.33006	0.091	0.461	1	HSPHi-Dying	FCGR1A
SDHD	0.00373399	0.449187	0.045	0.373	1	HSPHi-Dying	SDHD
MIS18BP1	0.00376015	0.479154	0.091	0.461	1	HSPHi-Dying	MIS18BP1
COX14	0.00383605	0.446303	0.091	0.459	1	HSPHi-Dying	COX14
PCNP	0.00386899	0.376236	0.045	0.371	1	HSPHi-Dying	PCNP
ADAP2	0.0039101	0.669347	0.091	0.459	1	HSPHi-Dying	ADAP2
NEMF1	0.00392676	0.465069	0.045	0.37	1	HSPHi-Dying	NEMF
SH3TC1	0.00395503	0.47954	0.045	0.37	1	HSPHi-Dying	SH3TC1
HCLS1	0.00399363	0.468812	0.227	0.746	1	HSPHi-Dying	HCLS1
NECTIN21	0.00409546	0.342909	0.045	0.368	1	HSPHi-Dying	NECTIN2
PTGES3	0.00410921	0.720764	0.182	0.641	1	HSPHi-Dying	PTGES3
SPTLC2	0.00411666	0.98539	0.091	0.456	1	HSPHi-Dying	SPTLC2
DNTTIP2	0.00412674	0.457674	0.045	0.368	1	HSPHi-Dying	DNTTIP2
TAF10	0.00420645	0.372725	0.045	0.367	1	HSPHi-Dying	TAF10
H2AFZ2	0.00423063	0.665023	0.182	0.64	1	HSPHi-Dying	H2AFZ
VOPP11	0.00425969	0.754307	0.091	0.455	1	HSPHi-Dying	VOPP1
SNRPD1	0.00426374	0.678281	0.091	0.454	1	HSPHi-Dying	SNRPD1
C6orf62	0.00426996	0.587105	0.091	0.454	1	HSPHi-Dying	C6orf62
CMTM3	0.00428254	0.42847	0.045	0.366	1	HSPHi-Dying	CMTM3
RHBDF2	0.00429063	0.562409	0.091	0.453	1	HSPHi-Dying	RHBDF2
NCF4	0.00434795	0.536453	0.045	0.366	1	HSPHi-Dying	NCF4
RSF1	0.004365	0.407512	0.045	0.365	1	HSPHi-Dying	RSF1
CALM1	0.00436957	0.514986	0.227	0.738	1	HSPHi-Dying	CALM1
FYB1	0.00444908	0.379591	0.182	0.635	1	HSPHi-Dying	FYB1
MRPS15	0.00448881	0.434425	0.045	0.364	1	HSPHi-Dying	MRPS15
NT5C	0.00450935	1.12917	0.045	0.364	1	HSPHi-Dying	NT5C
RAD21	0.00452078	0.459388	0.045	0.364	1	HSPHi-Dying	RAD21
RER1	0.00454768	0.719974	0.091	0.451	1	HSPHi-Dying	RER1
SLC39A1	0.00462216	0.451868	0.045	0.362	1	HSPHi-Dying	SLC39A1
LAPTM4A	0.00468942	0.608955	0.182	0.634	1	HSPHi-Dying	LAPTM4A
TNFRSF1B1	0.00469655	0.510551	0.136	0.539	1	HSPHi-Dying	TNFRSF1B
ODF3B	0.00476347	0.448345	0.045	0.361	1	HSPHi-Dying	ODF3B
LACTB	0.00489984	0.549001	0.045	0.36	1	HSPHi-Dying	LACTB
RBBP4	0.00499538	0.409725	0.045	0.359	1	HSPHi-Dying	RBBP4
TRAPPC3	0.00504894	0.660796	0.045	0.358	1	HSPHi-Dying	TRAPPC3
CCNL1	0.00509471	0.424158	0.182	0.626	1	HSPHi-Dying	CCNL1
FLII	0.00514249	0.412866	0.045	0.357	1	HSPHi-Dying	FLII
FERMT3	0.00519028	0.682529	0.091	0.445	1	HSPHi-Dying	FERMT3
CCDC50	0.00520101	0.430035	0.045	0.357	1	HSPHi-Dying	CCDC50
RBM47	0.0052376	0.424664	0.045	0.356	1	HSPHi-Dying	RBM47
LSM3	0.00536201	0.828591	0.091	0.443	1	HSPHi-Dying	LSM3
CIITA1	0.00537672	0.438057	0.091	0.442	1	HSPHi-Dying	CIITA
AP1S2	0.00537807	0.723862	0.136	0.533	1	HSPHi-Dying	AP1S2
CHMP2B	0.00543887	0.49476	0.045	0.355	1	HSPHi-Dying	CHMP2B
EIF4G2	0.00544684	1.03132	0.182	0.628	1	HSPHi-Dying	EIF4G2
PLAC82	0.00545363	0.384512	0.045	0.355	1	HSPHi-Dying	PLAC8
WBP2	0.00548195	0.528917	0.045	0.354	1	HSPHi-Dying	WBP2
SMS	0.00548796	0.460259	0.091	0.441	1	HSPHi-Dying	SMS
EIF2S3	0.00555825	0.764345	0.091	0.441	1	HSPHi-Dying	EIF2S3
PACSIN2	0.00569044	0.40401	0.045	0.352	1	HSPHi-Dying	PACSIN2
ILK	0.00576499	0.414336	0.045	0.352	1	HSPHi-Dying	ILK
NDUFA11	0.00577355	0.880478	0.136	0.531	1	HSPHi-Dying	NDUFA11
RCC21	0.0058419	0.441468	0.045	0.351	1	HSPHi-Dying	RCC2
ARL8B1	0.00590498	0.452122	0.045	0.351	1	HSPHi-Dying	ARL8B
TRIM44	0.00594992	0.325685	0.045	0.35	1	HSPHi-Dying	TRIM44
SNAP23	0.0059802	0.673537	0.091	0.438	1	HSPHi-Dying	SNAP23
NENF	0.00600364	0.499121	0.045	0.35	1	HSPHi-Dying	NENF
ATF31	0.00615976	0.755405	0.136	0.528	1	HSPHi-Dying	ATF3
CD81	0.00616125	0.560471	0.182	0.616	1	HSPHi-Dying	CD81
ACAA1	0.00622306	0.574289	0.091	0.435	1	HSPHi-Dying	ACAA1
PSMB41	0.00629693	0.714192	0.091	0.435	1	HSPHi-Dying	PSMB4
FAM204A	0.00630436	0.631949	0.045	0.348	1	HSPHi-Dying	FAM204A
PLIN3	0.00637482	0.444274	0.045	0.347	1	HSPHi-Dying	PLIN3
STX6	0.00637482	0.501791	0.045	0.347	1	HSPHi-Dying	STX6
PDCD6IP	0.0063977	0.634248	0.045	0.347	1	HSPHi-Dying	PDCD6IP
COX201	0.00640172	0.391359	0.045	0.346	1	HSPHi-Dying	COX20
DCK	0.00645754	0.349796	0.045	0.346	1	HSPHi-Dying	DCK
UBE2N	0.00646365	0.684729	0.091	0.434	1	HSPHi-Dying	UBE2N
TUBA1C1	0.006535	0.50141	0.091	0.432	1	HSPHi-Dying	TUBA1C
YME1L1	0.0065566	0.738932	0.091	0.433	1	HSPHi-Dying	YME1L1
VASH1	0.00665559	0.465322	0.045	0.345	1	HSPHi-Dying	VASH1
ACADVL	0.00670727	0.642969	0.091	0.431	1	HSPHi-Dying	ACADVL
HMGB2	0.00670872	0.589453	0.136	0.521	1	HSPHi-Dying	HMGB2
CAPNS11	0.00672405	0.705408	0.091	0.432	1	HSPHi-Dying	CAPNS1
UBE2R2	0.00678202	0.476337	0.045	0.344	1	HSPHi-Dying	UBE2R2
MIDN	0.00680335	0.678891	0.091	0.431	1	HSPHi-Dying	MIDN
DYNC1H1	0.00681189	0.687545	0.091	0.431	1	HSPHi-Dying	DYNC1H1
LYPLA1	0.00692914	0.561149	0.045	0.343	1	HSPHi-Dying	LYPLA1
CALCOCO2	0.0069892	0.49316	0.045	0.342	1	HSPHi-Dying	CALCOCO2
MYD881	0.0069892	0.538132	0.045	0.342	1	HSPHi-Dying	MYD88
XBP1	0.00709164	0.977907	0.136	0.52	1	HSPHi-Dying	XBP1
CCDC59	0.00714045	0.572958	0.045	0.341	1	HSPHi-Dying	CCDC59
DSTN1	0.00715749	0.515691	0.045	0.341	1	HSPHi-Dying	DSTN
UBE2E1	0.00722371	0.394238	0.045	0.34	1	HSPHi-Dying	UBE2E1
UBE2F1	0.00726236	0.408782	0.045	0.34	1	HSPHi-Dying	UBE2F
PKM	0.00728385	0.433792	0.227	0.704	1	HSPHi-Dying	PKM
ETFA	0.00738829	0.618746	0.045	0.34	1	HSPHi-Dying	ETFA
LRP10	0.00744323	0.454987	0.045	0.339	1	HSPHi-Dying	LRP10
FUNDC2	0.00752739	0.505551	0.045	0.339	1	HSPHi-Dying	FUNDC2
ACAP2	0.0075754	0.549753	0.045	0.338	1	HSPHi-Dying	ACAP2
AKIRIN2	0.00760423	0.388644	0.091	0.425	1	HSPHi-Dying	AKIRIN2
FNIP1	0.00763046	0.533956	0.045	0.338	1	HSPHi-Dying	FNIP1
AP1B1	0.00764535	0.622622	0.091	0.425	1	HSPHi-Dying	AP1B1
DNMT1	0.00768588	0.595765	0.045	0.338	1	HSPHi-Dying	DNMT1
TBC1D1	0.00776683	0.46422	0.045	0.337	1	HSPHi-Dying	TBC1D1
CSDE1	0.00784186	0.840442	0.182	0.608	1	HSPHi-Dying	CSDE1
C1orf541	0.00792235	0.491186	0.091	0.423	1	HSPHi-Dying	C1orf54
AIDA	0.00800611	0.340892	0.045	0.335	1	HSPHi-Dying	AIDA
SDCBP	0.00815429	0.485154	0.227	0.7	1	HSPHi-Dying	SDCBP
FDX1	0.00827653	0.600297	0.045	0.334	1	HSPHi-Dying	FDX1
DNAJB1	0.00829087	1.25479	0.636	0.63	1	HSPHi-Dying	DNAJB1
IKBIP	0.00833257	0.464014	0.045	0.334	1	HSPHi-Dying	IKBIP
SRPRA	0.00836311	0.49619	0.045	0.333	1	HSPHi-Dying	SRPRA
CCL31	0.00850193	0.509622	0.682	0.592	1	HSPHi-Dying	CCL3
YBX3	0.00853791	0.391364	0.091	0.418	1	HSPHi-Dying	YBX3
PEPD	0.00858017	0.461526	0.045	0.332	1	HSPHi-Dying	PEPD
NAA20	0.00862561	0.636383	0.045	0.332	1	HSPHi-Dying	NAA20
ARPC5L	0.0086658	0.343137	0.045	0.331	1	HSPHi-Dying	ARPC5L
MAP2K1	0.00876192	0.552502	0.091	0.418	1	HSPHi-Dying	MAP2K1
SLC38A21	0.00886909	0.513813	0.091	0.416	1	HSPHi-Dying	SLC38A2
NCOR2	0.00891739	0.410797	0.045	0.33	1	HSPHi-Dying	NCOR2
CLINT1	0.00906159	0.458595	0.045	0.329	1	HSPHi-Dying	CLINT1
DDX39A	0.00908548	0.481762	0.045	0.329	1	HSPHi-Dying	DDX39A
VPS26A	0.00943771	0.399315	0.045	0.327	1	HSPHi-Dying	VPS26A
TRIB1	0.00958032	0.753638	0.091	0.414	1	HSPHi-Dying	TRIB1
NOP58	0.00964853	0.558128	0.045	0.326	1	HSPHi-Dying	NOP58
SND1	0.00964853	0.598681	0.045	0.326	1	HSPHi-Dying	SND1
STARD7	0.00965375	0.35309	0.045	0.326	1	HSPHi-Dying	STARD7
IRAK3	0.00982602	0.430568	0.045	0.325	1	HSPHi-Dying	IRAK3
CCT2	0.00989602	0.891893	0.091	0.412	1	HSPHi-Dying	CCT2
PIAS1	0.00993487	1.07328	0.045	0.325	1	HSPHi-Dying	PIAS1

## Sheet: Fractions
SampleID	Condition	IDH_status	MGMT	cDC2-CD1C-CLEC10A-FCER1A	cDC1-CLEC9A-XCR1-BATF3	mDC-LAMP3-CCR7-CD80	Mo-DC1-CD14-FCER1A-CD1C-CLEC10A	Mo-DC2-CD14-C1QA-CD141	Mo-DC3-CD14-C1QA-IL1B	Mo-DC4-CD14-C1QA-CLEC10A	LowReads	HSPHi-Dying	Total
LB3018T	GBM.rec	WT	Un	2	0	0	3	14	8	1	1	0	29
LB3579T	GBM.rec	WT	Un	35	5	8	10	9	5	10	8	0	90
LB3612T	GBM.new	WT	Un	8	1	2	14	12	19	6	27	0	89
LB3667T	GBM.PD1	WT	Meth	15	6	8	69	40	41	8	11	0	198
LB3771T	GBM.new	WT	Meth	3	0	0	19	7	2	1	14	0	46
LB3836T	GBM.new	WT	Un	8	1	0	26	4	5	3	16	0	63
LB3851T	GBM.new	WT	Un	9	0	1	15	2	10	13	30	1	81
LB3853T	GBM.PD1	WT	Meth	8	4	0	48	22	23	1	11	1	118
LB3854T	GBM.new	WT	Un	2	0	0	11	21	8	4	5	0	51
LB3864T	GBM.PD1	WT	Un	5	1	3	23	27	25	13	10	0	107
LB3865T	GBM.new	WT	Un	8	7	1	7	5	4	14	1	0	47
LB3869T	GBM.PD1	WT	Un	2	1	1	8	18	9	5	9	0	53
LB3871T	GBM.rec	WT	Un	5	6	3	39	18	53	17	11	0	152
LB3872T	GBM.PD1	WT	Meth	14	8	6	26	13	17	20	2	0	106
LB3914T	GBM.PD1	WT	Un	8	13	4	24	13	16	31	9	0	118
LB3915T	GBM.new	WT	Meth	0	8	0	2	6	4	8	6	0	34
LB3931T	GBM.new	WT	Meth	7	5	8	3	1	0	1	2	0	27
LB3933T	GBM.new	WT	Un	4	2	0	11	5	9	13	9	0	53
LB3941T	GBM.new	WT	Un	4	2	0	4	2	6	3	2	0	23
LB3944T	GBM.PD1	WT	Un	6	5	3	11	10	10	9	1	0	55
LB3958T	GBM.rec	Mut	Meth	11	1	4	23	17	15	7	36	0	114
LB3963T	GBM.new	WT	Meth	2	3	3	3	2	5	10	67	19	114
LB3964T	GBM.rec	Mut	Un	9	2	3	10	3	4	2	8	0	41
LB4003T	GBM.PD1	WT	Un	7	15	5	4	6	10	10	2	0	59
LB4006T	GBM.PD1	WT	Un	2	19	1	1	1	0	1	0	0	25
LB4015T	GBM.rec	WT	Meth	0	1	1	2	5	2	2	4	0	17
LB4024T	GBM.PD1	WT	Un	7	3	1	1	1	1	0	6	0	20
LB4025T	GBM.PD1	Mut	Meth	41	26	43	24	6	5	30	43	0	218
LB4034T	GBM.new	WT	Un	1	5	5	3	10	14	4	14	0	56
LB4038T	GBM.new	WT	Un	5	5	4	5	7	8	10	51	1	96
LB4059T	GBM.rec	WT	Un	12	10	4	22	29	6	11	3	0	97
LB4075T	GBM.PD1	WT	Meth	8	2	2	9	21	16	7	10	0	75
LB4101T	GBM.rec	WT	Un	7	2	2	12	6	10	18	11	0	68
LB4102T	GBM.rec	Mut	Un	13	18	6	16	13	15	68	12	0	161
LB4112T	GBM.PD1	WT	Un	7	4	20	18	21	29	27	20	0	146
LB4117T	GBM.PD1	WT	Un	1	0	1	3	4	1	0	3	0	13
LB4130T	GBM.rec	WT	Meth	1	3	0	1	0	2	1	6	0	14
LB4143T	GBM.rec	WT	Meth	4	6	3	6	7	4	1	7	0	38
LB4177T	GBM.rec	Mut	Un	6	0	1	4	3	7	7	7	0	35
LB4180T	GBM.new	WT	Un	1	2	0	1	5	2	2	0	0	13

## Sheet: Fraction.p.val
	Type	new.vs.PD1.wilcox	rec.vs.PD1.wilcox
1	cDC2-CD1C-CLEC10A-FCER1A	0.550185	0.699627
2	cDC1-CLEC9A-XCR1-BATF3	0.580861	0.777113
3	mDC-LAMP3-CCR7-CD80	0.0120664	0.519984
4	Mo-DC1-CD14-FCER1A-CD1C-CLEC10A	0.634669	0.704507
5	Mo-DC2-CD14-C1QA-CD141	0.24563	0.595155
6	Mo-DC3-CD14-C1QA-IL1B	0.50514	0.667254
7	Mo-DC4-CD14-C1QA-CLEC10A	0.800464	0.777224

## Sheet: DEG
Gene	p_val	avg_logFC	pct.1	pct.2	p_val_adj	cluster	gene	diff	celltype
SPP1	4.94261e-11	1.79566	0.887	0.678	6.36212e-07	GBM.new	SPP1	0.209	cDC2-CD1C-CLEC10A-FCER1A
CXCL8	0.000540799	1.34498	0.5	0.326	1	GBM.new	CXCL8	0.174	cDC2-CD1C-CLEC10A-FCER1A
APOC1	0.00171335	1.08176	0.677	0.551	1	GBM.new	APOC1	0.126	cDC2-CD1C-CLEC10A-FCER1A
FNBP4	0.00196663	0.600022	0.29	0.542	1	GBM.new	FNBP4	-0.252	cDC2-CD1C-CLEC10A-FCER1A
RLF	0.00262616	0.692455	0.081	0.271	1	GBM.new	RLF	-0.19	cDC2-CD1C-CLEC10A-FCER1A
C9orf78	0.00584991	0.631259	0.323	0.585	1	GBM.new	C9orf78	-0.262	cDC2-CD1C-CLEC10A-FCER1A
NAA50	0.00777868	0.66859	0.161	0.364	1	GBM.new	NAA50	-0.203	cDC2-CD1C-CLEC10A-FCER1A
TRIM33	0.00885237	0.637649	0.161	0.377	1	GBM.new	TRIM33	-0.216	cDC2-CD1C-CLEC10A-FCER1A
DNAJC5B	6.05641e-13	0.655647	0.333	0.036	7.79582e-09	GBM.rec	DNAJC5B	0.297	cDC2-CD1C-CLEC10A-FCER1A
CD1A	6.56214e-12	0.881972	0.295	0.026	8.44678e-08	GBM.rec	CD1A	0.269	cDC2-CD1C-CLEC10A-FCER1A
PALLD	6.46813e-11	0.99595	0.438	0.135	8.32577e-07	GBM.rec	PALLD	0.303	cDC2-CD1C-CLEC10A-FCER1A
CLEC11A	3.1218e-10	1.12631	0.4	0.109	4.01838e-06	GBM.rec	CLEC11A	0.291	cDC2-CD1C-CLEC10A-FCER1A
MRC1	1.44098e-07	0.797053	0.41	0.145	0.00185483	GBM.rec	MRC1	0.265	cDC2-CD1C-CLEC10A-FCER1A
GSTM3	2.36869e-07	0.902517	0.381	0.14	0.00304897	GBM.rec	GSTM3	0.241	cDC2-CD1C-CLEC10A-FCER1A
FCER1A	2.45801e-07	0.637092	0.638	0.321	0.00316395	GBM.rec	FCER1A	0.317	cDC2-CD1C-CLEC10A-FCER1A
CD1C	2.82601e-06	0.929554	0.505	0.269	0.0363764	GBM.rec	CD1C	0.236	cDC2-CD1C-CLEC10A-FCER1A
OPN3	4.30445e-06	0.709507	0.429	0.218	0.0554069	GBM.rec	OPN3	0.211	cDC2-CD1C-CLEC10A-FCER1A
HIC1	2.31037e-05	0.643819	0.448	0.259	0.29739	GBM.rec	HIC1	0.189	cDC2-CD1C-CLEC10A-FCER1A
CD38	2.59746e-05	0.639056	0.41	0.223	0.334345	GBM.rec	CD38	0.187	cDC2-CD1C-CLEC10A-FCER1A
TMIGD3	8.70198e-05	0.694613	0.267	0.098	1	GBM.rec	TMIGD3	0.169	cDC2-CD1C-CLEC10A-FCER1A
FAM118A	0.000217302	0.753063	0.495	0.363	1	GBM.rec	FAM118A	0.132	cDC2-CD1C-CLEC10A-FCER1A
H2AFY	0.000704515	0.661139	0.819	0.782	1	GBM.rec	H2AFY	0.037	cDC2-CD1C-CLEC10A-FCER1A
NME2	0.000815442	0.655673	0.333	0.176	1	GBM.rec	NME2	0.157	cDC2-CD1C-CLEC10A-FCER1A
RNASEK	0.000875969	0.62096	0.41	0.249	1	GBM.rec	RNASEK	0.161	cDC2-CD1C-CLEC10A-FCER1A
IDO1	4.27244e-19	1.9319	0.519	0.066	5.49949e-15	GBM.PD1	IDO1	0.453	cDC2-CD1C-CLEC10A-FCER1A
CXCL9	8.5664e-17	1.51091	0.389	0.012	1.10267e-12	GBM.PD1	CXCL9	0.377	cDC2-CD1C-CLEC10A-FCER1A
GBP5	2.81554e-16	0.961898	0.435	0.048	3.62416e-12	GBM.PD1	GBP5	0.387	cDC2-CD1C-CLEC10A-FCER1A
GBP2	4.90804e-16	0.927743	0.641	0.222	6.31763e-12	GBM.PD1	GBP2	0.419	cDC2-CD1C-CLEC10A-FCER1A
STAT1	7.27725e-15	0.901675	0.71	0.329	9.36728e-11	GBM.PD1	STAT1	0.381	cDC2-CD1C-CLEC10A-FCER1A
VAMP5	1.38831e-14	1.10883	0.664	0.317	1.78703e-10	GBM.PD1	VAMP5	0.347	cDC2-CD1C-CLEC10A-FCER1A
GBP1	4.22357e-14	1.27157	0.534	0.168	5.43658e-10	GBM.PD1	GBP1	0.366	cDC2-CD1C-CLEC10A-FCER1A
PSME2	4.72347e-13	0.887429	0.901	0.731	6.08005e-09	GBM.PD1	PSME2	0.17	cDC2-CD1C-CLEC10A-FCER1A
FKBP5	7.32524e-13	0.756585	0.863	0.671	9.42905e-09	GBM.PD1	FKBP5	0.192	cDC2-CD1C-CLEC10A-FCER1A
ISG20	1.11365e-12	0.767533	0.756	0.419	1.43349e-08	GBM.PD1	ISG20	0.337	cDC2-CD1C-CLEC10A-FCER1A
LGALS2	4.2822e-11	0.994222	0.519	0.18	5.51205e-07	GBM.PD1	LGALS2	0.339	cDC2-CD1C-CLEC10A-FCER1A
WARS	9.74042e-11	0.755464	0.664	0.371	1.25379e-06	GBM.PD1	WARS	0.293	cDC2-CD1C-CLEC10A-FCER1A
GBP4	5.01661e-10	0.753672	0.496	0.198	6.45738e-06	GBM.PD1	GBP4	0.298	cDC2-CD1C-CLEC10A-FCER1A
MNDA	6.01915e-10	0.615761	0.718	0.389	7.74785e-06	GBM.PD1	MNDA	0.329	cDC2-CD1C-CLEC10A-FCER1A
RARRES3	6.57374e-10	0.859605	0.641	0.359	8.46171e-06	GBM.PD1	RARRES3	0.282	cDC2-CD1C-CLEC10A-FCER1A
CCL5	8.66563e-10	0.750442	0.374	0.078	1.11544e-05	GBM.PD1	CCL5	0.296	cDC2-CD1C-CLEC10A-FCER1A
TNFSF13B	6.22319e-09	0.596335	0.649	0.335	8.01049e-05	GBM.PD1	TNFSF13B	0.314	cDC2-CD1C-CLEC10A-FCER1A
PARP14	8.62123e-08	0.613437	0.618	0.401	0.00110972	GBM.PD1	PARP14	0.217	cDC2-CD1C-CLEC10A-FCER1A
IL32	1.36244e-07	0.624094	0.351	0.096	0.00175373	GBM.PD1	IL32	0.255	cDC2-CD1C-CLEC10A-FCER1A
DUSP4	2.21925e-05	0.65845	0.58	0.377	0.285662	GBM.PD1	DUSP4	0.203	cDC2-CD1C-CLEC10A-FCER1A
SRGAP2B	4.29004e-05	0.589405	0.496	0.275	0.552214	GBM.PD1	SRGAP2B	0.221	cDC2-CD1C-CLEC10A-FCER1A
RIPOR2	5.37854e-05	0.653152	0.45	0.281	0.692326	GBM.PD1	RIPOR2	0.169	cDC2-CD1C-CLEC10A-FCER1A
TXN	0.000800069	0.606266	0.786	0.671	1	GBM.PD1	TXN	0.115	cDC2-CD1C-CLEC10A-FCER1A
SPP1	1.999e-09	2.1225	0.902	0.547	2.57311e-05	GBM.new	SPP1	0.355	cDC1-CLEC9A-XCR1-BATF3
FCGBP	2.42302e-06	1.47942	0.415	0.112	0.0311891	GBM.new	FCGBP	0.303	cDC1-CLEC9A-XCR1-BATF3
CXCL8	9.35365e-06	1.18951	0.561	0.236	0.1204	GBM.new	CXCL8	0.325	cDC1-CLEC9A-XCR1-BATF3
TYROBP	1.45383e-05	1.12164	0.805	0.609	0.187136	GBM.new	TYROBP	0.196	cDC1-CLEC9A-XCR1-BATF3
C1QB	0.000257843	1.02334	0.732	0.503	1	GBM.new	C1QB	0.229	cDC1-CLEC9A-XCR1-BATF3
C1QA	0.000318133	1.21717	0.683	0.466	1	GBM.new	C1QA	0.217	cDC1-CLEC9A-XCR1-BATF3
SLC11A1	0.000377141	1.3886	0.415	0.168	1	GBM.new	SLC11A1	0.247	cDC1-CLEC9A-XCR1-BATF3
RNASE6	0.000539581	0.698764	0.707	0.516	1	GBM.new	RNASE6	0.191	cDC1-CLEC9A-XCR1-BATF3
HAMP	0.000742598	0.663588	0.317	0.112	1	GBM.new	HAMP	0.205	cDC1-CLEC9A-XCR1-BATF3
ALOX5AP	0.000964252	1.36918	0.463	0.248	1	GBM.new	ALOX5AP	0.215	cDC1-CLEC9A-XCR1-BATF3
IL1B	0.00140228	1.02177	0.537	0.28	1	GBM.new	IL1B	0.257	cDC1-CLEC9A-XCR1-BATF3
CXCL2	0.00217537	1.17452	0.268	0.093	1	GBM.new	CXCL2	0.175	cDC1-CLEC9A-XCR1-BATF3
CTSB	0.00292859	0.954059	0.683	0.59	1	GBM.new	CTSB	0.093	cDC1-CLEC9A-XCR1-BATF3
FCER1G	0.00299853	0.852823	0.683	0.609	1	GBM.new	FCER1G	0.074	cDC1-CLEC9A-XCR1-BATF3
MS4A6A	0.00556119	0.689361	0.732	0.596	1	GBM.new	MS4A6A	0.136	cDC1-CLEC9A-XCR1-BATF3
TREM2	0.00848475	0.736359	0.366	0.193	1	GBM.new	TREM2	0.173	cDC1-CLEC9A-XCR1-BATF3
TACSTD2	8.05106e-09	0.778428	0.593	0.176	0.000103633	GBM.rec	TACSTD2	0.417	cDC1-CLEC9A-XCR1-BATF3
RNASEK	2.87896e-06	0.904396	0.537	0.236	0.037058	GBM.rec	RNASEK	0.301	cDC1-CLEC9A-XCR1-BATF3
EGR1	1.83604e-05	0.586293	0.593	0.291	0.236335	GBM.rec	EGR1	0.302	cDC1-CLEC9A-XCR1-BATF3
CD68	7.07634e-05	0.863217	0.685	0.507	0.910866	GBM.rec	CD68	0.178	cDC1-CLEC9A-XCR1-BATF3
SQSTM1	8.35687e-05	0.599842	0.685	0.527	1	GBM.rec	SQSTM1	0.158	cDC1-CLEC9A-XCR1-BATF3
METTL17	0.000209518	0.688676	0.315	0.108	1	GBM.rec	METTL17	0.207	cDC1-CLEC9A-XCR1-BATF3
NME2	0.000222785	0.775133	0.463	0.223	1	GBM.rec	NME2	0.24	cDC1-CLEC9A-XCR1-BATF3
IFITM3	0.000346149	0.930865	0.537	0.311	1	GBM.rec	IFITM3	0.226	cDC1-CLEC9A-XCR1-BATF3
C1QC	0.000362501	0.748686	0.574	0.351	1	GBM.rec	C1QC	0.223	cDC1-CLEC9A-XCR1-BATF3
GNG10	0.000417985	0.650513	0.426	0.196	1	GBM.rec	GNG10	0.23	cDC1-CLEC9A-XCR1-BATF3
GABARAP	0.000476645	0.98015	0.685	0.534	1	GBM.rec	GABARAP	0.151	cDC1-CLEC9A-XCR1-BATF3
MIF	0.000544314	0.608172	0.778	0.574	1	GBM.rec	MIF	0.204	cDC1-CLEC9A-XCR1-BATF3
BANP	0.00216392	0.780904	0.37	0.189	1	GBM.rec	BANP	0.181	cDC1-CLEC9A-XCR1-BATF3
ALDOA	0.0026581	0.771985	0.426	0.257	1	GBM.rec	ALDOA	0.169	cDC1-CLEC9A-XCR1-BATF3
GPR157	0.00298714	0.592995	0.463	0.277	1	GBM.rec	GPR157	0.186	cDC1-CLEC9A-XCR1-BATF3
ARRB2	0.00671111	0.60081	0.667	0.48	1	GBM.rec	ARRB2	0.187	cDC1-CLEC9A-XCR1-BATF3
ETV6	0.00812588	0.719644	0.704	0.568	1	GBM.rec	ETV6	0.136	cDC1-CLEC9A-XCR1-BATF3
IDO1	8.31728e-10	1.10454	0.794	0.368	1.0706e-05	GBM.PD1	IDO1	0.426	cDC1-CLEC9A-XCR1-BATF3
ZNF366	2.48218e-08	0.970916	0.439	0.105	0.000319507	GBM.PD1	ZNF366	0.334	cDC1-CLEC9A-XCR1-BATF3
XCR1	2.8041e-08	0.693603	0.28	0	0.000360943	GBM.PD1	XCR1	0.28	cDC1-CLEC9A-XCR1-BATF3
CLNK	5.08859e-08	0.995334	0.607	0.253	0.000655003	GBM.PD1	CLNK	0.354	cDC1-CLEC9A-XCR1-BATF3
IRF1	7.55758e-08	1.21085	0.682	0.411	0.000972812	GBM.PD1	IRF1	0.271	cDC1-CLEC9A-XCR1-BATF3
EIF5A	8.18228e-08	0.694565	0.766	0.558	0.00105322	GBM.PD1	EIF5A	0.208	cDC1-CLEC9A-XCR1-BATF3
CXCL9	1.9099e-07	1.727	0.374	0.074	0.00245842	GBM.PD1	CXCL9	0.3	cDC1-CLEC9A-XCR1-BATF3
CCSER1	3.84151e-07	0.763133	0.505	0.168	0.00494479	GBM.PD1	CCSER1	0.337	cDC1-CLEC9A-XCR1-BATF3
LYZ	5.4535e-07	0.837768	0.879	0.758	0.00701975	GBM.PD1	LYZ	0.121	cDC1-CLEC9A-XCR1-BATF3
PAWR	1.76133e-06	0.617767	0.355	0.084	0.0226719	GBM.PD1	PAWR	0.271	cDC1-CLEC9A-XCR1-BATF3
SNTB2	6.52108e-06	0.625739	0.28	0.042	0.0839393	GBM.PD1	SNTB2	0.238	cDC1-CLEC9A-XCR1-BATF3
WARS	8.13003e-06	1.05538	0.701	0.505	0.10465	GBM.PD1	WARS	0.196	cDC1-CLEC9A-XCR1-BATF3
LRRK2	2.48353e-05	0.774637	0.542	0.316	0.31968	GBM.PD1	LRRK2	0.226	cDC1-CLEC9A-XCR1-BATF3
EFHD2	5.39318e-05	0.819417	0.804	0.632	0.69421	GBM.PD1	EFHD2	0.172	cDC1-CLEC9A-XCR1-BATF3
GBP1	5.70672e-05	1.00734	0.346	0.126	0.734569	GBM.PD1	GBP1	0.22	cDC1-CLEC9A-XCR1-BATF3
STAT1	6.1158e-05	0.742005	0.523	0.326	0.787225	GBM.PD1	STAT1	0.197	cDC1-CLEC9A-XCR1-BATF3
NRBF2	0.000107843	0.597803	0.579	0.295	1	GBM.PD1	NRBF2	0.284	cDC1-CLEC9A-XCR1-BATF3
VAMP5	0.000113465	0.717216	0.664	0.453	1	GBM.PD1	VAMP5	0.211	cDC1-CLEC9A-XCR1-BATF3
RAB29	0.000117024	0.656971	0.645	0.474	1	GBM.PD1	RAB29	0.171	cDC1-CLEC9A-XCR1-BATF3
KMT2A	0.000118522	0.596078	0.43	0.211	1	GBM.PD1	KMT2A	0.219	cDC1-CLEC9A-XCR1-BATF3
SRP19	0.000133666	0.69211	0.692	0.495	1	GBM.PD1	SRP19	0.197	cDC1-CLEC9A-XCR1-BATF3
CDV3	0.000142046	0.74164	0.682	0.495	1	GBM.PD1	CDV3	0.187	cDC1-CLEC9A-XCR1-BATF3
TMOD3	0.000175392	0.664174	0.477	0.263	1	GBM.PD1	TMOD3	0.214	cDC1-CLEC9A-XCR1-BATF3
LAP3	0.000178438	0.627957	0.738	0.611	1	GBM.PD1	LAP3	0.127	cDC1-CLEC9A-XCR1-BATF3
SHTN1	0.000197722	0.58624	0.766	0.621	1	GBM.PD1	SHTN1	0.145	cDC1-CLEC9A-XCR1-BATF3
TAP1	0.000222075	0.613314	0.766	0.642	1	GBM.PD1	TAP1	0.124	cDC1-CLEC9A-XCR1-BATF3
SLC24A4	0.000245849	0.893012	0.439	0.242	1	GBM.PD1	SLC24A4	0.197	cDC1-CLEC9A-XCR1-BATF3
MARCKSL1	0.000250862	0.848939	0.533	0.305	1	GBM.PD1	MARCKSL1	0.228	cDC1-CLEC9A-XCR1-BATF3
CYTOR	0.000383052	0.606397	0.738	0.537	1	GBM.PD1	CYTOR	0.201	cDC1-CLEC9A-XCR1-BATF3
PARP14	0.000927312	0.868275	0.439	0.274	1	GBM.PD1	PARP14	0.165	cDC1-CLEC9A-XCR1-BATF3
CCL5	0.00105188	0.818092	0.252	0.084	1	GBM.PD1	CCL5	0.168	cDC1-CLEC9A-XCR1-BATF3
GALNT7	0.00109656	0.753869	0.336	0.158	1	GBM.PD1	GALNT7	0.178	cDC1-CLEC9A-XCR1-BATF3
LPGAT1	0.00126275	0.657457	0.449	0.274	1	GBM.PD1	LPGAT1	0.175	cDC1-CLEC9A-XCR1-BATF3
ECI1	0.00127613	0.630019	0.383	0.189	1	GBM.PD1	ECI1	0.194	cDC1-CLEC9A-XCR1-BATF3
ATRX	0.00221237	0.630445	0.654	0.505	1	GBM.PD1	ATRX	0.149	cDC1-CLEC9A-XCR1-BATF3
NKTR	0.00273782	0.760935	0.579	0.389	1	GBM.PD1	NKTR	0.19	cDC1-CLEC9A-XCR1-BATF3
TXN	0.00299093	1.04589	0.785	0.695	1	GBM.PD1	TXN	0.09	cDC1-CLEC9A-XCR1-BATF3
TRA2A	0.00316009	0.812611	0.561	0.411	1	GBM.PD1	TRA2A	0.15	cDC1-CLEC9A-XCR1-BATF3
CREBRF	0.00354592	0.621228	0.402	0.232	1	GBM.PD1	CREBRF	0.17	cDC1-CLEC9A-XCR1-BATF3
PLCG2	0.00417102	1.74804	0.514	0.379	1	GBM.PD1	PLCG2	0.135	cDC1-CLEC9A-XCR1-BATF3
SNX5	0.00423616	0.706993	0.589	0.421	1	GBM.PD1	SNX5	0.168	cDC1-CLEC9A-XCR1-BATF3
CDK9	0.00717617	0.770729	0.28	0.137	1	GBM.PD1	CDK9	0.143	cDC1-CLEC9A-XCR1-BATF3
SETX	0.00843333	0.607744	0.505	0.337	1	GBM.PD1	SETX	0.168	cDC1-CLEC9A-XCR1-BATF3
PCLAF	2.80125e-06	1.75073	0.292	0.03	0.0360577	GBM.new	PCLAF	0.262	mDC-LAMP3-CCR7-CD80
SPP1	3.48275e-06	2.29655	0.833	0.564	0.04483	GBM.new	SPP1	0.269	mDC-LAMP3-CCR7-CD80
WASF2	0.000762899	0.815982	0.208	0.684	1	GBM.new	WASF2	-0.476	mDC-LAMP3-CCR7-CD80
MAP1LC3B	0.000994811	0.624737	0.208	0.654	1	GBM.new	MAP1LC3B	-0.446	mDC-LAMP3-CCR7-CD80
CCT2	0.00190107	0.950299	0.083	0.436	1	GBM.new	CCT2	-0.353	mDC-LAMP3-CCR7-CD80
TMEM59	0.00200064	0.741724	0.208	0.609	1	GBM.new	TMEM59	-0.401	mDC-LAMP3-CCR7-CD80
MRPL57	0.00233932	0.649379	0.167	0.541	1	GBM.new	MRPL57	-0.374	mDC-LAMP3-CCR7-CD80
NECAP2	0.00304023	0.726625	0.167	0.586	1	GBM.new	NECAP2	-0.419	mDC-LAMP3-CCR7-CD80
TMEM259	0.00307451	0.591677	0.083	0.436	1	GBM.new	TMEM259	-0.353	mDC-LAMP3-CCR7-CD80
SMCO4	0.00366162	0.61553	0.167	0.556	1	GBM.new	SMCO4	-0.389	mDC-LAMP3-CCR7-CD80
IRF8	0.00518477	0.597112	0.208	0.594	1	GBM.new	IRF8	-0.386	mDC-LAMP3-CCR7-CD80
DCTN2	0.00537555	0.697733	0.125	0.444	1	GBM.new	DCTN2	-0.319	mDC-LAMP3-CCR7-CD80
CCAR1	0.00576649	0.868063	0.167	0.526	1	GBM.new	CCAR1	-0.359	mDC-LAMP3-CCR7-CD80
PPM1K	0.00578987	0.666006	0.125	0.459	1	GBM.new	PPM1K	-0.334	mDC-LAMP3-CCR7-CD80
GTF2A2	0.0068378	0.854317	0.125	0.459	1	GBM.new	GTF2A2	-0.334	mDC-LAMP3-CCR7-CD80
CEBPD	0.00692095	0.80108	0.333	0.729	1	GBM.new	CEBPD	-0.396	mDC-LAMP3-CCR7-CD80
SEM1	0.00721144	0.673472	0.292	0.699	1	GBM.new	SEM1	-0.407	mDC-LAMP3-CCR7-CD80
TPP1	0.00863655	0.797994	0.167	0.549	1	GBM.new	TPP1	-0.382	mDC-LAMP3-CCR7-CD80
NECTIN2	0.00902858	0.635009	0.208	0.571	1	GBM.new	NECTIN2	-0.363	mDC-LAMP3-CCR7-CD80
PPP1CC	0.00979533	0.630743	0.042	0.316	1	GBM.new	PPP1CC	-0.274	mDC-LAMP3-CCR7-CD80
EGR1	0.000115821	0.872468	0.457	0.172	1	GBM.rec	EGR1	0.285	mDC-LAMP3-CCR7-CD80
UNC50	0.00125376	0.647466	0.314	0.098	1	GBM.rec	UNC50	0.216	mDC-LAMP3-CCR7-CD80
RAMP1	0.00139991	0.66406	0.371	0.148	1	GBM.rec	RAMP1	0.223	mDC-LAMP3-CCR7-CD80
IRF2BP2	0.0021074	0.779861	0.543	0.303	1	GBM.rec	IRF2BP2	0.24	mDC-LAMP3-CCR7-CD80
LGMN	0.00431364	0.796674	0.514	0.287	1	GBM.rec	LGMN	0.227	mDC-LAMP3-CCR7-CD80
ADAP2	0.0087489	0.756318	0.514	0.311	1	GBM.rec	ADAP2	0.203	mDC-LAMP3-CCR7-CD80
CXCL9	1.43111e-15	2.7822	0.755	0.068	1.84212e-11	GBM.PD1	CXCL9	0.687	mDC-LAMP3-CCR7-CD80
IDO1	2.83288e-14	1.74568	0.816	0.153	3.64649e-10	GBM.PD1	IDO1	0.663	mDC-LAMP3-CCR7-CD80
VAMP5	2.1095e-13	1.52486	0.796	0.237	2.71535e-09	GBM.PD1	VAMP5	0.559	mDC-LAMP3-CCR7-CD80
GBP1	7.87099e-12	1.52922	0.837	0.339	1.01315e-07	GBM.PD1	GBP1	0.498	mDC-LAMP3-CCR7-CD80
RARRES3	2.8351e-11	0.934756	0.714	0.169	3.64934e-07	GBM.PD1	RARRES3	0.545	mDC-LAMP3-CCR7-CD80
STAT1	8.76212e-11	1.16831	0.827	0.322	1.12786e-06	GBM.PD1	STAT1	0.505	mDC-LAMP3-CCR7-CD80
PSME2	2.25307e-10	1.11243	0.867	0.441	2.90016e-06	GBM.PD1	PSME2	0.426	mDC-LAMP3-CCR7-CD80
HAPLN3	6.21344e-10	0.795133	0.643	0.136	7.99794e-06	GBM.PD1	HAPLN3	0.507	mDC-LAMP3-CCR7-CD80
PSMB9	6.50661e-10	0.590467	0.867	0.424	8.37531e-06	GBM.PD1	PSMB9	0.443	mDC-LAMP3-CCR7-CD80
CXCL10	7.31588e-10	2.00994	0.622	0.102	9.417e-06	GBM.PD1	CXCL10	0.52	mDC-LAMP3-CCR7-CD80
GBP5	1.49832e-09	1.60935	0.571	0.102	1.92864e-05	GBM.PD1	GBP5	0.469	mDC-LAMP3-CCR7-CD80
GBP4	2.10354e-09	1.14439	0.684	0.203	2.70768e-05	GBM.PD1	GBP4	0.481	mDC-LAMP3-CCR7-CD80
LAP3	5.57894e-09	0.82842	0.878	0.458	7.18121e-05	GBM.PD1	LAP3	0.42	mDC-LAMP3-CCR7-CD80
CXCL11	2.18191e-08	1.51211	0.449	0.017	0.000280856	GBM.PD1	CXCL11	0.432	mDC-LAMP3-CCR7-CD80
PPA1	2.60676e-08	0.972506	0.888	0.508	0.000335543	GBM.PD1	PPA1	0.38	mDC-LAMP3-CCR7-CD80
PARP14	5.17943e-08	0.90631	0.816	0.39	0.000666696	GBM.PD1	PARP14	0.426	mDC-LAMP3-CCR7-CD80
RNF213	6.43839e-08	0.990944	0.765	0.339	0.00082875	GBM.PD1	RNF213	0.426	mDC-LAMP3-CCR7-CD80
HLA-E	8.06288e-08	0.614935	0.959	0.644	0.00103785	GBM.PD1	HLA-E	0.315	mDC-LAMP3-CCR7-CD80
ISG20	9.12562e-08	0.940735	0.735	0.322	0.00117465	GBM.PD1	ISG20	0.413	mDC-LAMP3-CCR7-CD80
NOP53	9.75685e-08	0.828622	0.827	0.407	0.0012559	GBM.PD1	NOP53	0.42	mDC-LAMP3-CCR7-CD80
CCL19	2.83893e-07	2.27651	0.357	0	0.00365427	GBM.PD1	CCL19	0.357	mDC-LAMP3-CCR7-CD80
IRF7	3.2039e-07	0.803739	0.571	0.169	0.00412406	GBM.PD1	IRF7	0.402	mDC-LAMP3-CCR7-CD80
CASP1	3.73843e-07	0.644066	0.551	0.119	0.0048121	GBM.PD1	CASP1	0.432	mDC-LAMP3-CCR7-CD80
RAB7A	4.1539e-07	0.693437	0.755	0.322	0.0053469	GBM.PD1	RAB7A	0.433	mDC-LAMP3-CCR7-CD80
TNFRSF14	4.23614e-07	0.686096	0.694	0.305	0.00545276	GBM.PD1	TNFRSF14	0.389	mDC-LAMP3-CCR7-CD80
ANKRD12	4.28296e-07	0.790955	0.776	0.373	0.00551302	GBM.PD1	ANKRD12	0.403	mDC-LAMP3-CCR7-CD80
EIF1AY	4.39909e-07	0.718828	0.469	0.085	0.00566251	GBM.PD1	EIF1AY	0.384	mDC-LAMP3-CCR7-CD80
HLA-A	5.14802e-07	0.612483	0.969	0.627	0.00662654	GBM.PD1	HLA-A	0.342	mDC-LAMP3-CCR7-CD80
SPPL2A	5.35441e-07	0.805324	0.714	0.288	0.0068922	GBM.PD1	SPPL2A	0.426	mDC-LAMP3-CCR7-CD80
SLAMF8	7.63161e-07	0.752224	0.388	0.034	0.0098234	GBM.PD1	SLAMF8	0.354	mDC-LAMP3-CCR7-CD80
LY6E	8.94979e-07	0.91088	0.653	0.288	0.0115202	GBM.PD1	LY6E	0.365	mDC-LAMP3-CCR7-CD80
GBP2	1.25487e-06	0.77723	0.724	0.424	0.0161527	GBM.PD1	GBP2	0.3	mDC-LAMP3-CCR7-CD80
FAM107B	1.41292e-06	0.715942	0.582	0.186	0.0181872	GBM.PD1	FAM107B	0.396	mDC-LAMP3-CCR7-CD80
CUL1	2.16235e-06	0.633113	0.633	0.22	0.0278338	GBM.PD1	CUL1	0.413	mDC-LAMP3-CCR7-CD80
ATOX1	2.4695e-06	0.84501	0.816	0.407	0.0317873	GBM.PD1	ATOX1	0.409	mDC-LAMP3-CCR7-CD80
ATF5	2.653e-06	0.677564	0.684	0.271	0.0341494	GBM.PD1	ATF5	0.413	mDC-LAMP3-CCR7-CD80
WARS	2.71958e-06	1.13689	0.745	0.424	0.0350065	GBM.PD1	WARS	0.321	mDC-LAMP3-CCR7-CD80
UBD	2.75053e-06	0.809862	0.418	0.051	0.0354048	GBM.PD1	UBD	0.367	mDC-LAMP3-CCR7-CD80
TNFSF10	2.80961e-06	0.600544	0.459	0.085	0.0361653	GBM.PD1	TNFSF10	0.374	mDC-LAMP3-CCR7-CD80
GCH1	3.45738e-06	0.804588	0.378	0.051	0.0445034	GBM.PD1	GCH1	0.327	mDC-LAMP3-CCR7-CD80
CIITA	3.74747e-06	0.663385	0.684	0.305	0.0482374	GBM.PD1	CIITA	0.379	mDC-LAMP3-CCR7-CD80
SLCO5A1	4.68617e-06	0.660568	0.296	0	0.0603204	GBM.PD1	SLCO5A1	0.296	mDC-LAMP3-CCR7-CD80
CCL5	4.91556e-06	1.13544	0.418	0.068	0.0632731	GBM.PD1	CCL5	0.35	mDC-LAMP3-CCR7-CD80
TNFSF13B	5.9096e-06	0.661501	0.684	0.305	0.0760684	GBM.PD1	TNFSF13B	0.379	mDC-LAMP3-CCR7-CD80
TERF2IP	6.10843e-06	0.692629	0.571	0.203	0.0786277	GBM.PD1	TERF2IP	0.368	mDC-LAMP3-CCR7-CD80
TRAPPC3	6.99678e-06	0.630684	0.52	0.169	0.0900625	GBM.PD1	TRAPPC3	0.351	mDC-LAMP3-CCR7-CD80
LYST	7.72005e-06	0.588834	0.561	0.169	0.0993725	GBM.PD1	LYST	0.392	mDC-LAMP3-CCR7-CD80
BBX	8.06566e-06	0.593132	0.551	0.22	0.103821	GBM.PD1	BBX	0.331	mDC-LAMP3-CCR7-CD80
ARHGAP30	8.38506e-06	0.595655	0.592	0.237	0.107932	GBM.PD1	ARHGAP30	0.355	mDC-LAMP3-CCR7-CD80
TMEM179B	9.34047e-06	0.610783	0.5	0.153	0.120231	GBM.PD1	TMEM179B	0.347	mDC-LAMP3-CCR7-CD80
SERPING1	9.58969e-06	1.06526	0.439	0.102	0.123438	GBM.PD1	SERPING1	0.337	mDC-LAMP3-CCR7-CD80
SOCS1	9.99945e-06	0.813099	0.622	0.288	0.128713	GBM.PD1	SOCS1	0.334	mDC-LAMP3-CCR7-CD80
EPSTI1	1.04919e-05	0.604687	0.786	0.407	0.135051	GBM.PD1	EPSTI1	0.379	mDC-LAMP3-CCR7-CD80
IFITM3	1.05806e-05	0.936733	0.745	0.407	0.136193	GBM.PD1	IFITM3	0.338	mDC-LAMP3-CCR7-CD80
NFE2L3	1.42432e-05	0.608003	0.378	0.068	0.183338	GBM.PD1	NFE2L3	0.31	mDC-LAMP3-CCR7-CD80
CD40	1.67175e-05	0.906454	0.684	0.322	0.215188	GBM.PD1	CD40	0.362	mDC-LAMP3-CCR7-CD80
CASP4	1.73228e-05	0.62525	0.592	0.271	0.222979	GBM.PD1	CASP4	0.321	mDC-LAMP3-CCR7-CD80
RUFY3	1.9017e-05	0.659689	0.551	0.186	0.244787	GBM.PD1	RUFY3	0.365	mDC-LAMP3-CCR7-CD80
TXN	2.49482e-05	0.771756	0.949	0.576	0.321133	GBM.PD1	TXN	0.373	mDC-LAMP3-CCR7-CD80
CALHM6	2.69119e-05	1.20049	0.602	0.305	0.34641	GBM.PD1	CALHM6	0.297	mDC-LAMP3-CCR7-CD80
IL32	2.70921e-05	0.585192	0.592	0.22	0.348729	GBM.PD1	IL32	0.372	mDC-LAMP3-CCR7-CD80
RIPK2	2.90849e-05	0.653234	0.633	0.271	0.374381	GBM.PD1	RIPK2	0.362	mDC-LAMP3-CCR7-CD80
IL7R	2.94139e-05	0.849212	0.612	0.254	0.378616	GBM.PD1	IL7R	0.358	mDC-LAMP3-CCR7-CD80
TMEM176A	2.95829e-05	0.995789	0.592	0.254	0.380791	GBM.PD1	TMEM176A	0.338	mDC-LAMP3-CCR7-CD80
SLC31A2	3.10712e-05	0.833232	0.592	0.305	0.399949	GBM.PD1	SLC31A2	0.287	mDC-LAMP3-CCR7-CD80
SERPINB1	3.18365e-05	0.957942	0.765	0.492	0.4098	GBM.PD1	SERPINB1	0.273	mDC-LAMP3-CCR7-CD80
PLEKHO1	3.47101e-05	0.613764	0.745	0.407	0.446788	GBM.PD1	PLEKHO1	0.338	mDC-LAMP3-CCR7-CD80
TCOF1	3.7315e-05	0.605711	0.459	0.119	0.480319	GBM.PD1	TCOF1	0.34	mDC-LAMP3-CCR7-CD80
PAK2	3.92593e-05	0.658855	0.643	0.288	0.505345	GBM.PD1	PAK2	0.355	mDC-LAMP3-CCR7-CD80
IFITM2	5.05653e-05	0.671223	0.663	0.339	0.650876	GBM.PD1	IFITM2	0.324	mDC-LAMP3-CCR7-CD80
HLA-F	5.27973e-05	0.596914	0.755	0.407	0.679607	GBM.PD1	HLA-F	0.348	mDC-LAMP3-CCR7-CD80
ODF3B	5.51412e-05	0.624656	0.541	0.22	0.709777	GBM.PD1	ODF3B	0.321	mDC-LAMP3-CCR7-CD80
TPR	5.62018e-05	0.715352	0.673	0.322	0.723429	GBM.PD1	TPR	0.351	mDC-LAMP3-CCR7-CD80
PNISR	5.65975e-05	0.600808	0.776	0.424	0.728524	GBM.PD1	PNISR	0.352	mDC-LAMP3-CCR7-CD80
GLRX	6.16084e-05	0.82156	0.48	0.169	0.793023	GBM.PD1	GLRX	0.311	mDC-LAMP3-CCR7-CD80
FCGR1A	6.68768e-05	0.638073	0.429	0.119	0.860838	GBM.PD1	FCGR1A	0.31	mDC-LAMP3-CCR7-CD80
PDAP1	6.86401e-05	0.64004	0.582	0.254	0.883535	GBM.PD1	PDAP1	0.328	mDC-LAMP3-CCR7-CD80
PRELID1	8.72399e-05	0.655324	0.653	0.39	1	GBM.PD1	PRELID1	0.263	mDC-LAMP3-CCR7-CD80
APOL6	8.97524e-05	0.591475	0.459	0.153	1	GBM.PD1	APOL6	0.306	mDC-LAMP3-CCR7-CD80
UBE2L6	9.12884e-05	0.666511	0.633	0.322	1	GBM.PD1	UBE2L6	0.311	mDC-LAMP3-CCR7-CD80
GRINA	0.000301494	0.696904	0.765	0.458	1	GBM.PD1	GRINA	0.307	mDC-LAMP3-CCR7-CD80
OPTN	0.000327169	0.63343	0.327	0.085	1	GBM.PD1	OPTN	0.242	mDC-LAMP3-CCR7-CD80
CLINT1	0.000395709	0.64603	0.5	0.22	1	GBM.PD1	CLINT1	0.28	mDC-LAMP3-CCR7-CD80
BAZ2A	0.000406399	0.613048	0.469	0.203	1	GBM.PD1	BAZ2A	0.266	mDC-LAMP3-CCR7-CD80
IER3	0.00043707	0.606452	0.816	0.458	1	GBM.PD1	IER3	0.358	mDC-LAMP3-CCR7-CD80
TMEM176B	0.000602098	0.620064	0.633	0.339	1	GBM.PD1	TMEM176B	0.294	mDC-LAMP3-CCR7-CD80
LPP	0.000678455	0.694113	0.51	0.237	1	GBM.PD1	LPP	0.273	mDC-LAMP3-CCR7-CD80
SERPINA1	0.000733094	1.22273	0.48	0.22	1	GBM.PD1	SERPINA1	0.26	mDC-LAMP3-CCR7-CD80
BIRC3	0.00102674	0.612088	0.735	0.441	1	GBM.PD1	BIRC3	0.294	mDC-LAMP3-CCR7-CD80
CLEC4E	0.00123003	0.863744	0.296	0.085	1	GBM.PD1	CLEC4E	0.211	mDC-LAMP3-CCR7-CD80
CLNS1A	0.00125963	0.598826	0.612	0.322	1	GBM.PD1	CLNS1A	0.29	mDC-LAMP3-CCR7-CD80
WDR33	0.00133672	0.588467	0.633	0.339	1	GBM.PD1	WDR33	0.294	mDC-LAMP3-CCR7-CD80
PCNX1	0.00172474	0.603393	0.459	0.22	1	GBM.PD1	PCNX1	0.239	mDC-LAMP3-CCR7-CD80
IFITM1	0.00328194	0.93501	0.296	0.102	1	GBM.PD1	IFITM1	0.194	mDC-LAMP3-CCR7-CD80
EBI3	0.00652653	0.611363	0.602	0.339	1	GBM.PD1	EBI3	0.263	mDC-LAMP3-CCR7-CD80
SPP1	2.28627e-10	1.27383	0.79	0.782	2.94288e-06	GBM.new	SPP1	0.008	Mo-DC1-CD14-FCER1A-CD1C-CLEC10A
S100A8	7.92916e-07	1.11834	0.315	0.137	0.0102064	GBM.new	S100A8	0.178	Mo-DC1-CD14-FCER1A-CD1C-CLEC10A
VCAN	3.93012e-05	0.830814	0.274	0.127	0.505886	GBM.new	VCAN	0.147	Mo-DC1-CD14-FCER1A-CD1C-CLEC10A
G0S2	0.000192783	1.08131	0.492	0.348	1	GBM.new	G0S2	0.144	Mo-DC1-CD14-FCER1A-CD1C-CLEC10A
HAMP	0.000299312	0.710711	0.282	0.153	1	GBM.new	HAMP	0.129	Mo-DC1-CD14-FCER1A-CD1C-CLEC10A
ALOX5AP	0.00124054	0.792908	0.694	0.89	1	GBM.new	ALOX5AP	-0.196	Mo-DC1-CD14-FCER1A-CD1C-CLEC10A
CD14	0.00437926	0.80015	0.621	0.631	1	GBM.new	CD14	-0.01	Mo-DC1-CD14-FCER1A-CD1C-CLEC10A
HLA-DRB5	5.74273e-17	0.723189	0.878	0.455	7.39204e-13	GBM.rec	HLA-DRB5	0.423	Mo-DC1-CD14-FCER1A-CD1C-CLEC10A
HLA-DQA2	8.25497e-12	0.601764	0.412	0.15	1.06258e-07	GBM.rec	HLA-DQA2	0.262	Mo-DC1-CD14-FCER1A-CD1C-CLEC10A
LGALS3BP	3.6827e-06	0.809978	0.473	0.285	0.0474037	GBM.rec	LGALS3BP	0.188	Mo-DC1-CD14-FCER1A-CD1C-CLEC10A
NFKB1	4.09206e-06	0.658396	0.655	0.552	0.052673	GBM.rec	NFKB1	0.103	Mo-DC1-CD14-FCER1A-CD1C-CLEC10A
IFIT3	8.25719e-06	0.593433	0.264	0.117	0.106287	GBM.rec	IFIT3	0.147	Mo-DC1-CD14-FCER1A-CD1C-CLEC10A
IFI27	8.4242e-06	1.64381	0.304	0.155	0.108436	GBM.rec	IFI27	0.149	Mo-DC1-CD14-FCER1A-CD1C-CLEC10A
LY6E	1.0552e-05	0.69577	0.716	0.542	0.135825	GBM.rec	LY6E	0.174	Mo-DC1-CD14-FCER1A-CD1C-CLEC10A
C1QC	1.57196e-05	0.744414	0.73	0.573	0.202342	GBM.rec	C1QC	0.157	Mo-DC1-CD14-FCER1A-CD1C-CLEC10A
IFI6	2.53901e-05	0.874121	0.649	0.499	0.326822	GBM.rec	IFI6	0.15	Mo-DC1-CD14-FCER1A-CD1C-CLEC10A
C1QA	2.67825e-05	0.610235	0.831	0.692	0.344744	GBM.rec	C1QA	0.139	Mo-DC1-CD14-FCER1A-CD1C-CLEC10A
ISG15	0.000523004	1.25137	0.554	0.438	1	GBM.rec	ISG15	0.116	Mo-DC1-CD14-FCER1A-CD1C-CLEC10A
SOD2	0.000676212	0.788678	0.682	0.578	1	GBM.rec	SOD2	0.104	Mo-DC1-CD14-FCER1A-CD1C-CLEC10A
TREM2	0.00525496	0.585605	0.595	0.519	1	GBM.rec	TREM2	0.076	Mo-DC1-CD14-FCER1A-CD1C-CLEC10A
STK17B	1.98151e-23	0.608703	0.9	0.614	2.5506e-19	GBM.PD1	STK17B	0.286	Mo-DC1-CD14-FCER1A-CD1C-CLEC10A
ZFAND5	1.88928e-19	0.657412	0.948	0.706	2.43189e-15	GBM.PD1	ZFAND5	0.242	Mo-DC1-CD14-FCER1A-CD1C-CLEC10A
NCOA4	2.51545e-19	0.666881	0.777	0.478	3.23789e-15	GBM.PD1	NCOA4	0.299	Mo-DC1-CD14-FCER1A-CD1C-CLEC10A
FKBP5	2.6624e-19	0.601052	0.903	0.673	3.42704e-15	GBM.PD1	FKBP5	0.23	Mo-DC1-CD14-FCER1A-CD1C-CLEC10A
NLRP3	2.30859e-16	0.589596	0.851	0.551	2.97162e-12	GBM.PD1	NLRP3	0.3	Mo-DC1-CD14-FCER1A-CD1C-CLEC10A
STAT1	1.10714e-15	0.725988	0.561	0.25	1.42511e-11	GBM.PD1	STAT1	0.311	Mo-DC1-CD14-FCER1A-CD1C-CLEC10A
AKR1C3	1.70408e-11	0.593172	0.335	0.103	2.19349e-07	GBM.PD1	AKR1C3	0.232	Mo-DC1-CD14-FCER1A-CD1C-CLEC10A
SPP1	7.6703e-09	0.758599	0.888	0.792	9.87321e-05	GBM.new	SPP1	0.096	Mo-DC2-CD14-C1QA-CD141
G0S2	3.75071e-06	1.04756	0.562	0.349	0.0482791	GBM.new	G0S2	0.213	Mo-DC2-CD14-C1QA-CD141
CLEC5A	0.00139598	0.688425	0.539	0.407	1	GBM.new	CLEC5A	0.132	Mo-DC2-CD14-C1QA-CD141
FCGBP	0.00795425	0.926319	0.472	0.355	1	GBM.new	FCGBP	0.117	Mo-DC2-CD14-C1QA-CD141
NRP2	4.07936e-13	1.03196	0.532	0.209	5.25096e-09	GBM.rec	NRP2	0.323	Mo-DC2-CD14-C1QA-CD141
IL1R1	4.10622e-11	0.65674	0.306	0.068	5.28552e-07	GBM.rec	IL1R1	0.238	Mo-DC2-CD14-C1QA-CD141
HLA-DQA2	4.01271e-10	0.696637	0.468	0.185	5.16516e-06	GBM.rec	HLA-DQA2	0.283	Mo-DC2-CD14-C1QA-CD141
MRC1	6.3902e-09	0.713519	0.468	0.192	8.22547e-05	GBM.rec	MRC1	0.276	Mo-DC2-CD14-C1QA-CD141
REL	9.3866e-07	0.626121	0.952	0.884	0.0120824	GBM.rec	REL	0.068	Mo-DC2-CD14-C1QA-CD141
NFKB1	1.81793e-06	0.793525	0.79	0.651	0.0234004	GBM.rec	NFKB1	0.139	Mo-DC2-CD14-C1QA-CD141
C15orf48	5.95416e-06	0.605521	0.548	0.325	0.0766419	GBM.rec	C15orf48	0.223	Mo-DC2-CD14-C1QA-CD141
DUSP2	1.29032e-05	0.590008	0.726	0.551	0.166089	GBM.rec	DUSP2	0.175	Mo-DC2-CD14-C1QA-CD141
TRAF1	1.46612e-05	0.60933	0.29	0.123	0.188718	GBM.rec	TRAF1	0.167	Mo-DC2-CD14-C1QA-CD141
SOD2	1.64167e-05	0.710424	0.815	0.692	0.211316	GBM.rec	SOD2	0.123	Mo-DC2-CD14-C1QA-CD141
MMP19	2.05835e-05	0.600309	0.419	0.223	0.264951	GBM.rec	MMP19	0.196	Mo-DC2-CD14-C1QA-CD141
FOLR2	7.13297e-05	0.594132	0.371	0.199	0.918155	GBM.rec	FOLR2	0.172	Mo-DC2-CD14-C1QA-CD141
THBS1	0.000260614	0.673466	0.573	0.428	1	GBM.rec	THBS1	0.145	Mo-DC2-CD14-C1QA-CD141
SDS	0.00259571	0.597613	0.492	0.36	1	GBM.rec	SDS	0.132	Mo-DC2-CD14-C1QA-CD141
ZFAND5	2.36474e-17	0.751112	0.921	0.756	3.0439e-13	GBM.PD1	ZFAND5	0.165	Mo-DC2-CD14-C1QA-CD141
VAMP5	5.02054e-08	0.640035	0.542	0.315	0.000646244	GBM.PD1	VAMP5	0.227	Mo-DC2-CD14-C1QA-CD141
CH25H	7.03709e-06	0.601046	0.399	0.211	0.0905814	GBM.PD1	CH25H	0.188	Mo-DC2-CD14-C1QA-CD141
SPP1	2.48807e-16	1.45547	0.969	0.796	3.20265e-12	GBM.new	SPP1	0.173	Mo-DC3-CD14-C1QA-IL1B
PADI2	1.09056e-05	0.86936	0.594	0.389	0.140376	GBM.new	PADI2	0.205	Mo-DC3-CD14-C1QA-IL1B
FN1	4.01787e-05	0.656801	0.344	0.153	0.51718	GBM.new	FN1	0.191	Mo-DC3-CD14-C1QA-IL1B
FCGBP	0.00072759	0.884212	0.448	0.278	1	GBM.new	FCGBP	0.17	Mo-DC3-CD14-C1QA-IL1B
PLCG2	0.00153347	0.616045	0.417	0.287	1	GBM.new	PLCG2	0.13	Mo-DC3-CD14-C1QA-IL1B
JDP2	0.00299946	0.586799	0.51	0.368	1	GBM.new	JDP2	0.142	Mo-DC3-CD14-C1QA-IL1B
CEBPA	0.00384062	0.903379	0.323	0.192	1	GBM.new	CEBPA	0.131	Mo-DC3-CD14-C1QA-IL1B
CD81	0.00476594	0.636778	0.667	0.686	1	GBM.new	CD81	-0.019	Mo-DC3-CD14-C1QA-IL1B
RANBP9	0.00489772	0.642423	0.312	0.189	1	GBM.new	RANBP9	0.123	Mo-DC3-CD14-C1QA-IL1B
KLF2	0.00886528	0.826887	0.51	0.401	1	GBM.new	KLF2	0.109	Mo-DC3-CD14-C1QA-IL1B
IFITM3	2.29416e-10	0.599373	0.878	0.656	2.95304e-06	GBM.rec	IFITM3	0.222	Mo-DC3-CD14-C1QA-IL1B
IFI27	4.19265e-10	2.0848	0.427	0.177	5.39678e-06	GBM.rec	IFI27	0.25	Mo-DC3-CD14-C1QA-IL1B
IFIT1	5.18136e-09	0.886022	0.26	0.067	6.66944e-05	GBM.rec	IFIT1	0.193	Mo-DC3-CD14-C1QA-IL1B
IFI6	6.41147e-08	1.09867	0.679	0.482	0.000825284	GBM.rec	IFI6	0.197	Mo-DC3-CD14-C1QA-IL1B
IFIT3	2.25747e-07	0.799268	0.366	0.164	0.00290582	GBM.rec	IFIT3	0.202	Mo-DC3-CD14-C1QA-IL1B
LY6E	1.79801e-06	0.870719	0.664	0.478	0.023144	GBM.rec	LY6E	0.186	Mo-DC3-CD14-C1QA-IL1B
ISG15	3.97258e-06	1.39533	0.565	0.435	0.051135	GBM.rec	ISG15	0.13	Mo-DC3-CD14-C1QA-IL1B
LGALS3BP	7.15671e-06	0.889025	0.557	0.398	0.0921211	GBM.rec	LGALS3BP	0.159	Mo-DC3-CD14-C1QA-IL1B
TNF	8.64469e-06	0.658661	0.328	0.14	0.111274	GBM.rec	TNF	0.188	Mo-DC3-CD14-C1QA-IL1B
EGR1	0.00039566	0.598388	0.534	0.381	1	GBM.rec	EGR1	0.153	Mo-DC3-CD14-C1QA-IL1B
EEF1G	0.00101795	0.626621	0.42	0.258	1	GBM.rec	EEF1G	0.162	Mo-DC3-CD14-C1QA-IL1B
TWISTNB	0.00338017	0.757448	0.321	0.197	1	GBM.rec	TWISTNB	0.124	Mo-DC3-CD14-C1QA-IL1B
ANKRD22	1.54624e-12	0.743656	0.498	0.216	1.99032e-08	GBM.PD1	ANKRD22	0.282	Mo-DC3-CD14-C1QA-IL1B
VAMP5	3.13061e-06	0.653227	0.552	0.41	0.0402972	GBM.PD1	VAMP5	0.142	Mo-DC3-CD14-C1QA-IL1B
CH25H	0.00149236	0.621986	0.473	0.344	1	GBM.PD1	CH25H	0.129	Mo-DC3-CD14-C1QA-IL1B
SPP1	2.70643e-19	1.83519	0.913	0.671	3.48372e-15	GBM.new	SPP1	0.242	Mo-DC4-CD14-C1QA-CLEC10A
MALAT1	5.85661e-08	0.655109	0.989	0.98	0.000753863	GBM.new	MALAT1	0.009	Mo-DC4-CD14-C1QA-CLEC10A
CXCL8	1.41545e-06	1.03212	0.446	0.215	0.0182197	GBM.new	CXCL8	0.231	Mo-DC4-CD14-C1QA-CLEC10A
CCL3	0.00093612	0.773343	0.576	0.463	1	GBM.new	CCL3	0.113	Mo-DC4-CD14-C1QA-CLEC10A
CCL4	0.00709159	0.653496	0.533	0.43	1	GBM.new	CCL4	0.103	Mo-DC4-CD14-C1QA-CLEC10A
RASSF2	0.00761249	0.60505	0.13	0.283	1	GBM.new	RASSF2	-0.153	Mo-DC4-CD14-C1QA-CLEC10A
RAB11B	0.00786035	0.585378	0.228	0.391	1	GBM.new	RAB11B	-0.163	Mo-DC4-CD14-C1QA-CLEC10A
WTAP	0.0085494	0.797911	0.174	0.352	1	GBM.new	WTAP	-0.178	Mo-DC4-CD14-C1QA-CLEC10A
GPR183	0.0095285	0.789959	0.533	0.518	1	GBM.new	GPR183	0.015	Mo-DC4-CD14-C1QA-CLEC10A
RNASEK	9.53378e-20	0.897268	0.648	0.213	1.22719e-15	GBM.rec	RNASEK	0.435	Mo-DC4-CD14-C1QA-CLEC10A
EEF1G	6.89033e-18	1.49067	0.6	0.252	8.86924e-14	GBM.rec	EEF1G	0.348	Mo-DC4-CD14-C1QA-CLEC10A
NME2	2.11003e-15	0.858392	0.6	0.201	2.71603e-11	GBM.rec	NME2	0.399	Mo-DC4-CD14-C1QA-CLEC10A
P2RY12	1.06709e-14	0.644871	0.414	0.098	1.37356e-10	GBM.rec	P2RY12	0.316	Mo-DC4-CD14-C1QA-CLEC10A
GABARAP	3.31599e-13	0.844412	0.759	0.469	4.26835e-09	GBM.rec	GABARAP	0.29	Mo-DC4-CD14-C1QA-CLEC10A
FCER1A	9.89715e-10	0.821323	0.503	0.232	1.27396e-05	GBM.rec	FCER1A	0.271	Mo-DC4-CD14-C1QA-CLEC10A
ALKBH7	4.59541e-09	0.598566	0.71	0.433	5.91521e-05	GBM.rec	ALKBH7	0.277	Mo-DC4-CD14-C1QA-CLEC10A
SESN1	1.17521e-08	0.647358	0.441	0.201	0.000151273	GBM.rec	SESN1	0.24	Mo-DC4-CD14-C1QA-CLEC10A
CXCL9	2.10316e-14	1.79916	0.296	0.03	2.70718e-10	GBM.PD1	CXCL9	0.266	Mo-DC4-CD14-C1QA-CLEC10A
GBP5	2.02748e-11	0.931013	0.309	0.063	2.60977e-07	GBM.PD1	GBP5	0.246	Mo-DC4-CD14-C1QA-CLEC10A
AREG	1.18218e-10	1.13281	0.648	0.384	1.5217e-06	GBM.PD1	AREG	0.264	Mo-DC4-CD14-C1QA-CLEC10A
PSME2	3.0482e-09	0.825053	0.728	0.565	3.92364e-05	GBM.PD1	PSME2	0.163	Mo-DC4-CD14-C1QA-CLEC10A
IRF1	2.82772e-08	0.822938	0.463	0.211	0.000363985	GBM.PD1	IRF1	0.252	Mo-DC4-CD14-C1QA-CLEC10A
VAMP5	5.2771e-08	0.749324	0.549	0.35	0.000679268	GBM.PD1	VAMP5	0.199	Mo-DC4-CD14-C1QA-CLEC10A
GBP1	5.36274e-07	1.06664	0.383	0.181	0.00690292	GBM.PD1	GBP1	0.202	Mo-DC4-CD14-C1QA-CLEC10A
CD52	5.54072e-07	0.78	0.321	0.118	0.00713201	GBM.PD1	CD52	0.203	Mo-DC4-CD14-C1QA-CLEC10A
STAT1	6.98791e-07	0.751625	0.488	0.291	0.00899484	GBM.PD1	STAT1	0.197	Mo-DC4-CD14-C1QA-CLEC10A
PSMB9	4.29249e-06	0.643855	0.617	0.498	0.055253	GBM.PD1	PSMB9	0.119	Mo-DC4-CD14-C1QA-CLEC10A
LAP3	6.9177e-06	0.607862	0.648	0.506	0.0890446	GBM.PD1	LAP3	0.142	Mo-DC4-CD14-C1QA-CLEC10A
CRYBG1	2.94255e-05	0.606281	0.383	0.19	0.378764	GBM.PD1	CRYBG1	0.193	Mo-DC4-CD14-C1QA-CLEC10A
ISG20	4.31573e-05	0.660218	0.469	0.312	0.555521	GBM.PD1	ISG20	0.157	Mo-DC4-CD14-C1QA-CLEC10A
PARP14	5.51375e-05	0.606331	0.451	0.283	0.70973	GBM.PD1	PARP14	0.168	Mo-DC4-CD14-C1QA-CLEC10A
WARS	0.000101943	0.810279	0.364	0.215	1	GBM.PD1	WARS	0.149	Mo-DC4-CD14-C1QA-CLEC10A
APOBEC3G	0.000242178	0.668036	0.284	0.143	1	GBM.PD1	APOBEC3G	0.141	Mo-DC4-CD14-C1QA-CLEC10A
RARRES3	0.000607369	0.709968	0.457	0.359	1	GBM.PD1	RARRES3	0.098	Mo-DC4-CD14-C1QA-CLEC10A
